# Supplementary material for: Molecular Mechanism of m6A Methylation Modification Genes METTL3 and FTO in Regulating Heat Stress in Sheep
Source: MDPI journal article supplement (doi:10.3390/ijms241511926), 2023-07-25
Supplement: s1 [file s1]

Table S7 Primer sequence information of qRT-PCR

| Gene           | Primer sequences (5'-3')                               | Accession No.  | Products length (bp) |
|----------------|--------------------------------------------------------|----------------|----------------------|
| <i>METTL3</i>  | F: AGATAGAGAGCCTTCTTAACCA<br>R: TCACTGGCTTTCATACACTCC  | XM_004010362.3 | 196                  |
| <i>METTL14</i> | F: ATATTACAGAGAGACCGGCAT<br>R: CAATCCTTCCCCAGAACCACA   | XM_004009592.3 | 133                  |
| <i>FTO</i>     | R: CTCAGATTCCCTTAAGCCAGT<br>F: CATGGCTTCCCTACCTGACC    | EU072419.1     | 165                  |
| <i>YTHDF3</i>  | R: CTCGAAATAAACAGCCATGCTT<br>F: CCTGTAATTCTACTCGTGGTGA | XM_015097785.1 | 200                  |
| <i>HSP60</i>   | R: AAATATTCTGCTGCACGTTG<br>F: CCTTAATGCTACACGAGCTG     | XM_004004792.3 | 184                  |
| <i>HSP70</i>   | R: AACACCTGCATTCTTAGCAA<br>F: CCCACGAAGCAGACGCAGAT     | JN604434.1     | 106                  |
| <i>HSP90</i>   | R: GCAGGTTGTTGTCCCGAGTCAT<br>F: CAGTTCATTGGCTATCCCAT   | EF091713.1     | 164                  |
| <i>HSP110</i>  | R: TCTTCATCTGAGCCAACGTCT<br>F: ACAAGCTGGAAGAACTAACGAA  | XM_015098145.1 | 129                  |
| <i>ACTB</i>    | R: AGTCAGCTGCTATCTTGGCAT<br>F: CTTCCAGCCTTCCTTCCTGG    | NM_001009784.1 | 180                  |
|                | R: GCCAGGGCAGTGATCTCTTT                                |                |                      |
