# Supplementary material for: Molecular Mechanism of m6A Methylation Modification Genes METTL3 and FTO in Regulating Heat Stress in Sheep
Source: MDPI journal article supplement (doi:10.3390/ijms241511926), 2023-07-25
Supplement: s1 [file s1]

Table S5 Summary of the information of antibody

| Antibody Name | Manufacturer | Host   | Dilution Rate |
|---------------|--------------|--------|---------------|
| METTL3        | Proteintech  | rabbit | 1:200         |
| METTL14       | Proteintech  | Mouse  | 1:200         |
| FTO           | Proteintech  | mouse  | 1:100         |
| WTAP          | Proteintech  | mouse  | 1:100         |
| YTHDC1        | Proteintech  | rabbit | 1:200         |
| YTHDC2        | Proteintech  | rabbit | 1:50          |
| YTHDF1        | Proteintech  | rabbit | 1:400         |
| YTHDF1        | Proteintech  | rabbit | 1:50          |
| YTHDF3        | Proteintech  | rabbit | 1:50          |
| ALKBH5        | Proteintech  | rabbit | 1:200         |
