# Supplementary material for: Molecular Mechanism of m6A Methylation Modification Genes METTL3 and FTO in Regulating Heat Stress in Sheep
Source: MDPI journal article supplement (doi:10.3390/ijms241511926), 2023-07-25
Supplement: s1 [file s1]

Table S1 Summary of the sequencing reads alignment to the reference genome

| Sample   | RawReads (M) | CleanReads (M) | Q30 (%) | GC (%) |
|----------|--------------|----------------|---------|--------|
| Control1 | 49.20        | 47.66          | 96.62   | 54.43  |
| Control2 | 49.13        | 47.50          | 96.24   | 54.81  |
| Control3 | 48.35        | 47.00          | 96.28   | 54.80  |
| HS1      | 50.92        | 48.81          | 96.85   | 51.59  |
| HS2      | 50.86        | 48.52          | 96.59   | 51.54  |
| HS3      | 51.30        | 48.76          | 96.60   | 51.57  |
| M3_OE1   | 50.56        | 48.43          | 96.84   | 51.46  |
| M3_OE2   | 51.58        | 48.90          | 96.90   | 51.39  |
| M3_OE3   | 50.08        | 47.86          | 96.99   | 51.50  |
| M3_sR1   | 50.14        | 48.30          | 96.29   | 51.63  |
| M3_sR2   | 52.73        | 49.13          | 97.00   | 51.95  |
| M3_sR3   | 49.95        | 48.09          | 96.76   | 51.96  |
| FTO_OE1  | 51.49        | 49.12          | 96.92   | 51.69  |
| FTO_OE2  | 51.59        | 48.83          | 96.80   | 51.17  |
| FTO_OE3  | 51.92        | 49.18          | 96.95   | 51.20  |
| FTO_sR1  | 50.27        | 48.08          | 96.73   | 51.92  |
| FTO_sR2  | 50.96        | 48.50          | 97.00   | 51.94  |
| FTO_sR3  | 51.08        | 48.55          | 97.03   | 51.72  |
