# Supplementary material for: Molecular Mechanism of m6A Methylation Modification Genes METTL3 and FTO in Regulating Heat Stress in Sheep
Source: MDPI journal article supplement (doi:10.3390/ijms241511926), 2023-07-25
Supplement: s1 [file s1]

Table S6 Primer sequence information of *METTL3* and *FTO* genes

*METTL3*:

|          |                                                                   |
|----------|-------------------------------------------------------------------|
| B9711-1  | AGGGTTCCAAGCTTAAGCGGCCGCGCCACCATGTCGGACACGTGGAGCTCTATCCAGGCCCA    |
| B9711-2  | TCCGCCTCCGCTGCAGCCTCTCCCGCAGTGAGTCCAGCTGCTTTTGTGGGCCTGGATAGAGCTC  |
| B9711-3  | GCAGCGGAGGCGGAAGCAGGACTCGGGGCACTTGGATCTTCGGAATCCAGAGGCAGCACTGTCTC |
| B9711-4  | ACCAGAAGTGGGTGCAGCAGGTACTGGGCTGTCGCTACGGAAGGTTGGAGACAGTGTGCCTCTG  |
| B9711-5  | GCTGCACCCACTTCTGGTGGCCCCAAGCCAGTACAGCTTCAGCAGTTCCTGAACTAGCTACAGA  |
| B9711-6  | CAGATCAGAGAGGTGGTGTAGCAACTTCTTCTAATTCAGGGTCTGTAGCTAGTTCAGGAACTG   |
| B9711-7  | CTACACCACCTCTCTGATCTGTCACTAACATTGCCACTGATGCTGTGTCTATCCGTCTTGCCAT  |
| B9711-8  | AGGCTTTCTACCCCATCCTGAGTGGCAGGGGCATCTGGCGTGGAGATGGCAAGACGGATAGACAC |
| B9711-9  | AGGATGGGGTAGAAAGCCTCCTACAGAAGTTGCCGCTCAGGAGTTGATCGAAGTAAAGCGAAGT  |
| B9711-10 | CAGCATAGGTCACAAGAGTGGGATGTGCATCGTCTTGTAGGAGACTTCGCTTTACTTCGATCAAC |
| B9711-11 | CCACTCTGTGACCTATGCTGATCATTCGAAGCTCTCCGCCATGATGGGTGCTGTGGCAGAAAAG  |
| B9711-12 | GCCGCTTCTGCCCTGCAATAGTCCCTGCTACCTCCCCAGGGCCCTCTTTTCTGCCACAGCACCC  |
| B9711-13 | CAGGGCAGAAGCGGCGTGCAGAGCAGGACTCCACCACAGCAGCTGCCTTTACTAGCTCTTTGGCC |
| B9711-14 | CTTTGGCTCCTTGGCTACTTCTGATGTGGAAGAGCCAGACCAGAGGCCAAAGAGCTAGTAAAGG  |
| B9711-15 | AAGTAGCCAAGGAGCCAAAGAAATCAAGAAAACATGCTGCCTCAGATGTTGATCTGGAGATAGAG |
| B9711-16 | TTGCTCTGTTGTTCTTAGTAGATTGTTGGTTAAGAAGGCTCTCTATCTCCAGATCAACATCTGA  |
| B9711-17 | TCTACTAAGGAACAACAGAGCAAGAAGGTTAGTCAGGAGATCCTAGAGTTACTAAATACTACAAC |
| B9711-18 | GAGCGAACTTTTCAACAATGGATTGTTCTTGGCTGTGTAGTATTTAGTAACTCTAGGATCTC    |
| B9711-19 | CCATTGTTGAAAAGTTTCGCTCACGAGGTCGGGCTCAAGTTCAAGAGTTCTGTGACTATGGAACC |
| B9711-20 | GACAGGGCCGGTCAGCATCACTGGCTTTCATACACTCCTCCTGGTTCCATAGTCACAGAACTCT  |
| B9711-21 | GCTGACCGGCCCTGTCGAAAGCTGCACTTCAGACGGATCATCAATAAACACACTGATGAGTCATT |
| B9711-22 | ATCCATGTGGAAACATGTGTTAAGGAAAGAGCAGTCTCCTAATGACTCATCAGTGTGTTATTGA  |
| B9711-23 | TTAACACATGTTTCCACATGGATACCTGCAAATATGTTCACTATGAAATTGATGCTTGATGGAT  |
| B9711-24 | GCTCTTGGCTTGGTGTATGGTCTTTGCTTCCAGGAGCCTCAGAATCCATGCAAGCATCAATTCA  |
| B9711-25 | CCATACACCAAGCCAAGAGCTTGCCCTTACACAGAGCGTTGGAGGTGACTCCAATGCAGATCGAC |
| B9711-26 | CGTCCAGGTAGCGGATATCACAACAGATCCACTGAGGTGGGAAGAGTCGATCTGCATTGGAGTCA |
| B9711-27 | TGATATCCGCTACCTGGACGTCACTATCTTGGGCAAGTTGCAGTTGTGATGGCTGACCCACCCT  |

|          |                                                                     |
|----------|---------------------------------------------------------------------|
| B9711-28 | TCTCATCATCTGTCAGGGTCCCATAGGGCAGCTCCATGTGAATATCCCAGGGTGGGTGAGCCATC   |
| B9711-29 | GACCCTGACAGATGATGAGATGCGCAGGCTCAACATACCAGTACTGCAGGATGATGGCTTTCTCT   |
| B9711-30 | GACATTCTCTGCCCAACTCCATGGCCCTGCCTGTGACCCAGAGGAAGAGAAAGCCATCATCCTGC   |
| B9711-31 | GGAGTTGGGCAGAGAATGTCTGAACCTCTGGGGTTATGAACGGGTAGATGAAATTATCTGGGTGA   |
| B9711-32 | TGTGCGGCCCTGTTTCAATGATGCGCTGCAGTTGATTTGTCTTCACCCAGATAATTTTCATCTACCC |
| B9711-33 | TTCGAACAGGCCGCACAGGTCACTGGTTGAACCATGGGAAGGAACACTGCTTGGTTGGTGTCAAA   |
| B9711-34 | GATCACATCACAATCCAGACCCTGGTTGAAGCCTTGGGGATTTCCTTTGACACCAACCAAGCAGT   |
| B9711-35 | GGGTCTGGATTGTGATGTGATCGTAGCTGAGGTTTCCTTCCACTAGTCATAAACCAGATGAAATCT  |
| B9711-36 | ATCTTGCGAGTGCCAGGGGACAGTCTTTCAATCATGCCATAGATTTCATCTGGTTTATGACTAGT   |
| B9711-37 | CCCTGGCACTCGCAAGATTGAGTTATTTGGACGACCACACAATGTGCAACCCAACTGGATCACCC   |
| B9711-38 | ACCACATCTGGGTCTAGTAGGTGGATCCCATCCAATTGGTTTCCAAGGGTGATCCAGTTGGGTG    |
| B9711-39 | CCTACTAGACCCAGATGTGGTTGCCCGGTTCAAGCAAAGATATCCAGATGGTATCATCTCTAAAC   |
| B9711-40 | GATCCATCCCTAGGTAGATGCATCTATAGATTCTTAGGTTTAGAGATGATACCATCTGGATAT     |

*FTO:*

|          |                                                                    |
|----------|--------------------------------------------------------------------|
| B9713-1  | AGGGTTCCAAGCTTAAGCGGCCGCGCCACCATGAAGCGGACCCGACGGCCGAGGAACGAGAGC    |
| B9713-2  | AGCCATGTGTCTTCAAGCTCTTCAAGAAGCCTCAGTTTCTTAGCTTCGCGCTCTCGTTCTCGGC   |
| B9713-3  | GAGCTTGAAGACACATGGCTTCCCTACCTGACCCCAAAGACGATGAATTCTATCAGCAGTGGCA   |
| B9713-4  | GCACGCTGGCAGCTTCTCGGAGAATCAGTTTAGGATATTTTCAGTTGCCACTGCTGATAGAATTCA |
| B9713-5  | GAAGCTGCCAGCGTGCCCGAGTTGCTCCATAAAGAGGTTCAACAAGCCTTTCTCACACTGCACAA  |
| B9713-6  | TCTTTGCCCTGGATCCTCACCAGATCTCGAAATAAACAGCCATGCTTGTGCAGTGTGAGAAAGGC  |
| B9713-7  | TGAGGATCCAGGGCAAAGACTTGCTCACTCCAGTCTCTCGCATCCTCATCGGTAACCCTGGCTGC  |
| B9713-8  | CACGGGCCAGGGTACCGTGAAGAGCCTGGTGTTTCAGTACTTGTAGGTGCAGCCAGGGTTACCGA  |
| B9713-9  | GGTACCCTGGCCCGTAAAGGCTCTGATGCAAAGTACATGAGGCCGAAATAGCTGTGCGCTGTC    |
| B9713-10 | GGATGGTCTCTACCTGCAGGTAACCTGTTGAGCTTGAGGAAGGTTTGACAGGCGACAGCTATTTCG |
| B9713-11 | CTGCAGGTAGAGACCATCCAGGCTTTGGAAGAGCTTGCTGCCAAGGAGAAAGCCAACATCGATGC  |
| B9713-12 | CCCATGCCAACCCCTGGGGAAATCTGGACCTATGCACACTGGCACAGCATCGATGTTGGCTTTCTC |
| B9713-13 | CCAGGGTTGGCATGGGGTCCCTCTTTGACGGGCAGATGAGATTGACATGAAGAACCGAGCAGCG   |
| B9713-14 | TACGGCATTTTCTGGGGATCCATGAAATTCAACAAAGTGACGTTGTACGCTGCTCGGTTCTTCAT  |

|          |                                                                    |
|----------|--------------------------------------------------------------------|
| B9713-15 | GATCCCCAGAAAATGCCGTACCTGAAAGAGGAACCATATTTCCGGCATGGGGAAAATGGCCGTGAG |
| B9713-16 | ACACTGCCACCGCTGACCTGTCCACCAGATTTTCATCATGATGCCAGCTCACGGCCATTTTCCCC  |
| B9713-17 | TCAGCGGTGGCAGGTACAGTTATAGCTGTGAAGGCCCTGAAGAGGAAAGTGAGGATGACCCTCA   |
| B9713-18 | ATCTTAAACCAACGTGCCAAATATCAGGATCTCTGCCTTCAAGCTGAGGGTCATCCTCACTTC    |
| B9713-19 | TTGGCACGTTGGTTTAAAGATCTCGTGGGACATAGAGACACCTGGGTTGGCGATACCCCTTCACC  |
| B9713-20 | TTGGTGGGTGGCATTGAGATCATCAAGCATAAAATAGCAGTCTCCTTGGTGAAGGGGTATCGCCA  |
| B9713-21 | CTCAATGCCACCCACCAACTGTGTTTTGGCTGGTTTACCACCTCGCTTAGTTCCACCCACCG     |
| B9713-22 | GCGCTGTAAGATGTATTCCAAGGTCCCCGTCGAGCACTCTGCCACTCGGTGGGTGGAATAAAGC   |
| B9713-23 | CTTGGAATACATCTTACAGCGCTGCCAGGTGGCCCTGCAGAATGTCCGCGAAGAGGCAGACAACG  |
| B9713-24 | TCCTTGTTTCAAAACCACTGACTCCAAGGATTTCAAAGAGATTTACCGTTGTCTGCCTCTTCGC   |
| B9713-25 | GTCAGTGGTTTTGAAACAAGGAGAAGAGATCCACAACGAGGTCGAGTTTGAATGGCTGAGACAGT  |
| B9713-26 | CCACCAGTCAGTGCACTTTTTGTATCGACTGCCTTGAAACCAGAACTGTCTCAGCCATTCAAACCT |
| B9713-27 | AAAGTGCCTGACTGGTGGTGTGAGCCCATGAGTCAGCTGGAAGAGATGTGGAGAAAGATGGAGT   |
| B9713-28 | ACCCCTCTCTTCTAACTTCACGAAGCACAGCGCTTGTGAGCCACTCCATCTTCTCCACATCTC    |
| B9713-29 | TGAAGTTAGAAGAGAGGGGGTCCCCATGGAACAAAAGAATGAGATGTTGACGTCCATCCTCGCCT  |
| B9713-30 | GGCACCTGGCATGCCATTCTCTCCTCAGGTTCTGGCGGGTGGTGATCGAGGCGAGGATGGACGTC  |
| B9713-31 | TGGCATGCCAGGTGCCAGTCTCGAATTGCCCGGACTTTACCCGCTGATCAGAAGCCAGAGTGCCG  |
| B9713-32 | GGTCGAATGGCAGAGGCATCGAAGGATCACCCCTTTCCAGTATGGCCGGCACTCTGGCTTCTGA   |
| B9713-33 | GCCTCTGCCATTGACCTCACAGAGATCGTTTCTGAACTCAGAGGTCTGCTTCTGGAGACCAGGC   |
| B9713-34 | GATCCATCCCTAGGTAGATGCATCTAGGGCCTGGTCTCCAGAAGCA                     |
