# Supplementary material for: Molecular Mechanism of m6A Methylation Modification Genes METTL3 and FTO in Regulating Heat Stress in Sheep
Source: Int J Mol Sci. 2023 Jul 25;24(15):11926. doi: 10.3390/ijms241511926 (PMC10419070; doi:10.3390/ijms241511926)
Supplement: Supplementary file 1 [file ijms-24-11926-s001.zip]

Archive with 8 entries (8 files):
- ijms-2503857-supplementary.pdf
- Supplements Tables S1-S7/Table S1.pdf
- Supplements Tables S1-S7/Table S2.xlsx
- Supplements Tables S1-S7/Table S3.xlsx
- Supplements Tables S1-S7/Table S4.xlsx
- Supplements Tables S1-S7/Table S5.pdf
- Supplements Tables S1-S7/Table S6.pdf
- Supplements Tables S1-S7/Table S7.pdf
