# Supplementary material for: Molecular Mechanism of m6A Methylation Modification Genes METTL3 and FTO in Regulating Heat Stress in Sheep
Source: Int J Mol Sci. 2023 Jul 25;24(15):11926. doi: 10.3390/ijms241511926 (PMC10419070; doi:10.3390/ijms241511926)
Supplement: Supplementary file 1 [file ijms-24-11926-s001.zip › Supplements Tables S1-S7/Table S2.xlsx]

## Sheet: HS-vs-Control.DEGs
gene_id	BaseMean_DESeq2	BaseMean_control_Control	BaseMean_case_HS	FoldChange	log2FoldChange	p-value	q-value	Regulation	Expression_HS1	Expression_HS2	Expression_HS3	Expression_Control1	Expression_Control2	Expression_Control3	gene_Dbxref	description	GO_id	GO_term	pathway	pathway_description
A2ML1	47.6362	4.61297	90.6595	19.6241	4.29456	4.67239e-18	1.24401e-17	Up	0.501948	0.647437	0.474222	0.028013	0.0277311	0.0224493	GeneID:101123200	alpha-2-macroglobulin like 1	GO:0004867,GO:0005615,GO:0030414,GO:0052548,GO:0070062	serine-type endopeptidase inhibitor activity|extracellular space|peptidase inhibitor activity|regulation of endopeptidase activity|extracellular exosome
A3GALT2	88.5365	130.437	46.636	0.357553	-1.48377	2.67114e-09	5.15388e-09	Down	0.492645	0.465186	0.464245	1.31633	1.19922	1.24218	GeneID:101103704	alpha 1,3-galactosyltransferase 2	GO:0005794,GO:0005975,GO:0006688,GO:0016021,GO:0016757,GO:0030259,GO:0031982,GO:0032580,GO:0046872,GO:0047276	Golgi apparatus|carbohydrate metabolic process|glycosphingolipid biosynthetic process|integral component of membrane|transferase activity, transferring glycosyl groups|lipid glycosylation|vesicle|Golgi cisterna membrane|metal ion binding|N-acetyllactosaminide 3-alpha-galactosyltransferase activity	oas00603	Glycosphingolipid biosynthesis - globo and isoglobo series
A4GALT	229.544	333.347	125.74	0.377192	-1.40663	8.86847e-15	2.09429e-14	Down	0.720654	0.998281	0.691673	1.98518	1.99488	2.05471	GeneID:101106675	alpha 1,4-galactosyltransferase (P blood group)			oas00601,oas00603	Glycosphingolipid biosynthesis - lacto and neolacto series|Glycosphingolipid biosynthesis - globo and isoglobo series
AAAS	2274.41	3371.19	1177.63	0.349357	-1.51723	1.0598e-63	1.21366e-62	Down	16.6349	16.4191	17.4793	43.4281	44.0937	48.9347	GeneID:101104648	aladin WD repeat nucleoporin	GO:0005643,GO:0005654,GO:0005813,GO:0005829,GO:0006913,GO:0007612,GO:0009566,GO:0015031,GO:0031965,GO:0051028	nuclear pore|nucleoplasm|centrosome|cytosol|nucleocytoplasmic transport|learning|fertilization|protein transport|nuclear membrane|mRNA transport	oas03013	RNA transport
AAK1	865.099	426.806	1303.39	3.05321	1.61033	1.46004e-43	9.25979e-43	Up	3.07617	2.68974	2.50983	0.838397	0.934196	0.790098	GeneID:101107425	AP2 associated kinase 1	GO:0004674,GO:0005112,GO:0005524,GO:0005634,GO:0005905,GO:0006468,GO:0006897,GO:0019897,GO:0030100,GO:0030136,GO:0031252,GO:0032880,GO:0035612,GO:0043195,GO:0045747,GO:0046777,GO:0050821,GO:2000369	protein serine/threonine kinase activity|Notch binding|ATP binding|nucleus|clathrin-coated pit|protein phosphorylation|endocytosis|extrinsic component of plasma membrane|regulation of endocytosis|clathrin-coated vesicle|cell leading edge|regulation of protein localization|AP-2 adaptor complex binding|terminal bouton|positive regulation of Notch signaling pathway|protein autophosphorylation|protei…
AAMP	4225.53	5865.8	2585.25	0.440763	-1.18193	4.86037e-41	2.82998e-40	Down	38.7697	38.1907	39.3492	80.6007	77.4075	90.8894	GeneID:101110742	angio associated migratory cell protein	GO:0001525,GO:0005829,GO:0005886,GO:0009986,GO:0010595,GO:0014909,GO:0015630,GO:0030154,GO:0042273,GO:0045171,GO:0051082	angiogenesis|cytosol|plasma membrane|cell surface|positive regulation of endothelial cell migration|smooth muscle cell migration|microtubule cytoskeleton|cell differentiation|ribosomal large subunit biogenesis|intercellular bridge|unfolded protein binding
AAR2	1207.6	1779.58	635.612	0.357201	-1.48519	5.19083e-41	3.01742e-40	Down	4.14762	3.24997	3.78493	9.24595	10.0573	10.2488	GeneID:101121030	AAR2 splicing factor homolog	GO:0000244,GO:0005681	spliceosomal tri-snRNP complex assembly|spliceosomal complex
AARS2	371.344	522.398	220.289	0.421741	-1.24557	5.21256e-20	1.48962e-19	Down	1.32151	1.52003	1.38367	3.20343	3.01085	3.24504	GeneID:101114732	alanyl-tRNA synthetase 2, mitochondrial	GO:0000049,GO:0004813,GO:0005524,GO:0005739,GO:0006400,GO:0006419,GO:0008270,GO:0016597,GO:0033108,GO:0070143	tRNA binding|alanine-tRNA ligase activity|ATP binding|mitochondrion|tRNA modification|alanyl-tRNA aminoacylation|zinc ion binding|amino acid binding|mitochondrial respiratory chain complex assembly|mitochondrial alanyl-tRNA aminoacylation	oas00970	Aminoacyl-tRNA biosynthesis
AASDH	217.781	64.0999	371.463	5.79769	2.53548	1.88901e-43	1.19323e-42	Up	2.45847	2.59915	2.38824	0.438904	0.360004	0.414542	GeneID:101108833	aminoadipate-semialdehyde dehydrogenase	GO:0005524,GO:0006631,GO:0016878,GO:0019482,GO:0043041	ATP binding|fatty acid metabolic process|acid-thiol ligase activity|beta-alanine metabolic process|amino acid activation for nonribosomal peptide biosynthetic process
AASDHPPT	1574.55	912.863	2236.24	2.44925	1.29234	1.14014e-49	8.72092e-49	Up	18.0549	18.065	17.5204	7.51807	6.88534	6.30599	GeneID:101115306	aminoadipate-semialdehyde dehydrogenase-phosphopantetheinyl transferase	GO:0000287,GO:0005829,GO:0008897,GO:0015939,GO:0019878,GO:0070062	magnesium ion binding|cytosol|holo-[acyl-carrier-protein] synthase activity|pantothenate metabolic process|lysine biosynthetic process via aminoadipic acid|extracellular exosome	oas00770	Pantothenate and CoA biosynthesis
ABCA1	2049.08	1016.7	3081.45	3.03078	1.59969	2.5997e-53	2.21225e-52	Up	7.84311	6.95859	6.1217	2.10144	2.30747	2.11573	GeneID:101119015	ATP binding cassette subfamily A member 1			oas02010,oas04975,oas04979	ABC transporters|Fat digestion and absorption|Cholesterol metabolism
ABCA12	37.4038	11.2877	63.5198	5.64318	2.49651	1.64058e-08	3.06509e-08	Up	0.186958	0.205681	0.170076	0.0138574	0.0384104	0.0416445	GeneID:101104887	ATP binding cassette subfamily A member 12			oas02010	ABC transporters
ABCA5	307.053	190.365	423.742	2.22384	1.15306	2.21108e-11	4.62116e-11	Up	1.00142	0.938798	0.881788	0.475047	0.435202	0.292201	GeneID:101115292	ATP binding cassette subfamily A member 5	GO:0000139,GO:0005524,GO:0005765,GO:0005794,GO:0006869,GO:0015918,GO:0016021,GO:0030301,GO:0031902,GO:0042626,GO:0043231	Golgi membrane|ATP binding|lysosomal membrane|Golgi apparatus|lipid transport|sterol transport|integral component of membrane|cholesterol transport|late endosome membrane|ATPase activity, coupled to transmembrane movement of substances|intracellular membrane-bounded organelle	oas02010	ABC transporters
ABCB8	1672.09	2420.09	924.088	0.381866	-1.38886	2.41482e-46	1.67827e-45	Down	5.84779	4.98551	5.28134	12.5199	13.4848	13.8314	GeneID:101103060	ATP binding cassette subfamily B member 8	GO:0005524,GO:0005743,GO:0016021,GO:0042626	ATP binding|mitochondrial inner membrane|integral component of membrane|ATPase activity, coupled to transmembrane movement of substances	oas02010	ABC transporters
ABCC2	14.5102	6.88367	22.1367	3.208	1.68167	0.01487	0.0200942	Up	0.0607716	0.0465728	0.0871473	0.00823666	0.0380509	0.0110013	GeneID:101119776	ATP binding cassette subfamily C member 2			oas01523,oas01524,oas02010,oas04976	Antifolate resistance|Platinum drug resistance|ABC transporters|Bile secretion
ABCC5	1386.16	549.625	2222.69	4.04341	2.01557	2.67012e-94	5.6702e-93	Up	6.02616	5.74414	5.65727	1.27787	1.51995	1.27517	GeneID:101123431	ATP binding cassette subfamily C member 5			oas01523,oas02010	Antifolate resistance|ABC transporters
ABCD3	752.207	440.454	1063.96	2.41453	1.27174	9.19708e-28	3.40776e-27	Up	8.33249	8.10387	8.27967	3.21157	3.71871	2.75131	GeneID:101118659	ATP binding cassette subfamily D member 3			oas02010,oas04146	ABC transporters|Peroxisome
ABCE1	1916.63	595.755	3237.5	5.43442	2.44213	1.76266e-17	4.58848e-17	Up	24.1558	24.1451	25.8624	5.76704	2.75167	4.37764	GeneID:101110874	ATP binding cassette subfamily E member 1	GO:0000054,GO:0005506,GO:0005524,GO:0005737,GO:0005739,GO:0005829,GO:0006413,GO:0006415,GO:0016887,GO:0043024,GO:0060698,GO:0060702	ribosomal subunit export from nucleus|iron ion binding|ATP binding|cytoplasm|mitochondrion|cytosol|translational initiation|translational termination|ATPase activity|ribosomal small subunit binding|endoribonuclease inhibitor activity|negative regulation of endoribonuclease activity
ABCF2	5009.51	6739.83	3279.19	0.486559	-1.03931	4.87647e-47	3.46572e-46	Down	30.1901	29.9638	30.3783	56.8018	58.3929	60.4469	GeneID:101103804	ATP binding cassette subfamily F member 2	GO:0005524,GO:0016887	ATP binding|ATPase activity
ABCG2	307.961	197.835	418.087	2.11259	1.07901	9.22395e-13	2.02884e-12	Up	3.21778	3.53878	3.26972	1.7477	1.39597	1.34498	GeneID:780508	ATP binding cassette subfamily G member 2 (Junior blood group)	GO:0005524,GO:0005886,GO:0015238,GO:0016021,GO:0016324,GO:0031966,GO:0033344,GO:0042626,GO:0043235,GO:0055085	ATP binding|plasma membrane|drug transmembrane transporter activity|integral component of membrane|apical plasma membrane|mitochondrial membrane|cholesterol efflux|ATPase activity, coupled to transmembrane movement of substances|receptor complex|transmembrane transport	oas01523,oas02010,oas04976	Antifolate resistance|ABC transporters|Bile secretion
ABCG5	1.65579	0	3.31159	18.1714	4.1836	0.0406066	0.0525097	Up	0.0357772	0.0599772	0.0239423	0	0	0	GeneID:101113924	ATP binding cassette subfamily G member 5			oas02010,oas04975,oas04976,oas04979	ABC transporters|Fat digestion and absorption|Bile secretion|Cholesterol metabolism
ABHD11	2408.58	3525.81	1291.34	0.366295	-1.44892	1.0028e-37	5.21035e-37	Down	29.2925	26.6871	29.844	68.4697	66.69	85.621	GeneID:101112190	abhydrolase domain containing 11	GO:0005739,GO:0016787	mitochondrion|hydrolase activity
ABHD13	654.025	255.573	1052.48	4.11686	2.04154	7.01937e-57	6.55713e-56	Up	5.27238	5.34289	5.12909	1.45993	1.0654	1.09216	GeneID:101116488	abhydrolase domain containing 13	GO:0002084,GO:0008474,GO:0016020,GO:0016021,GO:0032839	protein depalmitoylation|palmitoyl-(protein) hydrolase activity|membrane|integral component of membrane|dendrite cytoplasm
ABHD16A	2463.3	3291.07	1635.52	0.496993	-1.0087	1.05516e-36	5.30505e-36	Down	22.9735	22.2048	22.2964	42.095	41.7608	44.3139	GeneID:101118906	abhydrolase domain containing 16A	GO:0016021,GO:0016787	integral component of membrane|hydrolase activity
ABHD17A	3611.14	5371.69	1850.59	0.344535	-1.53728	2.67688e-52	2.21011e-51	Down	30.8323	32.7258	34.0204	84.2603	81.7963	100.891	GeneID:101117506	abhydrolase domain containing 17A	GO:0008474,GO:0010008,GO:0014069,GO:0030054,GO:0043197,GO:0045211	palmitoyl-(protein) hydrolase activity|endosome membrane|postsynaptic density|cell junction|dendritic spine|postsynaptic membrane
ABHD17B	213.983	96.5957	331.371	3.42925	1.77789	6.33075e-17	1.61588e-16	Up	1.85526	2.31499	2.23991	0.804474	0.443098	0.521089	GeneID:101102206	abhydrolase domain containing 17B	GO:0002084,GO:0008474,GO:0016020,GO:0018345,GO:0030054,GO:0043197,GO:0055038,GO:0098978,GO:0099031,GO:0099033,GO:1902473,GO:1902817,GO:1902950,GO:1905668	protein depalmitoylation|palmitoyl-(protein) hydrolase activity|membrane|protein palmitoylation|cell junction|dendritic spine|recycling endosome membrane|glutamatergic synapse|anchored component of postsynaptic density membrane|anchored component of postsynaptic recycling endosome membrane|regulation of protein localization to synapse|negative regulation of protein localization to microtubule|reg…
ABHD18	211.917	50.106	373.728	7.45439	2.89809	1.82643e-06	3.12198e-06	Up	2.72954	2.54888	2.63483	0.655687	0.196693	0.15923	GeneID:101121294	abhydrolase domain containing 18	GO:0005576	extracellular region
ABHD8	450.126	628.505	271.747	0.432473	-1.20932	1.14956e-18	3.13624e-18	Down	3.23862	3.47116	4.23691	8.13489	7.52945	8.22469	GeneID:101115366	abhydrolase domain containing 8	GO:0052689,GO:0055088	carboxylic ester hydrolase activity|lipid homeostasis
ABI1	1838.89	995.389	2682.38	2.69401	1.42975	1.99508e-47	1.43013e-46	Up	20.3441	21.2555	21.8781	8.29632	7.76592	6.23489	GeneID:101119744	abl interactor 1
ABI3BP	1432.88	924.342	1941.42	2.10099	1.07107	2.98448e-20	8.60892e-20	Up	8.40184	8.15413	8.26882	3.15568	3.70991	4.27097	GeneID:101108803	ABI family member 3 binding protein	GO:0005201,GO:0005518,GO:0005576,GO:0005614,GO:0005615,GO:0008201,GO:0010811,GO:0030198,GO:0062023	extracellular matrix structural constituent|collagen binding|extracellular region|interstitial matrix|extracellular space|heparin binding|positive regulation of cell-substrate adhesion|extracellular matrix organization|collagen-containing extracellular matrix
ABL2	691.281	416.118	966.444	2.3219	1.21531	1.2783e-25	4.41597e-25	Up	3.6622	3.15639	3.28847	1.36755	1.50601	1.24211	GeneID:101121110	ABL proto-oncogene 2, non-receptor tyrosine kinase			oas04012,oas04014,oas05416	ErbB signaling pathway|Ras signaling pathway|Viral myocarditis
ABRAXAS1	244.14	85.1892	403.091	4.73233	2.24255	1.03688e-34	4.89963e-34	Up	3.13937	3.0472	3.41132	0.781846	0.508614	0.626562	GeneID:101109880	abraxas 1, BRCA1 A complex subunit	GO:0005634,GO:0006302,GO:0006325,GO:0010212,GO:0016604,GO:0031593,GO:0045739,GO:0070531,GO:0072425	nucleus|double-strand break repair|chromatin organization|response to ionizing radiation|nuclear body|polyubiquitin modification-dependent protein binding|positive regulation of DNA repair|BRCA1-A complex|signal transduction involved in G2 DNA damage checkpoint	oas03440	Homologous recombination
ABRAXAS2	128.802	62.247	195.357	3.14197	1.65167	3.50425e-12	7.55383e-12	Up	1.8311	1.4315	2.11106	0.498812	0.493792	0.620289	GeneID:101114481	abraxas 2, BRISC complex subunit	GO:0000278,GO:0000922,GO:0002931,GO:0005737,GO:0005874,GO:0007059,GO:0008017,GO:0008608,GO:0031593,GO:0051301,GO:0070536,GO:0070552,GO:0090307	mitotic cell cycle|spindle pole|response to ischemia|cytoplasm|microtubule|chromosome segregation|microtubule binding|attachment of spindle microtubules to kinetochore|polyubiquitin modification-dependent protein binding|cell division|protein K63-linked deubiquitination|BRISC complex|mitotic spindle assembly
ACAA1	1568.32	2322.34	814.295	0.350666	-1.51183	2.04368e-58	2.01e-57	Down	14.0148	13.3977	13.4537	37.7544	33.8002	38.4646	GeneID:101110625	acetyl-CoA acyltransferase 1	GO:0000038,GO:0003988,GO:0005576,GO:0005777,GO:0005782,GO:0005829,GO:0006625,GO:0006635,GO:0008206,GO:0008775,GO:0010124,GO:0016020,GO:0016401,GO:0033540,GO:0035580,GO:0036109,GO:0043231,GO:0043312	very long-chain fatty acid metabolic process|acetyl-CoA C-acyltransferase activity|extracellular region|peroxisome|peroxisomal matrix|cytosol|protein targeting to peroxisome|fatty acid beta-oxidation|bile acid metabolic process|acetate CoA-transferase activity|phenylacetate catabolic process|membrane|palmitoyl-CoA oxidase activity|fatty acid beta-oxidation using acyl-CoA oxidase|specific granule …	oas00071,oas00280,oas00592,oas01040,oas03320,oas04146	Fatty acid degradation|Valine, leucine and isoleucine degradation|alpha-Linolenic acid metabolism|Biosynthesis of unsaturated fatty acids|PPAR signaling pathway|Peroxisome
ACAD11	332.484	141.707	523.261	3.69605	1.88599	2.08023e-30	8.51786e-30	Up	3.24583	3.27092	3.14816	0.88975	0.634859	0.943382	GeneID:101118915	acyl-CoA dehydrogenase family member 11	GO:0005634,GO:0005777,GO:0017099,GO:0031966,GO:0033539,GO:0050660,GO:0070991	nucleus|peroxisome|very-long-chain-acyl-CoA dehydrogenase activity|mitochondrial membrane|fatty acid beta-oxidation using acyl-CoA dehydrogenase|flavin adenine dinucleotide binding|medium-chain-acyl-CoA dehydrogenase activity
ACAD9	2295.1	3061.42	1528.79	0.499402	-1.00173	2.00991e-35	9.70178e-35	Down	19.3185	18.9407	18.2903	34.9094	35.2454	36.755	GeneID:101111495	acyl-CoA dehydrogenase family member 9	GO:0000062,GO:0001676,GO:0004466,GO:0005634,GO:0005739,GO:0005743,GO:0017099,GO:0030425,GO:0031966,GO:0032981,GO:0050660,GO:0051791,GO:0070991	fatty-acyl-CoA binding|long-chain fatty acid metabolic process|long-chain-acyl-CoA dehydrogenase activity|nucleus|mitochondrion|mitochondrial inner membrane|very-long-chain-acyl-CoA dehydrogenase activity|dendrite|mitochondrial membrane|mitochondrial respiratory chain complex I assembly|flavin adenine dinucleotide binding|medium-chain fatty acid metabolic process|medium-chain-acyl-CoA dehydrogena…
ACADL	369.289	68.0994	670.479	9.85301	3.30056	6.62909e-83	1.1532e-81	Up	6.8598	5.96322	5.92339	0.691058	0.476275	0.630918	GeneID:101123271	acyl-CoA dehydrogenase long chain	GO:0004466,GO:0005739,GO:0005759,GO:0016401,GO:0019254,GO:0033539,GO:0042758,GO:0050660	long-chain-acyl-CoA dehydrogenase activity|mitochondrion|mitochondrial matrix|palmitoyl-CoA oxidase activity|carnitine metabolic process, CoA-linked|fatty acid beta-oxidation using acyl-CoA dehydrogenase|long-chain fatty acid catabolic process|flavin adenine dinucleotide binding	oas00071,oas03320	Fatty acid degradation|PPAR signaling pathway
ACADS	1573.96	2118.43	1029.5	0.486023	-1.0409	4.41667e-34	2.03337e-33	Down	13.8673	14.0168	14.6168	27.2168	26.9173	28.4151	GeneID:101119850	acyl-CoA dehydrogenase short chain	GO:0003995,GO:0004085,GO:0005739,GO:0005759,GO:0046359,GO:0050660	acyl-CoA dehydrogenase activity|butyryl-CoA dehydrogenase activity|mitochondrion|mitochondrial matrix|butyrate catabolic process|flavin adenine dinucleotide binding	oas00071,oas00280,oas00650	Fatty acid degradation|Valine, leucine and isoleucine degradation|Butanoate metabolism
ACADSB	623.593	306.697	940.488	3.0656	1.61617	1.64468e-46	1.14868e-45	Up	4.73776	4.89086	5.19385	1.55745	1.61984	1.39229	GeneID:101102606	acyl-CoA dehydrogenase short/branched chain	GO:0003995,GO:0005739,GO:0005759,GO:0006631,GO:0050660	acyl-CoA dehydrogenase activity|mitochondrion|mitochondrial matrix|fatty acid metabolic process|flavin adenine dinucleotide binding	oas00071,oas00280	Fatty acid degradation|Valine, leucine and isoleucine degradation
ACAP2	608.242	127.065	1089.42	8.58249	3.1014	3.51262e-105	8.96732e-104	Up	8.47275	9.16954	7.66684	0.966652	0.784246	1.03385	GeneID:101102615	ArfGAP with coiled-coil, ankyrin repeat and PH domains 2	GO:0005096,GO:0010008,GO:0016020,GO:0017137,GO:0032456,GO:0046872,GO:0080025,GO:1990090	GTPase activator activity|endosome membrane|membrane|Rab GTPase binding|endocytic recycling|metal ion binding|phosphatidylinositol-3,5-bisphosphate binding|cellular response to nerve growth factor stimulus	oas04144	Endocytosis
ACAT1	1965.81	1243.14	2688.48	2.16229	1.11256	8.5238e-42	5.07801e-41	Up	41.5724	43.1094	43.2584	19.8399	19.2129	16.8924	GeneID:101104601	acetyl-CoA acetyltransferase 1	GO:0003985,GO:0003988,GO:0005739,GO:0006085,GO:0006550,GO:0006635,GO:0015937,GO:0016830,GO:0016885,GO:0046356,GO:0046872,GO:0046952,GO:1902860	acetyl-CoA C-acetyltransferase activity|acetyl-CoA C-acyltransferase activity|mitochondrion|acetyl-CoA biosynthetic process|isoleucine catabolic process|fatty acid beta-oxidation|coenzyme A biosynthetic process|carbon-carbon lyase activity|ligase activity, forming carbon-carbon bonds|acetyl-CoA catabolic process|metal ion binding|ketone body catabolic process|propionyl-CoA biosynthetic process	oas00071,oas00072,oas00280,oas00310,oas00380,oas00620,oas00630,oas00640,oas00650,oas00900	Fatty acid degradation|Synthesis and degradation of ketone bodies|Valine, leucine and isoleucine degradation|Lysine degradation|Tryptophan metabolism|Pyruvate metabolism|Glyoxylate and dicarboxylate metabolism|Propanoate metabolism|Butanoate metabolism|Terpenoid backbone biosynthesis
ACBD3	2556.05	1290.2	3821.91	2.96183	1.56649	3.96087e-86	7.27513e-85	Up	26.8975	27.215	26.1865	8.61582	9.16668	7.84734	GeneID:101105589	acyl-CoA binding domain containing 3	GO:0000062,GO:0000139,GO:0005739,GO:0005794,GO:0006694,GO:0016020,GO:0034237	fatty-acyl-CoA binding|Golgi membrane|mitochondrion|Golgi apparatus|steroid biosynthetic process|membrane|protein kinase A regulatory subunit binding
ACBD4	176.659	235.828	117.49	0.498329	-1.00483	1.30772e-05	2.14934e-05	Down	1.06535	1.23846	0.80644	1.47469	2.09136	2.31546	GeneID:101118970	acyl-CoA binding domain containing 4	GO:0000062,GO:0008289	fatty-acyl-CoA binding|lipid binding
ACBD5	226.279	49.6099	402.949	8.10412	3.01865	1.53316e-43	9.70609e-43	Up	2.88089	3.02311	2.55819	0.466488	0.29919	0.223776	GeneID:101119491	acyl-CoA binding domain containing 5	GO:0000062,GO:0005778,GO:0008289,GO:0016021,GO:0030242	fatty-acyl-CoA binding|peroxisomal membrane|lipid binding|integral component of membrane|autophagy of peroxisome
ACD	778.191	1063.27	493.114	0.463876	-1.10819	2.70894e-21	8.10332e-21	Down	6.42007	7.01853	6.90876	12.6853	13.4519	15.2281	GeneID:101109037	ACD shelterin complex subunit and telomerase recruitment factor	GO:0000723,GO:0000783,GO:0000784,GO:0001501,GO:0001655,GO:0005654,GO:0006886,GO:0016233,GO:0016604,GO:0030326,GO:0031848,GO:0032202,GO:0032211,GO:0032212,GO:0035282,GO:0042162,GO:0044877,GO:0051973,GO:0060381,GO:0070182,GO:0070187,GO:0070198,GO:0070200,GO:1902496,GO:1902990,GO:1905324	telomere maintenance|nuclear telomere cap complex|nuclear chromosome, telomeric region|skeletal system development|urogenital system development|nucleoplasm|intracellular protein transport|telomere capping|nuclear body|embryonic limb morphogenesis|protection from non-homologous end joining at telomere|telomere assembly|negative regulation of telomere maintenance via telomerase|positive regulation…
ACO2	7596.08	10281.6	4910.56	0.477616	-1.06608	4.36438e-52	3.58452e-51	Down	47.5854	48.2215	47.4674	90.5025	96.1686	96.5286	GeneID:101103148	aconitase 2	GO:0003994,GO:0005506,GO:0005739,GO:0005829,GO:0006099,GO:0006101,GO:0008198,GO:0043209,GO:0051538,GO:0051539	aconitate hydratase activity|iron ion binding|mitochondrion|cytosol|tricarboxylic acid cycle|citrate metabolic process|ferrous iron binding|myelin sheath|3 iron, 4 sulfur cluster binding|4 iron, 4 sulfur cluster binding	oas00020,oas00630	Citrate cycle (TCA cycle)|Glyoxylate and dicarboxylate metabolism
ACOT13	78.7643	27.2305	130.298	4.77418	2.25525	5.11347e-11	1.053e-10	Up	1.59403	1.96584	1.92012	0.249862	0.611861	0.223949	GeneID:101118059	acyl-CoA thioesterase 13	GO:0005634,GO:0005739,GO:0005819,GO:0005829,GO:0006637,GO:0047617,GO:0051289,GO:0120163	nucleus|mitochondrion|spindle|cytosol|acyl-CoA metabolic process|acyl-CoA hydrolase activity|protein homotetramerization|negative regulation of cold-induced thermogenesis
ACOT7	1472.09	2124.38	819.814	0.385957	-1.37349	4.91838e-51	3.90791e-50	Down	10.8567	11.1791	11.6735	26.6313	26.8979	28.8931	GeneID:101121789	acyl-CoA thioesterase 7	GO:0000062,GO:0005654,GO:0005739,GO:0005829,GO:0006637,GO:0009062,GO:0015937,GO:0016290,GO:0036042,GO:0036114,GO:0036116,GO:0042803,GO:0043005,GO:0047617,GO:0051792,GO:0052689,GO:0070062,GO:0102991,GO:1900535	fatty-acyl-CoA binding|nucleoplasm|mitochondrion|cytosol|acyl-CoA metabolic process|fatty acid catabolic process|coenzyme A biosynthetic process|palmitoyl-CoA hydrolase activity|long-chain fatty acyl-CoA binding|medium-chain fatty-acyl-CoA catabolic process|long-chain fatty-acyl-CoA catabolic process|protein homodimerization activity|neuron projection|acyl-CoA hydrolase activity|medium-chain fatt…	oas00062,oas01040	Fatty acid elongation|Biosynthesis of unsaturated fatty acids
ACOT8	1000.51	1537.61	463.422	0.301439	-1.73006	2.55536e-49	1.93991e-48	Down	10.5298	11.209	10.2275	31.6964	30.758	37.544	GeneID:101115474	acyl-CoA thioesterase 8	GO:0003986,GO:0005102,GO:0005782,GO:0005829,GO:0006625,GO:0006637,GO:0006699,GO:0009062,GO:0016032,GO:0016289,GO:0016290,GO:0016559,GO:0033540,GO:0033882,GO:0036109,GO:0043649,GO:0045225,GO:0047617,GO:0052689,GO:0052815	acetyl-CoA hydrolase activity|signaling receptor binding|peroxisomal matrix|cytosol|protein targeting to peroxisome|acyl-CoA metabolic process|bile acid biosynthetic process|fatty acid catabolic process|viral process|CoA hydrolase activity|palmitoyl-CoA hydrolase activity|peroxisome fission|fatty acid beta-oxidation using acyl-CoA oxidase|choloyl-CoA hydrolase activity|alpha-linolenic acid metabo…	oas00120,oas04146	Primary bile acid biosynthesis|Peroxisome
ACOX1	2588.06	1627	3549.13	2.18114	1.12508	1.55657e-37	8.03449e-37	Up	16.227	16.1477	15.4154	6.70148	7.7265	6.28694	GeneID:101118626	acyl-CoA oxidase 1	GO:0000038,GO:0003997,GO:0005504,GO:0005777,GO:0006091,GO:0006629,GO:0006693,GO:0016401,GO:0019395,GO:0033540,GO:0050660,GO:0055088,GO:0071949	very long-chain fatty acid metabolic process|acyl-CoA oxidase activity|fatty acid binding|peroxisome|generation of precursor metabolites and energy|lipid metabolic process|prostaglandin metabolic process|palmitoyl-CoA oxidase activity|fatty acid oxidation|fatty acid beta-oxidation using acyl-CoA oxidase|flavin adenine dinucleotide binding|lipid homeostasis|FAD binding	oas00071,oas00592,oas01040,oas03320,oas04024,oas04146	Fatty acid degradation|alpha-Linolenic acid metabolism|Biosynthesis of unsaturated fatty acids|PPAR signaling pathway|cAMP signaling pathway|Peroxisome
ACSF2	3253.72	4347.84	2159.61	0.49674	-1.00944	4.58113e-33	2.04194e-32	Down	26.5471	23.6065	25.3523	46.7419	46.4989	50.2301	GeneID:101105582	acyl-CoA synthetase family member 2	GO:0005524,GO:0005739,GO:0006631,GO:0016874	ATP binding|mitochondrion|fatty acid metabolic process|ligase activity
ACSL3	2554.7	1057.53	4051.86	3.83208	1.93813	1.22289e-137	5.56121e-136	Up	25.4722	25.1429	25.2594	6.34914	5.98954	6.36016	GeneID:101120728	acyl-CoA synthetase long chain family member 3	GO:0004467,GO:0005524,GO:0005741,GO:0005778,GO:0005783,GO:0005789,GO:0005794,GO:0005811,GO:0006633,GO:0007420,GO:0007584,GO:0014070,GO:0016020,GO:0016021,GO:0019901,GO:0019904,GO:0034379,GO:0035338,GO:0042998,GO:0044539,GO:0048471,GO:0051047,GO:0102391,GO:2001247	long-chain fatty acid-CoA ligase activity|ATP binding|mitochondrial outer membrane|peroxisomal membrane|endoplasmic reticulum|endoplasmic reticulum membrane|Golgi apparatus|lipid droplet|fatty acid biosynthetic process|brain development|response to nutrient|response to organic cyclic compound|membrane|integral component of membrane|protein kinase binding|protein domain specific binding|very-low-d…	oas00061,oas00071,oas03320,oas04146,oas04216,oas04714,oas04920	Fatty acid biosynthesis|Fatty acid degradation|PPAR signaling pathway|Peroxisome|Ferroptosis|Thermogenesis|Adipocytokine signaling pathway
ACSL4	3818.96	1598.97	6038.95	3.77725	1.91733	1.79301e-122	6.38753e-121	Up	31.536	31.3632	31.3669	8.31969	7.15813	8.08957	GeneID:101111781	acyl-CoA synthetase long chain family member 4	GO:0004467,GO:0005524,GO:0005737,GO:0005741,GO:0005778,GO:0005789,GO:0005811,GO:0006629,GO:0007584,GO:0008610,GO:0015908,GO:0016020,GO:0016021,GO:0019432,GO:0030307,GO:0031957,GO:0032307,GO:0035338,GO:0043025,GO:0044233,GO:0047676,GO:0060136,GO:0060996,GO:0070062,GO:0070672,GO:0102391	long-chain fatty acid-CoA ligase activity|ATP binding|cytoplasm|mitochondrial outer membrane|peroxisomal membrane|endoplasmic reticulum membrane|lipid droplet|lipid metabolic process|response to nutrient|lipid biosynthetic process|fatty acid transport|membrane|integral component of membrane|triglyceride biosynthetic process|positive regulation of cell growth|very long-chain fatty acid-CoA ligase …	oas00061,oas00071,oas03320,oas04146,oas04216,oas04714,oas04920	Fatty acid biosynthesis|Fatty acid degradation|PPAR signaling pathway|Peroxisome|Ferroptosis|Thermogenesis|Adipocytokine signaling pathway
ACSM3	5.60958	1.31589	9.90328	7.51275	2.90934	0.0108815	0.0148894	Up	0.0628021	0.101071	0.214341	0.0238333	0.0117967	0.0119373	GeneID:101121307	acyl-CoA synthetase medium chain family member 3	GO:0005524,GO:0005759,GO:0006633,GO:0015645,GO:0046872,GO:0047760	ATP binding|mitochondrial matrix|fatty acid biosynthetic process|fatty acid ligase activity|metal ion binding|butyrate-CoA ligase activity	oas00650	Butanoate metabolism
ACSS3	6.46286	2.32348	10.6022	4.57383	2.1934	0.029012	0.0381193	Up	0.088294	0.0888101	0.025323	0.0179504	0.00592324	0.0179815	GeneID:101103801	acyl-CoA synthetase short chain family member 3	GO:0003987,GO:0005524,GO:0005739	acetate-CoA ligase activity|ATP binding|mitochondrion	oas00640	Propanoate metabolism
ACTG1	305129	424138	186120	0.43882	-1.1883	1.70846e-59	1.73708e-58	Down	2526.8	2591.1	2553.37	5324	5315.28	5855.28	GeneID:443340	actin gamma 1	GO:0005524,GO:0005856,GO:0005886,GO:0005925,GO:0097433	ATP binding|cytoskeleton|plasma membrane|focal adhesion|dense body	oas04015,oas04145,oas04210,oas04390,oas04510,oas04520,oas04530,oas04611,oas04670,oas04714,oas04810,oas04919,oas04921,oas05100,oas05132,oas05164,oas05205,oas05225,oas05410,oas05412,oas05414,oas05416,oas05418	Rap1 signaling pathway|Phagosome|Apoptosis|Hippo signaling pathway|Focal adhesion|Adherens junction|Tight junction|Platelet activation|Leukocyte transendothelial migration|Thermogenesis|Regulation of actin cytoskeleton|Thyroid hormone signaling pathway|Oxytocin signaling pathway|Bacterial invasion of epithelial cells|Salmonella infection|Influenza A|Proteoglycans in cancer|Hepatocellular carcinom…
ACTL6A	663.257	302.964	1023.55	3.37651	1.75553	3.83032e-40	2.16256e-39	Up	14.6961	14.6518	15.3006	5.12964	3.95707	3.43025	GeneID:101108709	actin like 6A	GO:0000790,GO:0001825,GO:0003407,GO:0003682,GO:0003713,GO:0005634,GO:0005654,GO:0005886,GO:0006281,GO:0006310,GO:0006338,GO:0006357,GO:0007165,GO:0016514,GO:0016579,GO:0021510,GO:0031011,GO:0032991,GO:0035267,GO:0040008,GO:0043044,GO:0043967,GO:0043968,GO:0071564	nuclear chromatin|blastocyst formation|neural retina development|chromatin binding|transcription coactivator activity|nucleus|nucleoplasm|plasma membrane|DNA repair|DNA recombination|chromatin remodeling|regulation of transcription by RNA polymerase II|signal transduction|SWI/SNF complex|protein deubiquitination|spinal cord development|Ino80 complex|protein-containing complex|NuA4 histone acetylt…	oas04714,oas05225	Thermogenesis|Hepatocellular carcinoma
ACTN3	112.91	162.652	63.1671	0.388466	-1.36414	5.59629e-09	1.06597e-08	Down	0.563303	0.566596	0.583401	1.15369	1.52837	1.47861	GeneID:101115917	actinin alpha 3	GO:0003779,GO:0005509,GO:0005737,GO:0005815,GO:0007030,GO:0007041,GO:0019894,GO:0030036,GO:0030507,GO:0031941,GO:0032029,GO:0032391,GO:0034452,GO:0045505,GO:0097381	actin binding|calcium ion binding|cytoplasm|microtubule organizing center|Golgi organization|lysosomal transport|kinesin binding|actin cytoskeleton organization|spectrin binding|filamentous actin|myosin tail binding|photoreceptor connecting cilium|dynactin binding|dynein intermediate chain binding|photoreceptor disc membrane	oas05412	Arrhythmogenic right ventricular cardiomyopathy (ARVC)
ACTR10	917.844	472.248	1363.44	2.8874	1.52977	4.98703e-49	3.75567e-48	Up	16.0387	16.3532	15.358	5.68571	4.7609	5.17979	GeneID:101115545	actin related protein 10	GO:0005737,GO:0005869,GO:0007018	cytoplasm|dynactin complex|microtubule-based movement
ACTR1A	14746.8	20835.4	8658.2	0.41556	-1.26687	2.5281e-56	2.32477e-55	Down	77.204	80.9998	83.7299	179.281	172.857	197.047	GeneID:101108440	actin related protein 1A	GO:0002177,GO:0005524,GO:0005737,GO:0005813,GO:0005814,GO:0005869,GO:0007283,GO:0015630,GO:0030137,GO:0043209,GO:0099738	manchette|ATP binding|cytoplasm|centrosome|centriole|dynactin complex|spermatogenesis|microtubule cytoskeleton|COPI-coated vesicle|myelin sheath|cell cortex region
ACTR1B	2391.81	3353.99	1429.63	0.426291	-1.23009	1.30075e-43	8.27925e-43	Down	16.6168	16.0773	17.2114	35.5369	35.3198	39.5904	GeneID:101112894	actin related protein 1B	GO:0005524,GO:0005737,GO:0005815,GO:0005869	ATP binding|cytoplasm|microtubule organizing center|dynactin complex
ACTR2	8725.28	5232.93	12217.6	2.33468	1.22322	1.94689e-81	3.32146e-80	Up	101.319	104.902	104.211	43.39	42.9455	39.3417	GeneID:101112965	actin related protein 2	GO:0003779,GO:0005200,GO:0005524,GO:0005576,GO:0005634,GO:0005737,GO:0005829,GO:0005885,GO:0005925,GO:0007163,GO:0008306,GO:0008356,GO:0014069,GO:0015629,GO:0016020,GO:0016344,GO:0016482,GO:0030027,GO:0030478,GO:0033206,GO:0034314,GO:0035578,GO:0035861,GO:0035902,GO:0035984,GO:0038096,GO:0043312,GO:0045471,GO:0045944,GO:0048013,GO:0051653,GO:0060271,GO:0061003,GO:0061024,GO:0061825,GO:0070062,GO:…	actin binding|structural constituent of cytoskeleton|ATP binding|extracellular region|nucleus|cytoplasm|cytosol|Arp2/3 protein complex|focal adhesion|establishment or maintenance of cell polarity|associative learning|asymmetric cell division|postsynaptic density|actin cytoskeleton|membrane|meiotic chromosome movement towards spindle pole|cytosolic transport|lamellipodium|actin cap|meiotic cytokin…	oas04530	Tight junction
ACTR3	11758.6	5257.74	18259.4	3.4726	1.79601	1.34945e-73	1.94947e-72	Up	160.149	166.072	168.551	47.6695	51.0069	36.2237	GeneID:101108990	actin related protein 3	GO:0003779,GO:0005200,GO:0005524,GO:0005634,GO:0005737,GO:0005829,GO:0005885,GO:0005903,GO:0005911,GO:0005925,GO:0007163,GO:0008356,GO:0015629,GO:0016020,GO:0016344,GO:0030027,GO:0033206,GO:0034314,GO:0035861,GO:0038096,GO:0045944,GO:0048013,GO:0051653,GO:0060271,GO:0061024,GO:0070062,GO:0070358,GO:0071346	actin binding|structural constituent of cytoskeleton|ATP binding|nucleus|cytoplasm|cytosol|Arp2/3 protein complex|brush border|cell-cell junction|focal adhesion|establishment or maintenance of cell polarity|asymmetric cell division|actin cytoskeleton|membrane|meiotic chromosome movement towards spindle pole|lamellipodium|meiotic cytokinesis|Arp2/3 complex-mediated actin nucleation|site of double-…	oas04530	Tight junction
ACVR1C	2.48484	0	4.96969	27.2683	4.76915	0.00900702	0.0123953	Up	0.0338421	0.0397132	0.0113237	0	0	0	GeneID:101111867	activin A receptor type 1C	GO:0002021,GO:0004674,GO:0005024,GO:0005025,GO:0005524,GO:0005886,GO:0005887,GO:0006468,GO:0007179,GO:0007389,GO:0009749,GO:0016361,GO:0019838,GO:0019915,GO:0030154,GO:0030262,GO:0032868,GO:0032924,GO:0038092,GO:0038100,GO:0043235,GO:0043280,GO:0046332,GO:0046676,GO:0046872,GO:0048179,GO:0048185,GO:1901164,GO:1901383	response to dietary excess|protein serine/threonine kinase activity|transforming growth factor beta-activated receptor activity|transforming growth factor beta receptor activity, type I|ATP binding|plasma membrane|integral component of plasma membrane|protein phosphorylation|transforming growth factor beta receptor signaling pathway|pattern specification process|response to glucose|activin recept…	oas04060,oas04350,oas04550	Cytokine-cytokine receptor interaction|TGF-beta signaling pathway|Signaling pathways regulating pluripotency of stem cells
ACVR2A	907.491	245.515	1569.47	6.39161	2.67618	6.76641e-141	3.28857e-139	Up	28.9807	27.2723	26.7968	4.17147	4.21142	3.89681	GeneID:443304	activin A receptor type 2A	GO:0001702,GO:0005024,GO:0005026,GO:0005524,GO:0005737,GO:0005887,GO:0007179,GO:0007283,GO:0007368,GO:0007389,GO:0007498,GO:0009952,GO:0009986,GO:0010862,GO:0015026,GO:0017002,GO:0019838,GO:0030165,GO:0030501,GO:0030509,GO:0030510,GO:0032924,GO:0032927,GO:0034673,GO:0034711,GO:0034713,GO:0042713,GO:0043084,GO:0043235,GO:0043621,GO:0045648,GO:0045669,GO:0045944,GO:0046332,GO:0046872,GO:0048179,GO:…	gastrulation with mouth forming second|transforming growth factor beta-activated receptor activity|transforming growth factor beta receptor activity, type II|ATP binding|cytoplasm|integral component of plasma membrane|transforming growth factor beta receptor signaling pathway|spermatogenesis|determination of left/right symmetry|pattern specification process|mesoderm development|anterior/posterior…	oas04060,oas04350,oas04550,oas05418	Cytokine-cytokine receptor interaction|TGF-beta signaling pathway|Signaling pathways regulating pluripotency of stem cells|Fluid shear stress and atherosclerosis
ACY1	486.991	669.043	304.939	0.455939	-1.13309	1.10246e-14	2.59732e-14	Down	5.86037	5.1444	5.41922	10.3281	10.3409	13.2827	GeneID:101113801	aminoacylase 1	GO:0004046,GO:0005737,GO:0006520,GO:0008237,GO:0046872	aminoacylase activity|cytoplasm|cellular amino acid metabolic process|metallopeptidase activity|metal ion binding	oas00220	Arginine biosynthesis
ACYP1	67.0692	40.2217	93.9168	2.33398	1.22279	3.61473e-05	5.8022e-05	Up	2.2513	2.85154	2.81787	1.34483	0.913635	0.950939	GeneID:101109618	acylphosphatase 1	GO:0003998	acylphosphatase activity	oas00620	Pyruvate metabolism
ADA	74.766	111.501	38.0307	0.341051	-1.55194	6.45131e-08	1.17624e-07	Down	0.526849	0.777229	0.722771	1.68281	2.17718	1.75249	GeneID:101106352	adenosine deaminase			oas00230,oas05340	Purine metabolism|Primary immunodeficiency
ADAL	150.639	78.3809	222.896	2.84171	1.50676	2.69291e-11	5.61077e-11	Up	2.77743	1.93976	2.36719	0.725889	0.974517	0.657421	GeneID:101106885	adenosine deaminase like	GO:0004000,GO:0006154,GO:0009117,GO:0046103,GO:0046872	adenosine deaminase activity|adenosine catabolic process|nucleotide metabolic process|inosine biosynthetic process|metal ion binding
ADAM10	2644.63	853.068	4436.19	5.20179	2.37901	6.71017e-146	3.52795e-144	Up	26.3562	25.0052	25.482	4.84934	4.13007	4.96631	GeneID:101116733	ADAM metallopeptidase domain 10	GO:0000139,GO:0001701,GO:0004175,GO:0004222,GO:0005634,GO:0005737,GO:0005794,GO:0005798,GO:0006468,GO:0006509,GO:0007162,GO:0007219,GO:0008237,GO:0008284,GO:0009986,GO:0010820,GO:0014069,GO:0016021,GO:0016485,GO:0017124,GO:0019901,GO:0030307,GO:0034612,GO:0042117,GO:0042803,GO:0046872,GO:0051088,GO:0051089,GO:0097038,GO:0097197,GO:0098696,GO:0098978,GO:0099173	Golgi membrane|in utero embryonic development|endopeptidase activity|metalloendopeptidase activity|nucleus|cytoplasm|Golgi apparatus|Golgi-associated vesicle|protein phosphorylation|membrane protein ectodomain proteolysis|negative regulation of cell adhesion|Notch signaling pathway|metallopeptidase activity|positive regulation of cell proliferation|cell surface|positive regulation of T cell chemo…	oas05010	Alzheimer disease
ADAM11	37.9935	56.1366	19.8504	0.353586	-1.49987	9.30091e-05	0.000145932	Down	0.157336	0.103475	0.103265	0.321508	0.329639	0.322066	GeneID:101117948	ADAM metallopeptidase domain 11	GO:0004222,GO:0016021	metalloendopeptidase activity|integral component of membrane
ADAM9	3215	1326.32	5103.68	3.84748	1.94391	8.32098e-108	2.2121e-106	Up	32.6437	33.2771	32.8001	7.68364	9.18148	7.38788	GeneID:101115001	ADAM metallopeptidase domain 9
ADAMTS1	4923.17	2212.26	7634.09	3.45056	1.78683	1.72272e-106	4.48701e-105	Up	41.7905	41.1813	41.3783	10.8368	12.6948	10.529	GeneID:100415773	ADAM metallopeptidase with thrombospondin type 1 motif 1
ADAMTS12	37.115	24.2667	49.9633	2.05438	1.0387	0.0102722	0.0140734	Up	0.187015	0.210238	0.15828	0.114807	0.0929877	0.0487905	GeneID:101118642	ADAM metallopeptidase with thrombospondin type 1 motif 12	GO:0004222,GO:0007160,GO:0016477,GO:0030167,GO:0032331,GO:0046872,GO:0050727,GO:0051603,GO:0062023,GO:0071347,GO:0071356,GO:0071773,GO:1901509,GO:1902203,GO:1902548,GO:2001113	metalloendopeptidase activity|cell-matrix adhesion|cell migration|proteoglycan catabolic process|negative regulation of chondrocyte differentiation|metal ion binding|regulation of inflammatory response|proteolysis involved in cellular protein catabolic process|collagen-containing extracellular matrix|cellular response to interleukin-1|cellular response to tumor necrosis factor|cellular response t…
ADAMTS15	44.5208	78.8023	10.2393	0.130138	-2.94189	7.14031e-11	1.46292e-10	Down	0.0378639	0.0296219	0.0633471	0.235496	0.264737	0.443821	GeneID:101120284	ADAM metallopeptidase with thrombospondin type 1 motif 15	GO:0004222,GO:0005615,GO:0008201,GO:0008270,GO:0009986,GO:0050840,GO:0062023	metalloendopeptidase activity|extracellular space|heparin binding|zinc ion binding|cell surface|extracellular matrix binding|collagen-containing extracellular matrix
ADAMTS17	75.4837	48.4141	102.553	2.11659	1.08174	0.000147232	0.000228173	Up	0.505268	0.434377	0.403154	0.172081	0.25958	0.168276	GeneID:101110624	ADAM metallopeptidase with thrombospondin type 1 motif 17	GO:0003676,GO:0004222,GO:0005576,GO:0046872	nucleic acid binding|metalloendopeptidase activity|extracellular region|metal ion binding
ADAMTS20	58.6981	25.7742	91.6221	3.55626	1.83036	3.3652e-08	6.2028e-08	Up	0.294353	0.277759	0.271105	0.0489434	0.0969017	0.0778685	GeneID:101115444	ADAM metallopeptidase with thrombospondin type 1 motif 20	GO:0004175,GO:0004222,GO:0005615,GO:0006508,GO:0008270,GO:0009967,GO:0030198,GO:0043066,GO:0045636,GO:0048070	endopeptidase activity|metalloendopeptidase activity|extracellular space|proteolysis|zinc ion binding|positive regulation of signal transduction|extracellular matrix organization|negative regulation of apoptotic process|positive regulation of melanocyte differentiation|regulation of developmental pigmentation
ADAMTS3	450.177	177.938	722.416	4.06273	2.02245	1.96096e-50	1.53311e-49	Up	3.74008	4.05741	3.69641	0.90078	0.803036	0.967152	GeneID:101102903	ADAM metallopeptidase with thrombospondin type 1 motif 3	GO:0004175,GO:0004222,GO:0005576,GO:0005615,GO:0008201,GO:0008270,GO:0010573,GO:0016485,GO:0030199,GO:0030574,GO:0031012,GO:0032964,GO:0070062,GO:0097435,GO:1900748	endopeptidase activity|metalloendopeptidase activity|extracellular region|extracellular space|heparin binding|zinc ion binding|vascular endothelial growth factor production|protein processing|collagen fibril organization|collagen catabolic process|extracellular matrix|collagen biosynthetic process|extracellular exosome|supramolecular fiber organization|positive regulation of vascular endothelial …
ADAMTS5	227.743	67.2285	388.258	5.78379	2.53201	9.98291e-40	5.55204e-39	Up	1.81083	1.7658	1.85011	0.222949	0.315911	0.345951	GeneID:101110635	ADAM metallopeptidase with thrombospondin type 1 motif 5	GO:0004222,GO:0005178,GO:0005576,GO:0005615,GO:0005788,GO:0006508,GO:0008201,GO:0008237,GO:0008270,GO:0022617,GO:0031012,GO:0042742,GO:0044691,GO:0050840,GO:0062023,GO:0120163	metalloendopeptidase activity|integrin binding|extracellular region|extracellular space|endoplasmic reticulum lumen|proteolysis|heparin binding|metallopeptidase activity|zinc ion binding|extracellular matrix disassembly|extracellular matrix|defense response to bacterium|tooth eruption|extracellular matrix binding|collagen-containing extracellular matrix|negative regulation of cold-induced thermog…
ADAMTS6	456.9	82.9945	830.806	10.0192	3.32469	2.62488e-101	6.22881e-100	Up	3.01112	2.58842	2.75629	0.289454	0.21802	0.280501	GeneID:101103840	ADAM metallopeptidase with thrombospondin type 1 motif 6	GO:0003279,GO:0004222,GO:0005576,GO:0008237,GO:0035904,GO:0046872,GO:0060976	cardiac septum development|metalloendopeptidase activity|extracellular region|metallopeptidase activity|aorta development|metal ion binding|coronary vasculature development
ADAMTS9	7457.58	4638.02	10277.1	2.21576	1.1478	1.33426e-52	1.11003e-51	Up	39.4	37.9527	36.8972	15.9343	17.6673	15.1398	GeneID:101119080	ADAM metallopeptidase with thrombospondin type 1 motif 9	GO:0003179,GO:0003229,GO:0004222,GO:0005615,GO:0005783,GO:0006508,GO:0006516,GO:0007275,GO:0008237,GO:0008270,GO:0009617,GO:0009986,GO:0010596,GO:0015031,GO:0016192,GO:0030198,GO:0031012,GO:0035909,GO:0043231,GO:0045636,GO:0090673,GO:1903671	heart valve morphogenesis|ventricular cardiac muscle tissue development|metalloendopeptidase activity|extracellular space|endoplasmic reticulum|proteolysis|glycoprotein catabolic process|multicellular organism development|metallopeptidase activity|zinc ion binding|response to bacterium|cell surface|negative regulation of endothelial cell migration|protein transport|vesicle-mediated transport|extr…
ADAP1	1628.24	2199.98	1056.5	0.480302	-1.05799	4.19895e-28	1.57773e-27	Down	9.07915	9.00881	10.0023	17.5518	17.8197	19.7978	GeneID:114110560	ArfGAP with dual PH domains 1	GO:0005096,GO:0005547,GO:0005634,GO:0005737,GO:0005829,GO:0005886,GO:0007166,GO:0043087,GO:0043533,GO:0046872,GO:1902936	GTPase activator activity|phosphatidylinositol-3,4,5-trisphosphate binding|nucleus|cytoplasm|cytosol|plasma membrane|cell surface receptor signaling pathway|regulation of GTPase activity|inositol 1,3,4,5 tetrakisphosphate binding|metal ion binding|phosphatidylinositol bisphosphate binding
ADAT1	109.08	59.3577	158.803	2.67422	1.41912	3.74088e-09	7.16998e-09	Up	0.932225	0.904964	0.77256	0.380516	0.264699	0.278156	GeneID:101118042	adenosine deaminase tRNA specific 1	GO:0003723,GO:0008033,GO:0008251,GO:0046872	RNA binding|tRNA processing|tRNA-specific adenosine deaminase activity|metal ion binding
ADCK1	145.376	221.624	69.1271	0.311854	-1.68106	4.98437e-16	1.23587e-15	Down	0.912401	0.711244	0.767048	2.60773	2.43152	2.2112	GeneID:101116318	aarF domain containing kinase 1	GO:0004674,GO:0005524,GO:0005576	protein serine/threonine kinase activity|ATP binding|extracellular region
ADCK2	236.361	327.237	145.485	0.444651	-1.16925	2.26205e-13	5.07652e-13	Down	1.36851	1.30003	1.52636	2.96639	2.99902	2.94444	GeneID:101106933	aarF domain containing kinase 2	GO:0004674,GO:0005524,GO:0016021	protein serine/threonine kinase activity|ATP binding|integral component of membrane
ADCY4	13.5398	7.2427	19.8369	2.73631	1.45223	0.0313561	0.0410886	Up	0.0629933	0.16474	0.15176	0.0298823	0.0650794	0.0359209	GeneID:101119139	adenylate cyclase 4	GO:0003091,GO:0004016,GO:0005080,GO:0005524,GO:0005737,GO:0005886,GO:0005887,GO:0006171,GO:0007186,GO:0007188,GO:0007189,GO:0007193,GO:0016020,GO:0030425,GO:0046872,GO:0071377	renal water homeostasis|adenylate cyclase activity|protein kinase C binding|ATP binding|cytoplasm|plasma membrane|integral component of plasma membrane|cAMP biosynthetic process|G protein-coupled receptor signaling pathway|adenylate cyclase-modulating G protein-coupled receptor signaling pathway|adenylate cyclase-activating G protein-coupled receptor signaling pathway|adenylate cyclase-inhibiting…	oas00230,oas01522,oas04015,oas04020,oas04022,oas04024,oas04062,oas04072,oas04114,oas04211,oas04213,oas04261,oas04270,oas04371,oas04540,oas04611,oas04713,oas04714,oas04723,oas04724,oas04725,oas04727,oas04742,oas04750,oas04911,oas04912,oas04913,oas04914,oas04915,oas04916,oas04918,oas04921,oas04923,oas04925,oas04926,oas04927,oas04928,oas04934,oas04970,oas04971,oas04972,oas04976,oas05032,oas05163,oas…	Purine metabolism|Endocrine resistance|Rap1 signaling pathway|Calcium signaling pathway|cGMP-PKG signaling pathway|cAMP signaling pathway|Chemokine signaling pathway|Phospholipase D signaling pathway|Oocyte meiosis|Longevity regulating pathway|Longevity regulating pathway - multiple species|Adrenergic signaling in cardiomyocytes|Vascular smooth muscle contraction|Apelin signaling pathway|Gap junc…
ADD3	592.372	154.647	1030.1	6.65755	2.73499	2.52158e-101	5.99373e-100	Up	6.31127	6.00284	5.55992	0.857724	0.91358	0.766765	GeneID:101117808	adducin 3
ADGRG6	10.2245	2.61505	17.834	6.7854	2.76243	0.00156475	0.00228053	Up	0.130634	0.0437993	0.162354	0.0236073	0.0175273	0.00591207	GeneID:101116915	adhesion G protein-coupled receptor G6	GO:0004930,GO:0005518,GO:0005622,GO:0005886,GO:0005887,GO:0007005,GO:0007166,GO:0007186,GO:0007189,GO:0014037,GO:0016021,GO:0019933,GO:0022011,GO:0042552,GO:0043236,GO:0050840,GO:0060347	G protein-coupled receptor activity|collagen binding|intracellular|plasma membrane|integral component of plasma membrane|mitochondrion organization|cell surface receptor signaling pathway|G protein-coupled receptor signaling pathway|adenylate cyclase-activating G protein-coupled receptor signaling pathway|Schwann cell differentiation|integral component of membrane|cAMP-mediated signaling|myelinat…
ADGRG7	8.76826	0	17.5365	96.2382	6.58854	1.7574e-06	3.00652e-06	Up	0.147358	0.148219	0.116778	0	0	0	GeneID:101110721	adhesion G protein-coupled receptor G7	GO:0004930,GO:0005622,GO:0005887,GO:0007166,GO:0007186,GO:0007189,GO:0016021	G protein-coupled receptor activity|intracellular|integral component of plasma membrane|cell surface receptor signaling pathway|G protein-coupled receptor signaling pathway|adenylate cyclase-activating G protein-coupled receptor signaling pathway|integral component of membrane
ADGRL2	56.7146	21.1359	92.2932	4.36738	2.12677	5.95349e-10	1.17614e-09	Up	0.350942	0.287013	0.279848	0.0871281	0.046206	0.0654594	GeneID:101104103	adhesion G protein-coupled receptor L2	GO:0004930,GO:0007166,GO:0016021,GO:0030246	G protein-coupled receptor activity|cell surface receptor signaling pathway|integral component of membrane|carbohydrate binding
ADGRL4	12.2374	2.97254	21.5023	7.23579	2.85515	0.000119917	0.000186761	Up	0.123145	0.118479	0.10749	0.0152391	0.0150857	0.0152655	GeneID:101103604	adhesion G protein-coupled receptor L4	GO:0004930,GO:0005509,GO:0005886,GO:0005887,GO:0007166,GO:0007186,GO:0007189,GO:0016021,GO:0031410,GO:0046983	G protein-coupled receptor activity|calcium ion binding|plasma membrane|integral component of plasma membrane|cell surface receptor signaling pathway|G protein-coupled receptor signaling pathway|adenylate cyclase-activating G protein-coupled receptor signaling pathway|integral component of membrane|cytoplasmic vesicle|protein dimerization activity
ADH5	2217.45	1054.25	3380.65	3.20574	1.68066	7.48515e-39	4.03286e-38	Up	57.3949	62.3343	65.1025	21.9693	19.2264	13.4442	GeneID:101112223	alcohol dehydrogenase 5 (class III), chi polypeptide	GO:0001523,GO:0003016,GO:0004022,GO:0005504,GO:0005739,GO:0006069,GO:0008270,GO:0018119,GO:0018467,GO:0032496,GO:0042803,GO:0045777,GO:0046294,GO:0051409,GO:0051775,GO:0051903	retinoid metabolic process|respiratory system process|alcohol dehydrogenase (NAD) activity|fatty acid binding|mitochondrion|ethanol oxidation|zinc ion binding|peptidyl-cysteine S-nitrosylation|formaldehyde dehydrogenase activity|response to lipopolysaccharide|protein homodimerization activity|positive regulation of blood pressure|formaldehyde catabolic process|response to nitrosative stress|respo…	oas00010,oas00071,oas00350,oas00830,oas00980,oas00982,oas05204	Glycolysis / Gluconeogenesis|Fatty acid degradation|Tyrosine metabolism|Retinol metabolism|Metabolism of xenobiotics by cytochrome P450|Drug metabolism - cytochrome P450|Chemical carcinogenesis
ADI1	5260.17	7464.03	3056.31	0.409494	-1.28809	3.68909e-57	3.47832e-56	Down	56.6203	56.0898	59.9199	131.372	125.189	141.208	GeneID:101113992	acireductone dioxygenase 1	GO:0005506,GO:0005634,GO:0005737,GO:0005886,GO:0006555,GO:0010309,GO:0016491,GO:0019509	iron ion binding|nucleus|cytoplasm|plasma membrane|methionine metabolic process|acireductone dioxygenase [iron(II)-requiring] activity|oxidoreductase activity|L-methionine salvage from methylthioadenosine	oas00270	Cysteine and methionine metabolism
ADK	972.971	384.314	1561.63	4.06368	2.02279	1.41473e-89	2.7522e-88	Up	20.5366	21.527	21.9856	5.37445	4.64738	4.86981	GeneID:101122324	adenosine kinase	GO:0003723,GO:0004001,GO:0005524,GO:0005634,GO:0005654,GO:0005829,GO:0006166,GO:0006175,GO:0009156,GO:0043101,GO:0044209,GO:0046872	RNA binding|adenosine kinase activity|ATP binding|nucleus|nucleoplasm|cytosol|purine ribonucleoside salvage|dATP biosynthetic process|ribonucleoside monophosphate biosynthetic process|purine-containing compound salvage|AMP salvage|metal ion binding	oas00230	Purine metabolism
ADPRHL2	791.535	1179.28	403.787	0.342472	-1.54594	7.20648e-43	4.4585e-42	Down	3.38554	3.18324	3.4477	8.70502	8.93999	9.94809	GeneID:101116791	ADP-ribosylhydrolase like 2	GO:0004649,GO:0005634,GO:0005739,GO:0005759,GO:0046872	poly(ADP-ribose) glycohydrolase activity|nucleus|mitochondrion|mitochondrial matrix|metal ion binding
ADPRM	150.37	61.9153	238.825	3.85327	1.94608	6.94981e-21	2.05158e-20	Up	4.52882	4.33923	4.09686	1.08691	1.21047	0.884647	GeneID:101113772	ADP-ribose/CDP-alcohol diphosphatase, manganese dependent	GO:0046872,GO:0047631,GO:0047734	metal ion binding|ADP-ribose diphosphatase activity|CDP-glycerol diphosphatase activity	oas00230,oas00564	Purine metabolism|Glycerophospholipid metabolism
ADRA1B	438.268	590.108	286.427	0.485485	-1.0425	7.41228e-16	1.82539e-15	Down	4.42621	4.03016	4.10912	7.75369	8.02887	8.64696	GeneID:101114869	adrenoceptor alpha 1B	GO:0001994,GO:0004935,GO:0004937,GO:0005634,GO:0005737,GO:0005886,GO:0005887,GO:0005901,GO:0007186,GO:0007188,GO:0007200,GO:0007204,GO:0007267,GO:0007275,GO:0008283,GO:0031965,GO:0035556,GO:0042593,GO:0043410,GO:0045907,GO:0045987,GO:0046982,GO:0055117,GO:0071880	norepinephrine-epinephrine vasoconstriction involved in regulation of systemic arterial blood pressure|adrenergic receptor activity|alpha1-adrenergic receptor activity|nucleus|cytoplasm|plasma membrane|integral component of plasma membrane|caveola|G protein-coupled receptor signaling pathway|adenylate cyclase-modulating G protein-coupled receptor signaling pathway|phospholipase C-activating G pro…	oas04020,oas04022,oas04080,oas04261,oas04270,oas04970	Calcium signaling pathway|cGMP-PKG signaling pathway|Neuroactive ligand-receptor interaction|Adrenergic signaling in cardiomyocytes|Vascular smooth muscle contraction|Salivary secretion
ADRB3	18.7538	34.5296	2.9781	0.0861756	-3.53658	7.36449e-07	1.28192e-06	Down	0	0.0824214	0.0411273	0.466454	0.551547	0.337468	GeneID:100294559	adrenoceptor beta 3	GO:0004939,GO:0005622,GO:0005886,GO:0007189,GO:0007190,GO:0015052,GO:0016021,GO:0042803,GO:0043235,GO:0043410	beta-adrenergic receptor activity|intracellular|plasma membrane|adenylate cyclase-activating G protein-coupled receptor signaling pathway|activation of adenylate cyclase activity|beta3-adrenergic receptor activity|integral component of membrane|protein homodimerization activity|receptor complex|positive regulation of MAPK cascade	oas04020,oas04022,oas04080,oas04714,oas04923,oas04924,oas04970	Calcium signaling pathway|cGMP-PKG signaling pathway|Neuroactive ligand-receptor interaction|Thermogenesis|Regulation of lipolysis in adipocytes|Renin secretion|Salivary secretion
ADRM1	3008.05	4311.76	1704.33	0.395302	-1.33897	1.63432e-63	1.86405e-62	Down	30.8806	31.2293	33.9639	74.267	76.5909	78.5456	GeneID:101112587	adhesion regulating molecule 1	GO:0000502,GO:0002020,GO:0005654,GO:0005829,GO:0005886,GO:0006368,GO:0006511,GO:0008541,GO:0043130,GO:0043248,GO:0061133,GO:0070628	proteasome complex|protease binding|nucleoplasm|cytosol|plasma membrane|transcription elongation from RNA polymerase II promoter|ubiquitin-dependent protein catabolic process|proteasome regulatory particle, lid subcomplex|ubiquitin binding|proteasome assembly|endopeptidase activator activity|proteasome binding	oas03050,oas05169	Proteasome|Epstein-Barr virus infection
ADSS	166.727	47.0492	286.406	6.09734	2.60818	8.396e-29	3.24173e-28	Up	3.34731	2.73361	3.03354	0.547542	0.305509	0.558465	GeneID:101107881	adenylosuccinate synthase	GO:0000287,GO:0004019,GO:0005525,GO:0005737,GO:0005829,GO:0005886,GO:0044208,GO:0046040	magnesium ion binding|adenylosuccinate synthase activity|GTP binding|cytoplasm|cytosol|plasma membrane|'de novo' AMP biosynthetic process|IMP metabolic process	oas00230,oas00250	Purine metabolism|Alanine, aspartate and glutamate metabolism
ADSSL1	1125	1500.66	749.33	0.499419	-1.00168	3.55361e-23	1.13246e-22	Down	5.37236	5.1107	5.67103	9.5872	10.0847	10.8465	GeneID:101103928	adenylosuccinate synthase like 1	GO:0000287,GO:0004019,GO:0005525,GO:0005737,GO:0044208,GO:0046040	magnesium ion binding|adenylosuccinate synthase activity|GTP binding|cytoplasm|'de novo' AMP biosynthetic process|IMP metabolic process	oas00230,oas00250	Purine metabolism|Alanine, aspartate and glutamate metabolism
AEBP2	555.795	245.9	865.69	3.52029	1.8157	2.85511e-49	2.16166e-48	Up	4.87426	4.52159	4.23107	1.17704	1.3017	1.17908	GeneID:101121336	AE binding protein 2	GO:0000978,GO:0001078,GO:0003714,GO:0006325,GO:0035098,GO:0046872	RNA polymerase II proximal promoter sequence-specific DNA binding|proximal promoter DNA-binding transcription repressor activity, RNA polymerase II-specific|transcription corepressor activity|chromatin organization|ESC/E(Z) complex|metal ion binding
AEN	3357.73	4764.91	1950.55	0.409377	-1.2885	2.33119e-56	2.14509e-55	Down	14.199	14.7029	13.7823	31.8366	31.9973	34.5729	GeneID:101116260	apoptosis enhancing nuclease	GO:0003676,GO:0004527,GO:0005654,GO:0005730,GO:0010212,GO:0042771	nucleic acid binding|exonuclease activity|nucleoplasm|nucleolus|response to ionizing radiation|intrinsic apoptotic signaling pathway in response to DNA damage by p53 class mediator
AFF4	2872.56	726.085	5019.03	6.91366	2.78945	9.61771e-244	3.57956e-241	Up	11.9078	11.07	11.2689	1.63709	1.46215	1.58007	GeneID:101121933	AF4/FMR2 family member 4
AFG1L	43.7617	26.3599	61.1636	2.31895	1.21347	0.000797397	0.00118226	Up	1.04586	0.731809	1.03463	0.345132	0.469781	0.331326	GeneID:101116838	AFG1 like ATPase	GO:0005524,GO:0005737,GO:0005739,GO:0006123,GO:0007005,GO:0016887,GO:0031966,GO:0035694	ATP binding|cytoplasm|mitochondrion|mitochondrial electron transport, cytochrome c to oxygen|mitochondrion organization|ATPase activity|mitochondrial membrane|mitochondrial protein catabolic process
AFTPH	408.235	159.092	657.377	4.12891	2.04576	4.26663e-45	2.86529e-44	Up	4.0426	4.40508	4.72771	1.01525	1.15393	0.84751	GeneID:101114001	aftiphilin	GO:0005634,GO:0005794,GO:0005829,GO:0015031,GO:0030121,GO:0030276,GO:0043231,GO:0046907	nucleus|Golgi apparatus|cytosol|protein transport|AP-1 adaptor complex|clathrin binding|intracellular membrane-bounded organelle|intracellular transport
AGA	505.037	314.412	695.662	2.21183	1.14524	1.17315e-17	3.07358e-17	Up	8.9726	8.8502	10.4028	4.66867	3.89326	3.50757	GeneID:101106396	aspartylglucosaminidase	GO:0003948,GO:0005576,GO:0005615,GO:0005737,GO:0005764,GO:0005783,GO:0006517,GO:0008233,GO:0016787,GO:0035578,GO:0043312,GO:0043621,GO:0051604	N4-(beta-N-acetylglucosaminyl)-L-asparaginase activity|extracellular region|extracellular space|cytoplasm|lysosome|endoplasmic reticulum|protein deglycosylation|peptidase activity|hydrolase activity|azurophil granule lumen|neutrophil degranulation|protein self-association|protein maturation	oas00511,oas04142	Other glycan degradation|Lysosome
AGFG2	951.014	1325.87	576.158	0.434639	-1.20211	7.58779e-27	2.73203e-26	Down	5.33458	5.48686	5.36421	11.0713	10.9946	13.0533	GeneID:101104547	ArfGAP with FG repeats 2	GO:0005096,GO:0016020,GO:0046872	GTPase activator activity|membrane|metal ion binding
AGGF1	1012.19	325.915	1698.47	5.21389	2.38236	6.26529e-121	2.15073e-119	Up	8.17072	8.22338	8.7105	1.51618	1.43686	1.5929	GeneID:100037685	angiogenic factor with G-patch and FHA domains 1	GO:0001525,GO:0001570,GO:0001938,GO:0003676,GO:0005576,GO:0005737,GO:0007155,GO:0045766,GO:0048471	angiogenesis|vasculogenesis|positive regulation of endothelial cell proliferation|nucleic acid binding|extracellular region|cytoplasm|cell adhesion|positive regulation of angiogenesis|perinuclear region of cytoplasm
AGL	615.437	103.171	1127.7	10.9369	3.45114	3.62748e-16	9.04344e-16	Up	3.84583	3.87819	3.47904	0.332548	0.163063	0.466998	GeneID:101111501	amylo-alpha-1, 6-glucosidase, 4-alpha-glucanotransferase	GO:0004134,GO:0004135,GO:0005737,GO:0005978,GO:0005980,GO:0102500	4-alpha-glucanotransferase activity|amylo-alpha-1,6-glucosidase activity|cytoplasm|glycogen biosynthetic process|glycogen catabolic process|beta-maltose 4-alpha-glucanotransferase activity	oas00500	Starch and sucrose metabolism
AGO3	1133.28	80.5484	2186.01	27.2017	4.76562	1.16331e-219	2.49284e-217	Up	3.69527	3.38588	3.3569	0.135932	0.0798514	0.146643	GeneID:101111326	argonaute RISC catalytic component 3	GO:0000794,GO:0000932,GO:0003723,GO:0003725,GO:0003727,GO:0004521,GO:0005654,GO:0005737,GO:0005829,GO:0006402,GO:0007223,GO:0010501,GO:0010628,GO:0010629,GO:0016020,GO:0016442,GO:0031054,GO:0035068,GO:0035194,GO:0035196,GO:0035198,GO:0035278,GO:0035280,GO:0036464,GO:0045652,GO:0046872,GO:0070578,GO:0072091,GO:0090624,GO:1901224	condensed nuclear chromosome|P-body|RNA binding|double-stranded RNA binding|single-stranded RNA binding|endoribonuclease activity|nucleoplasm|cytoplasm|cytosol|mRNA catabolic process|Wnt signaling pathway, calcium modulating pathway|RNA secondary structure unwinding|positive regulation of gene expression|negative regulation of gene expression|membrane|RISC complex|pre-miRNA processing|micro-ribon…
AGO4	133.537	83.1237	183.95	2.20998	1.14403	1.35182e-06	2.32645e-06	Up	0.865861	0.786775	0.680213	0.357165	0.412499	0.230573	GeneID:101116530	argonaute RISC catalytic component 4	GO:0000932,GO:0003725,GO:0003727,GO:0005654,GO:0005737,GO:0005829,GO:0006402,GO:0007130,GO:0007140,GO:0007223,GO:0008584,GO:0010501,GO:0010586,GO:0010628,GO:0010629,GO:0016020,GO:0016442,GO:0016604,GO:0022604,GO:0031054,GO:0035068,GO:0035194,GO:0035196,GO:0035198,GO:0035278,GO:0035280,GO:0043066,GO:0045652,GO:0070578	P-body|double-stranded RNA binding|single-stranded RNA binding|nucleoplasm|cytoplasm|cytosol|mRNA catabolic process|synaptonemal complex assembly|male meiotic nuclear division|Wnt signaling pathway, calcium modulating pathway|male gonad development|RNA secondary structure unwinding|miRNA metabolic process|positive regulation of gene expression|negative regulation of gene expression|membrane|RISC …
AGPAT2	1753.49	2662.53	844.452	0.317206	-1.65651	5.47705e-50	4.22136e-49	Down	9.66954	9.98298	11.5134	28.1218	29.8836	34.5977	GeneID:101114511	1-acylglycerol-3-phosphate O-acyltransferase 2	GO:0001819,GO:0001961,GO:0003841,GO:0005783,GO:0005789,GO:0005886,GO:0006644,GO:0006654,GO:0008544,GO:0016021,GO:0016024,GO:0035579,GO:0042493,GO:0043312	positive regulation of cytokine production|positive regulation of cytokine-mediated signaling pathway|1-acylglycerol-3-phosphate O-acyltransferase activity|endoplasmic reticulum|endoplasmic reticulum membrane|plasma membrane|phospholipid metabolic process|phosphatidic acid biosynthetic process|epidermis development|integral component of membrane|CDP-diacylglycerol biosynthetic process|specific gr…	oas00561,oas00564,oas04072,oas04975	Glycerolipid metabolism|Glycerophospholipid metabolism|Phospholipase D signaling pathway|Fat digestion and absorption
AGPAT5	931.717	501.598	1361.84	2.7136	1.44021	3.43267e-32	1.49058e-31	Up	9.62705	10.685	10.8603	3.9369	4.05317	2.88251	GeneID:101103870	1-acylglycerol-3-phosphate O-acyltransferase 5	GO:0002244,GO:0003841,GO:0005635,GO:0005739,GO:0005741,GO:0005789,GO:0006639,GO:0006654,GO:0008654,GO:0016021,GO:0016024,GO:0016746	hematopoietic progenitor cell differentiation|1-acylglycerol-3-phosphate O-acyltransferase activity|nuclear envelope|mitochondrion|mitochondrial outer membrane|endoplasmic reticulum membrane|acylglycerol metabolic process|phosphatidic acid biosynthetic process|phospholipid biosynthetic process|integral component of membrane|CDP-diacylglycerol biosynthetic process|transferase activity, transferrin…	oas00561,oas00564,oas04072	Glycerolipid metabolism|Glycerophospholipid metabolism|Phospholipase D signaling pathway
AGPS	1016.44	237.19	1795.69	7.57714	2.92165	2.78017e-156	1.72456e-154	Up	6.44342	6.71578	6.39231	0.762868	0.77879	0.893831	GeneID:101104553	alkylglycerone phosphate synthase	GO:0005730,GO:0005739,GO:0005777,GO:0005778,GO:0005782,GO:0005829,GO:0006625,GO:0008609,GO:0008610,GO:0008611,GO:0016020,GO:0016491,GO:0071949	nucleolus|mitochondrion|peroxisome|peroxisomal membrane|peroxisomal matrix|cytosol|protein targeting to peroxisome|alkylglycerone-phosphate synthase activity|lipid biosynthetic process|ether lipid biosynthetic process|membrane|oxidoreductase activity|FAD binding	oas00565,oas04146	Ether lipid metabolism|Peroxisome
AGTPBP1	163.384	33.3679	293.399	8.79696	3.13701	5.27798e-43	3.27972e-42	Up	1.83081	1.84151	1.72217	0.235814	0.148036	0.195892	GeneID:101115757	ATP/GTP binding protein 1	GO:0001754,GO:0004181,GO:0005634,GO:0005730,GO:0005737,GO:0005739,GO:0005829,GO:0007005,GO:0008270,GO:0015631,GO:0021702,GO:0021772,GO:0035609,GO:0035610,GO:0043231,GO:0050905	eye photoreceptor cell differentiation|metallocarboxypeptidase activity|nucleus|nucleolus|cytoplasm|mitochondrion|cytosol|mitochondrion organization|zinc ion binding|tubulin binding|cerebellar Purkinje cell differentiation|olfactory bulb development|C-terminal protein deglutamylation|protein side chain deglutamylation|intracellular membrane-bounded organelle|neuromuscular process
AHCTF1	1086.08	167.745	2004.42	11.9508	3.57904	3.08954e-188	3.58159e-186	Up	6.91857	7.01018	6.68961	0.64996	0.445934	0.535052	GeneID:101114886	AT-hook containing transcription factor 1	GO:0000777,GO:0000981,GO:0003677,GO:0005634,GO:0005643,GO:0005654,GO:0005829,GO:0007049,GO:0015031,GO:0016363,GO:0031965,GO:0032465,GO:0051028,GO:0051292,GO:0051301,GO:0070062	condensed chromosome kinetochore|DNA-binding transcription factor activity, RNA polymerase II-specific|DNA binding|nucleus|nuclear pore|nucleoplasm|cytosol|cell cycle|protein transport|nuclear matrix|nuclear membrane|regulation of cytokinesis|mRNA transport|nuclear pore complex assembly|cell division|extracellular exosome
AHCY	25283.4	36689.5	13877.3	0.37824	-1.40263	1.03559e-78	1.65496e-77	Down	167.434	177.246	178.96	414.708	431.539	459.959	GeneID:101112245	adenosylhomocysteinase	GO:0004013,GO:0005829,GO:0006730,GO:0019510,GO:0042470,GO:0051287	adenosylhomocysteinase activity|cytosol|one-carbon metabolic process|S-adenosylhomocysteine catabolic process|melanosome|NAD binding	oas00270	Cysteine and methionine metabolism
AHCYL2	623.515	410.372	836.658	2.03806	1.0272	1.10628e-19	3.13174e-19	Up	4.20318	4.19201	4.48927	2.06611	2.15021	1.76093	GeneID:101114101	adenosylhomocysteinase like 2	GO:0005783,GO:0005829,GO:0006730,GO:0016787,GO:0043005	endoplasmic reticulum|cytosol|one-carbon metabolic process|hydrolase activity|neuron projection	oas00270	Cysteine and methionine metabolism
AHI1	432.79	74.4841	791.096	10.6375	3.41109	1.15632e-100	2.71209e-99	Up	4.01126	3.69929	3.88586	0.371396	0.2678	0.390412	GeneID:101120502	Abelson helper integration site 1	GO:0001738,GO:0001947,GO:0002092,GO:0005813,GO:0005814,GO:0005829,GO:0005911,GO:0005912,GO:0005929,GO:0007169,GO:0007417,GO:0010842,GO:0016192,GO:0030862,GO:0030902,GO:0034613,GO:0035844,GO:0035845,GO:0036038,GO:0036064,GO:0039008,GO:0039023,GO:0042802,GO:0043066,GO:0045944,GO:0050795,GO:0060271,GO:0065001,GO:0070121,GO:0070986,GO:0071599,GO:0097711,GO:0097730	morphogenesis of a polarized epithelium|heart looping|positive regulation of receptor internalization|centrosome|centriole|cytosol|cell-cell junction|adherens junction|cilium|transmembrane receptor protein tyrosine kinase signaling pathway|central nervous system development|retina layer formation|vesicle-mediated transport|positive regulation of polarized epithelial cell differentiation|hindbrain…
AHR	526.014	164.53	887.499	5.39141	2.43066	1.67878e-79	2.72908e-78	Up	5.12885	5.01491	4.6678	0.955441	0.863131	0.779277	GeneID:443467	aryl hydrocarbon receptor	GO:0004874,GO:0005634,GO:0005737,GO:0006805,GO:0007049,GO:0032922,GO:0034751,GO:0045892,GO:0045893,GO:0046983,GO:0070888	aryl hydrocarbon receptor activity|nucleus|cytoplasm|xenobiotic metabolic process|cell cycle|circadian regulation of gene expression|aryl hydrocarbon receptor complex|negative regulation of transcription, DNA-templated|positive regulation of transcription, DNA-templated|protein dimerization activity|E-box binding	oas04659,oas04934	Th17 cell differentiation|Cushing syndrome
AHSA2P	792.627	237.63	1347.62	5.67634	2.50496	4.01739e-98	9.14943e-97	Up	20.2662	19.0876	20.5494	3.0725	3.13792	3.74632	GeneID:101119030	activator of HSP90 ATPase homolog 2, pseudogene	GO:0001671,GO:0051087	ATPase activator activity|chaperone binding
AIDA	1248.05	744.971	1751.14	2.35021	1.23279	7.89568e-30	3.16431e-29	Up	16.4103	19.073	15.2736	6.837	7.36064	6.22211	GeneID:101106862	axin interactor, dorsalization associated	GO:0005737,GO:0009953,GO:0019904,GO:0043496,GO:0043508,GO:0046329	cytoplasm|dorsal/ventral pattern formation|protein domain specific binding|regulation of protein homodimerization activity|negative regulation of JUN kinase activity|negative regulation of JNK cascade
AIFM2	1241.78	1686.94	796.621	0.472324	-1.08215	2.18267e-22	6.7741e-22	Down	11.6178	11.7307	12.6951	22.7804	22.089	27.0721	GeneID:101108883	apoptosis inducing factor mitochondria associated 2	GO:0003677,GO:0004174,GO:0005737,GO:0005739,GO:0005741,GO:0005811,GO:0005829,GO:0008637,GO:0016021,GO:0043065,GO:0050660	DNA binding|electron-transferring-flavoprotein dehydrogenase activity|cytoplasm|mitochondrion|mitochondrial outer membrane|lipid droplet|cytosol|apoptotic mitochondrial changes|integral component of membrane|positive regulation of apoptotic process|flavin adenine dinucleotide binding	oas04115	p53 signaling pathway
AIMP1	891.599	449.943	1333.26	2.96339	1.56725	3.02628e-18	8.12773e-18	Up	8.37944	8.14087	9.17663	3.68265	1.76611	2.74716	GeneID:101121350	aminoacyl tRNA synthetase complex interacting multifunctional protein 1	GO:0000049,GO:0001525,GO:0001937,GO:0005125,GO:0005615,GO:0005634,GO:0005783,GO:0005794,GO:0005829,GO:0006418,GO:0006915,GO:0006935,GO:0006954,GO:0007155,GO:0007165,GO:0007267,GO:0009611,GO:0009986,GO:0016020,GO:0017101,GO:0017102,GO:0042803,GO:0050900,GO:0051020,GO:0051607,GO:0070094	tRNA binding|angiogenesis|negative regulation of endothelial cell proliferation|cytokine activity|extracellular space|nucleus|endoplasmic reticulum|Golgi apparatus|cytosol|tRNA aminoacylation for protein translation|apoptotic process|chemotaxis|inflammatory response|cell adhesion|signal transduction|cell-cell signaling|response to wounding|cell surface|membrane|aminoacyl-tRNA synthetase multienzy…
AIMP2	1459.06	2135.36	782.763	0.366632	-1.44759	3.75612e-40	2.12152e-39	Down	16.8451	16.7691	17.8668	42.8646	39.7862	49.7383	GeneID:100302342	aminoacyl tRNA synthetase complex interacting multifunctional protein 2	GO:0005634,GO:0005829,GO:0006412,GO:0006915,GO:0008285,GO:0017101,GO:0031398,GO:0032947,GO:0060510,GO:0065003,GO:1903632	nucleus|cytosol|translation|apoptotic process|negative regulation of cell proliferation|aminoacyl-tRNA synthetase multienzyme complex|positive regulation of protein ubiquitination|protein-containing complex scaffold activity|type II pneumocyte differentiation|protein-containing complex assembly|positive regulation of aminoacyl-tRNA ligase activity
AIP	1531.25	2123.48	939.012	0.442238	-1.17711	7.09899e-38	3.7062e-37	Down	12.531	12.5123	12.1722	27.6329	24.4586	27.3704	GeneID:101119947	aryl hydrocarbon receptor interacting protein	GO:0003712,GO:0005737,GO:0006805	transcription coregulator activity|cytoplasm|xenobiotic metabolic process	oas04934	Cushing syndrome
AK1	2119.13	3066.08	1172.17	0.382347	-1.38705	1.12124e-44	7.43097e-44	Down	55.5311	50.3778	59.6209	129.703	131.064	147.579	GeneID:100302085	adenylate kinase 1	GO:0001520,GO:0004017,GO:0004550,GO:0005524,GO:0005829,GO:0005886,GO:0006165,GO:0006172,GO:0007050,GO:0009142,GO:0046033,GO:0046034	outer dense fiber|adenylate kinase activity|nucleoside diphosphate kinase activity|ATP binding|cytosol|plasma membrane|nucleoside diphosphate phosphorylation|ADP biosynthetic process|cell cycle arrest|nucleoside triphosphate biosynthetic process|AMP metabolic process|ATP metabolic process	oas00230,oas00730	Purine metabolism|Thiamine metabolism
AK4	1409.15	903.707	1914.58	2.11802	1.08272	3.79113e-31	1.59387e-30	Up	15.8713	15.6353	15.9564	7.28855	7.70644	6.19825	GeneID:101103031	adenylate kinase 4	GO:0004017,GO:0004550,GO:0005524,GO:0005525,GO:0005759,GO:0006165,GO:0006172,GO:0009142,GO:0046033,GO:0046034,GO:0046039,GO:0046899	adenylate kinase activity|nucleoside diphosphate kinase activity|ATP binding|GTP binding|mitochondrial matrix|nucleoside diphosphate phosphorylation|ADP biosynthetic process|nucleoside triphosphate biosynthetic process|AMP metabolic process|ATP metabolic process|GTP metabolic process|nucleoside triphosphate adenylate kinase activity	oas00230,oas00730	Purine metabolism|Thiamine metabolism
AK7	32.6916	19.749	45.6342	2.30825	1.2068	0.0030064	0.00428236	Up	0.54907	0.462111	0.539914	0.191361	0.273628	0.170394	GeneID:101121552	adenylate kinase 7	GO:0004017,GO:0004127,GO:0004550,GO:0005524,GO:0005829,GO:0006165,GO:0009142,GO:0015949,GO:0019206,GO:0030030,GO:0031514	adenylate kinase activity|cytidylate kinase activity|nucleoside diphosphate kinase activity|ATP binding|cytosol|nucleoside diphosphate phosphorylation|nucleoside triphosphate biosynthetic process|nucleobase-containing small molecule interconversion|nucleoside kinase activity|cell projection organization|motile cilium	oas00230,oas00730	Purine metabolism|Thiamine metabolism
AKAP1	1599.99	2204.4	995.576	0.45165	-1.14672	1.5381e-43	9.73306e-43	Down	6.73122	7.09264	6.75003	14.4595	14.122	14.4392	GeneID:101123647	A-kinase anchoring protein 1	GO:0003723,GO:0005739,GO:0005741,GO:0005829,GO:0007596,GO:0010738,GO:0016020,GO:0016021,GO:0034237	RNA binding|mitochondrion|mitochondrial outer membrane|cytosol|blood coagulation|regulation of protein kinase A signaling|membrane|integral component of membrane|protein kinase A regulatory subunit binding
AKAP11	2268.98	504.53	4033.43	7.9983	2.99969	8.17595e-173	6.84216e-171	Up	11.662	11.2221	11.2555	1.43499	1.1139	1.47992	GeneID:101108581	A-kinase anchoring protein 11	GO:0005730,GO:0005737,GO:0005777,GO:0005815,GO:0005829,GO:0005886,GO:0008157,GO:0010738,GO:0035556,GO:0051018	nucleolus|cytoplasm|peroxisome|microtubule organizing center|cytosol|plasma membrane|protein phosphatase 1 binding|regulation of protein kinase A signaling|intracellular signal transduction|protein kinase A binding
AKAP4	13.884	2.61556	25.1524	9.55639	3.25647	2.16952e-05	3.52603e-05	Up	0.125487	0.156514	0.100772	0.023811	0.00942856	0.00477047	GeneID:101102535	A-kinase anchoring protein 4	GO:0005737,GO:0005929,GO:0007178,GO:0008104,GO:0010738,GO:0030018,GO:0030317,GO:0031514,GO:0035686,GO:0044458,GO:0045184,GO:0048471,GO:0051018,GO:0097228	cytoplasm|cilium|transmembrane receptor protein serine/threonine kinase signaling pathway|protein localization|regulation of protein kinase A signaling|Z disc|flagellated sperm motility|motile cilium|sperm fibrous sheath|motile cilium assembly|establishment of protein localization|perinuclear region of cytoplasm|protein kinase A binding|sperm principal piece
AKAP5	10.4106	2.94164	17.8795	6.05037	2.59702	0.0050722	0.00712303	Up	0.0951808	0.172327	0.0764348	0.0481612	0	0.00603059	GeneID:101109277	A-kinase anchoring protein 5	GO:0005516,GO:0005622,GO:0005886,GO:0006605,GO:0007165,GO:0008179,GO:0014069,GO:0031698,GO:0032590,GO:0032947,GO:0034237,GO:0035254,GO:0043197,GO:0045762,GO:0050811,GO:0060076	calmodulin binding|intracellular|plasma membrane|protein targeting|signal transduction|adenylate cyclase binding|postsynaptic density|beta-2 adrenergic receptor binding|dendrite membrane|protein-containing complex scaffold activity|protein kinase A regulatory subunit binding|glutamate receptor binding|dendritic spine|positive regulation of adenylate cyclase activity|GABA receptor binding|excitato…
AKAP6	66.1963	34.4698	97.9229	2.84525	1.50855	4.1535e-07	7.3018e-07	Up	0.256305	0.262858	0.227013	0.0715198	0.0755201	0.100301	GeneID:101117111	A-kinase anchoring protein 6	GO:0001508,GO:0005635,GO:0005737,GO:0005901,GO:0006605,GO:0008179,GO:0010738,GO:0010880,GO:0014701,GO:0014704,GO:0016529,GO:0019933,GO:0030307,GO:0030315,GO:0031965,GO:0032516,GO:0032947,GO:0034237,GO:0034704,GO:0043495,GO:0044325,GO:0048471,GO:0051018,GO:0051281,GO:0060306,GO:0060316,GO:0061051,GO:0070886,GO:0071320,GO:0071345,GO:1901381,GO:1902261	action potential|nuclear envelope|cytoplasm|caveola|protein targeting|adenylate cyclase binding|regulation of protein kinase A signaling|regulation of release of sequestered calcium ion into cytosol by sarcoplasmic reticulum|junctional sarcoplasmic reticulum membrane|intercalated disc|sarcoplasmic reticulum|cAMP-mediated signaling|positive regulation of cell growth|T-tubule|nuclear membrane|posit…
AKAP9	1102.82	95.0319	2110.62	22.221	4.47385	3.82139e-26	1.34342e-25	Up	5.24572	4.75639	4.31995	0.233555	0.0987873	0.274371	GeneID:101109958	A-kinase anchoring protein 9
AKR1A1	6875.63	9428.47	4322.78	0.4585	-1.12501	3.08005e-43	1.9309e-42	Down	76.7482	79.4186	81.2571	160.023	153.074	175.409	GeneID:101121637	aldo-keto reductase family 1 member A1	GO:0004032,GO:0005829,GO:0008106,GO:0016324,GO:0016491,GO:0019853,GO:0042840,GO:0045202,GO:0046185,GO:0047939	alditol:NADP+ 1-oxidoreductase activity|cytosol|alcohol dehydrogenase (NADP+) activity|apical plasma membrane|oxidoreductase activity|L-ascorbic acid biosynthetic process|D-glucuronate catabolic process|synapse|aldehyde catabolic process|L-glucuronate reductase activity	oas00010,oas00040,oas00561	Glycolysis / Gluconeogenesis|Pentose and glucuronate interconversions|Glycerolipid metabolism
AKR7A2	954.207	1452.98	455.434	0.313507	-1.67343	5.87539e-33	2.61061e-32	Down	9.7383	8.04744	8.58702	23.4964	24.049	31.7035	GeneID:101109421	aldo-keto reductase family 7 member A2	GO:0004032,GO:0004033,GO:0005794,GO:0005829,GO:0005975,GO:0006081,GO:0006805,GO:0009055,GO:0019119,GO:0044597,GO:0044598,GO:0070062	alditol:NADP+ 1-oxidoreductase activity|aldo-keto reductase (NADP) activity|Golgi apparatus|cytosol|carbohydrate metabolic process|cellular aldehyde metabolic process|xenobiotic metabolic process|electron transfer activity|phenanthrene-9,10-epoxide hydrolase activity|daunorubicin metabolic process|doxorubicin metabolic process|extracellular exosome	oas00980	Metabolism of xenobiotics by cytochrome P450
AKT1	17782.5	25927.6	9637.44	0.371713	-1.42774	1.20249e-60	1.27297e-59	Down	101.592	104.253	110.449	253.889	253	295.414	GeneID:100294652	AKT serine/threonine kinase 1	GO:0001938,GO:0004674,GO:0005524,GO:0005634,GO:0005737,GO:0005886,GO:0005978,GO:0006006,GO:0006417,GO:0006468,GO:0006915,GO:0008643,GO:0010975,GO:0016310,GO:0018105,GO:0030334,GO:0035556,GO:0042981,GO:0043154,GO:0043491,GO:0060416,GO:0090201,GO:1990418	positive regulation of endothelial cell proliferation|protein serine/threonine kinase activity|ATP binding|nucleus|cytoplasm|plasma membrane|glycogen biosynthetic process|glucose metabolic process|regulation of translation|protein phosphorylation|apoptotic process|carbohydrate transport|regulation of neuron projection development|phosphorylation|peptidyl-serine phosphorylation|regulation of cell …	oas01521,oas01522,oas01524,oas04010,oas04012,oas04014,oas04015,oas04022,oas04024,oas04062,oas04066,oas04068,oas04071,oas04072,oas04140,oas04150,oas04151,oas04152,oas04210,oas04211,oas04213,oas04218,oas04261,oas04370,oas04371,oas04380,oas04510,oas04550,oas04611,oas04620,oas04625,oas04630,oas04660,oas04662,oas04664,oas04666,oas04668,oas04722,oas04725,oas04728,oas04910,oas04914,oas04915,oas04917,oas…	EGFR tyrosine kinase inhibitor resistance|Endocrine resistance|Platinum drug resistance|MAPK signaling pathway|ErbB signaling pathway|Ras signaling pathway|Rap1 signaling pathway|cGMP-PKG signaling pathway|cAMP signaling pathway|Chemokine signaling pathway|HIF-1 signaling pathway|FoxO signaling pathway|Sphingolipid signaling pathway|Phospholipase D signaling pathway|Autophagy - animal|mTOR signal…
AKT1S1	2170.62	3072.76	1268.48	0.412857	-1.27629	4.0643e-42	2.45019e-41	Down	7.31601	8.11851	8.59084	17.927	17.4769	19.4947	GeneID:101109114	AKT1 substrate 1	GO:0005654,GO:0005737,GO:0005829,GO:0006469,GO:0031931,GO:0032007,GO:0038202,GO:0042981,GO:0043523,GO:0045792,GO:0048011,GO:1900034	nucleoplasm|cytoplasm|cytosol|negative regulation of protein kinase activity|TORC1 complex|negative regulation of TOR signaling|TORC1 signaling|regulation of apoptotic process|regulation of neuron apoptotic process|negative regulation of cell size|neurotrophin TRK receptor signaling pathway|regulation of cellular response to heat	oas04140,oas04150,oas04152,oas04211,oas04213,oas04714	Autophagy - animal|mTOR signaling pathway|AMPK signaling pathway|Longevity regulating pathway|Longevity regulating pathway - multiple species|Thermogenesis
AKT2	3325.72	4450.31	2201.13	0.494624	-1.0156	8.65777e-40	4.82835e-39	Down	9.62131	10.054	9.72427	17.9388	18.9245	19.2463	GeneID:101119242	AKT serine/threonine kinase 2			oas01521,oas01522,oas01524,oas04010,oas04012,oas04014,oas04015,oas04022,oas04024,oas04062,oas04066,oas04068,oas04071,oas04072,oas04140,oas04150,oas04151,oas04152,oas04210,oas04211,oas04213,oas04218,oas04261,oas04370,oas04371,oas04380,oas04510,oas04550,oas04611,oas04620,oas04625,oas04630,oas04660,oas04662,oas04664,oas04666,oas04668,oas04722,oas04725,oas04728,oas04910,oas04914,oas04915,oas04917,oas…	EGFR tyrosine kinase inhibitor resistance|Endocrine resistance|Platinum drug resistance|MAPK signaling pathway|ErbB signaling pathway|Ras signaling pathway|Rap1 signaling pathway|cGMP-PKG signaling pathway|cAMP signaling pathway|Chemokine signaling pathway|HIF-1 signaling pathway|FoxO signaling pathway|Sphingolipid signaling pathway|Phospholipase D signaling pathway|Autophagy - animal|mTOR signal…
AKT3	132.592	45.177	220.008	4.86737	2.28314	3.47213e-22	1.07172e-21	Up	1.22293	1.2567	1.05222	0.291317	0.188942	0.206288	GeneID:101118462	AKT serine/threonine kinase 3			oas01521,oas01522,oas01524,oas04010,oas04012,oas04014,oas04015,oas04022,oas04024,oas04062,oas04066,oas04068,oas04071,oas04072,oas04140,oas04150,oas04151,oas04152,oas04210,oas04211,oas04213,oas04218,oas04261,oas04370,oas04371,oas04380,oas04510,oas04550,oas04611,oas04620,oas04625,oas04630,oas04660,oas04662,oas04664,oas04666,oas04668,oas04722,oas04725,oas04728,oas04910,oas04914,oas04915,oas04917,oas…	EGFR tyrosine kinase inhibitor resistance|Endocrine resistance|Platinum drug resistance|MAPK signaling pathway|ErbB signaling pathway|Ras signaling pathway|Rap1 signaling pathway|cGMP-PKG signaling pathway|cAMP signaling pathway|Chemokine signaling pathway|HIF-1 signaling pathway|FoxO signaling pathway|Sphingolipid signaling pathway|Phospholipase D signaling pathway|Autophagy - animal|mTOR signal…
AKTIP	589.41	203.248	975.572	4.80458	2.26441	3.16871e-67	3.98711e-66	Up	10.1246	10.93	11.2365	2.04949	1.88541	2.40558	GeneID:101114547	AKT interacting protein	GO:0001934,GO:0005829,GO:0005886,GO:0006915,GO:0007032,GO:0007040,GO:0008333,GO:0015031,GO:0030897,GO:0032092,GO:0045022,GO:0070695	positive regulation of protein phosphorylation|cytosol|plasma membrane|apoptotic process|endosome organization|lysosome organization|endosome to lysosome transport|protein transport|HOPS complex|positive regulation of protein binding|early endosome to late endosome transport|FHF complex
ALAD	630.846	918.052	343.639	0.374385	-1.4174	2.21603e-30	9.0582e-30	Down	1.48342	1.30008	1.36133	3.52413	3.15997	3.76459	GeneID:101106393	aminolevulinate dehydratase	GO:0004655,GO:0005829,GO:0006782,GO:0006783,GO:0008270,GO:0042802,GO:0051260,GO:0071353,GO:1901799	porphobilinogen synthase activity|cytosol|protoporphyrinogen IX biosynthetic process|heme biosynthetic process|zinc ion binding|identical protein binding|protein homooligomerization|cellular response to interleukin-4|negative regulation of proteasomal protein catabolic process	oas00860	Porphyrin and chlorophyll metabolism
ALAS1	1689.36	2272.13	1106.59	0.48705	-1.03786	6.63538e-35	3.15761e-34	Down	13.3382	13.2833	13.6782	24.8648	27.2079	26.0603	GeneID:101112853	5'-aminolevulinate synthase 1	GO:0003870,GO:0005654,GO:0005759,GO:0005829,GO:0006782,GO:0030170,GO:0042802	5-aminolevulinate synthase activity|nucleoplasm|mitochondrial matrix|cytosol|protoporphyrinogen IX biosynthetic process|pyridoxal phosphate binding|identical protein binding	oas00260,oas00860	Glycine, serine and threonine metabolism|Porphyrin and chlorophyll metabolism
ALCAM	359.2	127.16	591.239	4.65075	2.21746	8.76128e-51	6.92239e-50	Up	3.15367	3.13918	3.49431	0.735066	0.589309	0.663744	GeneID:101114151	activated leukocyte cell adhesion molecule	GO:0001772,GO:0002250,GO:0005887,GO:0007155,GO:0007157,GO:0030424,GO:0030425,GO:0031226,GO:0031290,GO:0048846,GO:1990138	immunological synapse|adaptive immune response|integral component of plasma membrane|cell adhesion|heterophilic cell-cell adhesion via plasma membrane cell adhesion molecules|axon|dendrite|intrinsic component of plasma membrane|retinal ganglion cell axon guidance|axon extension involved in axon guidance|neuron projection extension	oas04514	Cell adhesion molecules (CAMs)
ALDH16A1	1607.73	2369.21	846.251	0.357228	-1.48508	5.79442e-58	5.61305e-57	Down	7.7265	7.70674	8.23722	19.5508	21.086	21.8893	GeneID:101111900	aldehyde dehydrogenase 16 family member A1	GO:0016620	oxidoreductase activity, acting on the aldehyde or oxo group of donors, NAD or NADP as acceptor
ALDH1A2	20.7784	30.6236	10.9332	0.35668	-1.4873	0.0110172	0.0150649	Down	0.126053	0.103017	0.0316333	0.343827	0.162784	0.187187	GeneID:101117509	aldehyde dehydrogenase 1 family member A2			oas00830	Retinol metabolism
ALDH1A3	71.5891	47.5885	95.5897	2.0094	1.00676	0.00038124	0.000576795	Up	0.715251	0.814302	0.749536	0.27591	0.420773	0.373498	GeneID:101109831	aldehyde dehydrogenase 1 family member A3	GO:0001758,GO:0002072,GO:0002138,GO:0004029,GO:0004030,GO:0005634,GO:0005737,GO:0005829,GO:0005886,GO:0007626,GO:0021768,GO:0031076,GO:0042472,GO:0042572,GO:0042573,GO:0042574,GO:0042803,GO:0043065,GO:0048048,GO:0050885,GO:0051289,GO:0060013,GO:0060166,GO:0060324,GO:0070062,GO:0070324,GO:0070384,GO:0070403	retinal dehydrogenase activity|optic cup morphogenesis involved in camera-type eye development|retinoic acid biosynthetic process|aldehyde dehydrogenase (NAD) activity|aldehyde dehydrogenase [NAD(P)+] activity|nucleus|cytoplasm|cytosol|plasma membrane|locomotory behavior|nucleus accumbens development|embryonic camera-type eye development|inner ear morphogenesis|retinol metabolic process|retinoic …	oas00010,oas00340,oas00350,oas00360,oas00410,oas00980,oas00982,oas05204	Glycolysis / Gluconeogenesis|Histidine metabolism|Tyrosine metabolism|Phenylalanine metabolism|beta-Alanine metabolism|Metabolism of xenobiotics by cytochrome P450|Drug metabolism - cytochrome P450|Chemical carcinogenesis
ALDH1L2	7250.98	2977.74	11524.2	3.86998	1.95233	1.01999e-179	9.74711e-178	Up	45.6286	43.9463	44.543	10.8152	11.5568	10.3781	GeneID:101114182	aldehyde dehydrogenase 1 family member L2	GO:0004029,GO:0005634,GO:0005739,GO:0005759,GO:0006730,GO:0009058,GO:0009258,GO:0016155,GO:0016742,GO:0046655,GO:0070062	aldehyde dehydrogenase (NAD) activity|nucleus|mitochondrion|mitochondrial matrix|one-carbon metabolic process|biosynthetic process|10-formyltetrahydrofolate catabolic process|formyltetrahydrofolate dehydrogenase activity|hydroxymethyl-, formyl- and related transferase activity|folic acid metabolic process|extracellular exosome	oas00670	One carbon pool by folate
ALDH3B1	4585.7	6494.84	2676.56	0.41213	-1.27883	2.83452e-44	1.8457e-43	Down	22.2781	20.7556	21.7225	45.7308	48.0125	54.437	GeneID:101112687	aldehyde dehydrogenase 3 family member B1	GO:0004028,GO:0004030,GO:0005886,GO:0006068,GO:0006081	3-chloroallyl aldehyde dehydrogenase activity|aldehyde dehydrogenase [NAD(P)+] activity|plasma membrane|ethanol catabolic process|cellular aldehyde metabolic process	oas00010,oas00340,oas00350,oas00360,oas00410,oas00980,oas00982,oas05204	Glycolysis / Gluconeogenesis|Histidine metabolism|Tyrosine metabolism|Phenylalanine metabolism|beta-Alanine metabolism|Metabolism of xenobiotics by cytochrome P450|Drug metabolism - cytochrome P450|Chemical carcinogenesis
ALDH4A1	7363.17	10830.7	3895.68	0.359704	-1.47512	8.96689e-59	8.88709e-58	Down	30.2472	32.3173	33.327	78.7393	79.6081	92.9871	GeneID:101105895	aldehyde dehydrogenase 4 family member A1	GO:0003842,GO:0004029,GO:0005759,GO:0010133,GO:0042802	1-pyrroline-5-carboxylate dehydrogenase activity|aldehyde dehydrogenase (NAD) activity|mitochondrial matrix|proline catabolic process to glutamate|identical protein binding	oas00250,oas00330	Alanine, aspartate and glutamate metabolism|Arginine and proline metabolism
ALDH6A1	1639.63	884.083	2395.17	2.70828	1.43738	1.47734e-42	9.03718e-42	Up	14.7391	14.3656	14.584	5.31162	5.77776	4.17779	GeneID:101106176	aldehyde dehydrogenase 6 family member A1	GO:0000062,GO:0004491,GO:0005739,GO:0006210,GO:0006573,GO:0006574,GO:0018478,GO:0019859	fatty-acyl-CoA binding|methylmalonate-semialdehyde dehydrogenase (acylating) activity|mitochondrion|thymine catabolic process|valine metabolic process|valine catabolic process|malonate-semialdehyde dehydrogenase (acetylating) activity|thymine metabolic process	oas00280,oas00410,oas00562,oas00640	Valine, leucine and isoleucine degradation|beta-Alanine metabolism|Inositol phosphate metabolism|Propanoate metabolism
ALDH8A1	5.61777	0	11.2355	61.6701	5.9465	6.4168e-05	0.000101707	Up	0.0919024	0.127104	0.172974	0	0	0	GeneID:101108757	aldehyde dehydrogenase 8 family member A1	GO:0001758,GO:0005622,GO:0005737,GO:0042573,GO:0042574	retinal dehydrogenase activity|intracellular|cytoplasm|retinoic acid metabolic process|retinal metabolic process	oas00380	Tryptophan metabolism
ALDOA	75396.6	103110	47683.1	0.46245	-1.11263	1.52439e-58	1.5024e-57	Down	785.445	786.03	808.689	1576.83	1584.05	1696.31	GeneID:443085	aldolase, fructose-bisphosphate A	GO:0002576,GO:0003723,GO:0003779,GO:0004332,GO:0005576,GO:0005615,GO:0005634,GO:0005829,GO:0006000,GO:0006094,GO:0006096,GO:0006754,GO:0006941,GO:0007015,GO:0007339,GO:0008092,GO:0008360,GO:0015629,GO:0015631,GO:0016020,GO:0030388,GO:0031093,GO:0031430,GO:0031674,GO:0034774,GO:0042802,GO:0043312,GO:0045296,GO:0046716,GO:0051289,GO:0061621,GO:0061827,GO:0070061,GO:0070062,GO:1904724,GO:1904813	platelet degranulation|RNA binding|actin binding|fructose-bisphosphate aldolase activity|extracellular region|extracellular space|nucleus|cytosol|fructose metabolic process|gluconeogenesis|glycolytic process|ATP biosynthetic process|striated muscle contraction|actin filament organization|binding of sperm to zona pellucida|cytoskeletal protein binding|regulation of cell shape|actin cytoskeleton|tu…	oas00010,oas00030,oas00051	Glycolysis / Gluconeogenesis|Pentose phosphate pathway|Fructose and mannose metabolism
ALDOC	226.237	304.939	147.536	0.483929	-1.04713	1.42675e-08	2.67442e-08	Down	2.55214	1.89303	1.93214	4.30158	3.64231	4.49875	GeneID:101105422	aldolase, fructose-bisphosphate C	GO:0004332,GO:0006096,GO:0030388	fructose-bisphosphate aldolase activity|glycolytic process|fructose 1,6-bisphosphate metabolic process	oas00010,oas00030,oas00051	Glycolysis / Gluconeogenesis|Pentose phosphate pathway|Fructose and mannose metabolism
ALG11	508.058	177.794	838.322	4.71378	2.23688	1.17133e-68	1.51983e-67	Up	5.23756	5.83406	5.96345	1.15014	1.20776	1.05665	GeneID:101120844	ALG11 alpha-1,2-mannosyltransferase	GO:0004377,GO:0005789,GO:0006487,GO:0006490,GO:0016020,GO:0016021	GDP-Man:Man3GlcNAc2-PP-Dol alpha-1,2-mannosyltransferase activity|endoplasmic reticulum membrane|protein N-linked glycosylation|oligosaccharide-lipid intermediate biosynthetic process|membrane|integral component of membrane	oas00510	N-Glycan biosynthesis
ALG12	1684.13	2388.1	980.163	0.41049	-1.28458	8.12167e-38	4.23387e-37	Down	6.98283	7.65103	7.98679	16.1582	17.0243	18.7887	GeneID:101112896	ALG12 alpha-1,6-mannosyltransferase	GO:0000030,GO:0005783,GO:0005789,GO:0006457,GO:0006487,GO:0006488,GO:0016020,GO:0016021,GO:0052917	mannosyltransferase activity|endoplasmic reticulum|endoplasmic reticulum membrane|protein folding|protein N-linked glycosylation|dolichol-linked oligosaccharide biosynthetic process|membrane|integral component of membrane|dol-P-Man:Man(7)GlcNAc(2)-PP-Dol alpha-1,6-mannosyltransferase activity	oas00510	N-Glycan biosynthesis
ALG2	357.223	221.369	493.076	2.22702	1.15512	1.99256e-17	5.17838e-17	Up	6.26912	6.31871	6.66775	2.61361	2.99837	2.55697	GeneID:101101953	ALG2 alpha-1,3/1,6-mannosyltransferase	GO:0000033,GO:0004378,GO:0005634,GO:0005737,GO:0005789,GO:0005829,GO:0006488,GO:0006490,GO:0015629,GO:0016020,GO:0016021,GO:0033577,GO:0046982,GO:0047485,GO:0048306,GO:0048471,GO:0051592,GO:0102704	alpha-1,3-mannosyltransferase activity|GDP-Man:Man1GlcNAc2-PP-Dol alpha-1,3-mannosyltransferase activity|nucleus|cytoplasm|endoplasmic reticulum membrane|cytosol|dolichol-linked oligosaccharide biosynthetic process|oligosaccharide-lipid intermediate biosynthetic process|actin cytoskeleton|membrane|integral component of membrane|protein glycosylation in endoplasmic reticulum|protein heterodimeriza…	oas00510	N-Glycan biosynthesis
ALG5	1036.34	664.429	1408.25	2.11862	1.08312	6.58141e-22	2.01039e-21	Up	28.9398	31.0282	30.6036	15.0457	14.4164	11.0016	GeneID:101108665	ALG5 dolichyl-phosphate beta-glucosyltransferase	GO:0004576,GO:0004581,GO:0005789,GO:0006486,GO:0006487,GO:0007368,GO:0016020,GO:0016021,GO:0018279	oligosaccharyl transferase activity|dolichyl-phosphate beta-glucosyltransferase activity|endoplasmic reticulum membrane|protein glycosylation|protein N-linked glycosylation|determination of left/right symmetry|membrane|integral component of membrane|protein N-linked glycosylation via asparagine	oas00510	N-Glycan biosynthesis
ALG6	194.938	90.9301	298.946	3.28928	1.71777	3.19658e-15	7.6743e-15	Up	3.46867	3.11992	3.49305	1.23408	0.636934	1.0249	GeneID:101108436	ALG6 alpha-1,3-glucosyltransferase	GO:0004583,GO:0005789,GO:0006487,GO:0006488,GO:0006490,GO:0016020,GO:0016021,GO:0042281,GO:0046527	dolichyl-phosphate-glucose-glycolipid alpha-glucosyltransferase activity|endoplasmic reticulum membrane|protein N-linked glycosylation|dolichol-linked oligosaccharide biosynthetic process|oligosaccharide-lipid intermediate biosynthetic process|membrane|integral component of membrane|dolichyl pyrophosphate Man9GlcNAc2 alpha-1,3-glucosyltransferase activity|glucosyltransferase activity	oas00510	N-Glycan biosynthesis
ALKBH1	663.048	407.999	918.097	2.24975	1.16976	3.03952e-27	1.10765e-26	Up	5.53528	5.51346	5.61644	2.30501	2.54034	2.15545	GeneID:101111374	alkB homolog 1, histone H2A dioxygenase	GO:0000049,GO:0001701,GO:0001764,GO:0001890,GO:0002101,GO:0005719,GO:0005739,GO:0006281,GO:0006307,GO:0006446,GO:0006448,GO:0008198,GO:0016706,GO:0031175,GO:0035516,GO:0042056,GO:0042245,GO:0043524,GO:0048589,GO:0051213,GO:0070129,GO:0070579,GO:0070989,GO:0080111,GO:0103053,GO:0140078,GO:1990983,GO:1990984	tRNA binding|in utero embryonic development|neuron migration|placenta development|tRNA wobble cytosine modification|nuclear euchromatin|mitochondrion|DNA repair|DNA dealkylation involved in DNA repair|regulation of translational initiation|regulation of translational elongation|ferrous iron binding|oxidoreductase activity, acting on paired donors, with incorporation or reduction of molecular oxyg…
ALKBH4	356.812	552.201	161.423	0.292377	-1.7741	4.15819e-33	1.85752e-32	Down	3.59388	3.09562	3.02956	10.0218	10.1261	11.228	GeneID:101117557	alkB homolog 4, lysine demethylase	GO:0003779,GO:0005634,GO:0005737,GO:0006482,GO:0016706,GO:0030496,GO:0031032,GO:0032451,GO:0036090,GO:0046872,GO:0070938	actin binding|nucleus|cytoplasm|protein demethylation|oxidoreductase activity, acting on paired donors, with incorporation or reduction of molecular oxygen, 2-oxoglutarate as one donor, and incorporation of one atom each of oxygen into both donors|midbody|actomyosin structure organization|demethylase activity|cleavage furrow ingression|metal ion binding|contractile ring
ALKBH6	450.024	654.033	246.014	0.376266	-1.41018	2.46416e-20	7.12838e-20	Down	4.64551	4.79197	5.31805	12.9596	10.1	13.9215	GeneID:101105845	alkB homolog 6	GO:0005634,GO:0005654,GO:0005737,GO:0005925,GO:0046872,GO:0051213	nucleus|nucleoplasm|cytoplasm|focal adhesion|metal ion binding|dioxygenase activity
ALKBH7	503.867	787.821	219.913	0.279231	-1.84047	5.90631e-30	2.37715e-29	Down	6.9791	8.10798	8.19666	25.1281	21.6634	31.7383	GeneID:101109968	alkB homolog 7	GO:0005759,GO:0006631,GO:0006974,GO:0010883,GO:0046872,GO:0051213,GO:1902445	mitochondrial matrix|fatty acid metabolic process|cellular response to DNA damage stimulus|regulation of lipid storage|metal ion binding|dioxygenase activity|regulation of mitochondrial membrane permeability involved in programmed necrotic cell death
ALKBH8	176.739	47.1795	306.299	6.49061	2.69835	3.99452e-30	1.61736e-29	Up	2.11015	2.32058	2.10407	0.453785	0.204791	0.294135	GeneID:101104088	alkB homolog 8, tRNA methyltransferase	GO:0000049,GO:0002098,GO:0005506,GO:0005634,GO:0005737,GO:0005829,GO:0006974,GO:0008270,GO:0016300,GO:0016604,GO:0016706,GO:0030488,GO:0055114	tRNA binding|tRNA wobble uridine modification|iron ion binding|nucleus|cytoplasm|cytosol|cellular response to DNA damage stimulus|zinc ion binding|tRNA (uracil) methyltransferase activity|nuclear body|oxidoreductase activity, acting on paired donors, with incorporation or reduction of molecular oxygen, 2-oxoglutarate as one donor, and incorporation of one atom each of oxygen into both donors|tRNA…
ALMS1	803.458	103.734	1503.18	14.5018	3.85816	6.57912e-29	2.55137e-28	Up	3.09718	2.93368	3.01538	0.19577	0.117398	0.273422	GeneID:101104651	ALMS1 centrosome and basal body associated protein	GO:0000086,GO:0000922,GO:0005813,GO:0005829,GO:0005929,GO:0010389,GO:0016197,GO:0051393,GO:0051492,GO:0097711,GO:0120162	G2/M transition of mitotic cell cycle|spindle pole|centrosome|cytosol|cilium|regulation of G2/M transition of mitotic cell cycle|endosomal transport|alpha-actinin binding|regulation of stress fiber assembly|ciliary basal body-plasma membrane docking|positive regulation of cold-induced thermogenesis
ALOX12B	3.4827	6.30207	0.663338	0.105148	-3.24951	0.0287772	0.0378213	Down	0.0112618	0.0113276	0	0.0427383	0.0740392	0.0856248	GeneID:101105929	arachidonate 12-lipoxygenase, 12R type			oas00590,oas04726	Arachidonic acid metabolism|Serotonergic synapse
ALS2	1079.27	664.938	1493.61	2.24549	1.16703	5.73876e-23	1.81492e-22	Up	5.87695	6.3824	6.19369	2.51158	3.0945	2.16758	GeneID:101109592	alsin Rho guanine nucleotide exchange factor ALS2			oas05014	Amyotrophic lateral sclerosis (ALS)
ALS2CL	166.459	256.204	76.7147	0.29946	-1.73957	1.57294e-18	4.26497e-18	Down	0.464324	0.334357	0.429018	1.29154	1.31323	1.26871	GeneID:101116432	ALS2 C-terminal like	GO:0005096,GO:0005737	GTPase activator activity|cytoplasm
ALYREF	2676.83	3716.7	1636.96	0.440477	-1.18286	2.15861e-39	1.1856e-38	Down	38.924	39.7133	41.9485	82.9807	81.8263	93.4171	GeneID:105606265	Aly/REF export factor	GO:0003723,GO:0005681,GO:0005737,GO:0006397,GO:0008380,GO:0016607,GO:0051028	RNA binding|spliceosomal complex|cytoplasm|mRNA processing|RNA splicing|nuclear speck|mRNA transport	oas03013,oas03015,oas03040,oas05168	RNA transport|mRNA surveillance pathway|Spliceosome|Herpes simplex virus 1 infection
AMD1	2447.2	1420.65	3473.74	2.44539	1.29006	1.48471e-42	9.07838e-42	Up	18.0324	17.5527	17.7101	7.58708	6.00478	6.99453	GeneID:101110851	adenosylmethionine decarboxylase 1	GO:0004014,GO:0005829,GO:0006557,GO:0006597,GO:0008295,GO:0019810	adenosylmethionine decarboxylase activity|cytosol|S-adenosylmethioninamine biosynthetic process|spermine biosynthetic process|spermidine biosynthetic process|putrescine binding	oas00270,oas00330	Cysteine and methionine metabolism|Arginine and proline metabolism
AMDHD2	829.933	1187.22	472.647	0.398192	-1.32846	1.77012e-29	7.0204e-29	Down	8.40303	9.28624	8.73102	19.4063	19.9033	23.2579	GeneID:101116953	amidohydrolase domain containing 2	GO:0005975,GO:0006046,GO:0008448,GO:0019262,GO:0046872,GO:0047419	carbohydrate metabolic process|N-acetylglucosamine catabolic process|N-acetylglucosamine-6-phosphate deacetylase activity|N-acetylneuraminate catabolic process|metal ion binding|N-acetylgalactosamine-6-phosphate deacetylase activity	oas00520	Amino sugar and nucleotide sugar metabolism
AMHR2	27.1029	2.94061	51.2652	17.2996	4.11267	9.0751e-11	1.85074e-10	Up	0.774435	0.72126	0.734198	0.0816378	0.0269387	0.0136299	GeneID:101109693	anti-Mullerian hormone receptor type 2	GO:0004675,GO:0005524,GO:0016021,GO:0046872	transmembrane receptor protein serine/threonine kinase activity|ATP binding|integral component of membrane|metal ion binding	oas04060,oas04350	Cytokine-cytokine receptor interaction|TGF-beta signaling pathway
AMIGO2	21.6615	6.92023	36.4028	5.25492	2.39367	1.0086e-05	1.66877e-05	Up	0.410912	0.423646	0.299046	0.0877162	0.057889	0.0585789	GeneID:101111179	adhesion molecule with Ig like domain 2	GO:0005634,GO:0005886,GO:0007156,GO:0007157,GO:0016021,GO:0043066,GO:0043069,GO:0051965	nucleus|plasma membrane|homophilic cell adhesion via plasma membrane adhesion molecules|heterophilic cell-cell adhesion via plasma membrane cell adhesion molecules|integral component of membrane|negative regulation of apoptotic process|negative regulation of programmed cell death|positive regulation of synapse assembly
AMMECR1	465.101	248.449	681.754	2.74238	1.45543	3.11328e-18	8.35664e-18	Up	3.53108	3.56686	3.27266	1.0469	1.58753	0.943848	GeneID:101113829	Alport syndrome, mental retardation, midface hypoplasia and elliptocytosis chromosomal region gene 1	GO:0005634	nucleus
AMN1	182.046	90.8691	273.222	3.00397	1.58687	1.1126e-15	2.71864e-15	Up	3.43407	3.67003	3.35844	1.38946	1.01975	0.88792	GeneID:101106760	antagonist of mitotic exit network 1 homolog	GO:0006511,GO:0016567,GO:0019005,GO:0031146	ubiquitin-dependent protein catabolic process|protein ubiquitination|SCF ubiquitin ligase complex|SCF-dependent proteasomal ubiquitin-dependent protein catabolic process
AMOT	711.323	461.475	961.171	2.08317	1.05878	2.08343e-23	6.7029e-23	Up	3.18842	3.56185	3.33248	1.5125	1.51351	1.5447	GeneID:101108810	angiomotin			oas04390,oas04530	Hippo signaling pathway|Tight junction
ANAPC11	924.508	1283.84	565.177	0.44032	-1.18338	1.47132e-19	4.14026e-19	Down	18.3232	20.9772	21.0054	37.1704	41.817	50.0364	GeneID:101114121	anaphase promoting complex subunit 11	GO:0005634,GO:0005654,GO:0005680,GO:0005730,GO:0005737,GO:0006511,GO:0007049,GO:0016567,GO:0031461,GO:0034450,GO:0045842,GO:0046872,GO:0051301,GO:0061630,GO:0070979,GO:0097602	nucleus|nucleoplasm|anaphase-promoting complex|nucleolus|cytoplasm|ubiquitin-dependent protein catabolic process|cell cycle|protein ubiquitination|cullin-RING ubiquitin ligase complex|ubiquitin-ubiquitin ligase activity|positive regulation of mitotic metaphase/anaphase transition|metal ion binding|cell division|ubiquitin protein ligase activity|protein K11-linked ubiquitination|cullin family prot…	oas04110,oas04114,oas04120,oas04914,oas05166	Cell cycle|Oocyte meiosis|Ubiquitin mediated proteolysis|Progesterone-mediated oocyte maturation|Human T-cell leukemia virus 1 infection
ANAPC2	954.958	1383.92	526	0.380114	-1.39549	4.07351e-32	1.76398e-31	Down	6.07418	5.58299	5.04606	12.4299	14.1047	14.9298	GeneID:101108299	anaphase promoting complex subunit 2	GO:0005654,GO:0005680,GO:0005829,GO:0007049,GO:0031145,GO:0031625,GO:0031915,GO:0045773,GO:0050775,GO:0051301,GO:0070979,GO:0090129	nucleoplasm|anaphase-promoting complex|cytosol|cell cycle|anaphase-promoting complex-dependent catabolic process|ubiquitin protein ligase binding|positive regulation of synaptic plasticity|positive regulation of axon extension|positive regulation of dendrite morphogenesis|cell division|protein K11-linked ubiquitination|positive regulation of synapse maturation	oas04110,oas04114,oas04120,oas04914,oas05166	Cell cycle|Oocyte meiosis|Ubiquitin mediated proteolysis|Progesterone-mediated oocyte maturation|Human T-cell leukemia virus 1 infection
ANAPC4	504.514	212.377	796.65	3.75197	1.90765	1.33942e-54	1.17807e-53	Up	6.5432	6.56472	6.98542	1.60125	1.75693	1.69885	GeneID:101105914	anaphase promoting complex subunit 4	GO:0004842,GO:0005634,GO:0005654,GO:0005680,GO:0005829,GO:0007049,GO:0019903,GO:0031145,GO:0034399,GO:0045842,GO:0051301,GO:0070979	ubiquitin-protein transferase activity|nucleus|nucleoplasm|anaphase-promoting complex|cytosol|cell cycle|protein phosphatase binding|anaphase-promoting complex-dependent catabolic process|nuclear periphery|positive regulation of mitotic metaphase/anaphase transition|cell division|protein K11-linked ubiquitination	oas04110,oas04114,oas04120,oas04914,oas05166	Cell cycle|Oocyte meiosis|Ubiquitin mediated proteolysis|Progesterone-mediated oocyte maturation|Human T-cell leukemia virus 1 infection
ANGEL1	447.095	654.785	239.405	0.365693	-1.4513	3.62787e-23	1.15587e-22	Down	1.88275	1.42208	1.77751	3.92443	4.5883	4.60308	GeneID:101109279	angel homolog 1	GO:0005634,GO:0005783,GO:0005801,GO:0005829,GO:0008190,GO:0019904,GO:0048471	nucleus|endoplasmic reticulum|cis-Golgi network|cytosol|eukaryotic initiation factor 4E binding|protein domain specific binding|perinuclear region of cytoplasm
ANGEL2	456.994	179.042	734.946	4.10598	2.03773	7.32709e-56	6.65556e-55	Up	4.59799	4.73111	4.52195	1.13774	0.97456	1.07475	GeneID:101113611	angel homolog 2	GO:0003730,GO:0005737,GO:0015030,GO:0045930,GO:0070935	mRNA 3'-UTR binding|cytoplasm|Cajal body|negative regulation of mitotic cell cycle|3'-UTR-mediated mRNA stabilization
ANGPT1	543.52	74.7174	1012.32	13.5586	3.76113	4.91062e-103	1.20994e-101	Up	6.35328	5.95138	6.31055	0.569404	0.273296	0.455161	GeneID:497271	angiopoietin 1	GO:0001525,GO:0004540,GO:0005576,GO:0030154,GO:0030971,GO:0048014	angiogenesis|ribonuclease activity|extracellular region|cell differentiation|receptor tyrosine kinase binding|Tie signaling pathway	oas04010,oas04014,oas04015,oas04066,oas04151,oas05323	MAPK signaling pathway|Ras signaling pathway|Rap1 signaling pathway|HIF-1 signaling pathway|PI3K-Akt signaling pathway|Rheumatoid arthritis
ANGPTL1	503.97	67.9893	939.951	13.86	3.79286	2.84153e-112	8.20158e-111	Up	9.57038	10.0002	9.86593	0.715025	0.455726	0.834008	GeneID:101120347	angiopoietin like 1	GO:0005102,GO:0005615,GO:0007169	signaling receptor binding|extracellular space|transmembrane receptor protein tyrosine kinase signaling pathway
ANK2	260.301	158.372	362.23	2.28553	1.19253	4.55601e-12	9.76297e-12	Up	0.651909	0.601077	0.555243	0.242088	0.301497	0.204958	GeneID:101115623	ankyrin 2			oas05205	Proteoglycans in cancer
ANK3	31.0367	9.19349	52.88	5.73619	2.52009	8.66995e-08	1.57184e-07	Up	0.0757918	0.0778921	0.110813	0.0187583	0.0154746	0.00939545	GeneID:101120296	ankyrin 3			oas05205	Proteoglycans in cancer
ANKEF1	43.0975	21.3271	64.868	3.03486	1.60163	8.34623e-05	0.00013139	Up	0.297504	0.508148	0.298637	0.154441	0.121255	0.0693524	GeneID:101108328	ankyrin repeat and EF-hand domain containing 1	GO:0005509	calcium ion binding
ANKIB1	1295.36	639.441	1951.28	3.05022	1.60891	2.69166e-40	1.52639e-39	Up	8.82835	8.01477	8.48397	2.67962	3.10682	2.07421	GeneID:101111273	ankyrin repeat and IBR domain containing 1	GO:0000151,GO:0000209,GO:0005737,GO:0006511,GO:0031624,GO:0032436,GO:0046872,GO:0061630	ubiquitin ligase complex|protein polyubiquitination|cytoplasm|ubiquitin-dependent protein catabolic process|ubiquitin conjugating enzyme binding|positive regulation of proteasomal ubiquitin-dependent protein catabolic process|metal ion binding|ubiquitin protein ligase activity
ANKLE1	60.9769	94.4865	27.4673	0.290668	-1.78255	9.19998e-09	1.73765e-08	Down	0.313815	0.326171	0.231008	0.903116	0.962798	0.964332	GeneID:101115620	ankyrin repeat and LEM domain containing 1	GO:0004519,GO:0005634,GO:0005737,GO:0006281,GO:0006611,GO:0090305,GO:2001022	endonuclease activity|nucleus|cytoplasm|DNA repair|protein export from nucleus|nucleic acid phosphodiester bond hydrolysis|positive regulation of response to DNA damage stimulus
ANKMY1	23.7803	33.0027	14.5578	0.441025	-1.18107	0.0125461	0.0170647	Down	0.11335	0.138444	0.105655	0.207399	0.311769	0.246232	GeneID:101104451	ankyrin repeat and MYND domain containing 1	GO:0046872	metal ion binding
ANKMY2	469.24	210.443	728.036	3.45684	1.78946	7.21916e-41	4.17077e-40	Up	7.91491	7.76188	7.34841	2.32499	2.23303	1.74429	GeneID:101104569	ankyrin repeat and MYND domain containing 2	GO:0005929,GO:0019899,GO:0046872	cilium|enzyme binding|metal ion binding
ANKRD1	6103.29	2539.76	9666.82	3.80598	1.92827	1.24543e-98	2.85943e-97	Up	149.438	148.162	156.615	43.9531	34.6224	34.299	GeneID:100820746	ankyrin repeat domain 1	GO:0001650,GO:0002039,GO:0003677,GO:0003713,GO:0003714,GO:0003779,GO:0005634,GO:0005667,GO:0005737,GO:0005829,GO:0006357,GO:0031432,GO:0031674,GO:0035690,GO:0035914,GO:0035994,GO:0042826,GO:0043065,GO:0043517,GO:0045445,GO:0048471,GO:0050714,GO:0055008,GO:0061629,GO:0070412,GO:0071222,GO:0071260,GO:0071347,GO:0071356,GO:0071560,GO:2000279	fibrillar center|p53 binding|DNA binding|transcription coactivator activity|transcription corepressor activity|actin binding|nucleus|transcription factor complex|cytoplasm|cytosol|regulation of transcription by RNA polymerase II|titin binding|I band|cellular response to drug|skeletal muscle cell differentiation|response to muscle stretch|histone deacetylase binding|positive regulation of apoptoti…
ANKRD12	2113.59	135.212	4091.96	30.2893	4.92073	1.06163e-75	1.60242e-74	Up	11.2868	10.7533	10.8352	0.316649	0.243804	0.460693	GeneID:101106986	ankyrin repeat domain 12	GO:0005654,GO:0005829	nucleoplasm|cytosol
ANKRD13C	542.361	277.861	806.86	2.90459	1.53833	2.878e-33	1.28972e-32	Up	5.07469	5.34331	5.73658	1.94086	1.52467	1.78743	GeneID:101118233	ankyrin repeat domain 13C	GO:0005102,GO:0005783,GO:0005789,GO:0006621,GO:0010869,GO:0048471,GO:2000209	signaling receptor binding|endoplasmic reticulum|endoplasmic reticulum membrane|protein retention in ER lumen|regulation of receptor biosynthetic process|perinuclear region of cytoplasm|regulation of anoikis
ANKRD13D	518.098	733.924	302.273	0.411903	-1.27962	4.46252e-28	1.67365e-27	Down	3.58396	3.85353	3.89535	8.61791	8.63564	8.72682	GeneID:101108527	ankyrin repeat domain 13D	GO:0005770,GO:0005886	late endosome|plasma membrane
ANKRD17	4655.86	2532.02	6779.69	2.67752	1.4209	1.08743e-79	1.78003e-78	Up	18.1655	17.4567	16.9339	6.00184	6.604	5.94181	GeneID:101103397	ankyrin repeat domain 17	GO:0000785,GO:0001955,GO:0003682,GO:0003723,GO:0005634,GO:0005737,GO:0006275,GO:0016020,GO:0016032,GO:0031965,GO:0042742,GO:0043123,GO:0045087,GO:0045787,GO:0051151,GO:1900087,GO:1900245,GO:1900246	chromatin|blood vessel maturation|chromatin binding|RNA binding|nucleus|cytoplasm|regulation of DNA replication|membrane|viral process|nuclear membrane|defense response to bacterium|positive regulation of I-kappaB kinase/NF-kappaB signaling|innate immune response|positive regulation of cell cycle|negative regulation of smooth muscle cell differentiation|positive regulation of G1/S transition of m…
ANKRD22	180.054	62.8764	297.231	4.73766	2.24418	2.33006e-17	6.03112e-17	Up	3.42974	3.71811	4.30989	0.783358	0.405633	1.08653	GeneID:101120533	ankyrin repeat domain 22
ANKRD28	1681.34	1037.9	2324.78	2.23951	1.16319	6.50254e-32	2.7936e-31	Up	7.80376	8.3296	8.08864	3.22937	3.91948	3.07502	GeneID:101119271	ankyrin repeat domain 28	GO:0000139,GO:0005654,GO:0005829,GO:0048208	Golgi membrane|nucleoplasm|cytosol|COPII vesicle coating
ANKRD31	4.95194	0	9.90388	54.367	5.76466	0.000216326	0.000331652	Up	0.0437186	0.0175897	0.0702163	0	0	0	GeneID:101104753	ankyrin repeat domain 31
ANKRD33	8.25603	13.2061	3.306	0.250397	-1.99771	0.015395	0.0207798	Down	0.0173353	0.0348733	0.0348028	0.115128	0.105828	0.10709	GeneID:101113483	ankyrin repeat domain 33	GO:0000122,GO:0005634,GO:0005829,GO:0035914,GO:2000678	negative regulation of transcription by RNA polymerase II|nucleus|cytosol|skeletal muscle cell differentiation|negative regulation of transcription regulatory region DNA binding
ANKRD39	680.204	1003.95	356.455	0.35513	-1.49358	1.05881e-38	5.67441e-38	Down	2.93713	2.78833	3.19678	7.71007	7.64023	8.35857	GeneID:101113669	ankyrin repeat domain 39
ANKRD42	245.07	99.1253	391.015	3.94083	1.9785	5.22751e-30	2.10694e-29	Up	1.31791	1.29048	1.15717	0.304304	0.348964	0.250506	GeneID:101106210	ankyrin repeat domain 42	GO:0005634,GO:0051059,GO:0051091,GO:0051092,GO:1900017	nucleus|NF-kappaB binding|positive regulation of DNA-binding transcription factor activity|positive regulation of NF-kappaB transcription factor activity|positive regulation of cytokine production involved in inflammatory response
ANKRD44	613.326	134.116	1092.54	8.13912	3.02487	3.02788e-121	1.04959e-119	Up	4.20518	3.96016	3.8358	0.487966	0.503466	0.402754	GeneID:101121070	ankyrin repeat domain 44
ANKRD45	80.2617	42.1081	118.415	2.80915	1.49013	1.66978e-06	2.85939e-06	Up	2.53767	3.67247	3.09319	1.54774	0.802562	0.787517	GeneID:101116848	ankyrin repeat domain 45
ANKRD46	230.491	76.3918	384.59	5.04338	2.33439	6.67142e-23	2.10423e-22	Up	2.07303	2.7307	2.68652	0.499305	0.277279	0.622164	GeneID:101103486	ankyrin repeat domain 46	GO:0016021	integral component of membrane
ANKRD49	260.103	152.324	367.883	2.41573	1.27246	1.18568e-14	2.79113e-14	Up	3.26114	3.29711	2.81797	1.34764	1.06568	1.25412	GeneID:101115060	ankyrin repeat domain 49	GO:0005634,GO:0007283,GO:0030154,GO:0045893	nucleus|spermatogenesis|cell differentiation|positive regulation of transcription, DNA-templated
ANKRD50	581.466	196.048	966.885	4.93473	2.30297	1.28976e-77	2.01781e-76	Up	3.34808	3.32748	3.08355	0.62519	0.581389	0.661067	GeneID:101123497	ankyrin repeat domain 50	GO:0005768,GO:0015031,GO:1990126	endosome|protein transport|retrograde transport, endosome to plasma membrane
ANKRD7	14.8977	0	29.7954	163.503	7.35317	2.15997e-08	4.01268e-08	Up	0.243281	0.200782	0.118973	0	0	0	GeneID:101121676	ankyrin repeat domain 7
ANKRD9	643.836	910.283	377.39	0.414658	-1.27	2.06626e-26	7.33694e-26	Down	1.83789	1.86315	1.80626	3.78408	4.26113	4.48567	GeneID:105603272	ankyrin repeat domain 9	GO:0005829,GO:0016020,GO:0043194,GO:0043687,GO:0044325,GO:0072659	cytosol|membrane|axon initial segment|post-translational protein modification|ion channel binding|protein localization to plasma membrane
ANKS3	770.214	1057.15	483.281	0.457226	-1.12902	1.95912e-16	4.93021e-16	Down	3.21744	3.75436	4.65363	7.18772	8.47743	8.31486	GeneID:101103287	ankyrin repeat and sterile alpha motif domain containing 3
ANLN	5330.95	1491.36	9170.55	6.15001	2.62059	8.21104e-91	1.63332e-89	Up	52.4869	53.7245	53.6735	9.33006	6.01349	9.18237	GeneID:101116045	anillin actin binding protein
ANO6	2608.36	1374.01	3842.7	2.79624	1.48349	1.96627e-73	2.82899e-72	Up	18.1228	18.1264	17.6488	6.10715	6.6103	5.50685	GeneID:101108825	anoctamin 6	GO:0002407,GO:0002543,GO:0005227,GO:0005229,GO:0005244,GO:0005247,GO:0005622,GO:0005829,GO:0005886,GO:0006812,GO:0006821,GO:0007596,GO:0009986,GO:0016020,GO:0017121,GO:0017128,GO:0030501,GO:0032060,GO:0034220,GO:0034707,GO:0034767,GO:0035579,GO:0035590,GO:0035630,GO:0035725,GO:0042803,GO:0043065,GO:0043312,GO:0045794,GO:0046931,GO:0060100,GO:0061589,GO:0061590,GO:0061591,GO:0070062,GO:0070588,GO:…	dendritic cell chemotaxis|activation of blood coagulation via clotting cascade|calcium activated cation channel activity|intracellular calcium activated chloride channel activity|voltage-gated ion channel activity|voltage-gated chloride channel activity|intracellular|cytosol|plasma membrane|cation transport|chloride transport|blood coagulation|cell surface|membrane|phospholipid scrambling|phospho…
ANP32E	1786.01	679.983	2892.03	4.25256	2.08833	1.28239e-126	4.91513e-125	Up	20.2958	21.2144	21.9264	4.58237	5.0863	4.42539	GeneID:101102602	acidic nuclear phosphoprotein 32 family member E	GO:0000812,GO:0005634,GO:0005737,GO:0019212,GO:0031410,GO:0042393,GO:0043486	Swr1 complex|nucleus|cytoplasm|phosphatase inhibitor activity|cytoplasmic vesicle|histone binding|histone exchange
ANTXR2	3416.53	2127.93	4705.14	2.21089	1.14463	7.58463e-35	3.60327e-34	Up	19.4725	18.9351	18.9856	7.87892	9.4351	7.23519	GeneID:101113070	ANTXR cell adhesion molecule 2	GO:0004888,GO:0005576,GO:0005789,GO:0005886,GO:0009897,GO:0009986,GO:0010008,GO:0016021,GO:0022414,GO:0046872,GO:1901998	transmembrane signaling receptor activity|extracellular region|endoplasmic reticulum membrane|plasma membrane|external side of plasma membrane|cell surface|endosome membrane|integral component of membrane|reproductive process|metal ion binding|toxin transport	oas04621	NOD-like receptor signaling pathway
ANXA1	13368	8610.35	18125.6	2.10511	1.07389	8.80609e-07	1.52703e-06	Up	308.08	311.641	323.739	171.287	100.043	151.739	GeneID:101123269	annexin A1	GO:0001891,GO:0002250,GO:0002548,GO:0002685,GO:0005198,GO:0005509,GO:0005544,GO:0005615,GO:0005634,GO:0005829,GO:0006909,GO:0006954,GO:0007166,GO:0007187,GO:0008360,GO:0010165,GO:0014839,GO:0016020,GO:0016323,GO:0016324,GO:0016328,GO:0019834,GO:0030073,GO:0030216,GO:0030659,GO:0030674,GO:0030850,GO:0031018,GO:0031232,GO:0031313,GO:0031340,GO:0031394,GO:0031514,GO:0031532,GO:0031901,GO:0032355,GO:…	phagocytic cup|adaptive immune response|monocyte chemotaxis|regulation of leukocyte migration|structural molecule activity|calcium ion binding|calcium-dependent phospholipid binding|extracellular space|nucleus|cytosol|phagocytosis|inflammatory response|cell surface receptor signaling pathway|G protein-coupled receptor signaling pathway, coupled to cyclic nucleotide second messenger|regulation of …
ANXA3	2203.28	1265.99	3140.58	2.48086	1.31084	8.8365e-62	9.67296e-61	Up	56.7983	58.8274	59.095	23.4723	21.1518	21.9094	GeneID:101111885	annexin A3	GO:0005509,GO:0005544,GO:0006909,GO:0019834,GO:0048306,GO:0051384	calcium ion binding|calcium-dependent phospholipid binding|phagocytosis|phospholipase A2 inhibitor activity|calcium-dependent protein binding|response to glucocorticoid
ANXA4	3902.14	1999.24	5805.04	2.90309	1.53759	3.69641e-37	1.88119e-36	Up	70.1208	71.4672	71.3348	26.0302	26.3701	17.1116	GeneID:101107176	annexin A4	GO:0005509,GO:0005544,GO:0005634,GO:0005829,GO:0006357,GO:0007219,GO:0008201,GO:0009986,GO:0016020,GO:0016324,GO:0030246,GO:0030855,GO:0031965,GO:0032088,GO:0035374,GO:0042584,GO:0042802,GO:0048306,GO:0048471,GO:0051059,GO:2000483	calcium ion binding|calcium-dependent phospholipid binding|nucleus|cytosol|regulation of transcription by RNA polymerase II|Notch signaling pathway|heparin binding|cell surface|membrane|apical plasma membrane|carbohydrate binding|epithelial cell differentiation|nuclear membrane|negative regulation of NF-kappaB transcription factor activity|chondroitin sulfate binding|chromaffin granule membrane|i…
ANXA9	14.5559	20.8418	8.27009	0.396957	-1.33295	0.0255263	0.0337432	Down	0.101691	0.146121	0.116661	0.303218	0.245591	0.31755	GeneID:101109752	annexin A9	GO:0001786,GO:0005509,GO:0005544,GO:0015464	phosphatidylserine binding|calcium ion binding|calcium-dependent phospholipid binding|acetylcholine receptor activity
AOC2	62.7921	9.48661	116.097	12.1656	3.60473	6.95886e-20	1.98226e-19	Up	0.961426	0.889058	0.879477	0.117696	0.065538	0.0294752	GeneID:101106783	amine oxidase copper containing 2			oas00260,oas00350,oas00360,oas00410	Glycine, serine and threonine metabolism|Tyrosine metabolism|Phenylalanine metabolism|beta-Alanine metabolism
AP1AR	91.0701	29.7782	152.362	5.12232	2.3568	9.15665e-16	2.24402e-15	Up	1.04127	0.944098	1.40592	0.243497	0.151515	0.229981	GeneID:101119564	adaptor related protein complex 1 associated regulatory protein	GO:0001920,GO:0005768,GO:0005769,GO:0005770,GO:0005794,GO:0005829,GO:0015031,GO:0019894,GO:0030133,GO:0034315,GO:0034613,GO:0035650,GO:0048203,GO:1900025,GO:2000146	negative regulation of receptor recycling|endosome|early endosome|late endosome|Golgi apparatus|cytosol|protein transport|kinesin binding|transport vesicle|regulation of Arp2/3 complex-mediated actin nucleation|cellular protein localization|AP-1 adaptor complex binding|vesicle targeting, trans-Golgi to endosome|negative regulation of substrate adhesion-dependent cell spreading|negative regulation…
AP1M1	4906.34	6759.97	3052.72	0.451603	-1.14687	6.66534e-58	6.44346e-57	Down	35.8922	36.8851	36.4434	73.7563	76.6586	77.9086	GeneID:101116140	adaptor related protein complex 1 subunit mu 1	GO:0000139,GO:0005765,GO:0005829,GO:0005886,GO:0006886,GO:0016020,GO:0019886,GO:0030131,GO:0030659,GO:0030665,GO:0032438,GO:0032588,GO:0035579,GO:0035646,GO:0043312,GO:0050690,GO:0070062	Golgi membrane|lysosomal membrane|cytosol|plasma membrane|intracellular protein transport|membrane|antigen processing and presentation of exogenous peptide antigen via MHC class II|clathrin adaptor complex|cytoplasmic vesicle membrane|clathrin-coated vesicle membrane|melanosome organization|trans-Golgi network membrane|specific granule membrane|endosome to melanosome transport|neutrophil degranul…	oas04142,oas05170	Lysosome|Human immunodeficiency virus 1 infection
AP1S1	8016.22	11383.9	4648.5	0.408353	-1.29211	1.53158e-46	1.07127e-45	Down	92.1354	99.8931	97.1386	216.13	205.114	246.518	GeneID:101122493	adaptor related protein complex 1 subunit sigma 1	GO:0000139,GO:0005765,GO:0005794,GO:0005829,GO:0005905,GO:0006886,GO:0006898,GO:0009615,GO:0016020,GO:0019886,GO:0030121,GO:0030659,GO:0032588,GO:0042147,GO:0043195,GO:0043231,GO:0050690	Golgi membrane|lysosomal membrane|Golgi apparatus|cytosol|clathrin-coated pit|intracellular protein transport|receptor-mediated endocytosis|response to virus|membrane|antigen processing and presentation of exogenous peptide antigen via MHC class II|AP-1 adaptor complex|cytoplasmic vesicle membrane|trans-Golgi network membrane|retrograde transport, endosome to Golgi|terminal bouton|intracellular m…	oas04142,oas05170	Lysosome|Human immunodeficiency virus 1 infection
AP1S2	2097.9	1010.13	3185.67	3.15351	1.65696	2.69295e-95	5.79702e-94	Up	22.1348	23.7436	23.1222	7.30266	6.81338	6.56208	GeneID:101104633	adaptor related protein complex 1 subunit sigma 2	GO:0005794,GO:0005905,GO:0006886,GO:0016192,GO:0030117,GO:0030659	Golgi apparatus|clathrin-coated pit|intracellular protein transport|vesicle-mediated transport|membrane coat|cytoplasmic vesicle membrane	oas04142,oas05170	Lysosome|Human immunodeficiency virus 1 infection
AP1S3	76.199	38.9895	113.409	2.90989	1.54096	8.1492e-08	1.47951e-07	Up	1.13795	1.07307	1.28507	0.472336	0.276732	0.386249	GeneID:101117145	adaptor related protein complex 1 subunit sigma 3	GO:0005794,GO:0005905,GO:0006605,GO:0016192,GO:0030117,GO:0030659,GO:0043231	Golgi apparatus|clathrin-coated pit|protein targeting|vesicle-mediated transport|membrane coat|cytoplasmic vesicle membrane|intracellular membrane-bounded organelle	oas04142,oas05170	Lysosome|Human immunodeficiency virus 1 infection
AP2A1	13884.1	18667.4	9100.72	0.487527	-1.03645	1.26087e-44	8.32128e-44	Down	73.7725	73.5222	70.1627	135.064	138.522	147.398	GeneID:101108595	adaptor related protein complex 2 subunit alpha 1	GO:0005829,GO:0005886,GO:0006886,GO:0006895,GO:0006897,GO:0008022,GO:0010976,GO:0016020,GO:0016323,GO:0016324,GO:0019886,GO:0019901,GO:0030122,GO:0030130,GO:0030666,GO:0030669,GO:0032433,GO:0032802,GO:0034383,GO:0035615,GO:0036020,GO:0044877,GO:0045334,GO:0048013,GO:0048260,GO:0050690,GO:0050750,GO:0060071,GO:0061024,GO:0072583,GO:1900126	cytosol|plasma membrane|intracellular protein transport|Golgi to endosome transport|endocytosis|protein C-terminus binding|positive regulation of neuron projection development|membrane|basolateral plasma membrane|apical plasma membrane|antigen processing and presentation of exogenous peptide antigen via MHC class II|protein kinase binding|AP-2 adaptor complex|clathrin coat of trans-Golgi network …	oas04144,oas04721,oas04961,oas05016	Endocytosis|Synaptic vesicle cycle|Endocrine and other factor-regulated calcium reabsorption|Huntington disease
AP2S1	6121.43	8237.92	4004.95	0.486183	-1.04043	3.21557e-32	1.39846e-31	Down	107.809	110.029	113.336	212.815	195.108	234.557	GeneID:101122460	adaptor related protein complex 2 subunit sigma 1	GO:0005215,GO:0005829,GO:0005886,GO:0006886,GO:0008565,GO:0019886,GO:0030100,GO:0030122,GO:0030666,GO:0030669,GO:0032802,GO:0034383,GO:0036020,GO:0045334,GO:0048013,GO:0048268,GO:0050690,GO:0060071,GO:0061024,GO:0072583	transporter activity|cytosol|plasma membrane|intracellular protein transport|protein transporter activity|antigen processing and presentation of exogenous peptide antigen via MHC class II|regulation of endocytosis|AP-2 adaptor complex|endocytic vesicle membrane|clathrin-coated endocytic vesicle membrane|low-density lipoprotein particle receptor catabolic process|low-density lipoprotein particle c…	oas04144,oas04721,oas04961,oas05016	Endocytosis|Synaptic vesicle cycle|Endocrine and other factor-regulated calcium reabsorption|Huntington disease
AP3B1	2764.07	832.495	4695.64	5.64151	2.49608	1.57159e-104	3.96202e-103	Up	31.2576	31.7808	33.4019	6.16618	4.27289	5.70074	GeneID:101112650	adaptor related protein complex 3 subunit beta 1	GO:0005794,GO:0006622,GO:0007596,GO:0008089,GO:0016182,GO:0019903,GO:0030123,GO:0030131,GO:0030665,GO:0030742,GO:0032438,GO:0048007,GO:0048490,GO:0051138,GO:0098794,GO:1904115	Golgi apparatus|protein targeting to lysosome|blood coagulation|anterograde axonal transport|synaptic vesicle budding from endosome|protein phosphatase binding|AP-3 adaptor complex|clathrin adaptor complex|clathrin-coated vesicle membrane|GTP-dependent protein binding|melanosome organization|antigen processing and presentation, exogenous lipid antigen via MHC class Ib|anterograde synaptic vesicle…	oas04142	Lysosome
AP3M1	2062.54	569.493	3555.58	6.24292	2.64222	3.11458e-115	9.47301e-114	Up	18.615	19.5938	19.7375	3.59334	2.44209	2.7418	GeneID:101122075	adaptor related protein complex 3 subunit mu 1	GO:0005764,GO:0005765,GO:0005794,GO:0006622,GO:0008089,GO:0016032,GO:0017137,GO:0030131,GO:0030659,GO:0048490,GO:1904115	lysosome|lysosomal membrane|Golgi apparatus|protein targeting to lysosome|anterograde axonal transport|viral process|Rab GTPase binding|clathrin adaptor complex|cytoplasmic vesicle membrane|anterograde synaptic vesicle transport|axon cytoplasm	oas04142	Lysosome
AP3S1	1567.03	949.551	2184.51	2.30061	1.20202	3.21486e-27	1.17094e-26	Up	42.6165	42.9436	42.9736	20.759	14.8478	17.2001	GeneID:101107603	adaptor related protein complex 3 subunit sigma 1	GO:0005802,GO:0006886,GO:0008089,GO:0016020,GO:0016192,GO:0030123,GO:0030659,GO:0043231,GO:0048490,GO:1904115	trans-Golgi network|intracellular protein transport|anterograde axonal transport|membrane|vesicle-mediated transport|AP-3 adaptor complex|cytoplasmic vesicle membrane|intracellular membrane-bounded organelle|anterograde synaptic vesicle transport|axon cytoplasm	oas04142	Lysosome
AP4E1	515.808	105.556	926.059	8.78399	3.13488	2.13134e-110	5.87594e-109	Up	3.67805	3.92924	3.84761	0.417815	0.356165	0.457294	GeneID:101106174	adaptor related protein complex 4 subunit epsilon 1	GO:0006605,GO:0008104,GO:0016192,GO:0030124,GO:0031904,GO:0032588	protein targeting|protein localization|vesicle-mediated transport|AP-4 adaptor complex|endosome lumen|trans-Golgi network membrane	oas04142	Lysosome
AP4M1	754.677	1102.35	407.008	0.369313	-1.43708	6.58762e-21	1.94588e-20	Down	5.7948	6.09081	7.04797	16.4933	12.6127	19.1882	GeneID:101107757	adaptor related protein complex 4 subunit mu 1	GO:0005769,GO:0005802,GO:0005829,GO:0006605,GO:0006622,GO:0006886,GO:0006895,GO:0008104,GO:0019904,GO:0030124,GO:0030131,GO:0090160,GO:1903361	early endosome|trans-Golgi network|cytosol|protein targeting|protein targeting to lysosome|intracellular protein transport|Golgi to endosome transport|protein localization|protein domain specific binding|AP-4 adaptor complex|clathrin adaptor complex|Golgi to lysosome transport|protein localization to basolateral plasma membrane	oas04142	Lysosome
AP4S1	209.447	121.168	297.727	2.45928	1.29823	1.16743e-12	2.55668e-12	Up	6.24454	6.91979	5.94961	2.45012	2.08749	2.79637	GeneID:101115405	adaptor related protein complex 4 subunit sigma 1	GO:0005794,GO:0015031,GO:0030124	Golgi apparatus|protein transport|AP-4 adaptor complex	oas04142	Lysosome
AP5B1	534.431	788.691	280.17	0.355329	-1.49277	1.06257e-26	3.80359e-26	Down	2.43902	2.40287	2.25547	5.76917	5.8131	7.24779	GeneID:101102439	adaptor related protein complex 5 subunit beta 1	GO:0015031,GO:0016197,GO:0030119	protein transport|endosomal transport|AP-type membrane coat adaptor complex
AP5M1	895.513	154.438	1636.59	10.6026	3.40635	1.92551e-95	4.17037e-94	Up	6.42551	6.27612	6.12635	0.719736	0.359809	0.598417	GeneID:101121268	adaptor related protein complex 5 subunit mu 1	GO:0005764,GO:0005765,GO:0005770,GO:0005829,GO:0015031,GO:0016020,GO:0016197,GO:0030119,GO:0031902	lysosome|lysosomal membrane|late endosome|cytosol|protein transport|membrane|endosomal transport|AP-type membrane coat adaptor complex|late endosome membrane
AP5S1	1169.16	1786.72	551.586	0.30877	-1.6954	1.98066e-55	1.77744e-54	Down	7.90797	7.79423	8.48956	24.099	22.6887	27.1086	GeneID:101120100	adaptor related protein complex 5 subunit sigma 1	GO:0000724,GO:0005654,GO:0005764,GO:0005765,GO:0005770,GO:0005829,GO:0015031,GO:0016197,GO:0030119,GO:0031902	double-strand break repair via homologous recombination|nucleoplasm|lysosome|lysosomal membrane|late endosome|cytosol|protein transport|endosomal transport|AP-type membrane coat adaptor complex|late endosome membrane
AP5Z1	124.368	168.337	80.3976	0.477853	-1.06536	0.000237836	0.000363724	Down	0.707573	0.728455	0.593284	0.773976	1.44637	1.77216	GeneID:114108638	adaptor related protein complex 5 subunit zeta 1	GO:0000724,GO:0005634,GO:0005654,GO:0005737,GO:0015031,GO:0016197,GO:0016607,GO:0030119,GO:0044599	double-strand break repair via homologous recombination|nucleus|nucleoplasm|cytoplasm|protein transport|endosomal transport|nuclear speck|AP-type membrane coat adaptor complex|AP-5 adaptor complex
APAF1	449.456	195.617	703.295	3.5926	1.84503	2.69289e-37	1.37692e-36	Up	2.58867	2.45953	2.23515	0.631817	0.753758	0.532296	GeneID:100135699	apoptotic peptidase activating factor 1			oas01524,oas04115,oas04210,oas04215,oas05010,oas05012,oas05014,oas05016,oas05134,oas05152,oas05160,oas05161,oas05162,oas05164,oas05168,oas05169,oas05200,oas05222	Platinum drug resistance|p53 signaling pathway|Apoptosis|Apoptosis - multiple species|Alzheimer disease|Parkinson disease|Amyotrophic lateral sclerosis (ALS)|Huntington disease|Legionellosis|Tuberculosis|Hepatitis C|Hepatitis B|Measles|Influenza A|Herpes simplex virus 1 infection|Epstein-Barr virus infection|Pathways in cancer|Small cell lung cancer
APBA3	813.981	1115.02	512.94	0.460123	-1.11991	2.43739e-25	8.34067e-25	Down	6.90338	6.82261	7.09084	13.9241	13.4699	15.296	GeneID:101115028	amyloid beta precursor protein binding family A member 3	GO:0001540,GO:0001701,GO:0004857,GO:0005737,GO:0005886,GO:0007268,GO:0010468,GO:0015031,GO:0019899,GO:0043086,GO:0043197,GO:0045202,GO:0048471	amyloid-beta binding|in utero embryonic development|enzyme inhibitor activity|cytoplasm|plasma membrane|chemical synaptic transmission|regulation of gene expression|protein transport|enzyme binding|negative regulation of catalytic activity|dendritic spine|synapse|perinuclear region of cytoplasm
APBB1	1761.58	2461.24	1061.91	0.431506	-1.21255	1.71535e-36	8.58163e-36	Down	5.76524	6.39682	6.43023	12.8558	13.1925	14.5948	GeneID:101118129	amyloid beta precursor protein binding family B member 1	GO:0000122,GO:0001540,GO:0003682,GO:0005634,GO:0005654,GO:0005737,GO:0005886,GO:0006302,GO:0006355,GO:0006915,GO:0006974,GO:0007050,GO:0007165,GO:0007409,GO:0008134,GO:0010039,GO:0010976,GO:0016607,GO:0030027,GO:0030308,GO:0030426,GO:0032991,GO:0042393,GO:0042734,GO:0043025,GO:0043065,GO:0043197,GO:0043967,GO:0044304,GO:0044877,GO:0045202,GO:0045211,GO:0045739,GO:0045893,GO:0045944,GO:0048156,GO:…	negative regulation of transcription by RNA polymerase II|amyloid-beta binding|chromatin binding|nucleus|nucleoplasm|cytoplasm|plasma membrane|double-strand break repair|regulation of transcription, DNA-templated|apoptotic process|cellular response to DNA damage stimulus|cell cycle arrest|signal transduction|axonogenesis|transcription factor binding|response to iron ion|positive regulation of neu…	oas05010	Alzheimer disease
APBB2	2283.22	1273.62	3292.82	2.58507	1.3702	2.23632e-50	1.74646e-49	Up	14.2249	13.6797	13.1404	4.79235	5.63196	4.58583	GeneID:101116399	amyloid beta precursor protein binding family B member 2	GO:0001540,GO:0001764,GO:0005634,GO:0005737,GO:0006355,GO:0007050,GO:0007411,GO:0008134,GO:0016020,GO:0030027,GO:0030198,GO:0030308,GO:0030426,GO:0035556,GO:0043065,GO:0043066,GO:0045202	amyloid-beta binding|neuron migration|nucleus|cytoplasm|regulation of transcription, DNA-templated|cell cycle arrest|axon guidance|transcription factor binding|membrane|lamellipodium|extracellular matrix organization|negative regulation of cell growth|growth cone|intracellular signal transduction|positive regulation of apoptotic process|negative regulation of apoptotic process|synapse
APC	3013.17	822.119	5204.21	6.33268	2.66282	7.89865e-98	1.78451e-96	Up	11.4791	10.7756	10.9672	1.68732	1.2829	1.97429	GeneID:101104664	APC regulator of WNT signaling pathway			oas04310,oas04390,oas04550,oas04810,oas04934,oas05165,oas05200,oas05206,oas05210,oas05213,oas05217,oas05224,oas05225,oas05226	Wnt signaling pathway|Hippo signaling pathway|Signaling pathways regulating pluripotency of stem cells|Regulation of actin cytoskeleton|Cushing syndrome|Human papillomavirus infection|Pathways in cancer|MicroRNAs in cancer|Colorectal cancer|Endometrial cancer|Basal cell carcinoma|Breast cancer|Hepatocellular carcinoma|Gastric cancer
APC2	959.028	1326.9	591.153	0.445499	-1.16651	6.60196e-33	2.93068e-32	Down	1.79598	1.8509	1.63141	3.79334	3.73857	3.66281	GeneID:101115458	APC regulator of WNT signaling pathway 2	GO:0000226,GO:0001708,GO:0005737,GO:0005794,GO:0005829,GO:0005874,GO:0005884,GO:0007026,GO:0007389,GO:0008013,GO:0008017,GO:0015630,GO:0016055,GO:0016342,GO:0016477,GO:0030496,GO:0030877,GO:0031258,GO:0045171,GO:0045295,GO:0045595,GO:0045732,GO:0048471,GO:0090090,GO:0090630,GO:0098794	microtubule cytoskeleton organization|cell fate specification|cytoplasm|Golgi apparatus|cytosol|microtubule|actin filament|negative regulation of microtubule depolymerization|pattern specification process|beta-catenin binding|microtubule binding|microtubule cytoskeleton|Wnt signaling pathway|catenin complex|cell migration|midbody|beta-catenin destruction complex|lamellipodium membrane|intercellul…	oas04310,oas04390,oas04550,oas04810,oas04934,oas05165,oas05200,oas05206,oas05210,oas05213,oas05217,oas05224,oas05225,oas05226	Wnt signaling pathway|Hippo signaling pathway|Signaling pathways regulating pluripotency of stem cells|Regulation of actin cytoskeleton|Cushing syndrome|Human papillomavirus infection|Pathways in cancer|MicroRNAs in cancer|Colorectal cancer|Endometrial cancer|Basal cell carcinoma|Breast cancer|Hepatocellular carcinoma|Gastric cancer
APCDD1	33.2884	48.0459	18.5309	0.385863	-1.37384	0.00202804	0.00293488	Down	0.201101	0.101138	0.100934	0.238492	0.350765	0.3959	GeneID:101104951	APC down-regulated 1	GO:0001942,GO:0005887,GO:0016055,GO:0017147,GO:0030178,GO:0042802,GO:0043615	hair follicle development|integral component of plasma membrane|Wnt signaling pathway|Wnt-protein binding|negative regulation of Wnt signaling pathway|identical protein binding|astrocyte cell migration
APEX2	1355.41	1870.73	840.085	0.449125	-1.15481	6.66329e-32	2.86179e-31	Down	10.6524	11.4613	11.0721	21.6089	23.2382	24.8642	GeneID:101116123	apurinic/apyrimidinic endodeoxyribonuclease 2	GO:0003677,GO:0003906,GO:0004519,GO:0004528,GO:0005634,GO:0005739,GO:0006284,GO:0006310,GO:0007049,GO:0008270,GO:0008311,GO:0140078	DNA binding|DNA-(apurinic or apyrimidinic site) endonuclease activity|endonuclease activity|phosphodiesterase I activity|nucleus|mitochondrion|base-excision repair|DNA recombination|cell cycle|zinc ion binding|double-stranded DNA 3'-5' exodeoxyribonuclease activity|class I DNA-(apurinic or apyrimidinic site) endonuclease activity	oas03410	Base excision repair
APH1A	3633.25	5064.22	2202.28	0.434904	-1.20123	7.46525e-39	4.02367e-38	Down	34.2406	34.8341	35.4231	69.6755	73.5285	83.3691	GeneID:101103438	aph-1 homolog A, gamma-secretase subunit	GO:0001656,GO:0004175,GO:0005739,GO:0005783,GO:0005789,GO:0005794,GO:0005886,GO:0005887,GO:0006509,GO:0007219,GO:0007220,GO:0008233,GO:0016021,GO:0016485,GO:0031293,GO:0032580,GO:0034205,GO:0042982,GO:0042987,GO:0043085,GO:0070765,GO:0099056	metanephros development|endopeptidase activity|mitochondrion|endoplasmic reticulum|endoplasmic reticulum membrane|Golgi apparatus|plasma membrane|integral component of plasma membrane|membrane protein ectodomain proteolysis|Notch signaling pathway|Notch receptor processing|peptidase activity|integral component of membrane|protein processing|membrane protein intracellular domain proteolysis|Golgi …	oas04330,oas05010	Notch signaling pathway|Alzheimer disease
API5	2656.45	1683.89	3629.01	2.15482	1.10756	7.95142e-45	5.29707e-44	Up	26.0329	25.9766	26.6341	12.3154	11.8224	10.3745	GeneID:101108774	apoptosis inhibitor 5
APLF	49.3958	17.7464	81.0451	4.55919	2.18878	2.44469e-07	4.34527e-07	Up	0.826103	0.892482	0.7883	0.0774084	0.316096	0.126007	GeneID:101116898	aprataxin and PNKP like factor	GO:0000012,GO:0000166,GO:0003906,GO:0004520,GO:0005634,GO:0005829,GO:0006302,GO:0006974,GO:0008408,GO:0035861,GO:0046872,GO:0140078	single strand break repair|nucleotide binding|DNA-(apurinic or apyrimidinic site) endonuclease activity|endodeoxyribonuclease activity|nucleus|cytosol|double-strand break repair|cellular response to DNA damage stimulus|3'-5' exonuclease activity|site of double-strand break|metal ion binding|class I DNA-(apurinic or apyrimidinic site) endonuclease activity
APLP1	73.3354	107.335	39.3356	0.366588	-1.44777	2.23304e-07	3.97356e-07	Down	0.365219	0.423013	0.533251	1.113	1.15377	1.13596	GeneID:101105352	amyloid beta precursor like protein 1	GO:0005604,GO:0005886,GO:0006897,GO:0006915,GO:0007155,GO:0007399,GO:0008201,GO:0009887,GO:0016021,GO:0031694,GO:0031695,GO:0031696,GO:0042802,GO:0046914,GO:0048471,GO:0071874,GO:0106072	basement membrane|plasma membrane|endocytosis|apoptotic process|cell adhesion|nervous system development|heparin binding|animal organ morphogenesis|integral component of membrane|alpha-2A adrenergic receptor binding|alpha-2B adrenergic receptor binding|alpha-2C adrenergic receptor binding|identical protein binding|transition metal ion binding|perinuclear region of cytoplasm|cellular response to n…
APOBR	16.3438	9.87655	22.8111	2.30742	1.20628	0.0337081	0.0440482	Up	0.121191	0.162533	0.182479	0.0830407	0.0569111	0.0511906	GeneID:101122247	apolipoprotein B receptor	GO:0005886,GO:0006641,GO:0006869,GO:0008203,GO:0016020,GO:0030229,GO:0034361,GO:0034362,GO:0034447,GO:0042627	plasma membrane|triglyceride metabolic process|lipid transport|cholesterol metabolic process|membrane|very-low-density lipoprotein particle receptor activity|very-low-density lipoprotein particle|low-density lipoprotein particle|very-low-density lipoprotein particle clearance|chylomicron
APOO	465.987	306.325	625.65	2.04203	1.03	3.59309e-12	7.74013e-12	Up	14.8898	13.8953	15.58	8.53804	5.8616	6.15361	GeneID:101113910	apolipoprotein O	GO:0000139,GO:0005576,GO:0005789,GO:0005829,GO:0006869,GO:0031305,GO:0034361,GO:0034362,GO:0034364,GO:0042407,GO:0061617	Golgi membrane|extracellular region|endoplasmic reticulum membrane|cytosol|lipid transport|integral component of mitochondrial inner membrane|very-low-density lipoprotein particle|low-density lipoprotein particle|high-density lipoprotein particle|cristae formation|MICOS complex
APOOL	298.413	134.026	462.8	3.453	1.78785	9.09701e-22	2.76092e-21	Up	10.0387	10.568	9.24428	3.55136	1.99751	2.62772	GeneID:101123352	apolipoprotein O like	GO:0042407,GO:0061617	cristae formation|MICOS complex
APPBP2	1779.12	649.427	2908.8	4.47801	2.16286	5.04584e-140	2.40281e-138	Up	11.7764	11.9649	11.2519	2.54012	2.57789	2.26934	GeneID:101108927	amyloid beta precursor protein binding protein 2	GO:0003777,GO:0005634,GO:0005737,GO:0005874,GO:0005875,GO:0006886,GO:0030659,GO:0046907	microtubule motor activity|nucleus|cytoplasm|microtubule|microtubule associated complex|intracellular protein transport|cytoplasmic vesicle membrane|intracellular transport
APPL1	1912.9	410.171	3415.63	8.32807	3.05798	3.6383e-28	1.37217e-27	Up	15.6132	16.0396	15.6315	2.2646	1.15734	1.93887	GeneID:101109218	adaptor protein, phosphotyrosine interacting with PH domain and leucine zipper 1	GO:0005634,GO:0005769,GO:0005829,GO:0007049,GO:0007165,GO:0008283,GO:0008286,GO:0010008,GO:0012506,GO:0023052,GO:0031901,GO:0042802,GO:0043422,GO:0044877,GO:0046324,GO:0070062,GO:0097192,GO:1903076	nucleus|early endosome|cytosol|cell cycle|signal transduction|cell proliferation|insulin receptor signaling pathway|endosome membrane|vesicle membrane|signaling|early endosome membrane|identical protein binding|protein kinase B binding|protein-containing complex binding|regulation of glucose import|extracellular exosome|extrinsic apoptotic signaling pathway in absence of ligand|regulation of prot…	oas04211,oas05200,oas05210	Longevity regulating pathway|Pathways in cancer|Colorectal cancer
APRT	1196.1	1711.98	680.223	0.397408	-1.33131	2.17421e-34	1.01318e-33	Down	21.0966	20.9357	22.7527	47.9532	48.6795	57.0768	GeneID:101108335	adenine phosphoribosyltransferase	GO:0002055,GO:0003999,GO:0005654,GO:0005829,GO:0006166,GO:0006168,GO:0007625,GO:0016208,GO:0044209	adenine binding|adenine phosphoribosyltransferase activity|nucleoplasm|cytosol|purine ribonucleoside salvage|adenine salvage|grooming behavior|AMP binding|AMP salvage	oas00230	Purine metabolism
APTX	442.174	610.542	273.807	0.448553	-1.15665	9.91404e-16	2.42753e-15	Down	4.00994	4.1247	4.43534	9.81968	7.37591	9.26147	GeneID:101105385	aprataxin	GO:0000012,GO:0003697,GO:0003725,GO:0005634,GO:0005654,GO:0005730,GO:0006302,GO:0030983,GO:0033699,GO:0046872,GO:0120108,GO:1990165	single strand break repair|single-stranded DNA binding|double-stranded RNA binding|nucleus|nucleoplasm|nucleolus|double-strand break repair|mismatched DNA binding|DNA 5'-adenosine monophosphate hydrolase activity|metal ion binding|DNA-3'-diphospho-5'-guanosine diphosphatase|single-strand break-containing DNA binding
AQP11	14.3117	21.0193	7.6042	0.361462	-1.46808	0.019886	0.0265679	Down	0.0703568	0.127382	0.127125	0.387153	0.277531	0.187226	GeneID:101111499	aquaporin 11	GO:0005783,GO:0005829,GO:0005886,GO:0009986,GO:0015250,GO:0016021,GO:0030425,GO:0048388,GO:0051260,GO:0072014	endoplasmic reticulum|cytosol|plasma membrane|cell surface|water channel activity|integral component of membrane|dendrite|endosomal lumen acidification|protein homooligomerization|proximal tubule development
AQR	1583.9	694.501	2473.29	3.56162	1.83253	2.29563e-102	5.57855e-101	Up	5.20704	5.10727	5.10106	1.43097	1.30077	1.35729	GeneID:101103571	aquarius intron-binding spliceosomal factor	GO:0000398,GO:0003723,GO:0003729,GO:0004386,GO:0005524,GO:0005634,GO:0005654,GO:0005681,GO:0006283,GO:0016020,GO:0071007,GO:0071013	mRNA splicing, via spliceosome|RNA binding|mRNA binding|helicase activity|ATP binding|nucleus|nucleoplasm|spliceosomal complex|transcription-coupled nucleotide-excision repair|membrane|U2-type catalytic step 2 spliceosome|catalytic step 2 spliceosome	oas03040	Spliceosome
ARAP2	451.243	53.0329	849.453	16.0268	4.00241	4.19869e-22	1.29176e-21	Up	3.23807	3.04225	2.88608	0.239691	0.0835489	0.216434	GeneID:101109800	ArfGAP with RhoGAP domain, ankyrin repeat and PH domain 2	GO:0005096,GO:0005547,GO:0005829,GO:0007165,GO:0046872,GO:0051056	GTPase activator activity|phosphatidylinositol-3,4,5-trisphosphate binding|cytosol|signal transduction|metal ion binding|regulation of small GTPase mediated signal transduction	oas04144	Endocytosis
ARCN1	10575.5	5633.22	15517.9	2.75453	1.4618	4.69312e-72	6.57827e-71	Up	115.081	113.217	117.822	40.9146	43.5829	34.3748	GeneID:101103008	archain 1	GO:0000139,GO:0005783,GO:0005829,GO:0006888,GO:0006890,GO:0006891,GO:0008344,GO:0015031,GO:0021691,GO:0030126,GO:0030137,GO:0043473,GO:0051645	Golgi membrane|endoplasmic reticulum|cytosol|ER to Golgi vesicle-mediated transport|retrograde vesicle-mediated transport, Golgi to ER|intra-Golgi vesicle-mediated transport|adult locomotory behavior|protein transport|cerebellar Purkinje cell layer maturation|COPI vesicle coat|COPI-coated vesicle|pigmentation|Golgi localization
ARF3	7360.26	9823.27	4897.25	0.498553	-1.00418	7.75518e-41	4.47679e-40	Down	35.5422	37.2942	37.8846	69.8025	66.5381	73.2526	GeneID:100302303	ADP ribosylation factor 3	GO:0005525,GO:0005737,GO:0005794,GO:0005886,GO:0006886,GO:0006893,GO:0016192,GO:0048471	GTP binding|cytoplasm|Golgi apparatus|plasma membrane|intracellular protein transport|Golgi to plasma membrane transport|vesicle-mediated transport|perinuclear region of cytoplasm	oas04144	Endocytosis
ARF5	677.845	918.261	437.429	0.476488	-1.06949	3.42698e-19	9.51467e-19	Down	20.6119	20.7822	24.3709	42.4954	41.0905	46.6188	GeneID:100302305	ADP ribosylation factor 5	GO:0005525,GO:0005737,GO:0005794,GO:0005886,GO:0006886,GO:0006890,GO:0006893,GO:0016192,GO:0048471	GTP binding|cytoplasm|Golgi apparatus|plasma membrane|intracellular protein transport|retrograde vesicle-mediated transport, Golgi to ER|Golgi to plasma membrane transport|vesicle-mediated transport|perinuclear region of cytoplasm	oas04144	Endocytosis
ARFGAP1	4272.66	5963.83	2581.5	0.432887	-1.20794	7.21222e-46	4.93958e-45	Down	19.4559	19.02	20.1463	41.8037	39.9628	45.9885	GeneID:101110163	ADP ribosylation factor GTPase activating protein 1	GO:0000139,GO:0005096,GO:0005829,GO:0006888,GO:0006890,GO:0014069,GO:0015031,GO:0030100,GO:0032012,GO:0036498,GO:0045202,GO:0046872	Golgi membrane|GTPase activator activity|cytosol|ER to Golgi vesicle-mediated transport|retrograde vesicle-mediated transport, Golgi to ER|postsynaptic density|protein transport|regulation of endocytosis|regulation of ARF protein signal transduction|IRE1-mediated unfolded protein response|synapse|metal ion binding	oas04144	Endocytosis
ARFGAP2	2012.75	3118.68	906.831	0.290806	-1.78187	6.9247e-74	1.00654e-72	Down	8.76195	8.06093	8.5729	26.305	25.9536	30.115	GeneID:101119250	ADP ribosylation factor GTPase activating protein 2	GO:0000139,GO:0005096,GO:0005793,GO:0005802,GO:0006888,GO:0006890,GO:0015031,GO:0046872,GO:0048205	Golgi membrane|GTPase activator activity|endoplasmic reticulum-Golgi intermediate compartment|trans-Golgi network|ER to Golgi vesicle-mediated transport|retrograde vesicle-mediated transport, Golgi to ER|protein transport|metal ion binding|COPI coating of Golgi vesicle	oas04144	Endocytosis
ARFGAP3	2383.43	1561.98	3204.88	2.05172	1.03683	9.87264e-46	6.73234e-45	Up	32.2774	32.3359	32.1107	15.236	15.1107	14.2033	GeneID:101115447	ADP ribosylation factor GTPase activating protein 3	GO:0000139,GO:0005096,GO:0005793,GO:0005802,GO:0005829,GO:0006888,GO:0006890,GO:0009306,GO:0046872,GO:0048205	Golgi membrane|GTPase activator activity|endoplasmic reticulum-Golgi intermediate compartment|trans-Golgi network|cytosol|ER to Golgi vesicle-mediated transport|retrograde vesicle-mediated transport, Golgi to ER|protein secretion|metal ion binding|COPI coating of Golgi vesicle	oas04144	Endocytosis
ARFGEF1	1845.18	445.858	3244.49	7.27634	2.86321	7.41039e-214	1.3974e-211	Up	12.1344	12.2532	11.6332	1.47249	1.70863	1.49591	GeneID:101102247	ADP ribosylation factor guanine nucleotide exchange factor 1	GO:0000139,GO:0005086,GO:0005730,GO:0005802,GO:0005829,GO:0007030,GO:0010256,GO:0015031,GO:0016192,GO:0016363,GO:0030532,GO:0030837,GO:0032012,GO:0034237,GO:0034260,GO:0048471,GO:0090284,GO:0090303,GO:2000114	Golgi membrane|ARF guanyl-nucleotide exchange factor activity|nucleolus|trans-Golgi network|cytosol|Golgi organization|endomembrane system organization|protein transport|vesicle-mediated transport|nuclear matrix|small nuclear ribonucleoprotein complex|negative regulation of actin filament polymerization|regulation of ARF protein signal transduction|protein kinase A regulatory subunit binding|nega…	oas04144	Endocytosis
ARFGEF2	1918.54	1128.01	2709.07	2.40145	1.2639	1.80608e-39	9.94293e-39	Up	8.64592	8.19521	7.82304	3.01338	3.64282	3.04999	GeneID:101116164	ADP ribosylation factor guanine nucleotide exchange factor 2	GO:0000139,GO:0001881,GO:0005085,GO:0005086,GO:0005802,GO:0005815,GO:0005829,GO:0005879,GO:0006887,GO:0006893,GO:0007032,GO:0010256,GO:0015031,GO:0016020,GO:0016192,GO:0017022,GO:0030054,GO:0031410,GO:0032012,GO:0032279,GO:0032280,GO:0032760,GO:0034237,GO:0035556,GO:0043197,GO:0048471,GO:0050811,GO:0055037	Golgi membrane|receptor recycling|guanyl-nucleotide exchange factor activity|ARF guanyl-nucleotide exchange factor activity|trans-Golgi network|microtubule organizing center|cytosol|axonemal microtubule|exocytosis|Golgi to plasma membrane transport|endosome organization|endomembrane system organization|protein transport|membrane|vesicle-mediated transport|myosin binding|cell junction|cytoplasmic …	oas04144	Endocytosis
ARFIP1	1009.33	526.802	1491.85	2.83181	1.50173	2.93908e-41	1.72407e-40	Up	10.5522	11.5886	10.3402	4.14073	3.22261	3.47934	GeneID:101103593	ADP ribosylation factor interacting protein 1	GO:0000139,GO:0005543,GO:0005737,GO:0005829,GO:0006886,GO:0019904,GO:0032588,GO:0050708,GO:0070273	Golgi membrane|phospholipid binding|cytoplasm|cytosol|intracellular protein transport|protein domain specific binding|trans-Golgi network membrane|regulation of protein secretion|phosphatidylinositol-4-phosphate binding
ARFRP1	1634.72	2295.2	974.247	0.424535	-1.23605	9.59329e-30	3.83379e-29	Down	15.7864	14.0406	15.5537	31.12	31.7587	37.9021	GeneID:100302308	ADP ribosylation factor related protein 1	GO:0005525,GO:0005794,GO:0005802,GO:0005829,GO:0006886,GO:0007369,GO:0016020,GO:0033365,GO:0034067,GO:0042147,GO:0043001	GTP binding|Golgi apparatus|trans-Golgi network|cytosol|intracellular protein transport|gastrulation|membrane|protein localization to organelle|protein localization to Golgi apparatus|retrograde transport, endosome to Golgi|Golgi to plasma membrane protein transport
ARG2	33.3649	21.4244	45.3053	2.11349	1.07963	0.00576816	0.00805879	Up	0.919329	0.77373	0.885165	0.409404	0.405283	0.33879	GeneID:780468	arginase 2	GO:0000050,GO:0002250,GO:0004053,GO:0005737,GO:0005739,GO:0019547,GO:0030145,GO:0045087	urea cycle|adaptive immune response|arginase activity|cytoplasm|mitochondrion|arginine catabolic process to ornithine|manganese ion binding|innate immune response	oas00220,oas00330,oas05146	Arginine biosynthesis|Arginine and proline metabolism|Amoebiasis
ARGLU1	2019.01	1122.17	2915.84	2.59881	1.37785	1.25724e-59	1.2857e-58	Up	45.6528	44.0323	44.1407	15.2894	16.5567	16.7684	GeneID:101115718	arginine and glutamate rich 1
ARHGAP11A	822.495	319.953	1325.04	4.14168	2.05021	8.59716e-86	1.56688e-84	Up	7.68781	8.00039	7.56032	1.87695	1.68421	1.74276	GeneID:101103069	Rho GTPase activating protein 11A	GO:0005096,GO:0005829,GO:0007165,GO:0051056	GTPase activator activity|cytosol|signal transduction|regulation of small GTPase mediated signal transduction
ARHGAP12	765.525	381.74	1149.31	3.00893	1.58925	1.18865e-32	5.23057e-32	Up	6.32534	6.30219	6.31672	1.94882	2.43958	1.57002	GeneID:101114797	Rho GTPase activating protein 12	GO:0001891,GO:0002011,GO:0005096,GO:0005737,GO:0005829,GO:0006911,GO:0007015,GO:0007165,GO:0043087,GO:0051056,GO:0051058	phagocytic cup|morphogenesis of an epithelial sheet|GTPase activator activity|cytoplasm|cytosol|phagocytosis, engulfment|actin filament organization|signal transduction|regulation of GTPase activity|regulation of small GTPase mediated signal transduction|negative regulation of small GTPase mediated signal transduction
ARHGAP18	257.189	120.492	393.886	3.274	1.71106	1.30282e-18	3.54614e-18	Up	3.02098	3.03864	3.12509	0.831399	0.664202	1.14698	GeneID:101118792	Rho GTPase activating protein 18	GO:0005096,GO:0005737,GO:0005829,GO:0005886,GO:0007264,GO:0008360,GO:0016607,GO:0030833,GO:0032956,GO:0045296,GO:0051056,GO:2000145	GTPase activator activity|cytoplasm|cytosol|plasma membrane|small GTPase mediated signal transduction|regulation of cell shape|nuclear speck|regulation of actin filament polymerization|regulation of actin cytoskeleton organization|cadherin binding|regulation of small GTPase mediated signal transduction|regulation of cell motility
ARHGAP22	1325.67	1907.11	744.228	0.390301	-1.35734	3.41866e-36	1.69115e-35	Down	6.15363	5.64518	7.00459	15.2473	14.0303	16.1759	GeneID:101116628	Rho GTPase activating protein 22	GO:0001525,GO:0005096,GO:0005634,GO:0005829,GO:0005925,GO:0007165,GO:0030154,GO:0051056,GO:0098978,GO:0099175	angiogenesis|GTPase activator activity|nucleus|cytosol|focal adhesion|signal transduction|cell differentiation|regulation of small GTPase mediated signal transduction|glutamatergic synapse|regulation of postsynapse organization
ARHGAP23	2846.03	3821.83	1870.22	0.489384	-1.03096	6.21771e-37	3.1451e-36	Down	7.75623	8.40671	8.39405	15.1978	15.7644	16.3965	GeneID:101123648	Rho GTPase activating protein 23	GO:0005096,GO:0005829,GO:0007165,GO:0051056,GO:0070062	GTPase activator activity|cytosol|signal transduction|regulation of small GTPase mediated signal transduction|extracellular exosome
ARHGAP25	29.5441	42.5537	16.5345	0.388528	-1.36391	0.0041832	0.00590567	Down	0.0635181	0.219049	0.173063	0.327139	0.434636	0.344954	GeneID:101109429	Rho GTPase activating protein 25	GO:0001891,GO:0005096,GO:0005829,GO:0006911,GO:0007015,GO:0007165,GO:0051056,GO:0051058	phagocytic cup|GTPase activator activity|cytosol|phagocytosis, engulfment|actin filament organization|signal transduction|regulation of small GTPase mediated signal transduction|negative regulation of small GTPase mediated signal transduction
ARHGAP27	16.3663	23.1632	9.5693	0.41359	-1.27373	0.0464196	0.0596992	Down	0.0179722	0.0482061	0.108244	0.119357	0.129409	0.148032	GeneID:101119739	Rho GTPase activating protein 27	GO:0005096,GO:0005622,GO:0005634,GO:0005654,GO:0005737,GO:0005768,GO:0005829,GO:0006898,GO:0007165,GO:0016020,GO:0017124,GO:0043087,GO:0043547	GTPase activator activity|intracellular|nucleus|nucleoplasm|cytoplasm|endosome|cytosol|receptor-mediated endocytosis|signal transduction|membrane|SH3 domain binding|regulation of GTPase activity|positive regulation of GTPase activity
ARHGAP28	4412.38	1023.03	7801.73	7.62614	2.93095	0	0	Up	32.9157	33.3688	31.071	4.16901	3.98021	3.91425	GeneID:101102444	Rho GTPase activating protein 28	GO:0005096,GO:0005737,GO:0005829,GO:0007165,GO:0030833,GO:0032956,GO:0051056,GO:0051497,GO:1904425	GTPase activator activity|cytoplasm|cytosol|signal transduction|regulation of actin filament polymerization|regulation of actin cytoskeleton organization|regulation of small GTPase mediated signal transduction|negative regulation of stress fiber assembly|negative regulation of GTP binding
ARHGAP29	1527.06	687.484	2366.63	3.44135	1.78298	5.77882e-75	8.62129e-74	Up	12.874	11.5949	12.4227	3.47653	3.70219	2.95993	GeneID:101107830	Rho GTPase activating protein 29	GO:0005096,GO:0005737,GO:0030165,GO:0032991,GO:0035556,GO:0046872	GTPase activator activity|cytoplasm|PDZ domain binding|protein-containing complex|intracellular signal transduction|metal ion binding
ARHGAP33	83.378	113.519	53.2371	0.468974	-1.09242	6.6338e-05	0.000104986	Down	0.235895	0.393375	0.373885	0.636074	0.740449	0.643077	GeneID:101105098	Rho GTPase activating protein 33	GO:0005096,GO:0005737,GO:0005829,GO:0005886,GO:0007264,GO:0009636,GO:0015031,GO:0019901,GO:0032991,GO:0035091,GO:0043197,GO:0051056,GO:0061001	GTPase activator activity|cytoplasm|cytosol|plasma membrane|small GTPase mediated signal transduction|response to toxic substance|protein transport|protein kinase binding|protein-containing complex|phosphatidylinositol binding|dendritic spine|regulation of small GTPase mediated signal transduction|regulation of dendritic spine morphogenesis
ARHGAP42	2118.45	640.93	3595.97	5.61097	2.48825	2.77023e-184	2.90218e-182	Up	12.5959	12.0687	11.3222	2.03502	2.02384	2.00092	GeneID:101121370	Rho GTPase activating protein 42	GO:0003085,GO:0005096,GO:0007165,GO:0035024,GO:0090630,GO:1904694	negative regulation of systemic arterial blood pressure|GTPase activator activity|signal transduction|negative regulation of Rho protein signal transduction|activation of GTPase activity|negative regulation of vascular smooth muscle contraction
ARHGAP5	1669.58	228.136	3111.03	13.6402	3.76979	3.49963e-31	1.47281e-30	Up	10.9268	9.97532	10.1235	0.839201	0.423098	0.881283	GeneID:101116866	Rho GTPase activating protein 5	GO:0003924,GO:0005096,GO:0005525,GO:0005737,GO:0005783,GO:0005829,GO:0005886,GO:0007155,GO:0007266,GO:0030879,GO:0042169,GO:0051056	GTPase activity|GTPase activator activity|GTP binding|cytoplasm|endoplasmic reticulum|cytosol|plasma membrane|cell adhesion|Rho protein signal transduction|mammary gland development|SH2 domain binding|regulation of small GTPase mediated signal transduction	oas04510,oas04670	Focal adhesion|Leukocyte transendothelial migration
ARHGAP8	139.147	189.657	88.6366	0.467439	-1.09715	5.19495e-08	9.50727e-08	Down	1.34855	1.60763	1.52081	2.92216	3.01784	3.10128	GeneID:101108216	Rho GTPase activating protein 8	GO:0005096,GO:0005829,GO:0007165,GO:0051056,GO:0070374	GTPase activator activity|cytosol|signal transduction|regulation of small GTPase mediated signal transduction|positive regulation of ERK1 and ERK2 cascade
ARHGDIA	26940.8	37884	15997.6	0.422281	-1.24372	2.79113e-69	3.67893e-68	Down	164.637	170.119	171.103	369.827	364.764	395.89	GeneID:101114713	Rho GDP dissociation inhibitor alpha	GO:0001772,GO:0005094,GO:0005096,GO:0005634,GO:0005829,GO:0007266,GO:0016020,GO:0032880,GO:0048365,GO:0071526	immunological synapse|Rho GDP-dissociation inhibitor activity|GTPase activator activity|nucleus|cytosol|Rho protein signal transduction|membrane|regulation of protein localization|Rac GTPase binding|semaphorin-plexin signaling pathway	oas04722,oas04962	Neurotrophin signaling pathway|Vasopressin-regulated water reabsorption
ARHGEF1	3326.13	4552.64	2099.62	0.461211	-1.1165	2.53206e-48	1.86224e-47	Down	15.971	15.7296	15.4081	31.9542	31.2018	33.2751	GeneID:101104265	Rho guanine nucleotide exchange factor 1	GO:0001664,GO:0003723,GO:0005085,GO:0005089,GO:0005096,GO:0005737,GO:0005829,GO:0005886,GO:0007186,GO:0007266,GO:0008283,GO:0035023,GO:0043065,GO:0051056	G protein-coupled receptor binding|RNA binding|guanyl-nucleotide exchange factor activity|Rho guanyl-nucleotide exchange factor activity|GTPase activator activity|cytoplasm|cytosol|plasma membrane|G protein-coupled receptor signaling pathway|Rho protein signal transduction|cell proliferation|regulation of Rho protein signal transduction|positive regulation of apoptotic process|regulation of small…	oas04270,oas04611,oas04810,oas04928,oas05163,oas05200,oas05205	Vascular smooth muscle contraction|Platelet activation|Regulation of actin cytoskeleton|Parathyroid hormone synthesis, secretion and action|Human cytomegalovirus infection|Pathways in cancer|Proteoglycans in cancer
ARHGEF12	2859.77	1319.56	4399.98	3.33397	1.73724	2.13767e-63	2.42836e-62	Up	13.235	13.889	12.3066	3.47628	4.3821	3.32504	GeneID:101117190	Rho guanine nucleotide exchange factor 12			oas04270,oas04360,oas04611,oas04625,oas04810,oas05152,oas05163,oas05200,oas05205	Vascular smooth muscle contraction|Axon guidance|Platelet activation|C-type lectin receptor signaling pathway|Regulation of actin cytoskeleton|Tuberculosis|Human cytomegalovirus infection|Pathways in cancer|Proteoglycans in cancer
ARHGEF17	5185.61	6935.82	3435.39	0.495316	-1.01358	6.52609e-49	4.8861e-48	Down	12.0263	12.0179	11.3726	22.4908	22.5805	22.4684	GeneID:101104090	Rho guanine nucleotide exchange factor 17
ARHGEF5	1222.07	1736.74	707.397	0.407329	-1.29573	1.67798e-49	1.27727e-48	Down	3.46215	3.61361	3.69192	8.27363	8.48725	8.20691	GeneID:101105817	Rho guanine nucleotide exchange factor 5	GO:0002102,GO:0002408,GO:0005085,GO:0005089,GO:0005525,GO:0005634,GO:0005654,GO:0005737,GO:0005829,GO:0005886,GO:0007186,GO:0008289,GO:0030036,GO:0030054,GO:0032956,GO:0035023,GO:0035556,GO:0042995,GO:0043065,GO:0043087,GO:0043507,GO:0043547,GO:0051056,GO:0051091,GO:0051493,GO:0051496,GO:0071803,GO:0071944,GO:1904591	podosome|myeloid dendritic cell chemotaxis|guanyl-nucleotide exchange factor activity|Rho guanyl-nucleotide exchange factor activity|GTP binding|nucleus|nucleoplasm|cytoplasm|cytosol|plasma membrane|G protein-coupled receptor signaling pathway|lipid binding|actin cytoskeleton organization|cell junction|regulation of actin cytoskeleton organization|regulation of Rho protein signal transduction|int…
ARHGEF6	220.771	97.3257	344.216	3.5361	1.82216	1.76543e-24	5.87771e-24	Up	1.91031	1.56315	1.91759	0.465345	0.5237	0.451432	GeneID:101104043	Rac/Cdc42 guanine nucleotide exchange factor 6	GO:0005085,GO:0005089,GO:0005096,GO:0005829,GO:0006915,GO:0007186,GO:0007254,GO:0030027,GO:0030032,GO:0035023,GO:0043065,GO:0051056	guanyl-nucleotide exchange factor activity|Rho guanyl-nucleotide exchange factor activity|GTPase activator activity|cytosol|apoptotic process|G protein-coupled receptor signaling pathway|JNK cascade|lamellipodium|lamellipodium assembly|regulation of Rho protein signal transduction|positive regulation of apoptotic process|regulation of small GTPase mediated signal transduction	oas04810,oas05212	Regulation of actin cytoskeleton|Pancreatic cancer
ARHGEF9	181.257	87.6591	274.856	3.13029	1.6463	2.79319e-14	6.48775e-14	Up	0.897425	0.819772	0.827306	0.309873	0.295287	0.165359	GeneID:101110030	Cdc42 guanine nucleotide exchange factor 9	GO:0005089,GO:0005829,GO:0014069,GO:0030054,GO:0035023,GO:0045211,GO:0098982,GO:0099150	Rho guanyl-nucleotide exchange factor activity|cytosol|postsynaptic density|cell junction|regulation of Rho protein signal transduction|postsynaptic membrane|GABA-ergic synapse|regulation of postsynaptic specialization assembly
ARID2	713.171	175.725	1250.62	7.1267	2.83323	3.41461e-82	5.88936e-81	Up	4.79691	4.91649	4.67055	0.636786	0.484358	0.782047	GeneID:101112969	AT-rich interaction domain 2	GO:0000981,GO:0003007,GO:0003677,GO:0005654,GO:0005886,GO:0006337,GO:0008285,GO:0030336,GO:0042592,GO:0046872,GO:0048568,GO:0060038,GO:0060982	DNA-binding transcription factor activity, RNA polymerase II-specific|heart morphogenesis|DNA binding|nucleoplasm|plasma membrane|nucleosome disassembly|negative regulation of cell proliferation|negative regulation of cell migration|homeostatic process|metal ion binding|embryonic organ development|cardiac muscle cell proliferation|coronary artery morphogenesis	oas05225	Hepatocellular carcinoma
ARID3B	32.3986	44.2793	20.5178	0.463371	-1.10976	0.00601704	0.00839489	Down	0.161763	0.136675	0.103923	0.263971	0.273469	0.282878	GeneID:101110365	AT-rich interaction domain 3B	GO:0000977,GO:0000978,GO:0000980,GO:0000981,GO:0001077,GO:0001205,GO:0001228,GO:0003677,GO:0005634,GO:0005654	RNA polymerase II regulatory region sequence-specific DNA binding|RNA polymerase II proximal promoter sequence-specific DNA binding|RNA polymerase II distal enhancer sequence-specific DNA binding|DNA-binding transcription factor activity, RNA polymerase II-specific|proximal promoter DNA-binding transcription activator activity, RNA polymerase II-specific|distal enhancer DNA-binding transcription …
ARID4A	444.588	63.9412	825.234	12.9333	3.69302	6.59801e-111	1.85518e-109	Up	3.6944	4.05507	3.81046	0.293547	0.21686	0.333556	GeneID:101122697	AT-rich interaction domain 4A	GO:0000981,GO:0003677,GO:0003700,GO:0004407,GO:0005634,GO:0005654,GO:0005829,GO:0005886,GO:0006349,GO:0006357,GO:0006366,GO:0007283,GO:0017053,GO:0034773,GO:0036124,GO:0044212,GO:0045892,GO:0045944,GO:0048821,GO:0080182,GO:0097368	DNA-binding transcription factor activity, RNA polymerase II-specific|DNA binding|DNA-binding transcription factor activity|histone deacetylase activity|nucleus|nucleoplasm|cytosol|plasma membrane|regulation of gene expression by genetic imprinting|regulation of transcription by RNA polymerase II|transcription by RNA polymerase II|spermatogenesis|transcriptional repressor complex|histone H4-K20 t…
ARID4B	996.351	102.855	1889.85	18.4122	4.20259	9.92742e-147	5.40013e-145	Up	7.81766	7.38011	6.8289	0.408407	0.241856	0.478519	GeneID:101116701	AT-rich interaction domain 4B	GO:0000981,GO:0004407,GO:0005634,GO:0005654,GO:0005737,GO:0006349,GO:0006357,GO:0007283,GO:0034773,GO:0036124,GO:0044212,GO:0045944,GO:0097368	DNA-binding transcription factor activity, RNA polymerase II-specific|histone deacetylase activity|nucleus|nucleoplasm|cytoplasm|regulation of gene expression by genetic imprinting|regulation of transcription by RNA polymerase II|spermatogenesis|histone H4-K20 trimethylation|histone H3-K9 trimethylation|transcription regulatory region DNA binding|positive regulation of transcription by RNA polyme…
ARID5A	25.0101	37.4691	12.5512	0.334896	-1.57822	0.00196906	0.00285333	Down	0.168907	0.0728117	0.217993	0.457855	0.532566	0.309588	GeneID:101114695	AT-rich interaction domain 5A	GO:0003723,GO:0005634,GO:0006357,GO:0044212,GO:0045087	RNA binding|nucleus|regulation of transcription by RNA polymerase II|transcription regulatory region DNA binding|innate immune response
ARID5B	7664.89	3791.84	11537.9	3.04256	1.60529	7.32143e-73	1.04277e-71	Up	40.4772	40.1912	38.1602	12.513	13.8765	10.5661	GeneID:101121742	AT-rich interaction domain 5B	GO:0003713,GO:0005634,GO:0006357,GO:0044212,GO:0051091,GO:0060612	transcription coactivator activity|nucleus|regulation of transcription by RNA polymerase II|transcription regulatory region DNA binding|positive regulation of DNA-binding transcription factor activity|adipose tissue development
ARIH1	1391.09	864.836	1917.34	2.21653	1.1483	8.73505e-35	4.13869e-34	Up	10.6363	9.97708	10.0522	4.37264	4.77438	3.93419	GeneID:101116578	ariadne RBR E3 ubiquitin protein ligase 1	GO:0000151,GO:0000209,GO:0004842,GO:0005737,GO:0006511,GO:0008270,GO:0015030,GO:0016567,GO:0016604,GO:0019005,GO:0031462,GO:0031463,GO:0031464,GO:0031624,GO:0031625,GO:0032436,GO:0061630,GO:0097413	ubiquitin ligase complex|protein polyubiquitination|ubiquitin-protein transferase activity|cytoplasm|ubiquitin-dependent protein catabolic process|zinc ion binding|Cajal body|protein ubiquitination|nuclear body|SCF ubiquitin ligase complex|Cul2-RING ubiquitin ligase complex|Cul3-RING ubiquitin ligase complex|Cul4A-RING E3 ubiquitin ligase complex|ubiquitin conjugating enzyme binding|ubiquitin pro…
ARL1	2466.14	983.096	3949.19	4.01624	2.00584	2.82762e-87	5.25507e-86	Up	35.7964	34.0702	35.386	9.8117	7.79842	7.18991	GeneID:100145883	ADP ribosylation factor like GTPase 1	GO:0000139,GO:0003924,GO:0005525,GO:0005737,GO:0005794,GO:0005802,GO:0005829,GO:0006886,GO:0007030,GO:0008047,GO:0009404,GO:0016192,GO:0019904,GO:0031584,GO:0034067,GO:0042147,GO:0046872	Golgi membrane|GTPase activity|GTP binding|cytoplasm|Golgi apparatus|trans-Golgi network|cytosol|intracellular protein transport|Golgi organization|enzyme activator activity|toxin metabolic process|vesicle-mediated transport|protein domain specific binding|activation of phospholipase D activity|protein localization to Golgi apparatus|retrograde transport, endosome to Golgi|metal ion binding
ARL10	411.205	589.65	232.759	0.394817	-1.34074	1.57022e-22	4.89586e-22	Down	1.59355	1.36243	1.73292	3.88677	3.54209	3.78623	GeneID:101105498	ADP ribosylation factor like GTPase 10	GO:0005525,GO:0005622	GTP binding|intracellular
ARL13B	194.901	43.857	345.945	7.88306	2.97876	1.48344e-50	1.16428e-49	Up	2.47832	2.49999	2.51644	0.325251	0.301854	0.271513	GeneID:101123516	ADP ribosylation factor like GTPase 13B	GO:0001947,GO:0005525,GO:0005929,GO:0005930,GO:0007224,GO:0009953,GO:0010226,GO:0021532,GO:0021830,GO:0021943,GO:0031514,GO:0060170,GO:0060271,GO:0070986,GO:0097500,GO:0097730,GO:1905515	heart looping|GTP binding|cilium|axoneme|smoothened signaling pathway|dorsal/ventral pattern formation|response to lithium ion|neural tube patterning|interneuron migration from the subpallium to the cortex|formation of radial glial scaffolds|motile cilium|ciliary membrane|cilium assembly|left/right axis specification|receptor localization to non-motile cilium|non-motile cilium|non-motile cilium a…
ARL15	223.625	109.667	337.584	3.07912	1.62252	4.62834e-20	1.32507e-19	Up	2.73062	2.58987	3.07851	0.972471	0.739342	0.865052	GeneID:101118640	ADP ribosylation factor like GTPase 15	GO:0005525,GO:0005622,GO:0070062	GTP binding|intracellular|extracellular exosome
ARL2	2598.91	3602.49	1595.33	0.442885	-1.175	2.42903e-38	1.28666e-37	Down	76.0111	77.6256	80.9722	160.189	158.076	181.384	GeneID:100302310	ADP ribosylation factor like GTPase 2	GO:0003924,GO:0005525,GO:0005634,GO:0005737,GO:0005739,GO:0005758,GO:0005813,GO:0007098,GO:0010811,GO:0016328,GO:0019003,GO:0031116,GO:0034260,GO:0034333,GO:0051457,GO:0070830	GTPase activity|GTP binding|nucleus|cytoplasm|mitochondrion|mitochondrial intermembrane space|centrosome|centrosome cycle|positive regulation of cell-substrate adhesion|lateral plasma membrane|GDP binding|positive regulation of microtubule polymerization|negative regulation of GTPase activity|adherens junction assembly|maintenance of protein location in nucleus|bicellular tight junction assembly
ARL4D	7.56969	14.1441	0.995251	0.0701743	-3.83291	0.000785247	0.00116449	Down	0.0156058	0.0313941	0	0.148059	0.322452	0.163148	GeneID:101109813	ADP ribosylation factor like GTPase 4D	GO:0005525,GO:0005730,GO:0005737,GO:0005886,GO:0006886,GO:0016192	GTP binding|nucleolus|cytoplasm|plasma membrane|intracellular protein transport|vesicle-mediated transport
ARL5A	196.469	71.1427	321.795	4.52793	2.17885	3.47824e-29	1.36004e-28	Up	15.3455	16.7382	16.5543	2.69435	3.6499	3.7881	GeneID:100302313	ADP ribosylation factor like GTPase 5A	GO:0005525,GO:0005737,GO:0005802,GO:0006886,GO:0016192,GO:1903292	GTP binding|cytoplasm|trans-Golgi network|intracellular protein transport|vesicle-mediated transport|protein localization to Golgi membrane
ARL5B	766.922	102.208	1431.64	14.0179	3.8092	6.33543e-109	1.70996e-107	Up	5.4601	5.49588	5.74337	0.492487	0.227514	0.405636	GeneID:101111823	ADP ribosylation factor like GTPase 5B	GO:0005525,GO:0005737,GO:0005802,GO:0006886,GO:0016192,GO:1903292	GTP binding|cytoplasm|trans-Golgi network|intracellular protein transport|vesicle-mediated transport|protein localization to Golgi membrane
ARL6	177.604	71.4075	283.8	3.97689	1.99164	3.28942e-25	1.12237e-24	Up	2.38296	2.12628	2.10654	0.517801	0.498151	0.555228	GeneID:101102858	ADP ribosylation factor like GTPase 6	GO:0005525,GO:0005543,GO:0005737,GO:0005829,GO:0005879,GO:0005930,GO:0006612,GO:0006886,GO:0007420,GO:0008589,GO:0010842,GO:0016055,GO:0016192,GO:0030117,GO:0045444,GO:0051258,GO:0060170,GO:0060271,GO:0061512,GO:0062063,GO:0097499,GO:1903445	GTP binding|phospholipid binding|cytoplasm|cytosol|axonemal microtubule|axoneme|protein targeting to membrane|intracellular protein transport|brain development|regulation of smoothened signaling pathway|retina layer formation|Wnt signaling pathway|vesicle-mediated transport|membrane coat|fat cell differentiation|protein polymerization|ciliary membrane|cilium assembly|protein localization to ciliu…
ARL6IP1	943.914	367.439	1520.39	4.13708	2.04861	8.865e-59	8.79227e-58	Up	66.0741	68.7155	67.9587	19.1441	13.0472	14.1636	GeneID:100302315	ADP ribosylation factor like GTPase 6 interacting protein 1	GO:0002038,GO:0005783,GO:0005789,GO:0006915,GO:0030176,GO:0042802,GO:0043066,GO:0043154,GO:0071787,GO:1990809	positive regulation of L-glutamate import across plasma membrane|endoplasmic reticulum|endoplasmic reticulum membrane|apoptotic process|integral component of endoplasmic reticulum membrane|identical protein binding|negative regulation of apoptotic process|negative regulation of cysteine-type endopeptidase activity involved in apoptotic process|endoplasmic reticulum tubular network formation|endop…
ARL6IP4	1556.64	2211.33	901.946	0.407927	-1.29362	1.2113e-32	5.32859e-32	Down	15.1608	16.5232	15.7758	36.9304	32.0948	40.7038	GeneID:101122815	ADP ribosylation factor like GTPase 6 interacting protein 4	GO:0005730,GO:0006397,GO:0008380,GO:0016607	nucleolus|mRNA processing|RNA splicing|nuclear speck
ARL6IP6	529.691	294.225	765.158	2.60014	1.37859	5.31592e-26	1.85867e-25	Up	4.17413	4.37226	4.81999	1.48029	1.87094	1.50474	GeneID:101116126	ADP ribosylation factor like GTPase 6 interacting protein 6	GO:0016021	integral component of membrane
ARL8A	823.016	1099.25	546.782	0.497433	-1.00743	3.1055e-21	9.26604e-21	Down	26.4249	27.737	25.3702	46.7739	53.3297	50.8659	GeneID:100302316	ADP ribosylation factor like GTPase 8A	GO:0003924,GO:0005525,GO:0005737,GO:0005765,GO:0005774,GO:0005886,GO:0007049,GO:0007059,GO:0016020,GO:0030496,GO:0031902,GO:0035577,GO:0043014,GO:0043312,GO:0048487,GO:0051233,GO:0051301,GO:0070062,GO:0101003	GTPase activity|GTP binding|cytoplasm|lysosomal membrane|vacuolar membrane|plasma membrane|cell cycle|chromosome segregation|membrane|midbody|late endosome membrane|azurophil granule membrane|alpha-tubulin binding|neutrophil degranulation|beta-tubulin binding|spindle midzone|cell division|extracellular exosome|ficolin-1-rich granule membrane
ARMC1	973.488	346.857	1600.12	4.61422	2.20609	6.1814e-89	1.1814e-87	Up	12.7879	14.3661	15.2846	3.06836	2.68447	2.93246	GeneID:101119911	armadillo repeat containing 1	GO:0030001,GO:0046872	metal ion transport|metal ion binding
ARMC12	24.1111	8.88416	39.3381	4.42184	2.14465	6.54995e-05	0.000103747	Up	0.182601	0.0762399	0.152171	0.0294185	0.035594	0.0229207	GeneID:101118823	armadillo repeat containing 12	GO:0005634	nucleus
ARMC4	12.5643	5.26306	19.8655	3.76762	1.91365	0.00546254	0.00764842	Up	0.0907401	0.123215	0.0592058	0.0301312	0.0213057	0.0172477	GeneID:101118121	armadillo repeat containing 4	GO:0003341,GO:0003356,GO:0005930,GO:0007368,GO:0007507,GO:0021591,GO:0036158,GO:0097546	cilium movement|regulation of cilium beat frequency|axoneme|determination of left/right symmetry|heart development|ventricular system development|outer dynein arm assembly|ciliary base
ARMC5	259.118	409.084	109.152	0.266849	-1.9059	6.86416e-29	2.65972e-28	Down	0.346716	0.485208	0.416132	1.50171	1.39457	1.51864	GeneID:101106993	armadillo repeat containing 5	GO:0005654,GO:0005737,GO:0005829,GO:0005925	nucleoplasm|cytoplasm|cytosol|focal adhesion	oas04934	Cushing syndrome
ARMC6	792.382	1219.89	364.878	0.299141	-1.7411	4.76528e-51	3.78838e-50	Down	4.92017	4.67189	4.26029	14.099	13.91	15.694	GeneID:101106680	armadillo repeat containing 6	GO:0002244,GO:0005829	hematopoietic progenitor cell differentiation|cytosol
ARMC8	581.611	184.733	978.49	5.2989	2.40569	3.43918e-76	5.22453e-75	Up	5.24634	5.37667	4.85277	1.01429	0.793468	0.951615	GeneID:101111147	armadillo repeat containing 8	GO:0000151,GO:0005634,GO:0005737,GO:0034657,GO:0043161	ubiquitin ligase complex|nucleus|cytoplasm|GID complex|proteasome-mediated ubiquitin-dependent protein catabolic process
ARMCX1	490.475	306.287	674.663	2.20159	1.13855	2.10603e-16	5.29429e-16	Up	8.9404	7.24675	8.13908	3.74478	3.80759	2.90385	GeneID:101106745	armadillo repeat containing X-linked 1	GO:0005741,GO:0016021	mitochondrial outer membrane|integral component of membrane
ARMCX3	2689.26	578.067	4800.46	8.30684	3.0543	2.3199e-154	1.40817e-152	Up	19.86	19.7191	19.4716	2.54716	1.75973	2.40511	GeneID:101107578	armadillo repeat containing X-linked 3	GO:0005634,GO:0031307,GO:0034613,GO:0045944	nucleus|integral component of mitochondrial outer membrane|cellular protein localization|positive regulation of transcription by RNA polymerase II
ARMCX5	90.3776	33.8516	146.904	4.3493	2.12078	8.66084e-14	1.97661e-13	Up	1.57038	1.71555	1.34669	0.24667	0.322328	0.434893	GeneID:101122765	armadillo repeat containing X-linked 5
ARMT1	149.673	46.3002	253.046	5.46996	2.45153	5.2428e-27	1.89688e-26	Up	2.89523	3.23178	2.90626	0.625295	0.375823	0.559267	GeneID:101102988	acidic residue methyltransferase 1	GO:0006974,GO:0008757,GO:0032259,GO:0051998,GO:2001020	cellular response to DNA damage stimulus|S-adenosylmethionine-dependent methyltransferase activity|methylation|protein carboxyl O-methyltransferase activity|regulation of response to DNA damage stimulus
ARNTL2	67.4168	15.4474	119.386	7.70854	2.94646	9.32938e-19	2.55214e-18	Up	0.887746	0.820924	0.883943	0.135846	0.107583	0.0748448	GeneID:101112046	aryl hydrocarbon receptor nuclear translocator like 2	GO:0000978,GO:0000981,GO:0003700,GO:0005634,GO:0005667,GO:0005730,GO:0005737,GO:0006355,GO:0006357,GO:0007623,GO:0009649,GO:0042753,GO:0045893,GO:0045944,GO:0046983,GO:0070888	RNA polymerase II proximal promoter sequence-specific DNA binding|DNA-binding transcription factor activity, RNA polymerase II-specific|DNA-binding transcription factor activity|nucleus|transcription factor complex|nucleolus|cytoplasm|regulation of transcription, DNA-templated|regulation of transcription by RNA polymerase II|circadian rhythm|entrainment of circadian clock|positive regulation of c…
ARPC1A	9484.03	12706.7	6261.31	0.492768	-1.02102	2.58638e-38	1.36898e-37	Down	104.148	105.597	101.046	195.027	187.762	212.35	GeneID:101113818	actin related protein 2/3 complex subunit 1A	GO:0005634,GO:0005737,GO:0005885,GO:0034314,GO:0035861,GO:0051015	nucleus|cytoplasm|Arp2/3 protein complex|Arp2/3 complex-mediated actin nucleation|site of double-strand break|actin filament binding	oas04144,oas04666,oas04810,oas05100,oas05132	Endocytosis|Fc gamma R-mediated phagocytosis|Regulation of actin cytoskeleton|Bacterial invasion of epithelial cells|Salmonella infection
ARPC4	7591.04	10745.6	4436.51	0.412885	-1.27619	1.27922e-44	8.43843e-44	Down	57.2548	59.869	61.2513	134.04	122.895	150.458	GeneID:105601868	actin related protein 2/3 complex subunit 4	GO:0003779,GO:0005200,GO:0005634,GO:0005829,GO:0005885,GO:0019899,GO:0030041,GO:0034314,GO:0035861,GO:0038096,GO:0042995,GO:0045010,GO:0048013,GO:0061024,GO:0070062	actin binding|structural constituent of cytoskeleton|nucleus|cytosol|Arp2/3 protein complex|enzyme binding|actin filament polymerization|Arp2/3 complex-mediated actin nucleation|site of double-strand break|Fc-gamma receptor signaling pathway involved in phagocytosis|cell projection|actin nucleation|ephrin receptor signaling pathway|membrane organization|extracellular exosome	oas04144,oas04666,oas04810,oas05100,oas05132	Endocytosis|Fc gamma R-mediated phagocytosis|Regulation of actin cytoskeleton|Bacterial invasion of epithelial cells|Salmonella infection
ARPIN	1454.56	1993.47	915.652	0.459393	-1.1222	8.9701e-30	3.59185e-29	Down	15.0283	15.5103	16.796	32.8323	29.7333	34.6543	GeneID:101102340	actin related protein 2/3 complex inhibitor	GO:0030027,GO:0030336,GO:0033058,GO:0051126,GO:2000393	lamellipodium|negative regulation of cell migration|directional locomotion|negative regulation of actin nucleation|negative regulation of lamellipodium morphogenesis
ARPP19	1065.42	536.785	1594.05	2.9697	1.57031	8.47328e-65	9.95329e-64	Up	8.97554	8.71015	9.12104	2.98752	2.77001	2.77141	GeneID:101102906	cAMP regulated phosphoprotein 19	GO:0000086,GO:0000278,GO:0004864,GO:0005737,GO:0019212,GO:0019888,GO:0035308,GO:0051301,GO:0051721	G2/M transition of mitotic cell cycle|mitotic cell cycle|protein phosphatase inhibitor activity|cytoplasm|phosphatase inhibitor activity|protein phosphatase regulator activity|negative regulation of protein dephosphorylation|cell division|protein phosphatase 2A binding
ARRB2	329.935	469.037	190.834	0.406904	-1.29724	2.39287e-20	6.9264e-20	Down	2.95558	2.65225	2.77778	6.26796	6.6403	6.55422	GeneID:101112493	arrestin beta 2	GO:0000822,GO:0002029,GO:0002031,GO:0002092,GO:0005547,GO:0005634,GO:0005737,GO:0005886,GO:0005905,GO:0007165,GO:0015031,GO:0030139,GO:0031623,GO:0035091	inositol hexakisphosphate binding|desensitization of G protein-coupled receptor signaling pathway|G protein-coupled receptor internalization|positive regulation of receptor internalization|phosphatidylinositol-3,4,5-trisphosphate binding|nucleus|cytoplasm|plasma membrane|clathrin-coated pit|signal transduction|protein transport|endocytic vesicle|receptor internalization|phosphatidylinositol bindi…	oas04010,oas04062,oas04144,oas04340,oas04740,oas04926,oas04928,oas05032	MAPK signaling pathway|Chemokine signaling pathway|Endocytosis|Hedgehog signaling pathway|Olfactory transduction|Relaxin signaling pathway|Parathyroid hormone synthesis, secretion and action|Morphine addiction
ARRDC1	979.284	1344.42	614.149	0.456879	-1.13012	2.99055e-26	1.05633e-25	Down	8.30507	7.10307	7.75015	15.169	15.8104	16.8614	GeneID:101101973	arrestin domain containing 1	GO:0005886,GO:0006511,GO:0006858,GO:0015031,GO:0016567,GO:0031410,GO:0031625,GO:0042802,GO:0045746,GO:0070062,GO:0140112,GO:1903561,GO:1990756,GO:1990763	plasma membrane|ubiquitin-dependent protein catabolic process|extracellular transport|protein transport|protein ubiquitination|cytoplasmic vesicle|ubiquitin protein ligase binding|identical protein binding|negative regulation of Notch signaling pathway|extracellular exosome|extracellular vesicle biogenesis|extracellular vesicle|protein binding, bridging involved in substrate recognition for ubiqu…
ARRDC3	989.345	146.679	1832.01	12.4946	3.64323	7.93367e-24	2.59016e-23	Up	12.0818	11.7475	11.6724	1.04866	0.486049	1.14156	GeneID:101107094	arrestin domain containing 3	GO:0001659,GO:0005764,GO:0005768,GO:0005769,GO:0005886,GO:0031651,GO:0031699,GO:0043588,GO:0051443,GO:0060613,GO:0071878,GO:0090327,GO:0120163	temperature homeostasis|lysosome|endosome|early endosome|plasma membrane|negative regulation of heat generation|beta-3 adrenergic receptor binding|skin development|positive regulation of ubiquitin-protein transferase activity|fat pad development|negative regulation of adenylate cyclase-activating adrenergic receptor signaling pathway|negative regulation of locomotion involved in locomotory behavi…
ARRDC4	1129.52	574.609	1684.44	2.92993	1.55086	2.07695e-34	9.69451e-34	Up	10.7591	11.6111	11.3163	4.09683	4.0556	2.73804	GeneID:101112169	arrestin domain containing 4	GO:0005768,GO:0005769,GO:0005886,GO:0015031,GO:0016567,GO:0051443,GO:0140112,GO:1903561,GO:1990756	endosome|early endosome|plasma membrane|protein transport|protein ubiquitination|positive regulation of ubiquitin-protein transferase activity|extracellular vesicle biogenesis|extracellular vesicle|protein binding, bridging involved in substrate recognition for ubiquitination
ARSJ	1495.21	918.119	2072.3	2.25643	1.17404	1.40244e-21	4.23097e-21	Up	30.0865	29.4983	30.5177	12.4975	15.3738	9.93091	GeneID:101113591	arylsulfatase family member J	GO:0004065,GO:0005576,GO:0005788,GO:0046872	arylsulfatase activity|extracellular region|endoplasmic reticulum lumen|metal ion binding
ARSK	171.801	70.9826	272.619	3.84068	1.94136	1.4478e-21	4.36592e-21	Up	3.10814	3.99129	3.05832	0.827537	0.853823	0.817296	GeneID:101109354	arylsulfatase family member K	GO:0005576,GO:0008484,GO:0046872	extracellular region|sulfuric ester hydrolase activity|metal ion binding
ARV1	447.47	146.461	748.48	5.1124	2.354	2.76015e-37	1.41029e-36	Up	13.5315	13.2916	13.1763	3.20948	1.58859	2.59548	GeneID:101110644	ARV1 homolog, fatty acid homeostasis modulator	GO:0005789,GO:0005794,GO:0006665,GO:0008203,GO:0016021,GO:0016125,GO:0032366,GO:0032383,GO:0032541,GO:0090181,GO:0097036	endoplasmic reticulum membrane|Golgi apparatus|sphingolipid metabolic process|cholesterol metabolic process|integral component of membrane|sterol metabolic process|intracellular sterol transport|regulation of intracellular cholesterol transport|cortical endoplasmic reticulum|regulation of cholesterol metabolic process|regulation of plasma membrane sterol distribution
ARVCF	603.637	890.318	316.957	0.35606	-1.48981	3.01384e-27	1.09858e-26	Down	2.5805	2.61095	2.14584	5.93227	6.17373	7.32843	GeneID:105602970	ARVCF delta catenin family member	GO:0005622,GO:0005634,GO:0005737,GO:0005886,GO:0005911,GO:0005913,GO:0007043,GO:0007155,GO:0007275,GO:0016339,GO:0045296,GO:0098609	intracellular|nucleus|cytoplasm|plasma membrane|cell-cell junction|cell-cell adherens junction|cell-cell junction assembly|cell adhesion|multicellular organism development|calcium-dependent cell-cell adhesion via plasma membrane cell adhesion molecules|cadherin binding|cell-cell adhesion
AS3MT	132.176	54.339	210.013	3.87102	1.95271	3.52038e-18	9.42791e-18	Up	1.67298	1.72321	1.7278	0.41207	0.339935	0.49687	GeneID:101115498	arsenite methyltransferase	GO:0005829,GO:0009404,GO:0018872,GO:0030791,GO:0030792,GO:0032259	cytosol|toxin metabolic process|arsonoacetate metabolic process|arsenite methyltransferase activity|methylarsonite methyltransferase activity|methylation
ASAH1	1612.44	1011.32	2213.57	2.18819	1.12974	5.46133e-29	2.12255e-28	Up	33.7743	37.0672	33.513	16.4861	15.9114	12.7332	GeneID:101117904	N-acylsphingosine amidohydrolase 1	GO:0005615,GO:0005764,GO:0006629,GO:0016810,GO:0017040,GO:0102121	extracellular space|lysosome|lipid metabolic process|hydrolase activity, acting on carbon-nitrogen (but not peptide) bonds|N-acylsphingosine amidohydrolase activity|ceramidase activity	oas00600,oas04071,oas04142	Sphingolipid metabolism|Sphingolipid signaling pathway|Lysosome
ASB11	19.8339	2.61351	37.0543	14.0747	3.81504	9.03469e-08	1.63713e-07	Up	0.439573	0.572184	0.441248	0.0122659	0.072855	0.0122872	GeneID:101101864	ankyrin repeat and SOCS box containing 11	GO:0005783,GO:0016567,GO:0035556,GO:0045732	endoplasmic reticulum|protein ubiquitination|intracellular signal transduction|positive regulation of protein catabolic process
ASB16	13.6718	6.17022	21.1733	3.41202	1.77063	0.0192105	0.0256921	Up	0.160258	0.256015	0.189257	0.0715499	0.097391	0	GeneID:101115385	ankyrin repeat and SOCS box containing 16	GO:0005829,GO:0016567,GO:0035556,GO:0043687	cytosol|protein ubiquitination|intracellular signal transduction|post-translational protein modification
ASB3	216.211	53.3724	379.049	7.09423	2.82665	2.11181e-50	1.65013e-49	Up	2.91763	3.09903	2.92875	0.405986	0.445743	0.340141	GeneID:101103551	ankyrin repeat and SOCS box containing 3	GO:0005622,GO:0016567,GO:0035556	intracellular|protein ubiquitination|intracellular signal transduction
ASB6	856.002	1323.39	388.61	0.293686	-1.76765	2.97809e-63	3.36415e-62	Down	4.78838	4.69475	4.77022	14.5466	15.252	16.0084	GeneID:101104650	ankyrin repeat and SOCS box containing 6	GO:0005829,GO:0016567,GO:0035556,GO:0043687	cytosol|protein ubiquitination|intracellular signal transduction|post-translational protein modification
ASB7	538.723	282.006	795.439	2.81897	1.49517	3.61063e-34	1.66771e-33	Up	4.70541	4.54867	4.55671	1.64558	1.67202	1.31657	GeneID:101115908	ankyrin repeat and SOCS box containing 7	GO:0005829,GO:0016567,GO:0035556,GO:0043687	cytosol|protein ubiquitination|intracellular signal transduction|post-translational protein modification
ASCC3	1259.15	283.2	2235.11	7.89891	2.98165	2.69002e-177	2.50296e-175	Up	7.94077	8.14865	8.09636	0.954411	0.871098	1.06456	GeneID:101123305	activating signal cointegrator 1 complex subunit 3	GO:0003676,GO:0005524,GO:0005634,GO:0005829,GO:0006307,GO:0008026,GO:0008283,GO:0016607,GO:0032508,GO:0043140,GO:0099053	nucleic acid binding|ATP binding|nucleus|cytosol|DNA dealkylation involved in DNA repair|ATP-dependent helicase activity|cell proliferation|nuclear speck|DNA duplex unwinding|ATP-dependent 3'-5' DNA helicase activity|activating signal cointegrator 1 complex
ASF1B	1422.23	2166.44	678.022	0.313005	-1.67574	3.10298e-65	3.70341e-64	Down	9.88446	10.1923	9.99551	28.7438	29.2099	32.6848	GeneID:101123293	anti-silencing function 1B histone chaperone	GO:0000790,GO:0001835,GO:0005654,GO:0006335,GO:0006336,GO:0032991,GO:0042393	nuclear chromatin|blastocyst hatching|nucleoplasm|DNA replication-dependent nucleosome assembly|DNA replication-independent nucleosome assembly|protein-containing complex|histone binding
ASH1L	2820.65	853.708	4787.6	5.61	2.488	5.22846e-162	3.60713e-160	Up	10.6803	10.2837	9.85383	1.65927	1.63659	1.88808	GeneID:101119775	ASH1 like histone lysine methyltransferase	GO:0000981,GO:0001501,GO:0002674,GO:0003677,GO:0003682,GO:0005634,GO:0005654,GO:0005694,GO:0005794,GO:0005923,GO:0006323,GO:0006366,GO:0007267,GO:0007338,GO:0009791,GO:0018024,GO:0030317,GO:0032635,GO:0042800,GO:0043124,GO:0043409,GO:0045944,GO:0046697,GO:0046872,GO:0046975,GO:0061038,GO:0097676,GO:1903699,GO:1903709	DNA-binding transcription factor activity, RNA polymerase II-specific|skeletal system development|negative regulation of acute inflammatory response|DNA binding|chromatin binding|nucleus|nucleoplasm|chromosome|Golgi apparatus|bicellular tight junction|DNA packaging|transcription by RNA polymerase II|cell-cell signaling|single fertilization|post-embryonic development|histone-lysine N-methyltransfe…	oas00310	Lysine degradation
ASL	127.744	185.669	69.8196	0.37603	-1.41108	7.08136e-10	1.39429e-09	Down	0.995326	1.32459	0.922264	2.39709	2.96262	2.77963	GeneID:101106412	argininosuccinate lyase	GO:0000050,GO:0004056,GO:0005737,GO:0005829,GO:0042450	urea cycle|argininosuccinate lyase activity|cytoplasm|cytosol|arginine biosynthetic process via ornithine	oas00220,oas00250	Arginine biosynthesis|Alanine, aspartate and glutamate metabolism
ASMTL	2291.24	3373.96	1208.52	0.358223	-1.48107	2.58327e-61	2.79963e-60	Down	15.5385	15.7581	15.6234	40.5832	38.6361	44.3638	GeneID:105611964	acetylserotonin O-methyltransferase like	GO:0005829,GO:0008171,GO:0047429	cytosol|O-methyltransferase activity|nucleoside-triphosphate diphosphatase activity
ASNA1	5757.97	8166.86	3349.08	0.410103	-1.28594	8.08657e-49	6.03209e-48	Down	42.7966	42.6399	47.1378	98.8955	95.5474	110.451	GeneID:101106257	arsA arsenite transporter, ATP-binding, homolog 1 (bacterial)
ASPH	7908.55	1970.17	13846.9	7.02885	2.81329	9.05215e-276	6.40123e-273	Up	39.6982	38.634	40.1099	5.7279	4.81482	5.37336	GeneID:101118195	aspartate beta-hydroxylase	GO:0004597,GO:0005789,GO:0005886,GO:0007389,GO:0008285,GO:0016021,GO:0031647,GO:0032541,GO:0035108,GO:0042264,GO:0046872,GO:0060021,GO:0060325,GO:0097202,GO:1901879	peptide-aspartate beta-dioxygenase activity|endoplasmic reticulum membrane|plasma membrane|pattern specification process|negative regulation of cell proliferation|integral component of membrane|regulation of protein stability|cortical endoplasmic reticulum|limb morphogenesis|peptidyl-aspartic acid hydroxylation|metal ion binding|roof of mouth development|face morphogenesis|activation of cysteine-…
ASPM	1621.61	723.109	2520.11	3.48623	1.80167	3.30704e-82	5.7108e-81	Up	6.16765	5.97053	5.75866	1.52175	1.5944	1.72913	GeneID:443284	abnormal spindle microtubule assembly	GO:0005516,GO:0005634,GO:0005737,GO:0005819,GO:0007051,GO:0051301	calmodulin binding|nucleus|cytoplasm|spindle|spindle organization|cell division
ASPN	819.435	175.668	1463.2	8.33043	3.05839	4.32042e-143	2.18228e-141	Up	14.7402	14.7564	14.6467	1.92502	1.43858	1.64478	GeneID:101108885	asporin	GO:0005509,GO:0005518,GO:0030282,GO:0030512,GO:0031012,GO:0070171	calcium ion binding|collagen binding|bone mineralization|negative regulation of transforming growth factor beta receptor signaling pathway|extracellular matrix|negative regulation of tooth mineralization
ASPSCR1	2282.75	3452.11	1113.39	0.322561	-1.63235	1.27237e-58	1.2584e-57	Down	13.252	13.9714	15.0485	38.1813	39.6892	45.6806	GeneID:101107539	ASPSCR1 tether for SLC2A4, UBX domain containing	GO:0005654,GO:0005829,GO:0005886,GO:0006886,GO:0009898,GO:0012505,GO:0012506,GO:0019898,GO:0030659,GO:0031401,GO:0033116,GO:0042593,GO:0043231,GO:0046324,GO:0048471	nucleoplasm|cytosol|plasma membrane|intracellular protein transport|cytoplasmic side of plasma membrane|endomembrane system|vesicle membrane|extrinsic component of membrane|cytoplasmic vesicle membrane|positive regulation of protein modification process|endoplasmic reticulum-Golgi intermediate compartment membrane|glucose homeostasis|intracellular membrane-bounded organelle|regulation of glucose …	oas05202	Transcriptional misregulation in cancer
ASTE1	195.182	128.651	261.714	2.03529	1.02523	2.67345e-08	4.95033e-08	Up	0.91493	1.02061	0.794119	0.407911	0.400575	0.457653	GeneID:101117135	asteroid homolog 1	GO:0004518,GO:0006281	nuclease activity|DNA repair
ASXL2	2266.07	980.544	3551.59	3.62235	1.85693	2.89374e-106	7.50939e-105	Up	7.94392	7.56456	7.17508	1.89817	2.04126	1.97552	GeneID:101109427	ASXL transcriptional regulator 2	GO:0003677,GO:0003682,GO:0005654,GO:0006351,GO:0009887,GO:0016579,GO:0035360,GO:0035517,GO:0042975,GO:0045600,GO:0045944,GO:0046872	DNA binding|chromatin binding|nucleoplasm|transcription, DNA-templated|animal organ morphogenesis|protein deubiquitination|positive regulation of peroxisome proliferator activated receptor signaling pathway|PR-DUB complex|peroxisome proliferator activated receptor binding|positive regulation of fat cell differentiation|positive regulation of transcription by RNA polymerase II|metal ion binding
ASXL3	274.921	78.4316	471.41	6.00566	2.58632	4.53387e-48	3.29509e-47	Up	1.22879	1.1086	1.01456	0.164637	0.209231	0.153779	GeneID:101117128	ASXL transcriptional regulator 3	GO:0003677,GO:0003682,GO:0006351,GO:0009887,GO:0035517,GO:0042975,GO:0045944,GO:0046872	DNA binding|chromatin binding|transcription, DNA-templated|animal organ morphogenesis|PR-DUB complex|peroxisome proliferator activated receptor binding|positive regulation of transcription by RNA polymerase II|metal ion binding
ATAD1	1225.24	412.512	2037.97	4.94054	2.30467	3.21204e-10	6.41184e-10	Up	18.9732	21.6334	20.8414	5.47849	2.21228	4.06168	GeneID:101119092	ATPase family AAA domain containing 1	GO:0002092,GO:0005524,GO:0005777,GO:0007612,GO:0007613,GO:0016887,GO:0030054,GO:0045211,GO:0051967	positive regulation of receptor internalization|ATP binding|peroxisome|learning|memory|ATPase activity|cell junction|postsynaptic membrane|negative regulation of synaptic transmission, glutamatergic
ATAD2	504.489	97.8814	911.097	9.30896	3.21862	1.96332e-09	3.80009e-09	Up	4.60111	4.32177	4.64821	0.717451	0.175252	0.485353	GeneID:101103903	ATPase family AAA domain containing 2	GO:0003682,GO:0005524,GO:0005634,GO:0005654,GO:0006325,GO:0006357,GO:0016887,GO:0031936,GO:0042393,GO:0045893,GO:0045944,GO:0070062	chromatin binding|ATP binding|nucleus|nucleoplasm|chromatin organization|regulation of transcription by RNA polymerase II|ATPase activity|negative regulation of chromatin silencing|histone binding|positive regulation of transcription, DNA-templated|positive regulation of transcription by RNA polymerase II|extracellular exosome
ATAD2B	281.698	44.3934	519.002	11.7164	3.55046	5.39716e-76	8.18135e-75	Up	1.939	1.78722	1.70395	0.121113	0.142577	0.173787	GeneID:101105229	ATPase family AAA domain containing 2B	GO:0003682,GO:0005524,GO:0005634,GO:0005654,GO:0016887,GO:0031936,GO:0042393,GO:0045944,GO:0070577	chromatin binding|ATP binding|nucleus|nucleoplasm|ATPase activity|negative regulation of chromatin silencing|histone binding|positive regulation of transcription by RNA polymerase II|lysine-acetylated histone binding
ATAD5	124.742	33.4389	216.046	6.48633	2.6974	4.43707e-15	1.06056e-14	Up	1.02894	0.98692	0.828033	0.119451	0.0530081	0.239316	GeneID:101122447	ATPase family AAA domain containing 5	GO:0003677,GO:0005524,GO:0005634,GO:0030890,GO:0031391,GO:0033260,GO:0042100,GO:0042770,GO:0042771,GO:0045190,GO:0045740,GO:0048304,GO:0061860,GO:0090305,GO:0090618,GO:1901990,GO:1902166,GO:1902751	DNA binding|ATP binding|nucleus|positive regulation of B cell proliferation|Elg1 RFC-like complex|nuclear DNA replication|B cell proliferation|signal transduction in response to DNA damage|intrinsic apoptotic signaling pathway in response to DNA damage by p53 class mediator|isotype switching|positive regulation of DNA replication|positive regulation of isotype switching to IgG isotypes|DNA clamp …
ATAT1	731.2	448.22	1014.18	2.26299	1.17823	2.39051e-29	9.42541e-29	Up	7.82159	8.23717	7.50535	3.27063	3.2593	3.30542	GeneID:101106803	alpha tubulin acetyltransferase 1	GO:0004468,GO:0005794,GO:0005829,GO:0005874,GO:0005905,GO:0005925,GO:0007283,GO:0019799,GO:0021542,GO:0030424,GO:0045598,GO:0048666,GO:0050662,GO:0070507,GO:0071929,GO:0072686,GO:0097427,GO:1900227	lysine N-acetyltransferase activity, acting on acetyl phosphate as donor|Golgi apparatus|cytosol|microtubule|clathrin-coated pit|focal adhesion|spermatogenesis|tubulin N-acetyltransferase activity|dentate gyrus development|axon|regulation of fat cell differentiation|neuron development|coenzyme binding|regulation of microtubule cytoskeleton organization|alpha-tubulin acetylation|mitotic spindle|mi…
ATE1	880.765	411.262	1350.27	3.28235	1.71473	1.064e-65	1.2928e-64	Up	6.24584	6.20767	6.55378	1.94588	1.85657	1.67142	GeneID:101110286	arginyltransferase 1	GO:0004057,GO:0005634,GO:0005737,GO:0010498,GO:0016598	arginyltransferase activity|nucleus|cytoplasm|proteasomal protein catabolic process|protein arginylation
ATF1	669.175	216.969	1121.38	5.17157	2.3706	1.0864e-69	1.44136e-68	Up	8.13688	8.51788	8.97711	1.74411	1.24538	1.68985	GeneID:101117917	activating transcription factor 1	GO:0000977,GO:0001228,GO:0005654,GO:0005667,GO:0042802,GO:0046982,GO:1990590	RNA polymerase II regulatory region sequence-specific DNA binding|DNA-binding transcription activator activity, RNA polymerase II-specific|nucleoplasm|transcription factor complex|identical protein binding|protein heterodimerization activity|ATF1-ATF4 transcription factor complex	oas04925,oas05202	Aldosterone synthesis and secretion|Transcriptional misregulation in cancer
ATF2	1131.94	206.95	2056.93	9.94229	3.31358	1.29797e-25	4.48282e-25	Up	12.6929	13.3149	13.9762	1.45894	0.758237	1.57108	GeneID:101108548	activating transcription factor 2			oas04010,oas04022,oas04151,oas04211,oas04261,oas04668,oas04714,oas04728,oas04911,oas04915,oas04918,oas04922,oas04925,oas04926,oas04927,oas04928,oas04934,oas05030,oas05031,oas05034,oas05161,oas05163,oas05166,oas05203	MAPK signaling pathway|cGMP-PKG signaling pathway|PI3K-Akt signaling pathway|Longevity regulating pathway|Adrenergic signaling in cardiomyocytes|TNF signaling pathway|Thermogenesis|Dopaminergic synapse|Insulin secretion|Estrogen signaling pathway|Thyroid hormone synthesis|Glucagon signaling pathway|Aldosterone synthesis and secretion|Relaxin signaling pathway|Cortisol synthesis and secretion|Para…
ATF3	580.197	366.684	793.709	2.16574	1.11486	9.1417e-18	2.40363e-17	Up	4.15206	4.666	4.65657	1.959	1.7133	2.1964	GeneID:101116073	activating transcription factor 3	GO:0000978,GO:0001078,GO:0005634,GO:0005730,GO:0006094,GO:0030968,GO:0034198,GO:0035914,GO:0042803,GO:0046982,GO:0070373,GO:1903984,GO:1990440,GO:1990622	RNA polymerase II proximal promoter sequence-specific DNA binding|proximal promoter DNA-binding transcription repressor activity, RNA polymerase II-specific|nucleus|nucleolus|gluconeogenesis|endoplasmic reticulum unfolded protein response|cellular response to amino acid starvation|skeletal muscle cell differentiation|protein homodimerization activity|protein heterodimerization activity|negative r…
ATF6	2331.98	1134.81	3529.16	3.11023	1.63702	1.26009e-97	2.81986e-96	Up	13.7331	12.8867	13.4696	4.1358	3.97459	4.06467	GeneID:541606	activating transcription factor 6	GO:0000139,GO:0000976,GO:0000977,GO:0000978,GO:0000981,GO:0001077,GO:0001228,GO:0001654,GO:0003700,GO:0003713,GO:0005634,GO:0005635,GO:0005654,GO:0005783,GO:0005789,GO:0005794,GO:0005829,GO:0006357,GO:0006457,GO:0007165,GO:0007601,GO:0016020,GO:0030176,GO:0030968,GO:0031625,GO:0035497,GO:0036500,GO:0042802,GO:0043065,GO:0043565,GO:0045944,GO:0046982,GO:1903893,GO:1990440	Golgi membrane|transcription regulatory region sequence-specific DNA binding|RNA polymerase II regulatory region sequence-specific DNA binding|RNA polymerase II proximal promoter sequence-specific DNA binding|DNA-binding transcription factor activity, RNA polymerase II-specific|proximal promoter DNA-binding transcription activator activity, RNA polymerase II-specific|DNA-binding transcription act…	oas04141,oas05010	Protein processing in endoplasmic reticulum|Alzheimer disease
ATF7IP	1857.35	711.605	3003.09	4.21862	2.07677	2.16921e-95	4.6767e-94	Up	7.76027	7.59622	7.21761	1.70013	1.92046	1.44161	GeneID:101109004	activating transcription factor 7 interacting protein	GO:0000122,GO:0003714,GO:0005634,GO:0005654,GO:0005667,GO:0005829,GO:0006306,GO:0016032,GO:0016604,GO:0016887,GO:0045892,GO:0045893,GO:0045898	negative regulation of transcription by RNA polymerase II|transcription corepressor activity|nucleus|nucleoplasm|transcription factor complex|cytosol|DNA methylation|viral process|nuclear body|ATPase activity|negative regulation of transcription, DNA-templated|positive regulation of transcription, DNA-templated|regulation of RNA polymerase II transcriptional preinitiation complex assembly
ATG12	729.825	456.83	1002.82	2.19589	1.13481	9.24033e-26	3.2078e-25	Up	10.8204	10.5152	10.494	4.67619	4.20651	4.80364	GeneID:101107357	autophagy related 12	GO:0000045,GO:0000422,GO:0006501,GO:0019776,GO:0034045,GO:0034274,GO:0045087	autophagosome assembly|autophagy of mitochondrion|C-terminal protein lipidation|Atg8 ligase activity|phagophore assembly site membrane|Atg12-Atg5-Atg16 complex|innate immune response	oas04068,oas04136,oas04140,oas04621,oas04622	FoxO signaling pathway|Autophagy - other|Autophagy - animal|NOD-like receptor signaling pathway|RIG-I-like receptor signaling pathway
ATG14	209.784	69.2549	350.313	5.04744	2.33555	9.8584e-28	3.64516e-27	Up	2.4655	2.19868	2.0858	0.494352	0.507281	0.265722	GeneID:101119220	autophagy related 14	GO:0000045,GO:0000421,GO:0000423,GO:0001932,GO:0001933,GO:0001934,GO:0005776,GO:0005789,GO:0005829,GO:0005930,GO:0008333,GO:0009267,GO:0010608,GO:0016236,GO:0016240,GO:0034045,GO:0035032,GO:0042149,GO:0043552,GO:0044233,GO:0045335,GO:0051020,GO:0061635,GO:0090207,GO:0097629,GO:0097632,GO:0098780	autophagosome assembly|autophagosome membrane|mitophagy|regulation of protein phosphorylation|negative regulation of protein phosphorylation|positive regulation of protein phosphorylation|autophagosome|endoplasmic reticulum membrane|cytosol|axoneme|endosome to lysosome transport|cellular response to starvation|posttranscriptional regulation of gene expression|macroautophagy|autophagosome membrane…	oas04140,oas05167	Autophagy - animal|Kaposi sarcoma-associated herpesvirus infection
ATG2B	1406.46	727.649	2085.28	2.86494	1.5185	1.46105e-50	1.14734e-49	Up	7.49093	7.09661	7.27658	2.36134	2.75314	2.10261	GeneID:101121043	autophagy related 2B	GO:0000045,GO:0000407,GO:0000422,GO:0005654,GO:0005811,GO:0019898,GO:0034045	autophagosome assembly|phagophore assembly site|autophagy of mitochondrion|nucleoplasm|lipid droplet|extrinsic component of membrane|phagophore assembly site membrane	oas04136,oas04140	Autophagy - other|Autophagy - animal
ATG3	926.035	566.513	1285.56	2.26896	1.18203	1.86223e-36	9.30327e-36	Up	22.7095	23.1449	23.1691	9.90789	9.80818	9.03351	GeneID:101121560	autophagy related 3	GO:0000045,GO:0000153,GO:0000422,GO:0005829,GO:0015031,GO:0016567,GO:0019776,GO:0019777,GO:0019899,GO:0043653,GO:0050765,GO:1902017	autophagosome assembly|cytoplasmic ubiquitin ligase complex|autophagy of mitochondrion|cytosol|protein transport|protein ubiquitination|Atg8 ligase activity|Atg12 transferase activity|enzyme binding|mitochondrial fragmentation involved in apoptotic process|negative regulation of phagocytosis|regulation of cilium assembly	oas04136,oas04140,oas05167	Autophagy - other|Autophagy - animal|Kaposi sarcoma-associated herpesvirus infection
ATG4A	585.91	295.811	876.008	2.96063	1.5659	2.17892e-35	1.05068e-34	Up	7.50174	8.9948	9.03446	3.00728	2.67029	2.4739	GeneID:101113390	autophagy related 4A cysteine peptidase	GO:0000045,GO:0004197,GO:0005737,GO:0015031,GO:0051697	autophagosome assembly|cysteine-type endopeptidase activity|cytoplasm|protein transport|protein delipidation	oas04136,oas04140	Autophagy - other|Autophagy - animal
ATG4B	1576.99	2271.94	882.043	0.388286	-1.36481	3.33284e-46	2.30947e-45	Down	10.5573	10.5114	10.7407	25.4126	24.0403	27.8408	GeneID:101122243	autophagy related 4B cysteine peptidase	GO:0000045,GO:0004197,GO:0005737,GO:0015031,GO:0051697	autophagosome assembly|cysteine-type endopeptidase activity|cytoplasm|protein transport|protein delipidation	oas04136,oas04140	Autophagy - other|Autophagy - animal
ATG4C	376.301	115.856	636.746	5.5024	2.46006	1.44945e-58	1.43053e-57	Up	3.80801	3.95517	3.65633	0.661978	0.555352	0.741802	GeneID:101108002	autophagy related 4C cysteine peptidase	GO:0000045,GO:0004197,GO:0005576,GO:0005737,GO:0005829,GO:0006508,GO:0006612,GO:0006914,GO:0008233	autophagosome assembly|cysteine-type endopeptidase activity|extracellular region|cytoplasm|cytosol|proteolysis|protein targeting to membrane|autophagy|peptidase activity	oas04136,oas04140	Autophagy - other|Autophagy - animal
ATG4D	400.105	591.566	208.644	0.352817	-1.50301	1.3594e-24	4.54515e-24	Down	2.57065	2.47271	2.85602	6.2748	7.02034	7.8156	GeneID:101118272	autophagy related 4D cysteine peptidase	GO:0005759,GO:0006914,GO:0006915,GO:0008234,GO:0015031	mitochondrial matrix|autophagy|apoptotic process|cysteine-type peptidase activity|protein transport	oas04136,oas04140	Autophagy - other|Autophagy - animal
ATG5	564.932	286.535	843.329	2.94217	1.55688	6.13294e-40	3.43654e-39	Up	3.44466	3.32379	3.47789	1.21984	1.08342	0.989746	GeneID:100913169	autophagy related 5	GO:0000045,GO:0000422,GO:0002376,GO:0005930,GO:0006501,GO:0006914,GO:0006915,GO:0006995,GO:0034045,GO:0034274,GO:1902017	autophagosome assembly|autophagy of mitochondrion|immune system process|axoneme|C-terminal protein lipidation|autophagy|apoptotic process|cellular response to nitrogen starvation|phagophore assembly site membrane|Atg12-Atg5-Atg16 complex|regulation of cilium assembly	oas04136,oas04137,oas04140,oas04211,oas04213,oas04216,oas04621,oas04622	Autophagy - other|Mitophagy - animal|Autophagy - animal|Longevity regulating pathway|Longevity regulating pathway - multiple species|Ferroptosis|NOD-like receptor signaling pathway|RIG-I-like receptor signaling pathway
ATG7	878.376	1223.53	533.219	0.435822	-1.19819	2.35639e-31	9.97497e-31	Down	3.02971	2.79347	2.68222	5.92849	6.27391	6.22871	GeneID:101121977	autophagy related 7	GO:0000045,GO:0000407,GO:0000422,GO:0004839,GO:0005576,GO:0005737,GO:0005829,GO:0005930,GO:0006464,GO:0006497,GO:0006501,GO:0006914,GO:0006995,GO:0007568,GO:0008134,GO:0009267,GO:0009749,GO:0010508,GO:0015031,GO:0016236,GO:0019778,GO:0019779,GO:0030424,GO:0031401,GO:0034727,GO:0034774,GO:0039521,GO:0042803,GO:0043065,GO:0043312,GO:0044805,GO:0045732,GO:0051607,GO:0061025,GO:0071315,GO:0071455,GO:…	autophagosome assembly|phagophore assembly site|autophagy of mitochondrion|ubiquitin activating enzyme activity|extracellular region|cytoplasm|cytosol|axoneme|cellular protein modification process|protein lipidation|C-terminal protein lipidation|autophagy|cellular response to nitrogen starvation|aging|transcription factor binding|cellular response to starvation|response to glucose|positive regula…	oas04136,oas04140,oas04216	Autophagy - other|Autophagy - animal|Ferroptosis
ATIC	2645.05	1548.54	3741.57	2.41576	1.27248	2.87851e-39	1.57428e-38	Up	35.7249	38.3201	37.6892	16.8582	14.4418	12.4714	GeneID:101105137	5-aminoimidazole-4-carboxamide ribonucleotide formyltransferase/IMP cyclohydrolase	GO:0003937,GO:0004643,GO:0005829,GO:0005886,GO:0006189,GO:0042803	IMP cyclohydrolase activity|phosphoribosylaminoimidazolecarboxamide formyltransferase activity|cytosol|plasma membrane|'de novo' IMP biosynthetic process|protein homodimerization activity	oas00230,oas00670,oas01523	Purine metabolism|One carbon pool by folate|Antifolate resistance
ATL1	49.5546	26.6794	72.4297	2.72227	1.44481	0.000610264	0.000911112	Up	1.00609	0.670857	0.80567	0.289574	0.116787	0.45123	GeneID:101104070	atlastin GTPase 1	GO:0000137,GO:0000139,GO:0003924,GO:0005525,GO:0005783,GO:0005789,GO:0005794,GO:0007029,GO:0007409,GO:0016021,GO:0030424,GO:0042802,GO:0051260,GO:0071782,GO:0098826,GO:1990809	Golgi cis cisterna|Golgi membrane|GTPase activity|GTP binding|endoplasmic reticulum|endoplasmic reticulum membrane|Golgi apparatus|endoplasmic reticulum organization|axonogenesis|integral component of membrane|axon|identical protein binding|protein homooligomerization|endoplasmic reticulum tubular network|endoplasmic reticulum tubular network membrane|endoplasmic reticulum tubular network membran…
ATL2	617.83	242.363	993.297	4.09872	2.03517	1.93949e-63	2.20857e-62	Up	6.86545	6.54942	6.3387	1.69216	1.3672	1.49567	GeneID:101120404	atlastin GTPase 2	GO:0003924,GO:0005525,GO:0005783,GO:0007029,GO:0007030,GO:0016021,GO:0042802,GO:0051260,GO:0098826,GO:1990809	GTPase activity|GTP binding|endoplasmic reticulum|endoplasmic reticulum organization|Golgi organization|integral component of membrane|identical protein binding|protein homooligomerization|endoplasmic reticulum tubular network membrane|endoplasmic reticulum tubular network membrane organization
ATL3	3282.24	1152.99	5411.49	4.69472	2.23104	4.28507e-136	1.8821e-134	Up	22.0116	22.5548	22.4191	4.54138	4.03959	4.88279	GeneID:101120873	atlastin GTPase 3	GO:0003924,GO:0005525,GO:0005783,GO:0007029,GO:0007030,GO:0016020,GO:0016021,GO:0042802,GO:0051260,GO:0071782,GO:0098826,GO:1903373	GTPase activity|GTP binding|endoplasmic reticulum|endoplasmic reticulum organization|Golgi organization|membrane|integral component of membrane|identical protein binding|protein homooligomerization|endoplasmic reticulum tubular network|endoplasmic reticulum tubular network membrane|positive regulation of endoplasmic reticulum tubular network organization
ATM	611.716	53.294	1170.14	21.9629	4.457	4.01112e-21	1.19355e-20	Up	3.09729	2.77635	2.48916	0.174433	0.0509179	0.134412	GeneID:101105847	ATM serine/threonine kinase			oas01524,oas03440,oas04064,oas04068,oas04110,oas04115,oas04210,oas04218,oas05165,oas05166,oas05170,oas05202,oas05206	Platinum drug resistance|Homologous recombination|NF-kappa B signaling pathway|FoxO signaling pathway|Cell cycle|p53 signaling pathway|Apoptosis|Cellular senescence|Human papillomavirus infection|Human T-cell leukemia virus 1 infection|Human immunodeficiency virus 1 infection|Transcriptional misregulation in cancer|MicroRNAs in cancer
ATOH8	69.819	93.6353	46.0028	0.49139	-1.02506	0.00113725	0.00167108	Down	0.443277	0.805039	0.469686	1.17989	0.902035	1.21705	GeneID:101102971	atonal bHLH transcription factor 8	GO:0001704,GO:0001937,GO:0003700,GO:0005634,GO:0005654,GO:0005737,GO:0007399,GO:0008134,GO:0010595,GO:0010628,GO:0010629,GO:0016607,GO:0030154,GO:0033613,GO:0035148,GO:0045603,GO:0045892,GO:0045893,GO:0046983,GO:0051450,GO:0060395,GO:0070888	formation of primary germ layer|negative regulation of endothelial cell proliferation|DNA-binding transcription factor activity|nucleus|nucleoplasm|cytoplasm|nervous system development|transcription factor binding|positive regulation of endothelial cell migration|positive regulation of gene expression|negative regulation of gene expression|nuclear speck|cell differentiation|activating transcripti…
ATP11B	1363.75	240.01	2487.49	10.3686	3.37415	1.5498e-146	8.30258e-145	Up	8.36748	7.85099	8.01568	0.880712	0.55207	0.775395	GeneID:101110296	ATPase phospholipid transporting 11B (putative)	GO:0000287,GO:0004012,GO:0005524,GO:0005637,GO:0005769,GO:0005783,GO:0005802,GO:0005886,GO:0006811,GO:0015075,GO:0015917,GO:0016020,GO:0016021,GO:0034220,GO:0035577,GO:0043312,GO:0045332,GO:0055037,GO:0055038	magnesium ion binding|phospholipid-translocating ATPase activity|ATP binding|nuclear inner membrane|early endosome|endoplasmic reticulum|trans-Golgi network|plasma membrane|ion transport|ion transmembrane transporter activity|aminophospholipid transport|membrane|integral component of membrane|ion transmembrane transport|azurophil granule membrane|neutrophil degranulation|phospholipid translocatio…
ATP11C	544.088	102.213	985.962	9.64768	3.27018	1.19273e-15	2.9099e-15	Up	4.69314	4.15146	4.27075	0.60755	0.21421	0.462706	GeneID:101122839	ATPase phospholipid transporting 11C	GO:0000287,GO:0002329,GO:0004012,GO:0005524,GO:0005765,GO:0005783,GO:0005789,GO:0005802,GO:0005886,GO:0016021,GO:0034220,GO:0045332,GO:0045579,GO:0055037	magnesium ion binding|pre-B cell differentiation|phospholipid-translocating ATPase activity|ATP binding|lysosomal membrane|endoplasmic reticulum|endoplasmic reticulum membrane|trans-Golgi network|plasma membrane|integral component of membrane|ion transmembrane transport|phospholipid translocation|positive regulation of B cell differentiation|recycling endosome
ATP12A	2.65956	4.9872	0.331913	0.07136	-3.80874	0.0273973	0.0361017	Down	0	0.00666216	0	0.0251358	0.0248829	0.044064	GeneID:101120253	ATPase H+/K+ transporting non-gastric alpha2 subunit	GO:0005391,GO:0005524,GO:0005886,GO:0005889,GO:0006883,GO:0006885,GO:0008900,GO:0010107,GO:0015991,GO:0016323,GO:0030007,GO:0036376,GO:0046872	sodium:potassium-exchanging ATPase activity|ATP binding|plasma membrane|potassium:proton exchanging ATPase complex|cellular sodium ion homeostasis|regulation of pH|potassium:proton exchanging ATPase activity|potassium ion import|ATP hydrolysis coupled proton transport|basolateral plasma membrane|cellular potassium ion homeostasis|sodium ion export across plasma membrane|metal ion binding	oas00190	Oxidative phosphorylation
ATP13A2	736.764	985.699	487.828	0.494981	-1.01456	2.10263e-18	5.66754e-18	Down	3.56098	3.05091	3.27276	5.79345	6.42537	6.62895	GeneID:101108996	ATPase cation transporting 13A2	GO:0005524,GO:0005764,GO:0005765,GO:0005770,GO:0005771,GO:0005776,GO:0006874,GO:0006879,GO:0006882,GO:0008270,GO:0010821,GO:0012506,GO:0016021,GO:0016241,GO:0016243,GO:0016887,GO:0019829,GO:0030003,GO:0030133,GO:0030145,GO:0031982,GO:0032585,GO:0033157,GO:0034220,GO:0034599,GO:0043005,GO:0043025,GO:0043202,GO:0046777,GO:0050714,GO:0052548,GO:0055069,GO:0070300,GO:0071287,GO:0071294,GO:0080025,GO:…	ATP binding|lysosome|lysosomal membrane|late endosome|multivesicular body|autophagosome|cellular calcium ion homeostasis|cellular iron ion homeostasis|cellular zinc ion homeostasis|zinc ion binding|regulation of mitochondrion organization|vesicle membrane|integral component of membrane|regulation of macroautophagy|regulation of autophagosome size|ATPase activity|cation-transporting ATPase activit…
ATP13A3	4534.31	1116.76	7951.86	7.12293	2.83247	5.56146e-156	3.43475e-154	Up	23.3592	23.3495	23.4395	3.01029	2.66042	3.61254	GeneID:101106047	ATPase 13A3	GO:0005524,GO:0005623,GO:0006812,GO:0006874,GO:0016020,GO:0016021,GO:0016887,GO:0046872	ATP binding|cell|cation transport|cellular calcium ion homeostasis|membrane|integral component of membrane|ATPase activity|metal ion binding
ATP1B2	9.42671	14.2273	4.62611	0.325431	-1.61958	0.0357264	0.0465304	Down	0.0408385	0.0246464	0.049193	0.0697416	0.138079	0.1242	GeneID:101103490	ATPase Na+/K+ transporting subunit beta 2	GO:0005890,GO:0006813,GO:0006814,GO:0007155	sodium:potassium-exchanging ATPase complex|potassium ion transport|sodium ion transport|cell adhesion	oas04022,oas04024,oas04260,oas04261,oas04911,oas04918,oas04919,oas04925,oas04960,oas04961,oas04964,oas04970,oas04971,oas04972,oas04973,oas04974,oas04976,oas04978	cGMP-PKG signaling pathway|cAMP signaling pathway|Cardiac muscle contraction|Adrenergic signaling in cardiomyocytes|Insulin secretion|Thyroid hormone synthesis|Thyroid hormone signaling pathway|Aldosterone synthesis and secretion|Aldosterone-regulated sodium reabsorption|Endocrine and other factor-regulated calcium reabsorption|Proximal tubule bicarbonate reclamation|Salivary secretion|Gastric ac…
ATP2B1	1204.01	272.338	2135.68	7.84422	2.97163	5.03434e-24	1.65352e-23	Up	7.75318	7.8281	8.24792	1.05731	0.60451	1.19896	GeneID:101111268	ATPase plasma membrane Ca2+ transporting 1	GO:0003407,GO:0005388,GO:0005516,GO:0005524,GO:0005634,GO:0005886,GO:0005887,GO:0006874,GO:0007420,GO:0007568,GO:0009409,GO:0009898,GO:0015085,GO:0016020,GO:0016323,GO:0016324,GO:0030165,GO:0032591,GO:0032809,GO:0034220,GO:0045121,GO:0046872,GO:0051480,GO:0070062,GO:0071305,GO:0071386,GO:0098978,GO:0098982,GO:0099059,GO:1903779,GO:1905056,GO:1990034	neural retina development|calcium-transporting ATPase activity|calmodulin binding|ATP binding|nucleus|plasma membrane|integral component of plasma membrane|cellular calcium ion homeostasis|brain development|aging|response to cold|cytoplasmic side of plasma membrane|calcium ion transmembrane transporter activity|membrane|basolateral plasma membrane|apical plasma membrane|PDZ domain binding|dendrit…	oas04020,oas04022,oas04024,oas04261,oas04925,oas04970,oas04972	Calcium signaling pathway|cGMP-PKG signaling pathway|cAMP signaling pathway|Adrenergic signaling in cardiomyocytes|Aldosterone synthesis and secretion|Salivary secretion|Pancreatic secretion
ATP2C1	1945.54	453.53	3437.55	7.57943	2.92209	7.57629e-227	1.87985e-224	Up	21.408	21.2424	22.8579	2.99177	2.54868	2.62682	GeneID:101121651	ATPase secretory pathway Ca2+ transporting 1	GO:0000139,GO:0005388,GO:0005509,GO:0005524,GO:0005794,GO:0005802,GO:0006816,GO:0006828,GO:0006874,GO:0008544,GO:0008553,GO:0015410,GO:0016021,GO:0016339,GO:0030026,GO:0030145,GO:0031532,GO:0032468,GO:0032472,GO:0043123,GO:0070588	Golgi membrane|calcium-transporting ATPase activity|calcium ion binding|ATP binding|Golgi apparatus|trans-Golgi network|calcium ion transport|manganese ion transport|cellular calcium ion homeostasis|epidermis development|proton-exporting ATPase activity, phosphorylative mechanism|manganese-transporting ATPase activity|integral component of membrane|calcium-dependent cell-cell adhesion via plasma …
ATP4B	17.1676	26.0531	8.28214	0.317701	-1.65426	0.0199493	0.0266475	Down	0.0216622	0.413987	0.108724	0.534349	0.590006	0.494101	GeneID:114116709	ATPase H+/K+ transporting subunit beta	GO:0001671,GO:0005890,GO:0006883,GO:0007155,GO:0010107,GO:0010248,GO:0030007,GO:0036376	ATPase activator activity|sodium:potassium-exchanging ATPase complex|cellular sodium ion homeostasis|cell adhesion|potassium ion import|establishment or maintenance of transmembrane electrochemical gradient|cellular potassium ion homeostasis|sodium ion export across plasma membrane	oas00190,oas04966,oas04971	Oxidative phosphorylation|Collecting duct acid secretion|Gastric acid secretion
ATP5F1B	31919.9	42835.9	21003.8	0.490337	-1.02816	1.13912e-44	7.53885e-44	Down	307.194	318.941	330.519	605.83	587.338	647.79	GeneID:101106318	ATP synthase F1 subunit beta	GO:0001525,GO:0005524,GO:0005753,GO:0005886,GO:0006629,GO:0006933,GO:0009986,GO:0015986,GO:0016887,GO:0042288,GO:0042645,GO:0043209,GO:0043532,GO:0043536,GO:0045261,GO:0046933,GO:0046961,GO:0051453	angiogenesis|ATP binding|mitochondrial proton-transporting ATP synthase complex|plasma membrane|lipid metabolic process|negative regulation of cell adhesion involved in substrate-bound cell migration|cell surface|ATP synthesis coupled proton transport|ATPase activity|MHC class I protein binding|mitochondrial nucleoid|myelin sheath|angiostatin binding|positive regulation of blood vessel endothelia…	oas00190,oas04714,oas05010,oas05012,oas05016	Oxidative phosphorylation|Thermogenesis|Alzheimer disease|Parkinson disease|Huntington disease
ATP5F1D	6549.91	9737.48	3362.33	0.345315	-1.53402	6.18479e-56	5.63242e-55	Down	74.3643	73.9158	81.3825	194.506	196.185	236.161	GeneID:101117502	ATP synthase F1 subunit delta	GO:0000275,GO:0005740,GO:0005753,GO:0015078,GO:0015986,GO:0045259,GO:0046933,GO:1902600	mitochondrial proton-transporting ATP synthase complex, catalytic core F(1)|mitochondrial envelope|mitochondrial proton-transporting ATP synthase complex|proton transmembrane transporter activity|ATP synthesis coupled proton transport|proton-transporting ATP synthase complex|proton-transporting ATP synthase activity, rotational mechanism|proton transmembrane transport	oas00190,oas04714,oas05010,oas05012,oas05016	Oxidative phosphorylation|Thermogenesis|Alzheimer disease|Parkinson disease|Huntington disease
ATP5MC1	17.5309	27.7777	7.28408	0.262181	-1.93136	0.00115684	0.00169915	Down	0.440455	0.221515	0.147378	1.00987	0.861819	1.04651	GeneID:443410;GeneID:114108664	ATP synthase membrane subunit c locus 1	GO:0005753,GO:0008289,GO:0015078,GO:0015986,GO:0015991,GO:0016021,GO:0045263	mitochondrial proton-transporting ATP synthase complex|lipid binding|proton transmembrane transporter activity|ATP synthesis coupled proton transport|ATP hydrolysis coupled proton transport|integral component of membrane|proton-transporting ATP synthase complex, coupling factor F(o)	oas00190,oas04714,oas05010,oas05012,oas05016	Oxidative phosphorylation|Thermogenesis|Alzheimer disease|Parkinson disease|Huntington disease
ATP5MC2	11967.2	16440.4	7493.86	0.45583	-1.13343	1.18469e-44	7.8331e-44	Down	283.516	296.022	312.115	610.117	576.167	659.072	GeneID:443542	ATP synthase membrane subunit c locus 2	GO:0008289,GO:0015078,GO:0015986,GO:0015991,GO:0016021,GO:0031966,GO:0045263	lipid binding|proton transmembrane transporter activity|ATP synthesis coupled proton transport|ATP hydrolysis coupled proton transport|integral component of membrane|mitochondrial membrane|proton-transporting ATP synthase complex, coupling factor F(o)	oas00190,oas04714,oas05010,oas05012,oas05016	Oxidative phosphorylation|Thermogenesis|Alzheimer disease|Parkinson disease|Huntington disease
ATP5ME	2865.96	4033.5	1698.41	0.4211	-1.24776	8.52257e-49	6.35062e-48	Down	128.815	127.779	125.214	294.14	262.64	299.158	GeneID:101111455	ATP synthase membrane subunit e	GO:0000276,GO:0005753,GO:0015078,GO:0015986	mitochondrial proton-transporting ATP synthase complex, coupling factor F(o)|mitochondrial proton-transporting ATP synthase complex|proton transmembrane transporter activity|ATP synthesis coupled proton transport	oas00190,oas04714	Oxidative phosphorylation|Thermogenesis
ATP6AP1L	4038.27	2642.66	5433.89	2.05602	1.03985	1.23831e-26	4.42593e-26	Up	98.5343	98.5426	102.985	54.2804	44.2627	39.5829	GeneID:101123629	ATPase H+ transporting accessory protein 1 like	GO:0015991,GO:0016021,GO:0033180,GO:0046933,GO:0046961	ATP hydrolysis coupled proton transport|integral component of membrane|proton-transporting V-type ATPase, V1 domain|proton-transporting ATP synthase activity, rotational mechanism|proton-transporting ATPase activity, rotational mechanism
ATP6AP2	3450.94	2128.76	4773.11	2.24228	1.16497	2.30704e-59	2.33728e-58	Up	58.324	60.8108	60.4637	26.3492	24.4181	24.8977	GeneID:101103453	ATPase H+ transporting accessory protein 2	GO:0016021,GO:0038023	integral component of membrane|signaling receptor activity	oas04614	Renin-angiotensin system
ATP6V0A2	789.757	365.803	1213.71	3.3173	1.73001	2.27589e-50	1.7754e-49	Up	5.88845	5.57586	5.9346	1.50651	1.91301	1.53607	GeneID:101121550	ATPase H+ transporting V0 subunit a2	GO:0000220,GO:0001669,GO:0005886,GO:0006879,GO:0007035,GO:0010008,GO:0015991,GO:0016021,GO:0016471,GO:0036295,GO:0046961,GO:0051117	vacuolar proton-transporting V-type ATPase, V0 domain|acrosomal vesicle|plasma membrane|cellular iron ion homeostasis|vacuolar acidification|endosome membrane|ATP hydrolysis coupled proton transport|integral component of membrane|vacuolar proton-transporting V-type ATPase complex|cellular response to increased oxygen levels|proton-transporting ATPase activity, rotational mechanism|ATPase binding	oas00190,oas04142,oas04145,oas04721,oas04966,oas05152,oas05165,oas05323	Oxidative phosphorylation|Lysosome|Phagosome|Synaptic vesicle cycle|Collecting duct acid secretion|Tuberculosis|Human papillomavirus infection|Rheumatoid arthritis
ATP6V0C	2851.05	3860.03	1842.07	0.477247	-1.06719	2.05396e-34	9.59354e-34	Down	98.7071	105.356	117.261	202.894	216.186	216.359	GeneID:443003	ATPase H+ transporting V0 subunit c	GO:0005774,GO:0015078,GO:0015991,GO:0016021,GO:0033179	vacuolar membrane|proton transmembrane transporter activity|ATP hydrolysis coupled proton transport|integral component of membrane|proton-transporting V-type ATPase, V0 domain	oas00190,oas04142,oas04145,oas04721,oas04966,oas05152,oas05165,oas05323	Oxidative phosphorylation|Lysosome|Phagosome|Synaptic vesicle cycle|Collecting duct acid secretion|Tuberculosis|Human papillomavirus infection|Rheumatoid arthritis
ATP6V0E2	1342.61	1973.75	711.461	0.360502	-1.47192	1.57346e-48	1.1651e-47	Down	3.70364	4.16839	3.86516	10.0564	9.66405	10.9991	GeneID:101122020	ATPase H+ transporting V0 subunit e2	GO:0015078,GO:0015991,GO:0016021,GO:0016787,GO:0033179,GO:0055085	proton transmembrane transporter activity|ATP hydrolysis coupled proton transport|integral component of membrane|hydrolase activity|proton-transporting V-type ATPase, V0 domain|transmembrane transport	oas00190,oas04145,oas04721,oas04966,oas05165,oas05323	Oxidative phosphorylation|Phagosome|Synaptic vesicle cycle|Collecting duct acid secretion|Human papillomavirus infection|Rheumatoid arthritis
ATP6V1A	3009.11	1213.57	4804.65	3.95835	1.9849	1.08657e-118	3.52462e-117	Up	29.4394	30.4615	29.9912	8.05789	7.02676	6.39536	GeneID:101102025	ATPase H+ transporting V1 subunit A	GO:0005524,GO:0005774,GO:0005829,GO:0005886,GO:0005902,GO:0006879,GO:0015991,GO:0016324,GO:0033180,GO:0036295,GO:0043209,GO:0046034,GO:0046961	ATP binding|vacuolar membrane|cytosol|plasma membrane|microvillus|cellular iron ion homeostasis|ATP hydrolysis coupled proton transport|apical plasma membrane|proton-transporting V-type ATPase, V1 domain|cellular response to increased oxygen levels|myelin sheath|ATP metabolic process|proton-transporting ATPase activity, rotational mechanism	oas00190,oas04145,oas04150,oas04721,oas04966,oas05165,oas05323	Oxidative phosphorylation|Phagosome|mTOR signaling pathway|Synaptic vesicle cycle|Collecting duct acid secretion|Human papillomavirus infection|Rheumatoid arthritis
ATP6V1C1	739.645	308.495	1170.8	3.79452	1.92392	1.05422e-74	1.56287e-73	Up	8.1266	8.00252	8.10277	2.14276	1.99944	1.89357	GeneID:101122445	ATPase H+ transporting V1 subunit C1	GO:0000221,GO:0005886,GO:0008553,GO:0015991,GO:0046961	vacuolar proton-transporting V-type ATPase, V1 domain|plasma membrane|proton-exporting ATPase activity, phosphorylative mechanism|ATP hydrolysis coupled proton transport|proton-transporting ATPase activity, rotational mechanism	oas00190,oas04145,oas04150,oas04721,oas04966,oas05165,oas05323	Oxidative phosphorylation|Phagosome|mTOR signaling pathway|Synaptic vesicle cycle|Collecting duct acid secretion|Human papillomavirus infection|Rheumatoid arthritis
ATP6V1D	972.481	382.071	1562.89	4.09013	2.03215	4.61124e-66	5.63672e-65	Up	28.4322	29.2356	30.6727	8.14904	5.89716	6.37472	GeneID:101121176	ATPase H+ transporting V1 subunit D	GO:0005765,GO:0005829,GO:0005886,GO:0008286,GO:0016020,GO:0016241,GO:0033176,GO:0033572,GO:0034220,GO:0035579,GO:0043312,GO:0046961,GO:0060271,GO:0061512,GO:0070062	lysosomal membrane|cytosol|plasma membrane|insulin receptor signaling pathway|membrane|regulation of macroautophagy|proton-transporting V-type ATPase complex|transferrin transport|ion transmembrane transport|specific granule membrane|neutrophil degranulation|proton-transporting ATPase activity, rotational mechanism|cilium assembly|protein localization to cilium|extracellular exosome	oas00190,oas04145,oas04150,oas04721,oas04966,oas05165,oas05323	Oxidative phosphorylation|Phagosome|mTOR signaling pathway|Synaptic vesicle cycle|Collecting duct acid secretion|Human papillomavirus infection|Rheumatoid arthritis
ATP6V1F	4363.3	6233.81	2492.8	0.399911	-1.32225	7.30495e-44	4.69182e-43	Down	89.9957	89.0629	95.1431	210.636	195.405	240.465	GeneID:101112724	ATPase H+ transporting V1 subunit F	GO:0015991,GO:0016020,GO:0033180,GO:0042625,GO:0046961	ATP hydrolysis coupled proton transport|membrane|proton-transporting V-type ATPase, V1 domain|ATPase coupled ion transmembrane transporter activity|proton-transporting ATPase activity, rotational mechanism	oas00190,oas04145,oas04150,oas04721,oas04966,oas05165,oas05323	Oxidative phosphorylation|Phagosome|mTOR signaling pathway|Synaptic vesicle cycle|Collecting duct acid secretion|Human papillomavirus infection|Rheumatoid arthritis
ATP7A	650.434	87.5974	1213.27	13.8824	3.79518	3.5169e-113	1.03194e-111	Up	7.16641	6.1337	6.15846	0.4516	0.307971	0.562966	GeneID:101116379	ATPase copper transporting alpha			oas01524	Platinum drug resistance
ATP8B1	901.848	463.034	1340.66	2.89375	1.53294	1.83951e-34	8.61751e-34	Up	6.46297	7.13894	6.39872	2.49188	2.33746	1.71555	GeneID:101115500	ATPase phospholipid transporting 8B1	GO:0000287,GO:0004012,GO:0005524,GO:0005783,GO:0005794,GO:0005886,GO:0005887,GO:0006855,GO:0007030,GO:0007605,GO:0015721,GO:0016324,GO:0032420,GO:0032534,GO:0034220,GO:0045332,GO:0045892	magnesium ion binding|phospholipid-translocating ATPase activity|ATP binding|endoplasmic reticulum|Golgi apparatus|plasma membrane|integral component of plasma membrane|drug transmembrane transport|Golgi organization|sensory perception of sound|bile acid and bile salt transport|apical plasma membrane|stereocilium|regulation of microvillus assembly|ion transmembrane transport|phospholipid transloc…
ATP8B4	1113.06	154.941	2071.19	13.3798	3.74198	8.24282e-125	3.10048e-123	Up	9.24733	8.4719	9.26532	0.770164	0.411461	0.722516	GeneID:101108837	ATPase phospholipid transporting 8B4 (putative)	GO:0000287,GO:0004012,GO:0005524,GO:0005794,GO:0005886,GO:0007030,GO:0016021,GO:0035579,GO:0043312,GO:0045332,GO:0070821	magnesium ion binding|phospholipid-translocating ATPase activity|ATP binding|Golgi apparatus|plasma membrane|Golgi organization|integral component of membrane|specific granule membrane|neutrophil degranulation|phospholipid translocation|tertiary granule membrane
ATPAF2	545.382	743.923	346.842	0.466377	-1.10043	1.51939e-17	3.96837e-17	Down	6.82404	6.88466	7.98827	14.2786	13.5927	16.008	GeneID:101111895	ATP synthase mitochondrial F1 complex assembly factor 2	GO:0005739,GO:0005829,GO:0016607,GO:0043461	mitochondrion|cytosol|nuclear speck|proton-transporting ATP synthase complex assembly
ATPSCKMT	434.527	245.546	623.509	2.5391	1.34432	1.55781e-21	4.69567e-21	Up	6.75717	5.62383	5.68921	2.53894	2.04662	2.14368	GeneID:101122627	ATP synthase c subunit lysine N-methyltransferase	GO:0016021,GO:0016279,GO:0018022,GO:0030061,GO:1904058	integral component of membrane|protein-lysine N-methyltransferase activity|peptidyl-lysine methylation|mitochondrial crista|positive regulation of sensory perception of pain
ATR	319.399	44.2095	594.589	13.4481	3.74933	1.15579e-17	3.02991e-17	Up	2.03398	2.11374	1.645	0.213398	0.0694108	0.125207	GeneID:101106566	ATR serine/threonine kinase			oas03460,oas04110,oas04115,oas04218,oas05165,oas05166,oas05170	Fanconi anemia pathway|Cell cycle|p53 signaling pathway|Cellular senescence|Human papillomavirus infection|Human T-cell leukemia virus 1 infection|Human immunodeficiency virus 1 infection
ATRIP	538.7	744.719	332.681	0.446794	-1.16232	2.19599e-23	7.06022e-23	Down	3.48878	3.41433	3.67034	7.13678	7.55695	7.64701	GeneID:101110882	ATR interacting protein	GO:0000077,GO:0005634,GO:0005654,GO:0006260,GO:0036297,GO:0070530	DNA damage checkpoint|nucleus|nucleoplasm|DNA replication|interstrand cross-link repair|K63-linked polyubiquitin modification-dependent protein binding	oas03460	Fanconi anemia pathway
ATRNL1	320.533	59.5634	581.503	9.77567	3.2892	2.19133e-75	3.29002e-74	Up	2.08849	1.76985	1.77268	0.154516	0.185952	0.203344	GeneID:101119865	attractin like 1	GO:0007186,GO:0016021,GO:0030246	G protein-coupled receptor signaling pathway|integral component of membrane|carbohydrate binding
ATRX	1473.87	155.069	2792.66	18.014	4.17105	2.92295e-21	8.73058e-21	Up	6.82973	6.55111	6.34152	0.419753	0.159651	0.451464	GeneID:101117394	ATRX chromatin remodeler	GO:0000212,GO:0000780,GO:0000784,GO:0003677,GO:0003682,GO:0004386,GO:0005524,GO:0006281,GO:0006334,GO:0006336,GO:0006338,GO:0007283,GO:0010571,GO:0015616,GO:0016605,GO:0030330,GO:0030900,GO:0031297,GO:0031618,GO:0031933,GO:0032206,GO:0035064,GO:0035128,GO:0035264,GO:0042393,GO:0045944,GO:0046872,GO:0060009,GO:0070087,GO:0070192,GO:0070198,GO:0072520,GO:0072711,GO:1900112,GO:1901581,GO:1901582,GO:…	meiotic spindle organization|condensed nuclear chromosome, centromeric region|nuclear chromosome, telomeric region|DNA binding|chromatin binding|helicase activity|ATP binding|DNA repair|nucleosome assembly|DNA replication-independent nucleosome assembly|chromatin remodeling|spermatogenesis|positive regulation of nuclear cell cycle DNA replication|DNA translocase activity|PML body|DNA damage respo…
ATXN1	2071.94	1142.43	3001.45	2.62653	1.39316	1.02614e-37	5.32969e-37	Up	5.39466	5.52388	5.15642	1.96852	2.25055	1.57419	GeneID:101113284	ataxin 1
ATXN3	386.294	78.3198	694.267	8.85373	3.14629	1.0895e-58	1.07904e-57	Up	3.59312	3.74412	3.54972	0.573881	0.291336	0.299722	GeneID:100171397	ataxin 3	GO:0000226,GO:0001012,GO:0004843,GO:0005634,GO:0005730,GO:0005759,GO:0005789,GO:0005829,GO:0005886,GO:0006515,GO:0010810,GO:0016579,GO:0030036,GO:0031625,GO:0031966,GO:0034605,GO:0035520,GO:0035640,GO:0036459,GO:0042405,GO:0042802,GO:0043161,GO:0045104,GO:0051117,GO:0061578,GO:0070536,GO:0070932,GO:0071108,GO:0071218,GO:1904294,GO:1904379,GO:1990380	microtubule cytoskeleton organization|RNA polymerase II regulatory region DNA binding|thiol-dependent ubiquitin-specific protease activity|nucleus|nucleolus|mitochondrial matrix|endoplasmic reticulum membrane|cytosol|plasma membrane|protein quality control for misfolded or incompletely synthesized proteins|regulation of cell-substrate adhesion|protein deubiquitination|actin cytoskeleton organizat…	oas04141	Protein processing in endoplasmic reticulum
ATXN7	856.222	505.874	1206.57	2.38423	1.25352	3.49175e-17	8.99031e-17	Up	3.10235	3.26267	2.70841	1.0964	1.5442	0.961604	GeneID:101106632	ataxin 7	GO:0000226,GO:0005634,GO:0005654,GO:0005730,GO:0005829,GO:0006997,GO:0007601,GO:0015630,GO:0016363,GO:0016578,GO:0016579,GO:0036459	microtubule cytoskeleton organization|nucleus|nucleoplasm|nucleolus|cytosol|nucleus organization|visual perception|microtubule cytoskeleton|nuclear matrix|histone deubiquitination|protein deubiquitination|thiol-dependent ubiquitinyl hydrolase activity
ATXN7L2	212.079	293.531	130.627	0.445138	-1.16767	1.5308e-11	3.2203e-11	Down	0.713337	0.605555	0.685585	1.46874	1.29241	1.49052	GeneID:101103448	ataxin 7 like 2
ATXN7L3	2786.65	3783.97	1789.32	0.472885	-1.08044	3.1937e-47	2.27549e-46	Down	13.1681	12.645	12.7335	26.1521	24.9684	25.8667	GeneID:101113945	ataxin 7 like 3	GO:0000124,GO:0003713,GO:0005634,GO:0008270,GO:0010390,GO:0016578,GO:0030374,GO:0045893,GO:0071819	SAGA complex|transcription coactivator activity|nucleus|zinc ion binding|histone monoubiquitination|histone deubiquitination|nuclear receptor transcription coactivator activity|positive regulation of transcription, DNA-templated|DUBm complex
AUP1	4936.96	6830.85	3043.07	0.445514	-1.16646	4.91307e-43	3.05565e-42	Down	52.9012	54.1234	60.5925	114.141	115.413	125.381	GeneID:101119707	AUP1 lipid droplet regulating VLDL assembly factor	GO:0000839,GO:0016020,GO:0030176,GO:0030433,GO:0030970,GO:0043130,GO:0070062,GO:0097027	Hrd1p ubiquitin ligase ERAD-L complex|membrane|integral component of endoplasmic reticulum membrane|ubiquitin-dependent ERAD pathway|retrograde protein transport, ER to cytosol|ubiquitin binding|extracellular exosome|ubiquitin-protein transferase activator activity
AURKAIP1	3185.99	4848.98	1523	0.314111	-1.67065	8.69981e-53	7.29783e-52	Down	37.9049	41.3102	40.6537	115.517	105.46	138.648	GeneID:101106608	aurora kinase A interacting protein 1	GO:0005634,GO:0005654,GO:0005739,GO:0005743,GO:0005840,GO:0006397,GO:0043231,GO:0045839,GO:0045862,GO:0070125,GO:0070126	nucleus|nucleoplasm|mitochondrion|mitochondrial inner membrane|ribosome|mRNA processing|intracellular membrane-bounded organelle|negative regulation of mitotic nuclear division|positive regulation of proteolysis|mitochondrial translational elongation|mitochondrial translational termination
AURKB	1072.41	1544.86	599.966	0.388425	-1.36429	1.39121e-38	7.42769e-38	Down	12.8934	12.3235	12.444	28.6474	29.6614	33.1619	GeneID:101106860	aurora kinase B	GO:0000122,GO:0000775,GO:0000780,GO:0002903,GO:0004674,GO:0005524,GO:0005634,GO:0005694,GO:0005737,GO:0005876,GO:0006468,GO:0007052,GO:0007094,GO:0009838,GO:0030496,GO:0031616,GO:0032133,GO:0032465,GO:0032466,GO:0032467,GO:0034501,GO:0034644,GO:0035174,GO:0036089,GO:0042585,GO:0043988,GO:0044878,GO:0046872,GO:0051233,GO:0051256,GO:0070938,GO:1990385	negative regulation of transcription by RNA polymerase II|chromosome, centromeric region|condensed nuclear chromosome, centromeric region|negative regulation of B cell apoptotic process|protein serine/threonine kinase activity|ATP binding|nucleus|chromosome|cytoplasm|spindle microtubule|protein phosphorylation|mitotic spindle organization|mitotic spindle assembly checkpoint|abscission|midbody|spi…
AURKC	18.0424	9.61434	26.4704	2.75751	1.46337	0.0115342	0.015746	Up	0.455414	0.546167	0.404401	0.0664725	0.213861	0.199763	GeneID:101104774	aurora kinase C	GO:0000780,GO:0000793,GO:0004672,GO:0004712,GO:0005524,GO:0005737,GO:0005819,GO:0005876,GO:0006468,GO:0007052,GO:0007283,GO:0008608,GO:0016570,GO:0030496,GO:0031616,GO:0032133,GO:0032465,GO:0032467,GO:0035174,GO:0048599,GO:0051233,GO:0051256,GO:0051301,GO:0051321	condensed nuclear chromosome, centromeric region|condensed chromosome|protein kinase activity|protein serine/threonine/tyrosine kinase activity|ATP binding|cytoplasm|spindle|spindle microtubule|protein phosphorylation|mitotic spindle organization|spermatogenesis|attachment of spindle microtubules to kinetochore|histone modification|midbody|spindle pole centrosome|chromosome passenger complex|regu…
AVIL	116.753	15.4757	218.031	14.0646	3.81399	1.83796e-35	8.88999e-35	Up	1.5976	1.62079	1.3341	0.0653325	0.15522	0.0850796	GeneID:101114855	advillin	GO:0003779,GO:0005737,GO:0007010,GO:0007399,GO:0010976,GO:0015629,GO:0030424,GO:0042995,GO:0043005,GO:0051015,GO:0051693,GO:0060271	actin binding|cytoplasm|cytoskeleton organization|nervous system development|positive regulation of neuron projection development|actin cytoskeleton|axon|cell projection|neuron projection|actin filament binding|actin filament capping|cilium assembly
AVL9	997.997	530.856	1465.14	2.75846	1.46386	1.35786e-29	5.40353e-29	Up	6.28004	5.91884	6.11369	2.27145	2.43436	1.5822	GeneID:101121004	AVL9 cell migration associated	GO:0016021,GO:0016477,GO:0055037	integral component of membrane|cell migration|recycling endosome
AVPI1	1032.54	1603.14	461.944	0.288211	-1.7948	1.29185e-52	1.07664e-51	Down	7.89548	7.92395	8.8258	25.6923	24.6575	30.2658	GeneID:101115666	arginine vasopressin induced 1	GO:0000187,GO:0007049	activation of MAPK activity|cell cycle
AZIN1	2297.65	1521.28	3074.02	2.02032	1.01458	1.74893e-26	6.22893e-26	Up	19.6195	18.7572	19.6818	9.06179	10.2981	7.82299	GeneID:101122702	antizyme inhibitor 1	GO:0004586,GO:0005634,GO:0005737,GO:0005829,GO:0006521,GO:0033387,GO:0042177,GO:0042978,GO:1902269	ornithine decarboxylase activity|nucleus|cytoplasm|cytosol|regulation of cellular amino acid metabolic process|putrescine biosynthetic process from ornithine|negative regulation of protein catabolic process|ornithine decarboxylase activator activity|positive regulation of polyamine transmembrane transport
B2M	3514.72	2198.65	4830.79	2.19694	1.13549	9.45369e-46	6.44976e-45	Up	118.405	124.586	130.76	57.777	54.6567	48.4249	GeneID:443295	beta-2-microglobulin	GO:0001916,GO:0002237,GO:0002481,GO:0002726,GO:0005576,GO:0005794,GO:0005829,GO:0006955,GO:0009897,GO:0010977,GO:0019885,GO:0033077,GO:0033216,GO:0042026,GO:0042612,GO:0042802,GO:0045646,GO:0048260,GO:0055072,GO:0071283,GO:1900121,GO:1900390,GO:1904434,GO:1904437,GO:1990712	positive regulation of T cell mediated cytotoxicity|response to molecule of bacterial origin|antigen processing and presentation of exogenous protein antigen via MHC class Ib, TAP-dependent|positive regulation of T cell cytokine production|extracellular region|Golgi apparatus|cytosol|immune response|external side of plasma membrane|negative regulation of neuron projection development|antigen proc…	oas04612,oas05163,oas05166,oas05168,oas05169,oas05170	Antigen processing and presentation|Human cytomegalovirus infection|Human T-cell leukemia virus 1 infection|Herpes simplex virus 1 infection|Epstein-Barr virus infection|Human immunodeficiency virus 1 infection
B3GALNT1	167.65	70.4345	264.865	3.7566	1.90943	3.59722e-18	9.62822e-18	Up	1.65216	2.09758	2.1523	0.640922	0.455165	0.390803	GeneID:101104544	beta-1,3-N-acetylgalactosaminyltransferase 1 (globoside blood group)	GO:0000139,GO:0005783,GO:0005794,GO:0006486,GO:0006487,GO:0008376,GO:0008499,GO:0009312,GO:0016021,GO:0047273	Golgi membrane|endoplasmic reticulum|Golgi apparatus|protein glycosylation|protein N-linked glycosylation|acetylgalactosaminyltransferase activity|UDP-galactose:beta-N-acetylglucosamine beta-1,3-galactosyltransferase activity|oligosaccharide biosynthetic process|integral component of membrane|galactosylgalactosylglucosylceramide beta-D-acetylgalactosaminyltransferase activity	oas00601,oas00603	Glycosphingolipid biosynthesis - lacto and neolacto series|Glycosphingolipid biosynthesis - globo and isoglobo series
B3GALT2	135.247	34.6067	235.888	6.83835	2.77365	2.34704e-22	7.27624e-22	Up	1.56179	1.89907	1.50503	0.237078	0.117346	0.329847	GeneID:101121025	beta-1,3-galactosyltransferase 2			oas00601	Glycosphingolipid biosynthesis - lacto and neolacto series
B3GALT4	143.705	214.328	73.082	0.341203	-1.5513	2.47435e-10	4.96238e-10	Down	1.21334	1.30887	1.37683	3.58691	2.60943	4.56244	GeneID:101111585	beta-1,3-galactosyltransferase 4			oas00604	Glycosphingolipid biosynthesis - ganglio series
B3GAT2	9.42865	16.2142	2.64314	0.163159	-2.61565	0.00333026	0.00473365	Down	0	0.0840425	0.0838725	0.416175	0.196184	0.357341	GeneID:101102248	beta-1,3-glucuronyltransferase 2	GO:0000139,GO:0006486,GO:0015018,GO:0016021,GO:0046872,GO:0050650	Golgi membrane|protein glycosylation|galactosylgalactosylxylosylprotein 3-beta-glucuronosyltransferase activity|integral component of membrane|metal ion binding|chondroitin sulfate proteoglycan biosynthetic process	oas00515	Mannose type O-glycan biosynthesis
B3GAT3	1629.67	2392.22	867.117	0.362527	-1.46384	4.92763e-44	3.18808e-43	Down	13.2168	13.8308	14.244	34.431	32.8609	40.1	GeneID:101111917	beta-1,3-glucuronyltransferase 3	GO:0000139,GO:0005801,GO:0006024,GO:0006486,GO:0015012,GO:0015018,GO:0015020,GO:0016021,GO:0043085,GO:0046872,GO:0050650,GO:0050651,GO:0072542,GO:0090316	Golgi membrane|cis-Golgi network|glycosaminoglycan biosynthetic process|protein glycosylation|heparan sulfate proteoglycan biosynthetic process|galactosylgalactosylxylosylprotein 3-beta-glucuronosyltransferase activity|glucuronosyltransferase activity|integral component of membrane|positive regulation of catalytic activity|metal ion binding|chondroitin sulfate proteoglycan biosynthetic process|de…	oas00532,oas00534	Glycosaminoglycan biosynthesis - chondroitin sulfate / dermatan sulfate|Glycosaminoglycan biosynthesis - heparan sulfate / heparin
B3GNT2	1390.75	770.973	2010.53	2.60716	1.38248	8.52505e-43	5.25817e-42	Up	18.7778	19.4247	21.0227	7.05611	8.07937	6.33937	GeneID:101117403	UDP-GlcNAc:betaGal beta-1,3-N-acetylglucosaminyltransferase 2			oas00533,oas00601	Glycosaminoglycan biosynthesis - keratan sulfate|Glycosphingolipid biosynthesis - lacto and neolacto series
B3GNT4	5.29216	1.33212	9.25221	6.98383	2.80402	0.0130701	0.0177604	Up	0.159104	0.0960202	0.191652	0.0150949	0.014943	0.0302421	GeneID:101102267	UDP-GlcNAc:betaGal beta-1,3-N-acetylglucosaminyltransferase 4	GO:0000139,GO:0005783,GO:0005794,GO:0006486,GO:0008376,GO:0008499,GO:0008532,GO:0016021,GO:0016266,GO:0018146,GO:0030311	Golgi membrane|endoplasmic reticulum|Golgi apparatus|protein glycosylation|acetylgalactosaminyltransferase activity|UDP-galactose:beta-N-acetylglucosamine beta-1,3-galactosyltransferase activity|N-acetyllactosaminide beta-1,3-N-acetylglucosaminyltransferase activity|integral component of membrane|O-glycan processing|keratan sulfate biosynthetic process|poly-N-acetyllactosamine biosynthetic process	oas00601	Glycosphingolipid biosynthesis - lacto and neolacto series
B3GNT5	176.621	42.7404	310.502	7.27894	2.86373	1.15834e-38	6.19841e-38	Up	1.17692	0.965357	1.15679	0.142897	0.115141	0.169777	GeneID:101103203	UDP-GlcNAc:betaGal beta-1,3-N-acetylglucosaminyltransferase 5	GO:0000139,GO:0005622,GO:0005783,GO:0005794,GO:0006486,GO:0007417,GO:0007420,GO:0008376,GO:0008378,GO:0008457,GO:0008532,GO:0016021,GO:0030311,GO:0047256	Golgi membrane|intracellular|endoplasmic reticulum|Golgi apparatus|protein glycosylation|central nervous system development|brain development|acetylgalactosaminyltransferase activity|galactosyltransferase activity|beta-galactosyl-N-acetylglucosaminylgalactosylglucosyl-ceramide beta-1,3-acetylglucosaminyltransferase activity|N-acetyllactosaminide beta-1,3-N-acetylglucosaminyltransferase activity|i…	oas00601	Glycosphingolipid biosynthesis - lacto and neolacto series
B3GNT8	153.879	231.351	76.407	0.330322	-1.59805	8.53597e-16	2.09518e-15	Down	0.409839	0.377044	0.371264	1.02898	1.12659	1.15427	GeneID:101123400	UDP-GlcNAc:betaGal beta-1,3-N-acetylglucosaminyltransferase 8	GO:0000139,GO:0005783,GO:0005794,GO:0006486,GO:0008376,GO:0008499,GO:0008532,GO:0016021,GO:0016262,GO:0016266,GO:0030311,GO:0070062	Golgi membrane|endoplasmic reticulum|Golgi apparatus|protein glycosylation|acetylgalactosaminyltransferase activity|UDP-galactose:beta-N-acetylglucosamine beta-1,3-galactosyltransferase activity|N-acetyllactosaminide beta-1,3-N-acetylglucosaminyltransferase activity|integral component of membrane|protein N-acetylglucosaminyltransferase activity|O-glycan processing|poly-N-acetyllactosamine biosynt…
B4GALNT4	21.6377	32.6918	10.5835	0.323755	-1.62703	0.0027631	0.00394931	Down	0.115668	0.054294	0.077406	0.153635	0.325905	0.241846	GeneID:101105615	beta-1,4-N-acetyl-galactosaminyltransferase 4	GO:0008376,GO:0016021,GO:0032580,GO:0033842	acetylgalactosaminyltransferase activity|integral component of membrane|Golgi cisterna membrane|N-acetyl-beta-glucosaminyl-glycoprotein 4-beta-N-acetylgalactosaminyltransferase activity
B4GALT6	538.712	175.573	901.852	5.13947	2.36162	4.0085e-65	4.75606e-64	Up	5.49655	5.09657	4.46707	0.841268	0.936255	0.989288	GeneID:101114836	beta-1,4-galactosyltransferase 6			oas00600	Sphingolipid metabolism
B9D1	1479.4	2212.34	746.461	0.337459	-1.56722	1.56052e-44	1.02749e-43	Down	6.61393	6.86923	6.83732	17.2412	17.8852	21.6293	GeneID:101110346	B9 domain containing 1	GO:0001701,GO:0001944,GO:0005813,GO:0005829,GO:0007224,GO:0008158,GO:0016020,GO:0032880,GO:0035869,GO:0036038,GO:0036064,GO:0042733,GO:0043010,GO:0060271,GO:0060563,GO:0097711	in utero embryonic development|vasculature development|centrosome|cytosol|smoothened signaling pathway|hedgehog receptor activity|membrane|regulation of protein localization|ciliary transition zone|MKS complex|ciliary basal body|embryonic digit morphogenesis|camera-type eye development|cilium assembly|neuroepithelial cell differentiation|ciliary basal body-plasma membrane docking
B9D2	444.796	629.334	260.258	0.413639	-1.27356	2.66082e-23	8.52945e-23	Down	6.86704	6.36594	6.99609	14.6832	15.3055	16.1698	GeneID:101102082	B9 domain containing 2	GO:0005634,GO:0005737,GO:0005813,GO:0036038,GO:0036064,GO:0043015,GO:0060271	nucleus|cytoplasm|centrosome|MKS complex|ciliary basal body|gamma-tubulin binding|cilium assembly
BABAM1	2120.39	2997.41	1243.37	0.414865	-1.26929	1.38887e-40	7.95256e-40	Down	21.2521	20.7542	22.799	48.7852	45.2768	53.2947	GeneID:101113145	BRISC and BRCA1 A complex member 1	GO:0005634,GO:0005737,GO:0006302,GO:0006325,GO:0007049,GO:0010212,GO:0045739,GO:0051301,GO:0070531,GO:0070536,GO:0070552,GO:0071425,GO:0072425	nucleus|cytoplasm|double-strand break repair|chromatin organization|cell cycle|response to ionizing radiation|positive regulation of DNA repair|cell division|BRCA1-A complex|protein K63-linked deubiquitination|BRISC complex|hematopoietic stem cell proliferation|signal transduction involved in G2 DNA damage checkpoint	oas03440	Homologous recombination
BACH1	1323.15	639.586	2006.71	3.13696	1.64937	2.65558e-62	2.94571e-61	Up	9.10061	9.50024	8.27096	2.65602	2.93618	2.50535	GeneID:101117134	BTB domain and CNC homolog 1	GO:0000083,GO:0000117,GO:0000122,GO:0000980,GO:0000981,GO:0001078,GO:0001205,GO:0001206,GO:0003700,GO:0005634,GO:0005737,GO:0006281,GO:0006355,GO:0020037,GO:0061418	regulation of transcription involved in G1/S transition of mitotic cell cycle|regulation of transcription involved in G2/M transition of mitotic cell cycle|negative regulation of transcription by RNA polymerase II|RNA polymerase II distal enhancer sequence-specific DNA binding|DNA-binding transcription factor activity, RNA polymerase II-specific|proximal promoter DNA-binding transcription repress…
BAD	2081.69	3135.39	1028	0.327901	-1.60867	1.30329e-50	1.0263e-49	Down	23.243	25.3368	23.6805	69.1671	60.8099	77.8323	GeneID:780444	BCL2 associated agonist of cell death			oas01521,oas01522,oas01524,oas04012,oas04014,oas04022,oas04024,oas04062,oas04140,oas04151,oas04210,oas04370,oas04510,oas04722,oas04910,oas04919,oas05010,oas05014,oas05145,oas05152,oas05160,oas05161,oas05162,oas05165,oas05168,oas05170,oas05200,oas05203,oas05210,oas05211,oas05212,oas05213,oas05215,oas05218,oas05220,oas05221,oas05223,oas05225	EGFR tyrosine kinase inhibitor resistance|Endocrine resistance|Platinum drug resistance|ErbB signaling pathway|Ras signaling pathway|cGMP-PKG signaling pathway|cAMP signaling pathway|Chemokine signaling pathway|Autophagy - animal|PI3K-Akt signaling pathway|Apoptosis|VEGF signaling pathway|Focal adhesion|Neurotrophin signaling pathway|Insulin signaling pathway|Thyroid hormone signaling pathway|Alz…
BAG3	14207.1	4745.9	23668.3	4.98748	2.31831	2.98904e-190	3.58254e-188	Up	235.243	241.893	255.455	43.733	45.4489	49.3843	GeneID:101108530	BCL2 associated athanogene 3
BAG6	13171.5	18285.9	8057.13	0.440628	-1.18237	3.40462e-63	3.83678e-62	Down	50.4248	51.1458	50.7421	107.973	104.656	113.639	GeneID:100135439	BCL2 associated athanogene 6	GO:0001822,GO:0002376,GO:0005634,GO:0005829,GO:0006325,GO:0006511,GO:0006915,GO:0007130,GO:0007283,GO:0007420,GO:0010498,GO:0018393,GO:0030154,GO:0030324,GO:0030433,GO:0031593,GO:0032435,GO:0042771,GO:0042981,GO:0043022,GO:0045861,GO:0045995,GO:0050821,GO:0061857,GO:0070059,GO:0070062,GO:0070628,GO:0071712,GO:0071816,GO:0071818	kidney development|immune system process|nucleus|cytosol|chromatin organization|ubiquitin-dependent protein catabolic process|apoptotic process|synaptonemal complex assembly|spermatogenesis|brain development|proteasomal protein catabolic process|internal peptidyl-lysine acetylation|cell differentiation|lung development|ubiquitin-dependent ERAD pathway|polyubiquitin modification-dependent protein …
BAHCC1	882.296	1187.48	577.114	0.48599	-1.041	3.88793e-27	1.41137e-26	Down	1.6013	1.50059	1.56989	3.01818	3.15575	2.90928	GeneID:101109374	BAH domain and coiled-coil containing 1	GO:0003682	chromatin binding
BAK1	2814.18	4281.09	1347.28	0.314734	-1.66779	1.86734e-53	1.59769e-52	Down	9.40544	9.72	10.1753	27.1986	26.6757	33.8477	GeneID:443062	BCL2 antagonist/killer 1			oas01524,oas04141,oas04210,oas04215,oas05160,oas05162,oas05163,oas05164,oas05165,oas05167,oas05168,oas05169,oas05170,oas05200,oas05202,oas05203,oas05206,oas05210,oas05212,oas05213,oas05214,oas05216,oas05217,oas05218,oas05220,oas05222,oas05223,oas05224,oas05225,oas05226	Platinum drug resistance|Protein processing in endoplasmic reticulum|Apoptosis|Apoptosis - multiple species|Hepatitis C|Measles|Human cytomegalovirus infection|Influenza A|Human papillomavirus infection|Kaposi sarcoma-associated herpesvirus infection|Herpes simplex virus 1 infection|Epstein-Barr virus infection|Human immunodeficiency virus 1 infection|Pathways in cancer|Transcriptional misregulat…
BANK1	151.317	92.9412	209.693	2.25531	1.17333	9.85462e-07	1.70551e-06	Up	1.55707	1.62641	1.57804	0.468747	0.935091	0.590508	GeneID:101122360	B cell scaffold protein with ankyrin repeats 1	GO:0005102,GO:0009617,GO:0042113,GO:0043410,GO:0045947,GO:0050731,GO:0050869,GO:0051898,GO:1900165,GO:1990782	signaling receptor binding|response to bacterium|B cell activation|positive regulation of MAPK cascade|negative regulation of translational initiation|positive regulation of peptidyl-tyrosine phosphorylation|negative regulation of B cell activation|negative regulation of protein kinase B signaling|negative regulation of interleukin-6 secretion|protein tyrosine kinase binding
BANP	575.967	379.955	771.979	2.03175	1.02272	2.08489e-20	6.05101e-20	Up	8.75674	8.76315	8.53322	3.9481	4.23232	3.9338	GeneID:101105771	BTG3 associated nuclear protein	GO:0003677,GO:0005634,GO:0006325,GO:0007049,GO:0007275	DNA binding|nucleus|chromatin organization|cell cycle|multicellular organism development
BAP1	3585.43	4937.06	2233.8	0.45249	-1.14404	4.38807e-42	2.64087e-41	Down	17.146	16.5539	18.1249	34.4862	35.1949	38.3764	GeneID:101111666	BRCA1 associated protein 1	GO:0001558,GO:0003682,GO:0004843,GO:0005634,GO:0005737,GO:0006511,GO:0016579,GO:0035517,GO:0035520,GO:0035522,GO:0036459,GO:0051726,GO:0071108	regulation of cell growth|chromatin binding|thiol-dependent ubiquitin-specific protease activity|nucleus|cytoplasm|ubiquitin-dependent protein catabolic process|protein deubiquitination|PR-DUB complex|monoubiquitinated protein deubiquitination|monoubiquitinated histone H2A deubiquitination|thiol-dependent ubiquitinyl hydrolase activity|regulation of cell cycle|protein K48-linked deubiquitination
BARD1	117.844	70.9906	164.697	2.31682	1.21215	3.87589e-07	6.82055e-07	Up	1.6126	1.79993	1.78584	0.730426	0.889187	0.504275	GeneID:101108373	BRCA1 associated RING domain 1			oas03440	Homologous recombination
BATF3	8.21531	13.4647	2.96594	0.220451	-2.18147	0.0210896	0.0280989	Down	0	0.0610185	0.213133	0.460436	0.455802	0.259445	GeneID:101115558	basic leucine zipper ATF-like transcription factor 3	GO:0000122,GO:0000978,GO:0001078,GO:0005634,GO:0009615,GO:0043011,GO:0097028	negative regulation of transcription by RNA polymerase II|RNA polymerase II proximal promoter sequence-specific DNA binding|proximal promoter DNA-binding transcription repressor activity, RNA polymerase II-specific|nucleus|response to virus|myeloid dendritic cell differentiation|dendritic cell differentiation	oas05235	PD-L1 expression and PD-1 checkpoint pathway in cancer
BAX	2196.36	3077.01	1315.72	0.42765	-1.2255	5.6502e-35	2.69969e-34	Down	41.8262	40.9012	46.2004	89.7833	89.9111	104.581	GeneID:443059	BCL2 associated X, apoptosis regulator	GO:0001541,GO:0001764,GO:0001777,GO:0001782,GO:0001783,GO:0001822,GO:0001836,GO:0001844,GO:0001974,GO:0002262,GO:0002352,GO:0002358,GO:0002904,GO:0005634,GO:0005635,GO:0005737,GO:0005739,GO:0005741,GO:0005757,GO:0005783,GO:0005789,GO:0005829,GO:0006687,GO:0006808,GO:0006919,GO:0007281,GO:0008053,GO:0008289,GO:0008625,GO:0008630,GO:0008635,GO:0008637,GO:0009566,GO:0009636,GO:0009651,GO:0010248,GO:…	ovarian follicle development|neuron migration|T cell homeostatic proliferation|B cell homeostasis|B cell apoptotic process|kidney development|release of cytochrome c from mitochondria|protein insertion into mitochondrial membrane involved in apoptotic signaling pathway|blood vessel remodeling|myeloid cell homeostasis|B cell negative selection|B cell homeostatic proliferation|positive regulation o…	oas01521,oas01522,oas01524,oas04071,oas04115,oas04141,oas04210,oas04211,oas04215,oas04217,oas04722,oas04932,oas04933,oas05014,oas05016,oas05020,oas05152,oas05160,oas05161,oas05162,oas05163,oas05164,oas05165,oas05166,oas05167,oas05168,oas05169,oas05170,oas05200,oas05202,oas05203,oas05210,oas05212,oas05213,oas05214,oas05216,oas05217,oas05218,oas05220,oas05222,oas05223,oas05224,oas05225,oas05226	EGFR tyrosine kinase inhibitor resistance|Endocrine resistance|Platinum drug resistance|Sphingolipid signaling pathway|p53 signaling pathway|Protein processing in endoplasmic reticulum|Apoptosis|Longevity regulating pathway|Apoptosis - multiple species|Necroptosis|Neurotrophin signaling pathway|Non-alcoholic fatty liver disease (NAFLD)|AGE-RAGE signaling pathway in diabetic complications|Amyotrop…
BAZ1A	2144.45	330.007	3958.9	11.9967	3.58457	7.82406e-26	2.72216e-25	Up	18.9253	19.0406	18.227	2.09567	0.857082	1.47663	GeneID:101104014	bromodomain adjacent to zinc finger domain 1A	GO:0006261,GO:0006338,GO:0006357,GO:0008623,GO:0016573,GO:0016590,GO:0046872	DNA-dependent DNA replication|chromatin remodeling|regulation of transcription by RNA polymerase II|CHRAC|histone acetylation|ACF complex|metal ion binding
BAZ2B	336.247	25.3422	647.152	25.715	4.68454	1.3442e-91	2.70428e-90	Up	1.84883	1.62479	1.85588	0.0412116	0.050996	0.103208	GeneID:101111257	bromodomain adjacent to zinc finger domain 2B	GO:0003677,GO:0005634,GO:0006338,GO:0006357,GO:0046872	DNA binding|nucleus|chromatin remodeling|regulation of transcription by RNA polymerase II|metal ion binding
BBC3	237.997	344.389	131.605	0.382331	-1.38711	1.20861e-14	2.8432e-14	Down	1.96966	1.7084	2.02015	4.31969	4.28962	5.4395	GeneID:101123490	BCL2 binding component 3
BBOF1	12.3886	4.95476	19.8225	4.00269	2.00097	0.0042365	0.00597793	Up	0.198592	0.114144	0.256305	0.0538322	0.0355269	0.044938	GeneID:101105921	basal body orientation factor 1	GO:0005737,GO:0036064,GO:0044458	cytoplasm|ciliary basal body|motile cilium assembly
BBS10	134.262	31.4166	237.107	7.55494	2.91742	1.08158e-32	4.76683e-32	Up	1.9479	1.51734	1.80095	0.22927	0.192575	0.236628	GeneID:101122679	Bardet-Biedl syndrome 10	GO:0005524,GO:0005929	ATP binding|cilium
BBS12	200.601	98.5847	302.617	3.0653	1.61603	1.05512e-15	2.57908e-15	Up	3.55697	3.2211	3.39255	1.09335	1.3113	0.737183	GeneID:101103758	Bardet-Biedl syndrome 12	GO:0005524,GO:0005929	ATP binding|cilium
BBS7	243.165	61.9428	424.387	6.86183	2.77859	1.33385e-43	8.48232e-43	Up	3.90764	3.06673	3.16333	0.485843	0.362565	0.546585	GeneID:101107867	Bardet-Biedl syndrome 7
BBS9	288.72	120.101	457.338	3.80414	1.92757	9.93043e-27	3.5574e-26	Up	3.36571	3.02266	3.42112	0.744631	1.0559	0.638403	GeneID:101118868	Bardet-Biedl syndrome 9	GO:0000242,GO:0005829,GO:0005929,GO:0007601,GO:0015031,GO:0016020,GO:0034451,GO:0034464,GO:0035869,GO:0045444,GO:0050896,GO:0060170,GO:0060271,GO:0061512	pericentriolar material|cytosol|cilium|visual perception|protein transport|membrane|centriolar satellite|BBSome|ciliary transition zone|fat cell differentiation|response to stimulus|ciliary membrane|cilium assembly|protein localization to cilium
BBX	2002.4	603.856	3400.95	5.6348	2.49436	5.98376e-136	2.61199e-134	Up	9.78516	9.28628	9.01872	1.43918	1.51678	1.74709	GeneID:101115417	BBX high mobility group box domain containing	GO:0000981,GO:0003677,GO:0005654,GO:0005829,GO:0060348	DNA-binding transcription factor activity, RNA polymerase II-specific|DNA binding|nucleoplasm|cytosol|bone development
BCAN	50.6832	69.6251	31.7413	0.456287	-1.13199	0.00127464	0.00186656	Down	0.313497	0.185963	0.274346	0.50334	0.437877	0.657005	GeneID:101105963	brevican	GO:0005540,GO:0007155,GO:0007417,GO:0030246,GO:0031012	hyaluronic acid binding|cell adhesion|central nervous system development|carbohydrate binding|extracellular matrix
BCAP29	296.738	160.565	432.912	2.69684	1.43127	7.80415e-18	2.05768e-17	Up	7.71728	6.53157	7.17347	2.92559	2.03803	2.54301	GeneID:101104394	B cell receptor associated protein 29	GO:0005789,GO:0005887,GO:0006886,GO:0006888,GO:0006915,GO:0070973	endoplasmic reticulum membrane|integral component of plasma membrane|intracellular protein transport|ER to Golgi vesicle-mediated transport|apoptotic process|protein localization to endoplasmic reticulum exit site
BCAS2	560.139	333.764	786.515	2.35705	1.23698	1.55858e-20	4.54402e-20	Up	24.0248	21.3256	21.991	10.1512	7.5567	9.28344	GeneID:101109325	BCAS2 pre-mRNA processing factor	GO:0000375,GO:0000398,GO:0000974,GO:0005654,GO:0005681,GO:0005730,GO:0005813,GO:0008380,GO:0016607,GO:0071007	RNA splicing, via transesterification reactions|mRNA splicing, via spliceosome|Prp19 complex|nucleoplasm|spliceosomal complex|nucleolus|centrosome|RNA splicing|nuclear speck|U2-type catalytic step 2 spliceosome	oas03040	Spliceosome
BCAS4	1084.77	1501.2	668.332	0.445292	-1.16718	6.51564e-25	2.20403e-24	Down	17.8137	16.94	18.5145	35.8702	34.5715	42.3498	GeneID:101118977	breast carcinoma amplified sequence 4
BCAT1	1008.95	522.782	1495.12	2.85945	1.51574	2.0322e-44	1.33185e-43	Up	8.65812	8.14175	8.76467	3.26755	2.59938	2.58751	GeneID:443485	branched chain amino acid transaminase 1	GO:0005737,GO:0009082,GO:0052654,GO:0052655,GO:0052656	cytoplasm|branched-chain amino acid biosynthetic process|L-leucine transaminase activity|L-valine transaminase activity|L-isoleucine transaminase activity	oas00270,oas00280,oas00290,oas00770	Cysteine and methionine metabolism|Valine, leucine and isoleucine degradation|Valine, leucine and isoleucine biosynthesis|Pantothenate and CoA biosynthesis
BCAT2	1574.64	2200.67	948.62	0.431088	-1.21395	1.80413e-40	1.02845e-39	Down	12.9988	14.7978	13.6263	29.3495	30.1492	31.2063	GeneID:443450	branched chain amino acid transaminase 2	GO:0004084,GO:0005739,GO:0006550,GO:0009098,GO:0009099,GO:0010817,GO:0052654,GO:0052655,GO:0052656,GO:1990830	branched-chain-amino-acid transaminase activity|mitochondrion|isoleucine catabolic process|leucine biosynthetic process|valine biosynthetic process|regulation of hormone levels|L-leucine transaminase activity|L-valine transaminase activity|L-isoleucine transaminase activity|cellular response to leukemia inhibitory factor	oas00270,oas00280,oas00290,oas00770	Cysteine and methionine metabolism|Valine, leucine and isoleucine degradation|Valine, leucine and isoleucine biosynthesis|Pantothenate and CoA biosynthesis
BCCIP	715.994	419.932	1012.06	2.4108	1.26951	8.43088e-23	2.65386e-22	Up	22.6972	22.6294	22.6503	9.97907	7.17502	9.47026	GeneID:101116189	BRCA2 and CDKN1A interacting protein	GO:0000055,GO:0000079,GO:0000132,GO:0000226,GO:0005654,GO:0005813,GO:0005814,GO:0005829,GO:0006281,GO:0006974,GO:0007052,GO:0015631,GO:0019207,GO:0019908,GO:0034453,GO:0061101,GO:0090307,GO:0097431	ribosomal large subunit export from nucleus|regulation of cyclin-dependent protein serine/threonine kinase activity|establishment of mitotic spindle orientation|microtubule cytoskeleton organization|nucleoplasm|centrosome|centriole|cytosol|DNA repair|cellular response to DNA damage stimulus|mitotic spindle organization|tubulin binding|kinase regulator activity|nuclear cyclin-dependent protein kin…
BCHE	223.757	48.2794	399.234	8.25029	3.04445	3.74544e-41	2.18711e-40	Up	4.24982	4.77559	4.3771	0.766498	0.43656	0.336582	GeneID:101102112	butyrylcholinesterase	GO:0003990,GO:0004104,GO:0005576,GO:0005641,GO:0005783,GO:0042802	acetylcholinesterase activity|cholinesterase activity|extracellular region|nuclear envelope lumen|endoplasmic reticulum|identical protein binding
BCKDHA	1173.08	1654.44	691.718	0.418158	-1.25788	4.98817e-34	2.29125e-33	Down	14.0728	12.7254	15.2115	29.7607	32.0557	32.9895	GeneID:100145857	branched chain keto acid dehydrogenase E1, alpha polypeptide	GO:0003826,GO:0003863,GO:0005947,GO:0009083,GO:0046872	alpha-ketoacid dehydrogenase activity|3-methyl-2-oxobutanoate dehydrogenase (2-methylpropanoyl-transferring) activity|mitochondrial alpha-ketoglutarate dehydrogenase complex|branched-chain amino acid catabolic process|metal ion binding	oas00280,oas00640	Valine, leucine and isoleucine degradation|Propanoate metabolism
BCKDK	1903.32	2604.82	1201.83	0.461432	-1.11581	1.51402e-32	6.63758e-32	Down	14.5227	16.333	16.1705	30.1386	31.9067	34.1011	GeneID:101104290	branched chain ketoacid dehydrogenase kinase	GO:0004674,GO:0005524,GO:0005947,GO:0009083,GO:0016310,GO:0047323	protein serine/threonine kinase activity|ATP binding|mitochondrial alpha-ketoglutarate dehydrogenase complex|branched-chain amino acid catabolic process|phosphorylation|[3-methyl-2-oxobutanoate dehydrogenase (acetyl-transferring)] kinase activity
BCL2L1	1783.12	2450.08	1116.17	0.455599	-1.13416	1.34525e-41	7.97062e-41	Down	8.01504	8.67333	8.72359	17.3516	17.3673	17.938	GeneID:443061	BCL2 like 1			oas01521,oas01524,oas04014,oas04064,oas04115,oas04137,oas04140,oas04151,oas04210,oas04215,oas04621,oas04630,oas05014,oas05145,oas05162,oas05166,oas05168,oas05170,oas05200,oas05202,oas05212,oas05220,oas05222,oas05225	EGFR tyrosine kinase inhibitor resistance|Platinum drug resistance|Ras signaling pathway|NF-kappa B signaling pathway|p53 signaling pathway|Mitophagy - animal|Autophagy - animal|PI3K-Akt signaling pathway|Apoptosis|Apoptosis - multiple species|NOD-like receptor signaling pathway|Jak-STAT signaling pathway|Amyotrophic lateral sclerosis (ALS)|Toxoplasmosis|Measles|Human T-cell leukemia virus 1 infe…
BCL2L12	1220.16	1721.02	719.297	0.41802	-1.25836	8.41778e-34	3.84041e-33	Down	19.7071	21.1437	21.4737	44.6017	44.7162	51.3023	GeneID:101112670	BCL2 like 12
BCL2L15	9.92485	1.31538	18.5343	14.0493	3.81243	8.48955e-05	0.000133527	Up	0.17645	0.177481	0.118082	0.00797171	0.015783	0.00798554	GeneID:101120453	BCL2 like 15	GO:0005634,GO:0005829,GO:0006915,GO:0042981	nucleus|cytosol|apoptotic process|regulation of apoptotic process
BCL6	3371.48	1999.38	4743.58	2.37231	1.2463	2.91998e-63	3.30114e-62	Up	10.3963	10.7162	10.0361	4.28881	4.27412	3.84976	GeneID:101110557	BCL6 transcription repressor			oas04068,oas05202	FoxO signaling pathway|Transcriptional misregulation in cancer
BCL7A	36.2974	49.766	22.8289	0.45851	-1.12497	0.00366718	0.00519845	Down	0.138871	0.2132	0.154074	0.339784	0.398146	0.305642	GeneID:101103013	BAF chromatin remodeling complex subunit BCL7A	GO:0045892	negative regulation of transcription, DNA-templated
BCL7C	4700.34	6975.23	2425.46	0.347744	-1.5239	2.25511e-45	1.52093e-44	Down	74.2926	77.2156	78.9458	208.958	176.733	238.968	GeneID:101103285	BAF chromatin remodeling complex subunit BCL7C	GO:0006915	apoptotic process
BCLAF1	3288.5	594.761	5982.24	10.0589	3.33041	8.28144e-19	2.27029e-18	Up	27.4764	27.9644	28.944	3.27781	1.41497	3.21279	GeneID:101111718	BCL2 associated transcription factor 1
BCLAF3	196.598	33.3846	359.811	10.7867	3.43118	2.97133e-55	2.65468e-54	Up	2.60486	2.7174	2.80155	0.2895	0.174748	0.247563	GeneID:101110907	BCLAF1 and THRAP3 family member 3	GO:0005739	mitochondrion
BCO2	300.332	119.844	480.82	4.00811	2.00292	1.53288e-35	7.43724e-35	Up	5.62235	5.58378	6.05963	1.60587	1.36737	1.10243	GeneID:100286796	beta-carotene oxygenase 2	GO:0001523,GO:0003834,GO:0004744,GO:0005622,GO:0005739,GO:0005759,GO:0010436,GO:0016116,GO:0016119,GO:0016121,GO:0016122,GO:0016702,GO:0042573,GO:0042574,GO:0046872,GO:0051881,GO:0055114,GO:0102076,GO:2000377	retinoid metabolic process|beta-carotene 15,15'-monooxygenase activity|retinal isomerase activity|intracellular|mitochondrion|mitochondrial matrix|carotenoid dioxygenase activity|carotenoid metabolic process|carotene metabolic process|carotene catabolic process|xanthophyll metabolic process|oxidoreductase activity, acting on single donors with incorporation of molecular oxygen, incorporation of t…
BCR	2347.54	3265.29	1429.79	0.4379	-1.19133	1.59254e-44	1.0476e-43	Down	6.5065	6.29145	6.3452	12.8318	14.2242	14.2091	GeneID:101113436	BCR activator of RhoGEF and GTPase			oas05200,oas05220	Pathways in cancer|Chronic myeloid leukemia
BDH1	2074.61	2886.08	1263.14	0.437708	-1.19196	2.3798e-38	1.26153e-37	Down	11.7999	11.591	13.1067	27.0253	24.2399	27.4343	GeneID:101104112	3-hydroxybutyrate dehydrogenase 1	GO:0003858,GO:0005654,GO:0005759,GO:0099617	3-hydroxybutyrate dehydrogenase activity|nucleoplasm|mitochondrial matrix|matrix side of mitochondrial inner membrane	oas00072,oas00650	Synthesis and degradation of ketone bodies|Butanoate metabolism
BDKRB1	1514.35	2241.34	787.358	0.351319	-1.50915	4.70302e-62	5.18432e-61	Down	10.5784	10.5852	11.5254	30.6798	27.5178	29.6666	GeneID:106991729	bradykinin receptor B1	GO:0004947,GO:0005886,GO:0006954,GO:0009612,GO:0016021	bradykinin receptor activity|plasma membrane|inflammatory response|response to mechanical stimulus|integral component of membrane	oas04020,oas04080,oas04610,oas04750,oas04810,oas05200	Calcium signaling pathway|Neuroactive ligand-receptor interaction|Complement and coagulation cascades|Inflammatory mediator regulation of TRP channels|Regulation of actin cytoskeleton|Pathways in cancer
BDNF	247.724	148.538	346.91	2.33548	1.22372	3.9431e-14	9.10634e-14	Up	4.6176	5.36252	5.35168	1.93479	2.25734	2.00737	GeneID:101117275	brain derived neurotrophic factor	GO:0005615,GO:0005737,GO:0005739,GO:0007169,GO:0007416,GO:0007422,GO:0007613,GO:0008021,GO:0008083,GO:0016607,GO:0021675,GO:0030424,GO:0030425,GO:0031410,GO:0038180,GO:0043524,GO:0045664,GO:0048471,GO:0048668,GO:0048672,GO:0048812,GO:0050804,GO:0051965,GO:1900122	extracellular space|cytoplasm|mitochondrion|transmembrane receptor protein tyrosine kinase signaling pathway|synapse assembly|peripheral nervous system development|memory|synaptic vesicle|growth factor activity|nuclear speck|nerve development|axon|dendrite|cytoplasmic vesicle|nerve growth factor signaling pathway|negative regulation of neuron apoptotic process|regulation of neuron differentiation…	oas04010,oas04014,oas04024,oas04151,oas04722,oas05016,oas05030,oas05034	MAPK signaling pathway|Ras signaling pathway|cAMP signaling pathway|PI3K-Akt signaling pathway|Neurotrophin signaling pathway|Huntington disease|Cocaine addiction|Alcoholism
BDP1	1323.32	214.121	2432.52	11.3682	3.50694	3.70707e-128	1.45233e-126	Up	5.99423	5.59742	5.81342	0.575189	0.332335	0.538074	GeneID:101117279	B double prime 1, subunit of RNA polymerase III transcription initiation factor IIIB	GO:0000126,GO:0000995,GO:0001156,GO:0003677,GO:0005654,GO:0070898	transcription factor TFIIIB complex|RNA polymerase III general transcription initiation factor activity|TFIIIC-class transcription factor complex binding|DNA binding|nucleoplasm|RNA polymerase III preinitiation complex assembly
BEAN1	10.251	15.2019	5.30014	0.348507	-1.52074	0.0460445	0.0592276	Down	0.0800727	0.0447449	0.0178617	0.0928504	0.158764	0.135289	GeneID:101103417	brain expressed associated with NEDD4 1	GO:0016021	integral component of membrane	oas04217	Necroptosis
BECN1	1761.58	1027.71	2495.46	2.42741	1.27942	1.7133e-24	5.70816e-24	Up	33.656	31.0594	31.6999	14.213	14.07	9.35861	GeneID:100913170	beclin 1	GO:0000045,GO:0000407,GO:0000423,GO:0005634,GO:0005776,GO:0005789,GO:0005802,GO:0005829,GO:0006914,GO:0006915,GO:0006995,GO:0007040,GO:0007080,GO:0008285,GO:0010008,GO:0010613,GO:0016236,GO:0019898,GO:0019901,GO:0031625,GO:0031966,GO:0032258,GO:0032465,GO:0032801,GO:0034271,GO:0034272,GO:0035032,GO:0042149,GO:0042803,GO:0043066,GO:0043548,GO:0043652,GO:0045022,GO:0045324,GO:0045335,GO:0048666,GO:…	autophagosome assembly|phagophore assembly site|mitophagy|nucleus|autophagosome|endoplasmic reticulum membrane|trans-Golgi network|cytosol|autophagy|apoptotic process|cellular response to nitrogen starvation|lysosome organization|mitotic metaphase plate congression|negative regulation of cell proliferation|endosome membrane|positive regulation of cardiac muscle hypertrophy|macroautophagy|extrinsi…	oas04136,oas04137,oas04140,oas04215,oas04371,oas05167	Autophagy - other|Mitophagy - animal|Autophagy - animal|Apoptosis - multiple species|Apelin signaling pathway|Kaposi sarcoma-associated herpesvirus infection
BEND5	32.876	46.2453	19.5066	0.421917	-1.24497	0.00242811	0.00348495	Down	0.187437	0.333558	0.332883	0.642923	0.622911	0.644039	GeneID:101107646	BEN domain containing 5	GO:0003677,GO:0005794,GO:0045892	DNA binding|Golgi apparatus|negative regulation of transcription, DNA-templated
BEND6	111.541	30.2509	192.831	6.3636	2.66984	1.75394e-19	4.92084e-19	Up	2.21417	2.31991	2.21103	0.547051	0.216618	0.24112	GeneID:101106552	BEN domain containing 6	GO:0003682,GO:0003714,GO:0005634,GO:0045666,GO:0045746	chromatin binding|transcription corepressor activity|nucleus|positive regulation of neuron differentiation|negative regulation of Notch signaling pathway
BEND7	39.5567	19.9159	59.1976	2.97918	1.57492	3.8722e-05	6.20139e-05	Up	0.159093	0.186694	0.183359	0.0475178	0.0470395	0.0728003	GeneID:101115641	BEN domain containing 7	GO:0070062	extracellular exosome
BET1	770.526	359.905	1181.15	3.28204	1.71459	3.27466e-54	2.8571e-53	Up	20.3821	21.4784	20.2857	6.61587	5.40887	5.869	GeneID:101114348	Bet1 golgi vesicular membrane trafficking protein	GO:0000139,GO:0005789,GO:0006888,GO:0015031,GO:0016020,GO:0016021,GO:0030133,GO:0033116,GO:0048208	Golgi membrane|endoplasmic reticulum membrane|ER to Golgi vesicle-mediated transport|protein transport|membrane|integral component of membrane|transport vesicle|endoplasmic reticulum-Golgi intermediate compartment membrane|COPII vesicle coating	oas04130	SNARE interactions in vesicular transport
BEX4	80.5188	28.0474	132.99	4.74057	2.24506	7.5254e-14	1.71942e-13	Up	1.35773	1.168	1.07597	0.169492	0.318793	0.22921	GeneID:105605636	brain expressed X-linked 4	GO:0000922,GO:0005634,GO:0005737,GO:0005874,GO:0007059,GO:0030334,GO:0042127,GO:0042826,GO:0043014,GO:1904428	spindle pole|nucleus|cytoplasm|microtubule|chromosome segregation|regulation of cell migration|regulation of cell proliferation|histone deacetylase binding|alpha-tubulin binding|negative regulation of tubulin deacetylation
BFSP2	2.82105	5.31019	0.331913	0.0669928	-3.89985	0.0275757	0.03632	Down	0	0.0175611	0	0.0165642	0.13118	0.116151	GeneID:101115341	beaded filament structural protein 2	GO:0005212,GO:0005882,GO:0005886,GO:0005938,GO:0045104	structural constituent of eye lens|intermediate filament|plasma membrane|cell cortex|intermediate filament cytoskeleton organization
BHLHA15	36.407	56.9327	15.8813	0.279031	-1.8415	1.3137e-05	2.15891e-05	Down	0.0857649	0.198412	0.129138	0.398708	0.46719	0.529815	GeneID:114110552	basic helix-loop-helix family member a15	GO:0000977,GO:0000981,GO:0001228,GO:0005634,GO:0006851,GO:0007030,GO:0007186,GO:0007267,GO:0010832,GO:0019722,GO:0030968,GO:0042149,GO:0042593,GO:0042803,GO:0048312,GO:0048469	RNA polymerase II regulatory region sequence-specific DNA binding|DNA-binding transcription factor activity, RNA polymerase II-specific|DNA-binding transcription activator activity, RNA polymerase II-specific|nucleus|mitochondrial calcium ion transmembrane transport|Golgi organization|G protein-coupled receptor signaling pathway|cell-cell signaling|negative regulation of myotube differentiation|c…	oas04950	Maturity onset diabetes of the young
BHLHE40	1703.95	2758.64	649.255	0.235341	-2.08717	5.57678e-137	2.49596e-135	Down	13.8757	14.6994	14.1901	59.6417	58.1849	53.9255	GeneID:100169939	basic helix-loop-helix family member e40	GO:0003714,GO:0005634,GO:0005737,GO:0045892,GO:0046983,GO:0048511,GO:0070888	transcription corepressor activity|nucleus|cytoplasm|negative regulation of transcription, DNA-templated|protein dimerization activity|rhythmic process|E-box binding	oas04710	Circadian rhythm
BICC1	5323.45	2987.52	7659.39	2.56358	1.35816	4.18419e-64	4.8466e-63	Up	38.5213	36.2658	35.8101	13.6638	14.8678	12.2668	GeneID:101119363	BicC family RNA binding protein 1	GO:0003723,GO:0005737,GO:0007368,GO:0007507,GO:0090090	RNA binding|cytoplasm|determination of left/right symmetry|heart development|negative regulation of canonical Wnt signaling pathway
BID	2976.48	4185.04	1767.93	0.422473	-1.24307	8.00992e-52	6.51434e-51	Down	34.6889	35.6181	37.2982	76.3859	79.9511	84.012	GeneID:101117837	BH3 interacting domain death agonist	GO:0005741,GO:0006915,GO:0043065	mitochondrial outer membrane|apoptotic process|positive regulation of apoptotic process	oas01524,oas04071,oas04115,oas04210,oas04215,oas04217,oas04650,oas04932,oas05010,oas05014,oas05152,oas05160,oas05161,oas05162,oas05163,oas05164,oas05167,oas05168,oas05169,oas05170,oas05200,oas05416	Platinum drug resistance|Sphingolipid signaling pathway|p53 signaling pathway|Apoptosis|Apoptosis - multiple species|Necroptosis|Natural killer cell mediated cytotoxicity|Non-alcoholic fatty liver disease (NAFLD)|Alzheimer disease|Amyotrophic lateral sclerosis (ALS)|Tuberculosis|Hepatitis C|Hepatitis B|Measles|Human cytomegalovirus infection|Influenza A|Kaposi sarcoma-associated herpesvirus infec…
BIN1	1305.15	1837.49	772.807	0.420654	-1.24929	1.50624e-30	6.19445e-30	Down	7.83253	8.24127	8.81055	17.6714	17.3341	20.7685	GeneID:101119119	bridging integrator 1			oas04144,oas04666	Endocytosis|Fc gamma R-mediated phagocytosis
BIN3	706.362	1094.11	318.615	0.291218	-1.77983	1.06924e-47	7.72334e-47	Down	4.9402	4.70086	3.9165	14.4737	14.0644	15.4192	GeneID:101114242	bridging integrator 3	GO:0000917,GO:0005737,GO:0005884,GO:0007015,GO:0008093,GO:0008104,GO:0009826,GO:0010591,GO:0014839,GO:0048741,GO:0061640	division septum assembly|cytoplasm|actin filament|actin filament organization|cytoskeletal adaptor activity|protein localization|unidimensional cell growth|regulation of lamellipodium assembly|myoblast migration involved in skeletal muscle regeneration|skeletal muscle fiber development|cytoskeleton-dependent cytokinesis
BIRC2	856.252	211.757	1500.75	7.08952	2.82569	1.25811e-144	6.51774e-143	Up	8.18359	8.01868	8.48697	1.16796	1.0085	1.11329	GeneID:101119930	baculoviral IAP repeat containing 2			oas01524,oas04064,oas04120,oas04210,oas04215,oas04217,oas04510,oas04621,oas04668,oas05145,oas05168,oas05200,oas05222	Platinum drug resistance|NF-kappa B signaling pathway|Ubiquitin mediated proteolysis|Apoptosis|Apoptosis - multiple species|Necroptosis|Focal adhesion|NOD-like receptor signaling pathway|TNF signaling pathway|Toxoplasmosis|Herpes simplex virus 1 infection|Pathways in cancer|Small cell lung cancer
BIRC3	339.465	63.1472	615.783	9.75952	3.28681	2.30781e-75	3.46122e-74	Up	3.26467	3.51791	3.572	0.410174	0.239463	0.35294	GeneID:101120189	baculoviral IAP repeat containing 3			oas01524,oas04064,oas04120,oas04210,oas04215,oas04217,oas04510,oas04621,oas04668,oas05145,oas05168,oas05200,oas05222	Platinum drug resistance|NF-kappa B signaling pathway|Ubiquitin mediated proteolysis|Apoptosis|Apoptosis - multiple species|Necroptosis|Focal adhesion|NOD-like receptor signaling pathway|TNF signaling pathway|Toxoplasmosis|Herpes simplex virus 1 infection|Pathways in cancer|Small cell lung cancer
BIRC6	3690.19	1034.62	6345.76	6.13541	2.61716	4.0029e-116	1.24151e-114	Up	11.3398	10.7304	10.7446	1.70655	1.37712	1.95905	GeneID:101103635	baculoviral IAP repeat containing 6			oas04120,oas04215	Ubiquitin mediated proteolysis|Apoptosis - multiple species
BIVM	957.006	434.343	1479.67	3.40516	1.76772	2.52458e-64	2.9387e-63	Up	11.0575	10.4474	10.8679	3.09316	3.28559	2.61181	GeneID:106990123	basic, immunoglobulin-like variable motif containing	GO:0005615,GO:0005634,GO:0005737	extracellular space|nucleus|cytoplasm
BLM	191.749	101.403	282.094	2.78248	1.47637	4.90225e-14	1.12772e-13	Up	1.56543	1.70384	1.72971	0.692722	0.43888	0.566242	GeneID:101107310	BLM RecQ like helicase			oas03440,oas03460	Homologous recombination|Fanconi anemia pathway
BLOC1S2	260.126	151.489	368.763	2.43411	1.28339	6.4756e-17	1.65225e-16	Up	11.5433	10.6807	11.1381	4.66928	4.14606	4.13878	GeneID:101121559	biogenesis of lysosomal organelles complex 1 subunit 2	GO:0000930,GO:0005634,GO:0005737,GO:0005739,GO:0005765,GO:0005813,GO:0008022,GO:0008089,GO:0008625,GO:0016197,GO:0031083,GO:0031175,GO:0032418,GO:0043015,GO:0045944,GO:0048490,GO:0055037,GO:0097345,GO:0099078,GO:1904115	gamma-tubulin complex|nucleus|cytoplasm|mitochondrion|lysosomal membrane|centrosome|protein C-terminus binding|anterograde axonal transport|extrinsic apoptotic signaling pathway via death domain receptors|endosomal transport|BLOC-1 complex|neuron projection development|lysosome localization|gamma-tubulin binding|positive regulation of transcription by RNA polymerase II|anterograde synaptic vesicl…
BLOC1S6	804.976	139.811	1470.14	10.5172	3.39468	8.21421e-16	2.01842e-15	Up	11.3477	11.5846	11.4451	1.38232	0.492338	1.20888	GeneID:101113763	biogenesis of lysosomal organelles complex 1 subunit 6	GO:0005737,GO:0005768,GO:0007596,GO:0008089,GO:0019898,GO:0030133,GO:0030318,GO:0031083,GO:0031175,GO:0032402,GO:0032816,GO:0033299,GO:0035646,GO:0042803,GO:0048490,GO:0050942,GO:0051015,GO:0061025,GO:1904115	cytoplasm|endosome|blood coagulation|anterograde axonal transport|extrinsic component of membrane|transport vesicle|melanocyte differentiation|BLOC-1 complex|neuron projection development|melanosome transport|positive regulation of natural killer cell activation|secretion of lysosomal enzymes|endosome to melanosome transport|protein homodimerization activity|anterograde synaptic vesicle transport…
BLVRB	2516	3422.27	1609.72	0.470415	-1.08799	3.15878e-26	1.11464e-25	Down	49.9609	51.9836	50.8108	92.129	98.4885	115.48	GeneID:101119750	biliverdin reductase B	GO:0004074,GO:0005654,GO:0005829,GO:0005886,GO:0042167,GO:0042602	biliverdin reductase activity|nucleoplasm|cytosol|plasma membrane|heme catabolic process|riboflavin reductase (NADPH) activity	oas00740,oas00860	Riboflavin metabolism|Porphyrin and chlorophyll metabolism
BLZF1	1396.84	310.22	2483.46	8.00506	3.00091	3.90849e-106	1.01241e-104	Up	22.7563	24.6621	25.9513	3.69532	2.23146	2.73928	GeneID:101122875	basic leucine zipper nuclear factor 1	GO:0000139,GO:0001558,GO:0003677,GO:0003700,GO:0005634,GO:0005737,GO:0005794,GO:0006357,GO:0007030,GO:0008283,GO:0019899,GO:0031625,GO:0043001	Golgi membrane|regulation of cell growth|DNA binding|DNA-binding transcription factor activity|nucleus|cytoplasm|Golgi apparatus|regulation of transcription by RNA polymerase II|Golgi organization|cell proliferation|enzyme binding|ubiquitin protein ligase binding|Golgi to plasma membrane protein transport
BMI1	418.381	172.805	663.958	3.84106	1.9415	1.0091e-41	5.99902e-41	Up	5.51929	5.21611	6.0592	1.62154	1.26069	1.25194	GeneID:101103337	BMI1 proto-oncogene, polycomb ring finger	GO:0000122,GO:0000151,GO:0000792,GO:0000978,GO:0001701,GO:0005737,GO:0006306,GO:0006342,GO:0006959,GO:0007420,GO:0008270,GO:0016573,GO:0016604,GO:0021903,GO:0030890,GO:0031519,GO:0033092,GO:0035102,GO:0036353,GO:0045814,GO:0048103,GO:0048704,GO:0051443,GO:0097027,GO:1990841,GO:2000011,GO:2001234	negative regulation of transcription by RNA polymerase II|ubiquitin ligase complex|heterochromatin|RNA polymerase II proximal promoter sequence-specific DNA binding|in utero embryonic development|cytoplasm|DNA methylation|chromatin silencing|humoral immune response|brain development|zinc ion binding|histone acetylation|nuclear body|rostrocaudal neural tube patterning|positive regulation of B cell…	oas04550,oas05202,oas05206	Signaling pathways regulating pluripotency of stem cells|Transcriptional misregulation in cancer|MicroRNAs in cancer
BMP2K	2246.11	1095.88	3396.34	3.09901	1.63181	1.54995e-78	2.46857e-77	Up	12.2472	10.861	11.3699	3.41376	3.76293	3.33698	GeneID:101107523	BMP2 inducible kinase	GO:0004674,GO:0005524,GO:0005634,GO:0006468,GO:0016607,GO:0019208,GO:0030100,GO:0030500	protein serine/threonine kinase activity|ATP binding|nucleus|protein phosphorylation|nuclear speck|phosphatase regulator activity|regulation of endocytosis|regulation of bone mineralization	oas05202	Transcriptional misregulation in cancer
BMPER	412.638	235.106	590.169	2.50939	1.32734	4.5187e-21	1.34176e-20	Up	4.55147	5.23209	4.40962	1.70019	2.02565	1.62024	GeneID:101118437	BMP binding endothelial regulator	GO:0001657,GO:0002043,GO:0005615,GO:0010594,GO:0030514,GO:0042118,GO:0048839,GO:0060393,GO:0070374,GO:1903672	ureteric bud development|blood vessel endothelial cell proliferation involved in sprouting angiogenesis|extracellular space|regulation of endothelial cell migration|negative regulation of BMP signaling pathway|endothelial cell activation|inner ear development|regulation of pathway-restricted SMAD protein phosphorylation|positive regulation of ERK1 and ERK2 cascade|positive regulation of sprouting…
BMPR1A	835.265	171.557	1498.97	8.74107	3.12781	5.15018e-94	1.08715e-92	Up	6.99262	7.3358	7.02398	0.966838	0.538098	0.803377	GeneID:101112282	bone morphogenetic protein receptor type 1A	GO:0000981,GO:0001701,GO:0001707,GO:0001756,GO:0001880,GO:0002053,GO:0002062,GO:0003148,GO:0003151,GO:0003161,GO:0003183,GO:0003186,GO:0003203,GO:0003215,GO:0003222,GO:0003223,GO:0003272,GO:0004674,GO:0004675,GO:0005024,GO:0005025,GO:0005524,GO:0005886,GO:0005887,GO:0006468,GO:0006955,GO:0007179,GO:0007389,GO:0007398,GO:0009897,GO:0009950,GO:0010862,GO:0014032,GO:0014912,GO:0016021,GO:0019827,GO:…	DNA-binding transcription factor activity, RNA polymerase II-specific|in utero embryonic development|mesoderm formation|somitogenesis|Mullerian duct regression|positive regulation of mesenchymal cell proliferation|chondrocyte differentiation|outflow tract septum morphogenesis|outflow tract morphogenesis|cardiac conduction system development|mitral valve morphogenesis|tricuspid valve morphogenesis…	oas04060,oas04350,oas04390,oas04550,oas05418	Cytokine-cytokine receptor interaction|TGF-beta signaling pathway|Hippo signaling pathway|Signaling pathways regulating pluripotency of stem cells|Fluid shear stress and atherosclerosis
BMPR1B	676.944	280.861	1073.03	3.81878	1.93311	1.02348e-60	1.08835e-59	Up	3.99891	4.19408	3.89115	0.972263	1.12987	0.889258	GeneID:443454	bone morphogenetic protein receptor type 1B	GO:0001501,GO:0001502,GO:0001550,GO:0001654,GO:0002063,GO:0004674,GO:0004675,GO:0005024,GO:0005025,GO:0005524,GO:0005886,GO:0005887,GO:0006468,GO:0006954,GO:0007179,GO:0007389,GO:0009953,GO:0019838,GO:0030166,GO:0030425,GO:0030501,GO:0030509,GO:0031290,GO:0032332,GO:0035108,GO:0042698,GO:0043025,GO:0043235,GO:0045597,GO:0045669,GO:0045944,GO:0046332,GO:0046872,GO:0060041,GO:0060350,GO:0061036,GO:…	skeletal system development|cartilage condensation|ovarian cumulus expansion|eye development|chondrocyte development|protein serine/threonine kinase activity|transmembrane receptor protein serine/threonine kinase activity|transforming growth factor beta-activated receptor activity|transforming growth factor beta receptor activity, type I|ATP binding|plasma membrane|integral component of plasma me…	oas04060,oas04350,oas04360,oas04390,oas04550,oas05418	Cytokine-cytokine receptor interaction|TGF-beta signaling pathway|Axon guidance|Hippo signaling pathway|Signaling pathways regulating pluripotency of stem cells|Fluid shear stress and atherosclerosis
BMPR2	1177.62	233.546	2121.69	9.09163	3.18454	1.93373e-164	1.38826e-162	Up	19.1853	17.6726	16.7174	1.91184	1.61888	2.03386	GeneID:101103793	bone morphogenetic protein receptor type 2	GO:0001707,GO:0001893,GO:0001935,GO:0001938,GO:0001946,GO:0001974,GO:0002063,GO:0003085,GO:0003148,GO:0003151,GO:0003183,GO:0003186,GO:0003197,GO:0003252,GO:0005024,GO:0005026,GO:0005524,GO:0005615,GO:0005654,GO:0005737,GO:0005886,GO:0005887,GO:0005901,GO:0005913,GO:0006366,GO:0007178,GO:0007179,GO:0007389,GO:0007420,GO:0009267,GO:0009925,GO:0009952,GO:0009986,GO:0010595,GO:0010634,GO:0010862,GO:…	mesoderm formation|maternal placenta development|endothelial cell proliferation|positive regulation of endothelial cell proliferation|lymphangiogenesis|blood vessel remodeling|chondrocyte development|negative regulation of systemic arterial blood pressure|outflow tract septum morphogenesis|outflow tract morphogenesis|mitral valve morphogenesis|tricuspid valve morphogenesis|endocardial cushion dev…	oas04060,oas04350,oas04360,oas04390,oas04550,oas05206,oas05418	Cytokine-cytokine receptor interaction|TGF-beta signaling pathway|Axon guidance|Hippo signaling pathway|Signaling pathways regulating pluripotency of stem cells|MicroRNAs in cancer|Fluid shear stress and atherosclerosis
BMS1	2338.59	1264.16	3413.01	2.7002	1.43306	3.23499e-67	4.06689e-66	Up	20.2917	21.5959	20.6906	7.55842	6.83516	7.4911	GeneID:101117987	BMS1 ribosome biogenesis factor	GO:0000462,GO:0003723,GO:0003924,GO:0005524,GO:0005525,GO:0005634,GO:0005654,GO:0005730,GO:0006364,GO:0030686,GO:0034511	maturation of SSU-rRNA from tricistronic rRNA transcript (SSU-rRNA, 5.8S rRNA, LSU-rRNA)|RNA binding|GTPase activity|ATP binding|GTP binding|nucleus|nucleoplasm|nucleolus|rRNA processing|90S preribosome|U3 snoRNA binding	oas03008	Ribosome biogenesis in eukaryotes
BMT2	514.408	115.182	913.634	7.9316	2.98761	4.30917e-72	6.05811e-71	Up	6.51253	5.9871	6.9099	1.0165	0.565615	0.732084	GeneID:101111794	base methyltransferase of 25S rRNA 2 homolog	GO:0005730,GO:0016433,GO:0034198,GO:1904047,GO:1904262	nucleolus|rRNA (adenine) methyltransferase activity|cellular response to amino acid starvation|S-adenosyl-L-methionine binding|negative regulation of TORC1 signaling
BNC2	5782.57	2037.17	9527.96	4.67667	2.22548	4.69313e-143	2.35372e-141	Up	21.7522	20.0618	19.8328	3.96109	4.68062	3.81994	GeneID:101122574	basonuclin 2	GO:0003416,GO:0003677,GO:0005634,GO:0005654,GO:0043586,GO:0046872,GO:0060021,GO:0060485	endochondral bone growth|DNA binding|nucleus|nucleoplasm|tongue development|metal ion binding|roof of mouth development|mesenchyme development
BNIP2	1213.31	251.505	2175.11	8.648	3.11237	2.06072e-135	8.83174e-134	Up	8.6416	9.10068	8.53062	1.18257	0.774214	0.915907	GeneID:101103240	BCL2 interacting protein 2
BNIP3	8523.12	12017.1	5029.15	0.418512	-1.25666	2.1301e-57	2.02596e-56	Down	78.855	84.7445	82.9187	176.455	182.252	197.033	GeneID:101108441	BCL2 interacting protein 3	GO:0005635,GO:0005739,GO:0005741,GO:0005783,GO:0016021,GO:0035694,GO:0043065,GO:0043068,GO:0097345	nuclear envelope|mitochondrion|mitochondrial outer membrane|endoplasmic reticulum|integral component of membrane|mitochondrial protein catabolic process|positive regulation of apoptotic process|positive regulation of programmed cell death|mitochondrial outer membrane permeabilization	oas04068,oas04137,oas04140,oas05134	FoxO signaling pathway|Mitophagy - animal|Autophagy - animal|Legionellosis
BNIP3L	3078.43	1508.78	4648.08	3.08134	1.62356	6.04655e-66	7.3721e-65	Up	27.9356	26.6527	28.4916	8.59792	7.5374	9.30164	GeneID:101110026	BCL2 interacting protein 3 like	GO:0005521,GO:0005635,GO:0005739,GO:0005741,GO:0005783,GO:0016021,GO:0016239,GO:0016607,GO:0035694,GO:0042803,GO:0043065,GO:0043066,GO:0046982,GO:0051607,GO:0071456,GO:0097345,GO:1903146,GO:1903214	lamin binding|nuclear envelope|mitochondrion|mitochondrial outer membrane|endoplasmic reticulum|integral component of membrane|positive regulation of macroautophagy|nuclear speck|mitochondrial protein catabolic process|protein homodimerization activity|positive regulation of apoptotic process|negative regulation of apoptotic process|protein heterodimerization activity|defense response to virus|ce…	oas04137	Mitophagy - animal
BNIPL	91.9362	12.5387	171.334	13.6602	3.77191	2.74721e-31	1.15912e-30	Up	2.34596	2.01193	2.05744	0.128857	0.173946	0.140815	GeneID:101110283	BCL2 interacting protein like	GO:0004309,GO:0005634,GO:0005737,GO:0005829,GO:0006798,GO:0006915,GO:0008285,GO:0040009,GO:0042802	exopolyphosphatase activity|nucleus|cytoplasm|cytosol|polyphosphate catabolic process|apoptotic process|negative regulation of cell proliferation|regulation of growth rate|identical protein binding
BOD1L1	1099.5	584.887	1614.11	2.76032	1.46484	1.44212e-33	6.52877e-33	Up	4.92264	4.16375	3.81655	1.51842	1.32732	1.56866	GeneID:101115795	biorientation of chromosomes in cell division 1 like 1	GO:0005654,GO:0005694,GO:0006281,GO:0006974,GO:0031297	nucleoplasm|chromosome|DNA repair|cellular response to DNA damage stimulus|replication fork processing
BOK	784.239	1102.8	465.68	0.422366	-1.24343	3.85959e-26	1.35652e-25	Down	8.02537	8.58791	8.35761	17.2238	17.8474	20.6809	GeneID:101122750	BCL2 family apoptosis regulator BOK
BOLA2B	1438.22	2012.85	863.597	0.429093	-1.22064	2.72684e-31	1.15121e-30	Down	24.8935	28.4715	26.4564	59.2317	52.7978	63.4754	GeneID:101114744	bolA family member 2B	GO:0000981,GO:0005634,GO:0005737,GO:0005829,GO:0035722,GO:0044571,GO:0097428	DNA-binding transcription factor activity, RNA polymerase II-specific|nucleus|cytoplasm|cytosol|interleukin-12-mediated signaling pathway|[2Fe-2S] cluster assembly|protein maturation by iron-sulfur cluster transfer
BOP1	1902.34	2849.75	954.935	0.335113	-1.57728	1.31134e-56	1.21854e-55	Down	7.31481	8.00283	7.34269	19.0828	22.2266	22.4915	GeneID:101109624	BOP1 ribosomal biogenesis factor
BORA	379.788	125.939	633.638	5.03442	2.33182	1.16107e-60	1.23004e-59	Up	7.08561	7.51195	7.69466	1.4083	1.30699	1.46585	GeneID:101122704	BORA aurora kinase A activator	GO:0000086,GO:0005829,GO:0007088,GO:0019901,GO:0032880,GO:0051301,GO:0060236	G2/M transition of mitotic cell cycle|cytosol|regulation of mitotic nuclear division|protein kinase binding|regulation of protein localization|cell division|regulation of mitotic spindle organization
BORCS5	424.595	601.469	247.721	0.411823	-1.2799	1.52121e-24	5.07655e-24	Down	4.47155	4.89454	4.75262	11.1941	11.0462	10.16	GeneID:101112472	BLOC-1 related complex subunit 5	GO:0005873,GO:0031224,GO:0032418,GO:0072384,GO:0098574,GO:0099078	plus-end kinesin complex|intrinsic component of membrane|lysosome localization|organelle transport along microtubule|cytoplasmic side of lysosomal membrane|BORC complex
BORCS6	246.066	367.113	125.018	0.340673	-1.55354	1.63277e-18	4.42295e-18	Down	0.771374	0.63179	0.685821	1.80345	1.78013	2.19932	GeneID:101106602	BLOC-1 related complex subunit 6	GO:0005765,GO:0032418,GO:0099078	lysosomal membrane|lysosome localization|BORC complex
BORCS8	991.876	1381.06	602.696	0.43647	-1.19605	1.05822e-27	3.90973e-27	Down	5.62671	5.76034	5.25516	11.3504	11.4585	13.1613	GeneID:101106256	BLOC-1 related complex subunit 8	GO:0005765,GO:0007507,GO:0099078	lysosomal membrane|heart development|BORC complex
BPNT1	755.786	447.221	1064.35	2.37847	1.25004	1.05254e-19	2.98199e-19	Up	17.9091	17.4237	17.274	8.0395	7.74432	5.17279	GeneID:101104841	3'(2'), 5'-bisphosphate nucleotidase 1	GO:0008441,GO:0046854,GO:0046872	3'(2'),5'-bisphosphate nucleotidase activity|phosphatidylinositol phosphorylation|metal ion binding	oas00920	Sulfur metabolism
BPTF	1819.88	736.041	2903.71	3.94601	1.98039	4.79266e-101	1.1316e-99	Up	6.981	6.28514	6.33723	1.58821	1.46978	1.63328	GeneID:101102998	bromodomain PHD finger transcription factor	GO:0000122,GO:0000790,GO:0001892,GO:0005634,GO:0005654,GO:0005737,GO:0006338,GO:0006357,GO:0007420,GO:0007492,GO:0008134,GO:0009952,GO:0016589,GO:0035064,GO:0043565,GO:0045944,GO:0046872,GO:0070062	negative regulation of transcription by RNA polymerase II|nuclear chromatin|embryonic placenta development|nucleus|nucleoplasm|cytoplasm|chromatin remodeling|regulation of transcription by RNA polymerase II|brain development|endoderm development|transcription factor binding|anterior/posterior pattern specification|NURF complex|methylated histone binding|sequence-specific DNA binding|positive regu…
BRAF	437.815	180.753	694.877	3.84588	1.94331	4.27886e-50	3.31231e-49	Up	2.03196	1.94435	1.98013	0.45313	0.504309	0.504948	GeneID:101107438	B-Raf proto-oncogene, serine/threonine kinase			oas01521,oas01522,oas04010,oas04012,oas04015,oas04024,oas04062,oas04068,oas04150,oas04270,oas04510,oas04650,oas04720,oas04722,oas04726,oas04730,oas04810,oas04910,oas04914,oas04928,oas04934,oas05034,oas05160,oas05161,oas05200,oas05205,oas05210,oas05211,oas05212,oas05213,oas05214,oas05215,oas05216,oas05218,oas05219,oas05220,oas05221,oas05223,oas05224,oas05225,oas05226	EGFR tyrosine kinase inhibitor resistance|Endocrine resistance|MAPK signaling pathway|ErbB signaling pathway|Rap1 signaling pathway|cAMP signaling pathway|Chemokine signaling pathway|FoxO signaling pathway|mTOR signaling pathway|Vascular smooth muscle contraction|Focal adhesion|Natural killer cell mediated cytotoxicity|Long-term potentiation|Neurotrophin signaling pathway|Serotonergic synapse|Lon…
BRAT1	820.96	1125.38	516.536	0.459038	-1.12332	8.88321e-28	3.29233e-27	Down	3.8734	3.74562	4.09833	7.65479	8.31516	8.13	GeneID:101111600	BRCA1 associated ATM activator 1	GO:0001934,GO:0005634,GO:0005654,GO:0005737,GO:0006006,GO:0006915,GO:0006974,GO:0008283,GO:0010212,GO:0016477,GO:0030307,GO:0051646	positive regulation of protein phosphorylation|nucleus|nucleoplasm|cytoplasm|glucose metabolic process|apoptotic process|cellular response to DNA damage stimulus|cell proliferation|response to ionizing radiation|cell migration|positive regulation of cell growth|mitochondrion localization
BRCA1	883.594	248.998	1518.19	6.10291	2.6095	1.1936e-63	1.36468e-62	Up	5.07592	5.11932	5.51645	0.857644	0.573484	0.995296	GeneID:101108584	BRCA1 DNA repair associated	GO:0000724,GO:0003677,GO:0003713,GO:0004842,GO:0005634,GO:0005694,GO:0005737,GO:0005886,GO:0006357,GO:0006633,GO:0007049,GO:0008270,GO:0009048,GO:0031436,GO:0035066,GO:0035067,GO:0043009,GO:0045717,GO:0045893,GO:0045944,GO:0051865,GO:0070063,GO:0070531,GO:0071158,GO:0085020	double-strand break repair via homologous recombination|DNA binding|transcription coactivator activity|ubiquitin-protein transferase activity|nucleus|chromosome|cytoplasm|plasma membrane|regulation of transcription by RNA polymerase II|fatty acid biosynthetic process|cell cycle|zinc ion binding|dosage compensation by inactivation of X chromosome|BRCA1-BARD1 complex|positive regulation of histone …	oas01524,oas03440,oas03460,oas04120,oas04151,oas05206,oas05224	Platinum drug resistance|Homologous recombination|Fanconi anemia pathway|Ubiquitin mediated proteolysis|PI3K-Akt signaling pathway|MicroRNAs in cancer|Breast cancer
BRCA2	377.93	43.9357	711.923	16.219	4.01961	5.01776e-15	1.19754e-14	Up	1.86846	1.76769	1.5751	0.116805	0.0385433	0.146834	GeneID:101109980	BRCA2 DNA repair associated			oas03440,oas03460,oas05200,oas05212,oas05224	Homologous recombination|Fanconi anemia pathway|Pathways in cancer|Pancreatic cancer|Breast cancer
BRCC3	1013.94	256.144	1771.74	6.92009	2.79079	1.37069e-137	6.21335e-136	Up	16.4017	16.8913	16.7916	2.51099	1.95181	2.37363	GeneID:101114756	BRCA1/BRCA2-containing complex subunit 3	GO:0000922,GO:0004843,GO:0005634,GO:0005737,GO:0006281,GO:0006302,GO:0007049,GO:0008237,GO:0010212,GO:0031593,GO:0036459,GO:0045739,GO:0046872,GO:0051301,GO:0070531,GO:0070536,GO:0070537,GO:0070552,GO:0072425	spindle pole|thiol-dependent ubiquitin-specific protease activity|nucleus|cytoplasm|DNA repair|double-strand break repair|cell cycle|metallopeptidase activity|response to ionizing radiation|polyubiquitin modification-dependent protein binding|thiol-dependent ubiquitinyl hydrolase activity|positive regulation of DNA repair|metal ion binding|cell division|BRCA1-A complex|protein K63-linked deubiqui…	oas03440,oas04621	Homologous recombination|NOD-like receptor signaling pathway
BRD3OS	629.338	898.409	360.267	0.401067	-1.31808	1.71116e-25	5.88688e-25	Down	5.50777	5.48195	4.76168	12.2155	11.3207	13.5248	GeneID:105607210	BRD3 opposite strand
BRD8	1843.87	1209.18	2478.56	2.04951	1.03528	1.63004e-35	7.89778e-35	Up	15.6719	15.5694	15.5692	7.84489	7.11683	6.63357	GeneID:101108568	bromodomain containing 8	GO:0000812,GO:0003700,GO:0004887,GO:0005634,GO:0005654,GO:0005739,GO:0006355,GO:0006357,GO:0007165,GO:0007166,GO:0035267,GO:0040008,GO:0043967,GO:0043968,GO:0045944	Swr1 complex|DNA-binding transcription factor activity|thyroid hormone receptor activity|nucleus|nucleoplasm|mitochondrion|regulation of transcription, DNA-templated|regulation of transcription by RNA polymerase II|signal transduction|cell surface receptor signaling pathway|NuA4 histone acetyltransferase complex|regulation of growth|histone H4 acetylation|histone H2A acetylation|positive regulati…
BRF1	2151.25	2985.28	1317.21	0.441266	-1.18028	8.60645e-35	4.08049e-34	Down	7.11578	6.59108	7.12197	13.334	15.5988	15.6064	GeneID:101106207	BRF1 RNA polymerase III transcription initiation factor subunit	GO:0000126,GO:0000995,GO:0005654,GO:0006383,GO:0006384,GO:0009303,GO:0009304,GO:0017025,GO:0045945,GO:0046872,GO:0070897	transcription factor TFIIIB complex|RNA polymerase III general transcription initiation factor activity|nucleoplasm|transcription by RNA polymerase III|transcription initiation from RNA polymerase III promoter|rRNA transcription|tRNA transcription|TBP-class protein binding|positive regulation of transcription by RNA polymerase III|metal ion binding|transcription preinitiation complex assembly
BRI3	1707.55	2339.99	1075.11	0.45952	-1.1218	3.71772e-26	1.3073e-25	Down	38.024	36.835	39.5421	74.2467	72.017	88.4438	GeneID:101104367	brain protein I3	GO:0005765,GO:0016021	lysosomal membrane|integral component of membrane
BRIP1	91.4951	20.6675	162.323	7.83567	2.97006	1.13143e-14	2.66476e-14	Up	0.753021	0.998153	1.12505	0.227065	0.0548243	0.0665733	GeneID:101107879	BRCA1 interacting protein C-terminal helicase 1			oas03440,oas03460	Homologous recombination|Fanconi anemia pathway
BRIX1	540.757	264.262	817.253	3.09305	1.62903	3.49127e-28	1.31742e-27	Up	17.0011	17.5638	17.3391	6.45585	4.09016	5.31293	GeneID:101112163	biogenesis of ribosomes BRX1	GO:0000027,GO:0005730	ribosomal large subunit assembly|nucleolus
BRMS1	1303.25	1861.07	745.43	0.400571	-1.31987	2.96316e-41	1.73748e-40	Down	13.7044	11.5181	12.7945	30.3753	28.6956	30.5558	GeneID:100307034	BRMS1 transcriptional repressor and anoikis regulator
BRMS1L	578.169	250.835	905.503	3.60975	1.8519	1.5823e-57	1.51104e-56	Up	9.48071	9.00349	9.48617	2.6279	2.35279	2.34212	GeneID:101120698	BRMS1 like transcriptional repressor	GO:0000122,GO:0016575,GO:0040008,GO:0042826,GO:0070822	negative regulation of transcription by RNA polymerase II|histone deacetylation|regulation of growth|histone deacetylase binding|Sin3-type complex
BROX	961.461	187.328	1735.59	9.27252	3.21296	4.77479e-112	1.367e-110	Up	9.57473	10.4361	9.46508	1.15276	0.725714	1.12283	GeneID:101107116	BRO1 domain and CAAX motif containing	GO:0016020,GO:0070062	membrane|extracellular exosome
BRSK1	208.819	288.932	128.707	0.445425	-1.16674	3.82765e-11	7.9225e-11	Down	1.27894	1.31459	1.04954	2.79876	2.38482	2.54632	GeneID:101121543	BR serine/threonine kinase 1	GO:0000287,GO:0004674,GO:0005524,GO:0005634,GO:0005654,GO:0005737,GO:0005813,GO:0006468,GO:0006974,GO:0007095,GO:0007269,GO:0007409,GO:0008021,GO:0008306,GO:0009411,GO:0010975,GO:0019901,GO:0030010,GO:0030054,GO:0030182,GO:0035556,GO:0043015,GO:0048167,GO:0048786,GO:0050321,GO:0050770,GO:0051298,GO:0090176,GO:0099504,GO:0150034,GO:2000807	magnesium ion binding|protein serine/threonine kinase activity|ATP binding|nucleus|nucleoplasm|cytoplasm|centrosome|protein phosphorylation|cellular response to DNA damage stimulus|mitotic G2 DNA damage checkpoint|neurotransmitter secretion|axonogenesis|synaptic vesicle|associative learning|response to UV|regulation of neuron projection development|protein kinase binding|establishment of cell pol…
BRWD1	1152.81	188.676	2116.93	11.2245	3.48858	7.53594e-188	8.52647e-186	Up	6.4488	5.48016	5.52365	0.523612	0.44174	0.503849	GeneID:101117901	bromodomain and WD repeat domain containing 1	GO:0005634,GO:0005654,GO:0005730,GO:0005829,GO:0006325,GO:0006357,GO:0007010,GO:0008360,GO:0038111	nucleus|nucleoplasm|nucleolus|cytosol|chromatin organization|regulation of transcription by RNA polymerase II|cytoskeleton organization|regulation of cell shape|interleukin-7-mediated signaling pathway
BRWD3	584.679	78.3419	1091.02	13.9386	3.80101	2.21575e-161	1.49939e-159	Up	2.86056	2.83516	2.96604	0.186226	0.194184	0.206448	GeneID:101120385	bromodomain and WD repeat domain containing 3
BST1	1726.35	1117.59	2335.11	2.08884	1.06271	5.17353e-22	1.5865e-21	Up	27.7626	28.2774	29.5791	13.4393	14.9273	10.4301	GeneID:101116575	bone marrow stromal cell antigen 1	GO:0003953,GO:0005886,GO:0016740,GO:0016849,GO:0030890,GO:0031225,GO:0050135,GO:0061809	NAD+ nucleosidase activity|plasma membrane|transferase activity|phosphorus-oxygen lyase activity|positive regulation of B cell proliferation|anchored component of membrane|NAD(P)+ nucleosidase activity|NAD+ nucleotidase, cyclic ADP-ribose generating	oas00760,oas04970,oas04972	Nicotinate and nicotinamide metabolism|Salivary secretion|Pancreatic secretion
BTAF1	1194.27	214.528	2174.01	10.1485	3.34319	1.25519e-143	6.40872e-142	Up	8.29049	8.05319	7.98505	0.703594	0.623743	0.93274	GeneID:101101938	B-TFIID TATA-box binding protein associated factor 1	GO:0003677,GO:0003700,GO:0004386,GO:0005524,GO:0005654,GO:0035562,GO:0043231,GO:0045892	DNA binding|DNA-binding transcription factor activity|helicase activity|ATP binding|nucleoplasm|negative regulation of chromatin binding|intracellular membrane-bounded organelle|negative regulation of transcription, DNA-templated
BTBD1	938.435	539.733	1337.14	2.47651	1.30831	1.24242e-32	5.4587e-32	Up	10.2474	11.4906	11.1742	4.73406	4.2292	3.60875	GeneID:101106630	BTB domain containing 1	GO:0000932,GO:0005829,GO:0007517,GO:0016567,GO:0022008,GO:0032991,GO:0043393,GO:0043687	P-body|cytosol|muscle organ development|protein ubiquitination|neurogenesis|protein-containing complex|regulation of protein binding|post-translational protein modification
BTBD2	3680.06	5080.28	2279.84	0.448788	-1.15589	4.1625e-44	2.69799e-43	Down	24.6951	27.0955	25.7686	52.1255	53.4126	57.5345	GeneID:101118022	BTB domain containing 2	GO:0000932,GO:0005829,GO:0022008	P-body|cytosol|neurogenesis
BTBD6	2065.99	2845.33	1286.66	0.452258	-1.14478	5.40543e-33	2.40557e-32	Down	17.0167	17.336	18.9597	35.0489	35.8121	40.3145	GeneID:101106971	BTB domain containing 6	GO:0005829,GO:0022008,GO:0043687	cytosol|neurogenesis|post-translational protein modification
BTBD7	1072.84	530.613	1615.07	3.04303	1.60551	1.96248e-58	1.93148e-57	Up	5.12152	4.75173	4.76311	1.5025	1.65856	1.38583	GeneID:101115910	BTB domain containing 7	GO:0005634,GO:0007275,GO:0060693	nucleus|multicellular organism development|regulation of branching involved in salivary gland morphogenesis
BTG3	885.109	464.994	1305.22	2.80621	1.48862	3.09236e-30	1.25784e-29	Up	25.8963	27.9067	29.3682	11.6369	8.32422	8.0841	GeneID:100620049	BTG anti-proliferation factor 3	GO:0005634,GO:0005737,GO:0008285,GO:0045930	nucleus|cytoplasm|negative regulation of cell proliferation|negative regulation of mitotic cell cycle	oas03018	RNA degradation
BUB1B	1129.35	609.41	1649.29	2.7068	1.43659	1.38696e-56	1.28712e-55	Up	11.7584	12.1409	12.3931	4.30126	4.1081	4.25357	GeneID:101108313	BUB1 mitotic checkpoint serine/threonine kinase B			oas04110,oas05166	Cell cycle|Human T-cell leukemia virus 1 infection
BUD23	2108.53	2816.16	1400.91	0.497505	-1.00722	2.53408e-29	9.97203e-29	Down	31.5065	34.3019	34.4931	60.7012	61.9744	67.5354	GeneID:101112944	BUD23 rRNA methyltransferase and ribosome maturation factor	GO:0005654,GO:0005730,GO:0006325,GO:0016435,GO:0046982,GO:0048471,GO:0070476,GO:2000234	nucleoplasm|nucleolus|chromatin organization|rRNA (guanine) methyltransferase activity|protein heterodimerization activity|perinuclear region of cytoplasm|rRNA (guanine-N7)-methylation|positive regulation of rRNA processing
BUD31	3136.29	4207.46	2065.11	0.490852	-1.02664	6.50927e-39	3.5151e-38	Down	43.9467	42.2528	43.0372	83.0946	79.158	86.2978	GeneID:101105991	BUD31 homolog	GO:0000398,GO:0003700,GO:0005634,GO:0005654,GO:0005681,GO:0006357,GO:0030374,GO:0035257,GO:0071007,GO:2000825	mRNA splicing, via spliceosome|DNA-binding transcription factor activity|nucleus|nucleoplasm|spliceosomal complex|regulation of transcription by RNA polymerase II|nuclear receptor transcription coactivator activity|nuclear hormone receptor binding|U2-type catalytic step 2 spliceosome|positive regulation of androgen receptor activity	oas03040	Spliceosome
BYSL	1936.47	2998.99	873.94	0.29144	-1.77873	5.23179e-91	1.0451e-89	Down	8.79202	9.10914	10.1197	30.1072	29.6454	31.003	GeneID:101107825	bystin like	GO:0000462,GO:0001829,GO:0005634,GO:0005730,GO:0005737,GO:0006364,GO:0008283,GO:0030515,GO:0030688,GO:0045177	maturation of SSU-rRNA from tricistronic rRNA transcript (SSU-rRNA, 5.8S rRNA, LSU-rRNA)|trophectodermal cell differentiation|nucleus|nucleolus|cytoplasm|rRNA processing|cell proliferation|snoRNA binding|preribosome, small subunit precursor|apical part of cell
BZW1	8938.56	3377.25	14499.9	4.29332	2.1021	6.30018e-60	6.48496e-59	Up	65.8601	68.5303	68.3131	19.2643	11.6864	13.7178	GeneID:101105056	basic leucine zipper and W2 domains 1	GO:0005737	cytoplasm
C11H17orf49	1671.03	2363.84	978.221	0.413889	-1.27268	1.07513e-30	4.44479e-30	Down	29.3503	29.9831	31.3956	67.4683	60.7881	78.3944	GeneID:101114201	chromosome 11 C17orf49 homolog	GO:0003677,GO:0006325,GO:0016589,GO:0071339	DNA binding|chromatin organization|NURF complex|MLL1 complex
C11H17orf53	126.792	198.081	55.5033	0.280367	-1.83461	7.69359e-13	1.69539e-12	Down	0.430872	0.473706	0.78456	1.62564	2.00454	2.04748	GeneID:101115140	chromosome 11 C17orf53 homolog
C11H17orf75	398.814	262.754	534.873	2.03488	1.02494	1.93141e-14	4.5098e-14	Up	4.32298	4.11858	3.90398	1.89906	2.12299	1.71429	GeneID:101115384	chromosome 11 C17orf75 homolog	GO:0005802,GO:0006886,GO:0031410,GO:0099041	trans-Golgi network|intracellular protein transport|cytoplasmic vesicle|vesicle tethering to Golgi
C12H1orf112	233.714	119.015	348.413	2.92885	1.55033	2.38642e-15	5.75662e-15	Up	2.09464	2.80137	3.30968	0.831711	0.874344	0.936376	GeneID:101109467	chromosome 12 C1orf112 homolog
C12H1orf53	322.636	476.98	168.293	0.352972	-1.50237	1.34385e-19	3.78985e-19	Down	7.56165	6.00904	7.75821	17.2416	18.1274	21.5993	GeneID:105611350	chromosome 12 C1orf53 homolog
C13H20orf194	752.829	465.917	1039.74	2.23069	1.15749	1.24245e-25	4.29633e-25	Up	4.09849	4.00433	4.24378	1.80494	1.92281	1.50673	GeneID:101112247	chromosome 13 C20orf194 homolog
C13H20orf27	2882.11	3914.24	1849.98	0.472673	-1.08109	6.3825e-35	3.04034e-34	Down	32.5843	32.2087	33.8911	62.896	63.0227	71.027	GeneID:101121189	chromosome 13 C20orf27 homolog
C14H16orf74	41.8153	58.171	25.4595	0.438233	-1.19023	0.00234758	0.00337451	Down	0.652533	0.580615	0.705406	1.02387	1.20214	1.93204	GeneID:106991551	chromosome 14 C16orf74 homolog
C14H19orf18	26.9825	11.9718	41.9931	3.51923	1.81526	0.000119977	0.000186835	Up	0.774636	0.76016	0.872416	0.143401	0.195192	0.305256	GeneID:101111738	chromosome 14 C19orf18 homolog	GO:0016021,GO:0070062	integral component of membrane|extracellular exosome
C14H19orf33	283.7	421.535	145.866	0.346108	-1.5307	9.18627e-23	2.88843e-22	Down	8.47335	9.89152	9.00232	23.7064	24.3972	26.5102	GeneID:101110439	chromosome 14 C19orf33 homolog
C14H19orf48	916.598	1382.11	451.084	0.326434	-1.61513	7.02018e-44	4.51097e-43	Down	3.25111	3.48206	3.56567	10.0602	8.80688	10.8931	GeneID:105616911	chromosome 14 C19orf48 homolog	GO:0005794,GO:0009615,GO:0016032,GO:0051607	Golgi apparatus|response to virus|viral process|defense response to virus
C14H19orf54	501.032	758.968	243.095	0.320316	-1.64243	1.18351e-38	6.33072e-38	Down	1.192	1.46723	1.35499	4.07436	3.80843	3.9521	GeneID:101120771	chromosome 14 C19orf54 homolog
C15H11orf1	31.1893	9.82685	52.5517	5.32774	2.41352	3.7903e-07	6.67824e-07	Up	0.559595	0.474573	0.715927	0.145741	0.113358	0.0521405	GeneID:101109995	chromosome 15 C11orf1 homolog	GO:0005634	nucleus
C15H11orf49	1087.38	1464.43	710.322	0.485128	-1.04356	8.27157e-25	2.78801e-24	Down	9.90002	10.2478	10.9069	20.6172	18.542	21.2556	GeneID:101118987	chromosome 15 C11orf49 homolog
C15H11orf58	1978.98	758.016	3199.94	4.22155	2.07777	6.918e-94	1.45381e-92	Up	29.9082	30.0737	29.7253	7.74268	5.81584	6.52638	GeneID:101115649	chromosome 15 C11orf58 homolog
C15H11orf71	62.8466	86.9852	38.708	0.44512	-1.16773	8.5807e-05	0.000134901	Down	1.92773	1.55963	1.43028	3.33977	3.30616	3.78368	GeneID:101114723	chromosome 15 C11orf71 homolog
C15H11orf74	301.096	164.976	437.216	2.6498	1.40588	1.44762e-19	4.07519e-19	Up	11.3345	9.90003	10.6772	4.40645	3.41283	3.56787	GeneID:101107893	chromosome 15 C11orf74 homolog	GO:0005929	cilium
C15H11orf96	852.925	1272.39	433.459	0.340716	-1.55336	2.12894e-36	1.05983e-35	Down	7.77561	9.2147	10.2132	26.6634	22.5688	26.12	GeneID:101115904	chromosome 15 C11orf96 homolog
C16H5orf22	348.659	86.7993	610.518	7.03306	2.81415	4.31922e-58	4.20708e-57	Up	5.40743	4.81338	5.13665	0.889141	0.521884	0.654219	GeneID:101115572	chromosome 16 C5orf22 homolog
C16H5orf34	165.739	66.5117	264.966	3.98711	1.99534	7.14793e-19	1.96527e-18	Up	2.1083	2.22349	1.98999	0.612013	0.332481	0.553263	GeneID:101122307	chromosome 16 C5orf34 homolog
C16H5orf49	39.659	53.1682	26.1498	0.491282	-1.02538	0.0166099	0.0223707	Down	1.00522	0.802929	0.534204	2.27204	1.33285	0.927253	GeneID:101105949	chromosome 16 C5orf49 homolog
C16H5orf51	1842.49	610.51	3074.47	5.03851	2.333	1.71019e-123	6.18599e-122	Up	14.415	15.124	15.0215	2.63822	2.5982	3.10596	GeneID:101116604	chromosome 16 C5orf51 homolog	GO:0005654,GO:0005829	nucleoplasm|cytosol
C17H12orf49	473.577	666.702	280.453	0.420794	-1.24881	7.74543e-19	2.12541e-18	Down	6.60502	5.84639	6.27658	13.1178	12.8824	15.9654	GeneID:101110621	chromosome 17 C12orf49 homolog	GO:0005576	extracellular region
C17H22orf39	932.434	1339.3	525.574	0.392479	-1.34931	2.31777e-37	1.18869e-36	Down	8.53255	8.02572	7.94776	19.7786	18.28	20.8795	GeneID:105612811	chromosome 17 C22orf39 homolog
C17H4orf33	18.7946	10.1655	27.4236	2.69154	1.42843	0.0122479	0.0166832	Up	0.725638	0.561446	1.03657	0.238308	0.419395	0.159148	GeneID:101119077	chromosome 17 C4orf33 homolog
C17H4orf46	219.256	114.078	324.434	2.8407	1.50625	3.235e-14	7.49429e-14	Up	3.09528	2.62086	2.88765	1.22774	0.9526	0.689726	GeneID:101106969	chromosome 17 C4orf46 homolog	GO:0005737	cytoplasm
C18H15orf39	432.824	766.746	98.9027	0.129008	-2.95447	2.17019e-78	3.44092e-77	Down	0.553664	0.679296	0.592419	3.97139	4.49142	4.88033	GeneID:101106884	chromosome 18 C15orf39 homolog	GO:0005829	cytosol
C19H3orf20	2.97089	0.325046	5.61674	15.829	3.9845	0.0183635	0.0246222	Up	0.0255989	0.051497	0.0685238	0.0080956	0	0	GeneID:101109126	chromosome 19 C3orf20 homolog	GO:0005737,GO:0016021	cytoplasm|integral component of membrane
C19H3orf49	28.6079	2.98877	54.2271	18.2285	4.18813	1.14692e-11	2.42357e-11	Up	0.582843	0.512968	0.616406	0.0197489	0.0293252	0.0395663	GeneID:101119763	chromosome 19 C3orf49 homolog
C19H3orf67	323.833	184.692	462.973	2.50484	1.32472	1.16197e-17	3.04499e-17	Up	3.54689	3.08904	3.48804	1.36108	1.42863	1.03457	GeneID:101107905	chromosome 19 C3orf67 homolog
C19H3orf84	2.6522	0.34127	4.96312	13.9839	3.80569	0.0274923	0.0362201	Up	0.225276	0.129482	0.12922	0	0	0.0305858	GeneID:114109327	chromosome 19 C3orf84 homolog
C1D	507.615	251.106	764.124	3.04459	1.60625	1.01548e-16	2.57199e-16	Up	5.40315	5.50192	6.30287	2.14061	1.10136	2.0879	GeneID:101111532	C1D nuclear receptor corepressor	GO:0000460,GO:0003677,GO:0003714,GO:0003723,GO:0005730,GO:0005737,GO:0006915,GO:0016922,GO:0017053,GO:0045892	maturation of 5.8S rRNA|DNA binding|transcription corepressor activity|RNA binding|nucleolus|cytoplasm|apoptotic process|nuclear receptor binding|transcriptional repressor complex|negative regulation of transcription, DNA-templated	oas03018	RNA degradation
C1GALT1	779.86	170.412	1389.31	8.15426	3.02755	2.28142e-22	7.07592e-22	Up	6.02201	6.0748	6.33469	0.921106	0.427166	0.785545	GeneID:101120567	core 1 synthase, glycoprotein-N-acetylgalactosamine 3-beta-galactosyltransferase 1	GO:0001525,GO:0001822,GO:0016021,GO:0016263,GO:0016267,GO:0046872,GO:0060576	angiogenesis|kidney development|integral component of membrane|glycoprotein-N-acetylgalactosamine 3-beta-galactosyltransferase activity|O-glycan processing, core 1|metal ion binding|intestinal epithelial cell development	oas00512	Mucin type O-glycan biosynthesis
C1GALT1C1	489.384	292.823	685.945	2.34256	1.22809	1.42053e-20	4.14581e-20	Up	10.765	11.2277	11.0933	5.17448	3.853	4.32207	GeneID:101114753	C1GALT1 specific chaperone 1	GO:0016021,GO:0016263,GO:0016267	integral component of membrane|glycoprotein-N-acetylgalactosamine 3-beta-galactosyltransferase activity|O-glycan processing, core 1	oas00512	Mucin type O-glycan biosynthesis
C1H1orf122	578.324	839.576	317.073	0.377776	-1.4044	5.60152e-19	1.5455e-18	Down	9.97116	8.01169	10.3941	23.0624	19.5887	28.1211	GeneID:101116264	chromosome 1 C1orf122 homolog
C1H1orf194	8.26269	12.555	3.97042	0.316243	-1.6609	0.045891	0.0590409	Down	0.119424	0.0343205	0.0513766	0.161861	0.240348	0.210784	GeneID:101102854	chromosome 1 C1orf194 homolog
C1H1orf52	212.294	112.383	312.205	2.77914	1.47464	3.08556e-14	7.15628e-14	Up	3.82296	5.08852	4.70314	1.7726	1.24183	1.61177	GeneID:101112861	chromosome 1 C1orf52 homolog	GO:0005634	nucleus
C1H21orf91	433.076	92.7631	773.388	8.35008	3.06179	3.39199e-74	4.95076e-73	Up	3.86855	3.95977	3.59962	0.476117	0.30659	0.509357	GeneID:101116190	chromosome 1 C21orf91 homolog	GO:0021895,GO:0060999	cerebral cortex neuron differentiation|positive regulation of dendritic spine development
C1H3orf33	69.2195	28.9638	109.475	3.77522	1.91656	1.7333e-09	3.3627e-09	Up	2.06839	1.38699	1.63026	0.566909	0.374136	0.334911	GeneID:101121061	chromosome 1 C3orf33 homolog	GO:0005615,GO:0016021,GO:0051090,GO:0070373	extracellular space|integral component of membrane|regulation of DNA-binding transcription factor activity|negative regulation of ERK1 and ERK2 cascade
C1H3orf38	355.174	163.967	546.381	3.33155	1.73619	2.08892e-34	9.74392e-34	Up	8.96257	9.48589	9.26528	2.98246	2.4342	2.44732	GeneID:101122486	chromosome 1 C3orf38 homolog	GO:0006915	apoptotic process
C1QL1	64.3671	90.0201	38.7141	0.4302	-1.21692	5.78834e-05	9.19207e-05	Down	0.689089	0.587643	0.481193	1.10857	1.29438	1.45218	GeneID:101118714	complement C1q like 1	GO:0005102,GO:0005581,GO:0005737,GO:0016322,GO:0043083,GO:0044301,GO:0061743,GO:0098793,GO:0099558	signaling receptor binding|collagen trimer|cytoplasm|neuron remodeling|synaptic cleft|climbing fiber|motor learning|presynapse|maintenance of synapse structure
C1QTNF3	97.2162	31.3497	163.083	5.20102	2.37879	5.56252e-20	1.58803e-19	Up	1.57037	1.39628	1.32379	0.271635	0.260752	0.247369	GeneID:101113100	C1q and TNF related 3	GO:0005581,GO:0005623,GO:0010629,GO:0016020,GO:0035356,GO:0045444,GO:0045721,GO:0050715,GO:0050728,GO:0070062,GO:0070165,GO:0070206,GO:0071638,GO:1900165,GO:1901223	collagen trimer|cell|negative regulation of gene expression|membrane|cellular triglyceride homeostasis|fat cell differentiation|negative regulation of gluconeogenesis|positive regulation of cytokine secretion|negative regulation of inflammatory response|extracellular exosome|positive regulation of adiponectin secretion|protein trimerization|negative regulation of monocyte chemotactic protein-1 pr…
C1QTNF5	171.955	245.647	98.2638	0.400077	-1.32165	9.45244e-12	2.00369e-11	Down	1.50954	1.78724	1.38902	3.4014	3.72161	3.93035	GeneID:105602415	C1q and TNF related 5	GO:0005581,GO:0005615,GO:0005886,GO:0005923,GO:0009306,GO:0016324,GO:0016328,GO:0030133,GO:0042802,GO:0042995,GO:0048839,GO:0070206	collagen trimer|extracellular space|plasma membrane|bicellular tight junction|protein secretion|apical plasma membrane|lateral plasma membrane|transport vesicle|identical protein binding|cell projection|inner ear development|protein trimerization
C20H6orf226	275.942	368.691	183.193	0.497039	-1.00857	1.30493e-10	2.64406e-10	Down	5.71422	6.39764	6.79442	11.0685	11.9474	12.8657	GeneID:114109734	chromosome 20 C6orf226 homolog
C20H6orf62	3540.96	2115.81	4966.12	2.3468	1.2307	2.72943e-26	9.64818e-26	Up	40.5527	39.5116	38.0775	15.732	19.3308	12.6059	GeneID:101107053	chromosome 20 C6orf62 homolog	GO:0005622	intracellular
C21H11orf54	301.867	70.8867	532.847	7.53016	2.91268	4.8894e-64	5.64496e-63	Up	5.54286	5.87148	5.5851	0.59872	0.691477	0.839662	GeneID:101118909	chromosome 21 C11orf54 homolog	GO:0008270,GO:0016604,GO:0016788	zinc ion binding|nuclear body|hydrolase activity, acting on ester bonds
C21H11orf68	1877.4	2905.73	849.064	0.292232	-1.77481	3.61036e-70	4.83535e-69	Down	14.859	15.6533	14.7744	45.9958	46.2926	53.8635	GeneID:101111405	chromosome 21 C11orf68 homolog
C22H10orf143	144.451	198.605	90.2974	0.454866	-1.13649	5.80945e-08	1.06126e-07	Down	1.7961	1.63897	1.63566	3.51348	3.02596	3.97712	GeneID:105606169	chromosome 22 C10orf143 homolog
C22H10orf62	13.2227	4.28792	22.1575	5.16522	2.36883	0.000434989	0.000655658	Up	0.364918	0.367051	0.382959	0.062948	0.0778931	0.0630572	GeneID:105604361	chromosome 22 C10orf62 homolog
C23H18orf21	446.825	179.223	714.426	3.98796	1.99565	2.51652e-33	1.12952e-32	Up	5.44715	5.75022	5.49884	1.60813	0.940696	1.40589	GeneID:101109579	chromosome 23 C18orf21 homolog
C23H18orf25	1072.77	627.863	1517.68	2.41628	1.27279	6.03104e-33	2.67893e-32	Up	6.64125	6.91816	7.0028	2.75	3.02434	2.27513	GeneID:101112104	chromosome 23 C18orf25 homolog
C23H18orf32	460.465	289.797	631.133	2.1784	1.12327	2.54529e-18	6.84503e-18	Up	13.7671	14.5465	13.2528	6.44831	5.3841	6.19121	GeneID:105604515	chromosome 23 C18orf32 homolog
C23H18orf54	201.006	38.3085	363.704	9.49657	3.24741	9.35359e-47	6.58804e-46	Up	1.33309	1.3525	1.56635	0.190079	0.0940831	0.139145	GeneID:101119778	chromosome 23 C18orf54 homolog	GO:0005576,GO:0008285	extracellular region|negative regulation of cell proliferation
C24H16orf72	2208.7	877.984	3539.42	4.0299	2.01075	3.52464e-87	6.54186e-86	Up	28.7536	28.6183	27.8275	6.77666	7.67746	5.55142	GeneID:101106302	chromosome 24 C16orf72 homolog
C24H16orf91	818.548	1125.46	511.633	0.454678	-1.13708	6.47925e-25	2.19225e-24	Down	11.7276	12.6575	12.5364	23.5394	25.7601	27.3105	GeneID:105604846	chromosome 24 C16orf91 homolog	GO:0016021	integral component of membrane
C24H7orf26	1121.09	1496.48	745.692	0.498335	-1.00481	1.73016e-24	5.763e-24	Down	8.70324	9.96603	10.3319	17.8641	18.6835	18.3946	GeneID:101106388	chromosome 24 C7orf26 homolog
C24H7orf50	846.58	1334.74	358.418	0.268593	-1.89651	5.16196e-41	3.00187e-40	Down	7.0464	8.58334	9.25494	27.4138	25.7842	34.0712	GeneID:105604881	chromosome 24 C7orf50 homolog	GO:0003723	RNA binding
C26H4orf47	309.484	205.886	413.082	2.00443	1.00319	9.84321e-08	1.78158e-07	Up	5.6989	5.98697	5.94662	3.33753	3.185	1.81877	GeneID:101113197	chromosome 26 C4orf47 homolog	GO:0005737,GO:0005813	cytoplasm|centrosome
C2CD5	859.432	184.504	1534.36	8.32213	3.05695	5.30389e-148	2.98856e-146	Up	8.14548	8.73204	8.31234	1.01157	0.82856	1.01847	GeneID:101116387	C2 calcium dependent domain containing 5	GO:0005509,GO:0005544,GO:0005815,GO:0005829,GO:0005886,GO:0005938,GO:0006906,GO:0010828,GO:0030659,GO:0031340,GO:0032587,GO:0032869,GO:0038028,GO:0065002,GO:0072659,GO:0090314,GO:2001275	calcium ion binding|calcium-dependent phospholipid binding|microtubule organizing center|cytosol|plasma membrane|cell cortex|vesicle fusion|positive regulation of glucose transmembrane transport|cytoplasmic vesicle membrane|positive regulation of vesicle fusion|ruffle membrane|cellular response to insulin stimulus|insulin receptor signaling pathway via phosphatidylinositol 3-kinase|intracellular …
C2H2orf69	187.989	80.9919	294.987	3.64876	1.86741	5.65196e-18	1.49945e-17	Up	2.48985	2.11186	2.38181	0.459117	0.557125	0.786304	GeneID:101102877	chromosome 2 C2orf69 homolog	GO:0005576	extracellular region
C2H2orf88	153.947	58.5134	249.38	4.25543	2.0893	1.27258e-18	3.46517e-18	Up	1.64448	1.58357	1.59316	0.514016	0.305306	0.254425	GeneID:101111429	chromosome 2 C2orf88 homolog	GO:0005886,GO:0034237	plasma membrane|protein kinase A regulatory subunit binding
C2H9orf43	20.6745	12.9271	28.4219	2.20179	1.13867	0.040857	0.0528094	Up	0.188828	0.161793	0.25273	0.0331758	0.118231	0.106347	GeneID:101105879	chromosome 2 C9orf43 homolog
C2H9orf85	77.8885	14.2806	141.496	9.94579	3.31409	1.15339e-22	3.61053e-22	Up	1.27977	1.3069	1.60826	0.139027	0.0825769	0.176407	GeneID:101101954	chromosome 2 C9orf85 homolog
C3H12orf10	1203.77	1794.6	612.944	0.341616	-1.54955	2.06631e-39	1.13534e-38	Down	12.8576	13.0004	15.8798	36.9363	35.6373	42.6091	GeneID:101105232	chromosome 3 C12orf10 homolog	GO:0005634,GO:0005654,GO:0005739,GO:0035641	nucleus|nucleoplasm|mitochondrion|locomotory exploration behavior
C3H12orf4	402.788	232.582	572.993	2.46502	1.3016	7.31094e-20	2.08087e-19	Up	5.90777	6.0214	5.15076	2.13567	1.99416	2.4103	GeneID:101116469	chromosome 3 C12orf4 homolog	GO:0005737,GO:0043304	cytoplasm|regulation of mast cell degranulation
C3H12orf57	2400.59	3271.85	1529.34	0.467478	-1.09703	1.18018e-21	3.5688e-21	Down	41.2171	43.9392	47.9388	85.4204	78.8227	103.996	GeneID:101108904	chromosome 3 C12orf57 homolog	GO:0005737	cytoplasm
C3H12orf73	240.32	346.424	134.217	0.387458	-1.36789	1.28296e-15	3.12681e-15	Down	7.0769	8.03873	9.7372	19.7373	21.8306	19.0178	GeneID:101111954	chromosome 3 C12orf73 homolog	GO:0005576	extracellular region
C3H2orf81	10.7081	17.4616	3.95462	0.226765	-2.14073	0.0082869	0.0114444	Down	0.0236523	0.0118952	0.106841	0.224399	0.199927	0.168591	GeneID:101116894	chromosome 3 C2orf81 homolog
C3H9orf116	1711.35	2462.77	959.932	0.389836	-1.35906	1.07247e-39	5.95521e-39	Down	27.9661	28.7092	31.6654	68.4035	66.5186	78.7558	GeneID:101109255	chromosome 3 C9orf116 homolog	GO:0005634,GO:0006974,GO:0007368,GO:0010468,GO:0071494	nucleus|cellular response to DNA damage stimulus|determination of left/right symmetry|regulation of gene expression|cellular response to UV-C
C3H9orf16	4465.16	6684.6	2245.72	0.335976	-1.57357	1.27112e-55	1.14872e-54	Down	81.6357	88.0278	92.2095	235.271	222.905	276.518	GeneID:101121160	chromosome 3 C9orf16 homolog
C3H9orf50	134.815	186.922	82.7077	0.442464	-1.17637	2.84892e-06	4.8231e-06	Down	1.04847	2.14686	1.50352	3.6947	3.0069	3.32744	GeneID:101104898	chromosome 3 C9orf50 homolog
C5AR2	26.0689	15.7557	36.3821	2.30441	1.2044	0.010175	0.0139443	Up	0.408606	0.273996	0.319016	0.180909	0.144976	0.0862967	GeneID:101118552	complement component 5a receptor 2	GO:0002430,GO:0004878,GO:0004930,GO:0005886,GO:0006935,GO:0006954,GO:0007200,GO:0007204,GO:0009925,GO:0016021,GO:0030449,GO:0032720,GO:0045177,GO:0050679,GO:0070374,GO:0090024,GO:1900165,GO:2000482	complement receptor mediated signaling pathway|complement component C5a receptor activity|G protein-coupled receptor activity|plasma membrane|chemotaxis|inflammatory response|phospholipase C-activating G protein-coupled receptor signaling pathway|positive regulation of cytosolic calcium ion concentration|basal plasma membrane|integral component of membrane|regulation of complement activation|nega…
C5H19orf24	1093.29	1531.23	655.358	0.428079	-1.22405	3.66104e-30	1.48489e-29	Down	14.9735	15.3502	17.3152	33.6172	33.4139	37.9333	GeneID:101114192	chromosome 5 C19orf24 homolog	GO:0005576,GO:0005737,GO:0016021	extracellular region|cytoplasm|integral component of membrane
C5H19orf25	985.626	1456.45	514.806	0.353549	-1.50002	2.08597e-32	9.10831e-32	Down	7.80514	7.09443	8.58969	19.219	19.3645	24.0261	GeneID:101118693	chromosome 5 C19orf25 homolog
C5H19orf38	33.8411	45.2032	22.4789	0.49732	-1.00775	0.0106554	0.0145857	Down	0.468392	0.320368	0.488984	0.782116	0.879824	0.765667	GeneID:101115789	chromosome 5 C19orf38 homolog	GO:0016021	integral component of membrane
C5H19orf53	3631.27	4917.82	2344.72	0.476816	-1.06849	2.17739e-36	1.0828e-35	Down	66.5472	64.2891	68.2902	128.105	124.581	141.312	GeneID:101102725	chromosome 5 C19orf53 homolog
C5H19orf66	192.72	265.699	119.741	0.450632	-1.14998	3.85888e-11	7.98598e-11	Down	3.26348	3.10163	2.96638	6.28993	6.97479	6.30084	GeneID:101111277	chromosome 5 C19orf66 homolog	GO:0003723,GO:0005634,GO:0005737,GO:0034340,GO:0034341,GO:0034342,GO:0045071,GO:0051607	RNA binding|nucleus|cytoplasm|response to type I interferon|response to interferon-gamma|response to type III interferon|negative regulation of viral genome replication|defense response to virus
C5H5orf24	1589.65	422.628	2756.67	6.52419	2.7058	6.89522e-124	2.50692e-122	Up	16.2141	15.419	15.7863	2.65262	1.86425	2.35	GeneID:101104063	chromosome 5 C5orf24 homolog
C5H5orf30	328.238	99.5863	556.889	5.5893	2.48267	3.96676e-59	3.99871e-58	Up	4.72926	5.16542	5.35428	0.907647	0.890036	0.780558	GeneID:101114866	chromosome 5 C5orf30 homolog	GO:0005737,GO:0010764,GO:0015031,GO:0035869,GO:0060271,GO:1900016	cytoplasm|negative regulation of fibroblast migration|protein transport|ciliary transition zone|cilium assembly|negative regulation of cytokine production involved in inflammatory response
C6H4orf48	63.242	92.0942	34.3898	0.373671	-1.42016	7.51113e-06	1.24829e-05	Down	1.67405	2.28521	2.28059	5.50215	4.04297	6.19355	GeneID:101103156	chromosome 6 C4orf48 homolog	GO:0005576	extracellular region
C7H14orf119	698.511	410.984	986.039	2.39883	1.26233	3.72008e-27	1.35252e-26	Up	14.0124	12.6056	14.7601	6.1156	5.18362	5.00877	GeneID:101122441	chromosome 7 C14orf119 homolog	GO:0005739,GO:0005829	mitochondrion|cytosol
C8G	56.0669	77.0682	35.0655	0.45513	-1.13565	0.000505181	0.000758468	Down	0.626751	0.507407	0.491036	1.30528	0.84707	1.22037	GeneID:114113848	complement C8 gamma chain	GO:0005576,GO:0005579,GO:0006957,GO:0006958,GO:0019835,GO:0019841,GO:0030449,GO:0070062,GO:0072562	extracellular region|membrane attack complex|complement activation, alternative pathway|complement activation, classical pathway|cytolysis|retinol binding|regulation of complement activation|extracellular exosome|blood microparticle	oas04610,oas05020,oas05146,oas05322	Complement and coagulation cascades|Prion diseases|Amoebiasis|Systemic lupus erythematosus
C9H8orf33	529.199	804.845	253.553	0.315146	-1.66591	1.03565e-24	3.47997e-24	Down	3.28987	3.25301	4.18398	10.3953	8.87672	12.7849	GeneID:101105761	chromosome 9 C8orf33 homolog
C9H8orf37	111.63	32.7822	190.477	5.82005	2.54103	4.00469e-24	1.32024e-23	Up	1.70851	1.73697	1.86255	0.296301	0.232929	0.331734	GeneID:101108579	chromosome 9 C8orf37 homolog	GO:0001917,GO:0005737,GO:0005829,GO:0005886,GO:0008594,GO:0030054,GO:0097546	photoreceptor inner segment|cytoplasm|cytosol|plasma membrane|photoreceptor cell morphogenesis|cell junction|ciliary base
C9H8orf82	177.366	254.868	99.8644	0.392015	-1.35102	8.46314e-12	1.79775e-11	Down	1.56867	1.96312	1.99577	4.17059	4.09436	5.02726	GeneID:101118030	chromosome 9 C8orf82 homolog
C9H8orf89	101.188	56.885	145.491	2.55958	1.35591	1.20098e-08	2.25811e-08	Up	1.79284	1.57641	1.87118	0.608285	0.624465	0.699612	GeneID:101106597	chromosome 9 C8orf89 homolog
C9orf72	394.093	102.356	685.831	6.70073	2.74432	9.09495e-36	4.44164e-35	Up	6.31764	5.96689	5.13898	1.19241	0.472162	0.796316	GeneID:101111774	C9orf72-SMCR8 complex subunit	GO:0000932,GO:0001933,GO:0005085,GO:0005615,GO:0005634,GO:0005737,GO:0005764,GO:0005768,GO:0005776,GO:0006897,GO:0006914,GO:0010494,GO:0010506,GO:0016239,GO:0017137,GO:0030425,GO:0031965,GO:0032045,GO:0034063,GO:0043204,GO:0044295,GO:0044304,GO:0048675,GO:0110053,GO:1902774,GO:1903432,GO:1904425,GO:2000785	P-body|negative regulation of protein phosphorylation|guanyl-nucleotide exchange factor activity|extracellular space|nucleus|cytoplasm|lysosome|endosome|autophagosome|endocytosis|autophagy|cytoplasmic stress granule|regulation of autophagy|positive regulation of macroautophagy|Rab GTPase binding|dendrite|nuclear membrane|guanyl-nucleotide exchange factor complex|stress granule assembly|perikaryon…
CA11	43.2614	61.7018	24.821	0.402144	-1.31421	0.000351188	0.000532466	Down	0.486591	0.632187	0.407038	1.00024	1.44718	1.13686	GeneID:443426	carbonic anhydrase 11	GO:0005576,GO:0008270	extracellular region|zinc ion binding
CAAP1	299.659	195.269	404.048	2.06978	1.04948	1.68423e-11	3.53624e-11	Up	4.98186	4.35006	5.31265	1.98355	2.40118	2.29355	GeneID:101109512	caspase activity and apoptosis inhibitor 1	GO:0006915,GO:2001268	apoptotic process|negative regulation of cysteine-type endopeptidase activity involved in apoptotic signaling pathway
CAB39	977.079	306.519	1647.64	5.37439	2.4261	1.08336e-126	4.16359e-125	Up	11.0955	11.8698	11.9369	2.03382	2.17075	1.93117	GeneID:101106309	calcium binding protein 39	GO:0004674,GO:0005576,GO:0005622,GO:0005829,GO:0007050,GO:0010800,GO:0018105,GO:0019900,GO:0023014,GO:0030295,GO:0034774,GO:0035556,GO:0043312,GO:0043539,GO:0051291,GO:0070062,GO:0071476,GO:0071902,GO:1901017,GO:1901380,GO:1902554,GO:1904813	protein serine/threonine kinase activity|extracellular region|intracellular|cytosol|cell cycle arrest|positive regulation of peptidyl-threonine phosphorylation|peptidyl-serine phosphorylation|kinase binding|signal transduction by protein phosphorylation|protein kinase activator activity|secretory granule lumen|intracellular signal transduction|neutrophil degranulation|protein serine/threonine kin…	oas04150,oas04152	mTOR signaling pathway|AMPK signaling pathway
CAB39L	192.577	52.8954	332.259	6.28602	2.65215	5.12073e-35	2.44919e-34	Up	2.63722	2.34902	3.02204	0.482323	0.298418	0.422765	GeneID:101115803	calcium binding protein 39 like	GO:0005622,GO:0023014	intracellular|signal transduction by protein phosphorylation	oas04150,oas04152	mTOR signaling pathway|AMPK signaling pathway
CABCOCO1	156.029	73.2991	238.759	3.25764	1.70383	1.92781e-15	4.66787e-15	Up	2.41191	2.34481	2.5528	0.890422	0.54025	0.690555	GeneID:101121486	ciliary associated calcium binding coiled-coil 1	GO:0005509,GO:0005737,GO:0005813,GO:0036126	calcium ion binding|cytoplasm|centrosome|sperm flagellum
CABIN1	2675.87	3644.82	1706.92	0.468338	-1.09438	3.24488e-35	1.55937e-34	Down	6.89346	7.27844	6.45575	13.2504	13.6746	14.6443	GeneID:101112167	calcineurin binding protein 1	GO:0004864,GO:0005634,GO:0005654,GO:0005829,GO:0006336,GO:0007166,GO:0016235	protein phosphatase inhibitor activity|nucleus|nucleoplasm|cytosol|DNA replication-independent nucleosome assembly|cell surface receptor signaling pathway|aggresome
CABP1	17.4453	25.6363	9.25428	0.361595	-1.46755	0.0154031	0.0207888	Down	0.044348	0.0185863	0.0408072	0.0771373	0.0590062	0.133468	GeneID:101112516	calcium binding protein 1	GO:0005509,GO:0005794,GO:0005856,GO:0007601,GO:0008139,GO:0014069,GO:0030054,GO:0042308,GO:0045211,GO:0048306,GO:0048471,GO:0050896	calcium ion binding|Golgi apparatus|cytoskeleton|visual perception|nuclear localization sequence binding|postsynaptic density|cell junction|negative regulation of protein import into nucleus|postsynaptic membrane|calcium-dependent protein binding|perinuclear region of cytoplasm|response to stimulus
CABP5	12.6163	5.36092	19.8717	3.72772	1.89829	0.0117386	0.0160159	Up	0.388188	0.360422	0.149872	0.0283301	0.05609	0.141896	GeneID:101120597	calcium binding protein 5	GO:0005509,GO:0005829	calcium ion binding|cytosol
CACFD1	864.937	1267.59	462.284	0.36478	-1.4549	6.6995e-35	3.18705e-34	Down	6.04161	5.61145	6.37431	14.403	14.8979	17.2989	GeneID:101111957	calcium channel flower domain containing 1	GO:0016021,GO:0016192	integral component of membrane|vesicle-mediated transport
CACHD1	491.345	317.701	664.988	2.0934	1.06585	3.01499e-16	7.53906e-16	Up	3.35371	3.14275	3.55657	1.33797	1.6802	1.51552	GeneID:101110191	cache domain containing 1	GO:0005245,GO:0005891	voltage-gated calcium channel activity|voltage-gated calcium channel complex
CACNA1H	34.445	51.0276	17.8624	0.349856	-1.51517	0.000257615	0.000393163	Down	0.0414082	0.0394581	0.0371906	0.0889099	0.14328	0.0869929	GeneID:101119120	calcium voltage-gated channel subunit alpha1 H	GO:0005244,GO:0005886,GO:0005887,GO:0005891,GO:0006936,GO:0007517,GO:0007520,GO:0008016,GO:0008332,GO:0016021,GO:0019228,GO:0032342,GO:0032870,GO:0034651,GO:0034765,GO:0035865,GO:0042391,GO:0045956,GO:0046872,GO:0070509,GO:0086010,GO:0097110,GO:0098662,GO:2000344	voltage-gated ion channel activity|plasma membrane|integral component of plasma membrane|voltage-gated calcium channel complex|muscle contraction|muscle organ development|myoblast fusion|regulation of heart contraction|low voltage-gated calcium channel activity|integral component of membrane|neuronal action potential|aldosterone biosynthetic process|cellular response to hormone stimulus|cortisol …	oas04010,oas04020,oas04713,oas04925,oas04927,oas04934	MAPK signaling pathway|Calcium signaling pathway|Circadian entrainment|Aldosterone synthesis and secretion|Cortisol synthesis and secretion|Cushing syndrome
CACNA2D1	1084.38	251.928	1916.83	7.61226	2.92832	2.90398e-124	1.06956e-122	Up	4.48484	4.56874	4.28316	0.631171	0.439528	0.584301	GeneID:101123550	calcium voltage-gated channel auxiliary subunit alpha2delta 1	GO:0005245,GO:0005886,GO:0005891,GO:0006816,GO:0016529,GO:0046872,GO:0051924,GO:0060307,GO:0060402,GO:0061577,GO:0070062,GO:0086002,GO:0086048,GO:0086091,GO:0098703,GO:0098903,GO:1901843,GO:1902514,GO:1904646,GO:1990454	voltage-gated calcium channel activity|plasma membrane|voltage-gated calcium channel complex|calcium ion transport|sarcoplasmic reticulum|metal ion binding|regulation of calcium ion transport|regulation of ventricular cardiac muscle cell membrane repolarization|calcium ion transport into cytosol|calcium ion transmembrane transport via high voltage-gated calcium channel|extracellular exosome|cardi…	oas04010,oas04260,oas04261,oas04921,oas05410,oas05412,oas05414	MAPK signaling pathway|Cardiac muscle contraction|Adrenergic signaling in cardiomyocytes|Oxytocin signaling pathway|Hypertrophic cardiomyopathy (HCM)|Arrhythmogenic right ventricular cardiomyopathy (ARVC)|Dilated cardiomyopathy (DCM)
CACUL1	1414.12	495.597	2332.64	4.70572	2.23441	3.65689e-83	6.40885e-82	Up	5.95777	6.49845	6.37312	1.11079	1.52196	1.14812	GeneID:101105965	CDK2 associated cullin domain 1	GO:0000082,GO:0006511,GO:0008284,GO:0019901,GO:0031625,GO:0045860	G1/S transition of mitotic cell cycle|ubiquitin-dependent protein catabolic process|positive regulation of cell proliferation|protein kinase binding|ubiquitin protein ligase binding|positive regulation of protein kinase activity
CACYBP	2474.12	1146.53	3801.71	3.31603	1.72946	3.97396e-89	7.63638e-88	Up	73.6087	74.7223	75.526	23.3891	19.3434	21.0498	GeneID:101116245	calcyclin binding protein	GO:0005634,GO:0005641,GO:0005654,GO:0005829,GO:0007507,GO:0015631,GO:0019005,GO:0019904,GO:0030877,GO:0031625,GO:0042803,GO:0044548,GO:1990830	nucleus|nuclear envelope lumen|nucleoplasm|cytosol|heart development|tubulin binding|SCF ubiquitin ligase complex|protein domain specific binding|beta-catenin destruction complex|ubiquitin protein ligase binding|protein homodimerization activity|S100 protein binding|cellular response to leukemia inhibitory factor	oas04310	Wnt signaling pathway
CADM1	2174.18	1375.8	2972.56	2.16034	1.11126	1.19995e-44	7.93029e-44	Up	18.9531	18.7527	18.0812	8.34214	8.53714	7.5333	GeneID:101115479	cell adhesion molecule 1	GO:0001889,GO:0005102,GO:0005886,GO:0005911,GO:0007156,GO:0007157,GO:0007420,GO:0008037,GO:0014069,GO:0016021,GO:0016323,GO:0030165,GO:0042271,GO:0042803,GO:0043005,GO:0045211,GO:0045954,GO:0050839,GO:0051606	liver development|signaling receptor binding|plasma membrane|cell-cell junction|homophilic cell adhesion via plasma membrane adhesion molecules|heterophilic cell-cell adhesion via plasma membrane cell adhesion molecules|brain development|cell recognition|postsynaptic density|integral component of membrane|basolateral plasma membrane|PDZ domain binding|susceptibility to natural killer cell mediate…	oas04514	Cell adhesion molecules (CAMs)
CAGE1	39.9757	11.5474	68.4041	5.92289	2.5663	1.61956e-09	3.14722e-09	Up	0.516024	0.527989	0.803779	0.0759685	0.12534	0.0930115	GeneID:101119428	cancer antigen 1
CALCOCO2	1630.39	901.743	2359.04	2.61537	1.38702	6.39665e-42	3.82043e-41	Up	25.2535	25.1333	25.8309	9.03394	10.6436	7.88551	GeneID:101114034	calcium binding and coiled-coil domain 2	GO:0000421,GO:0005776,GO:0005829,GO:0005856,GO:0031410,GO:0034341,GO:0042803,GO:0048471,GO:0098792,GO:1901098	autophagosome membrane|autophagosome|cytosol|cytoskeleton|cytoplasmic vesicle|response to interferon-gamma|protein homodimerization activity|perinuclear region of cytoplasm|xenophagy|positive regulation of autophagosome maturation	oas04137,oas05164	Mitophagy - animal|Influenza A
CALCRL	13.7317	2.66424	24.7991	9.3621	3.22683	1.89546e-05	3.08843e-05	Up	0.0888398	0.131687	0.131421	0.00887224	0.00878295	0.0177753	GeneID:101115511	calcitonin receptor like receptor	GO:0001525,GO:0001605,GO:0001635,GO:0004948,GO:0005886,GO:0007166,GO:0016021,GO:0031623,GO:0043235	angiogenesis|adrenomedullin receptor activity|calcitonin gene-related peptide receptor activity|calcitonin receptor activity|plasma membrane|cell surface receptor signaling pathway|integral component of membrane|receptor internalization|receptor complex	oas04080,oas04270	Neuroactive ligand-receptor interaction|Vascular smooth muscle contraction
CALD1	52237.5	14356.6	90118.5	6.27726	2.65013	1.90709e-258	9.30067e-256	Up	477.183	472.447	472.588	76.7145	64.4785	72.778	GeneID:101121342	caldesmon 1	GO:0003779,GO:0005516,GO:0005523,GO:0005829,GO:0005856,GO:0005886,GO:0006936,GO:0015629,GO:0017022,GO:0030016,GO:0030478,GO:0043231,GO:0045296	actin binding|calmodulin binding|tropomyosin binding|cytosol|cytoskeleton|plasma membrane|muscle contraction|actin cytoskeleton|myosin binding|myofibril|actin cap|intracellular membrane-bounded organelle|cadherin binding	oas04270	Vascular smooth muscle contraction
CALHM5	250.477	133.601	367.354	2.74908	1.45895	1.01224e-19	2.8701e-19	Up	2.84033	3.01518	3.37483	1.11561	1.07327	0.983753	GeneID:105612589	calcium homeostasis modulator family member 5	GO:0005887,GO:0006811	integral component of plasma membrane|ion transport
CALML4	303.375	191.31	415.44	2.16996	1.11767	2.73256e-13	6.11206e-13	Up	6.0612	5.88543	5.69085	2.89518	2.69514	2.10198	GeneID:100037684	calmodulin like 4	GO:0005509,GO:0005634,GO:0019722,GO:0030234,GO:0051300	calcium ion binding|nucleus|calcium-mediated signaling|enzyme regulator activity|spindle pole body organization	oas04014,oas04015,oas04020,oas04022,oas04024,oas04070,oas04114,oas04218,oas04261,oas04270,oas04371,oas04625,oas04713,oas04720,oas04722,oas04728,oas04740,oas04744,oas04750,oas04910,oas04912,oas04915,oas04916,oas04921,oas04922,oas04924,oas04925,oas04970,oas04971,oas05010,oas05031,oas05034,oas05133,oas05152,oas05163,oas05167,oas05170,oas05200,oas05214,oas05418	Ras signaling pathway|Rap1 signaling pathway|Calcium signaling pathway|cGMP-PKG signaling pathway|cAMP signaling pathway|Phosphatidylinositol signaling system|Oocyte meiosis|Cellular senescence|Adrenergic signaling in cardiomyocytes|Vascular smooth muscle contraction|Apelin signaling pathway|C-type lectin receptor signaling pathway|Circadian entrainment|Long-term potentiation|Neurotrophin signali…
CALU	11348.4	6551.69	16145.2	2.46414	1.30108	9.67321e-43	5.95855e-42	Up	122.963	123.341	122.245	48.4733	54.0853	39.0162	GeneID:101111450	calumenin	GO:0005509,GO:0005576,GO:0005783,GO:0005789,GO:0005794,GO:0033018,GO:0042470	calcium ion binding|extracellular region|endoplasmic reticulum|endoplasmic reticulum membrane|Golgi apparatus|sarcoplasmic reticulum lumen|melanosome
CAMK2D	2489.09	1337.34	3640.84	2.72184	1.44458	5.68315e-56	5.17891e-55	Up	23.3888	22.8925	23.931	8.3597	9.05774	6.98454	GeneID:101113850	calcium/calmodulin dependent protein kinase II delta	GO:0001666,GO:0004672,GO:0004683,GO:0005516,GO:0005524,GO:0005634,GO:0005737,GO:0005829,GO:0006468,GO:0010389,GO:0010613,GO:0010649,GO:0010666,GO:0010880,GO:0010881,GO:0014911,GO:0018105,GO:0018107,GO:0030007,GO:0032469,GO:0032991,GO:0033017,GO:0035022,GO:0042383,GO:0043005,GO:0044325,GO:0046777,GO:0048471,GO:0048661,GO:0050998,GO:0055119,GO:0060341,GO:0061049,GO:0070374,GO:0086003,GO:0098901,GO:…	response to hypoxia|protein kinase activity|calmodulin-dependent protein kinase activity|calmodulin binding|ATP binding|nucleus|cytoplasm|cytosol|protein phosphorylation|regulation of G2/M transition of mitotic cell cycle|positive regulation of cardiac muscle hypertrophy|regulation of cell communication by electrical coupling|positive regulation of cardiac muscle cell apoptotic process|regulation…	oas04012,oas04020,oas04024,oas04066,oas04114,oas04217,oas04261,oas04310,oas04360,oas04713,oas04720,oas04722,oas04725,oas04728,oas04740,oas04750,oas04911,oas04912,oas04916,oas04921,oas04922,oas04925,oas04934,oas04971,oas05031,oas05152,oas05200,oas05205,oas05214	ErbB signaling pathway|Calcium signaling pathway|cAMP signaling pathway|HIF-1 signaling pathway|Oocyte meiosis|Necroptosis|Adrenergic signaling in cardiomyocytes|Wnt signaling pathway|Axon guidance|Circadian entrainment|Long-term potentiation|Neurotrophin signaling pathway|Cholinergic synapse|Dopaminergic synapse|Olfactory transduction|Inflammatory mediator regulation of TRP channels|Insulin secr…
CAMK2N2	111.775	153.096	70.4541	0.46013	-1.11989	3.97058e-07	6.98371e-07	Down	1.75298	1.91655	1.75966	4.04936	3.60297	3.50105	GeneID:106990878	calcium/calmodulin dependent protein kinase II inhibitor 2	GO:0005634,GO:0005813,GO:0005829,GO:0008427,GO:0019901	nucleus|centrosome|cytosol|calcium-dependent protein kinase inhibitor activity|protein kinase binding
CAMKK1	244.146	360.233	128.059	0.355492	-1.49211	2.43583e-17	6.30158e-17	Down	0.894127	1.14999	0.801896	2.47536	2.45733	2.62593	GeneID:101102157	calcium/calmodulin dependent protein kinase kinase 1	GO:0004674,GO:0004683,GO:0005516,GO:0005524,GO:0005634,GO:0005737,GO:0005829,GO:0035556,GO:0045860	protein serine/threonine kinase activity|calmodulin-dependent protein kinase activity|calmodulin binding|ATP binding|nucleus|cytoplasm|cytosol|intracellular signal transduction|positive regulation of protein kinase activity	oas05034	Alcoholism
CAMKV	22.2643	31.2953	13.2332	0.422625	-1.24255	0.012399	0.0168776	Down	0.121426	0.122135	0.104476	0.205717	0.350273	0.22256	GeneID:101123415	CaM kinase like vesicle associated	GO:0004683,GO:0005516,GO:0005524,GO:0005886,GO:0030659,GO:0098794	calmodulin-dependent protein kinase activity|calmodulin binding|ATP binding|plasma membrane|cytoplasmic vesicle membrane|postsynapse
CAND1	3004.49	885.714	5123.27	5.78519	2.53236	8.89623e-91	1.76713e-89	Up	10.1855	10.245	9.72173	1.94041	1.24657	1.73538	GeneID:101107775	cullin associated and neddylation dissociated 1	GO:0000151,GO:0005576,GO:0005634,GO:0005654,GO:0005737,GO:0005794,GO:0005829,GO:0006879,GO:0010265,GO:0016020,GO:0016567,GO:0017025,GO:0030154,GO:0031461,GO:0034774,GO:0043086,GO:0043312,GO:0043687,GO:0045899,GO:0070062,GO:1904813	ubiquitin ligase complex|extracellular region|nucleus|nucleoplasm|cytoplasm|Golgi apparatus|cytosol|cellular iron ion homeostasis|SCF complex assembly|membrane|protein ubiquitination|TBP-class protein binding|cell differentiation|cullin-RING ubiquitin ligase complex|secretory granule lumen|negative regulation of catalytic activity|neutrophil degranulation|post-translational protein modification|p…
CANX	16375.6	9677.31	23073.8	2.38424	1.25353	6.04858e-67	7.55032e-66	Up	186.412	188.604	189.453	76.1325	80.8048	66.9518	GeneID:101122273	calnexin	GO:0005509,GO:0005783,GO:0005789,GO:0006457,GO:0016021,GO:0030246,GO:0042470,GO:0048488,GO:0051082,GO:0072583,GO:0098793	calcium ion binding|endoplasmic reticulum|endoplasmic reticulum membrane|protein folding|integral component of membrane|carbohydrate binding|melanosome|synaptic vesicle endocytosis|unfolded protein binding|clathrin-dependent endocytosis|presynapse	oas04141,oas04145,oas04612,oas04918,oas05166	Protein processing in endoplasmic reticulum|Phagosome|Antigen processing and presentation|Thyroid hormone synthesis|Human T-cell leukemia virus 1 infection
CAP2	1071.32	642.534	1500.11	2.33453	1.22313	3.19884e-42	1.93256e-41	Up	11.1129	11.1404	11.5957	4.70707	4.63175	4.36177	GeneID:101102097	cyclase associated actin cytoskeleton regulatory protein 2	GO:0000902,GO:0003779,GO:0005886,GO:0007163,GO:0007165,GO:0007190,GO:0008154,GO:0008179,GO:0014069,GO:0030864,GO:0042802,GO:0045761	cell morphogenesis|actin binding|plasma membrane|establishment or maintenance of cell polarity|signal transduction|activation of adenylate cyclase activity|actin polymerization or depolymerization|adenylate cyclase binding|postsynaptic density|cortical actin cytoskeleton|identical protein binding|regulation of adenylate cyclase activity
CAPG	18513	24945.4	12080.5	0.484285	-1.04607	5.52737e-40	3.1009e-39	Down	207.208	210.235	224.923	409.172	394.815	447.295	GeneID:101101968	capping actin protein, gelsolin like	GO:0005576,GO:0005654,GO:0005730,GO:0005814,GO:0019904,GO:0042470,GO:0051015,GO:0051016,GO:0072686,GO:0090543	extracellular region|nucleoplasm|nucleolus|centriole|protein domain specific binding|melanosome|actin filament binding|barbed-end actin filament capping|mitotic spindle|Flemming body
CAPN10	1205.13	1772.75	637.511	0.359683	-1.4752	5.77403e-41	3.34818e-40	Down	6.79197	7.31553	8.04805	18.1797	18.6206	21.2809	GeneID:101104198	calpain 10	GO:0000149,GO:0004198,GO:0005737,GO:0005739,GO:0005829,GO:0005886,GO:0006508,GO:0006921,GO:0008092,GO:0031532,GO:0032024,GO:0032388,GO:0032869,GO:0046326,GO:0097050,GO:2000676	SNARE binding|calcium-dependent cysteine-type endopeptidase activity|cytoplasm|mitochondrion|cytosol|plasma membrane|proteolysis|cellular component disassembly involved in execution phase of apoptosis|cytoskeletal protein binding|actin cytoskeleton reorganization|positive regulation of insulin secretion|positive regulation of intracellular transport|cellular response to insulin stimulus|positive …
CAPRIN1	11852.3	6784.63	16920	2.49378	1.31833	1.69309e-79	2.74917e-78	Up	111.022	111.963	115.644	43.3144	45.9208	39.1383	GeneID:101113623	cell cycle associated protein 1	GO:0000932,GO:0003723,GO:0005829,GO:0010494,GO:0017148,GO:0030425,GO:0050775,GO:0061003	P-body|RNA binding|cytosol|cytoplasmic stress granule|negative regulation of translation|dendrite|positive regulation of dendrite morphogenesis|positive regulation of dendritic spine morphogenesis
CAPRIN2	321.07	106.041	536.1	5.06299	2.33999	2.20419e-42	1.33908e-41	Up	4.19345	3.45816	3.82675	0.629596	0.649781	0.858809	GeneID:101109694	caprin family member 2	GO:0003723,GO:0005102,GO:0005634,GO:0005737,GO:0005739,GO:0005813,GO:0005829,GO:0005886,GO:0017148,GO:0030308,GO:0032092,GO:0033138,GO:0043235,GO:0045944,GO:0046872,GO:0050775,GO:0061003,GO:0090263	RNA binding|signaling receptor binding|nucleus|cytoplasm|mitochondrion|centrosome|cytosol|plasma membrane|negative regulation of translation|negative regulation of cell growth|positive regulation of protein binding|positive regulation of peptidyl-serine phosphorylation|receptor complex|positive regulation of transcription by RNA polymerase II|metal ion binding|positive regulation of dendrite morp…
CAPZA1	2925.2	1049.29	4801.11	4.57573	2.194	5.85548e-14	1.34373e-13	Up	46.3554	47.3408	48.0167	12.4442	6.19605	10.5978	GeneID:101117461	capping actin protein of muscle Z-line subunit alpha 1	GO:0008290,GO:0030036,GO:0030479,GO:0034329,GO:0051015,GO:0051016,GO:0071203	F-actin capping protein complex|actin cytoskeleton organization|actin cortical patch|cell junction assembly|actin filament binding|barbed-end actin filament capping|WASH complex	oas04144	Endocytosis
CAPZA2	1706.61	973.594	2439.62	2.50612	1.32546	1.31189e-34	6.17643e-34	Up	28.5592	30.4504	29.0863	12.4465	9.29122	11.4611	GeneID:101109168	capping actin protein of muscle Z-line subunit alpha 2	GO:0003779,GO:0008290,GO:0051016	actin binding|F-actin capping protein complex|barbed-end actin filament capping	oas04144	Endocytosis
CARF	155.304	20.8779	289.731	13.9128	3.79834	3.66035e-46	2.53022e-45	Up	1.10048	1.1415	1.11618	0.0978819	0.0394765	0.0907886	GeneID:101112293	calcium responsive transcription factor	GO:0003677,GO:0003700,GO:0005634,GO:0035865,GO:0061400,GO:0071277	DNA binding|DNA-binding transcription factor activity|nucleus|cellular response to potassium ion|positive regulation of transcription from RNA polymerase II promoter in response to calcium ion|cellular response to calcium ion
CARHSP1	4516.36	6450.83	2581.89	0.400263	-1.32098	1.35978e-60	1.43732e-59	Down	27.5664	27.502	28.5502	65.9609	61.5369	69.647	GeneID:101106225	calcium regulated heat stable protein 1	GO:0000177,GO:0000932,GO:0003677,GO:0003730,GO:0005737,GO:0005829,GO:0006355,GO:0019722,GO:0043186,GO:0043488	cytoplasmic exosome (RNase complex)|P-body|DNA binding|mRNA 3'-UTR binding|cytoplasm|cytosol|regulation of transcription, DNA-templated|calcium-mediated signaling|P granule|regulation of mRNA stability
CARM1	4685.18	6470.56	2899.79	0.448175	-1.15787	2.87899e-50	2.236e-49	Down	23.6626	23.4269	24.0206	48.2283	48.7376	52.7606	GeneID:101119559	coactivator associated arginine methyltransferase 1	GO:0003420,GO:0003713,GO:0005634,GO:0005654,GO:0005737,GO:0005829,GO:0006355,GO:0006977,GO:0007568,GO:0008013,GO:0008276,GO:0008284,GO:0008469,GO:0016032,GO:0016274,GO:0016571,GO:0019216,GO:0019919,GO:0030374,GO:0030520,GO:0032091,GO:0033146,GO:0034969,GO:0034970,GO:0034971,GO:0035242,GO:0035642,GO:0042054,GO:0042803,GO:0044212,GO:0045600,GO:0045944,GO:0051092,GO:0051591,GO:0060350,GO:0070577,GO:…	regulation of growth plate cartilage chondrocyte proliferation|transcription coactivator activity|nucleus|nucleoplasm|cytoplasm|cytosol|regulation of transcription, DNA-templated|DNA damage response, signal transduction by p53 class mediator resulting in cell cycle arrest|aging|beta-catenin binding|protein methyltransferase activity|positive regulation of cell proliferation|histone-arginine N-met…	oas01522	Endocrine resistance
CARNMT1	634.64	204.119	1065.16	5.22197	2.38459	2.0783e-67	2.62911e-66	Up	4.24475	4.55674	4.76668	0.904225	0.650641	0.897813	GeneID:101122760	carnosine N-methyltransferase 1	GO:0005634,GO:0005829,GO:0006548,GO:0008757,GO:0030735,GO:0035498	nucleus|cytosol|histidine catabolic process|S-adenosylmethionine-dependent methyltransferase activity|carnosine N-methyltransferase activity|carnosine metabolic process	oas00340	Histidine metabolism
CARS	4834.46	6498.07	3170.85	0.487992	-1.03507	1.19424e-40	6.86035e-40	Down	27.9322	28.1305	27.7064	52.2573	52.623	57.1159	GeneID:101119091	cysteinyl-tRNA synthetase	GO:0000049,GO:0004817,GO:0005524,GO:0005737,GO:0005829,GO:0006423,GO:0042803,GO:0046872	tRNA binding|cysteine-tRNA ligase activity|ATP binding|cytoplasm|cytosol|cysteinyl-tRNA aminoacylation|protein homodimerization activity|metal ion binding	oas00970	Aminoacyl-tRNA biosynthesis
CARS2	1610.1	2453.71	766.488	0.312428	-1.6784	1.89047e-41	1.11683e-40	Down	8.9556	9.70184	10.5132	26.7749	26.4466	34.7128	GeneID:101116327	cysteinyl-tRNA synthetase 2, mitochondrial	GO:0004817,GO:0005524,GO:0005737,GO:0005759,GO:0006423,GO:0046872	cysteine-tRNA ligase activity|ATP binding|cytoplasm|mitochondrial matrix|cysteinyl-tRNA aminoacylation|metal ion binding	oas00970	Aminoacyl-tRNA biosynthesis
CASC1	42.1964	18.2409	66.1519	3.63413	1.86161	8.17608e-07	1.4197e-06	Up	0.667945	0.661969	0.64091	0.12115	0.175284	0.214715	GeneID:101114856	cancer susceptibility 1
CASC3	3629.7	4973.69	2285.72	0.459575	-1.12163	2.32544e-58	2.28077e-57	Down	13.5436	13.688	13.6485	27.6959	28.2921	28.0185	GeneID:101107033	CASC3 exon junction complex subunit	GO:0000184,GO:0003723,GO:0006397,GO:0006417,GO:0008298,GO:0008380,GO:0010494,GO:0016607,GO:0030425,GO:0031625,GO:0031965,GO:0035145,GO:0042802,GO:0048471,GO:0051028	nuclear-transcribed mRNA catabolic process, nonsense-mediated decay|RNA binding|mRNA processing|regulation of translation|intracellular mRNA localization|RNA splicing|cytoplasmic stress granule|nuclear speck|dendrite|ubiquitin protein ligase binding|nuclear membrane|exon-exon junction complex|identical protein binding|perinuclear region of cytoplasm|mRNA transport	oas03013,oas03015	RNA transport|mRNA surveillance pathway
CASD1	260.64	96.2818	424.998	4.4121	2.14146	1.09494e-34	5.16537e-34	Up	3.16945	3.00766	3.06636	0.823181	0.565714	0.592901	GeneID:101114863	CAS1 domain containing 1	GO:0005794,GO:0005975,GO:0016407,GO:0030173,GO:0047186	Golgi apparatus|carbohydrate metabolic process|acetyltransferase activity|integral component of Golgi membrane|N-acetylneuraminate 7-O(or 9-O)-acetyltransferase activity
CASK	1796.03	947.738	2644.32	2.78952	1.48002	2.65296e-31	1.12069e-30	Up	9.05522	8.88809	8.24402	2.67988	3.7386	2.46418	GeneID:101102544	calcium/calmodulin dependent serine protein kinase	GO:0001953,GO:0004385,GO:0004674,GO:0005516,GO:0005524,GO:0005604,GO:0005652,GO:0005730,GO:0005737,GO:0005829,GO:0005886,GO:0005911,GO:0005925,GO:0007155,GO:0007269,GO:0010839,GO:0015629,GO:0016323,GO:0016363,GO:0031982,GO:0042043,GO:0042734,GO:0045944,GO:0060170,GO:0061045,GO:0070509,GO:0090280,GO:0090288,GO:0098685,GO:2000300	negative regulation of cell-matrix adhesion|guanylate kinase activity|protein serine/threonine kinase activity|calmodulin binding|ATP binding|basement membrane|nuclear lamina|nucleolus|cytoplasm|cytosol|plasma membrane|cell-cell junction|focal adhesion|cell adhesion|neurotransmitter secretion|negative regulation of keratinocyte proliferation|actin cytoskeleton|basolateral plasma membrane|nuclear …
CASP3	272.058	91.0491	453.066	4.97471	2.31461	6.18621e-42	3.6963e-41	Up	4.22302	3.62099	4.048	0.886698	0.674586	0.699075	GeneID:443031	caspase 3	GO:0005737,GO:0006915,GO:0030182,GO:0030216,GO:0030218,GO:0097153,GO:0097199	cytoplasm|apoptotic process|neuron differentiation|keratinocyte differentiation|erythrocyte differentiation|cysteine-type endopeptidase activity involved in apoptotic process|cysteine-type endopeptidase activity involved in apoptotic signaling pathway	oas01524,oas04010,oas04115,oas04210,oas04215,oas04650,oas04657,oas04668,oas04726,oas04932,oas04933,oas05010,oas05012,oas05014,oas05016,oas05133,oas05134,oas05145,oas05146,oas05152,oas05160,oas05161,oas05162,oas05163,oas05164,oas05165,oas05167,oas05168,oas05169,oas05170,oas05200,oas05203,oas05205,oas05206,oas05210,oas05222,oas05416	Platinum drug resistance|MAPK signaling pathway|p53 signaling pathway|Apoptosis|Apoptosis - multiple species|Natural killer cell mediated cytotoxicity|IL-17 signaling pathway|TNF signaling pathway|Serotonergic synapse|Non-alcoholic fatty liver disease (NAFLD)|AGE-RAGE signaling pathway in diabetic complications|Alzheimer disease|Parkinson disease|Amyotrophic lateral sclerosis (ALS)|Huntington dis…
CASP8	608.569	196.081	1021.06	5.20143	2.37891	4.38311e-69	5.73453e-68	Up	10.0322	10.6392	10.0306	2.11615	2.03899	1.43205	GeneID:101107334	caspase 8			oas01524,oas04115,oas04210,oas04215,oas04217,oas04620,oas04621,oas04622,oas04625,oas04657,oas04668,oas04932,oas05010,oas05016,oas05134,oas05142,oas05145,oas05152,oas05160,oas05161,oas05162,oas05163,oas05164,oas05165,oas05167,oas05168,oas05169,oas05170,oas05200,oas05203,oas05416	Platinum drug resistance|p53 signaling pathway|Apoptosis|Apoptosis - multiple species|Necroptosis|Toll-like receptor signaling pathway|NOD-like receptor signaling pathway|RIG-I-like receptor signaling pathway|C-type lectin receptor signaling pathway|IL-17 signaling pathway|TNF signaling pathway|Non-alcoholic fatty liver disease (NAFLD)|Alzheimer disease|Huntington disease|Legionellosis|Chagas dis…
CASP8AP2	787.174	37.5007	1536.85	41.0199	5.35825	4.76535e-34	2.19033e-33	Up	6.20455	6.16295	5.67259	0.179938	0.0581638	0.176571	GeneID:101109100	caspase 8 associated protein 2	GO:0003677,GO:0003714,GO:0005123,GO:0005634,GO:0005654,GO:0005737,GO:0005739,GO:0006919,GO:0007049,GO:0007165,GO:0008625,GO:0008656,GO:0016505,GO:0016605,GO:0032184,GO:0036337,GO:0071260,GO:0097190	DNA binding|transcription corepressor activity|death receptor binding|nucleus|nucleoplasm|cytoplasm|mitochondrion|activation of cysteine-type endopeptidase activity involved in apoptotic process|cell cycle|signal transduction|extrinsic apoptotic signaling pathway via death domain receptors|cysteine-type endopeptidase activator activity involved in apoptotic process|peptidase activator activity in…
CASQ2	21.5326	5.32847	37.7367	7.11574	2.83101	2.47307e-06	4.20291e-06	Up	0.534798	0.382753	0.258094	0.0390297	0.0386369	0.0781948	GeneID:101105292	calsequestrin 2	GO:0005509,GO:0010880,GO:0014809,GO:0016529,GO:0030018,GO:0033018,GO:0060315	calcium ion binding|regulation of release of sequestered calcium ion into cytosol by sarcoplasmic reticulum|regulation of skeletal muscle contraction by regulation of release of sequestered calcium ion|sarcoplasmic reticulum|Z disc|sarcoplasmic reticulum lumen|negative regulation of ryanodine-sensitive calcium-release channel activity
CASS4	53.8639	8.4937	99.234	11.6039	3.53654	2.84273e-17	7.33796e-17	Up	0.68795	0.592228	0.584809	0.0646809	0.0698508	0.0176708	GeneID:101105178	Cas scaffold protein family member 4	GO:0005737,GO:0005856,GO:0005925,GO:0007155,GO:0016477,GO:0030335,GO:0061098,GO:0090527,GO:1900026	cytoplasm|cytoskeleton|focal adhesion|cell adhesion|cell migration|positive regulation of cell migration|positive regulation of protein tyrosine kinase activity|actin filament reorganization|positive regulation of substrate adhesion-dependent cell spreading
CASTOR1	595.381	873.996	316.766	0.362531	-1.46382	8.80006e-29	3.39681e-28	Down	4.30778	5.01142	5.41678	12.1737	12.0943	14.0597	GeneID:101122727	cytosolic arginine sensor for mTORC1 subunit 1	GO:0005829,GO:0034618,GO:0042802,GO:0061700,GO:1902531,GO:1903577,GO:1904262	cytosol|arginine binding|identical protein binding|GATOR2 complex|regulation of intracellular signal transduction|cellular response to L-arginine|negative regulation of TORC1 signaling	oas04150	mTOR signaling pathway
CATSPER2	24.4713	12.1686	36.7739	3.01804	1.59361	0.00656266	0.00912193	Up	0.526758	0.439865	0.139674	0.188588	0.0746761	0.0850119	GeneID:101109215	cation channel sperm associated 2	GO:0005227,GO:0005244,GO:0005262,GO:0005886,GO:0007275,GO:0009566,GO:0030317,GO:0031514,GO:0034765,GO:0035036,GO:0036128,GO:0048240	calcium activated cation channel activity|voltage-gated ion channel activity|calcium channel activity|plasma membrane|multicellular organism development|fertilization|flagellated sperm motility|motile cilium|regulation of ion transmembrane transport|sperm-egg recognition|CatSper complex|sperm capacitation
CATSPER3	3.76985	6.54445	0.995251	0.151589	-2.72176	0.0459629	0.059128	Down	0.0204286	0.041096	0	0.13567	0.191864	0.0582453	GeneID:101104315	cation channel sperm associated 3	GO:0001669,GO:0005245,GO:0005783,GO:0005886,GO:0006814,GO:0007275,GO:0030317,GO:0031514,GO:0034765,GO:0035036,GO:0036128,GO:0048240	acrosomal vesicle|voltage-gated calcium channel activity|endoplasmic reticulum|plasma membrane|sodium ion transport|multicellular organism development|flagellated sperm motility|motile cilium|regulation of ion transmembrane transport|sperm-egg recognition|CatSper complex|sperm capacitation
CATSPERG	635.049	419.714	850.385	2.02585	1.01853	1.75195e-21	5.27076e-21	Up	3.10628	3.10291	2.98924	1.51583	1.42353	1.35237	GeneID:101111312	cation channel sperm associated auxiliary subunit gamma	GO:0005886,GO:0007275,GO:0007283,GO:0030154,GO:0031514,GO:0035036,GO:0036128,GO:0097228	plasma membrane|multicellular organism development|spermatogenesis|cell differentiation|motile cilium|sperm-egg recognition|CatSper complex|sperm principal piece
CAV1	3479.93	1834.05	5125.82	2.79431	1.48249	1.11782e-60	1.1851e-59	Up	208.561	216.082	212.068	80.578	73.8826	61.1805	GeneID:445468	caveolin 1	GO:0000139,GO:0005768,GO:0005901,GO:0030512,GO:0031295,GO:0031623,GO:0045121,GO:0070836	Golgi membrane|endosome|caveola|negative regulation of transforming growth factor beta receptor signaling pathway|T cell costimulation|receptor internalization|membrane raft|caveola assembly	oas04144,oas04510,oas05100,oas05205,oas05416,oas05418	Endocytosis|Focal adhesion|Bacterial invasion of epithelial cells|Proteoglycans in cancer|Viral myocarditis|Fluid shear stress and atherosclerosis
CAV2	955.426	381.565	1529.29	4.0105	2.00378	3.93232e-69	5.15429e-68	Up	13.1459	13.7421	13.7143	3.20521	2.77839	3.56845	GeneID:100126571	caveolin 2	GO:0000139,GO:0001937,GO:0005901,GO:0006906,GO:0007005,GO:0007029,GO:0031234,GO:0031748,GO:0048278,GO:0048471,GO:0048741,GO:0060161,GO:0070836	Golgi membrane|negative regulation of endothelial cell proliferation|caveola|vesicle fusion|mitochondrion organization|endoplasmic reticulum organization|extrinsic component of cytoplasmic side of plasma membrane|D1 dopamine receptor binding|vesicle docking|perinuclear region of cytoplasm|skeletal muscle fiber development|positive regulation of dopamine receptor signaling pathway|caveola assembly	oas04144,oas04510,oas05100,oas05205,oas05418	Endocytosis|Focal adhesion|Bacterial invasion of epithelial cells|Proteoglycans in cancer|Fluid shear stress and atherosclerosis
CAVIN2	41.5062	11.6164	71.3961	6.16433	2.62394	4.10216e-10	8.15187e-10	Up	0.487057	0.453344	0.634857	0.0896597	0.0477924	0.103633	GeneID:101118507	caveolae associated protein 2	GO:0001786,GO:0005080,GO:0005654,GO:0005737,GO:0005829,GO:0005901,GO:0015629,GO:0097320	phosphatidylserine binding|protein kinase C binding|nucleoplasm|cytoplasm|cytosol|caveola|actin cytoskeleton|plasma membrane tubulation
CAVIN3	7712.26	11452.4	3972.14	0.346854	-1.5276	1.63863e-53	1.40456e-52	Down	102.743	101.736	116.558	276.028	268.122	328.204	GeneID:101110967	caveolae associated protein 3	GO:0005080,GO:0005737,GO:0005829,GO:0005901,GO:0030866,GO:0032922,GO:0032991,GO:0051898,GO:0070374,GO:1901003	protein kinase C binding|cytoplasm|cytosol|caveola|cortical actin cytoskeleton organization|circadian regulation of gene expression|protein-containing complex|negative regulation of protein kinase B signaling|positive regulation of ERK1 and ERK2 cascade|negative regulation of fermentation
CAVIN4	60.5153	36.7572	84.2734	2.28894	1.19468	0.000413197	0.000623876	Up	0.578086	0.573607	0.846908	0.355755	0.300816	0.170762	GeneID:101122919	caveolae associated protein 4	GO:0005737,GO:0005829,GO:0005886,GO:0005901,GO:0007517,GO:0030018,GO:0030154,GO:0035023,GO:0042383,GO:0045944	cytoplasm|cytosol|plasma membrane|caveola|muscle organ development|Z disc|cell differentiation|regulation of Rho protein signal transduction|sarcolemma|positive regulation of transcription by RNA polymerase II
CBARP	383.439	521.857	245.021	0.469627	-1.09041	5.19901e-15	1.23891e-14	Down	1.96074	1.71698	2.03768	3.99769	3.5025	3.99001	GeneID:101113676	CACN subunit beta associated regulatory protein	GO:0005886,GO:0016021,GO:0030054,GO:0030141,GO:0030426,GO:0030672,GO:0044325,GO:0045955,GO:1901386,GO:1903170	plasma membrane|integral component of membrane|cell junction|secretory granule|growth cone|synaptic vesicle membrane|ion channel binding|negative regulation of calcium ion-dependent exocytosis|negative regulation of voltage-gated calcium channel activity|negative regulation of calcium ion transmembrane transport
CBFB	1377.16	687.171	2067.15	3.00747	1.58855	7.55225e-65	8.87876e-64	Up	18.2929	19.0364	18.5684	5.77663	6.4804	5.3122	GeneID:101106455	core-binding factor subunit beta
CBLL1	510.176	296.73	723.622	2.43859	1.28605	1.27575e-24	4.27151e-24	Up	4.80556	4.88064	4.96456	1.70338	2.13758	1.8332	GeneID:101104902	Cbl proto-oncogene like 1	GO:0005634,GO:0005737,GO:0007162,GO:0007275,GO:0016567,GO:0016607,GO:0030335,GO:0036396,GO:0042802,GO:0045807,GO:0046872,GO:0061630,GO:0080009,GO:0098609	nucleus|cytoplasm|negative regulation of cell adhesion|multicellular organism development|protein ubiquitination|nuclear speck|positive regulation of cell migration|RNA N6-methyladenosine methyltransferase complex|identical protein binding|positive regulation of endocytosis|metal ion binding|ubiquitin protein ligase activity|mRNA methylation|cell-cell adhesion
CBR4	395.642	255.564	535.72	2.09497	1.06693	1.19889e-14	2.82128e-14	Up	3.98748	3.80358	4.16514	1.96833	1.9347	1.49629	GeneID:101122167	carbonyl reductase 4	GO:0003955,GO:0005759,GO:0006633,GO:0008753,GO:0044597,GO:0044598,GO:0047025,GO:0048038,GO:0051289,GO:0051290,GO:0055114,GO:0070402,GO:1990204	NAD(P)H dehydrogenase (quinone) activity|mitochondrial matrix|fatty acid biosynthetic process|NADPH dehydrogenase (quinone) activity|daunorubicin metabolic process|doxorubicin metabolic process|3-oxoacyl-[acyl-carrier-protein] reductase (NADH) activity|quinone binding|protein homotetramerization|protein heterotetramerization|oxidation-reduction process|NADPH binding|oxidoreductase complex	oas00061	Fatty acid biosynthesis
CBS	2787.89	3745.26	1830.51	0.488779	-1.03275	2.31293e-38	1.227e-37	Down	18.6931	19.0639	17.7704	35.0524	35.2257	36.9763	GeneID:101106301	cystathionine-beta-synthase	GO:0004122,GO:0004124,GO:0005634,GO:0005737,GO:0006535,GO:0019343,GO:0020037,GO:0030170,GO:0046872	cystathionine beta-synthase activity|cysteine synthase activity|nucleus|cytoplasm|cysteine biosynthetic process from serine|cysteine biosynthetic process via cystathionine|heme binding|pyridoxal phosphate binding|metal ion binding	oas00260,oas00270	Glycine, serine and threonine metabolism|Cysteine and methionine metabolism
CBX1	1027.09	631.936	1422.24	2.25003	1.16994	4.43017e-28	1.66196e-27	Up	18.5654	15.8858	16.422	7.63189	7.42215	6.33357	GeneID:101116158	chromobox 1
CBX2	424.377	684.994	163.76	0.239073	-2.06448	3.76338e-51	3.00031e-50	Down	0.994961	1.01241	0.865198	3.6167	3.81935	3.90885	GeneID:101111469	chromobox 2	GO:0000122,GO:0000791,GO:0000792,GO:0003677,GO:0003682,GO:0005634,GO:0005654,GO:0006325,GO:0030154,GO:0031519,GO:0035064,GO:0035102,GO:0045137	negative regulation of transcription by RNA polymerase II|euchromatin|heterochromatin|DNA binding|chromatin binding|nucleus|nucleoplasm|chromatin organization|cell differentiation|PcG protein complex|methylated histone binding|PRC1 complex|development of primary sexual characteristics
CBX3	1114.36	554.289	1674.43	3.02069	1.59488	8.10955e-29	3.13456e-28	Up	22.8332	24.7564	24.7207	9.75098	5.85588	7.03505	GeneID:101106931	chromobox 3	GO:0000779,GO:0000785,GO:0005635,GO:0005719,GO:0005720,GO:0005819,GO:0006325,GO:0006974,GO:0019904,GO:0031618,GO:0045892,GO:0048511,GO:0090734	condensed chromosome, centromeric region|chromatin|nuclear envelope|nuclear euchromatin|nuclear heterochromatin|spindle|chromatin organization|cellular response to DNA damage stimulus|protein domain specific binding|nuclear pericentric heterochromatin|negative regulation of transcription, DNA-templated|rhythmic process|site of DNA damage
CBX5	7825.83	5045.83	10605.8	2.10175	1.07159	1.8606e-22	5.78721e-22	Up	33.3469	32.7463	31.7519	15.4105	17.2237	11.4652	GeneID:100307036	chromobox 5	GO:0000118,GO:0000122,GO:0000776,GO:0000784,GO:0003682,GO:0005634,GO:0005635,GO:0005654,GO:0005720,GO:0005721,GO:0005730,GO:0006974,GO:0007596,GO:0010369,GO:0016032,GO:0017053,GO:0030674,GO:0031618,GO:0032991,GO:0035064,GO:0035097,GO:0042802,GO:0042803,GO:0042826,GO:0043021,GO:0044877,GO:0045892,GO:0070317,GO:0070491,GO:0090734,GO:1990904	histone deacetylase complex|negative regulation of transcription by RNA polymerase II|kinetochore|nuclear chromosome, telomeric region|chromatin binding|nucleus|nuclear envelope|nucleoplasm|nuclear heterochromatin|pericentric heterochromatin|nucleolus|cellular response to DNA damage stimulus|blood coagulation|chromocenter|viral process|transcriptional repressor complex|protein binding, bridging|n…
CBX6	1986.67	2669.73	1303.6	0.488321	-1.0341	5.00521e-33	2.22957e-32	Down	5.79806	6.08532	5.58948	11.2701	10.7707	11.739	GeneID:101122432	chromobox 6	GO:0000122,GO:0000792,GO:0003727,GO:0005634,GO:0005886,GO:0006325,GO:0009898,GO:0030175,GO:0030425,GO:0030426,GO:0031175,GO:0031519,GO:0043025	negative regulation of transcription by RNA polymerase II|heterochromatin|single-stranded RNA binding|nucleus|plasma membrane|chromatin organization|cytoplasmic side of plasma membrane|filopodium|dendrite|growth cone|neuron projection development|PcG protein complex|neuronal cell body
CBX7	324.248	459.321	189.176	0.41197	-1.27939	1.10999e-17	2.91145e-17	Down	0.812835	0.732167	0.775339	1.81859	1.59139	1.90629	GeneID:101122687	chromobox 7
CC2D1A	1113.82	1527.47	700.158	0.458402	-1.12532	1.05781e-33	4.81358e-33	Down	5.41744	4.9417	5.16655	10.4044	10.8971	10.6865	GeneID:101119902	coiled-coil and C2 domain containing 1A	GO:0000122,GO:0000978,GO:0001078,GO:0001650,GO:0005634,GO:0005815,GO:0005829,GO:0005886,GO:0016020,GO:0043123,GO:0045296,GO:0070062	negative regulation of transcription by RNA polymerase II|RNA polymerase II proximal promoter sequence-specific DNA binding|proximal promoter DNA-binding transcription repressor activity, RNA polymerase II-specific|fibrillar center|nucleus|microtubule organizing center|cytosol|plasma membrane|membrane|positive regulation of I-kappaB kinase/NF-kappaB signaling|cadherin binding|extracellular exosome
CC2D2B	1301.28	590.969	2011.59	3.40529	1.76778	6.10874e-74	8.89762e-73	Up	4.1908	4.07695	4.07277	1.12257	1.06568	1.23216	GeneID:101107489	coiled-coil and C2 domain containing 2B	GO:0005524,GO:0016021,GO:0102485,GO:0102486,GO:0102487,GO:0102488,GO:0102489,GO:0102490,GO:0102491	ATP binding|integral component of membrane|dATP phosphohydrolase activity|dCTP phosphohydrolase activity|dUTP phosphohydrolase activity|dTTP phosphohydrolase activity|GTP phosphohydrolase activity|8-oxo-dGTP phosphohydrolase activity|dGTP phosphohydrolase activity	oas00230,oas00240,oas05169	Purine metabolism|Pyrimidine metabolism|Epstein-Barr virus infection
CCAR1	2209.34	433.486	3985.19	9.19506	3.20086	2.26406e-157	1.42949e-155	Up	23.6304	23.4916	25.2405	2.96424	1.94503	2.52568	GeneID:101106390	cell division cycle and apoptosis regulator 1	GO:0000398,GO:0000980,GO:0003713,GO:0003714,GO:0003723,GO:0005634,GO:0005654,GO:0006355,GO:0006915,GO:0007049,GO:0008284,GO:0030335,GO:0030374,GO:0048471	mRNA splicing, via spliceosome|RNA polymerase II distal enhancer sequence-specific DNA binding|transcription coactivator activity|transcription corepressor activity|RNA binding|nucleus|nucleoplasm|regulation of transcription, DNA-templated|apoptotic process|cell cycle|positive regulation of cell proliferation|positive regulation of cell migration|nuclear receptor transcription coactivator activit…
CCDC106	352.324	525.025	179.623	0.342146	-1.54732	1.45203e-25	5.00758e-25	Down	2.18658	1.80624	1.76017	4.97079	5.4565	5.45126	GeneID:101117695	coiled-coil domain containing 106	GO:0005634,GO:0005829	nucleus|cytosol
CCDC107	388.019	534.709	241.329	0.451507	-1.14718	6.25545e-11	1.28405e-10	Down	7.46062	7.37141	9.34474	17.4137	13.1148	19.9224	GeneID:101116205	coiled-coil domain containing 107	GO:0016021	integral component of membrane
CCDC112	114.697	29.2407	200.154	6.82966	2.77181	2.11836e-22	6.57594e-22	Up	2.9382	2.40437	2.21205	0.519722	0.292325	0.236647	GeneID:101123303	coiled-coil domain containing 112
CCDC116	7.46966	12.624	2.31536	0.183597	-2.44538	0.00979973	0.0134561	Down	0.0455043	0.0114426	0.0228389	0.151102	0.0747906	0.183799	GeneID:101116259	coiled-coil domain containing 116	GO:0005737,GO:0005813	cytoplasm|centrosome
CCDC117	1734.67	343.019	3126.33	9.10822	3.18717	2.22274e-237	6.83395e-235	Up	23.9175	22.4846	23.5348	2.63091	2.54209	2.08875	GeneID:101106715	coiled-coil domain containing 117
CCDC121	65.0006	33.4266	96.5746	2.89198	1.53206	7.88791e-07	1.37084e-06	Up	0.939593	1.2678	1.15021	0.271778	0.408946	0.41382	GeneID:101112804	coiled-coil domain containing 121
CCDC124	1909.09	2731.47	1086.7	0.397878	-1.3296	8.81543e-37	4.44163e-36	Down	29.8488	31.5448	27.6306	66.1713	66.4187	78.4292	GeneID:101110586	coiled-coil domain containing 124	GO:0005815,GO:0005829,GO:0005886,GO:0007049,GO:0030496,GO:0051301	microtubule organizing center|cytosol|plasma membrane|cell cycle|midbody|cell division
CCDC125	20.3662	6.66162	34.0707	5.13765	2.36111	3.78154e-05	6.06031e-05	Up	0.233535	0.192739	0.192349	0.0397681	0.0168719	0.0569101	GeneID:101119672	coiled-coil domain containing 125	GO:0005737,GO:0035024,GO:0090630,GO:2000146	cytoplasm|negative regulation of Rho protein signal transduction|activation of GTPase activity|negative regulation of cell motility
CCDC126	54.3561	26.3527	82.3595	3.12347	1.64315	8.84275e-05	0.000138866	Up	0.842131	0.990062	0.900232	0.103762	0.482773	0.239066	GeneID:101110932	coiled-coil domain containing 126	GO:0005576	extracellular region
CCDC130	334.122	446.667	221.578	0.496189	-1.01104	3.00317e-11	6.24708e-11	Down	4.26449	3.46989	3.91531	6.61161	7.6522	7.89168	GeneID:101102978	coiled-coil domain containing 130
CCDC138	310.682	193.252	428.112	2.21563	1.14772	3.38467e-13	7.54562e-13	Up	3.95508	5.00258	3.88082	1.88556	1.73657	1.85124	GeneID:101109087	coiled-coil domain containing 138
CCDC14	111.496	38.8403	184.152	4.75303	2.24885	9.97836e-18	2.62117e-17	Up	1.42159	1.22455	1.57882	0.229571	0.241464	0.366513	GeneID:101120380	coiled-coil domain containing 14	GO:0005813,GO:0021762,GO:0034451,GO:0071539	centrosome|substantia nigra development|centriolar satellite|protein localization to centrosome
CCDC148	5.61548	1.31589	9.91506	7.51976	2.91069	0.0090691	0.0124746	Up	0.106237	0.0534288	0.106641	0.0167986	0.00831475	0.00841385	GeneID:101112454	coiled-coil domain containing 148
CCDC15	239.904	107.672	372.137	3.46232	1.79174	1.26739e-17	3.31569e-17	Up	1.66897	1.70509	1.55691	0.373057	0.35289	0.614537	GeneID:101117460	coiled-coil domain containing 15	GO:0005813	centrosome
CCDC150	23.6617	1.99895	45.3244	22.8395	4.51346	9.15946e-10	1.7962e-09	Up	0.381557	0.505476	0.392353	0.0264878	0	0.0265338	GeneID:101123103	coiled-coil domain containing 150
CCDC157	85.4949	126.018	44.9717	0.35685	-1.48661	4.25254e-08	7.80984e-08	Down	0.243369	0.28763	0.299263	0.617644	0.891427	0.688104	GeneID:101123238	coiled-coil domain containing 157
CCDC162P	11.7557	2.66475	20.8467	7.86575	2.97559	0.000167023	0.000257995	Up	0.0517433	0.0437184	0.0353195	0.00589094	0.00194388	0.00786821	GeneID:101108397	coiled-coil domain containing 162, pseudogene
CCDC166	3.78948	6.91817	0.660786	0.0955487	-3.38762	0.020032	0.0267478	Down	0	0.0183345	0.0182974	0.0864682	0.171196	0.103942	GeneID:101112490	coiled-coil domain containing 166
CCDC167	845.149	1143.98	546.313	0.477616	-1.06608	9.35331e-23	2.93899e-22	Down	22.7193	26.6916	26.8223	51.1817	47.6431	51.8388	GeneID:101123505	coiled-coil domain containing 167	GO:0016021	integral component of membrane
CCDC168	2.80772	0.324532	5.29091	14.9088	3.89809	0.022507	0.0299254	Up	0.00336726	0.00790287	0.00676019	0	0.00105417	0	GeneID:114116677	coiled-coil domain containing 168
CCDC171	77.2381	10.3162	144.16	14.0536	3.81287	5.36084e-26	1.87345e-25	Up	0.432437	0.428706	0.499666	0.0265644	0.0204533	0.0443508	GeneID:101122165	coiled-coil domain containing 171
CCDC173	8.41784	1.63991	15.1958	9.2297	3.20628	0.000926906	0.0013694	Up	0.0426501	0.0506992	0.0856252	0.00367854	0.0109246	0.00368493	GeneID:101119534	coiled-coil domain containing 173
CCDC18	42.8382	5.5724	80.1041	14.3077	3.83872	7.59458e-14	1.73494e-13	Up	0.5885	0.452331	0.306517	0.0526732	0.0208572	0.0158294	GeneID:101117639	coiled-coil domain containing 18
CCDC184	67.0716	104.697	29.446	0.281231	-1.83017	2.9209e-09	5.62733e-09	Down	0.291805	0.434396	0.316351	0.996654	1.32646	1.17587	GeneID:101107853	coiled-coil domain containing 184	GO:0005737	cytoplasm
CCDC186	992.519	72.2013	1912.84	26.4886	4.7273	1.29152e-37	6.6835e-37	Up	7.88682	7.48412	7.95319	0.42714	0.162341	0.244503	GeneID:101101940	coiled-coil domain containing 186
CCDC187	94.2112	130.235	58.1875	0.446944	-1.16183	8.85896e-06	1.46902e-05	Down	0.251239	0.340606	0.372812	0.766903	0.559129	0.711135	GeneID:105607222	coiled-coil domain containing 187	GO:0005813,GO:0008017,GO:0034453	centrosome|microtubule binding|microtubule anchoring
CCDC191	81.4073	26.8508	135.964	5.07407	2.34314	4.80249e-16	1.19202e-15	Up	0.91156	0.99779	0.85448	0.1399	0.163673	0.210214	GeneID:101116278	coiled-coil domain containing 191
CCDC22	650.783	949.639	351.926	0.370666	-1.43181	8.15088e-33	3.60582e-32	Down	4.347	4.12425	4.06873	10.1099	10.1736	11.6348	GeneID:101104125	coiled-coil domain containing 22	GO:0005654,GO:0005768,GO:0005829,GO:0006878,GO:0006893,GO:0007253,GO:0015031,GO:0043123,GO:0043124,GO:0043687,GO:0097602,GO:2000060	nucleoplasm|endosome|cytosol|cellular copper ion homeostasis|Golgi to plasma membrane transport|cytoplasmic sequestering of NF-kappaB|protein transport|positive regulation of I-kappaB kinase/NF-kappaB signaling|negative regulation of I-kappaB kinase/NF-kappaB signaling|post-translational protein modification|cullin family protein binding|positive regulation of ubiquitin-dependent protein cataboli…
CCDC30	19.4945	4.93802	34.0509	6.88492	2.78344	2.5591e-06	4.34702e-06	Up	0.178405	0.13957	0.194008	0.0282101	0.0232718	0.0188393	GeneID:101102114	coiled-coil domain containing 30
CCDC34	307.614	104.992	510.236	4.86019	2.28101	3.02357e-41	1.77216e-40	Up	7.92521	7.93959	8.72067	1.95886	1.2679	1.55471	GeneID:101116505	coiled-coil domain containing 34
CCDC36	2.48484	0	4.96969	27.2683	4.76915	0.00900702	0.0123953	Up	0.0423359	0.0496805	0.0141657	0	0	0	GeneID:101105694	coiled-coil domain containing 36	GO:0000794,GO:0006310,GO:0007129,GO:0007283,GO:0042138,GO:0048477,GO:0060629	condensed nuclear chromosome|DNA recombination|synapsis|spermatogenesis|meiotic DNA double-strand break formation|oogenesis|regulation of homologous chromosome segregation
CCDC43	675.87	235.726	1116.01	4.73212	2.24249	1.75663e-81	3.0114e-80	Up	14.0894	13.5429	13.057	3.03385	2.67589	2.42215	GeneID:101117433	coiled-coil domain containing 43	GO:0005829	cytosol
CCDC47	1973.68	1099.86	2847.49	2.58878	1.37227	2.87952e-66	3.53823e-65	Up	23.924	23.154	22.6774	8.51358	8.86788	8.08313	GeneID:101103333	coiled-coil domain containing 47	GO:0005509,GO:0005783,GO:0016021	calcium ion binding|endoplasmic reticulum|integral component of membrane
CCDC50	1269.26	657.995	1880.53	2.85771	1.51486	9.73942e-69	1.2672e-67	Up	6.20359	6.40414	6.40792	2.15057	2.14459	1.99273	GeneID:101104368	coiled-coil domain containing 50	GO:0005829,GO:0007605,GO:0031625	cytosol|sensory perception of sound|ubiquitin protein ligase binding
CCDC59	192.042	125.102	258.982	2.0689	1.04886	1.2288e-06	2.11706e-06	Up	5.51167	6.74193	6.09532	3.8554	2.30312	2.24179	GeneID:101106509	coiled-coil domain containing 59	GO:0005634	nucleus
CCDC61	361.03	502.108	219.952	0.438139	-1.19054	4.00373e-17	1.02917e-16	Down	1.21255	1.07675	1.09495	2.24304	2.48254	2.56517	GeneID:101120433	coiled-coil domain containing 61	GO:0005813	centrosome
CCDC62	80.3365	26.0683	134.605	5.16255	2.36808	8.92954e-17	2.26652e-16	Up	1.08583	1.23086	1.20242	0.188048	0.250905	0.204754	GeneID:101123584	coiled-coil domain containing 62	GO:0001835,GO:0005634,GO:0005654,GO:0005737,GO:0005886,GO:0030331,GO:0030374,GO:0045944,GO:0071392	blastocyst hatching|nucleus|nucleoplasm|cytoplasm|plasma membrane|estrogen receptor binding|nuclear receptor transcription coactivator activity|positive regulation of transcription by RNA polymerase II|cellular response to estradiol stimulus
CCDC66	157.139	15.2913	298.987	19.5784	4.29119	1.10651e-10	2.24976e-10	Up	2.69296	2.40492	2.50953	0.175104	0.0236375	0.167435	GeneID:101104693	coiled-coil domain containing 66	GO:0001578,GO:0001750,GO:0001895,GO:0001917,GO:0005813,GO:0005874,GO:0005929,GO:0008017,GO:0034451,GO:0036064,GO:0042803,GO:0046548,GO:0060271,GO:1903564	microtubule bundle formation|photoreceptor outer segment|retina homeostasis|photoreceptor inner segment|centrosome|microtubule|cilium|microtubule binding|centriolar satellite|ciliary basal body|protein homodimerization activity|retinal rod cell development|cilium assembly|regulation of protein localization to cilium
CCDC69	653.294	879.563	427.025	0.485496	-1.04247	9.49421e-18	2.49585e-17	Down	2.0531	2.71666	2.34196	4.70301	4.59897	4.53378	GeneID:101111284	coiled-coil domain containing 69	GO:0005634,GO:0005737,GO:0008017,GO:0030496,GO:0051233,GO:0051255	nucleus|cytoplasm|microtubule binding|midbody|spindle midzone|spindle midzone assembly
CCDC71	977.157	1500.04	454.27	0.302892	-1.72312	1.72473e-40	9.83982e-40	Down	6.47285	4.97565	6.68241	17.1626	18.6827	20.6058	GeneID:101105954	coiled-coil domain containing 71	GO:0044255,GO:0045600	cellular lipid metabolic process|positive regulation of fat cell differentiation
CCDC74B	80.2305	121.109	39.3519	0.324927	-1.62181	7.07567e-10	1.39353e-09	Down	0.596443	0.648573	0.679624	1.91173	1.90763	1.77716	GeneID:105602964	coiled-coil domain containing 74B
CCDC77	229.817	149.127	310.507	2.08193	1.05792	1.76785e-08	3.29851e-08	Up	2.4178	2.76826	2.89176	0.98425	1.52191	1.15707	GeneID:101120068	coiled-coil domain containing 77	GO:0005813,GO:0016020	centrosome|membrane
CCDC81	5.94934	0.324532	11.5741	32.6137	5.02741	0.000531549	0.000796782	Up	0.101526	0.0785535	0.0940736	0	0.00733484	0	GeneID:101113447	coiled-coil domain containing 81	GO:0005737,GO:0005813	cytoplasm|centrosome
CCDC82	365.079	59.4408	670.718	11.2861	3.49647	5.97529e-84	1.059e-82	Up	2.94389	2.36888	2.6185	0.270052	0.175781	0.21864	GeneID:101123145	coiled-coil domain containing 82
CCDC85B	336.54	520.874	152.207	0.292263	-1.77466	1.48753e-22	4.64009e-22	Down	2.09483	3.01908	2.10281	7.44553	6.84203	8.98877	GeneID:101103437	coiled-coil domain containing 85B	GO:0005634,GO:0005737,GO:0005813,GO:0030154,GO:0030308,GO:0045599,GO:0045892	nucleus|cytoplasm|centrosome|cell differentiation|negative regulation of cell growth|negative regulation of fat cell differentiation|negative regulation of transcription, DNA-templated
CCDC85C	182.008	242.962	121.055	0.498365	-1.00473	4.94246e-08	9.0569e-08	Down	0.815286	0.726152	0.743425	1.28719	1.51389	1.52602	GeneID:105603308	coiled-coil domain containing 85C	GO:0005923,GO:0021987,GO:0043296	bicellular tight junction|cerebral cortex development|apical junction complex
CCDC86	1695.92	2562.99	828.846	0.323424	-1.6285	5.58708e-63	6.27626e-62	Down	10.887	11.9225	11.4066	32.7428	31.084	35.9812	GeneID:101121127	coiled-coil domain containing 86	GO:0005634	nucleus
CCDC87	28.1321	49.3065	6.95764	0.140895	-2.82731	1.37747e-07	2.47543e-07	Down	0.059205	0.0935802	0.0254703	0.377144	0.53222	0.289377	GeneID:101106215	coiled-coil domain containing 87	GO:0007283,GO:0007338,GO:0030154,GO:1905516,GO:2000344	spermatogenesis|single fertilization|cell differentiation|positive regulation of fertilization|positive regulation of acrosome reaction
CCDC88A	1326.92	172.746	2481.09	14.3808	3.84608	7.80662e-134	3.2378e-132	Up	9.25256	8.72724	9.11435	0.662643	0.385469	0.728803	GeneID:101122010	coiled-coil domain containing 88A	GO:0001932,GO:0003779,GO:0005737,GO:0005783,GO:0005794,GO:0005813,GO:0005814,GO:0005829,GO:0005886,GO:0006260,GO:0006275,GO:0008017,GO:0010975,GO:0016020,GO:0016477,GO:0030027,GO:0030032,GO:0030705,GO:0031122,GO:0031410,GO:0031929,GO:0032148,GO:0032956,GO:0035091,GO:0036064,GO:0042127,GO:0042803,GO:0043422,GO:0045724,GO:0051959,GO:0061024,GO:1903566	regulation of protein phosphorylation|actin binding|cytoplasm|endoplasmic reticulum|Golgi apparatus|centrosome|centriole|cytosol|plasma membrane|DNA replication|regulation of DNA replication|microtubule binding|regulation of neuron projection development|membrane|cell migration|lamellipodium|lamellipodium assembly|cytoskeleton-dependent intracellular transport|cytoplasmic microtubule organization…
CCDC89	51.6154	13.2426	89.9882	6.80492	2.76658	1.03683e-11	2.19485e-11	Up	0.860942	1.00374	0.805298	0.185639	0.0459428	0.139471	GeneID:101104101	coiled-coil domain containing 89	GO:0005634,GO:0005737	nucleus|cytoplasm
CCDC91	203.607	57.3414	349.873	6.11347	2.61199	5.83532e-38	3.05437e-37	Up	3.97106	3.33912	3.83855	0.498349	0.522933	0.698899	GeneID:101109260	coiled-coil domain containing 91	GO:0005802,GO:0005829,GO:0015031,GO:0016020,GO:0090160	trans-Golgi network|cytosol|protein transport|membrane|Golgi to lysosome transport
CCDC92	259.957	347.944	171.97	0.494344	-1.01641	6.70392e-11	1.37491e-10	Down	1.02962	0.900555	0.988607	1.74664	1.90775	1.91986	GeneID:101116427	coiled-coil domain containing 92	GO:0005654,GO:0005813,GO:0005814,GO:0043231	nucleoplasm|centrosome|centriole|intracellular membrane-bounded organelle
CCDC93	965.34	591.999	1338.68	2.26081	1.17684	2.43947e-31	1.03236e-30	Up	5.80521	5.39776	5.14033	2.4139	2.33289	2.08904	GeneID:101110305	coiled-coil domain containing 93	GO:0005769,GO:0006893,GO:0015031,GO:0043231	early endosome|Golgi to plasma membrane transport|protein transport|intracellular membrane-bounded organelle
CCDC97	1692.59	2303.83	1081.35	0.469381	-1.09117	3.93396e-38	2.07218e-37	Down	9.19582	9.48416	8.63721	18.1602	18.3451	18.4609	GeneID:101102506	coiled-coil domain containing 97	GO:0005686	U2 snRNP
CCHCR1	443.112	604.036	282.189	0.467244	-1.09775	7.51331e-17	1.91185e-16	Down	2.51612	2.59129	2.24124	4.79875	4.77465	5.27227	GeneID:101104535	coiled-coil alpha-helical rod protein 1	GO:0005634,GO:0005814,GO:0005829,GO:0006611,GO:0007275,GO:0030154,GO:0042802	nucleus|centriole|cytosol|protein export from nucleus|multicellular organism development|cell differentiation|identical protein binding
CCM2	3584.48	5267.24	1901.73	0.361069	-1.46965	2.12586e-70	2.86616e-69	Down	23.4648	24.4952	24.1945	59.2745	62.5898	66.6881	GeneID:101114100	CCM2 scaffold protein	GO:0001568,GO:0001570,GO:0001701,GO:0001885,GO:0001944,GO:0005737,GO:0005739,GO:0007507,GO:0032991,GO:0035264,GO:0045216,GO:0048839,GO:0048845,GO:0060039,GO:0060837,GO:0061154	blood vessel development|vasculogenesis|in utero embryonic development|endothelial cell development|vasculature development|cytoplasm|mitochondrion|heart development|protein-containing complex|multicellular organism growth|cell-cell junction organization|inner ear development|venous blood vessel morphogenesis|pericardium development|blood vessel endothelial cell differentiation|endothelial tube m…
CCN5	58.5828	90.0358	27.1299	0.301421	-1.73015	1.56983e-07	2.81502e-07	Down	0.489172	0.337393	0.322681	1.00776	1.22077	1.36815	GeneID:101106613	cellular communication network factor 5
CCNB1IP1	22.6608	0	45.3216	248.726	7.95841	2.75384e-10	5.51354e-10	Up	0.68423	0.558375	0.531327	0	0	0	GeneID:101115966	cyclin B1 interacting protein 1	GO:0000795,GO:0001825,GO:0007131,GO:0007286,GO:0016567,GO:0016740,GO:0046872,GO:0051026	synaptonemal complex|blastocyst formation|reciprocal meiotic recombination|spermatid development|protein ubiquitination|transferase activity|metal ion binding|chiasma assembly
CCNB3	462.449	220.725	704.173	3.19247	1.67467	8.98021e-32	3.84172e-31	Up	4.29234	4.56627	4.35216	1.07383	1.36508	1.46365	GeneID:101102288	cyclin B3	GO:0000079,GO:0000278,GO:0000307,GO:0005634,GO:0005737,GO:0005813,GO:0006468,GO:0007088,GO:0008284,GO:0010389,GO:0016538,GO:0019901,GO:0045787,GO:0051301,GO:0051321	regulation of cyclin-dependent protein serine/threonine kinase activity|mitotic cell cycle|cyclin-dependent protein kinase holoenzyme complex|nucleus|cytoplasm|centrosome|protein phosphorylation|regulation of mitotic nuclear division|positive regulation of cell proliferation|regulation of G2/M transition of mitotic cell cycle|cyclin-dependent protein serine/threonine kinase regulator activity|pro…	oas04068,oas04110,oas04218,oas04914,oas05170	FoxO signaling pathway|Cell cycle|Cellular senescence|Progesterone-mediated oocyte maturation|Human immunodeficiency virus 1 infection
CCNC	944.459	558.731	1330.19	2.38106	1.2516	6.44181e-23	2.03499e-22	Up	7.94779	8.30643	8.30185	3.8164	2.6063	3.31984	GeneID:101102491	cyclin C	GO:0000307,GO:0005634,GO:0016538,GO:0016592,GO:0045737,GO:0045944,GO:1901409	cyclin-dependent protein kinase holoenzyme complex|nucleus|cyclin-dependent protein serine/threonine kinase regulator activity|mediator complex|positive regulation of cyclin-dependent protein serine/threonine kinase activity|positive regulation of transcription by RNA polymerase II|positive regulation of phosphorylation of RNA polymerase II C-terminal domain
CCND3	3550.01	5402.29	1697.73	0.314286	-1.66985	1.87377e-78	2.97761e-77	Down	21.6954	21.7437	23.6344	63.1587	65.593	72.5383	GeneID:100147798	cyclin D3	GO:0000079,GO:0000278,GO:0000307,GO:0005634,GO:0005737,GO:0006468,GO:0007088,GO:0008284,GO:0016020,GO:0016538,GO:0019901,GO:0045787,GO:0051301,GO:1900087	regulation of cyclin-dependent protein serine/threonine kinase activity|mitotic cell cycle|cyclin-dependent protein kinase holoenzyme complex|nucleus|cytoplasm|protein phosphorylation|regulation of mitotic nuclear division|positive regulation of cell proliferation|membrane|cyclin-dependent protein serine/threonine kinase regulator activity|protein kinase binding|positive regulation of cell cycle|…	oas04110,oas04115,oas04151,oas04218,oas04310,oas04390,oas04510,oas04630,oas05162,oas05164,oas05165,oas05166,oas05169,oas05200,oas05203	Cell cycle|p53 signaling pathway|PI3K-Akt signaling pathway|Cellular senescence|Wnt signaling pathway|Hippo signaling pathway|Focal adhesion|Jak-STAT signaling pathway|Measles|Influenza A|Human papillomavirus infection|Human T-cell leukemia virus 1 infection|Epstein-Barr virus infection|Pathways in cancer|Viral carcinogenesis
CCNE2	153.734	86.5829	220.885	2.55173	1.35147	1.36396e-06	2.34707e-06	Up	2.20495	2.14662	2.42657	1.22829	0.427475	0.855528	GeneID:101109811	cyclin E2	GO:0000079,GO:0000082,GO:0000278,GO:0000307,GO:0005634,GO:0005737,GO:0005813,GO:0006468,GO:0007088,GO:0007129,GO:0008284,GO:0016538,GO:0019901,GO:0045787,GO:0051301,GO:0097135	regulation of cyclin-dependent protein serine/threonine kinase activity|G1/S transition of mitotic cell cycle|mitotic cell cycle|cyclin-dependent protein kinase holoenzyme complex|nucleus|cytoplasm|centrosome|protein phosphorylation|regulation of mitotic nuclear division|synapsis|positive regulation of cell proliferation|cyclin-dependent protein serine/threonine kinase regulator activity|protein …	oas04110,oas04114,oas04115,oas04151,oas04218,oas04934,oas05161,oas05162,oas05165,oas05166,oas05169,oas05200,oas05203,oas05206,oas05215,oas05222,oas05226	Cell cycle|Oocyte meiosis|p53 signaling pathway|PI3K-Akt signaling pathway|Cellular senescence|Cushing syndrome|Hepatitis B|Measles|Human papillomavirus infection|Human T-cell leukemia virus 1 infection|Epstein-Barr virus infection|Pathways in cancer|Viral carcinogenesis|MicroRNAs in cancer|Prostate cancer|Small cell lung cancer|Gastric cancer
CCNF	1218.6	1884.61	552.58	0.29323	-1.7699	3.65048e-62	4.03664e-61	Down	2.64697	3.28792	3.29232	9.5022	10.1302	10.0678	GeneID:101116197	cyclin F	GO:0000079,GO:0000278,GO:0000307,GO:0000320,GO:0001890,GO:0005634,GO:0005737,GO:0005813,GO:0005814,GO:0006468,GO:0007088,GO:0008284,GO:0010826,GO:0016538,GO:0016567,GO:0019005,GO:0019901,GO:0030054,GO:0031146,GO:0045787,GO:0051301	regulation of cyclin-dependent protein serine/threonine kinase activity|mitotic cell cycle|cyclin-dependent protein kinase holoenzyme complex|re-entry into mitotic cell cycle|placenta development|nucleus|cytoplasm|centrosome|centriole|protein phosphorylation|regulation of mitotic nuclear division|positive regulation of cell proliferation|negative regulation of centrosome duplication|cyclin-depend…
CCNG1	10236.2	6041.4	14430.9	2.38868	1.25621	9.97012e-35	4.71597e-34	Up	163.155	164.811	173.235	77.9883	55.6768	64.6315	GeneID:101119213	cyclin G1	GO:0000079,GO:0000278,GO:0000307,GO:0005634,GO:0005737,GO:0006468,GO:0007088,GO:0008284,GO:0016538,GO:0019901,GO:0045787,GO:0051301	regulation of cyclin-dependent protein serine/threonine kinase activity|mitotic cell cycle|cyclin-dependent protein kinase holoenzyme complex|nucleus|cytoplasm|protein phosphorylation|regulation of mitotic nuclear division|positive regulation of cell proliferation|cyclin-dependent protein serine/threonine kinase regulator activity|protein kinase binding|positive regulation of cell cycle|cell divi…	oas04115,oas05206	p53 signaling pathway|MicroRNAs in cancer
CCNG2	369.969	136.409	603.528	4.42102	2.14438	8.01624e-51	6.33726e-50	Up	5.76799	5.75327	6.10895	1.38864	1.30232	1.07989	GeneID:101110594	cyclin G2			oas04068,oas04115	FoxO signaling pathway|p53 signaling pathway
CCNH	263.537	157.343	369.731	2.35156	1.23362	5.94441e-10	1.17451e-09	Up	5.60081	5.22062	5.62216	2.54559	1.47342	2.57787	GeneID:101104905	cyclin H	GO:0000307,GO:0005634,GO:0005675,GO:0006366,GO:0006468,GO:0007049,GO:0016538,GO:0045737,GO:0045944,GO:0070985,GO:1901409	cyclin-dependent protein kinase holoenzyme complex|nucleus|transcription factor TFIIH holo complex|transcription by RNA polymerase II|protein phosphorylation|cell cycle|cyclin-dependent protein serine/threonine kinase regulator activity|positive regulation of cyclin-dependent protein serine/threonine kinase activity|positive regulation of transcription by RNA polymerase II|transcription factor TF…	oas03022,oas03420,oas04110	Basal transcription factors|Nucleotide excision repair|Cell cycle
CCNJ	159.617	75.4063	243.828	3.23068	1.69184	1.34729e-14	3.16314e-14	Up	1.52002	1.75188	1.41138	0.396581	0.594834	0.379212	GeneID:101110720	cyclin J	GO:0000079,GO:0000278,GO:0000307,GO:0005634,GO:0005737,GO:0006468,GO:0007088,GO:0008284,GO:0016538,GO:0019901,GO:0045787	regulation of cyclin-dependent protein serine/threonine kinase activity|mitotic cell cycle|cyclin-dependent protein kinase holoenzyme complex|nucleus|cytoplasm|protein phosphorylation|regulation of mitotic nuclear division|positive regulation of cell proliferation|cyclin-dependent protein serine/threonine kinase regulator activity|protein kinase binding|positive regulation of cell cycle
CCNL1	698.253	356.242	1040.26	2.92097	1.54645	5.58466e-43	3.46725e-42	Up	12.0004	13.6217	12.3968	4.14945	3.89269	4.24826	GeneID:101109758	cyclin L1	GO:0000307,GO:0005634,GO:0006396,GO:0016538,GO:0016607,GO:0045737,GO:0045944,GO:1901409	cyclin-dependent protein kinase holoenzyme complex|nucleus|RNA processing|cyclin-dependent protein serine/threonine kinase regulator activity|nuclear speck|positive regulation of cyclin-dependent protein serine/threonine kinase activity|positive regulation of transcription by RNA polymerase II|positive regulation of phosphorylation of RNA polymerase II C-terminal domain
CCNL2	1977.1	1114.84	2839.35	2.54621	1.34835	3.58952e-51	2.86494e-50	Up	18.6317	18.7209	18.7943	7.19932	7.60444	6.05321	GeneID:101106347	cyclin L2	GO:0000307,GO:0005634,GO:0016538,GO:0016607,GO:0045737,GO:0045944,GO:1901409	cyclin-dependent protein kinase holoenzyme complex|nucleus|cyclin-dependent protein serine/threonine kinase regulator activity|nuclear speck|positive regulation of cyclin-dependent protein serine/threonine kinase activity|positive regulation of transcription by RNA polymerase II|positive regulation of phosphorylation of RNA polymerase II C-terminal domain
CCNO	93.5224	125.558	61.4871	0.489882	-1.02949	3.05125e-05	4.9195e-05	Down	1.2199	1.29396	1.62532	2.44101	2.79141	2.74036	GeneID:101115826	cyclin O	GO:0000079,GO:0000278,GO:0000307,GO:0005634,GO:0005737,GO:0006468,GO:0007088,GO:0008284,GO:0016538,GO:0019901,GO:0042493,GO:0045787,GO:0051301,GO:0060271,GO:1903251	regulation of cyclin-dependent protein serine/threonine kinase activity|mitotic cell cycle|cyclin-dependent protein kinase holoenzyme complex|nucleus|cytoplasm|protein phosphorylation|regulation of mitotic nuclear division|positive regulation of cell proliferation|cyclin-dependent protein serine/threonine kinase regulator activity|protein kinase binding|response to drug|positive regulation of cel…
[truncated: 5,610 more rows]
