# Supplementary material for: Molecular Mechanism of m6A Methylation Modification Genes METTL3 and FTO in Regulating Heat Stress in Sheep
Source: Int J Mol Sci. 2023 Jul 25;24(15):11926. doi: 10.3390/ijms241511926 (PMC10419070; doi:10.3390/ijms241511926)
Supplement: Supplementary file 1 [file ijms-24-11926-s001.zip › Supplements Tables S1-S7/Table S3.xlsx]

## Sheet: M3_sR-vs-NC
gene_id	BaseMean_DESeq2	BaseMean_control_NC	BaseMean_case_M3_sR	FoldChange	log2FoldChange	p-value	q-value	Regulation	Expression_M3_sR1	Expression_M3_sR2	Expression_M3_sR3	Expression_NC1	Expression_NC2	Expression_NC3	gene_Dbxref	description	GO_id	GO_term	pathway	pathway_description
ABCA10	93.4023	37.7378	149.067	3.95172	1.98248	3.59803e-13	1.2458e-10	Up	0.79824	0.631739	0.561945	0.204326	0.1941	0.105425	GeneID:101108240	ATP binding cassette subfamily A member 10			oas02010	ABC transporters
ACKR4	9.49101	3.00243	15.9796	5.31693	2.41059	0.00270467	0.0312992	Up	0.0850751	0.245012	0.182822	0.0428434	0.0217693	0.031777	GeneID:101119176	atypical chemokine receptor 4	GO:0004950,GO:0005044,GO:0005769,GO:0006935,GO:0006955,GO:0007204,GO:0009897,GO:0016021,GO:0016493,GO:0019722,GO:0019956,GO:0019957,GO:0055037,GO:0060326	chemokine receptor activity|scavenger receptor activity|early endosome|chemotaxis|immune response|positive regulation of cytosolic calcium ion concentration|external side of plasma membrane|integral component of membrane|C-C chemokine receptor activity|calcium-mediated signaling|chemokine binding|C-C chemokine binding|recycling endosome|cell chemotaxis	oas04060	Cytokine-cytokine receptor interaction
ACTA1	3.65572	0.333632	6.97782	19.4445	4.28129	0.00553987	0.0520476	Up	0.0706598	0.11325	0.11433	0.0142336	0	0	GeneID:101107662	actin alpha 1, skeletal muscle	GO:0001725,GO:0005200,GO:0005524,GO:0005615,GO:0005829,GO:0005865,GO:0005884,GO:0006936,GO:0009612,GO:0009991,GO:0010226,GO:0010628,GO:0015629,GO:0017022,GO:0030017,GO:0030027,GO:0030049,GO:0030175,GO:0030240,GO:0043503,GO:0043531,GO:0044297,GO:0048545,GO:0048741,GO:0070062,GO:0071417,GO:0072562,GO:0090131	stress fiber|structural constituent of cytoskeleton|ATP binding|extracellular space|cytosol|striated muscle thin filament|actin filament|muscle contraction|response to mechanical stimulus|response to extracellular stimulus|response to lithium ion|positive regulation of gene expression|actin cytoskeleton|myosin binding|sarcomere|lamellipodium|muscle filament sliding|filopodium|skeletal muscle thin…
ADIPOQ	15.1289	24.3165	5.94131	0.244698	-2.03092	0.00538711	0.050963	Down	0.144772	0.0659185	0.0266189	0.198836	0.121237	0.642342	GeneID:101111848	adiponectin, C1Q and collagen domain containing	GO:0001934,GO:0005102,GO:0005179,GO:0005581,GO:0005615,GO:0005623,GO:0005783,GO:0006006,GO:0006635,GO:0009617,GO:0009749,GO:0009967,GO:0009986,GO:0010642,GO:0010739,GO:0010745,GO:0010804,GO:0010875,GO:0010906,GO:0019395,GO:0030336,GO:0030853,GO:0031953,GO:0032270,GO:0032720,GO:0032757,GO:0032869,GO:0033034,GO:0033691,GO:0034115,GO:0034383,GO:0034612,GO:0035690,GO:0042593,GO:0042802,GO:0042803,GO:…	positive regulation of protein phosphorylation|signaling receptor binding|hormone activity|collagen trimer|extracellular space|cell|endoplasmic reticulum|glucose metabolic process|fatty acid beta-oxidation|response to bacterium|response to glucose|positive regulation of signal transduction|cell surface|negative regulation of platelet-derived growth factor receptor signaling pathway|positive regul…	oas03320,oas04152,oas04211,oas04920,oas04930,oas04932	PPAR signaling pathway|AMPK signaling pathway|Longevity regulating pathway|Adipocytokine signaling pathway|Type II diabetes mellitus|Non-alcoholic fatty liver disease (NAFLD)
ADORA2A	14.4851	21.026	7.94411	0.378132	-1.40304	0.0157315	0.111384	Down	0.097995	0.0588981	0.0792797	0.266489	0.180542	0.175693	GeneID:101112926	adenosine A2a receptor	GO:0001609,GO:0001963,GO:0001975,GO:0005622,GO:0005887,GO:0007189,GO:0007626,GO:0019899,GO:0032230,GO:0042755,GO:0042802,GO:0046636,GO:0050728,GO:0060080,GO:0098794,GO:2001235	G protein-coupled adenosine receptor activity|synaptic transmission, dopaminergic|response to amphetamine|intracellular|integral component of plasma membrane|adenylate cyclase-activating G protein-coupled receptor signaling pathway|locomotory behavior|enzyme binding|positive regulation of synaptic transmission, GABAergic|eating behavior|identical protein binding|negative regulation of alpha-beta …	oas04015,oas04020,oas04024,oas04080,oas04270,oas05012,oas05034	Rap1 signaling pathway|Calcium signaling pathway|cAMP signaling pathway|Neuroactive ligand-receptor interaction|Vascular smooth muscle contraction|Parkinson disease|Alcoholism
AGRP	27.5001	41.7436	13.2566	0.317665	-1.65442	0.00161753	0.0217654	Down	0.311702	0.24533	0.337731	1.61456	0.865956	0.332645	GeneID:443269	agouti related neuropeptide	GO:0005184,GO:0005615,GO:0005796,GO:0007218,GO:0009755,GO:0031781,GO:0031782,GO:0060259	neuropeptide hormone activity|extracellular space|Golgi lumen|neuropeptide signaling pathway|hormone-mediated signaling pathway|type 3 melanocortin receptor binding|type 4 melanocortin receptor binding|regulation of feeding behavior	oas04920	Adipocytokine signaling pathway
AJM1	12.6711	19.7074	5.63468	0.28604	-1.80571	0.00470901	0.0462624	Down	0.0281008	0.0234576	0.0284175	0.0896256	0.124636	0.0653092	GeneID:106990977	apical junction component 1 homolog	GO:0005912,GO:0005929,GO:0016324,GO:0045216	adherens junction|cilium|apical plasma membrane|cell-cell junction organization
AKAP12	517.199	306.287	728.111	2.37687	1.24906	7.23192e-19	5.40339e-16	Up	2.09419	2.44376	2.38134	0.82536	0.903023	1.17587	GeneID:101105509	A-kinase anchoring protein 12
AKAP4	38.5911	24.0383	53.144	2.2103	1.14424	0.00170598	0.0226974	Up	0.205863	0.293859	0.327889	0.134773	0.13696	0.102524	GeneID:101102535	A-kinase anchoring protein 4	GO:0005737,GO:0005929,GO:0007178,GO:0008104,GO:0010738,GO:0030018,GO:0030317,GO:0031514,GO:0035686,GO:0044458,GO:0045184,GO:0048471,GO:0051018,GO:0097228	cytoplasm|cilium|transmembrane receptor protein serine/threonine kinase signaling pathway|protein localization|regulation of protein kinase A signaling|Z disc|flagellated sperm motility|motile cilium|sperm fibrous sheath|motile cilium assembly|establishment of protein localization|perinuclear region of cytoplasm|protein kinase A binding|sperm principal piece
AKAP5	41.4656	59.0908	23.8403	0.403696	-1.30866	0.0005131	0.00927893	Down	0.195181	0.136862	0.138167	0.537331	0.366252	0.259212	GeneID:101109277	A-kinase anchoring protein 5	GO:0005516,GO:0005622,GO:0005886,GO:0006605,GO:0007165,GO:0008179,GO:0014069,GO:0031698,GO:0032590,GO:0032947,GO:0034237,GO:0035254,GO:0043197,GO:0045762,GO:0050811,GO:0060076	calmodulin binding|intracellular|plasma membrane|protein targeting|signal transduction|adenylate cyclase binding|postsynaptic density|beta-2 adrenergic receptor binding|dendrite membrane|protein-containing complex scaffold activity|protein kinase A regulatory subunit binding|glutamate receptor binding|dendritic spine|positive regulation of adenylate cyclase activity|GABA receptor binding|excitato…
AKNA	318.555	428.641	208.468	0.486563	-1.0393	7.10311e-09	8.13191e-07	Down	1.42241	0.864006	0.902851	2.4182	2.28191	1.8388	GeneID:101118854	AT-hook transcription factor	GO:0000978,GO:0000981,GO:0001077,GO:0001650,GO:0005654,GO:0005813,GO:0005829,GO:0016020,GO:0043231,GO:0045944	RNA polymerase II proximal promoter sequence-specific DNA binding|DNA-binding transcription factor activity, RNA polymerase II-specific|proximal promoter DNA-binding transcription activator activity, RNA polymerase II-specific|fibrillar center|nucleoplasm|centrosome|cytosol|membrane|intracellular membrane-bounded organelle|positive regulation of transcription by RNA polymerase II
AMH	11.3434	17.7015	4.98521	0.281372	-1.82945	0.00787195	0.067482	Down	0.0460527	0.0768866	0.108668	0.324687	0.329955	0.168192	GeneID:101121773	anti-Mullerian hormone	GO:0001655,GO:0001880,GO:0005615,GO:0007506,GO:0008083,GO:0030154	urogenital system development|Mullerian duct regression|extracellular space|gonadal mesoderm development|growth factor activity|cell differentiation	oas04024,oas04060,oas04350,oas04390	cAMP signaling pathway|Cytokine-cytokine receptor interaction|TGF-beta signaling pathway|Hippo signaling pathway
AMN	24.6562	33.7019	15.6104	0.462873	-1.11131	0.0112225	0.0867726	Down	0.218212	0.309665	0.331007	0.586082	0.576979	0.688271	GeneID:101122221	amnion associated transmembrane protein	GO:0005102,GO:0005615,GO:0005886,GO:0005905,GO:0006898,GO:0007275,GO:0007588,GO:0009235,GO:0010008,GO:0015889,GO:0016021,GO:0016324,GO:0030139,GO:0031526,GO:0032991,GO:0034384,GO:0043001,GO:0070062	signaling receptor binding|extracellular space|plasma membrane|clathrin-coated pit|receptor-mediated endocytosis|multicellular organism development|excretion|cobalamin metabolic process|endosome membrane|cobalamin transport|integral component of membrane|apical plasma membrane|endocytic vesicle|brush border membrane|protein-containing complex|high-density lipoprotein particle clearance|Golgi to p…
AMPD1	1.83631	3.67262	0	0.0498334	-4.32674	0.0197021	0.129787	Down	0	0	0	0.0465393	0.0472944	0.0345182	GeneID:101102023	adenosine monophosphate deaminase 1	GO:0003876,GO:0005829,GO:0010033,GO:0032036,GO:0032264,GO:0043101,GO:0046872	AMP deaminase activity|cytosol|response to organic substance|myosin heavy chain binding|IMP salvage|purine-containing compound salvage|metal ion binding	oas00230	Purine metabolism
ANGPTL4	674.452	961.749	387.155	0.402594	-1.3126	7.50841e-22	1.18433e-18	Down	7.79047	6.44835	8.44521	21.8261	18.9946	15.4038	GeneID:101104317	angiopoietin like 4	GO:0001525,GO:0004857,GO:0005615,GO:0030154,GO:0042802,GO:0051005,GO:0070328,GO:2000352	angiogenesis|enzyme inhibitor activity|extracellular space|cell differentiation|identical protein binding|negative regulation of lipoprotein lipase activity|triglyceride homeostasis|negative regulation of endothelial cell apoptotic process	oas03320,oas04979	PPAR signaling pathway|Cholesterol metabolism
ANKMY1	16.2646	8.35634	24.1728	2.89535	1.53374	0.00910412	0.0746633	Up	0.249042	0.174629	0.18469	0.0334444	0.127451	0.0496115	GeneID:101104451	ankyrin repeat and MYND domain containing 1	GO:0046872	metal ion binding
ANKRD22	380.411	557.617	203.206	0.364556	-1.45579	5.7977e-14	2.39764e-11	Down	3.38633	1.95701	2.68692	8.77595	7.99851	5.20212	GeneID:101120533	ankyrin repeat domain 22
APLNR	10.1389	5.00503	15.2728	3.05022	1.60891	0.0198897	0.130769	Up	0.09405	0.1232	0.117059	0.0437198	0.0296194	0.03603	GeneID:101119419	apelin receptor	GO:0001570,GO:0004930,GO:0005886,GO:0007186,GO:0007369,GO:0007507,GO:0007512,GO:0016021,GO:0043951,GO:0045766,GO:0051281,GO:0060976,GO:1903589,GO:1904325	vasculogenesis|G protein-coupled receptor activity|plasma membrane|G protein-coupled receptor signaling pathway|gastrulation|heart development|adult heart development|integral component of membrane|negative regulation of cAMP-mediated signaling|positive regulation of angiogenesis|positive regulation of release of sequestered calcium ion into cytosol|coronary vasculature development|positive regul…	oas04080,oas04371	Neuroactive ligand-receptor interaction|Apelin signaling pathway
ARHGAP11A	57.8884	25.3833	90.3935	3.56092	1.83225	7.58437e-08	6.37087e-06	Up	0.42704	0.730781	0.461844	0.167265	0.188191	0.10043	GeneID:101103069	Rho GTPase activating protein 11A	GO:0005096,GO:0005829,GO:0007165,GO:0051056	GTPase activator activity|cytosol|signal transduction|regulation of small GTPase mediated signal transduction
ARHGAP33	13.6244	7.68722	19.5616	2.5463	1.34841	0.0277409	0.161541	Up	0.127299	0.114766	0.13517	0.0320535	0.0846912	0.0316988	GeneID:101105098	Rho GTPase activating protein 33	GO:0005096,GO:0005737,GO:0005829,GO:0005886,GO:0007264,GO:0009636,GO:0015031,GO:0019901,GO:0032991,GO:0035091,GO:0043197,GO:0051056,GO:0061001	GTPase activator activity|cytoplasm|cytosol|plasma membrane|small GTPase mediated signal transduction|response to toxic substance|protein transport|protein kinase binding|protein-containing complex|phosphatidylinositol binding|dendritic spine|regulation of small GTPase mediated signal transduction|regulation of dendritic spine morphogenesis
ASPM	45.7943	10.3485	81.2402	7.84777	2.97228	1.86515e-10	3.39458e-08	Up	0.122443	0.3391	0.126251	0.0193448	0.029488	0.0263048	GeneID:443284	abnormal spindle microtubule assembly	GO:0005516,GO:0005634,GO:0005737,GO:0005819,GO:0007051,GO:0051301	calmodulin binding|nucleus|cytoplasm|spindle|spindle organization|cell division
ATCAY	18.5768	9.34385	27.8097	2.97716	1.57394	0.00238126	0.0285188	Up	0.214889	0.141456	0.161431	0.0680221	0.0502733	0.0550386	GeneID:101116652	ATCAY kinesin light chain interacting caytaxin	GO:0004309,GO:0005737,GO:0006798,GO:0006915,GO:0019894,GO:0030054,GO:0030424,GO:0030425,GO:0031175,GO:0031966,GO:0032880,GO:0043005,GO:0045202,GO:0048311,GO:0050699,GO:2000212	exopolyphosphatase activity|cytoplasm|polyphosphate catabolic process|apoptotic process|kinesin binding|cell junction|axon|dendrite|neuron projection development|mitochondrial membrane|regulation of protein localization|neuron projection|synapse|mitochondrion distribution|WW domain binding|negative regulation of glutamate metabolic process
ATOH8	12.6286	7.33769	17.9196	2.44106	1.28751	0.0409561	0.206586	Up	0.17675	0.177054	0.33195	0.101726	0.0646104	0.113176	GeneID:101102971	atonal bHLH transcription factor 8	GO:0001704,GO:0001937,GO:0003700,GO:0005634,GO:0005654,GO:0005737,GO:0007399,GO:0008134,GO:0010595,GO:0010628,GO:0010629,GO:0016607,GO:0030154,GO:0033613,GO:0035148,GO:0045603,GO:0045892,GO:0045893,GO:0046983,GO:0051450,GO:0060395,GO:0070888	formation of primary germ layer|negative regulation of endothelial cell proliferation|DNA-binding transcription factor activity|nucleus|nucleoplasm|cytoplasm|nervous system development|transcription factor binding|positive regulation of endothelial cell migration|positive regulation of gene expression|negative regulation of gene expression|nuclear speck|cell differentiation|activating transcripti…
AURKB	18.614	5.99853	31.2294	5.20087	2.37875	0.000123172	0.00312799	Up	0.594151	0.956528	0.450637	0.0427445	0.0868761	0.253629	GeneID:101106860	aurora kinase B	GO:0000122,GO:0000775,GO:0000780,GO:0002903,GO:0004674,GO:0005524,GO:0005634,GO:0005694,GO:0005737,GO:0005876,GO:0006468,GO:0007052,GO:0007094,GO:0009838,GO:0030496,GO:0031616,GO:0032133,GO:0032465,GO:0032466,GO:0032467,GO:0034501,GO:0034644,GO:0035174,GO:0036089,GO:0042585,GO:0043988,GO:0044878,GO:0046872,GO:0051233,GO:0051256,GO:0070938,GO:1990385	negative regulation of transcription by RNA polymerase II|chromosome, centromeric region|condensed nuclear chromosome, centromeric region|negative regulation of B cell apoptotic process|protein serine/threonine kinase activity|ATP binding|nucleus|chromosome|cytoplasm|spindle microtubule|protein phosphorylation|mitotic spindle organization|mitotic spindle assembly checkpoint|abscission|midbody|spi…
BCL3	334.645	453.948	215.342	0.474303	-1.07612	9.98473e-15	4.8877e-12	Down	2.76135	3.03153	3.3002	6.86873	6.4092	5.86203	GeneID:101111483	BCL3 transcription coactivator	GO:0000060,GO:0002268,GO:0002315,GO:0002455,GO:0002467,GO:0003677,GO:0003700,GO:0005634,GO:0005654,GO:0005737,GO:0005829,GO:0005886,GO:0006351,GO:0006974,GO:0007249,GO:0008134,GO:0009615,GO:0010225,GO:0019730,GO:0030198,GO:0030330,GO:0030496,GO:0030674,GO:0032729,GO:0032991,GO:0032996,GO:0033257,GO:0042088,GO:0042536,GO:0042742,GO:0042771,GO:0042832,GO:0042981,GO:0043066,GO:0043231,GO:0045064,GO:…	protein import into nucleus, translocation|follicular dendritic cell differentiation|marginal zone B cell differentiation|humoral immune response mediated by circulating immunoglobulin|germinal center formation|DNA binding|DNA-binding transcription factor activity|nucleus|nucleoplasm|cytoplasm|cytosol|plasma membrane|transcription, DNA-templated|cellular response to DNA damage stimulus|I-kappaB k…	oas04625,oas04668	C-type lectin receptor signaling pathway|TNF signaling pathway
BEND5	38.9321	52.3979	25.4663	0.486465	-1.03959	0.00599781	0.0549322	Down	0.517415	0.251748	0.373748	0.565804	0.862476	0.912939	GeneID:101107646	BEN domain containing 5	GO:0003677,GO:0005794,GO:0045892	DNA binding|Golgi apparatus|negative regulation of transcription, DNA-templated
BEST2	13.8349	22.0429	5.62685	0.255503	-1.96859	0.00466912	0.0459659	Down	0.099587	0.0570047	0.0863225	0.544502	0.305791	0.0991932	GeneID:101123465	bestrophin 2	GO:0005254,GO:0005886,GO:0005929,GO:0006821,GO:0007608,GO:0034707,GO:0051899,GO:1902476	chloride channel activity|plasma membrane|cilium|chloride transport|sensory perception of smell|chloride channel complex|membrane depolarization|chloride transmembrane transport	oas04970	Salivary secretion
BIRC5	66.6655	35.669	97.662	2.73635	1.45225	1.83483e-05	0.000681863	Up	0.871348	1.33056	0.9349	0.310375	0.228401	0.603298	GeneID:101123390	baculoviral IAP repeat containing 5	GO:0000086,GO:0000226,GO:0000281,GO:0000775,GO:0000777,GO:0005634,GO:0005737,GO:0005814,GO:0005829,GO:0005876,GO:0005881,GO:0006468,GO:0007059,GO:0007094,GO:0008017,GO:0008270,GO:0015631,GO:0030496,GO:0031021,GO:0031503,GO:0031536,GO:0032133,GO:0042803,GO:0043027,GO:0043066,GO:0043154,GO:0043524,GO:0045892,GO:0045931,GO:0048037,GO:0051301,GO:0051303,GO:0061178,GO:0061469	G2/M transition of mitotic cell cycle|microtubule cytoskeleton organization|mitotic cytokinesis|chromosome, centromeric region|condensed chromosome kinetochore|nucleus|cytoplasm|centriole|cytosol|spindle microtubule|cytoplasmic microtubule|protein phosphorylation|chromosome segregation|mitotic spindle assembly checkpoint|microtubule binding|zinc ion binding|tubulin binding|midbody|interphase micr…	oas01524,oas04210,oas04215,oas04390,oas05161,oas05200,oas05210	Platinum drug resistance|Apoptosis|Apoptosis - multiple species|Hippo signaling pathway|Hepatitis B|Pathways in cancer|Colorectal cancer
BUB1	23.4536	10.0041	36.903	3.68589	1.88201	0.000356576	0.00703243	Up	0.218036	0.412554	0.269493	0.0325339	0.0743889	0.136739	GeneID:101117404	BUB1 mitotic checkpoint serine/threonine kinase			oas04110,oas04114,oas04914	Cell cycle|Oocyte meiosis|Progesterone-mediated oocyte maturation
BUB1B	47.6114	18.0192	77.2037	4.2822	2.09835	2.51312e-07	1.83898e-05	Up	0.312374	0.789728	0.63179	0.194765	0.0989624	0.111121	GeneID:101108313	BUB1 mitotic checkpoint serine/threonine kinase B			oas04110,oas05166	Cell cycle|Human T-cell leukemia virus 1 infection
CACNA1I	24.7665	9.67472	39.8582	4.11776	2.04186	3.72823e-05	0.0011956	Up	0.0965782	0.132576	0.202568	0.0252188	0.0329503	0.0463167	GeneID:101123461	calcium voltage-gated channel subunit alpha1 I	GO:0005886,GO:0005891,GO:0008332,GO:0019228,GO:0030317,GO:0034765,GO:0045956,GO:0060402,GO:0070509,GO:0086010	plasma membrane|voltage-gated calcium channel complex|low voltage-gated calcium channel activity|neuronal action potential|flagellated sperm motility|regulation of ion transmembrane transport|positive regulation of calcium ion-dependent exocytosis|calcium ion transport into cytosol|calcium ion import|membrane depolarization during action potential	oas04010,oas04020,oas04713,oas04925,oas04927,oas04934	MAPK signaling pathway|Calcium signaling pathway|Circadian entrainment|Aldosterone synthesis and secretion|Cortisol synthesis and secretion|Cushing syndrome
CASQ2	31.7488	19.682	43.8156	2.22528	1.15398	0.00418785	0.0428011	Up	0.432343	0.549281	0.415889	0.148691	0.194276	0.283588	GeneID:101105292	calsequestrin 2	GO:0005509,GO:0010880,GO:0014809,GO:0016529,GO:0030018,GO:0033018,GO:0060315	calcium ion binding|regulation of release of sequestered calcium ion into cytosol by sarcoplasmic reticulum|regulation of skeletal muscle contraction by regulation of release of sequestered calcium ion|sarcoplasmic reticulum|Z disc|sarcoplasmic reticulum lumen|negative regulation of ryanodine-sensitive calcium-release channel activity
CCDC103	22.8258	31.3686	14.2831	0.455009	-1.13603	0.0129589	0.0960651	Down	0.258413	0.388286	0.283103	0.58561	0.683276	0.772174	GeneID:101117001	coiled-coil domain containing 103	GO:0001947,GO:0003341,GO:0005737,GO:0031514,GO:0036158,GO:0036159,GO:0042803,GO:0070286,GO:0071907	heart looping|cilium movement|cytoplasm|motile cilium|outer dynein arm assembly|inner dynein arm assembly|protein homodimerization activity|axonemal dynein complex assembly|determination of digestive tract left/right asymmetry
CCDC3	47.836	70.8239	24.8482	0.351027	-1.51035	2.85681e-05	0.000967331	Down	0.300777	0.225971	0.282442	0.757351	1.0665	0.481481	GeneID:101109471	coiled-coil domain containing 3	GO:0005576,GO:0005783,GO:0010804,GO:0045600,GO:0046889	extracellular region|endoplasmic reticulum|negative regulation of tumor necrosis factor-mediated signaling pathway|positive regulation of fat cell differentiation|positive regulation of lipid biosynthetic process
CCDC33	91.1862	121.931	60.4416	0.495587	-1.01279	0.000428064	0.00805942	Down	0.54416	0.75646	0.729982	1.46526	1.81866	0.818543	GeneID:101120277	coiled-coil domain containing 33
CCN3	31.3325	43.7371	18.928	0.432559	-1.20903	0.00205722	0.0258383	Down	0.196164	0.27019	0.235571	0.543331	0.61489	0.464048	GeneID:101113859;GeneID:114116377	cellular communication network factor 3	GO:0001525,GO:0002062,GO:0005112,GO:0005178,GO:0005520,GO:0005576,GO:0005737,GO:0005921,GO:0007155,GO:0008083,GO:0008201,GO:0010468,GO:0010761,GO:0010832,GO:0014909,GO:0030308,GO:0030424,GO:0030425,GO:0031012,GO:0033627,GO:0035767,GO:0043025,GO:0043231,GO:0044342,GO:0045747,GO:0046676,GO:0048659,GO:0050728,GO:0060326,GO:0060392,GO:0060548,GO:0061484,GO:0062023,GO:0071603,GO:0090027,GO:1901223,GO:…	angiogenesis|chondrocyte differentiation|Notch binding|integrin binding|insulin-like growth factor binding|extracellular region|cytoplasm|gap junction|cell adhesion|growth factor activity|heparin binding|regulation of gene expression|fibroblast migration|negative regulation of myotube differentiation|smooth muscle cell migration|negative regulation of cell growth|axon|dendrite|extracellular matri…
CCNB1IP1	9.47088	4.67683	14.2649	3.05116	1.60936	0.0269617	0.158488	Up	0.198553	0.225413	0.147247	0.0399961	0.0948384	0.052738	GeneID:101115966	cyclin B1 interacting protein 1	GO:0000795,GO:0001825,GO:0007131,GO:0007286,GO:0016567,GO:0016740,GO:0046872,GO:0051026	synaptonemal complex|blastocyst formation|reciprocal meiotic recombination|spermatid development|protein ubiquitination|transferase activity|metal ion binding|chiasma assembly
CDC20	58.945	23.0035	94.8865	4.12216	2.0434	3.19516e-06	0.000159713	Up	0.924472	2.57974	1.2187	0.166271	0.304144	0.674169	GeneID:101110548	cell division cycle 20	GO:0000922,GO:0005654,GO:0005680,GO:0005815,GO:0005829,GO:0007064,GO:0008022,GO:0010997,GO:0016567,GO:0019899,GO:0031145,GO:0031915,GO:0040020,GO:0051301,GO:0090129,GO:0090307,GO:0097027,GO:1904146,GO:1904668	spindle pole|nucleoplasm|anaphase-promoting complex|microtubule organizing center|cytosol|mitotic sister chromatid cohesion|protein C-terminus binding|anaphase-promoting complex binding|protein ubiquitination|enzyme binding|anaphase-promoting complex-dependent catabolic process|positive regulation of synaptic plasticity|regulation of meiotic nuclear division|cell division|positive regulation of s…	oas04110,oas04114,oas04120,oas05166,oas05203	Cell cycle|Oocyte meiosis|Ubiquitin mediated proteolysis|Human T-cell leukemia virus 1 infection|Viral carcinogenesis
CDCA2	15.7691	9.68292	21.8552	2.25825	1.1752	0.0334315	0.181867	Up	0.204096	0.122668	0.214652	0.0822254	0.0919154	0.0650524	GeneID:101111159	cell division cycle associated 2	GO:0005634,GO:0007049,GO:0035307,GO:0051301	nucleus|cell cycle|positive regulation of protein dephosphorylation|cell division
CDCA3	32.271	19.0032	45.5387	2.39458	1.25977	0.00539212	0.050963	Up	0.895322	1.62405	0.807532	0.316835	0.321975	0.747168	GeneID:101110222	cell division cycle associated 3	GO:0005829,GO:0005913,GO:0007049,GO:0016567,GO:0051301	cytosol|cell-cell adherens junction|cell cycle|protein ubiquitination|cell division
CDCA7	20.423	11.9916	28.8544	2.40461	1.2658	0.0257159	0.153711	Up	0.303695	0.314357	0.266169	0.0611757	0.0518069	0.252078	GeneID:101111162	cell division cycle associated 7	GO:0005634,GO:0005654,GO:0005829,GO:0006355,GO:0006915,GO:0042127	nucleus|nucleoplasm|cytosol|regulation of transcription, DNA-templated|apoptotic process|regulation of cell proliferation
CDH17	27.9257	38.3864	17.4651	0.455825	-1.13345	0.0235228	0.146012	Down	0.312965	0.080615	0.0813838	0.423289	0.329482	0.285008	GeneID:101111295	cadherin 17			oas05226	Gastric cancer
CELSR2	19.5153	28.736	10.2946	0.358174	-1.48127	0.0382825	0.197795	Down	0.0105966	0.00796112	0.0642963	0.117401	0.0949021	0.0184707	GeneID:101103606	cadherin EGF LAG seven-pass G-type receptor 2	GO:0004930,GO:0005509,GO:0005737,GO:0005886,GO:0006355,GO:0007156,GO:0007186,GO:0016021,GO:0016055,GO:0021999,GO:0022407,GO:0048813,GO:0060071	G protein-coupled receptor activity|calcium ion binding|cytoplasm|plasma membrane|regulation of transcription, DNA-templated|homophilic cell adhesion via plasma membrane adhesion molecules|G protein-coupled receptor signaling pathway|integral component of membrane|Wnt signaling pathway|neural plate anterior/posterior regionalization|regulation of cell-cell adhesion|dendrite morphogenesis|Wnt sign…
CENPA	21.9731	11.6784	32.2679	2.76107	1.46523	0.00391974	0.0408851	Up	0.26082	0.599382	0.636128	0.154527	0.172738	0.213944	GeneID:101110750	centromere protein A	GO:0000777,GO:0000786,GO:0005634,GO:0006334,GO:0031492,GO:0046982	condensed chromosome kinetochore|nucleosome|nucleus|nucleosome assembly|nucleosomal DNA binding|protein heterodimerization activity
CENPE	36.058	15.0142	57.1018	3.80193	1.92673	5.2406e-06	0.000240762	Up	0.187188	0.256592	0.122878	0.0330761	0.0504192	0.0654203	GeneID:101105752	centromere protein E	GO:0000278,GO:0000775,GO:0000776,GO:0000777,GO:0000779,GO:0003777,GO:0005524,GO:0005634,GO:0005654,GO:0005694,GO:0005828,GO:0005829,GO:0005871,GO:0005874,GO:0006890,GO:0007018,GO:0007052,GO:0007059,GO:0007079,GO:0007080,GO:0007275,GO:0008017,GO:0015630,GO:0016020,GO:0016887,GO:0019886,GO:0030071,GO:0030496,GO:0043515,GO:0045860,GO:0051233,GO:0051301,GO:0051310,GO:0051315,GO:0051382,GO:0099606,GO:…	mitotic cell cycle|chromosome, centromeric region|kinetochore|condensed chromosome kinetochore|condensed chromosome, centromeric region|microtubule motor activity|ATP binding|nucleus|nucleoplasm|chromosome|kinetochore microtubule|cytosol|kinesin complex|microtubule|retrograde vesicle-mediated transport, Golgi to ER|microtubule-based movement|mitotic spindle organization|chromosome segregation|mit…
CENPF	77.6599	29.3404	125.979	4.29079	2.10124	1.45375e-10	2.68018e-08	Up	0.24722	0.446277	0.286466	0.0700305	0.0474445	0.110296	GeneID:101112149	centromere protein F
CEP55	9.29821	4.33963	14.2568	3.28566	1.71618	0.02387	0.147266	Up	0.147235	0.126419	0.180801	0.0105924	0.0645858	0.0628513	GeneID:101104542	centrosomal protein 55	GO:0000281,GO:0000920,GO:0005813,GO:0005814,GO:0005815,GO:0005886,GO:0014066,GO:0016020,GO:0030496,GO:0032154,GO:0045171,GO:0045184,GO:0061952,GO:0072001,GO:0090543,GO:1904888	mitotic cytokinesis|septum digestion after cytokinesis|centrosome|centriole|microtubule organizing center|plasma membrane|regulation of phosphatidylinositol 3-kinase signaling|membrane|midbody|cleavage furrow|intercellular bridge|establishment of protein localization|midbody abscission|renal system development|Flemming body|cranial skeletal system development
CEP72	12.2487	5.00543	19.4919	3.89622	1.96208	0.00707	0.0623777	Up	0.347246	0.194383	0.0619694	0.0411462	0.0522672	0.0610363	GeneID:101109828	centrosomal protein 72	GO:0005813,GO:0007051,GO:0007099,GO:0033566,GO:0034451,GO:0042802,GO:1904779	centrosome|spindle organization|centriole replication|gamma-tubulin complex localization|centriolar satellite|identical protein binding|regulation of protein localization to centrosome
CFAP58	83.3734	113.152	53.5949	0.473985	-1.07709	0.00017964	0.00421517	Down	0.400389	0.182844	0.37513	0.812466	0.632796	0.568884	GeneID:101116527	cilia and flagella associated protein 58	GO:0005929	cilium
CHRD	5.83756	9.68252	1.99261	0.205642	-2.28179	0.0190199	0.126658	Down	0.0165332	0.0248424	0.00835977	0.0999123	0.0846111	0.0576373	GeneID:443243	chordin	GO:0001501,GO:0001649,GO:0001702,GO:0001707,GO:0002053,GO:0005615,GO:0008201,GO:0019955,GO:0021919,GO:0030336,GO:0030514,GO:0030900,GO:0033504,GO:0045545,GO:0045668,GO:0045785	skeletal system development|osteoblast differentiation|gastrulation with mouth forming second|mesoderm formation|positive regulation of mesenchymal cell proliferation|extracellular space|heparin binding|cytokine binding|BMP signaling pathway involved in spinal cord dorsal/ventral patterning|negative regulation of cell migration|negative regulation of BMP signaling pathway|forebrain development|fl…	oas04350	TGF-beta signaling pathway
CHRM5	70.3508	102.555	38.1462	0.371975	-1.42672	1.73936e-05	0.000660354	Down	0.453535	0.427591	0.660992	1.62566	1.77491	0.744045	GeneID:101110766	cholinergic receptor muscarinic 5	GO:0001696,GO:0004435,GO:0004930,GO:0004993,GO:0005886,GO:0005887,GO:0007186,GO:0007187,GO:0007197,GO:0007213,GO:0007268,GO:0008283,GO:0015872,GO:0016907,GO:0019226,GO:0030054,GO:0030425,GO:0030594,GO:0045211,GO:0060304	gastric acid secretion|phosphatidylinositol phospholipase C activity|G protein-coupled receptor activity|G protein-coupled serotonin receptor activity|plasma membrane|integral component of plasma membrane|G protein-coupled receptor signaling pathway|G protein-coupled receptor signaling pathway, coupled to cyclic nucleotide second messenger|adenylate cyclase-inhibiting G protein-coupled acetylchol…	oas04020,oas04080,oas04725,oas04810	Calcium signaling pathway|Neuroactive ligand-receptor interaction|Cholinergic synapse|Regulation of actin cytoskeleton
CIDEB	35.3219	55.4022	15.2416	0.275224	-1.86132	1.20799e-06	6.94276e-05	Down	0.265956	0.222012	0.194245	0.758962	0.846891	0.868299	GeneID:101113497	cell death inducing DFFA like effector b	GO:0005811,GO:0005829,GO:0042802,GO:0048471,GO:0090200,GO:0097194,GO:0097202	lipid droplet|cytosol|identical protein binding|perinuclear region of cytoplasm|positive regulation of release of cytochrome c from mitochondria|execution phase of apoptosis|activation of cysteine-type endopeptidase activity
CISH	23.4607	31.6804	15.2411	0.481156	-1.05542	0.032284	0.178188	Down	0.209087	0.125668	0.310118	0.336945	0.342412	0.65255	GeneID:101119259	cytokine inducible SH2 containing protein	GO:0005622,GO:0005886,GO:0005942,GO:0007205,GO:0016567,GO:0035556,GO:0040008,GO:0046627,GO:0046854,GO:0046935	intracellular|plasma membrane|phosphatidylinositol 3-kinase complex|protein kinase C-activating G protein-coupled receptor signaling pathway|protein ubiquitination|intracellular signal transduction|regulation of growth|negative regulation of insulin receptor signaling pathway|phosphatidylinositol phosphorylation|1-phosphatidylinositol-3-kinase regulator activity	oas04630,oas04917	Jak-STAT signaling pathway|Prolactin signaling pathway
CMTM8	19.318	12.3507	26.2853	2.12679	1.08868	0.0354914	0.188293	Up	0.506467	1.21761	0.956063	0.408087	0.449268	0.403572	GeneID:114109374	CKLF like MARVEL transmembrane domain containing 8	GO:0005125,GO:0005615,GO:0005654,GO:0006935,GO:0016021,GO:0019911,GO:0042552	cytokine activity|extracellular space|nucleoplasm|chemotaxis|integral component of membrane|structural constituent of myelin sheath|myelination
COCH	18.0225	30.0622	5.98285	0.198802	-2.3306	5.79257e-05	0.00167137	Down	0.0363686	0.0637545	0.0643625	0.302199	0.353632	0.172068	GeneID:101102269	cochlin
COL9A3	16.4896	24.7078	8.27128	0.335144	-1.57715	0.0050091	0.0484725	Down	0.107883	0.0432273	0.120009	0.249914	0.320222	0.236403	GeneID:101120183	collagen type IX alpha 3 chain	GO:0005201,GO:0005576,GO:0005594,GO:0005615,GO:0005788,GO:0008584,GO:0008585,GO:0030020,GO:0030198,GO:0031012	extracellular matrix structural constituent|extracellular region|collagen type IX trimer|extracellular space|endoplasmic reticulum lumen|male gonad development|female gonad development|extracellular matrix structural constituent conferring tensile strength|extracellular matrix organization|extracellular matrix	oas04151,oas04510,oas04512,oas04974,oas05165	PI3K-Akt signaling pathway|Focal adhesion|ECM-receptor interaction|Protein digestion and absorption|Human papillomavirus infection
CPNE7	2.83663	5.34077	0.332495	0.0667426	-3.90525	0.0179434	0.122053	Down	0	0	0.00954708	0.0855768	0.0386512	0.02821	GeneID:101110962	copine 7	GO:0005544,GO:0005634,GO:0005737,GO:0005886,GO:0071277	calcium-dependent phospholipid binding|nucleus|cytoplasm|plasma membrane|cellular response to calcium ion
CREB3L3	6.51166	11.0255	1.99778	0.180823	-2.46735	0.0114204	0.0879199	Down	0.0107672	0.0323572	0.0217772	0.0542232	0.198371	0.107246	GeneID:101113586	cAMP responsive element binding protein 3 like 3	GO:0001228,GO:0005634,GO:0005789,GO:0016021,GO:0030968,GO:0035497,GO:0042803,GO:0046982,GO:1990440	DNA-binding transcription activator activity, RNA polymerase II-specific|nucleus|endoplasmic reticulum membrane|integral component of membrane|endoplasmic reticulum unfolded protein response|cAMP response element binding|protein homodimerization activity|protein heterodimerization activity|positive regulation of transcription from RNA polymerase II promoter in response to endoplasmic reticulum st…	oas04022,oas04024,oas04151,oas04152,oas04211,oas04261,oas04668,oas04714,oas04725,oas04728,oas04911,oas04915,oas04916,oas04918,oas04922,oas04925,oas04926,oas04927,oas04928,oas04931,oas04934,oas04962,oas05016,oas05030,oas05031,oas05034,oas05161,oas05163,oas05165,oas05166,oas05203,oas05215	cGMP-PKG signaling pathway|cAMP signaling pathway|PI3K-Akt signaling pathway|AMPK signaling pathway|Longevity regulating pathway|Adrenergic signaling in cardiomyocytes|TNF signaling pathway|Thermogenesis|Cholinergic synapse|Dopaminergic synapse|Insulin secretion|Estrogen signaling pathway|Melanogenesis|Thyroid hormone synthesis|Glucagon signaling pathway|Aldosterone synthesis and secretion|Relaxi…
CRLF1	11.3328	16.6958	5.96984	0.357586	-1.48364	0.0258922	0.154234	Down	0.104359	0.104539	0.105536	0.40292	0.302642	0.173244	GeneID:101108913	cytokine receptor like factor 1	GO:0001657,GO:0004896,GO:0005576,GO:0005615,GO:0005829,GO:0008284,GO:0009897,GO:0010469,GO:0019221,GO:0019955,GO:0042531,GO:0043235,GO:0043524,GO:0046982,GO:0070106,GO:0097058,GO:2000672	ureteric bud development|cytokine receptor activity|extracellular region|extracellular space|cytosol|positive regulation of cell proliferation|external side of plasma membrane|regulation of signaling receptor activity|cytokine-mediated signaling pathway|cytokine binding|positive regulation of tyrosine phosphorylation of STAT protein|receptor complex|negative regulation of neuron apoptotic process…
CYFIP2	179.087	256.883	101.291	0.394221	-1.34292	5.9824e-08	5.22139e-06	Down	0.341249	0.48493	0.389236	1.155	1.3362	0.5968	GeneID:101113147	cytoplasmic FMR1 interacting protein 2	GO:0000902,GO:0005634,GO:0005737,GO:0005829,GO:0006915,GO:0007411,GO:0016020,GO:0030031,GO:0030054,GO:0038096,GO:0043005,GO:0045202,GO:0045862,GO:0048010,GO:0048471,GO:0051388,GO:0070062,GO:0097202,GO:0097484,GO:0098609	cell morphogenesis|nucleus|cytoplasm|cytosol|apoptotic process|axon guidance|membrane|cell projection assembly|cell junction|Fc-gamma receptor signaling pathway involved in phagocytosis|neuron projection|synapse|positive regulation of proteolysis|vascular endothelial growth factor receptor signaling pathway|perinuclear region of cytoplasm|positive regulation of neurotrophin TRK receptor signaling…	oas03013,oas04810	RNA transport|Regulation of actin cytoskeleton
CYP1A1	254.608	160.868	348.348	2.16503	1.11439	7.36696e-10	1.10086e-07	Up	2.87018	3.83348	4.5043	1.50965	1.80615	1.85294	GeneID:100170113	cytochrome P4501A1	GO:0005506,GO:0005789,GO:0020037,GO:0031090,GO:0070330	iron ion binding|endoplasmic reticulum membrane|heme binding|organelle membrane|aromatase activity	oas00140,oas00380,oas00830,oas00980,oas04913,oas05204	Steroid hormone biosynthesis|Tryptophan metabolism|Retinol metabolism|Metabolism of xenobiotics by cytochrome P450|Ovarian steroidogenesis|Chemical carcinogenesis
DDIT4	2453.39	3360.01	1546.77	0.460332	-1.11925	1.53739e-19	1.55891e-16	Down	22.2235	25.4623	26.377	62.7051	56.7285	41.3408	GeneID:101114584	DNA damage inducible transcript 4	GO:0001666,GO:0001764,GO:0005737,GO:0005739,GO:0005829,GO:0007420,GO:0008283,GO:0010801,GO:0030182,GO:0032007,GO:0032984,GO:0033137,GO:0042771,GO:0045820,GO:0048011,GO:0051607,GO:0071549,GO:0071889,GO:0072593,GO:1901216,GO:1902532	response to hypoxia|neuron migration|cytoplasm|mitochondrion|cytosol|brain development|cell proliferation|negative regulation of peptidyl-threonine phosphorylation|neuron differentiation|negative regulation of TOR signaling|protein-containing complex disassembly|negative regulation of peptidyl-serine phosphorylation|intrinsic apoptotic signaling pathway in response to DNA damage by p53 class medi…	oas04140,oas04150,oas04151,oas05206	Autophagy - animal|mTOR signaling pathway|PI3K-Akt signaling pathway|MicroRNAs in cancer
DDN	23.8231	32.7478	14.8984	0.455283	-1.13516	0.0267807	0.157816	Down	0.136375	0.0834835	0.122589	0.305234	0.34896	0.0981034	GeneID:101121002	dendrin	GO:0000978,GO:0000982,GO:0005634,GO:0005737,GO:0005789,GO:0032591,GO:0042995,GO:0043204,GO:0045944	RNA polymerase II proximal promoter sequence-specific DNA binding|transcription factor activity, RNA polymerase II proximal promoter sequence-specific DNA binding|nucleus|cytoplasm|endoplasmic reticulum membrane|dendritic spine membrane|cell projection|perikaryon|positive regulation of transcription by RNA polymerase II
DEPDC1	23.4528	13.0213	33.8844	2.60166	1.37943	0.00377096	0.0398215	Up	0.189809	0.297879	0.159957	0.0637247	0.103614	0.0819254	GeneID:101116779	DEP domain containing 1	GO:0005096,GO:0005634,GO:0017053,GO:0035556,GO:0045892	GTPase activator activity|nucleus|transcriptional repressor complex|intracellular signal transduction|negative regulation of transcription, DNA-templated
DIAPH3	67.5554	40.7082	94.4025	2.31793	1.21284	0.000122579	0.0031185	Up	0.447044	0.812034	0.440028	0.204117	0.237933	0.290914	GeneID:101105168	diaphanous related formin 3	GO:0003779,GO:0005634,GO:0005737,GO:0005829,GO:0007010,GO:0007283,GO:0017048,GO:0030036,GO:0030041,GO:0045296	actin binding|nucleus|cytoplasm|cytosol|cytoskeleton organization|spermatogenesis|Rho GTPase binding|actin cytoskeleton organization|actin filament polymerization|cadherin binding	oas04810	Regulation of actin cytoskeleton
DKK3	597.454	878.035	316.873	0.360899	-1.47033	9.74596e-06	0.000408123	Down	3.69027	3.16853	3.47075	11.9415	11.0781	5.58318	GeneID:101122131	dickkopf WNT signaling pathway inhibitor 3	GO:0005615,GO:0009653,GO:0016055,GO:0017015,GO:0030325,GO:0032348,GO:0039706,GO:0045892,GO:0048019,GO:0090090,GO:1902613,GO:2000065	extracellular space|anatomical structure morphogenesis|Wnt signaling pathway|regulation of transforming growth factor beta receptor signaling pathway|adrenal gland development|negative regulation of aldosterone biosynthetic process|co-receptor binding|negative regulation of transcription, DNA-templated|receptor antagonist activity|negative regulation of canonical Wnt signaling pathway|negative re…
DLGAP5	19.1045	4.00016	34.2089	8.54257	3.09467	4.67833e-07	3.09271e-05	Up	0.264399	0.388452	0.258467	0.0355066	0.0180414	0.0526706	GeneID:101118701	DLG associated protein 5	GO:0004721,GO:0005634,GO:0005739,GO:0005815,GO:0005829,GO:0007079,GO:0007221,GO:0008283,GO:0031616,GO:0045842	phosphoprotein phosphatase activity|nucleus|mitochondrion|microtubule organizing center|cytosol|mitotic chromosome movement towards spindle pole|positive regulation of transcription of Notch receptor target|cell proliferation|spindle pole centrosome|positive regulation of mitotic metaphase/anaphase transition
DLX2	3.98694	1.33639	6.63749	4.96882	2.3129	0.0468154	0.225898	Up	0.156292	0.182655	0.184397	0.026236	0.0533234	0.0259457	GeneID:101106667	distal-less homeobox 2	GO:0000122,GO:0000977,GO:0001228,GO:0003677,GO:0003682,GO:0003727,GO:0005634,GO:0006357,GO:0009954,GO:0021544,GO:0021766,GO:0021772,GO:0021879,GO:0021882,GO:0021892,GO:0021893,GO:0030154,GO:0042475,GO:0045597,GO:0045746,GO:0045944,GO:0046533,GO:0048701,GO:0048706,GO:0048715,GO:0048755,GO:0051216,GO:1902871	negative regulation of transcription by RNA polymerase II|RNA polymerase II regulatory region sequence-specific DNA binding|DNA-binding transcription activator activity, RNA polymerase II-specific|DNA binding|chromatin binding|single-stranded RNA binding|nucleus|regulation of transcription by RNA polymerase II|proximal/distal pattern formation|subpallium development|hippocampus development|olfact…
DOCK2	51.0707	86.5703	15.5711	0.179893	-2.47479	0.00414906	0.0425271	Down	0.0711657	0.044555	0.0944579	0.54654	0.550855	0.0708843	GeneID:101104011	dedicator of cytokinesis 2	GO:0001766,GO:0001768,GO:0001771,GO:0002277,GO:0005096,GO:0005576,GO:0005829,GO:0005856,GO:0006935,GO:0007264,GO:0016020,GO:0030036,GO:0030676,GO:0035580,GO:0042608,GO:0043312,GO:0044351,GO:0045059,GO:0045060,GO:0046633,GO:0050690,GO:0050766,GO:0070062	membrane raft polarization|establishment of T cell polarity|immunological synapse formation|myeloid dendritic cell activation involved in immune response|GTPase activator activity|extracellular region|cytosol|cytoskeleton|chemotaxis|small GTPase mediated signal transduction|membrane|actin cytoskeleton organization|Rac guanyl-nucleotide exchange factor activity|specific granule lumen|T cell recept…	oas04062,oas04666	Chemokine signaling pathway|Fc gamma R-mediated phagocytosis
DSP	22.1354	11.6858	32.5851	2.7874	1.47892	0.00341386	0.0370258	Up	0.0643976	0.126085	0.0976853	0.0501196	0.0329565	0.0204091	GeneID:101119169	desmoplakin			oas05412	Arrhythmogenic right ventricular cardiomyopathy (ARVC)
DUSP2	52.4054	31.0737	73.7371	2.37319	1.24683	0.000356674	0.00703243	Up	0.89346	1.27857	1.38757	0.433873	0.751184	0.317831	GeneID:101115699	dual specificity phosphatase 2	GO:0000188,GO:0004725,GO:0005634,GO:0005737,GO:0006470,GO:0008138,GO:0008330,GO:0017017,GO:0031965,GO:0051019	inactivation of MAPK activity|protein tyrosine phosphatase activity|nucleus|cytoplasm|protein dephosphorylation|protein tyrosine/serine/threonine phosphatase activity|protein tyrosine/threonine phosphatase activity|MAP kinase tyrosine/serine/threonine phosphatase activity|nuclear membrane|mitogen-activated protein kinase binding	oas04010	MAPK signaling pathway
E2F1	14.7982	8.00258	21.5937	2.69642	1.43104	0.0219359	0.139267	Up	0.210577	0.333062	0.179327	0.0334881	0.0794067	0.154548	GeneID:101117526	E2F transcription factor 1			oas01522,oas04110,oas04137,oas04218,oas04934,oas05160,oas05161,oas05163,oas05165,oas05166,oas05167,oas05169,oas05200,oas05206,oas05212,oas05214,oas05215,oas05218,oas05219,oas05220,oas05222,oas05223,oas05224,oas05225,oas05226	Endocrine resistance|Cell cycle|Mitophagy - animal|Cellular senescence|Cushing syndrome|Hepatitis C|Hepatitis B|Human cytomegalovirus infection|Human papillomavirus infection|Human T-cell leukemia virus 1 infection|Kaposi sarcoma-associated herpesvirus infection|Epstein-Barr virus infection|Pathways in cancer|MicroRNAs in cancer|Pancreatic cancer|Glioma|Prostate cancer|Melanoma|Bladder cancer|Chr…
E2F7	23.2424	11.9986	34.4862	2.87259	1.52235	0.00223113	0.0271639	Up	0.165693	0.156494	0.172349	0.0715221	0.019382	0.0801614	GeneID:101102051	E2F transcription factor 7	GO:0000122,GO:0000978,GO:0000981,GO:0001077,GO:0001078,GO:0001890,GO:0002040,GO:0003700,GO:0003714,GO:0008134,GO:0008285,GO:0016607,GO:0030330,GO:0032466,GO:0032877,GO:0042802,GO:0043565,GO:0045944,GO:0051726,GO:0060707,GO:0060718,GO:0070365,GO:0071930,GO:0090575,GO:2000134	negative regulation of transcription by RNA polymerase II|RNA polymerase II proximal promoter sequence-specific DNA binding|DNA-binding transcription factor activity, RNA polymerase II-specific|proximal promoter DNA-binding transcription activator activity, RNA polymerase II-specific|proximal promoter DNA-binding transcription repressor activity, RNA polymerase II-specific|placenta development|sp…
E2F8	3.15908	0.66515	5.65301	8.47469	3.08316	0.039957	0.203308	Up	0.026222	0.0525343	0.0331471	0	0	0.0130592	GeneID:101115742	E2F transcription factor 8	GO:0000122,GO:0000978,GO:0000981,GO:0001077,GO:0001078,GO:0001890,GO:0002040,GO:0003700,GO:0003714,GO:0005730,GO:0005829,GO:0008134,GO:0008283,GO:0032466,GO:0032877,GO:0033301,GO:0042803,GO:0043565,GO:0045944,GO:0051726,GO:0060707,GO:0060718,GO:0070365,GO:0090575	negative regulation of transcription by RNA polymerase II|RNA polymerase II proximal promoter sequence-specific DNA binding|DNA-binding transcription factor activity, RNA polymerase II-specific|proximal promoter DNA-binding transcription activator activity, RNA polymerase II-specific|proximal promoter DNA-binding transcription repressor activity, RNA polymerase II-specific|placenta development|sp…
EFHD1	22.3085	30.3572	14.2598	0.469677	-1.09026	0.0205791	0.133632	Down	0.234273	0.249343	0.148071	0.38343	0.389651	0.568781	GeneID:101113980	EF-hand domain family member D1	GO:0005509,GO:0005743,GO:0031175	calcium ion binding|mitochondrial inner membrane|neuron projection development
EGR4	50.6991	27.6838	73.7145	2.6614	1.41218	2.88692e-05	0.000973462	Up	0.80805	1.10831	0.854874	0.26294	0.292654	0.482913	GeneID:101113051	early growth response 4	GO:0000977,GO:0000981,GO:0005634,GO:0006357,GO:0045944,GO:0046872,GO:0071363	RNA polymerase II regulatory region sequence-specific DNA binding|DNA-binding transcription factor activity, RNA polymerase II-specific|nucleus|regulation of transcription by RNA polymerase II|positive regulation of transcription by RNA polymerase II|metal ion binding|cellular response to growth factor stimulus
ENTPD3	23.333	31.3776	15.2884	0.486834	-1.0385	0.0223886	0.141194	Down	0.0929377	0.160805	0.136706	0.22125	0.302669	0.277711	GeneID:101114471	ectonucleoside triphosphate diphosphohydrolase 3	GO:0005524,GO:0005886,GO:0009134,GO:0009143,GO:0016021,GO:0017110,GO:0017111,GO:0034656,GO:0102485,GO:0102486,GO:0102487,GO:0102488,GO:0102489,GO:0102490,GO:0102491	ATP binding|plasma membrane|nucleoside diphosphate catabolic process|nucleoside triphosphate catabolic process|integral component of membrane|nucleoside-diphosphatase activity|nucleoside-triphosphatase activity|nucleobase-containing small molecule catabolic process|dATP phosphohydrolase activity|dCTP phosphohydrolase activity|dUTP phosphohydrolase activity|dTTP phosphohydrolase activity|GTP phosp…	oas00230,oas00240,oas05169	Purine metabolism|Pyrimidine metabolism|Epstein-Barr virus infection
EPHB2	3.83797	7.01346	0.662478	0.0945476	-3.40282	0.0156713	0.111013	Down	0.00676947	0.00678111	0	0.0272726	0.0692877	0.0471989	GeneID:101122928	EPH receptor B2	GO:0001525,GO:0001540,GO:0001655,GO:0001933,GO:0004713,GO:0004714,GO:0004888,GO:0005005,GO:0005102,GO:0005524,GO:0005576,GO:0005634,GO:0005737,GO:0005829,GO:0005886,GO:0005887,GO:0007399,GO:0007411,GO:0007413,GO:0007611,GO:0007612,GO:0008046,GO:0009968,GO:0010628,GO:0016310,GO:0018108,GO:0021631,GO:0021952,GO:0022038,GO:0030154,GO:0030424,GO:0030425,GO:0031290,GO:0031915,GO:0042472,GO:0042802,GO:…	angiogenesis|amyloid-beta binding|urogenital system development|negative regulation of protein phosphorylation|protein tyrosine kinase activity|transmembrane receptor protein tyrosine kinase activity|transmembrane signaling receptor activity|transmembrane-ephrin receptor activity|signaling receptor binding|ATP binding|extracellular region|nucleus|cytoplasm|cytosol|plasma membrane|integral compone…	oas04360	Axon guidance
EPHX2	154.445	95.7478	213.143	2.22593	1.15441	3.73271e-09	4.99902e-07	Up	2.99595	2.72134	2.4777	1.24024	1.01349	1.41618	GeneID:101106654	epoxide hydrolase 2	GO:0000287,GO:0004301,GO:0005777,GO:0009636,GO:0015643,GO:0019439,GO:0033885,GO:0042577,GO:0042632,GO:0046839	magnesium ion binding|epoxide hydrolase activity|peroxisome|response to toxic substance|toxic substance binding|aromatic compound catabolic process|10-hydroxy-9-(phosphonooxy)octadecanoate phosphatase activity|lipid phosphatase activity|cholesterol homeostasis|phospholipid dephosphorylation	oas00590,oas04146	Arachidonic acid metabolism|Peroxisome
ERCC6L	14.6301	7.01452	22.2457	3.17171	1.66526	0.00536311	0.0508582	Up	0.140028	0.193705	0.114634	0.0335798	0.0682493	0.0398499	GeneID:101108989	ERCC excision repair 6 like, spindle assembly checkpoint helicase	GO:0000777,GO:0003677,GO:0004386,GO:0005524,GO:0007049,GO:0015616,GO:0051301	condensed chromosome kinetochore|DNA binding|helicase activity|ATP binding|cell cycle|DNA translocase activity|cell division
ESM1	35.9398	20.338	51.5415	2.53216	1.34037	0.00149357	0.0205165	Up	0.837513	1.67791	1.56157	0.579931	0.29467	0.729926	GeneID:101117876	endothelial cell specific molecule 1	GO:0001525,GO:0001558,GO:0002040,GO:0005171,GO:0005178,GO:0005520,GO:0005576,GO:0008284,GO:1902204	angiogenesis|regulation of cell growth|sprouting angiogenesis|hepatocyte growth factor receptor binding|integrin binding|insulin-like growth factor binding|extracellular region|positive regulation of cell proliferation|positive regulation of hepatocyte growth factor receptor signaling pathway
ETV4	850.832	1240.58	461.078	0.3717	-1.42779	2.78087e-29	7.89546e-26	Down	4.00572	3.29607	4.45936	11.4085	11.3439	8.82635	GeneID:101110344	ETS variant 4			oas05202	Transcriptional misregulation in cancer
EVPL	7.49933	11.6839	3.31475	0.283775	-1.81718	0.0350615	0.186697	Down	0.0127593	0.00852083	0.0215052	0.0856736	0.0391786	0.0254177	GeneID:101118371	envoplakin	GO:0001533,GO:0005198,GO:0005737,GO:0005829,GO:0008544,GO:0016020,GO:0018149,GO:0019215,GO:0030057,GO:0030216,GO:0030674,GO:0042060,GO:0045104,GO:0045111,GO:0045296,GO:0070062,GO:0070268	cornified envelope|structural molecule activity|cytoplasm|cytosol|epidermis development|membrane|peptide cross-linking|intermediate filament binding|desmosome|keratinocyte differentiation|protein binding, bridging|wound healing|intermediate filament cytoskeleton organization|intermediate filament cytoskeleton|cadherin binding|extracellular exosome|cornification
EXO1	21.4087	12.0092	30.8082	2.56539	1.35918	0.00961855	0.0779986	Up	0.347754	0.304808	0.158253	0.0525382	0.106781	0.155871	GeneID:101120258	exonuclease 1			oas03430	Mismatch repair
FAM129C	33.7781	48.0698	19.4864	0.405981	-1.30051	0.00192694	0.024644	Down	0.319188	0.145335	0.107595	0.467612	0.504899	0.433535	GeneID:101114355	family with sequence similarity 129 member C
FAM167A	73.7755	100.518	47.0329	0.468117	-1.09506	0.00031051	0.00633332	Down	0.30445	0.185376	0.362215	0.703467	0.702661	0.410275	GeneID:101118417	family with sequence similarity 167 member A
FAM180B	6.17663	11.0258	1.32747	0.120364	-3.05453	0.00370853	0.0393176	Down	0.0102245	0.010242	0.0206794	0.10298	0.167441	0.0712882	GeneID:101119248	family with sequence similarity 180 member B	GO:0016021	integral component of membrane
FAM20A	4.83359	8.00706	1.66011	0.20718	-2.27105	0.0396908	0.20268	Down	0.00805654	0.0121056	0	0.0486868	0.0206153	0.0280864	GeneID:101108764	FAM20A golgi associated secretory pathway pseudokinase	GO:0001934,GO:0005615,GO:0005623,GO:0005783,GO:0005794,GO:0006468,GO:0009617,GO:0031214,GO:0043539,GO:0044691,GO:0055074,GO:0070062,GO:0070166	positive regulation of protein phosphorylation|extracellular space|cell|endoplasmic reticulum|Golgi apparatus|protein phosphorylation|response to bacterium|biomineral tissue development|protein serine/threonine kinase activator activity|tooth eruption|calcium ion homeostasis|extracellular exosome|enamel mineralization
FAM71E2	307.125	499.627	114.623	0.229424	-2.12391	0.00267804	0.0310854	Down	1.32115	0.899927	1.45361	7.34518	7.30209	1.36856	GeneID:101120774	family with sequence similarity 71 member E2
FAM78A	27.0741	17.3708	36.7775	2.11835	1.08294	0.0118611	0.0901392	Up	0.269817	0.212364	0.233879	0.116467	0.151234	0.070387	GeneID:101121926	family with sequence similarity 78 member A
FAM83B	109.365	70.7306	147.999	2.09198	1.06487	2.10786e-05	0.000755103	Up	0.462961	0.522156	0.551411	0.158884	0.245703	0.327915	GeneID:101108170	family with sequence similarity 83 member B	GO:0005154,GO:0005737,GO:0007173,GO:0008283,GO:0016020,GO:0019901,GO:0036312,GO:0036313	epidermal growth factor receptor binding|cytoplasm|epidermal growth factor receptor signaling pathway|cell proliferation|membrane|protein kinase binding|phosphatidylinositol 3-kinase regulatory subunit binding|phosphatidylinositol 3-kinase catalytic subunit binding
FAM83C	29.3185	40.1043	18.5327	0.462503	-1.11247	0.0192912	0.127971	Down	0.179026	0.0935656	0.165301	0.329268	0.478015	0.139553	GeneID:101119841	family with sequence similarity 83 member C	GO:0019901	protein kinase binding
FBP1	6.83532	11.0261	2.64459	0.240282	-2.0572	0.0249063	0.151117	Down	0.0813135	0.0407267	0.041115	0.307118	0.291294	0.0809919	GeneID:101113198	fructose-bisphosphatase 1	GO:0005737,GO:0005829,GO:0006002,GO:0006094,GO:0006111,GO:0016208,GO:0016311,GO:0030308,GO:0035690,GO:0042132,GO:0045820,GO:0046580,GO:0046872,GO:0048029,GO:0051289,GO:0071286	cytoplasm|cytosol|fructose 6-phosphate metabolic process|gluconeogenesis|regulation of gluconeogenesis|AMP binding|dephosphorylation|negative regulation of cell growth|cellular response to drug|fructose 1,6-bisphosphate 1-phosphatase activity|negative regulation of glycolytic process|negative regulation of Ras protein signal transduction|metal ion binding|monosaccharide binding|protein homotetram…	oas00010,oas00030,oas00051,oas04152,oas04910	Glycolysis / Gluconeogenesis|Pentose phosphate pathway|Fructose and mannose metabolism|AMPK signaling pathway|Insulin signaling pathway
FCGR2B	11.1734	18.0343	4.31239	0.239115	-2.06422	0.00395235	0.0411217	Down	0.0538781	0.0539708	0.0681068	0.352726	0.261943	0.120746	GeneID:100192432	Fc fragment of IgG, low affinity IIb, receptor (CD32)	GO:0005886,GO:0016021,GO:0019864	plasma membrane|integral component of membrane|IgG binding	oas04145,oas04380,oas04662,oas04666,oas05150,oas05152,oas05162	Phagosome|Osteoclast differentiation|B cell receptor signaling pathway|Fc gamma R-mediated phagocytosis|Staphylococcus aureus infection|Tuberculosis|Measles
FGF1	3.99846	7.00194	0.994973	0.142062	-2.81541	0.0243399	0.149071	Down	0.00665675	0.0066682	0.0067318	0.0335231	0.034067	0.0729348	GeneID:101109353	fibroblast growth factor 1	GO:0000187,GO:0001525,GO:0001759,GO:0005104,GO:0005178,GO:0005576,GO:0005615,GO:0005634,GO:0005829,GO:0005938,GO:0008083,GO:0008201,GO:0008284,GO:0008543,GO:0010595,GO:0030154,GO:0030324,GO:0030335,GO:0031012,GO:0032148,GO:0034605,GO:0044548,GO:0045542,GO:0045766,GO:0045944,GO:0050679,GO:0051781,GO:0060681,GO:0072163,GO:1901509,GO:1902533,GO:1903672,GO:2000544	activation of MAPK activity|angiogenesis|organ induction|fibroblast growth factor receptor binding|integrin binding|extracellular region|extracellular space|nucleus|cytosol|cell cortex|growth factor activity|heparin binding|positive regulation of cell proliferation|fibroblast growth factor receptor signaling pathway|positive regulation of endothelial cell migration|cell differentiation|lung devel…	oas04010,oas04014,oas04015,oas04151,oas04390,oas04810,oas05200,oas05218,oas05224,oas05226	MAPK signaling pathway|Ras signaling pathway|Rap1 signaling pathway|PI3K-Akt signaling pathway|Hippo signaling pathway|Regulation of actin cytoskeleton|Pathways in cancer|Melanoma|Breast cancer|Gastric cancer
FGF21	22.6547	33.6999	11.6095	0.344442	-1.53767	0.00138657	0.0194582	Down	0.286753	0.258521	0.463976	1.21302	0.763101	0.942541	GeneID:101108510	fibroblast growth factor 21			oas04010,oas04014,oas04015,oas04151,oas04714,oas04810,oas05200,oas05218,oas05224,oas05226	MAPK signaling pathway|Ras signaling pathway|Rap1 signaling pathway|PI3K-Akt signaling pathway|Thermogenesis|Regulation of actin cytoskeleton|Pathways in cancer|Melanoma|Breast cancer|Gastric cancer
FGF5	42.3926	60.0489	24.7362	0.412492	-1.27756	0.00422604	0.0431293	Down	0.715064	0.191012	0.28925	0.56016	0.959591	1.36116	GeneID:100642180	fibroblast growth factor 5	GO:0005104,GO:0005576,GO:0008083,GO:0008284,GO:0008543,GO:0010001,GO:0023019,GO:0051781	fibroblast growth factor receptor binding|extracellular region|growth factor activity|positive regulation of cell proliferation|fibroblast growth factor receptor signaling pathway|glial cell differentiation|signal transduction involved in regulation of gene expression|positive regulation of cell division	oas04010,oas04014,oas04015,oas04151,oas04810,oas05200,oas05218,oas05224,oas05226	MAPK signaling pathway|Ras signaling pathway|Rap1 signaling pathway|PI3K-Akt signaling pathway|Regulation of actin cytoskeleton|Pathways in cancer|Melanoma|Breast cancer|Gastric cancer
FKBP1B	5.99219	9.68795	2.29642	0.238282	-2.06926	0.0432383	0.213425	Down	0.174042	0	0.0293339	0.292155	0.385964	0.173353	GeneID:101108378	FKBP prolyl isomerase 1B	GO:0000413,GO:0002027,GO:0003755,GO:0005102,GO:0005528,GO:0005737,GO:0006939,GO:0007204,GO:0009749,GO:0010033,GO:0010459,GO:0010880,GO:0010881,GO:0014808,GO:0016020,GO:0016529,GO:0019227,GO:0019855,GO:0030018,GO:0030073,GO:0030551,GO:0032515,GO:0033017,GO:0033197,GO:0034704,GO:0042098,GO:0042542,GO:0043231,GO:0044325,GO:0048680,GO:0051209,GO:0051280,GO:0051284,GO:0051480,GO:0051775,GO:0060314,GO:…	protein peptidyl-prolyl isomerization|regulation of heart rate|peptidyl-prolyl cis-trans isomerase activity|signaling receptor binding|FK506 binding|cytoplasm|smooth muscle contraction|positive regulation of cytosolic calcium ion concentration|response to glucose|response to organic substance|negative regulation of heart rate|regulation of release of sequestered calcium ion into cytosol by sarcop…
FOLR2	11.4864	16.6887	6.28415	0.377	-1.40736	0.0307073	0.172097	Down	0.171339	0.0953521	0.0962614	0.402666	0.292285	0.265474	GeneID:101121452	folate receptor beta	GO:0005542,GO:0005576,GO:0005886,GO:0006898,GO:0006954,GO:0007155,GO:0007342,GO:0008144,GO:0008284,GO:0009986,GO:0015884,GO:0031362,GO:0035036,GO:0038023,GO:0046655,GO:0050758,GO:0051870,GO:0061714,GO:1904447	folic acid binding|extracellular region|plasma membrane|receptor-mediated endocytosis|inflammatory response|cell adhesion|fusion of sperm to egg plasma membrane involved in single fertilization|drug binding|positive regulation of cell proliferation|cell surface|folic acid transport|anchored component of external side of plasma membrane|sperm-egg recognition|signaling receptor activity|folic acid …	oas01523,oas04144	Antifolate resistance|Endocytosis
FOXM1	8.15345	1.66499	14.6419	8.77602	3.13357	0.0011845	0.0173173	Up	0.0783237	0.1883	0.0792066	0.0157774	0	0.0234042	GeneID:101113491	forkhead box M1	GO:0000086,GO:0003677,GO:0003700,GO:0005634,GO:0006281,GO:0034698,GO:0043565,GO:0045944,GO:0051591	G2/M transition of mitotic cell cycle|DNA binding|DNA-binding transcription factor activity|nucleus|DNA repair|response to gonadotropin|sequence-specific DNA binding|positive regulation of transcription by RNA polymerase II|response to cAMP	oas04218	Cellular senescence
FRAT2	57.9616	37.0431	78.88	2.12959	1.09058	0.000244139	0.0052742	Up	1.03321	0.823006	1.12039	0.376137	0.48417	0.533163	GeneID:101108269	FRAT regulator of WNT signaling pathway 2	GO:0016055	Wnt signaling pathway	oas04310,oas05200,oas05224,oas05225,oas05226	Wnt signaling pathway|Pathways in cancer|Breast cancer|Hepatocellular carcinoma|Gastric cancer
FREM1	7.1201	0.333632	13.9066	38.7749	5.27705	0.00018857	0.00435275	Up	0.0556891	0.0474171	0.0140792	0.00280448	0	0	GeneID:101121399	FRAS1 related extracellular matrix 1			oas04512	ECM-receptor interaction
FUT1	22.3433	31.7181	12.9685	0.40847	-1.2917	0.00899145	0.0740043	Down	0.114701	0.229797	0.217489	0.620951	0.454926	0.2999	GeneID:101108248	fucosyltransferase 1 (H blood group)	GO:0005975,GO:0006486,GO:0008107,GO:0016021,GO:0032580,GO:0036065	carbohydrate metabolic process|protein glycosylation|galactoside 2-alpha-L-fucosyltransferase activity|integral component of membrane|Golgi cisterna membrane|fucosylation	oas00601,oas00603	Glycosphingolipid biosynthesis - lacto and neolacto series|Glycosphingolipid biosynthesis - globo and isoglobo series
FXYD2	3.83793	6.68089	0.994973	0.148946	-2.74714	0.0295321	0.167695	Down	0.0304477	0.0305	0.0307909	0.122666	0.311642	0.181964	GeneID:114118392	FXYD domain containing ion transport regulator 2	GO:0005216,GO:0006813,GO:0006814,GO:0016021	ion channel activity|potassium ion transport|sodium ion transport|integral component of membrane	oas04022,oas04024,oas04260,oas04261,oas04911,oas04918,oas04919,oas04960,oas04961,oas04964,oas04970,oas04972,oas04973,oas04974,oas04976,oas04978	cGMP-PKG signaling pathway|cAMP signaling pathway|Cardiac muscle contraction|Adrenergic signaling in cardiomyocytes|Insulin secretion|Thyroid hormone synthesis|Thyroid hormone signaling pathway|Aldosterone-regulated sodium reabsorption|Endocrine and other factor-regulated calcium reabsorption|Proximal tubule bicarbonate reclamation|Salivary secretion|Pancreatic secretion|Carbohydrate digestion an…
GAS7	430.254	267.508	593.001	2.21662	1.14836	8.8121e-11	1.78709e-08	Up	1.92565	1.75833	1.50066	0.616452	0.656003	1.05823	GeneID:101111467	growth arrest specific 7	GO:0001726,GO:0005737,GO:0005856,GO:0005884,GO:0005886,GO:0008092,GO:0008360,GO:0030041,GO:0030182,GO:0048812,GO:0051015,GO:0051017	ruffle|cytoplasm|cytoskeleton|actin filament|plasma membrane|cytoskeletal protein binding|regulation of cell shape|actin filament polymerization|neuron differentiation|neuron projection morphogenesis|actin filament binding|actin filament bundle assembly
GDF15	272.956	393.414	152.498	0.387636	-1.36722	0.00304648	0.0341071	Down	3.14631	2.37489	4.72785	11.85	9.72908	4.81115	GeneID:100913168	growth differentiation factor 15			oas04060	Cytokine-cytokine receptor interaction
GGCT	29.6921	16.6862	42.6981	2.5598	1.35603	0.00125803	0.0180394	Up	1.2579	0.840044	0.758786	0.46677	0.316229	0.329718	GeneID:101102474	gamma-glutamylcyclotransferase	GO:0001836,GO:0003839,GO:0005829,GO:0042803	release of cytochrome c from mitochondria|gamma-glutamylcyclotransferase activity|cytosol|protein homodimerization activity	oas00480	Glutathione metabolism
GJC2	42.9576	62.0856	23.8295	0.384128	-1.38034	0.000116644	0.00298828	Down	0.169524	0.0878355	0.165523	0.435688	0.353009	0.308594	GeneID:101122355	gap junction protein gamma 2	GO:0005922,GO:0007154,GO:0016021	connexin complex|cell communication|integral component of membrane
GPAT3	30.4224	18.3537	42.4911	2.31447	1.21068	0.00384123	0.0402733	Up	0.41497	0.554244	0.299748	0.228879	0.151691	0.1673	GeneID:101119394	glycerol-3-phosphate acyltransferase 3	GO:0003841,GO:0004366,GO:0005783,GO:0005789,GO:0006654,GO:0016021,GO:0016024,GO:0019432,GO:0032006,GO:0102420	1-acylglycerol-3-phosphate O-acyltransferase activity|glycerol-3-phosphate O-acyltransferase activity|endoplasmic reticulum|endoplasmic reticulum membrane|phosphatidic acid biosynthetic process|integral component of membrane|CDP-diacylglycerol biosynthetic process|triglyceride biosynthetic process|regulation of TOR signaling|sn-1-glycerol-3-phosphate C16:0-DCA-CoA acyl transferase activity	oas00561,oas00564	Glycerolipid metabolism|Glycerophospholipid metabolism
GPLD1	5.3332	9.34677	1.31963	0.141658	-2.81952	0.00983567	0.0791537	Down	0.00942292	0	0.00952914	0.042708	0.0482233	0.0422355	GeneID:101119000	glycosylphosphatidylinositol specific phospholipase D1	GO:0001503,GO:0002042,GO:0002062,GO:0002430,GO:0004621,GO:0005615,GO:0005737,GO:0006507,GO:0008285,GO:0008286,GO:0009749,GO:0010595,GO:0010694,GO:0010867,GO:0010897,GO:0010907,GO:0010983,GO:0017080,GO:0031012,GO:0032869,GO:0034364,GO:0035690,GO:0035774,GO:0043065,GO:0043231,GO:0045919,GO:0046470,GO:0051044,GO:0051047,GO:0070633,GO:0071277,GO:0071397,GO:0071401,GO:0071467,GO:1900076	ossification|cell migration involved in sprouting angiogenesis|chondrocyte differentiation|complement receptor mediated signaling pathway|glycosylphosphatidylinositol phospholipase D activity|extracellular space|cytoplasm|GPI anchor release|negative regulation of cell proliferation|insulin receptor signaling pathway|response to glucose|positive regulation of endothelial cell migration|positive re…	oas00563	Glycosylphosphatidylinositol (GPI)-anchor biosynthesis
GPR35	31.7605	19.3686	44.1524	2.27956	1.18875	0.00460425	0.045485	Up	0.510011	0.601045	0.894996	0.377705	0.32242	0.179292	GeneID:101103941	G protein-coupled receptor 35	GO:0004930,GO:0005886,GO:0005887,GO:0007010,GO:0007186,GO:0007204,GO:0016494,GO:0035025,GO:0051482,GO:0070098,GO:1901386,GO:1904456	G protein-coupled receptor activity|plasma membrane|integral component of plasma membrane|cytoskeleton organization|G protein-coupled receptor signaling pathway|positive regulation of cytosolic calcium ion concentration|C-X-C chemokine receptor activity|positive regulation of Rho protein signal transduction|positive regulation of cytosolic calcium ion concentration involved in phospholipase C-act…	oas04080	Neuroactive ligand-receptor interaction
GSG1L	41.1917	62.1484	20.2349	0.325603	-1.61882	0.000837096	0.013458	Down	0.411446	0.468357	0.264781	1.7518	1.45481	0.316678	GeneID:101120720	GSG1 like	GO:0005886,GO:0030054,GO:0098685,GO:0098978,GO:0099061,GO:0099149,GO:2000311	plasma membrane|cell junction|Schaffer collateral - CA1 synapse|glutamatergic synapse|integral component of postsynaptic density membrane|regulation of postsynaptic neurotransmitter receptor internalization|regulation of AMPA receptor activity
GSTO2	7.33545	11.3508	3.32007	0.292342	-1.77427	0.029913	0.169181	Down	0.0621297	0.0829821	0.0628301	0.208588	0.275564	0.226908	GeneID:101115496	glutathione S-transferase omega 2	GO:0004364,GO:0005829,GO:0006805,GO:0016491,GO:0019852,GO:0042802,GO:0045174,GO:0050610,GO:0055114,GO:0070062,GO:0071243,GO:1901687	glutathione transferase activity|cytosol|xenobiotic metabolic process|oxidoreductase activity|L-ascorbic acid metabolic process|identical protein binding|glutathione dehydrogenase (ascorbate) activity|methylarsonate reductase activity|oxidation-reduction process|extracellular exosome|cellular response to arsenic-containing substance|glutathione derivative biosynthetic process	oas00480,oas00980,oas00982,oas00983,oas01524,oas05200,oas05204,oas05225,oas05418	Glutathione metabolism|Metabolism of xenobiotics by cytochrome P450|Drug metabolism - cytochrome P450|Drug metabolism - other enzymes|Platinum drug resistance|Pathways in cancer|Chemical carcinogenesis|Hepatocellular carcinoma|Fluid shear stress and atherosclerosis
HEY1	25.5447	12.6733	38.4161	3.03108	1.59983	0.0013624	0.0192253	Up	0.529072	0.320454	0.584807	0.0619624	0.151123	0.257362	GeneID:101111557	hes related family bHLH transcription factor with YRPW motif 1	GO:0000977,GO:0001077,GO:0001078,GO:0001525,GO:0001568,GO:0003714,GO:0005634,GO:0007219,GO:0007507,GO:0008134,GO:0030154,GO:0035939,GO:0043565,GO:0045746,GO:0045944,GO:0046983,GO:0050767,GO:0060412,GO:1990837,GO:2000678,GO:2000820	RNA polymerase II regulatory region sequence-specific DNA binding|proximal promoter DNA-binding transcription activator activity, RNA polymerase II-specific|proximal promoter DNA-binding transcription repressor activity, RNA polymerase II-specific|angiogenesis|blood vessel development|transcription corepressor activity|nucleus|Notch signaling pathway|heart development|transcription factor binding…	oas05165,oas05200,oas05224	Human papillomavirus infection|Pathways in cancer|Breast cancer
HEYL	7.65446	2.67026	12.6387	4.73039	2.24196	0.00860201	0.0715792	Up	0.0616094	0.131145	0.101244	0.0155131	0.0236472	0.0230122	GeneID:101119343	hes related family bHLH transcription factor with YRPW motif-like	GO:0000977,GO:0001077,GO:0001078,GO:0001568,GO:0003714,GO:0005634,GO:0007219,GO:0007507,GO:0008134,GO:0030154,GO:0035939,GO:0043565,GO:0045944,GO:0046983,GO:0050767,GO:0060412,GO:1990837	RNA polymerase II regulatory region sequence-specific DNA binding|proximal promoter DNA-binding transcription activator activity, RNA polymerase II-specific|proximal promoter DNA-binding transcription repressor activity, RNA polymerase II-specific|blood vessel development|transcription corepressor activity|nucleus|Notch signaling pathway|heart development|transcription factor binding|cell differe…	oas05165,oas05200,oas05224	Human papillomavirus infection|Pathways in cancer|Breast cancer
HHEX	22.7266	13.9991	31.4542	2.24649	1.16767	0.0200731	0.131438	Up	0.582572	0.34699	0.573217	0.237876	0.0966943	0.329342	GeneID:101104445	hematopoietically expressed homeobox	GO:0000122,GO:0000977,GO:0000978,GO:0000981,GO:0001078,GO:0001227,GO:0005634,GO:0005737,GO:0006406,GO:0008134,GO:0008190,GO:0008283,GO:0008301,GO:0009611,GO:0009952,GO:0010621,GO:0010944,GO:0016055,GO:0016525,GO:0016973,GO:0017025,GO:0030154,GO:0030177,GO:0030183,GO:0030948,GO:0032993,GO:0034504,GO:0042803,GO:0043434,GO:0043565,GO:0044212,GO:0045736,GO:0045892,GO:0045944,GO:0070491,GO:0071103	negative regulation of transcription by RNA polymerase II|RNA polymerase II regulatory region sequence-specific DNA binding|RNA polymerase II proximal promoter sequence-specific DNA binding|DNA-binding transcription factor activity, RNA polymerase II-specific|proximal promoter DNA-binding transcription repressor activity, RNA polymerase II-specific|DNA-binding transcription repressor activity, RN…	oas04950,oas05202	Maturity onset diabetes of the young|Transcriptional misregulation in cancer
HMMR	34.3989	15.3409	53.4569	3.48267	1.80019	2.2003e-05	0.000782844	Up	0.435342	0.612204	0.304788	0.11805	0.0942586	0.175116	GeneID:443128	hyaluronan mediated motility receptor	GO:0005540,GO:0005813,GO:0005829,GO:0005886,GO:0009986,GO:0010389,GO:0015630,GO:0016020,GO:0030214	hyaluronic acid binding|centrosome|cytosol|plasma membrane|cell surface|regulation of G2/M transition of mitotic cell cycle|microtubule cytoskeleton|membrane|hyaluronan catabolic process	oas04512	ECM-receptor interaction
HR	47.9164	64.7291	31.1036	0.48088	-1.05625	0.00134246	0.0190005	Down	0.204264	0.114784	0.151146	0.326162	0.28556	0.362251	GeneID:443241	HR lysine demethylase and nuclear receptor corepressor	GO:0000785,GO:0000976,GO:0003677,GO:0003700,GO:0003714,GO:0005634,GO:0005654,GO:0006355,GO:0016491,GO:0016604,GO:0031490,GO:0032454,GO:0033169,GO:0045892,GO:0046872	chromatin|transcription regulatory region sequence-specific DNA binding|DNA binding|DNA-binding transcription factor activity|transcription corepressor activity|nucleus|nucleoplasm|regulation of transcription, DNA-templated|oxidoreductase activity|nuclear body|chromatin DNA binding|histone demethylase activity (H3-K9 specific)|histone H3-K9 demethylation|negative regulation of transcription, DNA-…
HSH2D	119.673	174.78	64.5661	0.369462	-1.4365	0.0119678	0.0907074	Down	1.52818	0.981287	1.32746	4.14391	4.95311	1.28796	GeneID:101117244	hematopoietic SH2 domain containing	GO:0002903,GO:0005070,GO:0005634,GO:0005737,GO:0005739,GO:0005829,GO:0007165,GO:0042110,GO:0051902	negative regulation of B cell apoptotic process|SH3/SH2 adaptor activity|nucleus|cytoplasm|mitochondrion|cytosol|signal transduction|T cell activation|negative regulation of mitochondrial depolarization
HYLS1	37.6817	51.4216	23.9419	0.465187	-1.10412	0.00365429	0.0388878	Down	0.195273	0.391218	0.355454	0.57692	0.839447	0.609437	GeneID:101112773	HYLS1 centriolar and ciliogenesis associated	GO:0005634,GO:0005813,GO:0005814,GO:0005829,GO:0005886,GO:0005929,GO:0060271,GO:0097730	nucleus|centrosome|centriole|cytosol|plasma membrane|cilium|cilium assembly|non-motile cilium
ID4	522.403	318.369	726.436	2.28173	1.19013	1.48715e-20	2.11116e-17	Up	8.74554	8.16509	8.24295	3.05128	3.77945	4.16759	GeneID:101122061	inhibitor of DNA binding 4, HLH protein			oas04350,oas04550	TGF-beta signaling pathway|Signaling pathways regulating pluripotency of stem cells
IGF2	38.3363	19.3464	57.3263	2.96283	1.56698	2.34084e-05	0.000824581	Up	0.636897	0.5084	0.583694	0.230531	0.132414	0.218068	GeneID:443325	insulin like growth factor 2	GO:0000122,GO:0001503,GO:0001701,GO:0001892,GO:0005178,GO:0005179,GO:0005615,GO:0006006,GO:0008083,GO:0008284,GO:0031056,GO:0051147,GO:0051781,GO:0060669	negative regulation of transcription by RNA polymerase II|ossification|in utero embryonic development|embryonic placenta development|integrin binding|hormone activity|extracellular space|glucose metabolic process|growth factor activity|positive regulation of cell proliferation|regulation of histone modification|regulation of muscle cell differentiation|positive regulation of cell division|embryon…	oas04010,oas04014,oas04151,oas05200,oas05205,oas05225	MAPK signaling pathway|Ras signaling pathway|PI3K-Akt signaling pathway|Pathways in cancer|Proteoglycans in cancer|Hepatocellular carcinoma
IGFBP5	4418.29	5931.09	2905.48	0.489873	-1.02952	1.35353e-06	7.59476e-05	Down	11.8349	12.8447	13.9394	29.3226	30.7374	18.7491	GeneID:443133	insulin like growth factor binding protein 5	GO:0001558,GO:0001968,GO:0005615,GO:0031994,GO:0031995,GO:0060416	regulation of cell growth|fibronectin binding|extracellular space|insulin-like growth factor I binding|insulin-like growth factor II binding|response to growth hormone
IL18R1	60.2716	86.4445	34.0986	0.394711	-1.34113	1.5235e-05	0.000594165	Down	0.471146	0.259576	0.488368	1.22192	0.95241	0.903369	GeneID:101102552	interleukin 18 receptor 1	GO:0004908,GO:0005886,GO:0006954,GO:0006955,GO:0007165,GO:0016021,GO:0030101,GO:0032729,GO:0035655,GO:0038023,GO:0042007,GO:0042008,GO:0045063,GO:0051092,GO:0071345,GO:0120163,GO:1901224,GO:2000556	interleukin-1 receptor activity|plasma membrane|inflammatory response|immune response|signal transduction|integral component of membrane|natural killer cell activation|positive regulation of interferon-gamma production|interleukin-18-mediated signaling pathway|signaling receptor activity|interleukin-18 binding|interleukin-18 receptor activity|T-helper 1 cell differentiation|positive regulation of…	oas04060,oas04668,oas05321	Cytokine-cytokine receptor interaction|TNF signaling pathway|Inflammatory bowel disease (IBD)
IL18RAP	23.1741	37.4038	8.94441	0.239261	-2.06334	0.000166825	0.00398694	Down	0.163228	0.13378	0.105044	0.881793	0.561961	0.236484	GeneID:101109262	interleukin 18 receptor accessory protein	GO:0005886,GO:0006954,GO:0006955,GO:0008283,GO:0032609,GO:0032635,GO:0035655,GO:0035744,GO:0042008,GO:0042119,GO:0045092,GO:0045954,GO:0051092,GO:0070301	plasma membrane|inflammatory response|immune response|cell proliferation|interferon-gamma production|interleukin-6 production|interleukin-18-mediated signaling pathway|T-helper 1 cell cytokine production|interleukin-18 receptor activity|neutrophil activation|interleukin-18 receptor complex|positive regulation of natural killer cell mediated cytotoxicity|positive regulation of NF-kappaB transcript…	oas04060,oas05321	Cytokine-cytokine receptor interaction|Inflammatory bowel disease (IBD)
IL1RN	12.1543	17.6869	6.62167	0.374606	-1.41655	0.042074	0.209823	Down	0.0812023	0.0348609	0.117311	0.362196	0.130606	0.127099	GeneID:780505	interleukin 1 receptor antagonist	GO:0001660,GO:0002439,GO:0005125,GO:0005149,GO:0005150,GO:0005151,GO:0005615,GO:0006629,GO:0007565,GO:0007613,GO:0014050,GO:0014823,GO:0019221,GO:0019233,GO:0019752,GO:0030073,GO:0030336,GO:0030593,GO:0031982,GO:0032755,GO:0034115,GO:0042493,GO:0042594,GO:0043066,GO:0043123,GO:0043507,GO:0045352,GO:0045353,GO:0045837,GO:0046330,GO:0051384,GO:0070555,GO:0070670,GO:0071222,GO:0071874,GO:2000660	fever generation|chronic inflammatory response to antigenic stimulus|cytokine activity|interleukin-1 receptor binding|interleukin-1, type I receptor binding|interleukin-1, type II receptor binding|extracellular space|lipid metabolic process|female pregnancy|memory|negative regulation of glutamate secretion|response to activity|cytokine-mediated signaling pathway|sensory perception of pain|carboxy…	oas04060	Cytokine-cytokine receptor interaction
INA	17.4629	7.00113	27.9246	3.98457	1.99443	0.000582537	0.0101718	Up	0.171286	0.317424	0.233843	0.0776329	0.0262975	0.0767739	GeneID:101115747	internexin neuronal intermediate filament protein alpha	GO:0005200,GO:0005615,GO:0005654,GO:0005883,GO:0021762,GO:0030154,GO:0031965,GO:0036464,GO:0043209,GO:0045111,GO:0060052,GO:0098685,GO:0098794,GO:0098973,GO:0099184,GO:1990830	structural constituent of cytoskeleton|extracellular space|nucleoplasm|neurofilament|substantia nigra development|cell differentiation|nuclear membrane|cytoplasmic ribonucleoprotein granule|myelin sheath|intermediate filament cytoskeleton|neurofilament cytoskeleton organization|Schaffer collateral - CA1 synapse|postsynapse|structural constituent of postsynaptic actin cytoskeleton|structural const…
INHBE	641.8	1030.26	253.337	0.245919	-2.02374	3.81364e-07	2.65384e-05	Down	4.50631	2.43161	2.63104	16.061	14.7672	7.99745	GeneID:101121588	inhibin subunit beta E	GO:0005125,GO:0005160,GO:0005179,GO:0005615,GO:0008083,GO:0010862,GO:0042981,GO:0043408,GO:0048468,GO:0060395	cytokine activity|transforming growth factor beta receptor binding|hormone activity|extracellular space|growth factor activity|positive regulation of pathway-restricted SMAD protein phosphorylation|regulation of apoptotic process|regulation of MAPK cascade|cell development|SMAD protein signal transduction	oas04060,oas04350,oas04550	Cytokine-cytokine receptor interaction|TGF-beta signaling pathway|Signaling pathways regulating pluripotency of stem cells
INPP5J	12.0128	19.3885	4.63705	0.239367	-2.06271	0.00454998	0.0452638	Down	0.0307189	0.0184631	0.0372783	0.123759	0.194939	0.0428364	GeneID:101103674	inositol polyphosphate-5-phosphatase J	GO:0001726,GO:0004439,GO:0004445,GO:0005737,GO:0005829,GO:0005886,GO:0006661,GO:0010977,GO:0017124,GO:0030426,GO:0031115,GO:0033137,GO:0034485,GO:0043198,GO:0043647,GO:0046855,GO:0046856,GO:0052658,GO:0052659	ruffle|phosphatidylinositol-4,5-bisphosphate 5-phosphatase activity|inositol-polyphosphate 5-phosphatase activity|cytoplasm|cytosol|plasma membrane|phosphatidylinositol biosynthetic process|negative regulation of neuron projection development|SH3 domain binding|growth cone|negative regulation of microtubule polymerization|negative regulation of peptidyl-serine phosphorylation|phosphatidylinositol…	oas00562,oas04070	Inositol phosphate metabolism|Phosphatidylinositol signaling system
IQCF1	12.9627	18.6776	7.24778	0.388945	-1.36236	0.0433392	0.213478	Down	0.367109	0.0525343	0.159106	0.581033	0.322069	0.574604	GeneID:101115577	IQ motif containing F1	GO:0001669,GO:0005516,GO:0060474,GO:2000344	acrosomal vesicle|calmodulin binding|positive regulation of flagellated sperm motility involved in capacitation|positive regulation of acrosome reaction
IQCN	180.605	246.556	114.655	0.465053	-1.10453	0.021814	0.138927	Down	0.732465	0.562128	0.758643	1.89193	1.87425	0.647198	GeneID:101111020	IQ motif containing N	GO:0005634,GO:0005739	nucleus|mitochondrion
IQGAP3	31.2601	15.015	47.5053	3.16267	1.66114	0.000408119	0.0077663	Up	0.202905	0.321424	0.152701	0.0285159	0.0821058	0.103401	GeneID:101108447	IQ motif containing GTPase activating protein 3	GO:0000082,GO:0000187,GO:0005516,GO:0005829,GO:0005911,GO:0007265,GO:0008361,GO:0010628,GO:0010629,GO:0016328,GO:0017048,GO:0033601,GO:0043087,GO:0070371,GO:0070856,GO:0071310	G1/S transition of mitotic cell cycle|activation of MAPK activity|calmodulin binding|cytosol|cell-cell junction|Ras protein signal transduction|regulation of cell size|positive regulation of gene expression|negative regulation of gene expression|lateral plasma membrane|Rho GTPase binding|positive regulation of mammary gland epithelial cell proliferation|regulation of GTPase activity|ERK1 and ERK2…	oas04810	Regulation of actin cytoskeleton
ISG15	40.6326	58.0826	23.1827	0.399368	-1.32421	0.00019034	0.00438646	Down	1.17578	0.724801	1.2805	2.41402	2.91605	2.61252	GeneID:443057	ISG15 ubiquitin-like modifier	GO:0005576,GO:0005737,GO:0019941,GO:0030501,GO:0031386,GO:0031397,GO:0032020,GO:0032649,GO:0034340,GO:0042742,GO:0045071,GO:0045648,GO:0051607	extracellular region|cytoplasm|modification-dependent protein catabolic process|positive regulation of bone mineralization|protein tag|negative regulation of protein ubiquitination|ISG15-protein conjugation|regulation of interferon-gamma production|response to type I interferon|defense response to bacterium|negative regulation of viral genome replication|positive regulation of erythrocyte differe…	oas04622,oas05165,oas05169	RIG-I-like receptor signaling pathway|Human papillomavirus infection|Epstein-Barr virus infection
ISG20	22.1431	31.3597	12.9265	0.41225	-1.27841	0.00966612	0.0782774	Down	0.381368	0.254682	0.610639	1.28037	0.715627	1.01296	GeneID:101116513	interferon stimulated exonuclease gene 20	GO:0000175,GO:0000738,GO:0004527,GO:0005634,GO:0005654,GO:0005730,GO:0005737,GO:0006364,GO:0006401,GO:0008283,GO:0008310,GO:0008859,GO:0009615,GO:0015030,GO:0016605,GO:0030619,GO:0030620,GO:0034511,GO:0045071,GO:0046872,GO:0051607,GO:0060337	3'-5'-exoribonuclease activity|DNA catabolic process, exonucleolytic|exonuclease activity|nucleus|nucleoplasm|nucleolus|cytoplasm|rRNA processing|RNA catabolic process|cell proliferation|single-stranded DNA 3'-5' exodeoxyribonuclease activity|exoribonuclease II activity|response to virus|Cajal body|PML body|U1 snRNA binding|U2 snRNA binding|U3 snoRNA binding|negative regulation of viral genome re…
ITGA8	441.037	266.117	615.957	2.31479	1.21088	4.5011e-19	3.62252e-16	Up	2.7767	2.80477	3.09491	1.19456	1.48529	1.06552	GeneID:101117689	integrin subunit alpha 8			oas04151,oas04510,oas04512,oas04514,oas04810,oas05165,oas05410,oas05412,oas05414	PI3K-Akt signaling pathway|Focal adhesion|ECM-receptor interaction|Cell adhesion molecules (CAMs)|Regulation of actin cytoskeleton|Human papillomavirus infection|Hypertrophic cardiomyopathy (HCM)|Arrhythmogenic right ventricular cardiomyopathy (ARVC)|Dilated cardiomyopathy (DCM)
ITGAX	38.4798	57.4029	19.5568	0.340753	-1.5532	4.61209e-05	0.00141717	Down	0.182476	0.174842	0.112324	0.599309	0.389781	0.387216	GeneID:101106739	integrin subunit alpha X	GO:0005886,GO:0007155,GO:0007229,GO:0008305,GO:0009887,GO:0009986,GO:0016020,GO:0019221,GO:0030198,GO:0030667,GO:0034113,GO:0038023,GO:0043312,GO:0046872,GO:0050900,GO:0070821,GO:0101003	plasma membrane|cell adhesion|integrin-mediated signaling pathway|integrin complex|animal organ morphogenesis|cell surface|membrane|cytokine-mediated signaling pathway|extracellular matrix organization|secretory granule membrane|heterotypic cell-cell adhesion|signaling receptor activity|neutrophil degranulation|metal ion binding|leukocyte migration|tertiary granule membrane|ficolin-1-rich granule…	oas04610,oas04810,oas05152	Complement and coagulation cascades|Regulation of actin cytoskeleton|Tuberculosis
KCNE4	66.0395	90.7898	41.2892	0.455301	-1.13511	0.000527441	0.00945012	Down	0.635195	0.201996	0.428237	0.96472	0.939094	0.863662	GeneID:101120989	potassium voltage-gated channel subfamily E regulatory subunit 4	GO:0005249,GO:0015459,GO:0016021,GO:0016324,GO:0044325,GO:0060307,GO:0071435,GO:0086005,GO:0086011,GO:0086091,GO:0098915,GO:1902260	voltage-gated potassium channel activity|potassium channel regulator activity|integral component of membrane|apical plasma membrane|ion channel binding|regulation of ventricular cardiac muscle cell membrane repolarization|potassium ion export|ventricular cardiac muscle cell action potential|membrane repolarization during action potential|regulation of heart rate by cardiac conduction|membrane rep…
KCNJ14	46.3146	67.7784	24.8508	0.366806	-1.44691	2.02755e-05	0.000734262	Down	0.288962	0.227432	0.260911	0.831544	0.760532	0.524243	GeneID:101106197	potassium voltage-gated channel subfamily J member 14	GO:0005242,GO:0005886,GO:0008076,GO:0010107,GO:0030425,GO:0034765,GO:0043025	inward rectifier potassium channel activity|plasma membrane|voltage-gated potassium channel complex|potassium ion import|dendrite|regulation of ion transmembrane transport|neuronal cell body	oas04725,oas04921	Cholinergic synapse|Oxytocin signaling pathway
KCNJ15	412.278	591.509	233.046	0.393982	-1.3438	0.0419347	0.209541	Down	1.38658	1.696	2.06641	5.90225	5.94573	1.24298	GeneID:101117981	potassium voltage-gated channel subfamily J member 15	GO:0005242,GO:0005886,GO:0005887,GO:0006813,GO:0010107,GO:0015467,GO:0034765	inward rectifier potassium channel activity|plasma membrane|integral component of plasma membrane|potassium ion transport|potassium ion import|G-protein activated inward rectifier potassium channel activity|regulation of ion transmembrane transport	oas04971	Gastric acid secretion
KCNMB3	12.7645	6.34157	19.1875	3.02687	1.59783	0.0263595	0.156046	Up	0.662258	0.357214	0.463655	0	0.234638	0.253707	GeneID:101109757	potassium calcium-activated channel subfamily M regulatory beta subunit 3	GO:0005513,GO:0008076,GO:0015269,GO:0015459,GO:0019228	detection of calcium ion|voltage-gated potassium channel complex|calcium-activated potassium channel activity|potassium channel regulator activity|neuronal action potential	oas04022,oas04270,oas04911	cGMP-PKG signaling pathway|Vascular smooth muscle contraction|Insulin secretion
KCNT2	27.1266	37.7128	16.5405	0.439013	-1.18766	0.00591105	0.0544537	Down	0.10632	0.0665642	0.0492793	0.174012	0.163233	0.167674	GeneID:101115980	potassium sodium-activated channel subfamily T member 2	GO:0005228,GO:0005524,GO:0005886,GO:0015271,GO:0016021,GO:0042391,GO:0070089,GO:0071435	intracellular sodium activated potassium channel activity|ATP binding|plasma membrane|outward rectifier potassium channel activity|integral component of membrane|regulation of membrane potential|chloride-activated potassium channel activity|potassium ion export
KIF11	61.7744	25.3472	98.2017	3.87181	1.95301	6.25319e-07	3.98073e-05	Up	0.3622	0.959724	0.407637	0.117679	0.119588	0.209478	GeneID:101102946	kinesin family member 11	GO:0000278,GO:0000922,GO:0003777,GO:0005524,GO:0005634,GO:0005819,GO:0005829,GO:0005871,GO:0005874,GO:0005876,GO:0006890,GO:0007018,GO:0007051,GO:0007052,GO:0007100,GO:0008017,GO:0008574,GO:0016020,GO:0016887,GO:0019886,GO:0019901,GO:0044877,GO:0046602,GO:0051301,GO:0072686,GO:0090307	mitotic cell cycle|spindle pole|microtubule motor activity|ATP binding|nucleus|spindle|cytosol|kinesin complex|microtubule|spindle microtubule|retrograde vesicle-mediated transport, Golgi to ER|microtubule-based movement|spindle organization|mitotic spindle organization|mitotic centrosome separation|microtubule binding|ATP-dependent microtubule motor activity, plus-end-directed|membrane|ATPase ac…
KIF14	15.6163	4.00122	27.2314	6.80026	2.76559	3.70891e-05	0.00119392	Up	0.113712	0.168751	0.0638852	0.0212091	0.00862129	0.0209744	GeneID:101107720	kinesin family member 14
KIF15	18.9635	9.00494	28.9221	3.20924	1.68223	0.00211301	0.0261833	Up	0.0764356	0.141649	0.115946	0.0192463	0.0312937	0.0532933	GeneID:101121554	kinesin family member 15	GO:0000278,GO:0003677,GO:0003774,GO:0003777,GO:0005524,GO:0005813,GO:0005819,GO:0005829,GO:0005871,GO:0005873,GO:0005874,GO:0006890,GO:0007018,GO:0008017,GO:0008283,GO:0016020,GO:0016887,GO:0019886	mitotic cell cycle|DNA binding|motor activity|microtubule motor activity|ATP binding|centrosome|spindle|cytosol|kinesin complex|plus-end kinesin complex|microtubule|retrograde vesicle-mediated transport, Golgi to ER|microtubule-based movement|microtubule binding|cell proliferation|membrane|ATPase activity|antigen processing and presentation of exogenous peptide antigen via MHC class II
KIF18B	5.32086	2.00114	8.64059	4.31416	2.10908	0.0356241	0.188536	Up	0.0502208	0.0862409	0.050787	0.021678	0.00734323	0.0142921	GeneID:101118461	kinesin family member 18B	GO:0000070,GO:0000235,GO:0000278,GO:0003774,GO:0003777,GO:0005524,GO:0005634,GO:0005737,GO:0005829,GO:0005871,GO:0005874,GO:0007018,GO:0007019,GO:0008017,GO:0008574,GO:0016604,GO:0016887,GO:0019894,GO:0035371,GO:0051301,GO:0051302,GO:0061673,GO:1990023,GO:1990752	mitotic sister chromatid segregation|astral microtubule|mitotic cell cycle|motor activity|microtubule motor activity|ATP binding|nucleus|cytoplasm|cytosol|kinesin complex|microtubule|microtubule-based movement|microtubule depolymerization|microtubule binding|ATP-dependent microtubule motor activity, plus-end-directed|nuclear body|ATPase activity|kinesin binding|microtubule plus-end|cell division|…
KIF1A	26.8122	44.7139	8.91056	0.199771	-2.32358	1.83738e-06	0.000100321	Down	0.0543625	0.020421	0.0171798	0.16426	0.135627	0.159059	GeneID:101103691	kinesin family member 1A	GO:0003774,GO:0003777,GO:0005524,GO:0005829,GO:0005871,GO:0005874,GO:0007018,GO:0008017,GO:0008021,GO:0008089,GO:0008574,GO:0016192,GO:0016887,GO:0022027,GO:0030424,GO:0030425,GO:0030705,GO:0042802,GO:0042803,GO:0043005,GO:0043025,GO:0098794,GO:0098840,GO:1904115,GO:1990048,GO:1990049	motor activity|microtubule motor activity|ATP binding|cytosol|kinesin complex|microtubule|microtubule-based movement|microtubule binding|synaptic vesicle|anterograde axonal transport|ATP-dependent microtubule motor activity, plus-end-directed|vesicle-mediated transport|ATPase activity|interkinetic nuclear migration|axon|dendrite|cytoskeleton-dependent intracellular transport|identical protein bin…
KIF20A	79.3802	27.654	131.106	4.73981	2.24483	0.00163188	0.0218998	Up	0.78141	1.87497	0.937236	0.173878	0.1116	0.470612	GeneID:101109352	kinesin family member 20A	GO:0000281,GO:0001578,GO:0003777,GO:0005524,GO:0005634,GO:0005654,GO:0005794,GO:0005819,GO:0005871,GO:0005874,GO:0007018,GO:0008017,GO:0015031,GO:0016887,GO:0019901,GO:0030496,GO:0032154,GO:0032465,GO:0045171,GO:0061952	mitotic cytokinesis|microtubule bundle formation|microtubule motor activity|ATP binding|nucleus|nucleoplasm|Golgi apparatus|spindle|kinesin complex|microtubule|microtubule-based movement|microtubule binding|protein transport|ATPase activity|protein kinase binding|midbody|cleavage furrow|regulation of cytokinesis|intercellular bridge|midbody abscission
KIF22	36.8548	16.6647	57.0448	3.42138	1.77458	0.000120392	0.00306838	Up	0.886019	1.00676	0.387824	0.199789	0.108283	0.35564	GeneID:101120211	kinesin family member 22	GO:0003677,GO:0003777,GO:0005524,GO:0005829,GO:0005874,GO:0006281,GO:0007018,GO:0007062,GO:0007080,GO:0008017,GO:0016607,GO:0051310,GO:0072686	DNA binding|microtubule motor activity|ATP binding|cytosol|microtubule|DNA repair|microtubule-based movement|sister chromatid cohesion|mitotic metaphase plate congression|microtubule binding|nuclear speck|metaphase plate congression|mitotic spindle	oas04914	Progesterone-mediated oocyte maturation
KIF4A	27.6331	12.3463	42.9198	3.47395	1.79658	0.00013017	0.00327641	Up	0.173333	0.405139	0.253192	0.0969884	0.065708	0.0767322	GeneID:101123442	kinesin family member 4A	GO:0000281,GO:0003677,GO:0003777,GO:0005524,GO:0005654,GO:0005829,GO:0005871,GO:0005874,GO:0006890,GO:0007018,GO:0007052,GO:0008017,GO:0016363,GO:0016887,GO:0019886,GO:0045171,GO:0051256	mitotic cytokinesis|DNA binding|microtubule motor activity|ATP binding|nucleoplasm|cytosol|kinesin complex|microtubule|retrograde vesicle-mediated transport, Golgi to ER|microtubule-based movement|mitotic spindle organization|microtubule binding|nuclear matrix|ATPase activity|antigen processing and presentation of exogenous peptide antigen via MHC class II|intercellular bridge|mitotic spindle mid…
KLHL29	223.731	298.492	148.97	0.499284	-1.00207	6.93715e-07	4.28173e-05	Down	1.17887	0.770692	0.853336	2.23096	2.00044	1.37197	GeneID:101104975	kelch like family member 29
KLHL40	12.3418	20.3634	4.32022	0.21192	-2.23841	0.000930388	0.0145329	Down	0.0346553	0.0578581	0.0584099	0.31414	0.224648	0.172591	GeneID:101119589	kelch like family member 40	GO:0005737,GO:0031397,GO:0031398,GO:0031463,GO:0031672,GO:0031674,GO:0032435,GO:0032436,GO:0048741,GO:0098528	cytoplasm|negative regulation of protein ubiquitination|positive regulation of protein ubiquitination|Cul3-RING ubiquitin ligase complex|A band|I band|negative regulation of proteasomal ubiquitin-dependent protein catabolic process|positive regulation of proteasomal ubiquitin-dependent protein catabolic process|skeletal muscle fiber development|skeletal muscle fiber differentiation
KNL1	27.6155	17.0131	38.2179	2.24502	1.16673	0.00998652	0.0797527	Up	0.0923344	0.159761	0.0707388	0.0507264	0.0372301	0.0557389	GeneID:101114616	kinetochore scaffold 1
KRT80	6.48871	10.338	2.63941	0.255927	-1.9662	0.0321725	0.177781	Down	0.0432241	0.0173194	0.00874226	0.0870697	0.0619377	0.120549	GeneID:101113319	keratin 80	GO:0005198,GO:0045095	structural molecule activity|keratin filament
L1CAM	33.8727	21.3498	46.3956	2.17301	1.1197	0.00639241	0.0576426	Up	0.29695	0.282074	0.139793	0.108289	0.0890851	0.132589	GeneID:101110032	L1 cell adhesion molecule			oas04360,oas04514	Axon guidance|Cell adhesion molecules (CAMs)
L3MBTL1	84.1752	116.594	51.7568	0.443912	-1.17165	0.000200059	0.00455048	Down	0.267768	0.290125	0.298418	0.781561	0.833395	0.315697	GeneID:101104848	L3MBTL histone methyl-lysine binding protein 1	GO:0000785,GO:0000793,GO:0003682,GO:0003700,GO:0005634,GO:0005654,GO:0005886,GO:0006325,GO:0007088,GO:0008270,GO:0030097,GO:0031491,GO:0031493,GO:0032093,GO:0035064,GO:0040029,GO:0042393,GO:0042802,GO:0045652,GO:0045892	chromatin|condensed chromosome|chromatin binding|DNA-binding transcription factor activity|nucleus|nucleoplasm|plasma membrane|chromatin organization|regulation of mitotic nuclear division|zinc ion binding|hemopoiesis|nucleosome binding|nucleosomal histone binding|SAM domain binding|methylated histone binding|regulation of gene expression, epigenetic|histone binding|identical protein binding|regu…
LAMC3	37.5066	50.7728	24.2404	0.477289	-1.06707	0.00533081	0.0506874	Down	0.0874126	0.115214	0.134923	0.231687	0.315498	0.160387	GeneID:101122429	laminin subunit gamma 3	GO:0000904,GO:0005198,GO:0005576,GO:0005604,GO:0007155,GO:0007601,GO:0014002,GO:0016020,GO:0030198,GO:0031012,GO:0060041	cell morphogenesis involved in differentiation|structural molecule activity|extracellular region|basement membrane|cell adhesion|visual perception|astrocyte development|membrane|extracellular matrix organization|extracellular matrix|retina development in camera-type eye	oas04151,oas04510,oas04512,oas05145,oas05146,oas05165,oas05200,oas05222	PI3K-Akt signaling pathway|Focal adhesion|ECM-receptor interaction|Toxoplasmosis|Amoebiasis|Human papillomavirus infection|Pathways in cancer|Small cell lung cancer
LMO2	3.824	0.667666	6.98033	10.4518	3.38568	0.0162906	0.114146	Up	0.0742047	0.130082	0.187603	0	0.0189877	0.0184778	GeneID:101103346	LIM domain only 2	GO:0001102,GO:0001228,GO:0005634,GO:0005667,GO:0042789,GO:0043425,GO:0046872,GO:0048037,GO:0070888,GO:0097067	RNA polymerase II activating transcription factor binding|DNA-binding transcription activator activity, RNA polymerase II-specific|nucleus|transcription factor complex|mRNA transcription by RNA polymerase II|bHLH transcription factor binding|metal ion binding|cofactor binding|E-box binding|cellular response to thyroid hormone stimulus	oas05202	Transcriptional misregulation in cancer
LOC101102413	2.33473	4.33696	0.332495	0.0821825	-3.60503	0.0383455	0.197947	Down	0	0	0.0199546	0.158993	0.040393	0.0589625	GeneID:101102413	haptoglobin	GO:0002376,GO:0005615,GO:0006953,GO:0016209,GO:0030492,GO:0042742	immune system process|extracellular space|acute-phase response|antioxidant activity|hemoglobin binding|defense response to bacterium
LOC101102857	3.49852	6.0099	0.987138	0.165041	-2.59911	0.0479025	0.229428	Down	0.0320949	0	0.0162284	0.129303	0.0985506	0.063936	GeneID:101102857	elongation factor 1-alpha 1	GO:0003746,GO:0003924,GO:0005525,GO:0005634,GO:0005730,GO:0005737,GO:0005886,GO:0006412,GO:0006414,GO:0071364	translation elongation factor activity|GTPase activity|GTP binding|nucleus|nucleolus|cytoplasm|plasma membrane|translation|translational elongation|cellular response to epidermal growth factor stimulus	oas03013,oas05134	RNA transport|Legionellosis
LOC101103238	26303.8	17059.1	35548.4	2.08383	1.05924	7.13953e-39	1.01353e-34	Up	553.118	626.629	665.339	290.221	312.267	281.835	GeneID:101103238	C-X-C motif chemokine 6	GO:0005615,GO:0006954,GO:0006955,GO:0008009,GO:0008201,GO:0030593,GO:0030595,GO:0042119,GO:0042742,GO:0061844,GO:0070098,GO:0071222	extracellular space|inflammatory response|immune response|chemokine activity|heparin binding|neutrophil chemotaxis|leukocyte chemotaxis|neutrophil activation|defense response to bacterium|antimicrobial humoral immune response mediated by antimicrobial peptide|chemokine-mediated signaling pathway|cellular response to lipopolysaccharide	oas04060,oas04062,oas04657,oas05133,oas05323	Cytokine-cytokine receptor interaction|Chemokine signaling pathway|IL-17 signaling pathway|Pertussis|Rheumatoid arthritis
LOC101104231	111.914	69.0114	154.816	2.24285	1.16533	4.99075e-05	0.0014947	Up	0.892428	0.819466	0.778933	0.240762	0.26098	0.603182	GeneID:101104231	calcium-dependent secretion activator 2	GO:0005654,GO:0008289,GO:0009267,GO:0015031,GO:0016082,GO:0030054,GO:0030659,GO:0042734,GO:0043231,GO:0045211,GO:0045921,GO:0046872,GO:0098688,GO:0098978,GO:1990504	nucleoplasm|lipid binding|cellular response to starvation|protein transport|synaptic vesicle priming|cell junction|cytoplasmic vesicle membrane|presynaptic membrane|intracellular membrane-bounded organelle|postsynaptic membrane|positive regulation of exocytosis|metal ion binding|parallel fiber to Purkinje cell synapse|glutamatergic synapse|dense core granule exocytosis
LOC101104661	1647.38	1078.02	2216.73	2.05627	1.04003	0.000288186	0.00601631	Up	56.055	58.7806	64.9475	22.5239	24.6163	39.9877	GeneID:101104661	growth-regulated protein homolog gamma	GO:0005615,GO:0006954,GO:0006955,GO:0008009,GO:0008083	extracellular space|inflammatory response|immune response|chemokine activity|growth factor activity	oas04060,oas04062,oas04621,oas04657,oas04668,oas05132,oas05134,oas05167	Cytokine-cytokine receptor interaction|Chemokine signaling pathway|NOD-like receptor signaling pathway|IL-17 signaling pathway|TNF signaling pathway|Salmonella infection|Legionellosis|Kaposi sarcoma-associated herpesvirus infection
LOC101106166	12.094	6.67359	17.5145	2.62617	1.39296	0.0330638	0.180667	Up	1.05199	0.468357	0.551627	0.353186	0.199398	0.232852	GeneID:101106166	60S ribosomal protein L10a	GO:0000184,GO:0000470,GO:0002181,GO:0003723,GO:0003735,GO:0005634,GO:0005829,GO:0005925,GO:0006412,GO:0006413,GO:0006614,GO:0016020,GO:0022625,GO:0042788,GO:0070062	nuclear-transcribed mRNA catabolic process, nonsense-mediated decay|maturation of LSU-rRNA|cytoplasmic translation|RNA binding|structural constituent of ribosome|nucleus|cytosol|focal adhesion|translation|translational initiation|SRP-dependent cotranslational protein targeting to membrane|membrane|cytosolic large ribosomal subunit|polysomal ribosome|extracellular exosome	oas03010	Ribosome
LOC101106541	49.4476	67.3502	31.5449	0.468153	-1.09495	0.00616877	0.0560999	Down	0.224273	0.267451	0.529203	0.527067	0.513756	1.12757	GeneID:101106541	uncharacterized LOC101106541	GO:0004859,GO:0005576	phospholipase inhibitor activity|extracellular region
LOC101106722	4.1714	1.0013	7.3415	7.32525	2.87288	0.0355534	0.188397	Up	0	0.113065	0.136972	0.0113682	0.0115527	0.0112424	GeneID:101106722	high mobility group protein B2	GO:0000400,GO:0000790,GO:0000793,GO:0001158,GO:0002437,GO:0003677,GO:0003690,GO:0003697,GO:0005615,GO:0005623,GO:0005634,GO:0005737,GO:0006265,GO:0006310,GO:0006334,GO:0006338,GO:0006357,GO:0006935,GO:0007283,GO:0007289,GO:0008134,GO:0008144,GO:0008301,GO:0008584,GO:0010628,GO:0010629,GO:0019904,GO:0032392,GO:0032496,GO:0042493,GO:0043388,GO:0044378,GO:0045087,GO:0045089,GO:0045944,GO:0048471,GO:…	four-way junction DNA binding|nuclear chromatin|condensed chromosome|enhancer sequence-specific DNA binding|inflammatory response to antigenic stimulus|DNA binding|double-stranded DNA binding|single-stranded DNA binding|extracellular space|cell|nucleus|cytoplasm|DNA topological change|DNA recombination|nucleosome assembly|chromatin remodeling|regulation of transcription by RNA polymerase II|chemo…
LOC101107096	12.9595	5.00649	20.9125	4.17623	2.0622	0.00126651	0.0181427	Up	0.0945093	0.111379	0.146173	0.0279967	0.028451	0.0276869	GeneID:101107096	adhesion G protein-coupled receptor E1	GO:0002250,GO:0004930,GO:0005509,GO:0005622,GO:0005887,GO:0007155,GO:0007166,GO:0007186,GO:0007189,GO:0009897	adaptive immune response|G protein-coupled receptor activity|calcium ion binding|intracellular|integral component of plasma membrane|cell adhesion|cell surface receptor signaling pathway|G protein-coupled receptor signaling pathway|adenylate cyclase-activating G protein-coupled receptor signaling pathway|external side of plasma membrane
LOC101107831	9.33142	13.6957	4.96718	0.362974	-1.46206	0.0493529	0.233701	Down	0.171491	0.147245	0.0495498	0.345449	0.451355	0.219617	GeneID:101107831	glutathione S-transferase Mu 1-like	GO:0004364,GO:0005737	glutathione transferase activity|cytoplasm	oas00480,oas00980,oas00982,oas00983,oas01524,oas05200,oas05204,oas05225,oas05418	Glutathione metabolism|Metabolism of xenobiotics by cytochrome P450|Drug metabolism - cytochrome P450|Drug metabolism - other enzymes|Platinum drug resistance|Pathways in cancer|Chemical carcinogenesis|Hepatocellular carcinoma|Fluid shear stress and atherosclerosis
LOC101108627	14.1488	22.3614	5.93613	0.26611	-1.90991	0.00411267	0.0422525	Down	0.157782	0.0658557	0.0132967	0.357563	0.269159	0.261931	GeneID:101108627	core histone macro-H2A.2	GO:0000122,GO:0000784,GO:0000786,GO:0000790,GO:0000977,GO:0001740,GO:0003677,GO:0005654,GO:0006325,GO:0006334,GO:0007420,GO:0007549,GO:0031490,GO:0044212,GO:0045618,GO:0045814,GO:0046982,GO:0070062,GO:0071169,GO:1901837	negative regulation of transcription by RNA polymerase II|nuclear chromosome, telomeric region|nucleosome|nuclear chromatin|RNA polymerase II regulatory region sequence-specific DNA binding|Barr body|DNA binding|nucleoplasm|chromatin organization|nucleosome assembly|brain development|dosage compensation|chromatin DNA binding|transcription regulatory region DNA binding|positive regulation of kerat…	oas04217,oas05034,oas05322	Necroptosis|Alcoholism|Systemic lupus erythematosus
LOC101109343	2.67367	5.01217	0.335156	0.0711305	-3.81339	0.0256297	0.153454	Down	0	0.0213713	0	0.171904	0.13102	0.0212502	GeneID:101109343	serpin B6-like	GO:0004867,GO:0005615,GO:0005737,GO:0010951	serine-type endopeptidase inhibitor activity|extracellular space|cytoplasm|negative regulation of endopeptidase activity	oas05146	Amoebiasis
LOC101109915	27.358	44.4367	10.2794	0.231377	-2.11168	2.08127e-05	0.000747992	Down	0.0322345	0.0251144	0.0543298	0.173154	0.22362	0.0856188	GeneID:101109915	2'-5'-oligoadenylate synthase 2	GO:0001730,GO:0003725,GO:0005524,GO:0005634,GO:0005654,GO:0005829,GO:0006401,GO:0009615,GO:0009617,GO:0046872,GO:0048471,GO:0051607,GO:0060337,GO:0060700,GO:1903487	2'-5'-oligoadenylate synthetase activity|double-stranded RNA binding|ATP binding|nucleus|nucleoplasm|cytosol|RNA catabolic process|response to virus|response to bacterium|metal ion binding|perinuclear region of cytoplasm|defense response to virus|type I interferon signaling pathway|regulation of ribonuclease activity|regulation of lactation	oas04621,oas05160,oas05162,oas05164,oas05168,oas05169	NOD-like receptor signaling pathway|Hepatitis C|Measles|Influenza A|Herpes simplex virus 1 infection|Epstein-Barr virus infection
LOC101110035	1.84101	3.68203	0	0.0497235	-4.32993	0.0282834	0.163816	Down	0	0	0	0.0961382	0.879282	0.0950744	GeneID:101110035	40S ribosomal protein S27-like			oas03010	Ribosome
LOC101110202	53.0875	75.1442	31.0309	0.413516	-1.27399	0.000835141	0.0134418	Down	0.860528	0.309022	0.361227	1.40637	1.47904	0.808608	GeneID:101110202	cytochrome P450 3A24-like	GO:0004497,GO:0005506,GO:0005789,GO:0020037,GO:0031090,GO:0070330	monooxygenase activity|iron ion binding|endoplasmic reticulum membrane|heme binding|organelle membrane|aromatase activity	oas00140,oas00591,oas00830,oas05204	Steroid hormone biosynthesis|Linoleic acid metabolism|Retinol metabolism|Chemical carcinogenesis
LOC101110922	22.8524	37.0803	8.62447	0.232594	-2.10412	0.000588767	0.0102554	Down	0.0681968	0.0455427	0.183908	0.663976	0.476977	0.135854	GeneID:101110922	cytochrome P450 26B1	GO:0001709,GO:0001768,GO:0001972,GO:0005506,GO:0005789,GO:0006805,GO:0006954,GO:0007140,GO:0007283,GO:0008401,GO:0009954,GO:0010628,GO:0016125,GO:0016709,GO:0020037,GO:0030326,GO:0031090,GO:0034653,GO:0043587,GO:0045580,GO:0048384,GO:0048387,GO:0055114,GO:0060349,GO:0061436,GO:0070268,GO:0071300,GO:2001037	cell fate determination|establishment of T cell polarity|retinoic acid binding|iron ion binding|endoplasmic reticulum membrane|xenobiotic metabolic process|inflammatory response|male meiotic nuclear division|spermatogenesis|retinoic acid 4-hydroxylase activity|proximal/distal pattern formation|positive regulation of gene expression|sterol metabolic process|oxidoreductase activity, acting on paire…	oas00830	Retinol metabolism
LOC101111623	34.174	48.0769	20.2711	0.421323	-1.247	0.00138771	0.0194582	Down	0.0503693	0.0840932	0.071312	0.12852	0.199344	0.160544	GeneID:101111623	AF4/FMR2 family member 3
LOC101112343	17.0064	24.3881	9.62477	0.394608	-1.34151	0.0200429	0.131438	Down	0.0721057	0.0722297	0.156254	0.290497	0.337383	0.133381	GeneID:101112343	cationic amino acid transporter 3-like	GO:0000064,GO:0005886,GO:0006865,GO:0015171,GO:0015181,GO:0015189,GO:0016021,GO:0097638,GO:1903352	L-ornithine transmembrane transporter activity|plasma membrane|amino acid transport|amino acid transmembrane transporter activity|arginine transmembrane transporter activity|L-lysine transmembrane transporter activity|integral component of membrane|L-arginine import across plasma membrane|L-ornithine transmembrane transport
LOC101112843	11.4357	6.3385	16.5328	2.60936	1.3837	0.0451989	0.219816	Up	0.206634	0.127378	0.0642963	0.0720414	0.0325379	0.0474961	GeneID:101112843	cationic amino acid transporter 3-like	GO:0000064,GO:0005886,GO:0006865,GO:0015171,GO:0015181,GO:0015189,GO:0016021,GO:0097638,GO:1903352	L-ornithine transmembrane transporter activity|plasma membrane|amino acid transport|amino acid transmembrane transporter activity|arginine transmembrane transporter activity|L-lysine transmembrane transporter activity|integral component of membrane|L-arginine import across plasma membrane|L-ornithine transmembrane transport
LOC101112936	4.81038	1.67148	7.94929	4.76137	2.25138	0.0350433	0.18667	Up	0.121167	0.0809167	0.122532	0.0135598	0.0413393	0.0134097	GeneID:101112936	interferon-activable protein 203	GO:0003677,GO:0005634,GO:0005737,GO:0006914,GO:0006915,GO:0006954,GO:0045087	DNA binding|nucleus|cytoplasm|autophagy|apoptotic process|inflammatory response|innate immune response	oas04621	NOD-like receptor signaling pathway
LOC101113041	102.049	8.00163	196.096	24.5039	4.61494	0.000727637	0.0120813	Up	0.133748	3.96911	5.7991	0.235743	0.0342239	0.133219	GeneID:101113041	acyl-coenzyme A thioesterase 9, mitochondrial	GO:0005739,GO:0006637,GO:0047617,GO:0052689	mitochondrion|acyl-CoA metabolic process|acyl-CoA hydrolase activity|carboxylic ester hydrolase activity
LOC101113346	4.0044	7.02166	0.987138	0.14129	-2.82326	0.0314828	0.175061	Down	0.0137825	0	0.00696891	0.0485855	0.0846407	0.013728	GeneID:101113346	schlafen family member 13	GO:0000049,GO:0004386,GO:0005524,GO:0005634,GO:0005654,GO:0005829,GO:0006974,GO:0008156,GO:0010942,GO:0016235,GO:0016887,GO:0043111,GO:0051607,GO:0090734,GO:2000134	tRNA binding|helicase activity|ATP binding|nucleus|nucleoplasm|cytosol|cellular response to DNA damage stimulus|negative regulation of DNA replication|positive regulation of cell death|aggresome|ATPase activity|replication fork arrest|defense response to virus|site of DNA damage|negative regulation of G1/S transition of mitotic cell cycle
LOC101113538	38.5281	62.1238	14.9323	0.240327	-2.05693	1.48525e-06	8.23615e-05	Down	0.455671	0.491566	0.638041	2.9655	2.51135	1.11722	GeneID:101113538	acyl-coenzyme A thioesterase THEM4-like	GO:0005743,GO:0005758,GO:0006631,GO:0006915,GO:0016290,GO:0032587,GO:0102991	mitochondrial inner membrane|mitochondrial intermembrane space|fatty acid metabolic process|apoptotic process|palmitoyl-CoA hydrolase activity|ruffle membrane|myristoyl-CoA hydrolase activity
LOC101115187	15.9755	7.33557	24.6154	3.35243	1.74521	0.00492133	0.047813	Up	0.224177	0.484583	0.167045	0.0713018	0.0603822	0.129274	GeneID:101115187	periphilin-1-like	GO:0003723,GO:0005654,GO:0005694,GO:0005794,GO:0005829,GO:0031424,GO:0045892	RNA binding|nucleoplasm|chromosome|Golgi apparatus|cytosol|keratinization|negative regulation of transcription, DNA-templated
LOC101115808	17.2673	6.34751	28.187	4.44282	2.15148	0.00023598	0.00514588	Up	0.143628	0.152867	0.0862406	0.0361652	0.036752	0.0134119	GeneID:101115808	ATP-binding cassette sub-family A member 9			oas02010	ABC transporters
LOC101116059	6.5071	10.6943	2.31993	0.217058	-2.20385	0.0194605	0.128567	Down	0.0184684	0.0185001	0.00622552	0.0682043	0.100816	0.0306589	GeneID:101116059	clathrin coat assembly protein AP180	GO:0005545,GO:0005886,GO:0005905,GO:0015031,GO:0019901,GO:0030136,GO:0030276,GO:0048268,GO:2000369	1-phosphatidylinositol binding|plasma membrane|clathrin-coated pit|protein transport|protein kinase binding|clathrin-coated vesicle|clathrin binding|clathrin coat assembly|regulation of clathrin-dependent endocytosis
LOC101117554	769.661	1040.8	498.526	0.478988	-1.06194	0.0122757	0.0923507	Down	15.2975	13.5653	13.2156	14.4813	33.4254	39.716	GeneID:101117554	tumor necrosis factor receptor superfamily member 12A	GO:0001525,GO:0001726,GO:0005886,GO:0006931,GO:0009986,GO:0016021,GO:0033209,GO:0043065,GO:0045765,GO:0045773,GO:0061041,GO:0097191,GO:2001238	angiogenesis|ruffle|plasma membrane|substrate-dependent cell migration, cell attachment to substrate|cell surface|integral component of membrane|tumor necrosis factor-mediated signaling pathway|positive regulation of apoptotic process|regulation of angiogenesis|positive regulation of axon extension|regulation of wound healing|extrinsic apoptotic signaling pathway|positive regulation of extrinsic …	oas04060	Cytokine-cytokine receptor interaction
LOC101118164	10.6806	17.384	3.97708	0.228891	-2.12727	0.0109424	0.0853974	Down	0.045925	0.0153346	0.123847	0.323786	0.423051	0.0609911	GeneID:101118164	L-threonine 3-dehydrogenase, mitochondrial	GO:0005739,GO:0006567,GO:0008743,GO:0019518,GO:0042802,GO:0050662	mitochondrion|threonine catabolic process|L-threonine 3-dehydrogenase activity|L-threonine catabolic process to glycine|identical protein binding|coenzyme binding	oas00260	Glycine, serine and threonine metabolism
LOC101118415	21.0824	10.3426	31.8221	3.07658	1.62133	0.00538577	0.050963	Up	0.293339	0.141045	0.700084	0.141815	0.0960774	0.128559	GeneID:101118415	metalloreductase STEAP1	GO:0005768,GO:0005886,GO:0006811,GO:0010008,GO:0016021,GO:0016491,GO:0046872,GO:0055072	endosome|plasma membrane|ion transport|endosome membrane|integral component of membrane|oxidoreductase activity|metal ion binding|iron ion homeostasis	oas04978	Mineral absorption
LOC101118727	5.97939	2.33623	9.62256	4.1182	2.04201	0.0284926	0.164477	Up	0.567605	0.682297	0.401802	0.171506	0.116192	0.113072	GeneID:101118727	60S ribosomal protein L10-like	GO:0000027,GO:0003735,GO:0006412,GO:0006417,GO:0015934,GO:0022625,GO:0045182,GO:0098556,GO:1990403	ribosomal large subunit assembly|structural constituent of ribosome|translation|regulation of translation|large ribosomal subunit|cytosolic large ribosomal subunit|translation regulator activity|cytoplasmic side of rough endoplasmic reticulum membrane|embryonic brain development	oas03010	Ribosome
LOC101118895	8.46786	2.33623	14.5995	6.24835	2.64347	0.00216531	0.0266367	Up	0.179657	0.163606	0.379882	0.0493498	0.0334337	0.0325358	GeneID:101118895	stromelysin-1	GO:0004222,GO:0008270,GO:0030574,GO:0031012	metalloendopeptidase activity|zinc ion binding|collagen catabolic process|extracellular matrix	oas04657,oas04668,oas05202,oas05215,oas05323	IL-17 signaling pathway|TNF signaling pathway|Transcriptional misregulation in cancer|Prostate cancer|Rheumatoid arthritis
LOC101119591	2.50419	4.68106	0.327321	0.0761671	-3.71469	0.0410982	0.206963	Down	0.0260241	0	0	0.183479	0.186456	0	GeneID:101119591	lymphocyte antigen 6G6e-like	GO:0002029,GO:0004675,GO:0005886,GO:0009986,GO:0030549,GO:0033130,GO:0042995,GO:0095500	desensitization of G protein-coupled receptor signaling pathway|transmembrane receptor protein serine/threonine kinase activity|plasma membrane|cell surface|acetylcholine receptor activator activity|acetylcholine receptor binding|cell projection|acetylcholine receptor signaling pathway
LOC101119706	500.443	703.909	296.976	0.421894	-1.24505	0.0106776	0.0838841	Down	1.12348	1.16576	1.73816	4.03933	4.05448	1.45341	GeneID:101119706	cytochrome P450 1B1			oas00140,oas00380,oas00980,oas04913,oas05204,oas05206	Steroid hormone biosynthesis|Tryptophan metabolism|Metabolism of xenobiotics by cytochrome P450|Ovarian steroidogenesis|Chemical carcinogenesis|MicroRNAs in cancer
LOC101121038	3.33574	6.67148	0	0.0274289	-5.18816	0.00109857	0.0163885	Down	0	0	0	0.15242	0.110638	0.172267	GeneID:101121038	calcitonin receptor-stimulating peptide 2-like	GO:0005179,GO:0005576	hormone activity|extracellular region	oas04080,oas04270	Neuroactive ligand-receptor interaction|Vascular smooth muscle contraction
LOC101121769	4.16567	7.33371	0.997634	0.135767	-2.88079	0.0236668	0.146649	Down	0.00647397	0.0129702	0	0.0586847	0.019879	0.0644837	GeneID:101121769	phosphatidylcholine translocator ABCB4
LOC105601985	13.0063	18.7076	7.30499	0.390357	-1.35713	0.0313579	0.174503	Down	0.0599948	0.0721175	0.133476	0.205449	0.319314	0.15537	GeneID:105601985	sialic acid-binding Ig-like lectin 14	GO:0005886,GO:0007155,GO:0016021,GO:0030246,GO:0043312,GO:0045087,GO:0070821,GO:0101003	plasma membrane|cell adhesion|integral component of membrane|carbohydrate binding|neutrophil degranulation|innate immune response|tertiary granule membrane|ficolin-1-rich granule membrane
LOC105614373	25.3155	42.7154	7.91558	0.185837	-2.42789	1.99831e-06	0.00010869	Down	0.130367	0.0435303	0.0351563	0.332637	0.373617	0.415524	GeneID:105614373	cytochrome P450 2B4-like	GO:0005506,GO:0005737,GO:0005789,GO:0006082,GO:0006805,GO:0008392,GO:0008395,GO:0016712,GO:0019373,GO:0020037,GO:0031090,GO:0042738,GO:0043231,GO:0055114,GO:0070330	iron ion binding|cytoplasm|endoplasmic reticulum membrane|organic acid metabolic process|xenobiotic metabolic process|arachidonic acid epoxygenase activity|steroid hydroxylase activity|oxidoreductase activity, acting on paired donors, with incorporation or reduction of molecular oxygen, reduced flavin or flavoprotein as one donor, and incorporation of one atom of oxygen|epoxygenase P450 pathway|h…	oas00140,oas00590,oas00830,oas05204	Steroid hormone biosynthesis|Arachidonic acid metabolism|Retinol metabolism|Chemical carcinogenesis
LOC106991444	10.126	5.00251	15.2494	3.04744	1.6076	0.0210149	0.135538	Up	0.664242	0.626244	0.513676	0.236124	0.119978	0.233511	GeneID:106991444	60S ribosomal protein L10-like	GO:0000027,GO:0003735,GO:0006412,GO:0006417,GO:0015934,GO:0022625,GO:0045182,GO:0098556,GO:1990403	ribosomal large subunit assembly|structural constituent of ribosome|translation|regulation of translation|large ribosomal subunit|cytosolic large ribosomal subunit|translation regulator activity|cytoplasmic side of rough endoplasmic reticulum membrane|embryonic brain development	oas03010	Ribosome
LOC106991560	23.6769	38.3889	8.96495	0.233394	-2.09916	2.49953e-05	0.000878299	Down	0.0888902	0.103884	0.209749	0.701313	0.561055	0.45745	GeneID:106991560	carcinoembryonic antigen-related cell adhesion molecule 6-like	GO:0005615,GO:0005886,GO:0006915,GO:0007156,GO:0007157,GO:0007165,GO:0008284,GO:0009986,GO:0016324,GO:0030335,GO:0031225,GO:0034116,GO:0035577,GO:0042802,GO:0043312,GO:0046982,GO:0050900,GO:1904906,GO:2000811	extracellular space|plasma membrane|apoptotic process|homophilic cell adhesion via plasma membrane adhesion molecules|heterophilic cell-cell adhesion via plasma membrane cell adhesion molecules|signal transduction|positive regulation of cell proliferation|cell surface|apical plasma membrane|positive regulation of cell migration|anchored component of membrane|positive regulation of heterotypic cel…
LOC114108662	307.632	567.564	47.6993	0.0840432	-3.57273	0.0134197	0.0987591	Down	3.82248	3.12706	2.25492	2.56665	3.84723	101.974	GeneID:114108662	60S ribosomal protein L34	GO:0000184,GO:0003723,GO:0003735,GO:0005783,GO:0005829,GO:0006412,GO:0006413,GO:0006614,GO:0022625,GO:0045296,GO:0070062	nuclear-transcribed mRNA catabolic process, nonsense-mediated decay|RNA binding|structural constituent of ribosome|endoplasmic reticulum|cytosol|translation|translational initiation|SRP-dependent cotranslational protein targeting to membrane|cytosolic large ribosomal subunit|cadherin binding|extracellular exosome	oas03010	Ribosome
LOC114108665	401.157	187.125	615.189	3.28707	1.7168	1.92829e-19	1.71088e-16	Up	13.4999	14.2375	19.7311	3.77123	4.09312	6.52028	GeneID:114108665	growth-regulated alpha protein-like	GO:0005615,GO:0006954,GO:0006955,GO:0008009,GO:0008083	extracellular space|inflammatory response|immune response|chemokine activity|growth factor activity	oas04060,oas04062,oas04621,oas04657,oas04668,oas05132,oas05134,oas05167	Cytokine-cytokine receptor interaction|Chemokine signaling pathway|NOD-like receptor signaling pathway|IL-17 signaling pathway|TNF signaling pathway|Salmonella infection|Legionellosis|Kaposi sarcoma-associated herpesvirus infection
LOC114109728	22.8412	42.0377	3.64473	0.0867125	-3.52762	0.0218687	0.139028	Down	0.0953694	0.0716501	0.0964445	2.85764	0.0732102	0.0949923	GeneID:114109728	hippocampus abundant transcript 1 protein-like	GO:0005215,GO:0016021,GO:0055085	transporter activity|integral component of membrane|transmembrane transport
LOC114110469	5.64029	1.67148	9.6091	5.75512	2.52485	0.0155559	0.110544	Up	0.399791	0.222488	0.67383	0.0447407	0.1364	0.0442456	GeneID:114110469	rho-related GTP-binding protein RhoE-like	GO:0003924,GO:0005525,GO:0005622,GO:0005886,GO:0007264	GTPase activity|GTP binding|intracellular|plasma membrane|small GTPase mediated signal transduction
LOC114112115	40.3452	58.4714	22.2191	0.380068	-1.39567	0.000482784	0.00881627	Down	0.949668	0.860701	1.23477	2.77839	3.79549	1.44139	GeneID:114112115	interleukin-4 receptor subunit alpha-like	GO:0002532,GO:0004896,GO:0016021	production of molecular mediator involved in inflammatory response|cytokine receptor activity|integral component of membrane	oas04060,oas04151,oas04630,oas04640,oas04658,oas04659,oas05200,oas05321	Cytokine-cytokine receptor interaction|PI3K-Akt signaling pathway|Jak-STAT signaling pathway|Hematopoietic cell lineage|Th1 and Th2 cell differentiation|Th17 cell differentiation|Pathways in cancer|Inflammatory bowel disease (IBD)
LOC114112171	1.9796	0	3.9592	21.5102	4.42695	0.0261574	0.155174	Up	0.527954	0.264431	0	0	0	0	GeneID:114112171	CMP-sialic acid transporter-like	GO:0000139,GO:0008643,GO:0015165,GO:0016021	Golgi membrane|carbohydrate transport|pyrimidine nucleotide-sugar transmembrane transporter activity|integral component of membrane
LOC114112251	16.0196	25.3993	6.64	0.26136	-1.93589	0.0039598	0.0411217	Down	0.048755	0.0586067	0.0887483	0.35356	0.339336	0.0582747	GeneID:114112251	basic proline-rich protein-like	GO:0005737,GO:0005829,GO:0005886,GO:0005925,GO:0008270,GO:0008285,GO:0030054,GO:0032991	cytoplasm|cytosol|plasma membrane|focal adhesion|zinc ion binding|negative regulation of cell proliferation|cell junction|protein-containing complex	oas04151,oas04510,oas04512,oas04611,oas04926,oas04933,oas04974,oas05146,oas05165	PI3K-Akt signaling pathway|Focal adhesion|ECM-receptor interaction|Platelet activation|Relaxin signaling pathway|AGE-RAGE signaling pathway in diabetic complications|Protein digestion and absorption|Amoebiasis|Human papillomavirus infection
LOC114112699	4.6784	8.70215	0.654643	0.0758688	-3.72035	0.0159306	0.112457	Down	0.0187275	0	0	0.0660175	0.182098	0	GeneID:114112699	collagen alpha-1(I) chain-like			oas04611,oas04926,oas04933,oas04974,oas05146	Platelet activation|Relaxin signaling pathway|AGE-RAGE signaling pathway in diabetic complications|Protein digestion and absorption|Amoebiasis
LOC114112946	35.1074	4.33988	65.875	15.1788	3.92398	0.00153783	0.0209712	Up	0.0925247	0.383976	2.16543	0.0798772	0.0541155	0.0394967	GeneID:114112946	BDNF/NT-3 growth factors receptor-like	GO:0001570,GO:0001764,GO:0004714,GO:0004888,GO:0005030,GO:0005524,GO:0005622,GO:0005737,GO:0005768,GO:0005769,GO:0005791,GO:0005829,GO:0005886,GO:0005887,GO:0007528,GO:0007612,GO:0007616,GO:0007623,GO:0007631,GO:0008284,GO:0009968,GO:0009986,GO:0010628,GO:0010976,GO:0014047,GO:0014068,GO:0014069,GO:0019222,GO:0019227,GO:0021954,GO:0021987,GO:0022011,GO:0030154,GO:0030182,GO:0030424,GO:0030425,GO:…	vasculogenesis|neuron migration|transmembrane receptor protein tyrosine kinase activity|transmembrane signaling receptor activity|neurotrophin receptor activity|ATP binding|intracellular|cytoplasm|endosome|early endosome|rough endoplasmic reticulum|cytosol|plasma membrane|integral component of plasma membrane|neuromuscular junction development|learning|long-term memory|circadian rhythm|feeding be…	oas04010,oas04014,oas04151,oas04722,oas05034	MAPK signaling pathway|Ras signaling pathway|PI3K-Akt signaling pathway|Neurotrophin signaling pathway|Alcoholism
LOC114114799	18.9402	9.35895	28.5214	3.04933	1.60849	0.00349168	0.0376604	Up	0.167336	0.155207	0.213094	0.068664	0.0888084	0.0185193	GeneID:114114799	mucin-16-like
LOC114114868	28.0183	15.0248	41.0118	2.73143	1.44966	0.00124324	0.0178815	Up	1.59996	0.856624	0.97638	0.555679	0.423521	0.274765	GeneID:114114868	NACHT, LRR and PYD domains-containing protein 3-like	GO:0002374,GO:0002674,GO:0002830,GO:0005524,GO:0005576,GO:0005634,GO:0005737,GO:0005783,GO:0006919,GO:0006954,GO:0008134,GO:0032088,GO:0032611,GO:0032621,GO:0032736,GO:0032753,GO:0032754,GO:0042802,GO:0043280,GO:0043565,GO:0044546,GO:0045087,GO:0045630,GO:0045944,GO:0050701,GO:0050713,GO:0050718,GO:0050830,GO:0051092,GO:0051607,GO:0071222,GO:0071224,GO:0072559,GO:1901223,GO:2000321,GO:2000553	cytokine secretion involved in immune response|negative regulation of acute inflammatory response|positive regulation of type 2 immune response|ATP binding|extracellular region|nucleus|cytoplasm|endoplasmic reticulum|activation of cysteine-type endopeptidase activity involved in apoptotic process|inflammatory response|transcription factor binding|negative regulation of NF-kappaB transcription fac…	oas04217,oas04621,oas04625,oas05133,oas05164	Necroptosis|NOD-like receptor signaling pathway|C-type lectin receptor signaling pathway|Pertussis|Influenza A
LOC114115227	1.50122	3.00243	0	0.0609487	-4.03626	0.0415894	0.208446	Down	0	0	0	0.0240086	0.0121991	0.0178072	GeneID:114115227	uncharacterized LOC114115227	GO:0003677,GO:0003964,GO:0004523,GO:0006310,GO:0008270,GO:0015074	DNA binding|RNA-directed DNA polymerase activity|RNA-DNA hybrid ribonuclease activity|DNA recombination|zinc ion binding|DNA integration
LOC114115420	3.83151	6.66539	0.997634	0.149381	-2.74293	0.0354568	0.18827	Down	0.026222	0.0525343	0	0.158464	0.0805173	0.287302	GeneID:114115420	cilia- and flagella-associated protein 299
LOC114116117	27.9718	16.6973	39.2463	2.34961	1.23242	0.00701977	0.0620889	Up	0.787295	1.6683	1.13301	0.670963	0.557876	0.301608	GeneID:114116117	UL16-binding protein 1-like	GO:0001913,GO:0005783,GO:0005829,GO:0005886,GO:0006955,GO:0015629,GO:0016032,GO:0030101,GO:0042267,GO:0042271,GO:0046658,GO:0046703,GO:0050776	T cell mediated cytotoxicity|endoplasmic reticulum|cytosol|plasma membrane|immune response|actin cytoskeleton|viral process|natural killer cell activation|natural killer cell mediated cytotoxicity|susceptibility to natural killer cell mediated cytotoxicity|anchored component of plasma membrane|natural killer cell lectin-like receptor binding|regulation of immune response	oas04650	Natural killer cell mediated cytotoxicity
LOC114116396	11.5024	19.7004	3.3044	0.168088	-2.57271	0.000580349	0.0101461	Down	0.0822468	0.0329553	0.0499044	0.480462	0.319893	0.180228	GeneID:114116396	cadherin-17-like			oas05226	Gastric cancer
LOC114116817	52.6131	87.0387	18.1875	0.209003	-2.25841	0.0410506	0.206876	Down	0.467259	0.260035	0.227513	0.383467	3.84375	0.361987	GeneID:114116817	sphingosine kinase 1-like	GO:0000287,GO:0001568,GO:0003677,GO:0003951,GO:0005516,GO:0005524,GO:0005634,GO:0005737,GO:0005829,GO:0005886,GO:0006457,GO:0006670,GO:0006954,GO:0007165,GO:0007420,GO:0008481,GO:0010800,GO:0010803,GO:0017050,GO:0019722,GO:0030148,GO:0030307,GO:0030335,GO:0031398,GO:0032651,GO:0035556,GO:0038036,GO:0043066,GO:0045766,GO:0045931,GO:0045987,GO:0046512,GO:0046521,GO:0048146,GO:0051092,GO:0051721,GO:…	magnesium ion binding|blood vessel development|DNA binding|NAD+ kinase activity|calmodulin binding|ATP binding|nucleus|cytoplasm|cytosol|plasma membrane|protein folding|sphingosine metabolic process|inflammatory response|signal transduction|brain development|sphinganine kinase activity|positive regulation of peptidyl-threonine phosphorylation|regulation of tumor necrosis factor-mediated signaling…	oas00600,oas04020,oas04071,oas04072,oas04370,oas04371,oas04666,oas05152	Sphingolipid metabolism|Calcium signaling pathway|Sphingolipid signaling pathway|Phospholipase D signaling pathway|VEGF signaling pathway|Apelin signaling pathway|Fc gamma R-mediated phagocytosis|Tuberculosis
LOC114116917	15.8118	6.34856	25.275	3.98127	1.99323	0.00144389	0.0200562	Up	1.15207	2.37221	1.35923	0.580175	0.524079	0.127501	GeneID:114116917	protein Wfdc21-like	GO:0005615,GO:0008047,GO:0030414,GO:0032496,GO:0034612,GO:0050872	extracellular space|enzyme activator activity|peptidase inhibitor activity|response to lipopolysaccharide|response to tumor necrosis factor|white fat cell differentiation
LOC114117315	5.17469	8.68942	1.65996	0.19097	-2.38858	0.0367008	0.192965	Down	0.0119057	0.0119262	0.0361198	0.167879	0.134045	0.0118587	GeneID:114117315	lymphocyte transmembrane adapter 1-like	GO:0000188,GO:0002250,GO:0005794,GO:0005829,GO:0005886,GO:0016021,GO:0019901,GO:0035556,GO:0042113,GO:0042169,GO:0050868	inactivation of MAPK activity|adaptive immune response|Golgi apparatus|cytosol|plasma membrane|integral component of membrane|protein kinase binding|intracellular signal transduction|B cell activation|SH2 domain binding|negative regulation of T cell activation
LOC114117476	32.4649	43.6795	21.2503	0.486272	-1.04016	0.0289156	0.165652	Down	1.03981	1.34795	1.54637	1.10889	2.31638	4.63019	GeneID:114117476	vacuolar protein sorting-associated protein 16 homolog	GO:0003779,GO:0005765,GO:0005768,GO:0005769,GO:0005776,GO:0006886,GO:0007033,GO:0016197,GO:0030136,GO:0030897,GO:0031902,GO:0032889,GO:0035542	actin binding|lysosomal membrane|endosome|early endosome|autophagosome|intracellular protein transport|vacuole organization|endosomal transport|clathrin-coated vesicle|HOPS complex|late endosome membrane|regulation of vacuole fusion, non-autophagic|regulation of SNARE complex assembly
LOC114117808	68.0216	31.3832	104.66	3.33543	1.73787	0.0415982	0.208446	Up	3.34281	0.533399	0.837645	0.253259	0.62071	0.530378	GeneID:114117808	UDP-N-acetylhexosamine pyrophosphorylase-like	GO:0003977,GO:0005654,GO:0005829,GO:0005886,GO:0006048,GO:0030246,GO:0042802	UDP-N-acetylglucosamine diphosphorylase activity|nucleoplasm|cytosol|plasma membrane|UDP-N-acetylglucosamine biosynthetic process|carbohydrate binding|identical protein binding	oas00520	Amino sugar and nucleotide sugar metabolism
LOC114117993	45.1811	71.1228	19.2395	0.2705	-1.8863	1.02012e-06	5.98417e-05	Down	0.346746	0.347343	0.428578	1.94022	1.39991	0.805875	GeneID:114117993	carcinoembryonic antigen-related cell adhesion molecule 6-like	GO:0005615,GO:0005886,GO:0006915,GO:0007156,GO:0007157,GO:0007165,GO:0008284,GO:0009986,GO:0016324,GO:0030335,GO:0031225,GO:0034116,GO:0035577,GO:0042802,GO:0043312,GO:0046982,GO:0050900,GO:1904906,GO:2000811	extracellular space|plasma membrane|apoptotic process|homophilic cell adhesion via plasma membrane adhesion molecules|heterophilic cell-cell adhesion via plasma membrane cell adhesion molecules|signal transduction|positive regulation of cell proliferation|cell surface|apical plasma membrane|positive regulation of cell migration|anchored component of membrane|positive regulation of heterotypic cel…
LOC114118433	11.8271	17.014	6.64015	0.390048	-1.35827	0.0393078	0.201376	Down	0.127123	0.169788	0.128556	0.554825	0.216857	0.31655	GeneID:114118433	P2Y purinoceptor 2-like	GO:0005524,GO:0007200,GO:0007204,GO:0010976,GO:0014911,GO:0016323,GO:0016324,GO:0019233,GO:0030279,GO:0031686,GO:0032308,GO:0032722,GO:0045028,GO:0045030,GO:0060406,GO:0070257,GO:0097746,GO:0098978,GO:0099059,GO:0099509,GO:2000300	ATP binding|phospholipase C-activating G protein-coupled receptor signaling pathway|positive regulation of cytosolic calcium ion concentration|positive regulation of neuron projection development|positive regulation of smooth muscle cell migration|basolateral plasma membrane|apical plasma membrane|sensory perception of pain|negative regulation of ossification|A1 adenosine receptor binding|positiv…	oas04080,oas04750	Neuroactive ligand-receptor interaction|Inflammatory mediator regulation of TRP channels
LOC114118855	53.828	85.7563	21.8997	0.255361	-1.96939	0.0438271	0.214967	Down	0.778155	0.857443	0.944312	8.03344	1.07523	0.968847	GeneID:114118855	serine/threonine-protein phosphatase PP1-gamma catalytic subunit-like			oas03015,oas04022,oas04024,oas04114,oas04218,oas04261,oas04270,oas04390,oas04510,oas04611,oas04720,oas04728,oas04750,oas04810,oas04910,oas04921,oas04931,oas05031,oas05034,oas05168,oas05205	mRNA surveillance pathway|cGMP-PKG signaling pathway|cAMP signaling pathway|Oocyte meiosis|Cellular senescence|Adrenergic signaling in cardiomyocytes|Vascular smooth muscle contraction|Hippo signaling pathway|Focal adhesion|Platelet activation|Long-term potentiation|Dopaminergic synapse|Inflammatory mediator regulation of TRP channels|Regulation of actin cytoskeleton|Insulin signaling pathway|Oxy…
LRRC15	274.908	377.562	172.255	0.456366	-1.13174	9.60311e-11	1.88634e-08	Down	0.906702	0.618189	0.955329	2.02726	1.87551	1.5178	GeneID:101103371	leucine rich repeat containing 15	GO:0005622,GO:0007154,GO:0016021	intracellular|cell communication|integral component of membrane
LRRN3	72.6373	33.3823	111.892	3.35132	1.74473	2.83312e-10	4.73164e-08	Up	0.619399	0.825153	0.716787	0.192944	0.241825	0.20989	GeneID:101113322	leucine rich repeat neuronal 3	GO:0016021,GO:0051965	integral component of membrane|positive regulation of synapse assembly
LY6G6C	26.3485	39.0683	13.6288	0.348627	-1.52025	0.00707551	0.0623875	Down	0.261682	0.480575	0.154368	1.53745	0.736558	0.304088	GeneID:101118646	lymphocyte antigen 6 family member G6C	GO:0009617,GO:0009897,GO:0031225,GO:0032991,GO:0042802,GO:0051260	response to bacterium|external side of plasma membrane|anchored component of membrane|protein-containing complex|identical protein binding|protein homooligomerization
LYVE1	30.1687	42.1084	18.229	0.433087	-1.20727	0.00798533	0.0681248	Down	0.229497	0.195408	0.208876	0.496967	0.739929	0.22859	GeneID:101103009	lymphatic vessel endothelial hyaluronan receptor 1	GO:0004888,GO:0005540,GO:0005886,GO:0006027,GO:0007155,GO:0016021	transmembrane signaling receptor activity|hyaluronic acid binding|plasma membrane|glycosaminoglycan catabolic process|cell adhesion|integral component of membrane
LYZ	3.49859	6.00738	0.989799	0.165272	-2.59709	0.0474795	0.228249	Down	0.122603	0.0614067	0	0.493937	0.313719	0.305295	GeneID:100049062	lysozyme	GO:0003796,GO:0008152,GO:0019835,GO:0050829,GO:0050830	lysozyme activity|metabolic process|cytolysis|defense response to Gram-negative bacterium|defense response to Gram-positive bacterium	oas04970	Salivary secretion
MCHR1	1.83095	3.6619	0	0.0499584	-4.32313	0.0286918	0.164969	Down	0	0	0	0.01208	0.012276	0.107517	GeneID:101108822	melanin concentrating hormone receptor 1	GO:0004930,GO:0005887,GO:0007218,GO:0030273,GO:0042923	G protein-coupled receptor activity|integral component of plasma membrane|neuropeptide signaling pathway|melanin-concentrating hormone receptor activity|neuropeptide binding	oas04080	Neuroactive ligand-receptor interaction
MEGF10	76.8782	119.912	33.8446	0.282224	-1.82509	6.68995e-07	4.18372e-05	Down	0.177565	0.195084	0.214322	1.03844	0.76215	0.279558	GeneID:101106165	multiple EGF like domains 10	GO:0001849,GO:0001891,GO:0005044,GO:0005112,GO:0005886,GO:0014719,GO:0014816,GO:0014841,GO:0016021,GO:0033002,GO:0034109,GO:0042995,GO:0043652,GO:0043654,GO:0048641,GO:0051147,GO:0051451,GO:0055001,GO:1902742	complement component C1q binding|phagocytic cup|scavenger receptor activity|Notch binding|plasma membrane|skeletal muscle satellite cell activation|skeletal muscle satellite cell differentiation|skeletal muscle satellite cell proliferation|integral component of membrane|muscle cell proliferation|homotypic cell-cell adhesion|cell projection|engulfment of apoptotic cell|recognition of apoptotic cel…
MISP	9.52037	17.0533	1.98743	0.116648	-3.09976	0.00113462	0.0167957	Down	0.0114781	0.0114978	0	0.0693635	0.113566	0.0152436	GeneID:101114865	mitotic spindle positioning	GO:0003779,GO:0005856,GO:0005886,GO:0005925,GO:0005938,GO:0007049,GO:0043231,GO:0051301	actin binding|cytoskeleton|plasma membrane|focal adhesion|cell cortex|cell cycle|intracellular membrane-bounded organelle|cell division
MKI67	211.328	60.9605	361.695	5.93272	2.56869	0.00118642	0.0173276	Up	0.600988	1.42637	0.693505	0.080373	0.0663626	0.310483	GeneID:101106643	marker of proliferation Ki-67
MMP13	18.0009	31.6894	4.31239	0.136044	-2.87785	2.64305e-06	0.000135454	Down	0.0779254	0.0780594	0.0985048	0.451293	0.558314	0.85379	GeneID:443113	matrix metallopeptidase 13	GO:0004222,GO:0005509,GO:0005518,GO:0008270,GO:0022617,GO:0030574,GO:0031012,GO:0060349	metalloendopeptidase activity|calcium ion binding|collagen binding|zinc ion binding|extracellular matrix disassembly|collagen catabolic process|extracellular matrix|bone morphogenesis	oas04657,oas04926,oas04928	IL-17 signaling pathway|Relaxin signaling pathway|Parathyroid hormone synthesis, secretion and action
MMP15	178.915	75.7277	282.102	3.72403	1.89686	2.43283e-22	4.31707e-19	Up	1.92013	2.24528	2.36726	0.562459	0.485456	0.701009	GeneID:101122213	matrix metallopeptidase 15			oas04928	Parathyroid hormone synthesis, secretion and action
MMP17	128.985	175.04	82.9297	0.473791	-1.07768	0.00014477	0.00354948	Down	0.857279	0.811698	1.2826	2.51936	2.60832	1.09953	GeneID:101117966	matrix metallopeptidase 17	GO:0001822,GO:0004222,GO:0005886,GO:0006508,GO:0008047,GO:0008270,GO:0031012,GO:0031225,GO:0042756,GO:0070006	kidney development|metalloendopeptidase activity|plasma membrane|proteolysis|enzyme activator activity|zinc ion binding|extracellular matrix|anchored component of membrane|drinking behavior|metalloaminopeptidase activity	oas04928	Parathyroid hormone synthesis, secretion and action
MMP9	15.8618	29.7467	1.97694	0.0667482	-3.90513	6.34842e-06	0.000285197	Down	0.0467949	0.0117188	0.0118306	0.49488	0.490935	0.0699148	GeneID:100192422	matrix metallopeptidase 9	GO:0001503,GO:0004222,GO:0005615,GO:0006508,GO:0008270,GO:0030574,GO:0031012,GO:0050900	ossification|metalloendopeptidase activity|extracellular space|proteolysis|zinc ion binding|collagen catabolic process|extracellular matrix|leukocyte migration	oas01522,oas04657,oas04668,oas04670,oas04915,oas04926,oas05161,oas05200,oas05202,oas05205,oas05206,oas05215,oas05219,oas05418	Endocrine resistance|IL-17 signaling pathway|TNF signaling pathway|Leukocyte transendothelial migration|Estrogen signaling pathway|Relaxin signaling pathway|Hepatitis B|Pathways in cancer|Transcriptional misregulation in cancer|Proteoglycans in cancer|MicroRNAs in cancer|Prostate cancer|Bladder cancer|Fluid shear stress and atherosclerosis
MUSTN1	47.6874	29.7434	65.6314	2.20769	1.14254	0.00166485	0.0221917	Up	2.27408	1.91483	2.36637	0.896256	1.55173	0.525238	GeneID:101108693	musculoskeletal, embryonic nuclear protein 1	GO:0002062,GO:0005634,GO:0010628,GO:0032332,GO:0035988,GO:0042246,GO:1902730,GO:1902732	chondrocyte differentiation|nucleus|positive regulation of gene expression|positive regulation of chondrocyte differentiation|chondrocyte proliferation|tissue regeneration|positive regulation of proteoglycan biosynthetic process|positive regulation of chondrocyte proliferation
MYB	3.15901	0.667666	5.65035	8.46021	3.08069	0.0351458	0.187075	Up	0.0314724	0.0551715	0.0477408	0	0.00805326	0.007837	GeneID:101109886	MYB proto-oncogene, transcription factor	GO:0000278,GO:0003677,GO:0005634,GO:0045893	mitotic cell cycle|DNA binding|nucleus|positive regulation of transcription, DNA-templated	oas04151	PI3K-Akt signaling pathway
MYBL1	26.0878	15.6865	36.4892	2.32597	1.21783	0.00433134	0.0439512	Up	0.19233	0.198165	0.216726	0.0664158	0.0956156	0.0985214	GeneID:101121782	MYB proto-oncogene like 1
MYO1G	6.50419	11.3509	1.65745	0.14606	-2.77537	0.00750522	0.0650453	Down	0.0170492	0.0170785	0.00862069	0.18889	0.0698016	0.0339635	GeneID:101114605	myosin IG	GO:0001891,GO:0002456,GO:0003774,GO:0003779,GO:0005516,GO:0005524,GO:0005546,GO:0005547,GO:0005886,GO:0005902,GO:0006887,GO:0016020,GO:0016459,GO:0030027,GO:0030175,GO:0031256,GO:0031589,GO:0038096,GO:0043325,GO:0070062,GO:0071976,GO:0072678,GO:0120117	phagocytic cup|T cell mediated immunity|motor activity|actin binding|calmodulin binding|ATP binding|phosphatidylinositol-4,5-bisphosphate binding|phosphatidylinositol-3,4,5-trisphosphate binding|plasma membrane|microvillus|exocytosis|membrane|myosin complex|lamellipodium|filopodium|leading edge membrane|cell-substrate adhesion|Fc-gamma receptor signaling pathway involved in phagocytosis|phosphati…
MYOZ3	15.4883	21.3671	9.60955	0.449908	-1.1523	0.0403403	0.204873	Down	0.39644	0.364028	0.200454	0.532387	0.879165	0.723932	GeneID:100528014	myozenin 3	GO:0003779,GO:0015629,GO:0030018,GO:0031433,GO:0051373	actin binding|actin cytoskeleton|Z disc|telethonin binding|FATZ binding
NDC80	30.1266	15.3621	44.891	2.92138	1.54665	0.000394247	0.00762708	Up	0.32701	0.655144	0.602339	0.176443	0.227121	0.139593	GeneID:101104623	NDC80 kinetochore complex component	GO:0000070,GO:0000132,GO:0000278,GO:0000775,GO:0000776,GO:0000777,GO:0000778,GO:0000942,GO:0005634,GO:0005654,GO:0005813,GO:0005829,GO:0007052,GO:0007059,GO:0008608,GO:0016020,GO:0031262,GO:0042802,GO:0051301,GO:0051310,GO:0051315,GO:0051383,GO:0090267,GO:1905342	mitotic sister chromatid segregation|establishment of mitotic spindle orientation|mitotic cell cycle|chromosome, centromeric region|kinetochore|condensed chromosome kinetochore|condensed nuclear chromosome kinetochore|condensed nuclear chromosome outer kinetochore|nucleus|nucleoplasm|centrosome|cytosol|mitotic spindle organization|chromosome segregation|attachment of spindle microtubules to kinet…
NDUFA4L2	218.5	338.286	98.7142	0.291893	-1.77649	9.39911e-14	3.70638e-11	Down	3.02569	2.10251	3.03223	12.1898	10.1835	5.53874	GeneID:101123455	NDUFA4 mitochondrial complex associated like 2	GO:0005751,GO:0022900,GO:1902600	mitochondrial respiratory chain complex IV|electron transport chain|proton transmembrane transport	oas00190,oas04714,oas04723,oas04932,oas05010,oas05012,oas05016	Oxidative phosphorylation|Thermogenesis|Retrograde endocannabinoid signaling|Non-alcoholic fatty liver disease (NAFLD)|Alzheimer disease|Parkinson disease|Huntington disease
NECAB3	12.317	17.3601	7.27395	0.419561	-1.25305	0.0453372	0.220187	Down	0.160297	0.0875849	0.0736835	0.220158	0.298307	0.246752	GeneID:101117268	N-terminal EF-hand calcium binding protein 3	GO:0000137,GO:0005509,GO:0005737,GO:0005783,GO:0042984	Golgi cis cisterna|calcium ion binding|cytoplasm|endoplasmic reticulum|regulation of amyloid precursor protein biosynthetic process
NEFH	25.5841	15.6737	35.4945	2.26379	1.17874	0.0131149	0.0969686	Up	0.30194	0.327664	0.271417	0.0591328	0.120184	0.217206	GeneID:101107472	neurofilament heavy			oas05014	Amyotrophic lateral sclerosis (ALS)
NEK2	11.4742	2.66921	20.2793	7.59253	2.92458	0.00017419	0.00410765	Up	0.211891	0.397979	0.200887	0.0133384	0.0406645	0.0527633	GeneID:101118973	NIMA related kinase 2	GO:0000070,GO:0000086,GO:0000278,GO:0000776,GO:0000777,GO:0000794,GO:0000922,GO:0001824,GO:0004672,GO:0004674,GO:0005524,GO:0005654,GO:0005730,GO:0005813,GO:0005829,GO:0005874,GO:0006468,GO:0007059,GO:0007088,GO:0010389,GO:0019903,GO:0030496,GO:0032212,GO:0032991,GO:0043392,GO:0046602,GO:0046777,GO:0046872,GO:0051225,GO:0051299,GO:0051301,GO:0051321,GO:0051973,GO:0051988,GO:0090307,GO:0097711,GO:…	mitotic sister chromatid segregation|G2/M transition of mitotic cell cycle|mitotic cell cycle|kinetochore|condensed chromosome kinetochore|condensed nuclear chromosome|spindle pole|blastocyst development|protein kinase activity|protein serine/threonine kinase activity|ATP binding|nucleoplasm|nucleolus|centrosome|cytosol|microtubule|protein phosphorylation|chromosome segregation|regulation of mito…
NKD1	10.6344	5.34118	15.9277	2.9819	1.57623	0.0227403	0.142794	Up	0.245398	0.30366	0.145979	0.101773	0.0738742	0.0575123	GeneID:101116855	NKD inhibitor of WNT signaling pathway 1	GO:0000159,GO:0001754,GO:0005509,GO:0005737,GO:0005886,GO:0007525,GO:0016055,GO:0030165,GO:0030178,GO:0045732,GO:0090090,GO:0090249,GO:1901231,GO:1901233,GO:2000096	protein phosphatase type 2A complex|eye photoreceptor cell differentiation|calcium ion binding|cytoplasm|plasma membrane|somatic muscle development|Wnt signaling pathway|PDZ domain binding|negative regulation of Wnt signaling pathway|positive regulation of protein catabolic process|negative regulation of canonical Wnt signaling pathway|regulation of cell motility involved in somitogenic axis elon…	oas04310	Wnt signaling pathway
NPDC1	17.4844	24.3722	10.5965	0.43507	-1.20068	0.023743	0.146868	Down	0.257624	0.178662	0.200406	0.638711	0.486806	0.335561	GeneID:105605776	neural proliferation, differentiation and control 1	GO:0005886,GO:0016021,GO:0050776	plasma membrane|integral component of membrane|regulation of immune response
NRSN2	104.527	140.199	68.8558	0.49143	-1.02494	1.38044e-05	0.000544353	Down	1.11124	0.770642	0.66685	1.77109	1.81232	1.59337	GeneID:101122878	neurensin 2	GO:0005886,GO:0007399,GO:0016021,GO:0030133,GO:0031410,GO:0043005,GO:0043025	plasma membrane|nervous system development|integral component of membrane|transport vesicle|cytoplasmic vesicle|neuron projection|neuronal cell body
NT5DC1	23.5663	13.3559	33.7767	2.53026	1.33928	0.00340113	0.0369415	Up	0.332156	0.216273	0.302311	0.100363	0.135989	0.0992529	GeneID:101106437	5'-nucleotidase domain containing 1	GO:0008253,GO:0046872	5'-nucleotidase activity|metal ion binding
NTRK2	160.301	104.475	216.128	2.06894	1.0489	9.96517e-09	1.0882e-06	Up	0.858443	0.776818	0.725865	0.410511	0.380253	0.348486	GeneID:101116015	neurotrophic receptor tyrosine kinase 2			oas04010,oas04014,oas04151,oas04722,oas05034	MAPK signaling pathway|Ras signaling pathway|PI3K-Akt signaling pathway|Neurotrophin signaling pathway|Alcoholism
PARM1	51.3196	68.5228	34.1165	0.498088	-1.00553	0.0218963	0.13914	Down	0.195682	0.10641	0.277043	0.416703	0.606583	0.13922	GeneID:101104239	prostate androgen-regulated mucin-like protein 1	GO:0000139,GO:0005634,GO:0005769,GO:0005770,GO:0005794,GO:0005829,GO:0005886,GO:0010008,GO:0016021,GO:0043231,GO:0051973	Golgi membrane|nucleus|early endosome|late endosome|Golgi apparatus|cytosol|plasma membrane|endosome membrane|integral component of membrane|intracellular membrane-bounded organelle|positive regulation of telomerase activity
PBK	29.9666	19.3616	40.5717	2.09445	1.06657	0.0154012	0.109702	Up	0.425238	0.865679	0.388416	0.221056	0.308883	0.273262	GeneID:101114676	PDZ binding kinase	GO:0000278,GO:0004674,GO:0005524,GO:0005634,GO:0032435,GO:0032873,GO:0034644,GO:0050728	mitotic cell cycle|protein serine/threonine kinase activity|ATP binding|nucleus|negative regulation of proteasomal ubiquitin-dependent protein catabolic process|negative regulation of stress-activated MAPK cascade|cellular response to UV|negative regulation of inflammatory response
PCDH1	11.1785	19.0398	3.31726	0.174226	-2.52097	0.00100876	0.0154814	Down	0.00735028	0.00368146	0.026016	0.0703297	0.0940406	0.0475879	GeneID:101108128	protocadherin 1	GO:0005509,GO:0005634,GO:0005730,GO:0005886,GO:0005887,GO:0005911,GO:0007155,GO:0007156,GO:0007267,GO:0007399,GO:0030054,GO:0043231	calcium ion binding|nucleus|nucleolus|plasma membrane|integral component of plasma membrane|cell-cell junction|cell adhesion|homophilic cell adhesion via plasma membrane adhesion molecules|cell-cell signaling|nervous system development|cell junction|intracellular membrane-bounded organelle
PCLAF	11.9743	2.33411	21.6146	9.25006	3.20946	5.54334e-05	0.00161695	Up	0.235523	0.471855	0.253064	0.014826	0.0301331	0.0586478	GeneID:101108753	PCNA clamp associated factor	GO:0003682,GO:0005634,GO:0006260,GO:0006974,GO:0007098,GO:0009411,GO:0019985,GO:0048471,GO:0051726	chromatin binding|nucleus|DNA replication|cellular response to DNA damage stimulus|centrosome cycle|response to UV|translesion synthesis|perinuclear region of cytoplasm|regulation of cell cycle
PIMREG	11.1332	2.33517	19.9312	8.5299	3.09253	0.000134659	0.00333615	Up	0.351999	0.556744	0.206086	0.0373189	0.0379244	0.055359	GeneID:101104673	PICALM interacting mitotic regulator	GO:0005634,GO:0005730,GO:0007049,GO:0051301	nucleus|nucleolus|cell cycle|cell division
PLA2G4D	14.6081	6.66685	22.5494	3.38031	1.75716	0.00358487	0.0383904	Up	0.189864	0.19019	0.160003	0.0398393	0.0323886	0.0866767	GeneID:101116150	phospholipase A2 group IVD	GO:0004622,GO:0004623,GO:0005509,GO:0005544,GO:0005737,GO:0005829,GO:0006644,GO:0006654,GO:0008970,GO:0016020,GO:0036148,GO:0036149,GO:0036150,GO:0036151,GO:0036152,GO:0046475,GO:0047498,GO:0102567,GO:0102568	lysophospholipase activity|phospholipase A2 activity|calcium ion binding|calcium-dependent phospholipid binding|cytoplasm|cytosol|phospholipid metabolic process|phosphatidic acid biosynthetic process|phospholipase A1 activity|membrane|phosphatidylglycerol acyl-chain remodeling|phosphatidylinositol acyl-chain remodeling|phosphatidylserine acyl-chain remodeling|phosphatidylcholine acyl-chain remode…	oas00564,oas00565,oas00590,oas00591,oas00592,oas04010,oas04014,oas04072,oas04217,oas04270,oas04370,oas04611,oas04664,oas04724,oas04726,oas04730,oas04750,oas04912,oas04913,oas04921,oas05231	Glycerophospholipid metabolism|Ether lipid metabolism|Arachidonic acid metabolism|Linoleic acid metabolism|alpha-Linolenic acid metabolism|MAPK signaling pathway|Ras signaling pathway|Phospholipase D signaling pathway|Necroptosis|Vascular smooth muscle contraction|VEGF signaling pathway|Platelet activation|Fc epsilon RI signaling pathway|Glutamatergic synapse|Serotonergic synapse|Long-term depres…
PLCD4	48.4859	70.1259	26.8458	0.382954	-1.38476	3.56366e-05	0.00115502	Down	0.231049	0.181851	0.258688	0.639953	0.68412	0.427394	GeneID:101111344	phospholipase C delta 4	GO:0004435,GO:0005509,GO:0005634,GO:0005783,GO:0007340,GO:0016020,GO:0016042,GO:0035556,GO:0046488	phosphatidylinositol phospholipase C activity|calcium ion binding|nucleus|endoplasmic reticulum|acrosome reaction|membrane|lipid catabolic process|intracellular signal transduction|phosphatidylinositol metabolic process	oas00562,oas04020,oas04070,oas04919,oas04933	Inositol phosphate metabolism|Calcium signaling pathway|Phosphatidylinositol signaling system|Thyroid hormone signaling pathway|AGE-RAGE signaling pathway in diabetic complications
PLCE1	113.486	153.226	73.7463	0.481672	-1.05388	3.01875e-05	0.00100817	Down	0.316033	0.144183	0.240488	0.53261	0.502819	0.414516	GeneID:101105703	phospholipase C epsilon 1	GO:0000139,GO:0000187,GO:0001558,GO:0004435,GO:0004629,GO:0005085,GO:0005829,GO:0005886,GO:0006651,GO:0006940,GO:0007010,GO:0007173,GO:0007200,GO:0007204,GO:0007265,GO:0007507,GO:0008277,GO:0008283,GO:0016042,GO:0017016,GO:0019722,GO:0019899,GO:0032835,GO:0043647,GO:0045859,GO:0046578,GO:0046872,GO:0048016	Golgi membrane|activation of MAPK activity|regulation of cell growth|phosphatidylinositol phospholipase C activity|phospholipase C activity|guanyl-nucleotide exchange factor activity|cytosol|plasma membrane|diacylglycerol biosynthetic process|regulation of smooth muscle contraction|cytoskeleton organization|epidermal growth factor receptor signaling pathway|phospholipase C-activating G protein-co…	oas00562,oas04014,oas04015,oas04020,oas04024,oas04070,oas04919,oas04933,oas05205	Inositol phosphate metabolism|Ras signaling pathway|Rap1 signaling pathway|Calcium signaling pathway|cAMP signaling pathway|Phosphatidylinositol signaling system|Thyroid hormone signaling pathway|AGE-RAGE signaling pathway in diabetic complications|Proteoglycans in cancer
PLCXD1	29.148	40.722	17.5741	0.431587	-1.21228	0.00621136	0.0563784	Down	0.292685	0.238216	0.443977	1.08704	0.636592	0.528394	GeneID:101116550	phosphatidylinositol specific phospholipase C X domain containing 1	GO:0005737,GO:0006629,GO:0008081	cytoplasm|lipid metabolic process|phosphoric diester hydrolase activity
PLEKHN1	33.9775	46.4136	21.5414	0.464275	-1.10695	0.00511122	0.0491924	Down	0.28322	0.249662	0.206217	0.673205	0.568173	0.349804	GeneID:101107808	pleckstrin homology domain containing N1	GO:0001666,GO:0001786,GO:0005739,GO:0005856,GO:0005886,GO:0031966,GO:0043065,GO:0061158,GO:0070300,GO:1901612,GO:1901981	response to hypoxia|phosphatidylserine binding|mitochondrion|cytoskeleton|plasma membrane|mitochondrial membrane|positive regulation of apoptotic process|3'-UTR-mediated mRNA destabilization|phosphatidic acid binding|cardiolipin binding|phosphatidylinositol phosphate binding
PLPPR3	14.6373	20.3563	8.91824	0.438789	-1.1884	0.0428174	0.211937	Down	0.101872	0.0364456	0.058869	0.183223	0.126613	0.137709	GeneID:101110057	phospholipid phosphatase related 3	GO:0005887,GO:0006644,GO:0008195,GO:0016791,GO:0042577,GO:0046839	integral component of plasma membrane|phospholipid metabolic process|phosphatidate phosphatase activity|phosphatase activity|lipid phosphatase activity|phospholipid dephosphorylation
PNMA2	25.032	15.3315	34.7325	2.2654	1.17977	0.0181282	0.122839	Up	0.278949	0.13364	0.226901	0.103831	0.0372408	0.138923	GeneID:101109768	PNMA family member 2	GO:0005730	nucleolus
POLE2	7.31161	2.00008	12.6231	6.30432	2.65634	0.00369033	0.0391831	Up	0.17987	0.27846	0.165362	0.0329389	0.0167367	0.0488616	GeneID:101123044	DNA polymerase epsilon 2, accessory subunit	GO:0003677,GO:0003887,GO:0006261,GO:0008622,GO:0042276	DNA binding|DNA-directed DNA polymerase activity|DNA-dependent DNA replication|epsilon DNA polymerase complex|error-prone translesion synthesis	oas03030,oas03410,oas03420	DNA replication|Base excision repair|Nucleotide excision repair
PPFIA3	39.0817	23.0158	55.1475	2.39461	1.25979	0.000638332	0.0109442	Up	0.271233	0.419899	0.336629	0.149009	0.10726	0.17192	GeneID:101109825	PTPRF interacting protein alpha 3	GO:0001669,GO:0005829,GO:0007269,GO:0016081,GO:0048172,GO:0048786,GO:0098831,GO:0098875,GO:0098978	acrosomal vesicle|cytosol|neurotransmitter secretion|synaptic vesicle docking|regulation of short-term neuronal synaptic plasticity|presynaptic active zone|presynaptic active zone cytoplasmic component|epididymosome|glutamatergic synapse
PRDM6	9.67558	14.6881	4.66306	0.31689	-1.65795	0.0304291	0.171078	Down	0.00419808	0.0210265	0.0339632	0.0380544	0.0773437	0.0710852	GeneID:101103235	PR/SET domain 6	GO:0000977,GO:0005634,GO:0018024,GO:0022008,GO:0031490,GO:0042803,GO:0043565,GO:0045892,GO:0046872,GO:0051151	RNA polymerase II regulatory region sequence-specific DNA binding|nucleus|histone-lysine N-methyltransferase activity|neurogenesis|chromatin DNA binding|protein homodimerization activity|sequence-specific DNA binding|negative regulation of transcription, DNA-templated|metal ion binding|negative regulation of smooth muscle cell differentiation	oas00310	Lysine degradation
PROSER2	13.4469	6.33493	20.5588	3.24387	1.69772	0.00817336	0.0693539	Up	0.247898	0.193142	0.417822	0.110969	0.0422887	0.109741	GeneID:101116497	proline and serine rich 2
PRR11	13.5013	6.00064	21.0019	3.49546	1.80548	0.0109499	0.0854094	Up	0.125732	0.503793	0.165294	0.0506544	0.0514763	0.125235	GeneID:101103489	proline rich 11	GO:0005634,GO:0005737,GO:0007050,GO:0016020,GO:0051726	nucleus|cytoplasm|cell cycle arrest|membrane|regulation of cell cycle
PTGS1	19.8871	35.776	3.99822	0.111498	-3.16491	5.84411e-06	0.000263375	Down	0.0205632	0.0720951	0.0311926	0.362444	0.641938	0.112651	GeneID:443551	prostaglandin-endoperoxide synthase 1	GO:0001516,GO:0004601,GO:0004666,GO:0005737,GO:0005789,GO:0006954,GO:0006979,GO:0008144,GO:0008217,GO:0016021,GO:0019371,GO:0020037,GO:0031090,GO:0042803,GO:0043231,GO:0046872,GO:0051213	prostaglandin biosynthetic process|peroxidase activity|prostaglandin-endoperoxide synthase activity|cytoplasm|endoplasmic reticulum membrane|inflammatory response|response to oxidative stress|drug binding|regulation of blood pressure|integral component of membrane|cyclooxygenase pathway|heme binding|organelle membrane|protein homodimerization activity|intracellular membrane-bounded organelle|meta…	oas00590,oas04611,oas04726,oas04923	Arachidonic acid metabolism|Platelet activation|Serotonergic synapse|Regulation of lipolysis in adipocytes
PTPRR	16.6577	23.3603	9.95505	0.426021	-1.231	0.0201612	0.131651	Down	0.0840256	0.101004	0.0679782	0.177722	0.197807	0.217603	GeneID:101121162	protein tyrosine phosphatase, receptor type R	GO:0001701,GO:0004725,GO:0005001,GO:0005615,GO:0005829,GO:0005886,GO:0006470,GO:0010633,GO:0016021,GO:0019901,GO:0030054,GO:0038128,GO:0048471,GO:0070373	in utero embryonic development|protein tyrosine phosphatase activity|transmembrane receptor protein tyrosine phosphatase activity|extracellular space|cytosol|plasma membrane|protein dephosphorylation|negative regulation of epithelial cell migration|integral component of membrane|protein kinase binding|cell junction|ERBB2 signaling pathway|perinuclear region of cytoplasm|negative regulation of ERK…	oas04010	MAPK signaling pathway
PTPRZ1	204.098	123.532	284.663	2.30484	1.20467	8.12825e-11	1.69689e-08	Up	1.03476	0.789417	1.13305	0.448629	0.47695	0.354932	GeneID:101103717	protein tyrosine phosphatase, receptor type Z1	GO:0002244,GO:0004725,GO:0005001,GO:0005886,GO:0005887,GO:0006470,GO:0007409,GO:0007417,GO:0007611,GO:0019221,GO:0031226,GO:0035335,GO:0045202,GO:0048709,GO:0070445,GO:0072534	hematopoietic progenitor cell differentiation|protein tyrosine phosphatase activity|transmembrane receptor protein tyrosine phosphatase activity|plasma membrane|integral component of plasma membrane|protein dephosphorylation|axonogenesis|central nervous system development|learning or memory|cytokine-mediated signaling pathway|intrinsic component of plasma membrane|peptidyl-tyrosine dephosphorylat…
PYGM	5.85139	11.3676	0.335156	0.0313641	-4.99474	0.000784566	0.012876	Down	0	0.00963495	0	0.135626	0.177205	0.0191607	GeneID:442998	glycogen phosphorylase, muscle associated	GO:0005980,GO:0008184,GO:0030170,GO:0102250,GO:0102499	glycogen catabolic process|glycogen phosphorylase activity|pyridoxal phosphate binding|linear malto-oligosaccharide phosphorylase activity|SHG alpha-glucan phosphorylase activity	oas00500,oas04217,oas04910,oas04922,oas04931	Starch and sucrose metabolism|Necroptosis|Insulin signaling pathway|Glucagon signaling pathway|Insulin resistance
QPRT	46.4205	23.0388	69.8023	3.02927	1.59897	0.000162536	0.00390417	Up	1.08054	1.93134	1.45696	0.874917	0.412028	0.18993	GeneID:101102696	quinolinate phosphoribosyltransferase	GO:0004514,GO:0005737,GO:0009435,GO:0034213	nicotinate-nucleotide diphosphorylase (carboxylating) activity|cytoplasm|NAD biosynthetic process|quinolinate catabolic process	oas00760	Nicotinate and nicotinamide metabolism
RAMP1	18.8093	30.0436	7.5751	0.252921	-1.98324	0.000650974	0.0110926	Down	0.499136	0.066666	0.201905	1.07248	1.05582	0.894892	GeneID:101110380	receptor activity modifying protein 1	GO:0001525,GO:0001635,GO:0005622,GO:0006816,GO:0006886,GO:0007186,GO:0007189,GO:0008277,GO:0008565,GO:0009986,GO:0015026,GO:0015031,GO:0031623,GO:0032870,GO:0043235,GO:0060050,GO:0072659,GO:0097643,GO:0097647,GO:0150056,GO:1990406,GO:1990407,GO:1990408	angiogenesis|calcitonin gene-related peptide receptor activity|intracellular|calcium ion transport|intracellular protein transport|G protein-coupled receptor signaling pathway|adenylate cyclase-activating G protein-coupled receptor signaling pathway|regulation of G protein-coupled receptor signaling pathway|protein transporter activity|cell surface|coreceptor activity|protein transport|receptor i…	oas04270	Vascular smooth muscle contraction
RAMP3	4.34251	7.35238	1.33264	0.180848	-2.46715	0.0443696	0.216748	Down	0	0.0188236	0.0570093	0.189264	0.192335	0.0374339	GeneID:101113582	receptor activity modifying protein 3	GO:0001525,GO:0005622,GO:0005886,GO:0006816,GO:0006886,GO:0007186,GO:0007189,GO:0008277,GO:0008565,GO:0009986,GO:0015026,GO:0015031,GO:0016021,GO:0031623,GO:0032870,GO:0043235,GO:0071392,GO:0072659,GO:0086103,GO:1903078,GO:1990410	angiogenesis|intracellular|plasma membrane|calcium ion transport|intracellular protein transport|G protein-coupled receptor signaling pathway|adenylate cyclase-activating G protein-coupled receptor signaling pathway|regulation of G protein-coupled receptor signaling pathway|protein transporter activity|cell surface|coreceptor activity|protein transport|integral component of membrane|receptor inte…	oas04270	Vascular smooth muscle contraction
RCAN2	18.9783	27.6953	10.2614	0.370787	-1.43134	0.00557024	0.052239	Down	0.102227	0.0630172	0.0795227	0.158403	0.225363	0.274138	GeneID:101120281	regulator of calcineurin 2	GO:0003676,GO:0005737,GO:0008597,GO:0019722,GO:0070884	nucleic acid binding|cytoplasm|calcium-dependent protein serine/threonine phosphatase regulator activity|calcium-mediated signaling|regulation of calcineurin-NFAT signaling cascade	oas04919	Thyroid hormone signaling pathway
RELT	35.6508	47.734	23.5675	0.493572	-1.01867	0.00785119	0.0673854	Down	0.180239	0.216659	0.246066	0.580912	0.396633	0.323147	GeneID:101104340	RELT TNF receptor	GO:0005886,GO:0006915,GO:0016021,GO:0048471	plasma membrane|apoptotic process|integral component of membrane|perinuclear region of cytoplasm	oas04060	Cytokine-cytokine receptor interaction
RFX2	40.0993	58.403	21.7955	0.373766	-1.41979	0.000259763	0.00554293	Down	0.250648	0.0860842	0.1376	0.367856	0.432464	0.463648	GeneID:101107090	regulatory factor X2	GO:0000978,GO:0001675,GO:0003700,GO:0005634,GO:0005737,GO:0006357,GO:0007286,GO:0045944,GO:0060271,GO:1990830	RNA polymerase II proximal promoter sequence-specific DNA binding|acrosome assembly|DNA-binding transcription factor activity|nucleus|cytoplasm|regulation of transcription by RNA polymerase II|spermatid development|positive regulation of transcription by RNA polymerase II|cilium assembly|cellular response to leukemia inhibitory factor
RNASE6	21.6596	30.6995	12.6197	0.410873	-1.28323	0.0202935	0.132029	Down	0.137128	0.137364	0.60092	0.644532	0.678382	0.79675	GeneID:101114021	ribonuclease A family member k6	GO:0003676,GO:0004519,GO:0004540,GO:0005615,GO:0005764,GO:0019731,GO:0031410,GO:0045087,GO:0050829,GO:0050830,GO:0051607,GO:0061844	nucleic acid binding|endonuclease activity|ribonuclease activity|extracellular space|lysosome|antibacterial humoral response|cytoplasmic vesicle|innate immune response|defense response to Gram-negative bacterium|defense response to Gram-positive bacterium|defense response to virus|antimicrobial humoral immune response mediated by antimicrobial peptide
RNF144B	41.8685	25.0581	58.679	2.34253	1.22807	0.00329723	0.0362007	Up	0.321832	0.253303	0.447507	0.202591	0.182349	0.0515185	GeneID:101122473	ring finger protein 144B	GO:0000151,GO:0000209,GO:0005737,GO:0006511,GO:0006915,GO:0016021,GO:0031624,GO:0031966,GO:0032436,GO:0043066,GO:0046872,GO:0061630	ubiquitin ligase complex|protein polyubiquitination|cytoplasm|ubiquitin-dependent protein catabolic process|apoptotic process|integral component of membrane|ubiquitin conjugating enzyme binding|mitochondrial membrane|positive regulation of proteasomal ubiquitin-dependent protein catabolic process|negative regulation of apoptotic process|metal ion binding|ubiquitin protein ligase activity
RNF39	17.485	26.3556	8.61442	0.326961	-1.61281	0.00250164	0.0295452	Down	0.092414	0.0740584	0.0747646	0.214081	0.217554	0.30376	GeneID:101109493	ring finger protein 39	GO:0005737,GO:0046872	cytoplasm|metal ion binding
RRM2	57.1532	22.3118	91.9946	4.12227	2.04344	0.0187903	0.125824	Up	0.784633	1.17456	0.490352	0.0976745	0.063165	0.430281	GeneID:101118093	ribonucleotide reductase regulatory subunit M2			oas00230,oas00240,oas00480,oas00983,oas04115	Purine metabolism|Pyrimidine metabolism|Glutathione metabolism|Drug metabolism - other enzymes|p53 signaling pathway
RSPO3	707.101	1070.34	343.86	0.321258	-1.63819	0.000757113	0.0124977	Down	2.80676	3.31331	3.71763	13.7254	12.4875	4.43352	GeneID:101116995	R-spondin 3	GO:0001974,GO:0002040,GO:0005109,GO:0005615,GO:0008201,GO:0016055,GO:0090263,GO:2000052	blood vessel remodeling|sprouting angiogenesis|frizzled binding|extracellular space|heparin binding|Wnt signaling pathway|positive regulation of canonical Wnt signaling pathway|positive regulation of non-canonical Wnt signaling pathway	oas04310	Wnt signaling pathway
S1PR1	37.4664	56.7274	18.2055	0.321191	-1.6385	1.00747e-05	0.000416969	Down	0.141908	0.0865271	0.11231	0.360427	0.322069	0.374875	GeneID:101115839	sphingosine-1-phosphate receptor 1	GO:0001525,GO:0001664,GO:0001955,GO:0003245,GO:0003376,GO:0005654,GO:0005768,GO:0006935,GO:0007193,GO:0007420,GO:0008284,GO:0009897,GO:0016021,GO:0016477,GO:0030032,GO:0030155,GO:0030500,GO:0030595,GO:0031226,GO:0031532,GO:0038036,GO:0045121,GO:0045124,GO:0061384,GO:0072678	angiogenesis|G protein-coupled receptor binding|blood vessel maturation|cardiac muscle tissue growth involved in heart morphogenesis|sphingosine-1-phosphate receptor signaling pathway|nucleoplasm|endosome|chemotaxis|adenylate cyclase-inhibiting G protein-coupled receptor signaling pathway|brain development|positive regulation of cell proliferation|external side of plasma membrane|integral compone…	oas04068,oas04071,oas04080	FoxO signaling pathway|Sphingolipid signaling pathway|Neuroactive ligand-receptor interaction
SAMD11	37.5845	22.3601	52.8089	2.36085	1.23931	0.000685878	0.0115775	Up	0.346086	0.490427	0.512177	0.178538	0.190075	0.201786	GeneID:101108327	sterile alpha motif domain containing 11	GO:0005634	nucleus
SBK1	36.577	49.0155	24.1385	0.492804	-1.02092	0.0164246	0.114746	Down	0.159656	0.059974	0.146319	0.221106	0.163413	0.352836	GeneID:101120982	SH3 domain binding kinase 1	GO:0004674,GO:0005524,GO:0005737,GO:0018105,GO:0018107	protein serine/threonine kinase activity|ATP binding|cytoplasm|peptidyl-serine phosphorylation|peptidyl-threonine phosphorylation
SCNN1B	61.9199	90.4447	33.395	0.369633	-1.43584	4.70906e-06	0.000219901	Down	0.523507	0.267555	0.291715	1.15139	0.885753	0.88325	GeneID:100170325	sodium channel epithelial 1 beta subunit	GO:0005887,GO:0009897,GO:0015280,GO:0016324,GO:0030659,GO:0034706,GO:0035725,GO:0050699,GO:0050891,GO:0050896,GO:0050909,GO:0055078,GO:0070062	integral component of plasma membrane|external side of plasma membrane|ligand-gated sodium channel activity|apical plasma membrane|cytoplasmic vesicle membrane|sodium channel complex|sodium ion transmembrane transport|WW domain binding|multicellular organismal water homeostasis|response to stimulus|sensory perception of taste|sodium ion homeostasis|extracellular exosome	oas04742,oas04960	Taste transduction|Aldosterone-regulated sodium reabsorption
SEMA3D	2533.34	1680.82	3385.86	2.0144	1.01035	0.0082965	0.0701472	Up	15.5443	14.8568	15.0119	5.3079	5.49827	11.6364	GeneID:101113321	semaphorin 3D	GO:0001755,GO:0005615,GO:0005887,GO:0030215,GO:0030335,GO:0038191,GO:0045499,GO:0048843,GO:0050919,GO:0071526	neural crest cell migration|extracellular space|integral component of plasma membrane|semaphorin receptor binding|positive regulation of cell migration|neuropilin binding|chemorepellent activity|negative regulation of axon extension involved in axon guidance|negative chemotaxis|semaphorin-plexin signaling pathway	oas04360	Axon guidance
SERPINB11	15.6385	23.6861	7.59092	0.321054	-1.63911	0.00978539	0.0788833	Down	0.238836	0.102534	0.0517561	0.618567	0.244457	0.356838	GeneID:101104363	serpin family B member 11	GO:0004867,GO:0005615,GO:0005737,GO:0010951	serine-type endopeptidase inhibitor activity|extracellular space|cytoplasm|negative regulation of endopeptidase activity
SERPINF1	1960.84	2704.84	1216.84	0.449893	-1.15234	3.25395e-06	0.000162081	Down	31.5044	17.3957	22.0297	53.1881	50.1186	53.7093	GeneID:100192425	serpin family F member 1	GO:0004867,GO:0005576,GO:0005615,GO:0010951,GO:0016525,GO:0042470,GO:0050769,GO:0060770	serine-type endopeptidase inhibitor activity|extracellular region|extracellular space|negative regulation of endopeptidase activity|negative regulation of angiogenesis|melanosome|positive regulation of neurogenesis|negative regulation of epithelial cell proliferation involved in prostate gland development	oas04310	Wnt signaling pathway
SGIP1	3.49417	0.670182	6.31815	9.44805	3.24002	0.0277052	0.161521	Up	0.0243259	0.0487355	0.0196801	0	0.00995934	0	GeneID:101112175	SH3 domain GRB2 like endophilin interacting protein 1	GO:0002021,GO:0005543,GO:0005737,GO:0005829,GO:0005856,GO:0005886,GO:0005905,GO:0008017,GO:0008092,GO:0015631,GO:0017124,GO:0030122,GO:0030136,GO:0048260,GO:0048268,GO:0061024,GO:0072583,GO:0097009,GO:0097320,GO:2000253	response to dietary excess|phospholipid binding|cytoplasm|cytosol|cytoskeleton|plasma membrane|clathrin-coated pit|microtubule binding|cytoskeletal protein binding|tubulin binding|SH3 domain binding|AP-2 adaptor complex|clathrin-coated vesicle|positive regulation of receptor-mediated endocytosis|clathrin coat assembly|membrane organization|clathrin-dependent endocytosis|energy homeostasis|plasma …
SGO1	17.1411	6.34393	27.9382	4.4025	2.13832	0.000444926	0.00829428	Up	0.212123	0.444292	0.15601	0.0679789	0.0690818	0.0480191	GeneID:101116014	shugoshin 1	GO:0000775,GO:0000776,GO:0000777,GO:0000779,GO:0000922,GO:0005654,GO:0005813,GO:0005829,GO:0007059,GO:0008608,GO:0010457,GO:0019900,GO:0045132,GO:0051301,GO:0071962	chromosome, centromeric region|kinetochore|condensed chromosome kinetochore|condensed chromosome, centromeric region|spindle pole|nucleoplasm|centrosome|cytosol|chromosome segregation|attachment of spindle microtubules to kinetochore|centriole-centriole cohesion|kinase binding|meiotic chromosome segregation|cell division|mitotic sister chromatid cohesion, centromeric	oas04114	Oocyte meiosis
SHCBP1	16.4528	7.66166	25.2439	3.29148	1.71874	0.00666715	0.0594889	Up	0.219151	0.338438	0.138513	0.0643786	0.0186923	0.127332	GeneID:101113521	SHC binding and spindle associated 1	GO:0005737,GO:0005819,GO:0008543,GO:0030496,GO:0042169,GO:2000177	cytoplasm|spindle|fibroblast growth factor receptor signaling pathway|midbody|SH2 domain binding|regulation of neural precursor cell proliferation
SKA1	6.65032	2.66775	10.6329	3.98219	1.99356	0.0254929	0.152971	Up	0.117457	0.184893	0.237562	0.0338004	0.0343488	0.0668528	GeneID:101117037	spindle and kinetochore associated complex subunit 1	GO:0000278,GO:0000940,GO:0005737,GO:0005876,GO:0007059,GO:0008017,GO:0031110,GO:0051301	mitotic cell cycle|condensed chromosome outer kinetochore|cytoplasm|spindle microtubule|chromosome segregation|microtubule binding|regulation of microtubule polymerization or depolymerization|cell division
SLC17A7	10.6853	16.7125	4.65804	0.278377	-1.84489	0.0126255	0.0943818	Down	0.0274666	0.0641989	0.0370349	0.13832	0.253016	0.0729546	GeneID:101111653	solute carrier family 17 member 7	GO:0005313,GO:0005326,GO:0007616,GO:0008068,GO:0015319,GO:0015321,GO:0016021,GO:0030054,GO:0030285,GO:0030672,GO:0035249,GO:0042137,GO:0044300,GO:0048786,GO:0051938,GO:0060076,GO:0097401,GO:0098700,GO:0098794	L-glutamate transmembrane transporter activity|neurotransmitter transporter activity|long-term memory|extracellularly glutamate-gated chloride channel activity|sodium:inorganic phosphate symporter activity|sodium-dependent phosphate transmembrane transporter activity|integral component of membrane|cell junction|integral component of synaptic vesicle membrane|synaptic vesicle membrane|synaptic tra…	oas04721,oas04723,oas04724,oas05033	Synaptic vesicle cycle|Retrograde endocannabinoid signaling|Glutamatergic synapse|Nicotine addiction
SLC18A2	241.196	327.698	154.693	0.47209	-1.08287	0.018971	0.126557	Down	2.55083	1.62187	2.99664	6.30754	6.26917	2.58638	GeneID:101104796	solute carrier family 18 member A2	GO:0005335,GO:0006836,GO:0008504,GO:0015238,GO:0015842,GO:0016021,GO:0030672,GO:0035864,GO:0042583,GO:0043195,GO:0097159	serotonin:sodium symporter activity|neurotransmitter transport|monoamine transmembrane transporter activity|drug transmembrane transporter activity|aminergic neurotransmitter loading into synaptic vesicle|integral component of membrane|synaptic vesicle membrane|response to potassium ion|chromaffin granule|terminal bouton|organic cyclic compound binding	oas04721,oas04726,oas04728,oas05012,oas05030,oas05031,oas05034	Synaptic vesicle cycle|Serotonergic synapse|Dopaminergic synapse|Parkinson disease|Cocaine addiction|Amphetamine addiction|Alcoholism
SLC25A47	32.6296	44.7263	20.5328	0.45931	-1.12246	0.00597	0.0547307	Down	0.167555	0.0915506	0.215655	0.421899	0.319609	0.288268	GeneID:101119167	solute carrier family 25 member 47	GO:0005743,GO:0006844,GO:0015227,GO:0016021	mitochondrial inner membrane|acyl carnitine transport|acyl carnitine transmembrane transporter activity|integral component of membrane
SLC27A3	26.1768	38.4163	13.9373	0.362765	-1.46289	0.00151867	0.0207498	Down	0.134728	0.146207	0.193016	0.474939	0.574577	0.257208	GeneID:101101860	solute carrier family 27 member 3	GO:0000166,GO:0004467,GO:0005324,GO:0005739,GO:0005783,GO:0016020,GO:0016021,GO:0031957,GO:0031966	nucleotide binding|long-chain fatty acid-CoA ligase activity|long-chain fatty acid transporter activity|mitochondrion|endoplasmic reticulum|membrane|integral component of membrane|very long-chain fatty acid-CoA ligase activity|mitochondrial membrane	oas04931	Insulin resistance
SLC2A9	13.0174	22.3953	3.63956	0.162759	-2.61919	0.000319596	0.00648141	Down	0.0688951	0.0414081	0.041803	0.29144	0.507718	0.137245	GeneID:101104402	solute carrier family 2 member 9	GO:0008643,GO:0016021,GO:0022857	carbohydrate transport|integral component of membrane|transmembrane transporter activity
SLC38A5	25.4786	39.0385	11.9187	0.30552	-1.71066	0.000202362	0.0045817	Down	0.218068	0.124825	0.220526	0.768726	0.478285	0.589558	GeneID:101113465	solute carrier family 38 member 5	GO:0003333,GO:0005887,GO:0015171,GO:0015187,GO:0015816	amino acid transmembrane transport|integral component of plasma membrane|amino acid transmembrane transporter activity|glycine transmembrane transporter activity|glycine transport	oas04727	GABAergic synapse
SLC46A2	55.5164	84.2079	26.8249	0.318602	-1.65017	0.0349391	0.186409	Down	0.367019	0.237193	0.359183	1.55018	1.26026	0.212265	GeneID:101120639	solute carrier family 46 member 2	GO:0005886,GO:0009986,GO:0015293,GO:0016021,GO:0043029,GO:0045580,GO:0048538,GO:0070233	plasma membrane|cell surface|symporter activity|integral component of membrane|T cell homeostasis|regulation of T cell differentiation|thymus development|negative regulation of T cell apoptotic process
SLC6A2	52.4816	78.1589	26.8044	0.343273	-1.54257	6.66641e-06	0.000296428	Down	0.163956	0.100368	0.10593	0.334857	0.480135	0.263107	GeneID:101116078	solute carrier family 6 member 2	GO:0005328,GO:0005330,GO:0005334,GO:0005886,GO:0005887,GO:0015874,GO:0032809,GO:0042734,GO:0043005,GO:0046872,GO:0051583	neurotransmitter:sodium symporter activity|dopamine:sodium symporter activity|norepinephrine:sodium symporter activity|plasma membrane|integral component of plasma membrane|norepinephrine transport|neuronal cell body membrane|presynaptic membrane|neuron projection|metal ion binding|dopamine uptake involved in synaptic transmission	oas04721	Synaptic vesicle cycle
SOLD1	18.1453	25.0238	11.2667	0.450346	-1.15089	0.0232161	0.144813	Down	0.187764	0.141065	0.205703	0.378227	0.352334	0.451968	GeneID:100381247	secreted protein of Ly-6 domain 1	GO:0005576	extracellular region
SPATC1L	9.17008	15.0279	3.31224	0.220569	-2.1807	0.00633404	0.0572726	Down	0.0932733	0.0700753	0.0707436	0.540178	0.358006	0.162583	GeneID:101112184	spermatogenesis and centriole associated 1 like	GO:0005813	centrosome
SRPX2	525.538	796.494	254.582	0.319676	-1.64532	1.64893e-38	1.17041e-34	Down	3.42312	3.01451	3.23346	11.0504	10.434	8.71755	GeneID:101109862	sushi repeat containing protein X-linked 2	GO:0001525,GO:0005102,GO:0005615,GO:0005737,GO:0009986,GO:0030054,GO:0036458,GO:0042325,GO:0042802,GO:0048870,GO:0051965,GO:0060076,GO:0090050,GO:0097060,GO:0098609	angiogenesis|signaling receptor binding|extracellular space|cytoplasm|cell surface|cell junction|hepatocyte growth factor binding|regulation of phosphorylation|identical protein binding|cell motility|positive regulation of synapse assembly|excitatory synapse|positive regulation of cell migration involved in sprouting angiogenesis|synaptic membrane|cell-cell adhesion
STAR	38.9114	25.0398	52.7829	2.10772	1.07568	0.00299892	0.0337076	Up	1.08795	1.35622	1.41805	0.779217	0.61864	0.433459	GeneID:443122	steroidogenic acute regulatory protein	GO:0005739,GO:0006694,GO:0008203,GO:0015485,GO:0017127	mitochondrion|steroid biosynthetic process|cholesterol metabolic process|cholesterol binding|cholesterol transporter activity	oas04913,oas04925,oas04927,oas04934,oas04979	Ovarian steroidogenesis|Aldosterone synthesis and secretion|Cortisol synthesis and secretion|Cushing syndrome|Cholesterol metabolism
STC1	403.41	608.978	197.842	0.324887	-1.62199	0.000116143	0.00298149	Down	1.51223	1.17022	1.61625	5.47883	5.51637	2.22725	GeneID:101112949	stanniocalcin 1	GO:0001886,GO:0003421,GO:0005179,GO:0005615,GO:0005634,GO:0005737,GO:0006874,GO:0010596,GO:0035988,GO:0044070,GO:0051926,GO:0086004,GO:0090280,GO:1903403	endothelial cell morphogenesis|growth plate cartilage axis specification|hormone activity|extracellular space|nucleus|cytoplasm|cellular calcium ion homeostasis|negative regulation of endothelial cell migration|chondrocyte proliferation|regulation of anion transport|negative regulation of calcium ion transport|regulation of cardiac muscle cell contraction|positive regulation of calcium ion import…
STX1A	15.1486	22.0049	8.29228	0.37672	-1.40843	0.016172	0.11354	Down	0.0934709	0.0936316	0.10634	0.247125	0.155464	0.372405	GeneID:101112696	syntaxin 1A	GO:0000149,GO:0005484,GO:0005886,GO:0006886,GO:0006887,GO:0006906,GO:0008021,GO:0010701,GO:0012505,GO:0016021,GO:0030054,GO:0030672,GO:0031201,GO:0031629,GO:0033605,GO:0042734,GO:0043005,GO:0045956,GO:0048278,GO:0048787	SNARE binding|SNAP receptor activity|plasma membrane|intracellular protein transport|exocytosis|vesicle fusion|synaptic vesicle|positive regulation of norepinephrine secretion|endomembrane system|integral component of membrane|cell junction|synaptic vesicle membrane|SNARE complex|synaptic vesicle fusion to presynaptic active zone membrane|positive regulation of catecholamine secretion|presynaptic…	oas04130,oas04721,oas04911,oas05031	SNARE interactions in vesicular transport|Synaptic vesicle cycle|Insulin secretion|Amphetamine addiction
TAC3	40.681	61.4682	19.8938	0.323717	-1.62719	4.63721e-05	0.00141898	Down	0.642355	0.500469	1.01048	2.22847	3.03167	1.38627	GeneID:443213	tachykinin 3	GO:0005576,GO:0007217,GO:0007218	extracellular region|tachykinin receptor signaling pathway|neuropeptide signaling pathway	oas04080	Neuroactive ligand-receptor interaction
TENM1	30.7335	19.0297	42.4373	2.2304	1.1573	0.00640744	0.0576426	Up	0.0846594	0.0624879	0.139686	0.0426341	0.0478864	0.0377242	GeneID:101117563	teneurin transmembrane protein 1	GO:0005576,GO:0005634,GO:0005737,GO:0005783,GO:0005794,GO:0005856,GO:0005886,GO:0005887,GO:0006359,GO:0007157,GO:0007218,GO:0016363,GO:0016607,GO:0030838,GO:0033138,GO:0042803,GO:0043005,GO:0043406,GO:0046982,GO:0048471,GO:0048666,GO:0050839,GO:0051491,GO:0090316	extracellular region|nucleus|cytoplasm|endoplasmic reticulum|Golgi apparatus|cytoskeleton|plasma membrane|integral component of plasma membrane|regulation of transcription by RNA polymerase III|heterophilic cell-cell adhesion via plasma membrane cell adhesion molecules|neuropeptide signaling pathway|nuclear matrix|nuclear speck|positive regulation of actin filament polymerization|positive regulat…
TFPI	108.771	60.0578	157.484	2.62201	1.39067	8.75522e-09	9.86422e-07	Up	1.26003	1.17955	1.13771	0.309718	0.460599	0.59017	GeneID:101120391	tissue factor pathway inhibitor			oas04610	Complement and coagulation cascades
TGFB2	45.643	71.7296	19.5565	0.272681	-1.87471	1.42645e-07	1.10054e-05	Down	0.125281	0.107568	0.12066	0.540778	0.317519	0.433777	GeneID:554322	transforming growth factor beta 2	GO:0000902,GO:0001540,GO:0001558,GO:0001654,GO:0001666,GO:0001822,GO:0001837,GO:0001942,GO:0003007,GO:0005102,GO:0005114,GO:0005125,GO:0005160,GO:0005576,GO:0005604,GO:0005615,GO:0005737,GO:0005802,GO:0006468,GO:0007050,GO:0007179,GO:0007435,GO:0007507,GO:0007519,GO:0007565,GO:0007568,GO:0008083,GO:0008219,GO:0008284,GO:0008285,GO:0008347,GO:0009314,GO:0009409,GO:0009611,GO:0009986,GO:0010002,GO:…	cell morphogenesis|amyloid-beta binding|regulation of cell growth|eye development|response to hypoxia|kidney development|epithelial to mesenchymal transition|hair follicle development|heart morphogenesis|signaling receptor binding|type II transforming growth factor beta receptor binding|cytokine activity|transforming growth factor beta receptor binding|extracellular region|basement membrane|extra…	oas04010,oas04060,oas04068,oas04110,oas04218,oas04350,oas04380,oas04390,oas04933,oas05140,oas05142,oas05144,oas05145,oas05146,oas05152,oas05161,oas05166,oas05200,oas05205,oas05206,oas05210,oas05211,oas05212,oas05220,oas05225,oas05226,oas05321,oas05323,oas05410,oas05414	MAPK signaling pathway|Cytokine-cytokine receptor interaction|FoxO signaling pathway|Cell cycle|Cellular senescence|TGF-beta signaling pathway|Osteoclast differentiation|Hippo signaling pathway|AGE-RAGE signaling pathway in diabetic complications|Leishmaniasis|Chagas disease (American trypanosomiasis)|Malaria|Toxoplasmosis|Amoebiasis|Tuberculosis|Hepatitis B|Human T-cell leukemia virus 1 infectio…
TICRR	9.32824	4.33671	14.3198	3.29847	1.7218	0.0255854	0.153253	Up	0.0350071	0.105202	0.0486774	0.0132221	0.0179154	0.0261515	GeneID:101123667	TOPBP1 interacting checkpoint and replication regulator	GO:0001731,GO:0003682,GO:0005634,GO:0005654,GO:0006260,GO:0006281,GO:0007093,GO:0010212,GO:0030174,GO:0033314	formation of translation preinitiation complex|chromatin binding|nucleus|nucleoplasm|DNA replication|DNA repair|mitotic cell cycle checkpoint|response to ionizing radiation|regulation of DNA-dependent DNA replication initiation|mitotic DNA replication checkpoint
TLR9	40.3523	61.452	19.2526	0.313221	-1.67475	8.77208e-05	0.00239018	Down	0.146594	0.181398	0.174408	0.799038	0.564871	0.240495	GeneID:494547	toll like receptor 9	GO:0002237,GO:0002639,GO:0002755,GO:0004888,GO:0005764,GO:0005768,GO:0005783,GO:0005789,GO:0006954,GO:0008329,GO:0016021,GO:0030890,GO:0032009,GO:0034162,GO:0034163,GO:0034165,GO:0035197,GO:0042803,GO:0043410,GO:0045078,GO:0045087,GO:0045322,GO:0045356,GO:0045359,GO:0045577,GO:0050707,GO:0050729,GO:0050871	response to molecule of bacterial origin|positive regulation of immunoglobulin production|MyD88-dependent toll-like receptor signaling pathway|transmembrane signaling receptor activity|lysosome|endosome|endoplasmic reticulum|endoplasmic reticulum membrane|inflammatory response|signaling pattern recognition receptor activity|integral component of membrane|positive regulation of B cell proliferatio…	oas04620,oas05142,oas05143,oas05144,oas05152,oas05162,oas05168,oas05235	Toll-like receptor signaling pathway|Chagas disease (American trypanosomiasis)|African trypanosomiasis|Malaria|Tuberculosis|Measles|Herpes simplex virus 1 infection|PD-L1 expression and PD-1 checkpoint pathway in cancer
TMCC3	119.27	168.284	70.2562	0.417614	-1.25976	3.01441e-08	2.91106e-06	Down	0.410741	0.355572	0.312811	0.715028	1.06918	0.798031	GeneID:101116038	transmembrane and coiled-coil domain family 3	GO:0016021	integral component of membrane
TMEM190	388.47	593.064	183.875	0.310039	-1.68948	0.00636588	0.0575074	Down	1.46875	1.58525	2.70911	8.46957	7.92944	2.19441	GeneID:101120518	transmembrane protein 190	GO:0002079,GO:0002244,GO:0016021,GO:0043621	inner acrosomal membrane|hematopoietic progenitor cell differentiation|integral component of membrane|protein self-association
TMEM229B	12.2653	6.67334	17.8573	2.67724	1.42075	0.027907	0.162155	Up	0.0770031	0.0370251	0.0529524	0.0124091	0.0220682	0.0276115	GeneID:101114112	transmembrane protein 229B	GO:0009617,GO:0016021	response to bacterium|integral component of membrane
TMEM240	19.4994	27.3813	11.6175	0.42417	-1.23729	0.012249	0.0922182	Down	0.245423	0.295015	0.322647	0.692127	0.803836	0.537796	GeneID:101103496	transmembrane protein 240	GO:0016021,GO:0030054,GO:0097060	integral component of membrane|cell junction|synaptic membrane
TMEM244	13.1802	22.0613	4.29923	0.195181	-2.35712	0.00135035	0.0190932	Down	0.0955842	0.0191497	0.135326	0.423595	0.684834	0.171371	GeneID:101117674	transmembrane protein 244	GO:0016021	integral component of membrane
TMEM269	8.16539	12.3614	3.96939	0.32155	-1.63688	0.042203	0.210289	Down	0.0294844	0.011814	0.0298168	0.0890892	0.0965703	0.0352414	GeneID:101102610	transmembrane protein 269	GO:0016021	integral component of membrane
TMEM95	16.664	22.7157	10.6124	0.467267	-1.09768	0.0463964	0.224486	Down	0.43499	0.472049	0.256604	0.693686	1.18727	0.613799	GeneID:101118625	transmembrane protein 95	GO:0016021	integral component of membrane
TNFRSF13B	3.80201	0.997726	6.6063	6.61214	2.72512	0.0427674	0.211827	Up	0.253079	0.115234	0.0930661	0	0	0.0687486	GeneID:101122200	TNF receptor superfamily member 13B			oas04060,oas04672,oas05340	Cytokine-cytokine receptor interaction|Intestinal immune network for IgA production|Primary immunodeficiency
TNFSF15	105.918	152.366	59.4692	0.390386	-1.35703	0.0449447	0.21903	Down	1.09921	0.468555	0.543977	2.43802	2.34591	0.617319	GeneID:101102957	TNF superfamily member 15			oas04060	Cytokine-cytokine receptor interaction
TNNI3	4.63851	1.66791	7.6091	4.5629	2.18995	0.0491687	0.23321	Up	0.354074	0.225707	0.162757	0	0.065892	0.0961838	GeneID:101121961	troponin I3, cardiac type	GO:0000287,GO:0001570,GO:0001980,GO:0003009,GO:0005524,GO:0005861,GO:0006874,GO:0006936,GO:0010882,GO:0016887,GO:0019855,GO:0019901,GO:0019904,GO:0030172,GO:0031014,GO:0032780,GO:0048306,GO:0051015,GO:0055010,GO:0060048,GO:0097512,GO:1990584	magnesium ion binding|vasculogenesis|regulation of systemic arterial blood pressure by ischemic conditions|skeletal muscle contraction|ATP binding|troponin complex|cellular calcium ion homeostasis|muscle contraction|regulation of cardiac muscle contraction by calcium ion signaling|ATPase activity|calcium channel inhibitor activity|protein kinase binding|protein domain specific binding|troponin C …	oas04024,oas04260,oas04261,oas05410,oas05414	cAMP signaling pathway|Cardiac muscle contraction|Adrenergic signaling in cardiomyocytes|Hypertrophic cardiomyopathy (HCM)|Dilated cardiomyopathy (DCM)
TP63	4.98381	1.67002	8.2976	4.96973	2.31317	0.0269236	0.158358	Up	0.0266399	0.0333571	0.0235727	0.00670786	0.00681669	0.00331682	GeneID:101108874	tumor protein p63			oas05206	MicroRNAs in cancer
TROAP	6.65382	1.66896	11.6387	6.97027	2.80121	0.00444523	0.0446015	Up	0.0954152	0.191159	0.0857696	0.0106779	0.0217023	0.0211195	GeneID:101119203	trophinin associated protein	GO:0005737,GO:0007155	cytoplasm|cell adhesion
TSPAN32	10.684	18.0425	3.3254	0.184098	-2.44146	0.00388722	0.0406355	Down	0.0439261	0.0880033	0.0148071	0.427672	0.314718	0.0583365	GeneID:101120369	tetraspanin 32	GO:0005622,GO:0005887,GO:0007010,GO:0007166,GO:0007229,GO:0007267,GO:0008285,GO:0009986,GO:0030886,GO:0042832,GO:0050688,GO:0070442,GO:0070527	intracellular|integral component of plasma membrane|cytoskeleton organization|cell surface receptor signaling pathway|integrin-mediated signaling pathway|cell-cell signaling|negative regulation of cell proliferation|cell surface|negative regulation of myeloid dendritic cell activation|defense response to protozoan|regulation of defense response to virus|integrin alphaIIb-beta3 complex|platelet ag…
TTC9B	13.3568	21.3909	5.32273	0.248599	-2.00811	0.0114961	0.088311	Down	0.00829891	0.0249396	0.10071	0.242399	0.254826	0.0413305	GeneID:101118044	tetratricopeptide repeat domain 9B
TTK	16.9736	10.6857	23.2615	2.17627	1.12186	0.0369361	0.19361	Up	0.0797757	0.13459	0.080675	0.0422891	0.0558678	0.0376391	GeneID:101113682	TTK protein kinase	GO:0000776,GO:0004674,GO:0004712,GO:0004713,GO:0005524,GO:0005737,GO:0005819,GO:0007051,GO:0007052,GO:0007094,GO:0008284,GO:0010862,GO:0016020,GO:0016321,GO:0018105,GO:0018107,GO:0033316,GO:0034501,GO:0042803,GO:0043515,GO:0046777,GO:0051304,GO:1903096	kinetochore|protein serine/threonine kinase activity|protein serine/threonine/tyrosine kinase activity|protein tyrosine kinase activity|ATP binding|cytoplasm|spindle|spindle organization|mitotic spindle organization|mitotic spindle assembly checkpoint|positive regulation of cell proliferation|positive regulation of pathway-restricted SMAD protein phosphorylation|membrane|female meiosis chromosome…	oas04110	Cell cycle
TTR	6.17445	10.3458	2.0031	0.192936	-2.3738	0.0201124	0.131453	Down	0.0433736	0.217241	0	0.655282	0.355154	0.345616	GeneID:443389	transthyretin	GO:0005179,GO:0005576,GO:0042572,GO:0042802,GO:0070324,GO:0070327	hormone activity|extracellular region|retinol metabolic process|identical protein binding|thyroid hormone binding|thyroid hormone transport	oas04918	Thyroid hormone synthesis
UHRF1	33.7629	13.0089	54.517	4.18787	2.06622	2.17794e-06	0.000116688	Up	0.288328	0.53063	0.284797	0.101303	0.0617678	0.100182	GeneID:101113067	ubiquitin like with PHD and ring finger domains 1	GO:0000122,GO:0000790,GO:0000791,GO:0000792,GO:0004842,GO:0005657,GO:0005720,GO:0006281,GO:0006511,GO:0007049,GO:0008270,GO:0010216,GO:0010390,GO:0016363,GO:0016567,GO:0016574,GO:0031493,GO:0035064,GO:0042393,GO:0042802,GO:0044729,GO:0051865,GO:0061630	negative regulation of transcription by RNA polymerase II|nuclear chromatin|euchromatin|heterochromatin|ubiquitin-protein transferase activity|replication fork|nuclear heterochromatin|DNA repair|ubiquitin-dependent protein catabolic process|cell cycle|zinc ion binding|maintenance of DNA methylation|histone monoubiquitination|nuclear matrix|protein ubiquitination|histone ubiquitination|nucleosomal…
UNC5B	495.043	694.69	295.396	0.425343	-1.2333	3.24493e-16	1.77173e-13	Down	1.42677	0.999264	1.13339	3.23833	2.82307	2.28806	GeneID:101107068	unc-5 netrin receptor B	GO:0001525,GO:0005042,GO:0005886,GO:0006915,GO:0014068,GO:0016021,GO:0033564,GO:0043524,GO:0045121,GO:2001240	angiogenesis|netrin receptor activity|plasma membrane|apoptotic process|positive regulation of phosphatidylinositol 3-kinase signaling|integral component of membrane|anterior/posterior axon guidance|negative regulation of neuron apoptotic process|membrane raft|negative regulation of extrinsic apoptotic signaling pathway in absence of ligand	oas04360	Axon guidance
VIPR1	17.2093	1.00024	33.4184	33.3922	5.06144	1.42089e-07	1.10054e-05	Up	0.454042	0.262787	0.306107	0	0.0103273	0.0200999	GeneID:100500782	vasoactive intestinal peptide receptor 1	GO:0004999,GO:0005886,GO:0007166,GO:0008528,GO:0016021,GO:0017046	vasoactive intestinal polypeptide receptor activity|plasma membrane|cell surface receptor signaling pathway|G protein-coupled peptide receptor activity|integral component of membrane|peptide hormone binding	oas04080	Neuroactive ligand-receptor interaction
WDR66	12.3408	19.3663	5.31519	0.274256	-1.8664	0.00603149	0.055134	Down	0.0286678	0.0430757	0.0434865	0.216555	0.132041	0.0713861	GeneID:101103268	WD repeat domain 66	GO:0003341,GO:0005930,GO:0031514	cilium movement|axoneme|motile cilium
WNK4	21.157	29.0755	13.2385	0.455748	-1.13369	0.0295301	0.167695	Down	0.115449	0.0680282	0.08928	0.150479	0.326694	0.121757	GeneID:101111820	WNK lysine deficient protein kinase 4	GO:0004674,GO:0005524,GO:0005737,GO:0005829,GO:0005923,GO:0006468,GO:0006811,GO:0006821,GO:0008104,GO:0010766,GO:0016020,GO:0019869,GO:0019870,GO:0032414,GO:0035556,GO:0050794,GO:0050801,GO:0070294,GO:0072156,GO:0090188,GO:1903288,GO:2000651	protein serine/threonine kinase activity|ATP binding|cytoplasm|cytosol|bicellular tight junction|protein phosphorylation|ion transport|chloride transport|protein localization|negative regulation of sodium ion transport|membrane|chloride channel inhibitor activity|potassium channel inhibitor activity|positive regulation of ion transmembrane transporter activity|intracellular signal transduction|re…
XPNPEP2	2287.24	3357.55	1216.93	0.362459	-1.46411	5.38582e-06	0.000245843	Down	11.4923	5.85855	7.02921	24.8121	23.8837	18.344	GeneID:101120054	X-prolyl aminopeptidase 2	GO:0005886,GO:0031225,GO:0046872,GO:0070006	plasma membrane|anchored component of membrane|metal ion binding|metalloaminopeptidase activity	oas04974	Protein digestion and absorption
XRCC3	15.1281	9.01103	21.2451	2.35706	1.23699	0.0277977	0.161694	Up	0.268982	0.329321	0.362685	0.0903054	0.152951	0.163728	GeneID:105603311	X-ray repair cross complementing 3	GO:0000400,GO:0000722,GO:0000724,GO:0005524,GO:0005634,GO:0005654,GO:0005657,GO:0005737,GO:0005759,GO:0005829,GO:0008094,GO:0008821,GO:0010824,GO:0033065,GO:0036297,GO:0045003,GO:0048471,GO:0071140,GO:0090267,GO:0090656	four-way junction DNA binding|telomere maintenance via recombination|double-strand break repair via homologous recombination|ATP binding|nucleus|nucleoplasm|replication fork|cytoplasm|mitochondrial matrix|cytosol|DNA-dependent ATPase activity|crossover junction endodeoxyribonuclease activity|regulation of centrosome duplication|Rad51C-XRCC3 complex|interstrand cross-link repair|double-strand brea…	oas03440	Homologous recombination
ZBTB46	15.993	9.34028	22.6458	2.42202	1.27621	0.0316624	0.175715	Up	0.0581729	0.192301	0.147072	0.0585912	0.0416793	0.0637372	GeneID:101117096	zinc finger and BTB domain containing 46	GO:0000981,GO:0003676,GO:0005634,GO:0030853,GO:0045650,GO:0045656,GO:0046872,GO:2001199,GO:2001200	DNA-binding transcription factor activity, RNA polymerase II-specific|nucleic acid binding|nucleus|negative regulation of granulocyte differentiation|negative regulation of macrophage differentiation|negative regulation of monocyte differentiation|metal ion binding|negative regulation of dendritic cell differentiation|positive regulation of dendritic cell differentiation
ZFR2	6.33575	10.6815	1.98995	0.186291	-2.42437	0.0123831	0.0929122	Down	0.0071558	0.0071681	0.00723646	0.0648653	0.0292967	0.0213825	GeneID:101116907	zinc finger RNA binding protein 2	GO:0003725,GO:0003727,GO:0005634,GO:0008270	double-stranded RNA binding|single-stranded RNA binding|nucleus|zinc ion binding

## Sheet: M3_OE-vs-NC
gene_id	BaseMean_DESeq2	BaseMean_control_NC	BaseMean_case_M3_OE	FoldChange	log2FoldChange	p-value	q-value	Regulation	Expression_M3_OE1	Expression_M3_OE2	Expression_M3_OE3	Expression_NC1	Expression_NC2	Expression_NC3	gene_Dbxref	description	GO_id	GO_term	pathway	pathway_description
A4GALT	230.772	324.262	137.281	0.423399	-1.23991	2.20078e-08	4.7983e-07	Down	1.12699	0.73862	0.889031	2.7092	1.97696	1.38157	GeneID:101106675	alpha 1,4-galactosyltransferase (P blood group)			oas00601,oas00603	Glycosphingolipid biosynthesis - lacto and neolacto series|Glycosphingolipid biosynthesis - globo and isoglobo series
ABAT	28.8994	18.8774	38.9214	2.06147	1.04368	0.0126319	0.0506378	Up	0.190292	0.287482	0.233006	0.0891845	0.0966736	0.135236	GeneID:101105462	4-aminobutyrate aminotransferase	GO:0003867,GO:0005739,GO:0005759,GO:0005829,GO:0009450,GO:0030170,GO:0032144,GO:0032145,GO:0034386,GO:0042135,GO:0042803,GO:0046872,GO:0047298,GO:0048148,GO:0051537	4-aminobutyrate transaminase activity|mitochondrion|mitochondrial matrix|cytosol|gamma-aminobutyric acid catabolic process|pyridoxal phosphate binding|4-aminobutyrate transaminase complex|succinate-semialdehyde dehydrogenase binding|4-aminobutyrate:2-oxoglutarate transaminase activity|neurotransmitter catabolic process|protein homodimerization activity|metal ion binding|(S)-3-amino-2-methylpropio…	oas00250,oas00280,oas00410,oas00640,oas00650,oas04727	Alanine, aspartate and glutamate metabolism|Valine, leucine and isoleucine degradation|beta-Alanine metabolism|Propanoate metabolism|Butanoate metabolism|GABAergic synapse
ABCA12	58.7436	36.7123	80.7749	2.19955	1.13721	0.000175962	0.00144168	Up	0.193101	0.265472	0.289648	0.114635	0.0919698	0.110383	GeneID:101104887	ATP binding cassette subfamily A member 12			oas02010	ABC transporters
ABCA7	224.479	321.487	127.472	0.396566	-1.33437	7.55651e-14	4.32724e-12	Down	0.496157	0.450361	0.435535	1.1925	1.22261	0.837379	GeneID:101116568	ATP binding cassette subfamily A member 7			oas02010	ABC transporters
ABCB11	2.71649	0.349667	5.08332	13.5151	3.7565	0.0264066	0.0896504	Up	0.0193831	0.00773072	0.0352451	0.00399712	0	0	GeneID:101121238	ATP binding cassette subfamily B member 11			oas01522,oas02010,oas04976,oas04979	Endocrine resistance|ABC transporters|Bile secretion|Cholesterol metabolism
ABCB9	76.6264	40.2183	113.034	2.81021	1.49068	2.74275e-08	5.8899e-07	Up	0.915543	0.835518	1.02676	0.375999	0.284542	0.261078	GeneID:101119252	ATP binding cassette subfamily B member 9			oas02010,oas04142	ABC transporters|Lysosome
ABI3BP	5671.25	3541.49	7801	2.20275	1.13931	1.94032e-37	1.84446e-34	Up	33.3094	34.7576	36.2633	16.0992	15.6835	12.4079	GeneID:101108803	ABI family member 3 binding protein	GO:0005201,GO:0005518,GO:0005576,GO:0005614,GO:0005615,GO:0008201,GO:0010811,GO:0030198,GO:0062023	extracellular matrix structural constituent|collagen binding|extracellular region|interstitial matrix|extracellular space|heparin binding|positive regulation of cell-substrate adhesion|extracellular matrix organization|collagen-containing extracellular matrix
ACKR1	24.5017	32.8891	16.1144	0.490269	-1.02836	0.0242745	0.083951	Down	0.199234	0.17879	0.130822	0.369768	0.386205	0.213311	GeneID:101113185	atypical chemokine receptor 1 (Duffy blood group)	GO:0004930,GO:0005769,GO:0006954,GO:0016021,GO:0019957,GO:0032642,GO:0055037,GO:0070098	G protein-coupled receptor activity|early endosome|inflammatory response|integral component of membrane|C-C chemokine binding|regulation of chemokine production|recycling endosome|chemokine-mediated signaling pathway	oas05144	Malaria
ACKR4	7.56369	3.14631	11.9811	3.80987	1.92974	0.0273803	0.0919275	Up	0.15582	0.18644	0.0524691	0.0428434	0.0217693	0.031777	GeneID:101119176	atypical chemokine receptor 4	GO:0004950,GO:0005044,GO:0005769,GO:0006935,GO:0006955,GO:0007204,GO:0009897,GO:0016021,GO:0016493,GO:0019722,GO:0019956,GO:0019957,GO:0055037,GO:0060326	chemokine receptor activity|scavenger receptor activity|early endosome|chemotaxis|immune response|positive regulation of cytosolic calcium ion concentration|external side of plasma membrane|integral component of membrane|C-C chemokine receptor activity|calcium-mediated signaling|chemokine binding|C-C chemokine binding|recycling endosome|cell chemotaxis	oas04060	Cytokine-cytokine receptor interaction
ADAMTS17	494.219	688.819	299.618	0.43496	-1.20105	0.0056806	0.0267856	Down	1.61333	0.871165	1.62102	2.1362	2.33854	4.30451	GeneID:101110624	ADAM metallopeptidase with thrombospondin type 1 motif 17	GO:0003676,GO:0004222,GO:0005576,GO:0046872	nucleic acid binding|metalloendopeptidase activity|extracellular region|metal ion binding
ADCY4	64.3887	87.0735	41.704	0.479185	-1.06134	0.000340345	0.002565	Down	0.384859	0.23276	0.216697	0.494399	0.555307	0.572561	GeneID:101119139	adenylate cyclase 4	GO:0003091,GO:0004016,GO:0005080,GO:0005524,GO:0005737,GO:0005886,GO:0005887,GO:0006171,GO:0007186,GO:0007188,GO:0007189,GO:0007193,GO:0016020,GO:0030425,GO:0046872,GO:0071377	renal water homeostasis|adenylate cyclase activity|protein kinase C binding|ATP binding|cytoplasm|plasma membrane|integral component of plasma membrane|cAMP biosynthetic process|G protein-coupled receptor signaling pathway|adenylate cyclase-modulating G protein-coupled receptor signaling pathway|adenylate cyclase-activating G protein-coupled receptor signaling pathway|adenylate cyclase-inhibiting…	oas00230,oas01522,oas04015,oas04020,oas04022,oas04024,oas04062,oas04072,oas04114,oas04211,oas04213,oas04261,oas04270,oas04371,oas04540,oas04611,oas04713,oas04714,oas04723,oas04724,oas04725,oas04727,oas04742,oas04750,oas04911,oas04912,oas04913,oas04914,oas04915,oas04916,oas04918,oas04921,oas04923,oas04925,oas04926,oas04927,oas04928,oas04934,oas04970,oas04971,oas04972,oas04976,oas05032,oas05163,oas…	Purine metabolism|Endocrine resistance|Rap1 signaling pathway|Calcium signaling pathway|cGMP-PKG signaling pathway|cAMP signaling pathway|Chemokine signaling pathway|Phospholipase D signaling pathway|Oocyte meiosis|Longevity regulating pathway|Longevity regulating pathway - multiple species|Adrenergic signaling in cardiomyocytes|Vascular smooth muscle contraction|Apelin signaling pathway|Gap junc…
ADIPOQ	41.4508	25.4884	57.4132	2.25244	1.17149	0.022366	0.0788034	Up	0.874216	1.08959	0.376626	0.198836	0.121237	0.642342	GeneID:101111848	adiponectin, C1Q and collagen domain containing	GO:0001934,GO:0005102,GO:0005179,GO:0005581,GO:0005615,GO:0005623,GO:0005783,GO:0006006,GO:0006635,GO:0009617,GO:0009749,GO:0009967,GO:0009986,GO:0010642,GO:0010739,GO:0010745,GO:0010804,GO:0010875,GO:0010906,GO:0019395,GO:0030336,GO:0030853,GO:0031953,GO:0032270,GO:0032720,GO:0032757,GO:0032869,GO:0033034,GO:0033691,GO:0034115,GO:0034383,GO:0034612,GO:0035690,GO:0042593,GO:0042802,GO:0042803,GO:…	positive regulation of protein phosphorylation|signaling receptor binding|hormone activity|collagen trimer|extracellular space|cell|endoplasmic reticulum|glucose metabolic process|fatty acid beta-oxidation|response to bacterium|response to glucose|positive regulation of signal transduction|cell surface|negative regulation of platelet-derived growth factor receptor signaling pathway|positive regul…	oas03320,oas04152,oas04211,oas04920,oas04930,oas04932	PPAR signaling pathway|AMPK signaling pathway|Longevity regulating pathway|Adipocytokine signaling pathway|Type II diabetes mellitus|Non-alcoholic fatty liver disease (NAFLD)
ADM	3058.15	4450.95	1665.35	0.374155	-1.41829	1.80542e-09	4.90351e-08	Down	22.3863	26.4833	26.5278	72.4741	72.7662	42.9566	GeneID:101103753	adrenomedullin	GO:0001570,GO:0001843,GO:0002031,GO:0003073,GO:0005179,GO:0005615,GO:0005737,GO:0007189,GO:0007507,GO:0008284,GO:0010460,GO:0031700,GO:0035809,GO:0043116,GO:0045766,GO:0045906,GO:0048589,GO:0060670,GO:0060712,GO:0097084,GO:0097647,GO:1990410,GO:2001214	vasculogenesis|neural tube closure|G protein-coupled receptor internalization|regulation of systemic arterial blood pressure|hormone activity|extracellular space|cytoplasm|adenylate cyclase-activating G protein-coupled receptor signaling pathway|heart development|positive regulation of cell proliferation|positive regulation of heart rate|adrenomedullin receptor binding|regulation of urine volume|…	oas04080,oas04270	Neuroactive ligand-receptor interaction|Vascular smooth muscle contraction
ADORA2A	15.1183	22.0314	8.20512	0.372834	-1.42339	0.0147297	0.0570428	Down	0.114869	0.0859016	0.0483499	0.266489	0.180542	0.175693	GeneID:101112926	adenosine A2a receptor	GO:0001609,GO:0001963,GO:0001975,GO:0005622,GO:0005887,GO:0007189,GO:0007626,GO:0019899,GO:0032230,GO:0042755,GO:0042802,GO:0046636,GO:0050728,GO:0060080,GO:0098794,GO:2001235	G protein-coupled adenosine receptor activity|synaptic transmission, dopaminergic|response to amphetamine|intracellular|integral component of plasma membrane|adenylate cyclase-activating G protein-coupled receptor signaling pathway|locomotory behavior|enzyme binding|positive regulation of synaptic transmission, GABAergic|eating behavior|identical protein binding|negative regulation of alpha-beta …	oas04015,oas04020,oas04024,oas04080,oas04270,oas05012,oas05034	Rap1 signaling pathway|Calcium signaling pathway|cAMP signaling pathway|Neuroactive ligand-receptor interaction|Vascular smooth muscle contraction|Parkinson disease|Alcoholism
AFF2	21.7839	32.1724	11.3953	0.354132	-1.49764	0.00176515	0.0101571	Down	0.0546359	0.0290545	0.0478335	0.116424	0.114496	0.115135	GeneID:101116804	AF4/FMR2 family member 2	GO:0002151,GO:0005634,GO:0006355,GO:0006397,GO:0007420,GO:0007611,GO:0008380,GO:0010468,GO:0010629,GO:0016607,GO:0035063,GO:0043484	G-quadruplex RNA binding|nucleus|regulation of transcription, DNA-templated|mRNA processing|brain development|learning or memory|RNA splicing|regulation of gene expression|negative regulation of gene expression|nuclear speck|nuclear speck organization|regulation of RNA splicing
AGER	48.4186	65.7729	31.0644	0.472057	-1.08297	0.00168406	0.00978526	Down	0.4026	0.373745	0.589016	1.04494	1.0328	0.622858	GeneID:101111586	advanced glycosylation end-product specific receptor	GO:0006954,GO:0016021	inflammatory response|integral component of membrane	oas04933	AGE-RAGE signaling pathway in diabetic complications
AGRP	31.5393	43.7356	19.343	0.442078	-1.17763	0.0258258	0.0880476	Down	0.500216	0.216853	0.615163	1.61456	0.865956	0.332645	GeneID:443269	agouti related neuropeptide	GO:0005184,GO:0005615,GO:0005796,GO:0007218,GO:0009755,GO:0031781,GO:0031782,GO:0060259	neuropeptide hormone activity|extracellular space|Golgi lumen|neuropeptide signaling pathway|hormone-mediated signaling pathway|type 3 melanocortin receptor binding|type 4 melanocortin receptor binding|regulation of feeding behavior	oas04920	Adipocytokine signaling pathway
AHR	884.253	1192.07	576.435	0.483548	-1.04827	0.00041314	0.003001	Down	2.85503	3.35783	3.84735	7.47308	7.76758	4.19819	GeneID:443467	aryl hydrocarbon receptor	GO:0004874,GO:0005634,GO:0005737,GO:0006805,GO:0007049,GO:0032922,GO:0034751,GO:0045892,GO:0045893,GO:0046983,GO:0070888	aryl hydrocarbon receptor activity|nucleus|cytoplasm|xenobiotic metabolic process|cell cycle|circadian regulation of gene expression|aryl hydrocarbon receptor complex|negative regulation of transcription, DNA-templated|positive regulation of transcription, DNA-templated|protein dimerization activity|E-box binding	oas04659,oas04934	Th17 cell differentiation|Cushing syndrome
AJM1	13.8021	20.6454	6.95872	0.337157	-1.56851	0.00984382	0.0414325	Down	0.0411745	0.0273699	0.0323509	0.0896256	0.124636	0.0653092	GeneID:106990977	apical junction component 1 homolog	GO:0005912,GO:0005929,GO:0016324,GO:0045216	adherens junction|cilium|apical plasma membrane|cell-cell junction organization
AKAP12	626.513	320.94	932.085	2.90396	1.53802	2.27492e-31	1.08127e-28	Up	2.77254	3.16815	3.11371	0.82536	0.903023	1.17587	GeneID:101105509	A-kinase anchoring protein 12
AKAP4	40.8464	25.1853	56.5075	2.2447	1.16652	0.00356731	0.0184901	Up	0.467541	0.235597	0.198063	0.134773	0.13696	0.102524	GeneID:101102535	A-kinase anchoring protein 4	GO:0005737,GO:0005929,GO:0007178,GO:0008104,GO:0010738,GO:0030018,GO:0030317,GO:0031514,GO:0035686,GO:0044458,GO:0045184,GO:0048471,GO:0051018,GO:0097228	cytoplasm|cilium|transmembrane receptor protein serine/threonine kinase signaling pathway|protein localization|regulation of protein kinase A signaling|Z disc|flagellated sperm motility|motile cilium|sperm fibrous sheath|motile cilium assembly|establishment of protein localization|perinuclear region of cytoplasm|protein kinase A binding|sperm principal piece
AKNA	333.296	449.105	217.487	0.484395	-1.04575	5.46317e-12	2.28395e-10	Down	1.217	1.2282	0.950668	2.4182	2.28191	1.8388	GeneID:101118854	AT-hook transcription factor	GO:0000978,GO:0000981,GO:0001077,GO:0001650,GO:0005654,GO:0005813,GO:0005829,GO:0016020,GO:0043231,GO:0045944	RNA polymerase II proximal promoter sequence-specific DNA binding|DNA-binding transcription factor activity, RNA polymerase II-specific|proximal promoter DNA-binding transcription activator activity, RNA polymerase II-specific|fibrillar center|nucleoplasm|centrosome|cytosol|membrane|intracellular membrane-bounded organelle|positive regulation of transcription by RNA polymerase II
ALDH1A3	144.259	88.0215	200.496	2.2777	1.18758	0.0343221	0.10978	Up	1.96017	1.50706	1.53481	0.397725	0.404178	1.23616	GeneID:101109831	aldehyde dehydrogenase 1 family member A3	GO:0001758,GO:0002072,GO:0002138,GO:0004029,GO:0004030,GO:0005634,GO:0005737,GO:0005829,GO:0005886,GO:0007626,GO:0021768,GO:0031076,GO:0042472,GO:0042572,GO:0042573,GO:0042574,GO:0042803,GO:0043065,GO:0048048,GO:0050885,GO:0051289,GO:0060013,GO:0060166,GO:0060324,GO:0070062,GO:0070324,GO:0070384,GO:0070403	retinal dehydrogenase activity|optic cup morphogenesis involved in camera-type eye development|retinoic acid biosynthetic process|aldehyde dehydrogenase (NAD) activity|aldehyde dehydrogenase [NAD(P)+] activity|nucleus|cytoplasm|cytosol|plasma membrane|locomotory behavior|nucleus accumbens development|embryonic camera-type eye development|inner ear morphogenesis|retinol metabolic process|retinoic …	oas00010,oas00340,oas00350,oas00360,oas00410,oas00980,oas00982,oas05204	Glycolysis / Gluconeogenesis|Histidine metabolism|Tyrosine metabolism|Phenylalanine metabolism|beta-Alanine metabolism|Metabolism of xenobiotics by cytochrome P450|Drug metabolism - cytochrome P450|Chemical carcinogenesis
ALOX12	574.209	880.18	268.238	0.304709	-1.71449	6.71907e-29	2.22808e-26	Down	2.07113	1.73904	2.36385	6.90852	7.21859	4.7869	GeneID:101113685	arachidonate 12-lipoxygenase, 12S type			oas00590,oas01523,oas04726,oas04750	Arachidonic acid metabolism|Antifolate resistance|Serotonergic synapse|Inflammatory mediator regulation of TRP channels
AMH	12.746	18.5448	6.94711	0.374971	-1.41515	0.0258969	0.0882509	Down	0.149952	0.104662	0.07574	0.324687	0.329955	0.168192	GeneID:101121773	anti-Mullerian hormone	GO:0001655,GO:0001880,GO:0005615,GO:0007506,GO:0008083,GO:0030154	urogenital system development|Mullerian duct regression|extracellular space|gonadal mesoderm development|growth factor activity|cell differentiation	oas04024,oas04060,oas04350,oas04390	cAMP signaling pathway|Cytokine-cytokine receptor interaction|TGF-beta signaling pathway|Hippo signaling pathway
AMHR2	48.1506	64.3505	31.9508	0.496561	-1.00996	0.00132186	0.00803494	Down	0.488368	0.501271	0.464324	1.03671	0.887979	0.805548	GeneID:101109693	anti-Mullerian hormone receptor type 2	GO:0004675,GO:0005524,GO:0016021,GO:0046872	transmembrane receptor protein serine/threonine kinase activity|ATP binding|integral component of membrane|metal ion binding	oas04060,oas04350	Cytokine-cytokine receptor interaction|TGF-beta signaling pathway
AMN	24.9158	35.3138	14.5177	0.411501	-1.28103	0.00499172	0.0241606	Down	0.373023	0.283381	0.161496	0.586082	0.576979	0.688271	GeneID:101122221	amnion associated transmembrane protein	GO:0005102,GO:0005615,GO:0005886,GO:0005905,GO:0006898,GO:0007275,GO:0007588,GO:0009235,GO:0010008,GO:0015889,GO:0016021,GO:0016324,GO:0030139,GO:0031526,GO:0032991,GO:0034384,GO:0043001,GO:0070062	signaling receptor binding|extracellular space|plasma membrane|clathrin-coated pit|receptor-mediated endocytosis|multicellular organism development|excretion|cobalamin metabolic process|endosome membrane|cobalamin transport|integral component of membrane|apical plasma membrane|endocytic vesicle|brush border membrane|protein-containing complex|high-density lipoprotein particle clearance|Golgi to p…
AMPD3	986.916	1387.1	586.732	0.422989	-1.24131	0.000830511	0.00542725	Down	3.24605	3.79899	4.10345	10.2264	9.90196	4.50294	GeneID:101103503	adenosine monophosphate deaminase 3	GO:0003876,GO:0005576,GO:0005829,GO:0006196,GO:0032264,GO:0034101,GO:0034774,GO:0043101,GO:0043312,GO:0046031,GO:0046034,GO:0046039,GO:0046872,GO:0097009,GO:1904813	AMP deaminase activity|extracellular region|cytosol|AMP catabolic process|IMP salvage|erythrocyte homeostasis|secretory granule lumen|purine-containing compound salvage|neutrophil degranulation|ADP metabolic process|ATP metabolic process|GTP metabolic process|metal ion binding|energy homeostasis|ficolin-1-rich granule lumen	oas00230	Purine metabolism
ANKRD33B	61.0925	84.2718	37.9131	0.450131	-1.15158	7.52213e-05	0.000683173	Down	0.168035	0.153288	0.108349	0.320712	0.273469	0.29529	GeneID:101105441	ankyrin repeat domain 33B	GO:0003677	DNA binding
ANKRD34A	24.5582	13.9946	35.1219	2.51012	1.32775	0.00558233	0.0264008	Up	0.209768	0.453176	0.309028	0.126168	0.146531	0.0891226	GeneID:101118396	ankyrin repeat domain 34A
ANXA9	13.4142	6.28972	20.5388	3.2651	1.70713	0.00703668	0.0317921	Up	0.407398	0.290152	0.249868	0.0750107	0.0609822	0.133525	GeneID:101109752	annexin A9	GO:0001786,GO:0005509,GO:0005544,GO:0015464	phosphatidylserine binding|calcium ion binding|calcium-dependent phospholipid binding|acetylcholine receptor activity
AOC2	336.448	479.261	193.636	0.40417	-1.30697	2.37353e-12	1.03499e-10	Down	1.89479	1.71894	1.15316	4.13957	4.10095	2.76349	GeneID:101106783	amine oxidase copper containing 2			oas00260,oas00350,oas00360,oas00410	Glycine, serine and threonine metabolism|Tyrosine metabolism|Phenylalanine metabolism|beta-Alanine metabolism
AQP3	2.45158	4.90315	0	0.03562	-4.81117	0.00755038	0.0334351	Down	0	0	0	0.0764135	0.124245	0.0151136	GeneID:443047	aquaporin 3 (Gill blood group)	GO:0002684,GO:0005634,GO:0005737,GO:0005911,GO:0015254,GO:0015840,GO:0016021,GO:0016323,GO:0032526,GO:0042476,GO:0070295,GO:0071456,GO:0090650	positive regulation of immune system process|nucleus|cytoplasm|cell-cell junction|glycerol channel activity|urea transport|integral component of membrane|basolateral plasma membrane|response to retinoic acid|odontogenesis|renal water absorption|cellular response to hypoxia|cellular response to oxygen-glucose deprivation	oas04962	Vasopressin-regulated water reabsorption
ARC	79.4822	111.244	47.7204	0.429167	-1.22039	1.16867e-05	0.000134823	Down	1.31225	1.19564	0.914222	2.98602	2.67886	1.7764	GeneID:101120169	activity regulated cytoskeleton associated protein	GO:0001669,GO:0003729,GO:0005737,GO:0005886,GO:0005938,GO:0006897,GO:0007010,GO:0007492,GO:0007612,GO:0007616,GO:0009952,GO:0015629,GO:0016477,GO:0022604,GO:0030054,GO:0031901,GO:0043025,GO:0043197,GO:0045121,GO:0048168,GO:0051028,GO:0051260,GO:0060291,GO:0060997,GO:0061001,GO:0098839,GO:0098845,GO:0098978,GO:0099149,GO:0110077,GO:1900271,GO:1900452,GO:1903561,GO:2000969	acrosomal vesicle|mRNA binding|cytoplasm|plasma membrane|cell cortex|endocytosis|cytoskeleton organization|endoderm development|learning|long-term memory|anterior/posterior pattern specification|actin cytoskeleton|cell migration|regulation of cell morphogenesis|cell junction|early endosome membrane|neuronal cell body|dendritic spine|membrane raft|regulation of neuronal synaptic plasticity|mRNA tr…	oas05031	Amphetamine addiction
ARHGAP11A	91.6891	26.5923	156.786	5.89773	2.56016	2.69476e-14	1.64912e-12	Up	0.666274	1.45576	0.755	0.167265	0.188191	0.10043	GeneID:101103069	Rho GTPase activating protein 11A	GO:0005096,GO:0005829,GO:0007165,GO:0051056	GTPase activator activity|cytosol|signal transduction|regulation of small GTPase mediated signal transduction
ARHGAP4	6.86476	11.1977	2.53183	0.226106	-2.14493	0.0261392	0.0888907	Down	0.0379314	0	0.0229907	0.117331	0.0953876	0.0386775	GeneID:101107503	Rho GTPase activating protein 4	GO:0005070,GO:0005096,GO:0005737,GO:0005794,GO:0005829,GO:0005874,GO:0007010,GO:0007266,GO:0010764,GO:0030336,GO:0030426,GO:0030517,GO:0042802,GO:0048365,GO:0051056	SH3/SH2 adaptor activity|GTPase activator activity|cytoplasm|Golgi apparatus|cytosol|microtubule|cytoskeleton organization|Rho protein signal transduction|negative regulation of fibroblast migration|negative regulation of cell migration|growth cone|negative regulation of axon extension|identical protein binding|Rac GTPase binding|regulation of small GTPase mediated signal transduction
ARHGAP45	203.151	310.044	96.2585	0.310438	-1.68762	2.31974e-11	8.77377e-10	Down	0.499625	0.408027	0.54317	1.78587	1.7949	0.786014	GeneID:101112901	Rho GTPase activating protein 45	GO:0005096,GO:0005576,GO:0005829,GO:0016020,GO:0032587,GO:0034774,GO:0035556,GO:0035578,GO:0043312,GO:0046872,GO:0051056	GTPase activator activity|extracellular region|cytosol|membrane|ruffle membrane|secretory granule lumen|intracellular signal transduction|azurophil granule lumen|neutrophil degranulation|metal ion binding|regulation of small GTPase mediated signal transduction
ARHGDIB	49.1418	31.8402	66.4434	2.08722	1.06158	0.00108844	0.00680406	Up	1.20085	1.37878	1.24985	0.581568	0.724456	0.408159	GeneID:101106069	Rho GDP dissociation inhibitor beta	GO:0003924,GO:0005094,GO:0005096,GO:0005829,GO:0007266,GO:0016020,GO:0035023,GO:0048365,GO:1901164,GO:2000249	GTPase activity|Rho GDP-dissociation inhibitor activity|GTPase activator activity|cytosol|Rho protein signal transduction|membrane|regulation of Rho protein signal transduction|Rac GTPase binding|negative regulation of trophoblast cell migration|regulation of actin cytoskeleton reorganization	oas04722,oas04962	Neurotrophin signaling pathway|Vasopressin-regulated water reabsorption
ASB9	79.8398	46.1843	113.495	2.45826	1.29764	2.34994e-06	3.24061e-05	Up	2.29813	1.83962	1.68394	0.800979	0.898763	0.511575	GeneID:101123093	ankyrin repeat and SOCS box containing 9	GO:0005739,GO:0016567,GO:0035556,GO:0045732	mitochondrion|protein ubiquitination|intracellular signal transduction|positive regulation of protein catabolic process
ASGR1	21.1973	36.3559	6.03875	0.165703	-2.59333	6.17488e-06	7.66966e-05	Down	0.0891086	0.0533097	0.198036	0.826903	0.429497	0.654203	GeneID:101116157	asialoglycoprotein receptor 1	GO:0006897,GO:0016021,GO:0030246,GO:0046872	endocytosis|integral component of membrane|carbohydrate binding|metal ion binding	oas04918	Thyroid hormone synthesis
ASPM	105.088	10.8422	199.334	18.3879	4.20069	8.50394e-24	1.7832e-21	Up	0.297841	0.853512	0.329305	0.0193448	0.029488	0.0263048	GeneID:443284	abnormal spindle microtubule assembly	GO:0005516,GO:0005634,GO:0005737,GO:0005819,GO:0007051,GO:0051301	calmodulin binding|nucleus|cytoplasm|spindle|spindle organization|cell division
ATCAY	19.936	9.79078	30.0812	3.07179	1.61908	0.00186045	0.0105901	Up	0.227902	0.12558	0.218107	0.0680221	0.0502733	0.0550386	GeneID:101116652	ATCAY kinesin light chain interacting caytaxin	GO:0004309,GO:0005737,GO:0006798,GO:0006915,GO:0019894,GO:0030054,GO:0030424,GO:0030425,GO:0031175,GO:0031966,GO:0032880,GO:0043005,GO:0045202,GO:0048311,GO:0050699,GO:2000212	exopolyphosphatase activity|cytoplasm|polyphosphate catabolic process|apoptotic process|kinesin binding|cell junction|axon|dendrite|neuron projection development|mitochondrial membrane|regulation of protein localization|neuron projection|synapse|mitochondrion distribution|WW domain binding|negative regulation of glutamate metabolic process
ATP13A4	7.56396	12.6051	2.52278	0.200518	-2.3182	0.0121448	0.0490575	Down	0.0125012	0.0311623	0.0063143	0.0708939	0.130989	0.0318679	GeneID:101107059	ATPase 13A4	GO:0005524,GO:0005886,GO:0006874,GO:0016021,GO:0019829,GO:0034220,GO:0046872	ATP binding|plasma membrane|cellular calcium ion homeostasis|integral component of membrane|cation-transporting ATPase activity|ion transmembrane transport|metal ion binding
ATP7B	87.7962	56.9725	118.62	2.08185	1.05786	0.000425384	0.00307116	Up	0.60994	0.41887	0.489659	0.133276	0.211623	0.333623	GeneID:443046	ATPase copper transporting beta	GO:0005507,GO:0005524,GO:0005770,GO:0006825,GO:0016021,GO:0032588,GO:0043682	copper ion binding|ATP binding|late endosome|copper ion transport|integral component of membrane|trans-Golgi network membrane|copper-transporting ATPase activity	oas01524	Platinum drug resistance
AURKA	34.1704	20.9607	47.38	2.26029	1.17651	0.0165816	0.0627821	Up	0.512751	1.06288	0.449821	0.139128	0.19794	0.49532	GeneID:100216431	aurora kinase A	GO:0000780,GO:0000922,GO:0004672,GO:0005524,GO:0005737,GO:0005813,GO:0005814,GO:0005829,GO:0005876,GO:0005929,GO:0007052,GO:0007057,GO:0007100,GO:0009611,GO:0009948,GO:0019901,GO:0031616,GO:0031625,GO:0031647,GO:0032091,GO:0032133,GO:0032436,GO:0032465,GO:0035174,GO:0042585,GO:0043066,GO:0043203,GO:0045120,GO:0046982,GO:0048471,GO:0051233,GO:0051301,GO:0051642,GO:0070938,GO:0071539,GO:0072687,GO:…	condensed nuclear chromosome, centromeric region|spindle pole|protein kinase activity|ATP binding|cytoplasm|centrosome|centriole|cytosol|spindle microtubule|cilium|mitotic spindle organization|spindle assembly involved in female meiosis I|mitotic centrosome separation|response to wounding|anterior/posterior axis specification|protein kinase binding|spindle pole centrosome|ubiquitin protein ligase…	oas04114,oas04914	Oocyte meiosis|Progesterone-mediated oocyte maturation
AURKB	35.2303	6.28683	64.1737	10.2011	3.35065	3.69739e-10	1.12893e-08	Up	1.01567	2.06678	1.13072	0.0427445	0.0868761	0.253629	GeneID:101106860	aurora kinase B	GO:0000122,GO:0000775,GO:0000780,GO:0002903,GO:0004674,GO:0005524,GO:0005634,GO:0005694,GO:0005737,GO:0005876,GO:0006468,GO:0007052,GO:0007094,GO:0009838,GO:0030496,GO:0031616,GO:0032133,GO:0032465,GO:0032466,GO:0032467,GO:0034501,GO:0034644,GO:0035174,GO:0036089,GO:0042585,GO:0043988,GO:0044878,GO:0046872,GO:0051233,GO:0051256,GO:0070938,GO:1990385	negative regulation of transcription by RNA polymerase II|chromosome, centromeric region|condensed nuclear chromosome, centromeric region|negative regulation of B cell apoptotic process|protein serine/threonine kinase activity|ATP binding|nucleus|chromosome|cytoplasm|spindle microtubule|protein phosphorylation|mitotic spindle organization|mitotic spindle assembly checkpoint|abscission|midbody|spi…
AURKC	38.8601	59.111	18.6092	0.315212	-1.6656	3.40211e-05	0.00034356	Down	0.403495	0.472291	0.159498	1.17575	1.04777	0.840753	GeneID:101104774	aurora kinase C	GO:0000780,GO:0000793,GO:0004672,GO:0004712,GO:0005524,GO:0005737,GO:0005819,GO:0005876,GO:0006468,GO:0007052,GO:0007283,GO:0008608,GO:0016570,GO:0030496,GO:0031616,GO:0032133,GO:0032465,GO:0032467,GO:0035174,GO:0048599,GO:0051233,GO:0051256,GO:0051301,GO:0051321	condensed nuclear chromosome, centromeric region|condensed chromosome|protein kinase activity|protein serine/threonine/tyrosine kinase activity|ATP binding|cytoplasm|spindle|spindle microtubule|protein phosphorylation|mitotic spindle organization|spermatogenesis|attachment of spindle microtubules to kinetochore|histone modification|midbody|spindle pole centrosome|chromosome passenger complex|regu…
BCAN	10.235	5.5974	14.8725	2.65743	1.41003	0.0458126	0.136177	Up	0.0805092	0.176605	0.121994	0.0498069	0.050615	0.0328372	GeneID:101105963	brevican	GO:0005540,GO:0007155,GO:0007417,GO:0030246,GO:0031012	hyaluronic acid binding|cell adhesion|central nervous system development|carbohydrate binding|extracellular matrix
BCHE	472.62	304.676	640.564	2.10252	1.07212	1.75556e-15	1.28372e-13	Up	6.62854	8.21185	7.64785	3.44014	3.75147	2.79173	GeneID:101102112	butyrylcholinesterase	GO:0003990,GO:0004104,GO:0005576,GO:0005641,GO:0005783,GO:0042802	acetylcholinesterase activity|cholinesterase activity|extracellular region|nuclear envelope lumen|endoplasmic reticulum|identical protein binding
BEND7	78.5368	107.37	49.7035	0.462832	-1.11144	9.58238e-06	0.000113823	Down	0.141637	0.155936	0.166927	0.340758	0.315368	0.27982	GeneID:101115641	BEN domain containing 7	GO:0070062	extracellular exosome
BEST2	12.6536	23.0943	2.2128	0.0958794	-3.38263	5.76234e-05	0.000538435	Down	0.0416912	0.0277134	0.0280773	0.544502	0.305791	0.0991932	GeneID:101123465	bestrophin 2	GO:0005254,GO:0005886,GO:0005929,GO:0006821,GO:0007608,GO:0034707,GO:0051899,GO:1902476	chloride channel activity|plasma membrane|cilium|chloride transport|sensory perception of smell|chloride channel complex|membrane depolarization|chloride transmembrane transport	oas04970	Salivary secretion
BHLHE41	353.455	233.003	473.908	2.03411	1.02439	4.58041e-09	1.13586e-07	Up	3.34292	4.67271	3.70836	1.96501	2.11147	1.30613	GeneID:101112806	basic helix-loop-helix family member e41	GO:0000122,GO:0000977,GO:0000978,GO:0000980,GO:0000981,GO:0001078,GO:0001102,GO:0001227,GO:0001756,GO:0003714,GO:0005634,GO:0007219,GO:0008134,GO:0008283,GO:0009887,GO:0010832,GO:0010944,GO:0030154,GO:0032922,GO:0042803,GO:0042826,GO:0043425,GO:0043426,GO:0043565,GO:0045892,GO:0046982,GO:0050767,GO:0070888,GO:1990837	negative regulation of transcription by RNA polymerase II|RNA polymerase II regulatory region sequence-specific DNA binding|RNA polymerase II proximal promoter sequence-specific DNA binding|RNA polymerase II distal enhancer sequence-specific DNA binding|DNA-binding transcription factor activity, RNA polymerase II-specific|proximal promoter DNA-binding transcription repressor activity, RNA polymer…	oas04710	Circadian rhythm
BIRC5	123.832	37.3825	210.282	5.62453	2.49173	3.69547e-06	4.8521e-05	Up	1.53624	3.42579	1.95035	0.310375	0.228401	0.603298	GeneID:101123390	baculoviral IAP repeat containing 5	GO:0000086,GO:0000226,GO:0000281,GO:0000775,GO:0000777,GO:0005634,GO:0005737,GO:0005814,GO:0005829,GO:0005876,GO:0005881,GO:0006468,GO:0007059,GO:0007094,GO:0008017,GO:0008270,GO:0015631,GO:0030496,GO:0031021,GO:0031503,GO:0031536,GO:0032133,GO:0042803,GO:0043027,GO:0043066,GO:0043154,GO:0043524,GO:0045892,GO:0045931,GO:0048037,GO:0051301,GO:0051303,GO:0061178,GO:0061469	G2/M transition of mitotic cell cycle|microtubule cytoskeleton organization|mitotic cytokinesis|chromosome, centromeric region|condensed chromosome kinetochore|nucleus|cytoplasm|centriole|cytosol|spindle microtubule|cytoplasmic microtubule|protein phosphorylation|chromosome segregation|mitotic spindle assembly checkpoint|microtubule binding|zinc ion binding|tubulin binding|midbody|interphase micr…	oas01524,oas04210,oas04215,oas04390,oas05161,oas05200,oas05210	Platinum drug resistance|Apoptosis|Apoptosis - multiple species|Hippo signaling pathway|Hepatitis B|Pathways in cancer|Colorectal cancer
BMP6	385.496	543.493	227.499	0.418652	-1.25618	3.1336e-10	9.75591e-09	Down	3.1612	2.24999	1.92015	4.9049	4.17503	7.20339	GeneID:443174	bone morphogenetic protein 6	GO:0000122,GO:0001503,GO:0001649,GO:0001654,GO:0001822,GO:0001938,GO:0001958,GO:0003323,GO:0005125,GO:0005160,GO:0005615,GO:0005737,GO:0006879,GO:0006954,GO:0006955,GO:0008083,GO:0010039,GO:0010862,GO:0014823,GO:0030501,GO:0030509,GO:0030539,GO:0031666,GO:0031982,GO:0032026,GO:0032332,GO:0032349,GO:0032526,GO:0042981,GO:0043408,GO:0045595,GO:0045603,GO:0045666,GO:0045669,GO:0045944,GO:0046982,GO:…	negative regulation of transcription by RNA polymerase II|ossification|osteoblast differentiation|eye development|kidney development|positive regulation of endothelial cell proliferation|endochondral ossification|type B pancreatic cell development|cytokine activity|transforming growth factor beta receptor binding|extracellular space|cytoplasm|cellular iron ion homeostasis|inflammatory response|im…	oas04060,oas04350,oas04390,oas04913	Cytokine-cytokine receptor interaction|TGF-beta signaling pathway|Hippo signaling pathway|Ovarian steroidogenesis
BRCA1	184.816	103.862	265.77	2.55889	1.35552	6.14624e-10	1.81824e-08	Up	0.744811	1.21276	0.918065	0.257161	0.39379	0.39715	GeneID:101108584	BRCA1 DNA repair associated	GO:0000724,GO:0003677,GO:0003713,GO:0004842,GO:0005634,GO:0005694,GO:0005737,GO:0005886,GO:0006357,GO:0006633,GO:0007049,GO:0008270,GO:0009048,GO:0031436,GO:0035066,GO:0035067,GO:0043009,GO:0045717,GO:0045893,GO:0045944,GO:0051865,GO:0070063,GO:0070531,GO:0071158,GO:0085020	double-strand break repair via homologous recombination|DNA binding|transcription coactivator activity|ubiquitin-protein transferase activity|nucleus|chromosome|cytoplasm|plasma membrane|regulation of transcription by RNA polymerase II|fatty acid biosynthetic process|cell cycle|zinc ion binding|dosage compensation by inactivation of X chromosome|BRCA1-BARD1 complex|positive regulation of histone …	oas01524,oas03440,oas03460,oas04120,oas04151,oas05206,oas05224	Platinum drug resistance|Homologous recombination|Fanconi anemia pathway|Ubiquitin mediated proteolysis|PI3K-Akt signaling pathway|MicroRNAs in cancer|Breast cancer
BUB1	55.4773	10.4835	100.471	9.58144	3.26024	5.28508e-12	2.21647e-10	Up	0.528516	1.40004	0.581713	0.0325339	0.0743889	0.136739	GeneID:101117404	BUB1 mitotic checkpoint serine/threonine kinase			oas04110,oas04114,oas04914	Cell cycle|Oocyte meiosis|Progesterone-mediated oocyte maturation
BUB1B	113.63	18.8818	208.378	11.0357	3.46411	8.07401e-23	1.43909e-20	Up	0.995325	2.46297	1.33573	0.194765	0.0989624	0.111121	GeneID:101108313	BUB1 mitotic checkpoint serine/threonine kinase B			oas04110,oas05166	Cell cycle|Human T-cell leukemia virus 1 infection
C12H1orf115	917.117	606.016	1228.22	2.02671	1.01914	6.31178e-30	2.57142e-27	Up	12.4375	12.4298	12.1035	5.42747	5.69474	5.8809	GeneID:101105767	chromosome 12 C1orf115 homolog	GO:0016021	integral component of membrane
C19H3orf49	65.6417	43.7187	87.5647	2.0034	1.00245	0.000401827	0.00293883	Up	1.03199	1.04978	0.810837	0.354689	0.524281	0.467685	GeneID:101119763	chromosome 19 C3orf49 homolog
C19H3orf86	9.43993	15.3962	3.4837	0.226196	-2.14436	0.00679808	0.0309792	Down	0.059881	0.149267	0.120982	0.648292	0.501951	0.213706	GeneID:101119258	chromosome 19 C3orf86 homolog
C1R	11250.8	15531.4	6970.22	0.448778	-1.15593	8.73553e-35	5.53455e-32	Down	93.1675	73.7897	95.0397	170.313	176.408	197.308	GeneID:101107430	complement C1r	GO:0004252,GO:0005509,GO:0006958,GO:0045087	serine-type endopeptidase activity|calcium ion binding|complement activation, classical pathway|innate immune response	oas04145,oas04610,oas05133,oas05150,oas05322	Phagosome|Complement and coagulation cascades|Pertussis|Staphylococcus aureus infection|Systemic lupus erythematosus
C5AR1	5.03976	9.45115	0.628364	0.0668268	-3.90343	0.00587245	0.0274812	Down	0.0181702	0	0	0.131145	0.104714	0.0185277	GeneID:101118296	complement C5a receptor 1	GO:0002430,GO:0004878,GO:0004930,GO:0006935,GO:0006954,GO:0007200,GO:0007204,GO:0016021,GO:0016323,GO:0031410,GO:0042789,GO:0045177,GO:0050679,GO:0070374	complement receptor mediated signaling pathway|complement component C5a receptor activity|G protein-coupled receptor activity|chemotaxis|inflammatory response|phospholipase C-activating G protein-coupled receptor signaling pathway|positive regulation of cytosolic calcium ion concentration|integral component of membrane|basolateral plasma membrane|cytoplasmic vesicle|mRNA transcription by RNA poly…	oas04080,oas04610,oas05150	Neuroactive ligand-receptor interaction|Complement and coagulation cascades|Staphylococcus aureus infection
C5AR2	134.375	185.769	82.9803	0.44659	-1.16298	2.53132e-07	4.47262e-06	Down	0.65479	0.825176	0.909509	1.81913	1.94394	1.23334	GeneID:101118552	complement component 5a receptor 2	GO:0002430,GO:0004878,GO:0004930,GO:0005886,GO:0006935,GO:0006954,GO:0007200,GO:0007204,GO:0009925,GO:0016021,GO:0030449,GO:0032720,GO:0045177,GO:0050679,GO:0070374,GO:0090024,GO:1900165,GO:2000482	complement receptor mediated signaling pathway|complement component C5a receptor activity|G protein-coupled receptor activity|plasma membrane|chemotaxis|inflammatory response|phospholipase C-activating G protein-coupled receptor signaling pathway|positive regulation of cytosolic calcium ion concentration|basal plasma membrane|integral component of membrane|regulation of complement activation|nega…
CA11	65.5292	26.2297	104.829	3.99602	1.99856	4.61288e-11	1.65264e-09	Up	1.82757	2.36893	2.54363	0.418748	0.595759	0.559055	GeneID:443426	carbonic anhydrase 11	GO:0005576,GO:0008270	extracellular region|zinc ion binding
CA2	5.02238	9.10092	0.943827	0.104118	-3.2637	0.00752384	0.0333486	Down	0.0157766	0.0314615	0	0.0976017	0.231432	0.0965217	GeneID:101113341	carbonic anhydrase 2	GO:0004089,GO:0005737,GO:0005886,GO:0008270,GO:0038166,GO:0044070,GO:0051453,GO:2001150	carbonate dehydratase activity|cytoplasm|plasma membrane|zinc ion binding|angiotensin-activated signaling pathway|regulation of anion transport|regulation of intracellular pH|positive regulation of dipeptide transmembrane transport	oas00910,oas04964,oas04966,oas04971,oas04972,oas04976	Nitrogen metabolism|Proximal tubule bicarbonate reclamation|Collecting duct acid secretion|Gastric acid secretion|Pancreatic secretion|Bile secretion
CABP1	6.15731	9.79311	2.5215	0.257986	-1.95463	0.0347104	0.110699	Down	0.0148057	0.011072	0.00373914	0.0267153	0.0426624	0.0377425	GeneID:101112516	calcium binding protein 1	GO:0005509,GO:0005794,GO:0005856,GO:0007601,GO:0008139,GO:0014069,GO:0030054,GO:0042308,GO:0045211,GO:0048306,GO:0048471,GO:0050896	calcium ion binding|Golgi apparatus|cytoskeleton|visual perception|nuclear localization sequence binding|postsynaptic density|cell junction|negative regulation of protein import into nucleus|postsynaptic membrane|calcium-dependent protein binding|perinuclear region of cytoplasm|response to stimulus
CACNA1H	29.8747	19.2316	40.5178	2.10655	1.07488	0.010908	0.0450962	Up	0.089494	0.0914103	0.0992259	0.0225062	0.0480299	0.0534173	GeneID:101119120	calcium voltage-gated channel subunit alpha1 H	GO:0005244,GO:0005886,GO:0005887,GO:0005891,GO:0006936,GO:0007517,GO:0007520,GO:0008016,GO:0008332,GO:0016021,GO:0019228,GO:0032342,GO:0032870,GO:0034651,GO:0034765,GO:0035865,GO:0042391,GO:0045956,GO:0046872,GO:0070509,GO:0086010,GO:0097110,GO:0098662,GO:2000344	voltage-gated ion channel activity|plasma membrane|integral component of plasma membrane|voltage-gated calcium channel complex|muscle contraction|muscle organ development|myoblast fusion|regulation of heart contraction|low voltage-gated calcium channel activity|integral component of membrane|neuronal action potential|aldosterone biosynthetic process|cellular response to hormone stimulus|cortisol …	oas04010,oas04020,oas04713,oas04925,oas04927,oas04934	MAPK signaling pathway|Calcium signaling pathway|Circadian entrainment|Aldosterone synthesis and secretion|Cortisol synthesis and secretion|Cushing syndrome
CADM4	11.8958	20.6111	3.18049	0.153877	-2.70015	0.000710898	0.00474564	Down	0.0126569	0.0378602	0.0767148	0.313206	0.0928338	0.361363	GeneID:101107547	cell adhesion molecule 4	GO:0007155,GO:0016021	cell adhesion|integral component of membrane
CAMK2N1	7.41566	12.9401	1.89122	0.14647	-2.77132	0.00428609	0.0214064	Down	0.0842076	0	0.0170131	0.277839	0.194114	0.171728	GeneID:101102884	calcium/calmodulin dependent protein kinase II inhibitor 1	GO:0005622,GO:0008285,GO:0008427,GO:0010628,GO:0014069,GO:0019901,GO:0030054,GO:0043005,GO:0045211,GO:0045786,GO:0045861,GO:0070373,GO:1904030	intracellular|negative regulation of cell proliferation|calcium-dependent protein kinase inhibitor activity|positive regulation of gene expression|postsynaptic density|protein kinase binding|cell junction|neuron projection|postsynaptic membrane|negative regulation of cell cycle|negative regulation of proteolysis|negative regulation of ERK1 and ERK2 cascade|negative regulation of cyclin-dependent …
CAPNS2	12.6202	19.2554	5.98491	0.311341	-1.68343	0.0271154	0.0912528	Down	0.276847	0.115018	0.0466112	0.570903	0.628513	0.117622	GeneID:101115561	calpain small subunit 2
CASQ2	37.5308	20.6241	54.4375	2.6389	1.39994	0.000246603	0.0019278	Up	0.65924	0.492993	0.624334	0.148691	0.194276	0.283588	GeneID:101105292	calsequestrin 2	GO:0005509,GO:0010880,GO:0014809,GO:0016529,GO:0030018,GO:0033018,GO:0060315	calcium ion binding|regulation of release of sequestered calcium ion into cytosol by sarcoplasmic reticulum|regulation of skeletal muscle contraction by regulation of release of sequestered calcium ion|sarcoplasmic reticulum|Z disc|sarcoplasmic reticulum lumen|negative regulation of ryanodine-sensitive calcium-release channel activity
CCDC160	10.368	4.88667	15.8493	3.23998	1.69599	0.0335898	0.108019	Up	0.238081	0.388455	0.459149	0.111582	0	0.198625	GeneID:101108991	coiled-coil domain containing 160
CCDC163	44.1274	59.4602	28.7945	0.484276	-1.0461	0.00322301	0.0169583	Down	0.676331	0.390422	0.557365	1.3213	1.00705	0.798525	GeneID:101111334	coiled-coil domain containing 163	GO:0016021	integral component of membrane
CCDC3	45.7886	74.1925	17.3847	0.234452	-2.09264	5.15193e-08	1.03906e-06	Down	0.209863	0.209253	0.159001	0.757351	1.0665	0.481481	GeneID:101109471	coiled-coil domain containing 3	GO:0005576,GO:0005783,GO:0010804,GO:0045600,GO:0046889	extracellular region|endoplasmic reticulum|negative regulation of tumor necrosis factor-mediated signaling pathway|positive regulation of fat cell differentiation|positive regulation of lipid biosynthetic process
CCDC33	76.8224	127.733	25.912	0.202987	-2.30054	2.0194e-12	8.85987e-11	Down	0.314592	0.346127	0.230129	1.46526	1.81866	0.818543	GeneID:101120277	coiled-coil domain containing 33
CCIN	54.036	74.1648	33.9072	0.457005	-1.12972	0.000978302	0.00623307	Down	0.316087	0.173343	0.359221	0.684414	0.637559	0.410939	GeneID:101110996	calicin	GO:0005856,GO:0007275,GO:0007283,GO:0030154,GO:0033150	cytoskeleton|multicellular organism development|spermatogenesis|cell differentiation|cytoskeletal calyx
CCL20	107.087	198.695	15.4783	0.0779875	-3.68061	1.46576e-33	8.03859e-31	Down	0.380351	0.729319	0.325115	6.09377	6.4992	4.59434	GeneID:101104302	C-C motif chemokine ligand 20	GO:0002548,GO:0005615,GO:0005622,GO:0006935,GO:0006954,GO:0007186,GO:0008009,GO:0030593,GO:0031731,GO:0035584,GO:0043547,GO:0048020,GO:0048247,GO:0060326,GO:0070098,GO:0070374,GO:0071346,GO:0071347,GO:0071356,GO:0072678,GO:0072679,GO:2000406	monocyte chemotaxis|extracellular space|intracellular|chemotaxis|inflammatory response|G protein-coupled receptor signaling pathway|chemokine activity|neutrophil chemotaxis|CCR6 chemokine receptor binding|calcium-mediated signaling using intracellular calcium source|positive regulation of GTPase activity|CCR chemokine receptor binding|lymphocyte chemotaxis|cell chemotaxis|chemokine-mediated signa…	oas04060,oas04062,oas04657,oas04668,oas05323	Cytokine-cytokine receptor interaction|Chemokine signaling pathway|IL-17 signaling pathway|TNF signaling pathway|Rheumatoid arthritis
CCNA2	81.5134	38.4368	124.59	3.24079	1.69634	7.1751e-08	1.4015e-06	Up	1.12664	1.77266	1.17989	0.309066	0.270759	0.590213	GeneID:100144758	cyclin A2	GO:0000079,GO:0000086,GO:0000278,GO:0000307,GO:0005634,GO:0005737,GO:0006275,GO:0006468,GO:0007088,GO:0008284,GO:0016538,GO:0019901,GO:0044843,GO:0045787,GO:0051301,GO:0097124	regulation of cyclin-dependent protein serine/threonine kinase activity|G2/M transition of mitotic cell cycle|mitotic cell cycle|cyclin-dependent protein kinase holoenzyme complex|nucleus|cytoplasm|regulation of DNA replication|protein phosphorylation|regulation of mitotic nuclear division|positive regulation of cell proliferation|cyclin-dependent protein serine/threonine kinase regulator activit…	oas04110,oas04152,oas04218,oas04914,oas05161,oas05165,oas05166,oas05169,oas05203	Cell cycle|AMPK signaling pathway|Cellular senescence|Progesterone-mediated oocyte maturation|Hepatitis B|Human papillomavirus infection|Human T-cell leukemia virus 1 infection|Epstein-Barr virus infection|Viral carcinogenesis
CCNB1	175.821	91.6258	260.017	2.83794	1.50484	8.14223e-13	3.90909e-11	Up	2.26829	3.72761	2.65208	0.898701	0.990306	0.953004	GeneID:101120694	cyclin B1	GO:0000079,GO:0000278,GO:0000307,GO:0000922,GO:0000942,GO:0001701,GO:0005113,GO:0005634,GO:0005737,GO:0005759,GO:0005813,GO:0005829,GO:0007052,GO:0007080,GO:0007088,GO:0008284,GO:0010971,GO:0016020,GO:0016301,GO:0016538,GO:0019901,GO:0044389,GO:0045787,GO:0048146,GO:0051301,GO:0051987,GO:0061575,GO:0090266,GO:0097125,GO:1905448,GO:2000775	regulation of cyclin-dependent protein serine/threonine kinase activity|mitotic cell cycle|cyclin-dependent protein kinase holoenzyme complex|spindle pole|condensed nuclear chromosome outer kinetochore|in utero embryonic development|patched binding|nucleus|cytoplasm|mitochondrial matrix|centrosome|cytosol|mitotic spindle organization|mitotic metaphase plate congression|regulation of mitotic nucle…	oas04068,oas04110,oas04114,oas04115,oas04218,oas04914,oas05170	FoxO signaling pathway|Cell cycle|Oocyte meiosis|p53 signaling pathway|Cellular senescence|Progesterone-mediated oocyte maturation|Human immunodeficiency virus 1 infection
CCNB3	72.2335	42.2925	102.175	2.41559	1.27237	4.09848e-05	0.000403036	Up	0.489372	0.90178	0.613254	0.249097	0.194722	0.328455	GeneID:101102288	cyclin B3	GO:0000079,GO:0000278,GO:0000307,GO:0005634,GO:0005737,GO:0005813,GO:0006468,GO:0007088,GO:0008284,GO:0010389,GO:0016538,GO:0019901,GO:0045787,GO:0051301,GO:0051321	regulation of cyclin-dependent protein serine/threonine kinase activity|mitotic cell cycle|cyclin-dependent protein kinase holoenzyme complex|nucleus|cytoplasm|centrosome|protein phosphorylation|regulation of mitotic nuclear division|positive regulation of cell proliferation|regulation of G2/M transition of mitotic cell cycle|cyclin-dependent protein serine/threonine kinase regulator activity|pro…	oas04068,oas04110,oas04218,oas04914,oas05170	FoxO signaling pathway|Cell cycle|Cellular senescence|Progesterone-mediated oocyte maturation|Human immunodeficiency virus 1 infection
CCNF	17.6309	5.2355	30.0263	5.73065	2.5187	0.000231399	0.00182394	Up	0.115745	0.274781	0.133627	0.0170489	0.00577516	0.0618207	GeneID:101116197	cyclin F	GO:0000079,GO:0000278,GO:0000307,GO:0000320,GO:0001890,GO:0005634,GO:0005737,GO:0005813,GO:0005814,GO:0006468,GO:0007088,GO:0008284,GO:0010826,GO:0016538,GO:0016567,GO:0019005,GO:0019901,GO:0030054,GO:0031146,GO:0045787,GO:0051301	regulation of cyclin-dependent protein serine/threonine kinase activity|mitotic cell cycle|cyclin-dependent protein kinase holoenzyme complex|re-entry into mitotic cell cycle|placenta development|nucleus|cytoplasm|centrosome|centriole|protein phosphorylation|regulation of mitotic nuclear division|positive regulation of cell proliferation|negative regulation of centrosome duplication|cyclin-depend…
CCR7	148.229	213.777	82.682	0.386688	-1.37076	1.9203e-07	3.47041e-06	Down	0.430664	0.518874	0.616324	1.65902	1.39764	0.725795	GeneID:101109462	C-C motif chemokine receptor 7	GO:0005622,GO:0006935,GO:0006954,GO:0006955,GO:0007204,GO:0009897,GO:0016021,GO:0016493,GO:0019722,GO:0019956,GO:0019957,GO:0035757,GO:0035758,GO:0038117,GO:0060326	intracellular|chemotaxis|inflammatory response|immune response|positive regulation of cytosolic calcium ion concentration|external side of plasma membrane|integral component of membrane|C-C chemokine receptor activity|calcium-mediated signaling|chemokine binding|C-C chemokine binding|chemokine (C-C motif) ligand 19 binding|chemokine (C-C motif) ligand 21 binding|C-C motif chemokine 19 receptor ac…	oas04060,oas04062	Cytokine-cytokine receptor interaction|Chemokine signaling pathway
CD24	5.34991	9.44181	1.25801	0.133727	-2.90264	0.0104874	0.043623	Down	0.0289591	0.0288749	0	0.223944	0.0910309	0.0885863	GeneID:101119731	CD24 molecule			oas04640	Hematopoietic cell lineage
CD68	2695.63	3760.86	1630.41	0.433522	-1.20582	1.39452e-08	3.16632e-07	Down	28.1872	25.9006	28.0726	66.8521	67.67	42.3988	GeneID:101102500	CD68 molecule	GO:0005886,GO:0010008,GO:0016020,GO:0016021,GO:0035577,GO:0043312	plasma membrane|endosome membrane|membrane|integral component of membrane|azurophil granule membrane|neutrophil degranulation	oas04142	Lysosome
CD8B	18.9757	7.33185	30.6196	4.17471	2.06168	0.00109329	0.00681645	Up	0.680957	0.834172	0.373428	0.0601818	0.0611583	0.29758	GeneID:101103712	CD8b molecule	GO:0002250,GO:0005886,GO:0016021	adaptive immune response|plasma membrane|integral component of membrane	oas04514,oas04612,oas04640,oas04660,oas05340	Cell adhesion molecules (CAMs)|Antigen processing and presentation|Hematopoietic cell lineage|T cell receptor signaling pathway|Primary immunodeficiency
CDC20	97.7615	24.1073	171.416	7.1097	2.82979	1.48051e-05	0.000165963	Up	1.85448	4.35742	2.54128	0.166271	0.304144	0.674169	GeneID:101110548	cell division cycle 20	GO:0000922,GO:0005654,GO:0005680,GO:0005815,GO:0005829,GO:0007064,GO:0008022,GO:0010997,GO:0016567,GO:0019899,GO:0031145,GO:0031915,GO:0040020,GO:0051301,GO:0090129,GO:0090307,GO:0097027,GO:1904146,GO:1904668	spindle pole|nucleoplasm|anaphase-promoting complex|microtubule organizing center|cytosol|mitotic sister chromatid cohesion|protein C-terminus binding|anaphase-promoting complex binding|protein ubiquitination|enzyme binding|anaphase-promoting complex-dependent catabolic process|positive regulation of synaptic plasticity|regulation of meiotic nuclear division|cell division|positive regulation of s…	oas04110,oas04114,oas04120,oas05166,oas05203	Cell cycle|Oocyte meiosis|Ubiquitin mediated proteolysis|Human T-cell leukemia virus 1 infection|Viral carcinogenesis
CDC25C	11.7775	4.89903	18.6559	3.80964	1.92965	0.00768527	0.0339375	Up	0.0652298	0.214633	0.105431	0.0336286	0.0410091	0.0199539	GeneID:101110327	cell division cycle 25C	GO:0000086,GO:0004725,GO:0005634,GO:0005737,GO:0010971,GO:0016607,GO:0019901,GO:0045931,GO:0050699,GO:0051301,GO:0110032	G2/M transition of mitotic cell cycle|protein tyrosine phosphatase activity|nucleus|cytoplasm|positive regulation of G2/M transition of mitotic cell cycle|nuclear speck|protein kinase binding|positive regulation of mitotic cell cycle|WW domain binding|cell division|positive regulation of G2/MI transition of meiotic cell cycle	oas04110,oas04114,oas04914,oas05170,oas05206	Cell cycle|Oocyte meiosis|Progesterone-mediated oocyte maturation|Human immunodeficiency virus 1 infection|MicroRNAs in cancer
CDCA2	24.2263	10.1447	38.3079	3.77631	1.91698	0.000118161	0.00101866	Up	0.199367	0.429381	0.338349	0.0822254	0.0919154	0.0650524	GeneID:101111159	cell division cycle associated 2	GO:0005634,GO:0007049,GO:0035307,GO:0051301	nucleus|cell cycle|positive regulation of protein dephosphorylation|cell division
CDCA3	53.4468	19.9154	86.9782	4.36601	2.12632	5.67763e-08	1.12754e-06	Up	1.56006	3.01677	1.93412	0.316835	0.321975	0.747168	GeneID:101110222	cell division cycle associated 3	GO:0005829,GO:0005913,GO:0007049,GO:0016567,GO:0051301	cytosol|cell-cell adherens junction|cell cycle|protein ubiquitination|cell division
CDCA5	9.31458	2.79444	15.8347	5.66228	2.50138	0.0043548	0.0216633	Up	0.0842735	0.252085	0.191547	0.054308	0	0.0322242	GeneID:101120206	cell division cycle associated 5	GO:0000278,GO:0000775,GO:0000790,GO:0003682,GO:0005634,GO:0005654,GO:0005694,GO:0005737,GO:0005829,GO:0006302,GO:0007064,GO:0007076,GO:0007080,GO:0008278,GO:0031536,GO:0044877,GO:0051301,GO:0071922	mitotic cell cycle|chromosome, centromeric region|nuclear chromatin|chromatin binding|nucleus|nucleoplasm|chromosome|cytoplasm|cytosol|double-strand break repair|mitotic sister chromatid cohesion|mitotic chromosome condensation|mitotic metaphase plate congression|cohesin complex|positive regulation of exit from mitosis|protein-containing complex binding|cell division|regulation of cohesin loading	oas05206	MicroRNAs in cancer
CDCA7	20.8682	12.5694	29.167	2.31867	1.21329	0.0380445	0.118886	Up	0.247215	0.266216	0.399574	0.0611757	0.0518069	0.252078	GeneID:101111162	cell division cycle associated 7	GO:0005634,GO:0005654,GO:0005829,GO:0006355,GO:0006915,GO:0042127	nucleus|nucleoplasm|cytosol|regulation of transcription, DNA-templated|apoptotic process|regulation of cell proliferation
CDCA8	26.2242	13.2597	39.1888	2.95424	1.56279	0.016081	0.0612936	Up	0.36316	0.760418	0.379088	0.0624078	0.0253681	0.382647	GeneID:101115324	cell division cycle associated 8	GO:0000775,GO:0005730,GO:0005737,GO:0005819,GO:0007049,GO:0032133,GO:0032991,GO:0051301	chromosome, centromeric region|nucleolus|cytoplasm|spindle|cell cycle|chromosome passenger complex|protein-containing complex|cell division
CDH6	390.521	199.095	581.946	2.92285	1.54738	0.00557531	0.0263764	Up	2.19033	1.66287	2.28327	0.405004	0.373208	1.17102	GeneID:101116091	cadherin 6	GO:0005509,GO:0005886,GO:0005913,GO:0007043,GO:0007156,GO:0007219,GO:0008092,GO:0009986,GO:0016021,GO:0016339,GO:0016342,GO:0034332,GO:0042803,GO:0044331,GO:0045296,GO:0098609	calcium ion binding|plasma membrane|cell-cell adherens junction|cell-cell junction assembly|homophilic cell adhesion via plasma membrane adhesion molecules|Notch signaling pathway|cytoskeletal protein binding|cell surface|integral component of membrane|calcium-dependent cell-cell adhesion via plasma membrane cell adhesion molecules|catenin complex|adherens junction organization|protein homodimeri…
CDH8	12.258	18.1766	6.3394	0.348508	-1.52074	0.0304724	0.100047	Down	0.0578622	0.0057694	0.0526065	0.119321	0.0727543	0.118001	GeneID:101106707	cadherin 8	GO:0005509,GO:0005886,GO:0005913,GO:0007043,GO:0007155,GO:0007156,GO:0008092,GO:0009409,GO:0009986,GO:0016021,GO:0016339,GO:0016342,GO:0034332,GO:0035249,GO:0042803,GO:0043083,GO:0043679,GO:0044331,GO:0045296,GO:0050807,GO:0097060,GO:0098609,GO:0098978	calcium ion binding|plasma membrane|cell-cell adherens junction|cell-cell junction assembly|cell adhesion|homophilic cell adhesion via plasma membrane adhesion molecules|cytoskeletal protein binding|response to cold|cell surface|integral component of membrane|calcium-dependent cell-cell adhesion via plasma membrane cell adhesion molecules|catenin complex|adherens junction organization|synaptic tr…
CDK1	90.7399	59.4697	122.01	2.05218	1.03716	0.000124034	0.0010635	Up	2.58808	3.55639	2.26292	1.54729	1.3673	0.909231	GeneID:100216432	cyclin dependent kinase 1	GO:0003682,GO:0004693,GO:0005524,GO:0005634,GO:0005737,GO:0005759,GO:0005813,GO:0005829,GO:0005876,GO:0006468,GO:0006915,GO:0007095,GO:0008283,GO:0008353,GO:0010971,GO:0018105,GO:0018107,GO:0030332,GO:0030496,GO:0030544,GO:0030855,GO:0034501,GO:0035173,GO:0043066,GO:0044772,GO:0051301,GO:0072686,GO:0090166,GO:0097125,GO:1900182,GO:1905448	chromatin binding|cyclin-dependent protein serine/threonine kinase activity|ATP binding|nucleus|cytoplasm|mitochondrial matrix|centrosome|cytosol|spindle microtubule|protein phosphorylation|apoptotic process|mitotic G2 DNA damage checkpoint|cell proliferation|RNA polymerase II CTD heptapeptide repeat kinase activity|positive regulation of G2/M transition of mitotic cell cycle|peptidyl-serine phos…	oas04110,oas04114,oas04115,oas04218,oas04540,oas04914,oas05170,oas05203	Cell cycle|Oocyte meiosis|p53 signaling pathway|Cellular senescence|Gap junction|Progesterone-mediated oocyte maturation|Human immunodeficiency virus 1 infection|Viral carcinogenesis
CDK5R1	315.068	421.849	208.287	0.49371	-1.01826	1.77616e-12	7.86531e-11	Down	1.5005	1.45458	1.62807	2.9725	3.22454	2.46502	GeneID:101120847	cyclin dependent kinase 5 regulatory subunit 1	GO:0001764,GO:0002020,GO:0005509,GO:0005634,GO:0005654,GO:0005737,GO:0005886,GO:0007158,GO:0007213,GO:0007411,GO:0007413,GO:0007420,GO:0009792,GO:0014069,GO:0016020,GO:0016301,GO:0016533,GO:0016534,GO:0018107,GO:0019901,GO:0021549,GO:0021722,GO:0021766,GO:0021819,GO:0030182,GO:0030424,GO:0030425,GO:0030426,GO:0030517,GO:0031116,GO:0031175,GO:0031594,GO:0032956,GO:0035235,GO:0035255,GO:0042501,GO:…	neuron migration|protease binding|calcium ion binding|nucleus|nucleoplasm|cytoplasm|plasma membrane|neuron cell-cell adhesion|G protein-coupled acetylcholine receptor signaling pathway|axon guidance|axonal fasciculation|brain development|embryo development ending in birth or egg hatching|postsynaptic density|membrane|kinase activity|protein kinase 5 complex|cyclin-dependent protein kinase 5 activ…	oas05010,oas05030	Alzheimer disease|Cocaine addiction
CDKN3	28.5371	8.73683	48.3375	5.53196	2.46779	4.13301e-07	6.99912e-06	Up	0.809951	0.993965	0.582183	0.0803004	0.114245	0.206471	GeneID:101116234	cyclin dependent kinase inhibitor 3	GO:0004722,GO:0004725,GO:0005737,GO:0007050,GO:0048471	protein serine/threonine phosphatase activity|protein tyrosine phosphatase activity|cytoplasm|cell cycle arrest|perinuclear region of cytoplasm
CDSN	28.5785	12.2371	44.9198	3.67057	1.876	2.27757e-05	0.000241816	Up	0.426072	0.590622	0.461906	0.0857199	0.130666	0.158946	GeneID:101109128	corneodesmosin	GO:0005576,GO:0042803,GO:0043589,GO:0098609	extracellular region|protein homodimerization activity|skin morphogenesis|cell-cell adhesion
CELSR2	15.9984	30.103	1.89378	0.0630187	-3.98808	3.79795e-06	4.95925e-05	Down	0.00258777	0.010321	0.00261413	0.117401	0.0949021	0.0184707	GeneID:101103606	cadherin EGF LAG seven-pass G-type receptor 2	GO:0004930,GO:0005509,GO:0005737,GO:0005886,GO:0006355,GO:0007156,GO:0007186,GO:0016021,GO:0016055,GO:0021999,GO:0022407,GO:0048813,GO:0060071	G protein-coupled receptor activity|calcium ion binding|cytoplasm|plasma membrane|regulation of transcription, DNA-templated|homophilic cell adhesion via plasma membrane adhesion molecules|G protein-coupled receptor signaling pathway|integral component of membrane|Wnt signaling pathway|neural plate anterior/posterior regionalization|regulation of cell-cell adhesion|dendrite morphogenesis|Wnt sign…
CENPA	48.6761	12.2369	85.1154	6.95464	2.79798	5.63001e-13	2.76822e-11	Up	1.01911	1.71848	1.302	0.154527	0.172738	0.213944	GeneID:101110750	centromere protein A	GO:0000777,GO:0000786,GO:0005634,GO:0006334,GO:0031492,GO:0046982	condensed chromosome kinetochore|nucleosome|nucleus|nucleosome assembly|nucleosomal DNA binding|protein heterodimerization activity
CENPE	78.5461	15.7322	141.36	8.98454	3.16744	2.992e-15	2.10162e-13	Up	0.256633	0.774057	0.405074	0.0330761	0.0504192	0.0654203	GeneID:101105752	centromere protein E	GO:0000278,GO:0000775,GO:0000776,GO:0000777,GO:0000779,GO:0003777,GO:0005524,GO:0005634,GO:0005654,GO:0005694,GO:0005828,GO:0005829,GO:0005871,GO:0005874,GO:0006890,GO:0007018,GO:0007052,GO:0007059,GO:0007079,GO:0007080,GO:0007275,GO:0008017,GO:0015630,GO:0016020,GO:0016887,GO:0019886,GO:0030071,GO:0030496,GO:0043515,GO:0045860,GO:0051233,GO:0051301,GO:0051310,GO:0051315,GO:0051382,GO:0099606,GO:…	mitotic cell cycle|chromosome, centromeric region|kinetochore|condensed chromosome kinetochore|condensed chromosome, centromeric region|microtubule motor activity|ATP binding|nucleus|nucleoplasm|chromosome|kinetochore microtubule|cytosol|kinesin complex|microtubule|retrograde vesicle-mediated transport, Golgi to ER|microtubule-based movement|mitotic spindle organization|chromosome segregation|mit…
CENPF	210.079	30.749	389.409	12.6629	3.66254	1.34221e-09	3.7453e-08	Up	0.578574	1.7382	0.78522	0.0700305	0.0474445	0.110296	GeneID:101112149	centromere protein F
CENPH	21.8565	13.9892	29.7237	2.12506	1.08751	0.03451	0.110203	Up	0.400612	1.03015	0.553791	0.369583	0.265115	0.236496	GeneID:101120440	centromere protein H	GO:0000776,GO:0000777,GO:0005730,GO:0043515,GO:0051382	kinetochore|condensed chromosome kinetochore|nucleolus|kinetochore binding|kinetochore assembly
CENPN	23.2764	10.838	35.7148	3.29561	1.72055	0.000505335	0.00356888	Up	0.500553	0.898376	0.488798	0.172037	0.157345	0.20416	GeneID:101121445	centromere protein N	GO:0000777,GO:0005634,GO:0007059,GO:0051382	condensed chromosome kinetochore|nucleus|chromosome segregation|kinetochore assembly
CENPT	29.849	12.5793	47.1187	3.74488	1.90492	0.000282811	0.00217743	Up	0.268066	0.987798	0.482725	0.144207	0.0854858	0.202033	GeneID:101115894	centromere protein T	GO:0000278,GO:0000775,GO:0000777,GO:0003677,GO:0005634,GO:0007059,GO:0046982,GO:0051276,GO:0051301,GO:0051382	mitotic cell cycle|chromosome, centromeric region|condensed chromosome kinetochore|DNA binding|nucleus|chromosome segregation|protein heterodimerization activity|chromosome organization|cell division|kinetochore assembly
CENPU	328.631	214.44	442.822	2.06531	1.04636	1.6081e-12	7.16559e-11	Up	8.23768	7.3262	7.14448	3.53766	3.95117	2.7724	GeneID:101108985	centromere protein U	GO:0000777,GO:0005634,GO:0005737,GO:0005815	condensed chromosome kinetochore|nucleus|cytoplasm|microtubule organizing center
CENPW	63.1631	30.4252	95.9009	3.15191	1.65623	8.843e-07	1.38108e-05	Up	1.09178	2.09833	1.6144	0.652588	0.397906	0.371086	GeneID:101117252	centromere protein W	GO:0000278,GO:0000775,GO:0000776,GO:0000777,GO:0003677,GO:0005654,GO:0005730,GO:0007059,GO:0016363,GO:0034080,GO:0046982,GO:0051276,GO:0051301,GO:0051382	mitotic cell cycle|chromosome, centromeric region|kinetochore|condensed chromosome kinetochore|DNA binding|nucleoplasm|nucleolus|chromosome segregation|nuclear matrix|CENP-A containing nucleosome assembly|protein heterodimerization activity|chromosome organization|cell division|kinetochore assembly
CEP55	21.5605	4.54647	38.5746	8.48555	3.08501	1.65192e-06	2.40846e-05	Up	0.236282	0.676056	0.342467	0.0105924	0.0645858	0.0628513	GeneID:101104542	centrosomal protein 55	GO:0000281,GO:0000920,GO:0005813,GO:0005814,GO:0005815,GO:0005886,GO:0014066,GO:0016020,GO:0030496,GO:0032154,GO:0045171,GO:0045184,GO:0061952,GO:0072001,GO:0090543,GO:1904888	mitotic cytokinesis|septum digestion after cytokinesis|centrosome|centriole|microtubule organizing center|plasma membrane|regulation of phosphatidylinositol 3-kinase signaling|membrane|midbody|cleavage furrow|intercellular bridge|establishment of protein localization|midbody abscission|renal system development|Flemming body|cranial skeletal system development
CEP72	15.7442	5.24471	26.2436	5.00398	2.32308	0.000204206	0.00163583	Up	0.199529	0.397899	0.231796	0.0411462	0.0522672	0.0610363	GeneID:101109828	centrosomal protein 72	GO:0005813,GO:0007051,GO:0007099,GO:0033566,GO:0034451,GO:0042802,GO:1904779	centrosome|spindle organization|centriole replication|gamma-tubulin complex localization|centriolar satellite|identical protein binding|regulation of protein localization to centrosome
CFB	1553.43	2776.09	330.777	0.119144	-3.06922	9.1929e-31	4.0963e-28	Down	3.6834	3.05516	4.64293	33.4976	34.4965	21.2167	GeneID:101115072	complement factor B	GO:0004252,GO:0005576,GO:0006957	serine-type endopeptidase activity|extracellular region|complement activation, alternative pathway	oas04610,oas05150	Complement and coagulation cascades|Staphylococcus aureus infection
CH25H	8861.26	12218.3	5504.2	0.450486	-1.15044	2.16112e-27	6.699e-25	Down	74.1596	69.0624	77.3561	168.647	169.448	118.884	GeneID:101121645	cholesterol 25-hydroxylase	GO:0000254,GO:0001567,GO:0005506,GO:0005789,GO:0008203,GO:0008395,GO:0016021,GO:0016126,GO:0035754	C-4 methylsterol oxidase activity|cholesterol 25-hydroxylase activity|iron ion binding|endoplasmic reticulum membrane|cholesterol metabolic process|steroid hydroxylase activity|integral component of membrane|sterol biosynthetic process|B cell chemotaxis	oas00120	Primary bile acid biosynthesis
CHRDL1	11.6967	19.5839	3.80949	0.194167	-2.36463	0.000721955	0.00480595	Down	0.0141303	0.0281784	0.0428227	0.131125	0.140655	0.136878	GeneID:101113311	chordin like 1	GO:0001503,GO:0001654,GO:0005576,GO:0005788,GO:0007399,GO:0030154,GO:0030509,GO:0030514,GO:0043687,GO:0044267,GO:0048749	ossification|eye development|extracellular region|endoplasmic reticulum lumen|nervous system development|cell differentiation|BMP signaling pathway|negative regulation of BMP signaling pathway|post-translational protein modification|cellular protein metabolic process|compound eye development
CIT	100.245	24.4806	176.009	7.19055	2.8461	1.86516e-15	1.3569e-13	Up	0.366774	0.842843	0.387879	0.0354538	0.0870701	0.0847319	GeneID:101107309	citron rho-interacting serine/threonine kinase	GO:0000086,GO:0000278,GO:0000281,GO:0004674,GO:0005524,GO:0005829,GO:0007030,GO:0008064,GO:0016020,GO:0017048,GO:0017124,GO:0030165,GO:0030496,GO:0031985,GO:0032154,GO:0032467,GO:0035556,GO:0043025,GO:0046872,GO:0048699,GO:0051402,GO:0097110	G2/M transition of mitotic cell cycle|mitotic cell cycle|mitotic cytokinesis|protein serine/threonine kinase activity|ATP binding|cytosol|Golgi organization|regulation of actin polymerization or depolymerization|membrane|Rho GTPase binding|SH3 domain binding|PDZ domain binding|midbody|Golgi cisterna|cleavage furrow|positive regulation of cytokinesis|intracellular signal transduction|neuronal cell…
CKAP2	476.49	304.322	648.658	2.13158	1.09192	1.36237e-12	6.20641e-11	Up	4.73906	7.18655	5.74308	2.5629	2.93793	2.23636	GeneID:101121357	cytoskeleton associated protein 2	GO:0005737,GO:0005874,GO:0006915,GO:0007049	cytoplasm|microtubule|apoptotic process|cell cycle
CKAP2L	63.3954	36.7238	90.067	2.45298	1.29453	0.000489638	0.00347697	Up	0.471121	1.34215	0.586402	0.303602	0.326158	0.283086	GeneID:101112209	cytoskeleton associated protein 2 like	GO:0000922,GO:0005813,GO:0005829,GO:0072686	spindle pole|centrosome|cytosol|mitotic spindle
CLCN4	35.9031	23.4281	48.3781	2.06515	1.04625	0.00968776	0.0409655	Up	0.184913	0.322657	0.200807	0.0667311	0.121096	0.131985	GeneID:100125626	chloride voltage-gated channel 4	GO:0005247,GO:0005254,GO:0005524,GO:0005768,GO:0005769,GO:0005789,GO:0005794,GO:0005886,GO:0005887,GO:0006821,GO:0010008,GO:0015297,GO:0015299,GO:0031404,GO:0031901,GO:0031902,GO:0034220	voltage-gated chloride channel activity|chloride channel activity|ATP binding|endosome|early endosome|endoplasmic reticulum membrane|Golgi apparatus|plasma membrane|integral component of plasma membrane|chloride transport|endosome membrane|antiporter activity|solute:proton antiporter activity|chloride ion binding|early endosome membrane|late endosome membrane|ion transmembrane transport
CLMN	21.1288	28.34	13.9177	0.491206	-1.0256	0.041495	0.12716	Down	0.0329867	0.0803997	0.0481328	0.105815	0.126734	0.0747457	GeneID:101115830	calmin	GO:0005640,GO:0005737,GO:0007097,GO:0008285,GO:0016021,GO:0031175,GO:0034993,GO:0051015,GO:0051647,GO:0090286	nuclear outer membrane|cytoplasm|nuclear migration|negative regulation of cell proliferation|integral component of membrane|neuron projection development|meiotic nuclear membrane microtubule tethering complex|actin filament binding|nucleus localization|cytoskeletal anchoring at nuclear membrane
CLSPN	27.4138	18.177	36.6506	2.0166	1.01193	0.0228151	0.0800888	Up	0.175891	0.265574	0.142146	0.0725429	0.0789857	0.117859	GeneID:101110630	claspin
CNGA3	370.372	501.323	239.421	0.477645	-1.06599	1.31084e-11	5.13904e-10	Down	1.86606	1.78426	1.63185	3.71889	4.00539	2.59855	GeneID:100233164	cyclic nucleotide gated channel alpha 3	GO:0005222,GO:0005223,GO:0007601,GO:0016021,GO:0030553,GO:0050896	intracellular cAMP-activated cation channel activity|intracellular cGMP-activated cation channel activity|visual perception|integral component of membrane|cGMP binding|response to stimulus
CNIH3	14.8779	6.99098	22.7647	3.25608	1.70314	0.00505531	0.0243939	Up	1.00192	1.73512	1.0654	0.489345	0.221016	0.376391	GeneID:101110075	cornichon family AMPA receptor auxiliary protein 3	GO:0000139,GO:0005789,GO:0006888,GO:0012507,GO:0016247,GO:0030054,GO:0032281,GO:0033116,GO:0035249,GO:0042391,GO:0043198,GO:0045211,GO:0048208,GO:2000311	Golgi membrane|endoplasmic reticulum membrane|ER to Golgi vesicle-mediated transport|ER to Golgi transport vesicle membrane|channel regulator activity|cell junction|AMPA glutamate receptor complex|endoplasmic reticulum-Golgi intermediate compartment membrane|synaptic transmission, glutamatergic|regulation of membrane potential|dendritic shaft|postsynaptic membrane|COPII vesicle coating|regulation…
CNKSR2	13.5837	19.5832	7.58416	0.387475	-1.36782	0.0280486	0.0937078	Down	0.0187836	0.0294313	0.0162643	0.0774697	0.0393633	0.0383062	GeneID:101106407	connector enhancer of kinase suppressor of Ras 2	GO:0005737,GO:0009966,GO:0042802,GO:0043005,GO:0043025,GO:0070062,GO:0098978,GO:0099147,GO:0099173	cytoplasm|regulation of signal transduction|identical protein binding|neuron projection|neuronal cell body|extracellular exosome|glutamatergic synapse|extrinsic component of postsynaptic density membrane|postsynapse organization
CNTD2	26.2597	39.5581	12.9614	0.3278	-1.60911	0.00228736	0.0126368	Down	0.143694	0.0754087	0.0916788	0.350906	0.427919	0.107963	GeneID:101118980	cyclin N-terminal domain containing 2	GO:0000079,GO:0000278,GO:0000307,GO:0005634,GO:0005737,GO:0006468,GO:0007088,GO:0008284,GO:0016538,GO:0019901,GO:0045787	regulation of cyclin-dependent protein serine/threonine kinase activity|mitotic cell cycle|cyclin-dependent protein kinase holoenzyme complex|nucleus|cytoplasm|protein phosphorylation|regulation of mitotic nuclear division|positive regulation of cell proliferation|cyclin-dependent protein serine/threonine kinase regulator activity|protein kinase binding|positive regulation of cell cycle
CNTN1	39.7174	24.4708	54.964	2.24654	1.16771	0.00171412	0.00992355	Up	0.249114	0.213406	0.148865	0.0687363	0.0772044	0.10733	GeneID:101118005	contactin 1	GO:0005886,GO:0007155,GO:0007219,GO:0031175,GO:0031225	plasma membrane|cell adhesion|Notch signaling pathway|neuron projection development|anchored component of membrane	oas04514	Cell adhesion molecules (CAMs)
CNTN3	4.79416	1.04707	8.54124	8.14706	3.02628	0.0136256	0.0536348	Up	0.0667245	0.0255887	0.0466645	0.00529218	0	0.0104672	GeneID:101113628	contactin 3	GO:0005576,GO:0005886,GO:0007155,GO:0007399,GO:0031225	extracellular region|plasma membrane|cell adhesion|nervous system development|anchored component of membrane
COCH	19.5378	31.4934	7.58224	0.240965	-2.0531	0.000161763	0.00134026	Down	0.0888149	0.0708454	0.0538318	0.302199	0.353632	0.172068	GeneID:101102269	cochlin
COL13A1	94.1672	61.1475	127.187	2.07953	1.05626	0.000162407	0.00134481	Up	1.17303	1.07837	1.10094	0.428897	0.322533	0.746506	GeneID:101105550	collagen type XIII alpha 1 chain	GO:0001763,GO:0001958,GO:0005201,GO:0005576,GO:0005600,GO:0005615,GO:0005788,GO:0005886,GO:0005911,GO:0007160,GO:0008201,GO:0030020,GO:0030154,GO:0030198,GO:0030574,GO:0031012,GO:0045211,GO:0062023,GO:0098609	morphogenesis of a branching structure|endochondral ossification|extracellular matrix structural constituent|extracellular region|collagen type XIII trimer|extracellular space|endoplasmic reticulum lumen|plasma membrane|cell-cell junction|cell-matrix adhesion|heparin binding|extracellular matrix structural constituent conferring tensile strength|cell differentiation|extracellular matrix organizat…	oas04974	Protein digestion and absorption
COL18A1	115.542	175.92	55.1648	0.313369	-1.67407	1.31549e-11	5.13904e-10	Down	0.213057	0.313346	0.403553	1.07094	0.904137	0.792957	GeneID:101106232	collagen type XVIII alpha 1 chain	GO:0001525,GO:0001886,GO:0005201,GO:0005576,GO:0005581,GO:0005604,GO:0005615,GO:0005788,GO:0007155,GO:0007601,GO:0008284,GO:0008285,GO:0009887,GO:0030020,GO:0030198,GO:0030335,GO:0031012,GO:0042493,GO:0042802,GO:0046872,GO:0051599,GO:0062023,GO:0070062,GO:2000353	angiogenesis|endothelial cell morphogenesis|extracellular matrix structural constituent|extracellular region|collagen trimer|basement membrane|extracellular space|endoplasmic reticulum lumen|cell adhesion|visual perception|positive regulation of cell proliferation|negative regulation of cell proliferation|animal organ morphogenesis|extracellular matrix structural constituent conferring tensile st…	oas04974	Protein digestion and absorption
COL4A4	75.5104	46.1461	104.875	2.27296	1.18457	0.000238656	0.0018763	Up	0.32786	0.606594	0.276	0.184049	0.12978	0.182013	GeneID:101118172	collagen type IV alpha 4 chain	GO:0005201,GO:0005587,GO:0005604,GO:0007155	extracellular matrix structural constituent|collagen type IV trimer|basement membrane|cell adhesion	oas04151,oas04510,oas04512,oas04926,oas04933,oas04974,oas05146,oas05165,oas05200,oas05222	PI3K-Akt signaling pathway|Focal adhesion|ECM-receptor interaction|Relaxin signaling pathway|AGE-RAGE signaling pathway in diabetic complications|Protein digestion and absorption|Amoebiasis|Human papillomavirus infection|Pathways in cancer|Small cell lung cancer
COL6A6	25.1094	16.4212	33.7976	2.05816	1.04136	0.0424855	0.129337	Up	0.187288	0.0753526	0.0896191	0.0406545	0.0344284	0.0837596	GeneID:101111424	collagen type VI alpha 6 chain	GO:0005576,GO:0005581,GO:0007155,GO:0030020,GO:0031012,GO:0062023	extracellular region|collagen trimer|cell adhesion|extracellular matrix structural constituent conferring tensile strength|extracellular matrix|collagen-containing extracellular matrix	oas04151,oas04510,oas04512,oas04974,oas05165	PI3K-Akt signaling pathway|Focal adhesion|ECM-receptor interaction|Protein digestion and absorption|Human papillomavirus infection
COL8A2	49.5424	30.7679	68.3169	2.2204	1.15082	0.000675973	0.004553	Up	0.52459	0.337086	0.400395	0.228378	0.134364	0.166416	GeneID:105602841	collagen type VIII alpha 2 chain	GO:0001525,GO:0005201,GO:0005576,GO:0005581,GO:0005604,GO:0005615,GO:0005788,GO:0030020,GO:0030198,GO:0030674,GO:0031012,GO:0048593,GO:0050673,GO:0062023,GO:0098609	angiogenesis|extracellular matrix structural constituent|extracellular region|collagen trimer|basement membrane|extracellular space|endoplasmic reticulum lumen|extracellular matrix structural constituent conferring tensile strength|extracellular matrix organization|protein binding, bridging|extracellular matrix|camera-type eye morphogenesis|epithelial cell proliferation|collagen-containing extrac…
COL9A3	17.0544	25.886	8.22285	0.317749	-1.65404	0.0021539	0.0119924	Down	0.105383	0.0840613	0.0851653	0.249914	0.320222	0.236403	GeneID:101120183	collagen type IX alpha 3 chain	GO:0005201,GO:0005576,GO:0005594,GO:0005615,GO:0005788,GO:0008584,GO:0008585,GO:0030020,GO:0030198,GO:0031012	extracellular matrix structural constituent|extracellular region|collagen type IX trimer|extracellular space|endoplasmic reticulum lumen|male gonad development|female gonad development|extracellular matrix structural constituent conferring tensile strength|extracellular matrix organization|extracellular matrix	oas04151,oas04510,oas04512,oas04974,oas05165	PI3K-Akt signaling pathway|Focal adhesion|ECM-receptor interaction|Protein digestion and absorption|Human papillomavirus infection
CORO1A	21.0151	9.44331	32.5868	3.45106	1.78704	0.000540674	0.00377545	Up	0.380197	0.742387	0.512093	0.130671	0.165989	0.145378	GeneID:101114326	coronin 1A	GO:0001772,GO:0001845,GO:0001891,GO:0003785,GO:0005769,GO:0005829,GO:0005884,GO:0005911,GO:0006816,GO:0007015,GO:0008022,GO:0008360,GO:0030027,GO:0030335,GO:0030424,GO:0030595,GO:0030670,GO:0030864,GO:0031339,GO:0031589,GO:0032036,GO:0032796,GO:0032991,GO:0038180,GO:0042102,GO:0042803,GO:0043029,GO:0043320,GO:0043524,GO:0043548,GO:0048873,GO:0050918,GO:0051015,GO:0051126,GO:0051279,GO:0061502,GO:…	immunological synapse|phagolysosome assembly|phagocytic cup|actin monomer binding|early endosome|cytosol|actin filament|cell-cell junction|calcium ion transport|actin filament organization|protein C-terminus binding|regulation of cell shape|lamellipodium|positive regulation of cell migration|axon|leukocyte chemotaxis|phagocytic vesicle membrane|cortical actin cytoskeleton|negative regulation of v…	oas04145,oas05152	Phagosome|Tuberculosis
CPEB1	110.945	47.2344	174.655	3.69845	1.88692	7.91034e-15	5.22192e-13	Up	1.43251	1.72416	1.53273	0.436992	0.479609	0.267937	GeneID:101110092	cytoplasmic polyadenylation element binding protein 1	GO:0000900,GO:0000932,GO:0003730,GO:0005634,GO:0005654,GO:0005737,GO:0005829,GO:0006397,GO:0008135,GO:0014069,GO:0030054,GO:0030425,GO:0032869,GO:0035925,GO:0043005,GO:0043022,GO:0045202,GO:0045211,GO:0046872,GO:0071230,GO:0071456,GO:1900365,GO:1990124,GO:2000766	translation repressor activity, mRNA regulatory element binding|P-body|mRNA 3'-UTR binding|nucleus|nucleoplasm|cytoplasm|cytosol|mRNA processing|translation factor activity, RNA binding|postsynaptic density|cell junction|dendrite|cellular response to insulin stimulus|mRNA 3'-UTR AU-rich region binding|neuron projection|ribosome binding|synapse|postsynaptic membrane|metal ion binding|cellular resp…	oas04114,oas04914	Oocyte meiosis|Progesterone-mediated oocyte maturation
CPNE7	2.95824	5.59617	0.320307	0.0607746	-4.04039	0.0143529	0.0558937	Down	0	0	0.00931587	0.0855768	0.0386512	0.02821	GeneID:101110962	copine 7	GO:0005544,GO:0005634,GO:0005737,GO:0005886,GO:0071277	calcium-dependent phospholipid binding|nucleus|cytoplasm|plasma membrane|cellular response to calcium ion
CPNE9	24.1007	34.6239	13.5775	0.392449	-1.34942	0.00543683	0.0258499	Down	0.17419	0.0755146	0.0765064	0.327972	0.238067	0.208506	GeneID:101104863	copine family member 9	GO:0005544,GO:0005615,GO:0005886,GO:0070062,GO:0071277,GO:1903861	calcium-dependent phospholipid binding|extracellular space|plasma membrane|extracellular exosome|cellular response to calcium ion|positive regulation of dendrite extension
CPZ	62.2783	84.9531	39.6034	0.465997	-1.10161	0.00143019	0.00856855	Down	0.691262	0.242515	0.672442	1.06912	0.912096	1.22698	GeneID:101120411	carboxypeptidase Z	GO:0004181,GO:0005615,GO:0006508,GO:0006518,GO:0008270,GO:0016055,GO:0016485	metallocarboxypeptidase activity|extracellular space|proteolysis|peptide metabolic process|zinc ion binding|Wnt signaling pathway|protein processing
CREB3L4	65.8165	43.3574	88.2756	2.03589	1.02566	0.000178109	0.00145456	Up	0.72129	0.750462	0.720718	0.282932	0.336812	0.383728	GeneID:101107485	cAMP responsive element binding protein 3 like 4	GO:0000139,GO:0000981,GO:0001228,GO:0005654,GO:0005739,GO:0005783,GO:0005789,GO:0005794,GO:0007283,GO:0016021,GO:0030968,GO:0031965,GO:0035497,GO:0045944	Golgi membrane|DNA-binding transcription factor activity, RNA polymerase II-specific|DNA-binding transcription activator activity, RNA polymerase II-specific|nucleoplasm|mitochondrion|endoplasmic reticulum|endoplasmic reticulum membrane|Golgi apparatus|spermatogenesis|integral component of membrane|endoplasmic reticulum unfolded protein response|nuclear membrane|cAMP response element binding|posi…	oas04022,oas04024,oas04151,oas04152,oas04211,oas04261,oas04668,oas04714,oas04725,oas04728,oas04911,oas04915,oas04916,oas04918,oas04922,oas04925,oas04926,oas04927,oas04928,oas04931,oas04934,oas04962,oas05016,oas05030,oas05031,oas05034,oas05161,oas05163,oas05165,oas05166,oas05203,oas05215	cGMP-PKG signaling pathway|cAMP signaling pathway|PI3K-Akt signaling pathway|AMPK signaling pathway|Longevity regulating pathway|Adrenergic signaling in cardiomyocytes|TNF signaling pathway|Thermogenesis|Cholinergic synapse|Dopaminergic synapse|Insulin secretion|Estrogen signaling pathway|Melanogenesis|Thyroid hormone synthesis|Glucagon signaling pathway|Aldosterone synthesis and secretion|Relaxi…
CREG2	92.0231	60.838	123.208	2.02463	1.01766	2.87018e-05	0.000294856	Up	2.4554	2.57381	3.15882	1.08193	1.23142	1.45514	GeneID:101110318	cellular repressor of E1A stimulated genes 2	GO:0005576,GO:0005783,GO:0005794,GO:0048037	extracellular region|endoplasmic reticulum|Golgi apparatus|cofactor binding
CRMP1	35.1167	20.9738	49.2597	2.3491	1.23211	0.00394799	0.0200051	Up	0.505764	0.504294	0.284773	0.256467	0.0955637	0.160632	GeneID:101102645	collapsin response mediator protein 1	GO:0000226,GO:0005813,GO:0005819,GO:0005829,GO:0006139,GO:0007399,GO:0007411,GO:0010977,GO:0016810,GO:0030496,GO:0031005,GO:1904530	microtubule cytoskeleton organization|centrosome|spindle|cytosol|nucleobase-containing compound metabolic process|nervous system development|axon guidance|negative regulation of neuron projection development|hydrolase activity, acting on carbon-nitrogen (but not peptide) bonds|midbody|filamin binding|negative regulation of actin filament binding
CSF1R	9.30502	16.0892	2.52086	0.157042	-2.67078	0.0018303	0.0104518	Down	0.0351965	0.0140377	0.00711102	0.181452	0.0885101	0.0645999	GeneID:101109969	colony stimulating factor 1 receptor	GO:0004714,GO:0004888,GO:0005011,GO:0005524,GO:0005737,GO:0005887,GO:0006954,GO:0007169,GO:0008284,GO:0008360,GO:0009968,GO:0009986,GO:0018108,GO:0019955,GO:0030154,GO:0030316,GO:0030335,GO:0031529,GO:0036006,GO:0042531,GO:0043066,GO:0043235,GO:0045087,GO:0045124,GO:0046488,GO:0046777,GO:0048015,GO:0070374,GO:0071345,GO:0071902,GO:1990682,GO:2000249	transmembrane receptor protein tyrosine kinase activity|transmembrane signaling receptor activity|macrophage colony-stimulating factor receptor activity|ATP binding|cytoplasm|integral component of plasma membrane|inflammatory response|transmembrane receptor protein tyrosine kinase signaling pathway|positive regulation of cell proliferation|regulation of cell shape|negative regulation of signal tr…	oas04010,oas04014,oas04015,oas04060,oas04151,oas04380,oas04640,oas05200,oas05202,oas05221	MAPK signaling pathway|Ras signaling pathway|Rap1 signaling pathway|Cytokine-cytokine receptor interaction|PI3K-Akt signaling pathway|Osteoclast differentiation|Hematopoietic cell lineage|Pathways in cancer|Transcriptional misregulation in cancer|Acute myeloid leukemia
CSF3	2.25639	4.1986	0.314182	0.08101	-3.62576	0.0370575	0.116474	Down	0.012204	0	0	0.0503332	0.0639374	0.0373322	GeneID:443523	colony stimulating factor 3	GO:0005125,GO:0005130,GO:0005615,GO:0006955,GO:0008083,GO:0008284,GO:0014068,GO:0019899,GO:0030838,GO:0032092,GO:0033138,GO:0045639,GO:0045944,GO:0050731,GO:0051091,GO:0051897,GO:0071345,GO:2000251	cytokine activity|granulocyte colony-stimulating factor receptor binding|extracellular space|immune response|growth factor activity|positive regulation of cell proliferation|positive regulation of phosphatidylinositol 3-kinase signaling|enzyme binding|positive regulation of actin filament polymerization|positive regulation of protein binding|positive regulation of peptidyl-serine phosphorylation|…	oas04060,oas04151,oas04630,oas04640,oas04657,oas05144	Cytokine-cytokine receptor interaction|PI3K-Akt signaling pathway|Jak-STAT signaling pathway|Hematopoietic cell lineage|IL-17 signaling pathway|Malaria
CSMD2	5.94262	1.7486	10.1366	5.79587	2.53503	0.0135114	0.0533681	Up	0.0285579	0.0101696	0.0267882	0.00210325	0.00427475	0.00415996	GeneID:101114234	CUB and Sushi multiple domains 2	GO:0005886,GO:0016021	plasma membrane|integral component of membrane
CXCL16	952.731	1329.28	576.178	0.433459	-1.20603	2.75719e-20	3.67427e-18	Down	10.5318	10.0966	10.2292	25.7272	23.9659	16.7376	GeneID:101111722	C-X-C motif chemokine ligand 16	GO:0005041,GO:0005044,GO:0005615,GO:0008009,GO:0010818,GO:0016021,GO:0030307,GO:0030335,GO:0034341,GO:0034612	low-density lipoprotein particle receptor activity|scavenger receptor activity|extracellular space|chemokine activity|T cell chemotaxis|integral component of membrane|positive regulation of cell growth|positive regulation of cell migration|response to interferon-gamma|response to tumor necrosis factor	oas04060,oas04062	Cytokine-cytokine receptor interaction|Chemokine signaling pathway
CXCL8	830.549	1275.55	385.547	0.302215	-1.72635	4.63054e-29	1.57207e-26	Down	7.24231	5.94268	8.86688	23.892	27.0047	17.2373	GeneID:443418	C-X-C motif chemokine ligand 8	GO:0005153,GO:0005615,GO:0006954,GO:0006955,GO:0007050,GO:0008009,GO:0030155,GO:0030593,GO:0042119,GO:0045091,GO:0050930	interleukin-8 receptor binding|extracellular space|inflammatory response|immune response|cell cycle arrest|chemokine activity|regulation of cell adhesion|neutrophil chemotaxis|neutrophil activation|regulation of single stranded viral RNA replication via double stranded DNA intermediate|induction of positive chemotaxis	oas04060,oas04062,oas04064,oas04072,oas04218,oas04620,oas04621,oas04622,oas04657,oas04932,oas04933,oas05132,oas05133,oas05134,oas05142,oas05144,oas05146,oas05161,oas05163,oas05164,oas05167,oas05200,oas05202,oas05219,oas05323	Cytokine-cytokine receptor interaction|Chemokine signaling pathway|NF-kappa B signaling pathway|Phospholipase D signaling pathway|Cellular senescence|Toll-like receptor signaling pathway|NOD-like receptor signaling pathway|RIG-I-like receptor signaling pathway|IL-17 signaling pathway|Non-alcoholic fatty liver disease (NAFLD)|AGE-RAGE signaling pathway in diabetic complications|Salmonella infectio…
CXCR4	37.3428	53.176	21.5097	0.404584	-1.30549	0.000389063	0.00286109	Down	0.376748	0.465094	0.380586	0.869405	1.16548	0.786611	GeneID:443532	C-X-C motif chemokine receptor 4	GO:0001666,GO:0003779,GO:0005764,GO:0005769,GO:0005770,GO:0005886,GO:0006935,GO:0006955,GO:0007204,GO:0007420,GO:0009897,GO:0016021,GO:0016493,GO:0019722,GO:0019956,GO:0019957,GO:0022008,GO:0030054,GO:0031252,GO:0031625,GO:0032027,GO:0032991,GO:0038147,GO:0038160,GO:0043130,GO:0050920,GO:0060326,GO:0071345	response to hypoxia|actin binding|lysosome|early endosome|late endosome|plasma membrane|chemotaxis|immune response|positive regulation of cytosolic calcium ion concentration|brain development|external side of plasma membrane|integral component of membrane|C-C chemokine receptor activity|calcium-mediated signaling|chemokine binding|C-C chemokine binding|neurogenesis|cell junction|cell leading edge…	oas04020,oas04060,oas04062,oas04144,oas04360,oas04670,oas04672,oas04810,oas05163,oas05170,oas05200	Calcium signaling pathway|Cytokine-cytokine receptor interaction|Chemokine signaling pathway|Endocytosis|Axon guidance|Leukocyte transendothelial migration|Intestinal immune network for IgA production|Regulation of actin cytoskeleton|Human cytomegalovirus infection|Human immunodeficiency virus 1 infection|Pathways in cancer
CYP2D6	34.5312	21.0019	48.0604	2.28939	1.19496	0.00494348	0.023984	Up	0.863459	0.893438	0.724137	0.419951	0.460906	0.132897	GeneID:100568286	cytochrome P450 2D6	GO:0005506,GO:0005737,GO:0005789,GO:0006082,GO:0006805,GO:0008395,GO:0016712,GO:0019369,GO:0020037,GO:0031090,GO:0042738,GO:0043231,GO:0055114,GO:0070330	iron ion binding|cytoplasm|endoplasmic reticulum membrane|organic acid metabolic process|xenobiotic metabolic process|steroid hydroxylase activity|oxidoreductase activity, acting on paired donors, with incorporation or reduction of molecular oxygen, reduced flavin or flavoprotein as one donor, and incorporation of one atom of oxygen|arachidonic acid metabolic process|heme binding|organelle membra…	oas00140,oas04726	Steroid hormone biosynthesis|Serotonergic synapse
CYP3A24	10.5579	15.7416	5.37428	0.341551	-1.54983	0.0319129	0.10375	Down	0.130412	0.0650166	0.0823381	0.403397	0.222052	0.132978	GeneID:100170111	cytochrome P450 CYP3A24	GO:0004497,GO:0005506,GO:0005789,GO:0020037,GO:0031090,GO:0070330	monooxygenase activity|iron ion binding|endoplasmic reticulum membrane|heme binding|organelle membrane|aromatase activity	oas00140,oas00591,oas00830,oas05204	Steroid hormone biosynthesis|Linoleic acid metabolism|Retinol metabolism|Chemical carcinogenesis
DAAM2	108.123	144.834	71.4125	0.493296	-1.01948	2.577e-05	0.000269001	Down	0.30941	0.359929	0.228411	0.572612	0.677501	0.448976	GeneID:101103274	dishevelled associated activator of morphogenesis 2	GO:0003779,GO:0007368,GO:0016055,GO:0017048,GO:0021516,GO:0030036,GO:0048715,GO:0060828,GO:0070062,GO:0090263,GO:2000050	actin binding|determination of left/right symmetry|Wnt signaling pathway|Rho GTPase binding|dorsal spinal cord development|actin cytoskeleton organization|negative regulation of oligodendrocyte differentiation|regulation of canonical Wnt signaling pathway|extracellular exosome|positive regulation of canonical Wnt signaling pathway|regulation of non-canonical Wnt signaling pathway	oas04310	Wnt signaling pathway
DCDC2B	7.56047	12.6056	2.51538	0.200022	-2.32177	0.0393673	0.122083	Down	0.0623183	0.0372823	0	0.257021	0.208953	0	GeneID:101116209	doublecortin domain containing 2B	GO:0005815,GO:0005874,GO:0035556	microtubule organizing center|microtubule|intracellular signal transduction
DDIAS	85.8568	52.4286	119.285	2.2748	1.18574	1.47719e-05	0.000165723	Up	0.718019	1.04636	0.843899	0.391524	0.24596	0.42943	GeneID:101114477	DNA damage induced apoptosis suppressor	GO:0005634,GO:0005737,GO:0006915,GO:0007050,GO:0097752,GO:1902230	nucleus|cytoplasm|apoptotic process|cell cycle arrest|regulation of DNA stability|negative regulation of intrinsic apoptotic signaling pathway in response to DNA damage
DDIT4	2579.59	3520.37	1638.82	0.465526	-1.10307	8.29011e-20	1.04609e-17	Down	24.1498	29.4409	26.6122	62.7051	56.7285	41.3408	GeneID:101114584	DNA damage inducible transcript 4	GO:0001666,GO:0001764,GO:0005737,GO:0005739,GO:0005829,GO:0007420,GO:0008283,GO:0010801,GO:0030182,GO:0032007,GO:0032984,GO:0033137,GO:0042771,GO:0045820,GO:0048011,GO:0051607,GO:0071549,GO:0071889,GO:0072593,GO:1901216,GO:1902532	response to hypoxia|neuron migration|cytoplasm|mitochondrion|cytosol|brain development|cell proliferation|negative regulation of peptidyl-threonine phosphorylation|neuron differentiation|negative regulation of TOR signaling|protein-containing complex disassembly|negative regulation of peptidyl-serine phosphorylation|intrinsic apoptotic signaling pathway in response to DNA damage by p53 class medi…	oas04140,oas04150,oas04151,oas05206	Autophagy - animal|mTOR signaling pathway|PI3K-Akt signaling pathway|MicroRNAs in cancer
DEPDC1	44.513	13.642	75.3839	5.52795	2.46675	4.25415e-07	7.1533e-06	Up	0.383183	0.887387	0.20603	0.0637247	0.103614	0.0819254	GeneID:101116779	DEP domain containing 1	GO:0005096,GO:0005634,GO:0017053,GO:0035556,GO:0045892	GTPase activator activity|nucleus|transcriptional repressor complex|intracellular signal transduction|negative regulation of transcription, DNA-templated
DHRS3	233.157	316.834	149.48	0.471772	-1.08384	0.0420782	0.128396	Down	1.64768	1.71134	2.05747	2.15901	2.23	6.27701	GeneID:101109288	dehydrogenase/reductase 3	GO:0000166,GO:0001523,GO:0003151,GO:0004745,GO:0005789,GO:0005811,GO:0007601,GO:0009055,GO:0016021,GO:0030278,GO:0042572,GO:0042622,GO:0048387,GO:0052650,GO:0060021,GO:0060349,GO:0060411	nucleotide binding|retinoid metabolic process|outflow tract morphogenesis|retinol dehydrogenase activity|endoplasmic reticulum membrane|lipid droplet|visual perception|electron transfer activity|integral component of membrane|regulation of ossification|retinol metabolic process|photoreceptor outer segment membrane|negative regulation of retinoic acid receptor signaling pathway|NADP-retinol dehydr…	oas00830	Retinol metabolism
DIAPH3	165.138	42.655	287.62	6.74297	2.75338	2.88054e-26	7.60622e-24	Up	1.42651	2.49639	1.38222	0.204117	0.237933	0.290914	GeneID:101105168	diaphanous related formin 3	GO:0003779,GO:0005634,GO:0005737,GO:0005829,GO:0007010,GO:0007283,GO:0017048,GO:0030036,GO:0030041,GO:0045296	actin binding|nucleus|cytoplasm|cytosol|cytoskeleton organization|spermatogenesis|Rho GTPase binding|actin cytoskeleton organization|actin filament polymerization|cadherin binding	oas04810	Regulation of actin cytoskeleton
DLGAP5	49.8874	4.19242	95.5824	22.7842	4.50996	1.908e-13	1.02665e-11	Up	0.275491	1.49363	0.834892	0.0355066	0.0180414	0.0526706	GeneID:101118701	DLG associated protein 5	GO:0004721,GO:0005634,GO:0005739,GO:0005815,GO:0005829,GO:0007079,GO:0007221,GO:0008283,GO:0031616,GO:0045842	phosphoprotein phosphatase activity|nucleus|mitochondrion|microtubule organizing center|cytosol|mitotic chromosome movement towards spindle pole|positive regulation of transcription of Notch receptor target|cell proliferation|spindle pole centrosome|positive regulation of mitotic metaphase/anaphase transition
DNAH3	12.9915	6.65066	19.3323	2.90709	1.53958	0.0173258	0.0649275	Up	0.0238675	0.0373971	0.0430548	0.0123047	0.016077	0.00521508	GeneID:101113559	dynein axonemal heavy chain 3	GO:0003341,GO:0003777,GO:0005524,GO:0005858,GO:0005874,GO:0007018,GO:0008569,GO:0030286,GO:0045503,GO:0045505,GO:0051959,GO:0060285	cilium movement|microtubule motor activity|ATP binding|axonemal dynein complex|microtubule|microtubule-based movement|ATP-dependent microtubule motor activity, minus-end-directed|dynein complex|dynein light chain binding|dynein intermediate chain binding|dynein light intermediate chain binding|cilium-dependent cell motility	oas05016	Huntington disease
DNAJC22	32.2598	17.1257	47.394	2.76751	1.46859	0.00037477	0.00277515	Up	0.675665	0.605189	0.439608	0.177118	0.143994	0.256899	GeneID:101101970	DnaJ heat shock protein family (Hsp40) member C22	GO:0016021	integral component of membrane
DNAJC28	54.9986	35.6744	74.3227	2.08368	1.05913	0.00038133	0.00281002	Up	0.600178	0.659811	0.551881	0.301482	0.274124	0.235378	GeneID:101121989	DnaJ heat shock protein family (Hsp40) member C28	GO:0006890,GO:0007030,GO:0017119,GO:0048213	retrograde vesicle-mediated transport, Golgi to ER|Golgi organization|Golgi transport complex|Golgi vesicle prefusion complex stabilization
DNM1	515.706	731.217	300.195	0.410532	-1.28443	8.40917e-05	0.000751764	Down	2.27483	1.63338	2.3985	5.91512	5.37176	3.0567	GeneID:101108737	dynamin 1	GO:0001917,GO:0002031,GO:0003723,GO:0003924,GO:0005525,GO:0005634,GO:0005654,GO:0005737,GO:0005794,GO:0005874,GO:0005886,GO:0006897,GO:0006898,GO:0007032,GO:0008017,GO:0008021,GO:0008022,GO:0014069,GO:0016020,GO:0016185,GO:0017124,GO:0019901,GO:0030117,GO:0030424,GO:0031410,GO:0031623,GO:0031749,GO:0042802,GO:0043196,GO:0043197,GO:0043209,GO:0044327,GO:0044877,GO:0045202,GO:0045211,GO:0048013,GO:…	photoreceptor inner segment|G protein-coupled receptor internalization|RNA binding|GTPase activity|GTP binding|nucleus|nucleoplasm|cytoplasm|Golgi apparatus|microtubule|plasma membrane|endocytosis|receptor-mediated endocytosis|endosome organization|microtubule binding|synaptic vesicle|protein C-terminus binding|postsynaptic density|membrane|synaptic vesicle budding from presynaptic endocytic zone…	oas04072,oas04144,oas04721,oas04961,oas05100	Phospholipase D signaling pathway|Endocytosis|Synaptic vesicle cycle|Endocrine and other factor-regulated calcium reabsorption|Bacterial invasion of epithelial cells
DOCK2	53.3968	90.6811	16.1125	0.177718	-2.49234	0.00325551	0.017104	Down	0.0999303	0.0649825	0.0570578	0.54654	0.550855	0.0708843	GeneID:101104011	dedicator of cytokinesis 2	GO:0001766,GO:0001768,GO:0001771,GO:0002277,GO:0005096,GO:0005576,GO:0005829,GO:0005856,GO:0006935,GO:0007264,GO:0016020,GO:0030036,GO:0030676,GO:0035580,GO:0042608,GO:0043312,GO:0044351,GO:0045059,GO:0045060,GO:0046633,GO:0050690,GO:0050766,GO:0070062	membrane raft polarization|establishment of T cell polarity|immunological synapse formation|myeloid dendritic cell activation involved in immune response|GTPase activator activity|extracellular region|cytosol|cytoskeleton|chemotaxis|small GTPase mediated signal transduction|membrane|actin cytoskeleton organization|Rac guanyl-nucleotide exchange factor activity|specific granule lumen|T cell recept…	oas04062,oas04666	Chemokine signaling pathway|Fc gamma R-mediated phagocytosis
DOCK3	11.5326	16.4384	6.6268	0.403595	-1.30902	0.0440974	0.132487	Down	0.0312749	0.0218288	0.0126374	0.0548198	0.0524322	0.0446461	GeneID:101114650	dedicator of cytokinesis 3	GO:0005829,GO:0007264,GO:0017124,GO:0030676,GO:1903997	cytosol|small GTPase mediated signal transduction|SH3 domain binding|Rac guanyl-nucleotide exchange factor activity|positive regulation of non-membrane spanning protein tyrosine kinase activity
DQX1	106.876	147.629	66.1232	0.447945	-1.15861	1.34449e-06	2.01801e-05	Down	0.693505	0.474878	0.582402	1.29228	1.40955	0.945703	GeneID:101119457	DEAQ-box RNA dependent ATPase 1	GO:0003723,GO:0005524,GO:0005634,GO:0034459	RNA binding|ATP binding|nucleus|ATP-dependent 3'-5' RNA helicase activity
DUOXA1	2.22426	0.348703	4.09982	10.9138	3.44808	0.0496886	0.144623	Up	0.0750249	0.062339	0.0252631	0	0	0.0127501	GeneID:101115034	dual oxidase maturation factor 1	GO:0005789,GO:0005886,GO:0015031,GO:0016021,GO:0042743,GO:0045666,GO:0050727,GO:2000379,GO:2000609	endoplasmic reticulum membrane|plasma membrane|protein transport|integral component of membrane|hydrogen peroxide metabolic process|positive regulation of neuron differentiation|regulation of inflammatory response|positive regulation of reactive oxygen species metabolic process|regulation of thyroid hormone generation
DUSP2	20.5614	32.5502	8.5725	0.263017	-1.92677	0.000510501	0.00359818	Down	0.109095	0.0932381	0.220413	0.433873	0.751184	0.317831	GeneID:101115699	dual specificity phosphatase 2	GO:0000188,GO:0004725,GO:0005634,GO:0005737,GO:0006470,GO:0008138,GO:0008330,GO:0017017,GO:0031965,GO:0051019	inactivation of MAPK activity|protein tyrosine phosphatase activity|nucleus|cytoplasm|protein dephosphorylation|protein tyrosine/serine/threonine phosphatase activity|protein tyrosine/threonine phosphatase activity|MAP kinase tyrosine/serine/threonine phosphatase activity|nuclear membrane|mitogen-activated protein kinase binding	oas04010	MAPK signaling pathway
E2F7	22.0807	12.576	31.5853	2.51133	1.32845	0.0122391	0.0493824	Up	0.166479	0.18905	0.107445	0.0715221	0.019382	0.0801614	GeneID:101102051	E2F transcription factor 7	GO:0000122,GO:0000978,GO:0000981,GO:0001077,GO:0001078,GO:0001890,GO:0002040,GO:0003700,GO:0003714,GO:0008134,GO:0008285,GO:0016607,GO:0030330,GO:0032466,GO:0032877,GO:0042802,GO:0043565,GO:0045944,GO:0051726,GO:0060707,GO:0060718,GO:0070365,GO:0071930,GO:0090575,GO:2000134	negative regulation of transcription by RNA polymerase II|RNA polymerase II proximal promoter sequence-specific DNA binding|DNA-binding transcription factor activity, RNA polymerase II-specific|proximal promoter DNA-binding transcription activator activity, RNA polymerase II-specific|proximal promoter DNA-binding transcription repressor activity, RNA polymerase II-specific|placenta development|sp…
E2F8	3.80983	0.697407	6.92225	9.91534	3.30966	0.0427919	0.129983	Up	0.0384217	0.10216	0	0	0	0.0130592	GeneID:101115742	E2F transcription factor 8	GO:0000122,GO:0000978,GO:0000981,GO:0001077,GO:0001078,GO:0001890,GO:0002040,GO:0003700,GO:0003714,GO:0005730,GO:0005829,GO:0008134,GO:0008283,GO:0032466,GO:0032877,GO:0033301,GO:0042803,GO:0043565,GO:0045944,GO:0051726,GO:0060707,GO:0060718,GO:0070365,GO:0090575	negative regulation of transcription by RNA polymerase II|RNA polymerase II proximal promoter sequence-specific DNA binding|DNA-binding transcription factor activity, RNA polymerase II-specific|proximal promoter DNA-binding transcription activator activity, RNA polymerase II-specific|proximal promoter DNA-binding transcription repressor activity, RNA polymerase II-specific|placenta development|sp…
EBF4	110.306	150.415	70.1975	0.466816	-1.09907	2.10999e-06	2.97884e-05	Down	0.783433	0.635824	0.607364	1.54981	1.45087	1.04964	GeneID:105606246	EBF family member 4	GO:0000981,GO:0001077,GO:0003677,GO:0005634,GO:0007275,GO:0045944,GO:0046872,GO:0046983	DNA-binding transcription factor activity, RNA polymerase II-specific|proximal promoter DNA-binding transcription activator activity, RNA polymerase II-specific|DNA binding|nucleus|multicellular organism development|positive regulation of transcription by RNA polymerase II|metal ion binding|protein dimerization activity
ECT2	116.673	69.2591	164.087	2.36957	1.24463	2.66213e-06	3.61517e-05	Up	0.870303	1.61064	0.945774	0.373897	0.545766	0.430266	GeneID:101113294	epithelial cell transforming 2
EEF1A2	984.66	516.19	1453.13	2.81526	1.49327	1.51506e-44	1.96393e-41	Up	24.9375	21.6716	20.4268	8.18058	7.24554	6.76893	GeneID:101109898	eukaryotic translation elongation factor 1 alpha 2	GO:0003746,GO:0003924,GO:0005525,GO:0005634,GO:0005853,GO:0006412,GO:0006414,GO:0019901,GO:0043065,GO:0043209,GO:0045202,GO:0090218	translation elongation factor activity|GTPase activity|GTP binding|nucleus|eukaryotic translation elongation factor 1 complex|translation|translational elongation|protein kinase binding|positive regulation of apoptotic process|myelin sheath|synapse|positive regulation of lipid kinase activity	oas03013,oas05134	RNA transport|Legionellosis
EGLN3	358.131	605.211	111.052	0.183495	-2.44619	4.90791e-05	0.000468734	Down	1.27551	1.09155	1.16676	8.22231	7.85058	1.93554	GeneID:101117367	egl-9 family hypoxia inducible factor 3	GO:0001666,GO:0005506,GO:0005634,GO:0005654,GO:0005737,GO:0005829,GO:0006915,GO:0006919,GO:0006974,GO:0016706,GO:0018126,GO:0018401,GO:0031418,GO:0031545,GO:0042127,GO:0043523,GO:0061418	response to hypoxia|iron ion binding|nucleus|nucleoplasm|cytoplasm|cytosol|apoptotic process|activation of cysteine-type endopeptidase activity involved in apoptotic process|cellular response to DNA damage stimulus|oxidoreductase activity, acting on paired donors, with incorporation or reduction of molecular oxygen, 2-oxoglutarate as one donor, and incorporation of one atom each of oxygen into bo…	oas04066,oas05200,oas05211	HIF-1 signaling pathway|Pathways in cancer|Renal cell carcinoma
ELN	36.338	52.4427	20.2333	0.385928	-1.3736	0.00025344	0.001978	Down	0.175029	0.190385	0.144664	0.483984	0.325112	0.421842	GeneID:101111152	elastin	GO:0005201,GO:0062023,GO:0071953	extracellular matrix structural constituent|collagen-containing extracellular matrix|elastic fiber	oas04974	Protein digestion and absorption
EMID1	5.8326	9.44015	2.22505	0.235128	-2.08848	0.0293484	0.097095	Down	0.0101112	0.0201637	0.040857	0.0938295	0.0847572	0.103101	GeneID:101120697	EMI domain containing 1	GO:0005581,GO:0005783,GO:0005794,GO:0010811,GO:0031012	collagen trimer|endoplasmic reticulum|Golgi apparatus|positive regulation of cell-substrate adhesion|extracellular matrix
EMILIN2	600.99	354.664	847.316	2.38907	1.25645	4.15469e-23	7.59509e-21	Up	4.81792	5.7997	5.62518	2.38398	2.188	1.77128	GeneID:101123002	elastin microfibril interfacer 2	GO:0005576,GO:0005581,GO:0007155,GO:0010811,GO:0030023,GO:0031012,GO:0062023	extracellular region|collagen trimer|cell adhesion|positive regulation of cell-substrate adhesion|extracellular matrix constituent conferring elasticity|extracellular matrix|collagen-containing extracellular matrix
EML6	15.9384	22.3818	9.49504	0.424185	-1.23724	0.0246157	0.0848298	Down	0.0232469	0.0430472	0.0335481	0.0616356	0.0800344	0.0778851	GeneID:101101879	EMAP like 6	GO:0005737,GO:0005874,GO:0008017,GO:0015630	cytoplasm|microtubule|microtubule binding|microtubule cytoskeleton
EMP2	763.213	1088.16	438.265	0.402759	-1.31201	1.83679e-29	6.8923e-27	Down	2.22558	2.09739	2.19608	5.58196	5.33306	4.18443	GeneID:101107656	epithelial membrane protein 2	GO:0000139,GO:0001765,GO:0001913,GO:0001952,GO:0003093,GO:0005634,GO:0005737,GO:0005794,GO:0005829,GO:0005886,GO:0007015,GO:0007155,GO:0007160,GO:0007566,GO:0008219,GO:0008284,GO:0009986,GO:0010594,GO:0016021,GO:0016324,GO:0016477,GO:0019901,GO:0032060,GO:0032147,GO:0034394,GO:0043534,GO:0043549,GO:0045022,GO:0045121,GO:0045177,GO:0045765,GO:0070252,GO:0072659,GO:2001046,GO:2001212	Golgi membrane|membrane raft assembly|T cell mediated cytotoxicity|regulation of cell-matrix adhesion|regulation of glomerular filtration|nucleus|cytoplasm|Golgi apparatus|cytosol|plasma membrane|actin filament organization|cell adhesion|cell-matrix adhesion|embryo implantation|cell death|positive regulation of cell proliferation|cell surface|regulation of endothelial cell migration|integral comp…
ENHO	16.7362	9.78294	23.6896	2.42147	1.27588	0.0302332	0.0994453	Up	0.711457	1.00497	0.509083	0.152827	0.217429	0.483635	GeneID:101121999	energy homeostasis associated	GO:0005179,GO:0005576,GO:0005886,GO:0008286,GO:0008610,GO:0010604,GO:0030073,GO:0042593,GO:0043170,GO:0045747,GO:0046889,GO:0051353,GO:1905636	hormone activity|extracellular region|plasma membrane|insulin receptor signaling pathway|lipid biosynthetic process|positive regulation of macromolecule metabolic process|insulin secretion|glucose homeostasis|macromolecule metabolic process|positive regulation of Notch signaling pathway|positive regulation of lipid biosynthetic process|positive regulation of oxidoreductase activity|positive regul…
EPAS1	33016.9	46095	19938.8	0.432559	-1.20903	2.16026e-37	1.92519e-34	Down	107.678	93.9045	106.822	239.237	243.441	182.563	GeneID:443286	endothelial PAS domain protein 1	GO:0000981,GO:0001077,GO:0001525,GO:0001666,GO:0001892,GO:0001974,GO:0002027,GO:0003677,GO:0005634,GO:0005654,GO:0005667,GO:0005829,GO:0006357,GO:0006366,GO:0007005,GO:0007165,GO:0007601,GO:0008134,GO:0016607,GO:0030218,GO:0030324,GO:0035035,GO:0042415,GO:0043129,GO:0043565,GO:0043619,GO:0043687,GO:0045944,GO:0046982,GO:0048469,GO:0048625,GO:0055072,GO:0061418,GO:0071456,GO:0120162	DNA-binding transcription factor activity, RNA polymerase II-specific|proximal promoter DNA-binding transcription activator activity, RNA polymerase II-specific|angiogenesis|response to hypoxia|embryonic placenta development|blood vessel remodeling|regulation of heart rate|DNA binding|nucleus|nucleoplasm|transcription factor complex|cytosol|regulation of transcription by RNA polymerase II|transcr…	oas05200,oas05211	Pathways in cancer|Renal cell carcinoma
EPHA1	12.1617	6.29687	18.0266	2.86356	1.51781	0.0167747	0.0633601	Up	0.150913	0.183914	0.143981	0.051868	0.0614944	0.042745	GeneID:101115703	EPH receptor A1			oas04360	Axon guidance
EPHA7	69.5372	20.2588	118.816	5.86257	2.55153	8.76942e-13	4.16811e-11	Up	0.473219	0.468473	0.331213	0.0557631	0.0318756	0.113739	GeneID:101107288	EPH receptor A7			oas04360	Axon guidance
EPSTI1	41.9232	26.9245	56.9219	2.11427	1.08016	0.0040279	0.0203306	Up	1.13567	1.02943	0.938654	0.230646	0.540895	0.596553	GeneID:101123642	epithelial stromal interaction 1
ERCC6L	20.5701	7.3482	33.7919	4.60114	2.20199	0.000220325	0.0017502	Up	0.149811	0.402664	0.144757	0.0335798	0.0682493	0.0398499	GeneID:101108989	ERCC excision repair 6 like, spindle assembly checkpoint helicase	GO:0000777,GO:0003677,GO:0004386,GO:0005524,GO:0007049,GO:0015616,GO:0051301	condensed chromosome kinetochore|DNA binding|helicase activity|ATP binding|cell cycle|DNA translocase activity|cell division
ESCO2	9.02879	3.84797	14.2096	3.69409	1.88522	0.0462958	0.137127	Up	0.0153192	0.267306	0.061901	0.0157953	0.040129	0.0312411	GeneID:101114418	establishment of sister chromatid cohesion N-acetyltransferase 2	GO:0000785,GO:0001741,GO:0002244,GO:0004468,GO:0005634,GO:0005654,GO:0005694,GO:0005794,GO:0006275,GO:0006302,GO:0007062,GO:0008080,GO:0010369,GO:0016407,GO:0030054,GO:0031618,GO:0034421,GO:0035861,GO:0046872,GO:0071168	chromatin|XY body|hematopoietic progenitor cell differentiation|lysine N-acetyltransferase activity, acting on acetyl phosphate as donor|nucleus|nucleoplasm|chromosome|Golgi apparatus|regulation of DNA replication|double-strand break repair|sister chromatid cohesion|N-acetyltransferase activity|chromocenter|acetyltransferase activity|cell junction|nuclear pericentric heterochromatin|post-translat…
ESM1	66.6511	21.3148	111.987	5.25195	2.39285	2.13093e-13	1.13376e-11	Up	2.73555	3.46685	2.86672	0.579931	0.29467	0.729926	GeneID:101117876	endothelial cell specific molecule 1	GO:0001525,GO:0001558,GO:0002040,GO:0005171,GO:0005178,GO:0005520,GO:0005576,GO:0008284,GO:1902204	angiogenesis|regulation of cell growth|sprouting angiogenesis|hepatocyte growth factor receptor binding|integrin binding|insulin-like growth factor binding|extracellular region|positive regulation of cell proliferation|positive regulation of hepatocyte growth factor receptor signaling pathway
ESPL1	58.9974	33.2217	84.7731	2.55186	1.35155	1.9131e-05	0.000206659	Up	0.280735	0.489858	0.337812	0.127703	0.138427	0.138919	GeneID:101105898	extra spindle pole bodies like 1, separase	GO:0000070,GO:0000212,GO:0000281,GO:0003824,GO:0004197,GO:0005634,GO:0005737,GO:0005813,GO:0005829,GO:0006915,GO:0008234,GO:0040001,GO:0045143,GO:0045842,GO:0045875,GO:0051307,GO:0072686	mitotic sister chromatid segregation|meiotic spindle organization|mitotic cytokinesis|catalytic activity|cysteine-type endopeptidase activity|nucleus|cytoplasm|centrosome|cytosol|apoptotic process|cysteine-type peptidase activity|establishment of mitotic spindle localization|homologous chromosome segregation|positive regulation of mitotic metaphase/anaphase transition|negative regulation of siste…	oas04110,oas04114,oas05166	Cell cycle|Oocyte meiosis|Human T-cell leukemia virus 1 infection
EVPL	7.54244	12.2424	2.84245	0.232402	-2.10531	0.0166562	0.0629808	Down	0.0124637	0.0165699	0.00839376	0.0856736	0.0391786	0.0254177	GeneID:101118371	envoplakin	GO:0001533,GO:0005198,GO:0005737,GO:0005829,GO:0008544,GO:0016020,GO:0018149,GO:0019215,GO:0030057,GO:0030216,GO:0030674,GO:0042060,GO:0045104,GO:0045111,GO:0045296,GO:0070062,GO:0070268	cornified envelope|structural molecule activity|cytoplasm|cytosol|epidermis development|membrane|peptide cross-linking|intermediate filament binding|desmosome|keratinocyte differentiation|protein binding, bridging|wound healing|intermediate filament cytoskeleton organization|intermediate filament cytoskeleton|cadherin binding|extracellular exosome|cornification
F8A1	24.3069	14.6879	33.9258	2.30875	1.20711	0.00828405	0.0361009	Up	0.439429	0.500745	0.745128	0.226544	0.230219	0.224037	GeneID:106991990	coagulation factor VIII associated 1	GO:0005634	nucleus
FABP4	70.5113	25.1924	115.83	4.59892	2.2013	1.09246e-13	6.15706e-12	Up	7.90159	8.41733	8.45965	1.88012	2.05215	1.10181	GeneID:100137067	fatty acid binding protein 4, adipocyte	GO:0005324,GO:0005634,GO:0005737,GO:0015909,GO:0036041,GO:0050727	long-chain fatty acid transporter activity|nucleus|cytoplasm|long-chain fatty acid transport|long-chain fatty acid binding|regulation of inflammatory response	oas03320,oas04923	PPAR signaling pathway|Regulation of lipolysis in adipocytes
FAM111B	19.0243	11.5469	26.5017	2.29664	1.19952	0.0413536	0.126891	Up	0.241625	0.502795	0.137962	0.0758236	0.176123	0.107121	GeneID:101109642	family with sequence similarity 111 member B
FAM13C	7.92858	3.84674	12.0104	3.12296	1.64292	0.0392494	0.121797	Up	0.082426	0.109582	0.0693881	0.0354116	0.0215917	0.0210119	GeneID:101119609	family with sequence similarity 13 member C
FAM167A	73.0996	105.309	40.8897	0.388097	-1.36551	9.95632e-06	0.000117135	Down	0.169108	0.26746	0.318098	0.703467	0.702661	0.410275	GeneID:101118417	family with sequence similarity 167 member A
FAM180A	106.013	142.741	69.2856	0.485432	-1.04266	0.000346039	0.00259556	Down	0.525541	0.281313	0.407951	1.02671	0.834696	0.47383	GeneID:101108221	family with sequence similarity 180 member A	GO:0005576	extracellular region
FAM20A	4.98485	8.39075	1.57896	0.188375	-2.40832	0.0260805	0.0887545	Down	0.00393494	0.0117705	0.00397502	0.0486868	0.0206153	0.0280864	GeneID:101108764	FAM20A golgi associated secretory pathway pseudokinase	GO:0001934,GO:0005615,GO:0005623,GO:0005783,GO:0005794,GO:0006468,GO:0009617,GO:0031214,GO:0043539,GO:0044691,GO:0055074,GO:0070062,GO:0070166	positive regulation of protein phosphorylation|extracellular space|cell|endoplasmic reticulum|Golgi apparatus|protein phosphorylation|response to bacterium|biomineral tissue development|protein serine/threonine kinase activator activity|tooth eruption|calcium ion homeostasis|extracellular exosome|enamel mineralization
FAM49A	50.3044	72.7607	27.8481	0.382739	-1.38557	1.70114e-05	0.000186876	Down	0.132036	0.191993	0.161169	0.385731	0.461164	0.336584	GeneID:101122507	family with sequence similarity 49 member A	GO:0005622	intracellular
FAM71A	9.71995	14.7001	4.73979	0.322679	-1.63183	0.0280878	0.0937949	Down	0.0998544	0.0568938	0.057641	0.235333	0.283992	0.101819	GeneID:101115812	family with sequence similarity 71 member A	GO:0005634	nucleus
FAM71E2	287.63	523.368	51.8925	0.0991517	-3.33422	5.39169e-06	6.77358e-05	Down	0.733026	0.380889	0.584051	7.34518	7.30209	1.36856	GeneID:101120774	family with sequence similarity 71 member E2
FAM83B	124.933	74.1137	175.752	2.37145	1.24577	8.35689e-06	0.000100728	Up	0.499132	0.868437	0.497449	0.158884	0.245703	0.327915	GeneID:101108170	family with sequence similarity 83 member B	GO:0005154,GO:0005737,GO:0007173,GO:0008283,GO:0016020,GO:0019901,GO:0036312,GO:0036313	epidermal growth factor receptor binding|cytoplasm|epidermal growth factor receptor signaling pathway|cell proliferation|membrane|protein kinase binding|phosphatidylinositol 3-kinase regulatory subunit binding|phosphatidylinositol 3-kinase catalytic subunit binding
FAM83C	27.3349	42.0085	12.6614	0.301408	-1.73021	0.000479084	0.00341051	Down	0.0988442	0.0985568	0.107532	0.329268	0.478015	0.139553	GeneID:101119841	family with sequence similarity 83 member C	GO:0019901	protein kinase binding
FANCD2	165.609	63.6445	267.574	4.20434	2.07188	3.72882e-20	4.92307e-18	Up	1.22987	2.0604	1.4047	0.337017	0.34829	0.355884	GeneID:101123503	FA complementation group D2			oas03460	Fanconi anemia pathway
FBLN1	14593.1	20551.4	8634.72	0.420148	-1.25103	7.89141e-31	3.62979e-28	Down	70.9761	65.6597	83.7305	179.557	178.553	131.417	GeneID:100037704	fibulin 1	GO:0005509,GO:0005576,GO:0016504,GO:0030198	calcium ion binding|extracellular region|peptidase activator activity|extracellular matrix organization
FBN2	187.322	273.894	100.751	0.368014	-1.44217	2.80909e-10	8.86169e-09	Down	0.3864	0.212396	0.192666	0.687001	0.755245	0.563219	GeneID:101104991	fibrillin 2	GO:0001527,GO:0005201,GO:0005509,GO:0005576,GO:0030023,GO:0030198,GO:0030326,GO:0030501,GO:0031012,GO:0035583,GO:0043010,GO:0045669,GO:0048048,GO:0060346,GO:0062023	microfibril|extracellular matrix structural constituent|calcium ion binding|extracellular region|extracellular matrix constituent conferring elasticity|extracellular matrix organization|embryonic limb morphogenesis|positive regulation of bone mineralization|extracellular matrix|sequestering of TGFbeta in extracellular matrix|camera-type eye development|positive regulation of osteoblast differenti…
FBP1	6.56748	11.5505	1.58444	0.137074	-2.86697	0.00491697	0.0238798	Down	0.0198574	0.0395993	0.0401193	0.307118	0.291294	0.0809919	GeneID:101113198	fructose-bisphosphatase 1	GO:0005737,GO:0005829,GO:0006002,GO:0006094,GO:0006111,GO:0016208,GO:0016311,GO:0030308,GO:0035690,GO:0042132,GO:0045820,GO:0046580,GO:0046872,GO:0048029,GO:0051289,GO:0071286	cytoplasm|cytosol|fructose 6-phosphate metabolic process|gluconeogenesis|regulation of gluconeogenesis|AMP binding|dephosphorylation|negative regulation of cell growth|cellular response to drug|fructose 1,6-bisphosphate 1-phosphatase activity|negative regulation of glycolytic process|negative regulation of Ras protein signal transduction|metal ion binding|monosaccharide binding|protein homotetram…	oas00010,oas00030,oas00051,oas04152,oas04910	Glycolysis / Gluconeogenesis|Pentose phosphate pathway|Fructose and mannose metabolism|AMPK signaling pathway|Insulin signaling pathway
FER1L6	51.2553	26.2335	76.2772	2.90772	1.53989	1.32521e-06	1.99117e-05	Up	0.366704	0.294192	0.357666	0.112996	0.119246	0.0945539	GeneID:101106949	fer-1 like family member 6	GO:0009617,GO:0016021	response to bacterium|integral component of membrane
FGD3	16.4396	22.7455	10.1337	0.445449	-1.16667	0.0350303	0.11152	Down	0.0762923	0.0760705	0.0924835	0.196659	0.215837	0.101131	GeneID:101107664	FYVE, RhoGEF and PH domain containing 3	GO:0001726,GO:0005085,GO:0005089,GO:0005737,GO:0005794,GO:0005829,GO:0005856,GO:0007010,GO:0007186,GO:0008360,GO:0030027,GO:0030036,GO:0031267,GO:0035023,GO:0043065,GO:0043087,GO:0046847,GO:0046872,GO:0051056	ruffle|guanyl-nucleotide exchange factor activity|Rho guanyl-nucleotide exchange factor activity|cytoplasm|Golgi apparatus|cytosol|cytoskeleton|cytoskeleton organization|G protein-coupled receptor signaling pathway|regulation of cell shape|lamellipodium|actin cytoskeleton organization|small GTPase binding|regulation of Rho protein signal transduction|positive regulation of apoptotic process|regul…	oas04810	Regulation of actin cytoskeleton
FGD4	163.805	88.1081	239.501	2.71808	1.44259	4.22703e-15	2.89775e-13	Up	0.812813	0.764226	0.768019	0.251741	0.249349	0.302528	GeneID:101105233	FYVE, RhoGEF and PH domain containing 4	GO:0001726,GO:0003779,GO:0005085,GO:0005089,GO:0005737,GO:0005794,GO:0005829,GO:0005856,GO:0007010,GO:0007186,GO:0008360,GO:0030027,GO:0030036,GO:0030175,GO:0031267,GO:0035023,GO:0043065,GO:0043087,GO:0046847,GO:0046872,GO:0051056	ruffle|actin binding|guanyl-nucleotide exchange factor activity|Rho guanyl-nucleotide exchange factor activity|cytoplasm|Golgi apparatus|cytosol|cytoskeleton|cytoskeleton organization|G protein-coupled receptor signaling pathway|regulation of cell shape|lamellipodium|actin cytoskeleton organization|filopodium|small GTPase binding|regulation of Rho protein signal transduction|positive regulation o…
FGF23	2.27668	4.55335	0	0.0383556	-4.70442	0.0157323	0.0603678	Down	0	0	0	0.0499412	0.0592101	0	GeneID:101112475	fibroblast growth factor 23			oas04010,oas04014,oas04015,oas04151,oas04810,oas04928,oas05200,oas05218,oas05224,oas05226	MAPK signaling pathway|Ras signaling pathway|Rap1 signaling pathway|PI3K-Akt signaling pathway|Regulation of actin cytoskeleton|Parathyroid hormone synthesis, secretion and action|Pathways in cancer|Melanoma|Breast cancer|Gastric cancer
FNDC1	20.6516	28.3166	12.9865	0.458391	-1.12535	0.0201954	0.0730324	Down	0.0573328	0.0449163	0.0661908	0.0971171	0.102984	0.141976	GeneID:101110947	fibronectin type III domain containing 1	GO:0005576,GO:0016607	extracellular region|nuclear speck
FOSB	2769.45	3753.47	1785.43	0.475678	-1.07194	1.39527e-06	2.08545e-05	Down	10.1296	9.93842	8.61442	16.6495	15.5172	23.9457	GeneID:101117101	FosB proto-oncogene, AP-1 transcription factor subunit			oas04380,oas04657,oas05030,oas05031,oas05034	Osteoclast differentiation|IL-17 signaling pathway|Cocaine addiction|Amphetamine addiction|Alcoholism
FOXM1	11.4593	1.74544	21.1732	12.118	3.59908	9.03837e-05	0.000800982	Up	0.0918107	0.297517	0.123661	0.0157774	0	0.0234042	GeneID:101113491	forkhead box M1	GO:0000086,GO:0003677,GO:0003700,GO:0005634,GO:0006281,GO:0034698,GO:0043565,GO:0045944,GO:0051591	G2/M transition of mitotic cell cycle|DNA binding|DNA-binding transcription factor activity|nucleus|DNA repair|response to gonadotropin|sequence-specific DNA binding|positive regulation of transcription by RNA polymerase II|response to cAMP	oas04218	Cellular senescence
FRMD7	171.642	97.1968	246.087	2.53178	1.34015	2.25007e-13	1.17955e-11	Up	1.87041	1.86497	1.70616	0.597272	0.628901	0.77569	GeneID:101111523	FERM domain containing 7	GO:0005615,GO:0005856,GO:0010592,GO:0010975,GO:0030426,GO:0032091,GO:0043005,GO:0043025,GO:0051057,GO:0051497	extracellular space|cytoskeleton|positive regulation of lamellipodium assembly|regulation of neuron projection development|growth cone|negative regulation of protein binding|neuron projection|neuronal cell body|positive regulation of small GTPase mediated signal transduction|negative regulation of stress fiber assembly
FRRS1	20.2152	12.5855	27.8448	2.21214	1.14544	0.0175067	0.0654675	Up	0.298604	0.308003	0.301646	0.127401	0.10789	0.146989	GeneID:101111238	ferric chelate reductase 1	GO:0016021,GO:0016491,GO:0046872	integral component of membrane|oxidoreductase activity|metal ion binding
FRZB	45.2946	74.1109	16.4783	0.222167	-2.17028	3.16052e-09	8.1641e-08	Down	0.113062	0.178494	0.199874	0.709171	0.552848	0.797395	GeneID:101118419	frizzled related protein	GO:0005615,GO:0005737,GO:0008285,GO:0010721,GO:0014033,GO:0017147,GO:0030178,GO:0030308,GO:0035567,GO:0043065,GO:0045600,GO:0060029,GO:0060070,GO:0061037,GO:0061053,GO:0070367,GO:0090090,GO:0090103	extracellular space|cytoplasm|negative regulation of cell proliferation|negative regulation of cell development|neural crest cell differentiation|Wnt-protein binding|negative regulation of Wnt signaling pathway|negative regulation of cell growth|non-canonical Wnt signaling pathway|positive regulation of apoptotic process|positive regulation of fat cell differentiation|convergent extension involve…
FSIP1	50.717	28.6602	72.7737	2.53862	1.34405	4.43092e-05	0.000429507	Up	0.454713	0.509289	0.471931	0.141296	0.143589	0.241356	GeneID:101106849	fibrous sheath interacting protein 1
FZD2	93.3454	59.4208	127.27	2.14126	1.09846	1.61235e-05	0.000177945	Up	1.0591	1.01572	1.18423	0.383457	0.39815	0.634771	GeneID:780481	frizzled class receptor 2	GO:0003149,GO:0003150,GO:0003151,GO:0004930,GO:0005737,GO:0005886,GO:0007199,GO:0007204,GO:0007223,GO:0007267,GO:0007608,GO:0016021,GO:0017147,GO:0030165,GO:0030855,GO:0035567,GO:0042802,GO:0042813,GO:0045745,GO:0045893,GO:0046982,GO:0051091,GO:0060022,GO:0060070,GO:0060119,GO:0060412,GO:0090103,GO:0090179	membranous septum morphogenesis|muscular septum morphogenesis|outflow tract morphogenesis|G protein-coupled receptor activity|cytoplasm|plasma membrane|G protein-coupled receptor signaling pathway coupled to cGMP nucleotide second messenger|positive regulation of cytosolic calcium ion concentration|Wnt signaling pathway, calcium modulating pathway|cell-cell signaling|sensory perception of smell|i…	oas04150,oas04310,oas04390,oas04550,oas04916,oas04934,oas05165,oas05200,oas05205,oas05217,oas05224,oas05225,oas05226	mTOR signaling pathway|Wnt signaling pathway|Hippo signaling pathway|Signaling pathways regulating pluripotency of stem cells|Melanogenesis|Cushing syndrome|Human papillomavirus infection|Pathways in cancer|Proteoglycans in cancer|Basal cell carcinoma|Breast cancer|Hepatocellular carcinoma|Gastric cancer
FZD5	39.8352	26.2209	53.4495	2.03841	1.02744	0.00739592	0.0329558	Up	0.240242	0.274387	0.22504	0.0585494	0.123576	0.155889	GeneID:101118762	frizzled class receptor 5	GO:0000139,GO:0000578,GO:0001525,GO:0001540,GO:0002726,GO:0004930,GO:0005886,GO:0005887,GO:0005923,GO:0007223,GO:0007416,GO:0008285,GO:0008289,GO:0008595,GO:0009986,GO:0017147,GO:0019901,GO:0030182,GO:0030424,GO:0030425,GO:0030669,GO:0031077,GO:0031625,GO:0031901,GO:0032729,GO:0033077,GO:0035567,GO:0042813,GO:0043204,GO:0043507,GO:0044877,GO:0045202,GO:0045944,GO:0048469,GO:0048471,GO:0048596,GO:…	Golgi membrane|embryonic axis specification|angiogenesis|amyloid-beta binding|positive regulation of T cell cytokine production|G protein-coupled receptor activity|plasma membrane|integral component of plasma membrane|bicellular tight junction|Wnt signaling pathway, calcium modulating pathway|synapse assembly|negative regulation of cell proliferation|lipid binding|anterior/posterior axis specific…	oas04150,oas04310,oas04390,oas04550,oas04916,oas04934,oas05165,oas05200,oas05205,oas05217,oas05224,oas05225,oas05226	mTOR signaling pathway|Wnt signaling pathway|Hippo signaling pathway|Signaling pathways regulating pluripotency of stem cells|Melanogenesis|Cushing syndrome|Human papillomavirus infection|Pathways in cancer|Proteoglycans in cancer|Basal cell carcinoma|Breast cancer|Hepatocellular carcinoma|Gastric cancer
GABBR2	20.1633	8.736	31.5905	3.61585	1.85434	0.00149664	0.00889934	Up	0.232341	0.154444	0.130394	0.0106472	0.0432799	0.0789706	GeneID:101103544	gamma-aminobutyric acid type B receptor subunit 2	GO:0004965,GO:0005737,GO:0005886,GO:0005887,GO:0007186,GO:0007194,GO:0007214,GO:0007268,GO:0030054,GO:0038039,GO:0043005,GO:0045211,GO:0046982,GO:1902710	G protein-coupled GABA receptor activity|cytoplasm|plasma membrane|integral component of plasma membrane|G protein-coupled receptor signaling pathway|negative regulation of adenylate cyclase activity|gamma-aminobutyric acid signaling pathway|chemical synaptic transmission|cell junction|G protein-coupled receptor heterodimeric complex|neuron projection|postsynaptic membrane|protein heterodimerizat…	oas04024,oas04080,oas04727,oas04742,oas04915,oas05032	cAMP signaling pathway|Neuroactive ligand-receptor interaction|GABAergic synapse|Taste transduction|Estrogen signaling pathway|Morphine addiction
GABRB1	18.0002	6.6372	29.3632	4.42323	2.1451	0.0003447	0.00259147	Up	0.163974	0.142536	0.0849461	0.0346812	0.00881097	0.0385846	GeneID:101122358	gamma-aminobutyric acid type A receptor beta1 subunit	GO:0004890,GO:0005887,GO:0006811,GO:0007165,GO:0007214,GO:0007268,GO:0015276,GO:0022851,GO:0030054,GO:0034220,GO:0034707,GO:0042391,GO:0043005,GO:0045202,GO:0045211,GO:0050877,GO:0071420,GO:1902711	GABA-A receptor activity|integral component of plasma membrane|ion transport|signal transduction|gamma-aminobutyric acid signaling pathway|chemical synaptic transmission|ligand-gated ion channel activity|GABA-gated chloride ion channel activity|cell junction|ion transmembrane transport|chloride channel complex|regulation of membrane potential|neuron projection|synapse|postsynaptic membrane|nervou…	oas04080,oas04723,oas04726,oas04727,oas05032,oas05033	Neuroactive ligand-receptor interaction|Retrograde endocannabinoid signaling|Serotonergic synapse|GABAergic synapse|Morphine addiction|Nicotine addiction
GABRB2	20.8221	31.5008	10.1434	0.32183	-1.63563	0.00252312	0.0137527	Down	0.0419345	0.0209063	0.0494221	0.108095	0.15745	0.0605759	GeneID:100913155	gamma-aminobutyric acid type A receptor beta2 subunit	GO:0004890,GO:0005254,GO:0005887,GO:0007165,GO:0007214,GO:0007268,GO:0007605,GO:0030054,GO:0030659,GO:0034220,GO:0034707,GO:0042391,GO:0043005,GO:0043524,GO:0045202,GO:0050877,GO:0060119,GO:0060384,GO:0071420,GO:0090102,GO:0098982,GO:0099060,GO:1902476,GO:1902711,GO:1904315	GABA-A receptor activity|chloride channel activity|integral component of plasma membrane|signal transduction|gamma-aminobutyric acid signaling pathway|chemical synaptic transmission|sensory perception of sound|cell junction|cytoplasmic vesicle membrane|ion transmembrane transport|chloride channel complex|regulation of membrane potential|neuron projection|negative regulation of neuron apoptotic pr…	oas04080,oas04723,oas04726,oas04727,oas05032,oas05033	Neuroactive ligand-receptor interaction|Retrograde endocannabinoid signaling|Serotonergic synapse|GABAergic synapse|Morphine addiction|Nicotine addiction
GADD45A	1475.06	2001.23	948.894	0.474183	-1.07648	2.75138e-35	1.9616e-32	Down	22.5801	20.3169	19.6176	39.039	40.6092	43.2077	GeneID:101115240	growth arrest and DNA damage inducible alpha	GO:0000185,GO:0000979,GO:0005634,GO:0005737,GO:0006469,GO:0007098,GO:0016607,GO:0019900,GO:0042770,GO:0042803,GO:0043065,GO:0046330,GO:0046982,GO:0047485,GO:0051726,GO:0071260,GO:0071479,GO:0071850,GO:1900745,GO:2000379	activation of MAPKKK activity|RNA polymerase II core promoter sequence-specific DNA binding|nucleus|cytoplasm|negative regulation of protein kinase activity|centrosome cycle|nuclear speck|kinase binding|signal transduction in response to DNA damage|protein homodimerization activity|positive regulation of apoptotic process|positive regulation of JNK cascade|protein heterodimerization activity|prot…	oas04010,oas04068,oas04110,oas04115,oas04210,oas04218,oas05169,oas05200,oas05202,oas05210,oas05212,oas05213,oas05214,oas05216,oas05217,oas05218,oas05220,oas05222,oas05223,oas05224,oas05225,oas05226	MAPK signaling pathway|FoxO signaling pathway|Cell cycle|p53 signaling pathway|Apoptosis|Cellular senescence|Epstein-Barr virus infection|Pathways in cancer|Transcriptional misregulation in cancer|Colorectal cancer|Pancreatic cancer|Endometrial cancer|Glioma|Thyroid cancer|Basal cell carcinoma|Melanoma|Chronic myeloid leukemia|Small cell lung cancer|Non-small cell lung cancer|Breast cancer|Hepato…
GAL	3.63539	6.64241	0.628364	0.0950537	-3.39511	0.0196207	0.0714068	Down	0.0757987	0	0	0.273541	0.198557	0.270514	GeneID:100037696	galanin and GMAP prepropeptide	GO:0004966,GO:0005184,GO:0005615,GO:0007218,GO:0007399,GO:0010737,GO:0019933,GO:0030141,GO:0031764,GO:0031765,GO:0031766,GO:0043025,GO:0045944,GO:0051464,GO:0051795,GO:1902608,GO:1902891	galanin receptor activity|neuropeptide hormone activity|extracellular space|neuropeptide signaling pathway|nervous system development|protein kinase A signaling|cAMP-mediated signaling|secretory granule|type 1 galanin receptor binding|type 2 galanin receptor binding|type 3 galanin receptor binding|neuronal cell body|positive regulation of transcription by RNA polymerase II|positive regulation of …	oas04080	Neuroactive ligand-receptor interaction
GALNT5	614.805	279.714	949.896	3.3955	1.76363	8.27586e-47	1.31117e-43	Up	4.67767	4.29984	5.29563	1.25223	1.21787	1.44639	GeneID:101113990	polypeptide N-acetylgalactosaminyltransferase 5			oas00512	Mucin type O-glycan biosynthesis
GALNT6	154.611	71.3688	237.854	3.33349	1.73703	2.43797e-17	2.2284e-15	Up	1.45821	1.70841	1.41168	0.444794	0.509308	0.328355	GeneID:101114859	polypeptide N-acetylgalactosaminyltransferase 6	GO:0000139,GO:0004653,GO:0005794,GO:0006486,GO:0016021,GO:0030246,GO:0046872	Golgi membrane|polypeptide N-acetylgalactosaminyltransferase activity|Golgi apparatus|protein glycosylation|integral component of membrane|carbohydrate binding|metal ion binding	oas00512	Mucin type O-glycan biosynthesis
GAS2L3	104.667	66.7922	142.542	2.13456	1.09394	2.12772e-06	2.99794e-05	Up	0.95516	0.838098	0.672667	0.326407	0.371735	0.378449	GeneID:101105994	growth arrest specific 2 like 3	GO:0000226,GO:0003779,GO:0005737,GO:0005874,GO:0008017,GO:0015629,GO:0015630,GO:0030036	microtubule cytoskeleton organization|actin binding|cytoplasm|microtubule|microtubule binding|actin cytoskeleton|microtubule cytoskeleton|actin cytoskeleton organization
GAS6	844.052	1274.95	413.159	0.324075	-1.6256	7.08851e-61	2.0215e-57	Down	5.52747	4.83416	4.96862	15.2262	14.0376	14.8189	GeneID:101120928	growth arrest specific 6			oas01521	EGFR tyrosine kinase inhibitor resistance
GCM1	23.6619	35.0063	12.3175	0.352108	-1.50591	0.00848265	0.0367977	Down	0.416697	0.0865596	0.175393	0.572865	0.927817	0.300967	GeneID:101108000	glial cells missing transcription factor 1	GO:0000978,GO:0000981,GO:0001077,GO:0003677,GO:0003700,GO:0005634,GO:0005667,GO:0006355,GO:0006366,GO:0008134,GO:0008270,GO:0009653,GO:0042826,GO:0045944,GO:0060018,GO:0060143,GO:0060670,GO:0060706,GO:0060800	RNA polymerase II proximal promoter sequence-specific DNA binding|DNA-binding transcription factor activity, RNA polymerase II-specific|proximal promoter DNA-binding transcription activator activity, RNA polymerase II-specific|DNA binding|DNA-binding transcription factor activity|nucleus|transcription factor complex|regulation of transcription, DNA-templated|transcription by RNA polymerase II|tra…	oas04928	Parathyroid hormone synthesis, secretion and action
GDF15	285.916	412.168	159.665	0.387397	-1.36811	0.000500105	0.003546	Down	3.54957	4.273	3.12658	11.85	9.72908	4.81115	GeneID:100913168	growth differentiation factor 15			oas04060	Cytokine-cytokine receptor interaction
GGT5	191.501	288.303	94.6986	0.328415	-1.60641	4.89025e-11	1.74553e-09	Down	1.24123	0.68757	1.25388	3.46752	3.59048	1.99042	GeneID:101112423	gamma-glutamyltransferase 5	GO:0000048,GO:0002951,GO:0005886,GO:0006508,GO:0006520,GO:0006536,GO:0006631,GO:0006691,GO:0006749,GO:0006750,GO:0006751,GO:0006954,GO:0016021,GO:0019344,GO:0031226,GO:0036374,GO:0102953,GO:0103068,GO:1901750	peptidyltransferase activity|leukotriene-C(4) hydrolase|plasma membrane|proteolysis|cellular amino acid metabolic process|glutamate metabolic process|fatty acid metabolic process|leukotriene metabolic process|glutathione metabolic process|glutathione biosynthetic process|glutathione catabolic process|inflammatory response|integral component of membrane|cysteine biosynthetic process|intrinsic comp…	oas00430,oas00480,oas00590	Taurine and hypotaurine metabolism|Glutathione metabolism|Arachidonic acid metabolism
GIPC3	62.9749	89.2342	36.7157	0.411459	-1.28118	4.50193e-05	0.000435798	Down	0.21878	0.242383	0.245566	0.53262	0.719559	0.353216	GeneID:101117930	GIPC PDZ domain containing family member 3
GJC2	45.0225	65.0517	24.9934	0.384236	-1.37994	4.63312e-05	0.00044636	Down	0.131335	0.176502	0.144209	0.435688	0.353009	0.308594	GeneID:101122355	gap junction protein gamma 2	GO:0005922,GO:0007154,GO:0016021	connexin complex|cell communication|integral component of membrane
GLIS3	861.06	1205.51	516.615	0.428528	-1.22254	3.71392e-22	6.08698e-20	Down	1.88552	1.79632	2.04254	4.37878	4.80903	3.28163	GeneID:101111939	GLIS family zinc finger 3	GO:0000122,GO:0000981,GO:0003677,GO:0005634,GO:0006366,GO:0045944,GO:0046872	negative regulation of transcription by RNA polymerase II|DNA-binding transcription factor activity, RNA polymerase II-specific|DNA binding|nucleus|transcription by RNA polymerase II|positive regulation of transcription by RNA polymerase II|metal ion binding
GNG4	498.168	690.553	305.784	0.442873	-1.17504	1.04831e-14	6.73328e-13	Down	2.153	2.03602	1.78856	4.80876	4.65408	3.13262	GeneID:101114927	G protein subunit gamma 4	GO:0003924,GO:0005834,GO:0007186,GO:0030308	GTPase activity|heterotrimeric G-protein complex|G protein-coupled receptor signaling pathway|negative regulation of cell growth	oas04014,oas04062,oas04151,oas04371,oas04713,oas04723,oas04724,oas04725,oas04726,oas04727,oas04728,oas04926,oas05032,oas05034,oas05163,oas05167,oas05170,oas05200	Ras signaling pathway|Chemokine signaling pathway|PI3K-Akt signaling pathway|Apelin signaling pathway|Circadian entrainment|Retrograde endocannabinoid signaling|Glutamatergic synapse|Cholinergic synapse|Serotonergic synapse|GABAergic synapse|Dopaminergic synapse|Relaxin signaling pathway|Morphine addiction|Alcoholism|Human cytomegalovirus infection|Kaposi sarcoma-associated herpesvirus infection|…
GPC3	53.838	87.7485	19.9275	0.22712	-2.13847	1.45666e-10	4.80799e-09	Down	0.302769	0.21736	0.244683	0.899076	0.951733	1.2843	GeneID:101119285	glypican 3	GO:0042074,GO:0045732,GO:0045807,GO:0045879,GO:0046658,GO:0060422,GO:0060828,GO:0060976,GO:0062023,GO:0072111,GO:0072180,GO:0090263,GO:2000050	cell migration involved in gastrulation|positive regulation of protein catabolic process|positive regulation of endocytosis|negative regulation of smoothened signaling pathway|anchored component of plasma membrane|peptidyl-dipeptidase inhibitor activity|regulation of canonical Wnt signaling pathway|coronary vasculature development|collagen-containing extracellular matrix|cell proliferation involv…	oas05205	Proteoglycans in cancer
GPM6A	340.19	457.674	222.706	0.4866	-1.03919	0.0231455	0.0809516	Down	1.57347	1.28256	1.36588	1.83828	1.78034	4.44114	GeneID:101106904	glycoprotein M6A	GO:0001764,GO:0003407,GO:0005886,GO:0007416,GO:0016021,GO:0030175,GO:0043005,GO:0043025,GO:0043197,GO:0044295,GO:0048812,GO:0048863,GO:0051491	neuron migration|neural retina development|plasma membrane|synapse assembly|integral component of membrane|filopodium|neuron projection|neuronal cell body|dendritic spine|axonal growth cone|neuron projection morphogenesis|stem cell differentiation|positive regulation of filopodium assembly
GPR25	19.1884	27.6525	10.7243	0.38826	-1.3649	0.0236022	0.0821438	Down	0.263009	0.429127	0.120767	0.838203	0.876855	0.243802	GeneID:114117307	G protein-coupled receptor 25	GO:0004930,GO:0005886,GO:0005887,GO:0007186	G protein-coupled receptor activity|plasma membrane|integral component of plasma membrane|G protein-coupled receptor signaling pathway
GPR84	104.81	192.189	17.4311	0.0906732	-3.46318	2.48677e-08	5.38677e-07	Down	0.281977	0.281157	0.409472	4.01586	4.81966	1.20401	GeneID:101119970	G protein-coupled receptor 84	GO:0001604,GO:0005887,GO:0007218,GO:0008528	urotensin II receptor activity|integral component of plasma membrane|neuropeptide signaling pathway|G protein-coupled peptide receptor activity
GPX3	318.425	212.074	424.776	2.00288	1.00208	0.0253328	0.0867277	Up	8.25833	6.58064	8.16974	2.3976	2.4365	5.8405	GeneID:101104397	glutathione peroxidase 3	GO:0004602,GO:0005615,GO:0006979,GO:0008430,GO:0051289	glutathione peroxidase activity|extracellular space|response to oxidative stress|selenium binding|protein homotetramerization	oas00480,oas00590,oas04918	Glutathione metabolism|Arachidonic acid metabolism|Thyroid hormone synthesis
GRIK1	12.6333	19.5781	5.68846	0.290694	-1.78243	0.00727762	0.0325609	Down	0.0812455	0.0360042	0.0455963	0.251312	0.113506	0.156483	GeneID:101107319	glutamate ionotropic receptor kainate type subunit 1	GO:0004970,GO:0005234,GO:0005886,GO:0007268,GO:0007399,GO:0008066,GO:0008144,GO:0008328,GO:0015277,GO:0016595,GO:0022843,GO:0030054,GO:0030425,GO:0032229,GO:0032230,GO:0032983,GO:0035235,GO:0035249,GO:0042734,GO:0042803,GO:0043025,GO:0043195,GO:0043235,GO:0045211,GO:0048167,GO:0048172,GO:0050804,GO:0051967,GO:0098978,GO:0099056	ionotropic glutamate receptor activity|extracellularly glutamate-gated ion channel activity|plasma membrane|chemical synaptic transmission|nervous system development|glutamate receptor activity|drug binding|ionotropic glutamate receptor complex|kainate selective glutamate receptor activity|glutamate binding|voltage-gated cation channel activity|cell junction|dendrite|negative regulation of synapt…	oas04080,oas04724	Neuroactive ligand-receptor interaction|Glutamatergic synapse
GRM8	55.3306	78.6933	31.9679	0.406193	-1.29976	2.02179e-05	0.000216934	Down	0.248112	0.24739	0.26583	0.465133	0.677508	0.605649	GeneID:101108742	glutamate metabotropic receptor 8			oas04072,oas04080,oas04724	Phospholipase D signaling pathway|Neuroactive ligand-receptor interaction|Glutamatergic synapse
GSDMB	29.7646	39.895	19.6342	0.492089	-1.02301	0.0265429	0.0899633	Down	0.251559	0.324601	0.343812	0.793391	0.697728	0.256508	GeneID:101105086	gasdermin B
GSG1L	35.5484	65.1051	5.99167	0.0921894	-3.43926	6.97693e-09	1.67764e-07	Down	0.182688	0.109294	0.0553647	1.7518	1.45481	0.316678	GeneID:101120720	GSG1 like	GO:0005886,GO:0030054,GO:0098685,GO:0098978,GO:0099061,GO:0099149,GO:2000311	plasma membrane|cell junction|Schaffer collateral - CA1 synapse|glutamatergic synapse|integral component of postsynaptic density membrane|regulation of postsynaptic neurotransmitter receptor internalization|regulation of AMPA receptor activity
GUCY1A1	255.349	411.535	99.1638	0.240942	-2.05324	1.59845e-06	2.33527e-05	Down	0.32993	0.262544	0.403796	1.60279	1.59223	0.669606	GeneID:101110000	guanylate cyclase 1 soluble subunit alpha 1	GO:0004383,GO:0005525,GO:0008074,GO:0008217,GO:0010750,GO:0020037,GO:0035556,GO:0052565,GO:0060087,GO:0098925,GO:0098978,GO:0098982	guanylate cyclase activity|GTP binding|guanylate cyclase complex, soluble|regulation of blood pressure|positive regulation of nitric oxide mediated signal transduction|heme binding|intracellular signal transduction|response to defense-related host nitric oxide production|relaxation of vascular smooth muscle|retrograde trans-synaptic signaling by nitric oxide, modulating synaptic transmission|glut…	oas00230,oas04022,oas04270,oas04540,oas04611,oas04713,oas04730,oas04921,oas04924,oas04970	Purine metabolism|cGMP-PKG signaling pathway|Vascular smooth muscle contraction|Gap junction|Platelet activation|Circadian entrainment|Long-term depression|Oxytocin signaling pathway|Renin secretion|Salivary secretion
GUCY1B1	1119.65	1577.81	661.502	0.419249	-1.25412	3.90309e-20	5.10589e-18	Down	5.65637	5.97917	6.18658	14.8479	15.2403	9.60117	GeneID:443165	guanylate cyclase 1 soluble subunit beta 1	GO:0004383,GO:0005525,GO:0005737,GO:0006182,GO:0008074,GO:0019934,GO:0020037,GO:0038060,GO:0046872,GO:0048786,GO:0071732,GO:0099555	guanylate cyclase activity|GTP binding|cytoplasm|cGMP biosynthetic process|guanylate cyclase complex, soluble|cGMP-mediated signaling|heme binding|nitric oxide-cGMP-mediated signaling pathway|metal ion binding|presynaptic active zone|cellular response to nitric oxide|trans-synaptic signaling by nitric oxide, modulating synaptic transmission	oas00230,oas04022,oas04270,oas04540,oas04611,oas04713,oas04730,oas04921,oas04924,oas04970	Purine metabolism|cGMP-PKG signaling pathway|Vascular smooth muscle contraction|Gap junction|Platelet activation|Circadian entrainment|Long-term depression|Oxytocin signaling pathway|Renin secretion|Salivary secretion
HCN4	5.63935	2.09428	9.18442	4.38056	2.13112	0.0421393	0.1285	Up	0.0408899	0.040771	0.0504857	0	0.00476054	0.0231635	GeneID:101117337	hyperpolarization activated cyclic nucleotide gated potassium channel 4	GO:0002027,GO:0003254,GO:0005222,GO:0005248,GO:0005249,GO:0005886,GO:0006812,GO:0006936,GO:0008015,GO:0030552,GO:0031226,GO:0034765,GO:0035725,GO:0042391,GO:0042802,GO:0048471,GO:0055117,GO:0071320,GO:0071321,GO:0071805,GO:0086012,GO:0086015,GO:0086041,GO:0086046,GO:0086091,GO:0098719,GO:0098855,GO:0098909,GO:1990573	regulation of heart rate|regulation of membrane depolarization|intracellular cAMP-activated cation channel activity|voltage-gated sodium channel activity|voltage-gated potassium channel activity|plasma membrane|cation transport|muscle contraction|blood circulation|cAMP binding|intrinsic component of plasma membrane|regulation of ion transmembrane transport|sodium ion transmembrane transport|regul…	oas04024,oas04742	cAMP signaling pathway|Taste transduction
HERC6	11.2733	4.19654	18.3501	4.37277	2.12855	0.00275161	0.014789	Up	0.0875103	0.181224	0.122403	0.0277631	0.0282136	0.0274559	GeneID:101103321	HECT and RLD domain containing E3 ubiquitin protein ligase family member 6	GO:0000209,GO:0002244,GO:0004842,GO:0005634,GO:0005829,GO:0009617	protein polyubiquitination|hematopoietic progenitor cell differentiation|ubiquitin-protein transferase activity|nucleus|cytosol|response to bacterium
HIPK4	426.783	578.327	275.24	0.475958	-1.07109	1.57032e-11	6.06807e-10	Down	3.11321	3.0211	2.94508	6.33405	7.15687	4.32107	GeneID:101118810	homeodomain interacting protein kinase 4	GO:0004674,GO:0005524,GO:0005737	protein serine/threonine kinase activity|ATP binding|cytoplasm	oas04218	Cellular senescence
HIVEP3	750.989	448.128	1053.85	2.35153	1.2336	8.29243e-19	9.23764e-17	Up	2.2801	2.74011	2.38399	0.953651	0.776229	1.20092	GeneID:101101858	human immunodeficiency virus type I enhancer binding protein 3	GO:0000981,GO:0003677,GO:0005634,GO:0005737,GO:0035914,GO:0045893,GO:0046872	DNA-binding transcription factor activity, RNA polymerase II-specific|DNA binding|nucleus|cytoplasm|skeletal muscle cell differentiation|positive regulation of transcription, DNA-templated|metal ion binding
HJURP	16.8732	5.93291	27.8135	4.6847	2.22796	0.00164323	0.00959495	Up	0.177669	0.472406	0.219363	0.0305318	0.0103424	0.130841	GeneID:101111929	Holliday junction recognition protein	GO:0000775,GO:0000777,GO:0003677,GO:0005634,GO:0005654,GO:0005730,GO:0005739,GO:0005829,GO:0007049,GO:0007059,GO:0034080,GO:0042393,GO:0042802,GO:0043254,GO:0051101	chromosome, centromeric region|condensed chromosome kinetochore|DNA binding|nucleus|nucleoplasm|nucleolus|mitochondrion|cytosol|cell cycle|chromosome segregation|CENP-A containing nucleosome assembly|histone binding|identical protein binding|regulation of protein complex assembly|regulation of DNA binding
HMGN5	9.16091	2.45	15.8718	6.47788	2.69552	0.00167863	0.00976164	Up	0.575779	0.861157	1.45411	0.178102	0.180992	0.0587105	GeneID:101108552	high mobility group nucleosome binding domain 5	GO:0000785,GO:0003682,GO:0003723,GO:0005634,GO:0006325,GO:0006355,GO:0008284,GO:0010628,GO:0031492,GO:0043066,GO:0045893,GO:0071157	chromatin|chromatin binding|RNA binding|nucleus|chromatin organization|regulation of transcription, DNA-templated|positive regulation of cell proliferation|positive regulation of gene expression|nucleosomal DNA binding|negative regulation of apoptotic process|positive regulation of transcription, DNA-templated|negative regulation of cell cycle arrest
HMMR	78.3746	16.0765	140.673	8.74813	3.12897	3.50423e-18	3.49418e-16	Up	0.899578	1.76946	0.974833	0.11805	0.0942586	0.175116	GeneID:443128	hyaluronan mediated motility receptor	GO:0005540,GO:0005813,GO:0005829,GO:0005886,GO:0009986,GO:0010389,GO:0015630,GO:0016020,GO:0030214	hyaluronic acid binding|centrosome|cytosol|plasma membrane|cell surface|regulation of G2/M transition of mitotic cell cycle|microtubule cytoskeleton|membrane|hyaluronan catabolic process	oas04512	ECM-receptor interaction
HOXA4	20.003	28.3184	11.6875	0.412977	-1.27587	0.00990838	0.0416643	Down	0.23419	0.175132	0.133074	0.407478	0.352743	0.462668	GeneID:101114773	homeobox A4	GO:0000977,GO:0000981,GO:0001228,GO:0001501,GO:0005634,GO:0009653,GO:0009952,GO:0016604,GO:0033613,GO:0048704	RNA polymerase II regulatory region sequence-specific DNA binding|DNA-binding transcription factor activity, RNA polymerase II-specific|DNA-binding transcription activator activity, RNA polymerase II-specific|skeletal system development|nucleus|anatomical structure morphogenesis|anterior/posterior pattern specification|nuclear body|activating transcription factor binding|embryonic skeletal system…
HSD11B1	29.4679	43.724	15.2118	0.34773	-1.52396	0.00127964	0.00782007	Down	0.0636029	0.243102	0.203461	0.327899	0.577579	0.464788	GeneID:443409	hydroxysteroid 11-beta dehydrogenase 1	GO:0005789,GO:0008202,GO:0016021,GO:0070524	endoplasmic reticulum membrane|steroid metabolic process|integral component of membrane|11-beta-hydroxysteroid dehydrogenase (NADP+) activity	oas00140,oas00980,oas05204	Steroid hormone biosynthesis|Metabolism of xenobiotics by cytochrome P450|Chemical carcinogenesis
HSH2D	110.353	183.083	37.6232	0.205519	-2.28266	9.69521e-05	0.000853228	Down	0.976043	0.629721	0.676658	4.14391	4.95311	1.28796	GeneID:101117244	hematopoietic SH2 domain containing	GO:0002903,GO:0005070,GO:0005634,GO:0005737,GO:0005739,GO:0005829,GO:0007165,GO:0042110,GO:0051902	negative regulation of B cell apoptotic process|SH3/SH2 adaptor activity|nucleus|cytoplasm|mitochondrion|cytosol|signal transduction|T cell activation|negative regulation of mitochondrial depolarization
HSPA12A	47.728	25.8644	69.5917	2.69016	1.42769	2.38789e-05	0.000251772	Up	0.300814	0.24212	0.256283	0.0822121	0.0721533	0.121954	GeneID:101120879	heat shock protein family A (Hsp70) member 12A	GO:0005524,GO:0070062	ATP binding|extracellular exosome
HSPA12B	9.38006	4.20079	14.5593	3.46738	1.79385	0.0179552	0.0666727	Up	0.143619	0.125301	0.145082	0.0185103	0.0658372	0.0274582	GeneID:101121442	heat shock protein family A (Hsp70) member 12B	GO:0005524	ATP binding
HSPB8	85.0311	124.461	45.6018	0.366258	-1.44907	2.8339e-08	6.05827e-07	Down	0.605689	0.603928	0.734232	1.37393	1.55136	2.01751	GeneID:101108164	heat shock protein family B (small) member 8	GO:0005634,GO:0005737,GO:0005829,GO:0042802	nucleus|cytoplasm|cytosol|identical protein binding
IBSP	145.172	237.471	52.8725	0.222593	-2.16752	3.0381e-23	5.77603e-21	Down	0.818409	0.462823	0.76505	2.83381	3.00778	2.72772	GeneID:101120495	integrin binding sialoprotein	GO:0005178,GO:0005615,GO:0007155,GO:0030198,GO:0030282,GO:0031012,GO:0031982,GO:0045785,GO:0071363	integrin binding|extracellular space|cell adhesion|extracellular matrix organization|bone mineralization|extracellular matrix|vesicle|positive regulation of cell adhesion|cellular response to growth factor stimulus	oas04151,oas04510,oas04512,oas05165	PI3K-Akt signaling pathway|Focal adhesion|ECM-receptor interaction|Human papillomavirus infection
ICAM1	3559.34	5028.65	2090.02	0.415621	-1.26666	1.21981e-25	3.16241e-23	Down	14.6062	14.2855	15.1041	38.5755	35.8661	24.3528	GeneID:443045	intercellular adhesion molecule 1	GO:0005178,GO:0005887,GO:0007155,GO:0098609	integrin binding|integral component of plasma membrane|cell adhesion|cell-cell adhesion	oas04064,oas04514,oas04650,oas04668,oas04670,oas04933,oas05143,oas05144,oas05150,oas05164,oas05166,oas05167,oas05169,oas05323,oas05416,oas05418	NF-kappa B signaling pathway|Cell adhesion molecules (CAMs)|Natural killer cell mediated cytotoxicity|TNF signaling pathway|Leukocyte transendothelial migration|AGE-RAGE signaling pathway in diabetic complications|African trypanosomiasis|Malaria|Staphylococcus aureus infection|Influenza A|Human T-cell leukemia virus 1 infection|Kaposi sarcoma-associated herpesvirus infection|Epstein-Barr virus in…
ICAM3	37.7487	55.2655	20.232	0.366248	-1.44911	6.81537e-05	0.000625664	Down	0.313331	0.286385	0.237392	0.767289	0.766059	0.599052	GeneID:101113326	intercellular adhesion molecule 3	GO:0005178,GO:0005887,GO:0006909,GO:0007155,GO:0098609	integrin binding|integral component of plasma membrane|phagocytosis|cell adhesion|cell-cell adhesion	oas04514	Cell adhesion molecules (CAMs)
ICAM4	38.1182	65.8092	10.4273	0.158563	-2.65687	3.65365e-08	7.67266e-07	Down	0.203284	0.360343	0.182538	1.63024	2.13003	0.64488	GeneID:101116476	intercellular adhesion molecule 4 (Landsteiner-Wiener blood group)	GO:0005178,GO:0005576,GO:0005615,GO:0005737,GO:0005886,GO:0005887,GO:0007155,GO:0098609	integrin binding|extracellular region|extracellular space|cytoplasm|plasma membrane|integral component of plasma membrane|cell adhesion|cell-cell adhesion
ICAM5	99.319	143.467	55.1707	0.3844	-1.37932	1.48821e-05	0.000166565	Down	0.309137	0.31466	0.500959	1.20858	1.05948	0.46626	GeneID:101116726	intercellular adhesion molecule 5	GO:0005178,GO:0005886,GO:0005887,GO:0006909,GO:0007155,GO:0030198,GO:0050776,GO:0098609	integrin binding|plasma membrane|integral component of plasma membrane|phagocytosis|cell adhesion|extracellular matrix organization|regulation of immune response|cell-cell adhesion
IFI44	113.077	49.2901	176.865	3.58773	1.84307	4.19281e-13	2.12004e-11	Up	0.777203	1.16751	0.919418	0.30051	0.176802	0.265902	GeneID:101110473	interferon induced protein 44	GO:0005737,GO:0006955,GO:0009617	cytoplasm|immune response|response to bacterium
IFI44L	110.367	72.0562	148.677	2.06364	1.04519	1.10578e-06	1.69178e-05	Up	1.94942	2.01757	1.84464	0.852346	0.995455	0.780011	GeneID:101103357	interferon induced protein 44 like	GO:0005525,GO:0005737,GO:0006955,GO:0051607	GTP binding|cytoplasm|immune response|defense response to virus
IGF1	3881.21	5209.25	2553.16	0.490108	-1.02883	1.06321e-23	2.16577e-21	Down	7.44794	5.68942	7.52124	11.8536	13.3439	14.0899	GeneID:443318	insulin like growth factor 1			oas01521,oas01522,oas04010,oas04014,oas04015,oas04066,oas04068,oas04114,oas04115,oas04150,oas04151,oas04152,oas04211,oas04213,oas04510,oas04550,oas04730,oas04750,oas04913,oas04914,oas04960,oas05200,oas05202,oas05205,oas05214,oas05215,oas05218,oas05224,oas05410,oas05414	EGFR tyrosine kinase inhibitor resistance|Endocrine resistance|MAPK signaling pathway|Ras signaling pathway|Rap1 signaling pathway|HIF-1 signaling pathway|FoxO signaling pathway|Oocyte meiosis|p53 signaling pathway|mTOR signaling pathway|PI3K-Akt signaling pathway|AMPK signaling pathway|Longevity regulating pathway|Longevity regulating pathway - multiple species|Focal adhesion|Signaling pathways …
IGF2	11.567	20.2738	2.86018	0.140699	-2.82931	0.000203393	0.00163207	Down	0.00972094	0.029078	0.0490999	0.230531	0.132414	0.218068	GeneID:443325	insulin like growth factor 2	GO:0000122,GO:0001503,GO:0001701,GO:0001892,GO:0005178,GO:0005179,GO:0005615,GO:0006006,GO:0008083,GO:0008284,GO:0031056,GO:0051147,GO:0051781,GO:0060669	negative regulation of transcription by RNA polymerase II|ossification|in utero embryonic development|embryonic placenta development|integrin binding|hormone activity|extracellular space|glucose metabolic process|growth factor activity|positive regulation of cell proliferation|regulation of histone modification|regulation of muscle cell differentiation|positive regulation of cell division|embryon…	oas04010,oas04014,oas04151,oas05200,oas05205,oas05225	MAPK signaling pathway|Ras signaling pathway|PI3K-Akt signaling pathway|Pathways in cancer|Proteoglycans in cancer|Hepatocellular carcinoma
IGSF3	22.5101	30.4356	14.5845	0.478888	-1.06224	0.0288756	0.0958866	Down	0.0387972	0.0527515	0.0712591	0.138192	0.110869	0.0683316	GeneID:101110899	immunoglobulin superfamily member 3	GO:0009986,GO:0016021,GO:0032808	cell surface|integral component of membrane|lacrimal gland development
IL16	116.778	162.391	71.1645	0.438311	-1.18997	1.65096e-05	0.000181784	Down	0.391998	0.321884	0.326111	0.770323	1.02443	0.423222	GeneID:101116938	interleukin 16			oas04060	Cytokine-cytokine receptor interaction
IL1R2	119.842	164.443	75.2402	0.457674	-1.12761	1.48551e-05	0.000166394	Down	1.4866	0.94981	1.00602	2.73821	2.7524	1.53056	GeneID:101103308	interleukin 1 receptor type 2			oas04060,oas04640,oas05146,oas05166,oas05202,oas05215,oas05418	Cytokine-cytokine receptor interaction|Hematopoietic cell lineage|Amoebiasis|Human T-cell leukemia virus 1 infection|Transcriptional misregulation in cancer|Prostate cancer|Fluid shear stress and atherosclerosis
IL1RL1	11.5892	17.139	6.03939	0.351714	-1.50753	0.0250581	0.0859729	Down	0.0416001	0.0414791	0.115566	0.171572	0.19615	0.159069	GeneID:101109529	interleukin 1 receptor like 1	GO:0002826,GO:0004896,GO:0004908,GO:0005576,GO:0005886,GO:0006955,GO:0007165,GO:0009897,GO:0016021,GO:0032689,GO:0032754,GO:0038172,GO:0043032,GO:0050729,GO:0090197	negative regulation of T-helper 1 type immune response|cytokine receptor activity|interleukin-1 receptor activity|extracellular region|plasma membrane|immune response|signal transduction|external side of plasma membrane|integral component of membrane|negative regulation of interferon-gamma production|positive regulation of interleukin-5 production|interleukin-33-mediated signaling pathway|positiv…	oas04060	Cytokine-cytokine receptor interaction
IL1RN	35.0614	18.5338	51.5889	2.78334	1.47682	0.000711831	0.00474965	Up	0.50992	0.711813	0.629585	0.362196	0.130606	0.127099	GeneID:780505	interleukin 1 receptor antagonist	GO:0001660,GO:0002439,GO:0005125,GO:0005149,GO:0005150,GO:0005151,GO:0005615,GO:0006629,GO:0007565,GO:0007613,GO:0014050,GO:0014823,GO:0019221,GO:0019233,GO:0019752,GO:0030073,GO:0030336,GO:0030593,GO:0031982,GO:0032755,GO:0034115,GO:0042493,GO:0042594,GO:0043066,GO:0043123,GO:0043507,GO:0045352,GO:0045353,GO:0045837,GO:0046330,GO:0051384,GO:0070555,GO:0070670,GO:0071222,GO:0071874,GO:2000660	fever generation|chronic inflammatory response to antigenic stimulus|cytokine activity|interleukin-1 receptor binding|interleukin-1, type I receptor binding|interleukin-1, type II receptor binding|extracellular space|lipid metabolic process|female pregnancy|memory|negative regulation of glutamate secretion|response to activity|cytokine-mediated signaling pathway|sensory perception of pain|carboxy…	oas04060	Cytokine-cytokine receptor interaction
IL34	43.8605	63.3386	24.3824	0.384904	-1.37743	0.000673037	0.00453537	Down	0.125918	0.0896799	0.131744	0.380221	0.329845	0.13298	GeneID:101113261	interleukin 34	GO:0001934,GO:0005125,GO:0005157,GO:0005615,GO:0006954,GO:0008083,GO:0008284,GO:0045087,GO:0045651,GO:0045657	positive regulation of protein phosphorylation|cytokine activity|macrophage colony-stimulating factor receptor binding|extracellular space|inflammatory response|growth factor activity|positive regulation of cell proliferation|innate immune response|positive regulation of macrophage differentiation|positive regulation of monocyte differentiation	oas04060	Cytokine-cytokine receptor interaction
IL6	3051.37	4774.02	1328.72	0.278312	-1.84522	3.99274e-70	1.42331e-66	Down	33.114	32.5541	37.333	125.596	125.915	93.8594	GeneID:443406	interleukin 6	GO:0005125,GO:0005138,GO:0005615,GO:0006953,GO:0008083,GO:0050870,GO:0050871,GO:0071354,GO:0072540	cytokine activity|interleukin-6 receptor binding|extracellular space|acute-phase response|growth factor activity|positive regulation of T cell activation|positive regulation of B cell activation|cellular response to interleukin-6|T-helper 17 cell lineage commitment	oas01521,oas01523,oas04060,oas04066,oas04068,oas04151,oas04218,oas04620,oas04621,oas04623,oas04625,oas04630,oas04640,oas04657,oas04659,oas04668,oas04672,oas04931,oas04932,oas04933,oas05020,oas05132,oas05133,oas05134,oas05142,oas05143,oas05144,oas05146,oas05152,oas05161,oas05162,oas05163,oas05164,oas05166,oas05167,oas05168,oas05169,oas05200,oas05202,oas05321,oas05323,oas05332,oas05410	EGFR tyrosine kinase inhibitor resistance|Antifolate resistance|Cytokine-cytokine receptor interaction|HIF-1 signaling pathway|FoxO signaling pathway|PI3K-Akt signaling pathway|Cellular senescence|Toll-like receptor signaling pathway|NOD-like receptor signaling pathway|Cytosolic DNA-sensing pathway|C-type lectin receptor signaling pathway|Jak-STAT signaling pathway|Hematopoietic cell lineage|IL-1…
ILDR2	13.103	6.29082	19.9152	3.16543	1.6624	0.00906442	0.0389098	Up	0.0878158	0.0583737	0.0591403	0.0134141	0.0170397	0.0298477	GeneID:101110204	immunoglobulin like domain containing receptor 2	GO:0005789,GO:0009749,GO:0016021,GO:0030073,GO:0030154,GO:0031016,GO:0048873	endoplasmic reticulum membrane|response to glucose|integral component of membrane|insulin secretion|cell differentiation|pancreas development|homeostasis of number of cells within a tissue
INA	40.9593	7.33763	74.5811	10.1603	3.34488	5.53519e-13	2.73262e-11	Up	0.602342	0.86752	0.507066	0.0776329	0.0262975	0.0767739	GeneID:101115747	internexin neuronal intermediate filament protein alpha	GO:0005200,GO:0005615,GO:0005654,GO:0005883,GO:0021762,GO:0030154,GO:0031965,GO:0036464,GO:0043209,GO:0045111,GO:0060052,GO:0098685,GO:0098794,GO:0098973,GO:0099184,GO:1990830	structural constituent of cytoskeleton|extracellular space|nucleoplasm|neurofilament|substantia nigra development|cell differentiation|nuclear membrane|cytoplasmic ribonucleoprotein granule|myelin sheath|intermediate filament cytoskeleton|neurofilament cytoskeleton organization|Schaffer collateral - CA1 synapse|postsynapse|structural constituent of postsynaptic actin cytoskeleton|structural const…
INAVA	20.5557	9.78583	31.3256	3.20017	1.67815	0.00102877	0.00648284	Up	0.206574	0.305146	0.247323	0.0631095	0.0561167	0.101418	GeneID:101108243	innate immunity activator	GO:0000187,GO:0002221,GO:0002367,GO:0005634,GO:0005737,GO:0031398,GO:0032494,GO:0032495,GO:0032731,GO:0032733,GO:0032755,GO:0032874,GO:0034334,GO:0043123,GO:0045087,GO:0060729,GO:0070431,GO:1903409	activation of MAPK activity|pattern recognition receptor signaling pathway|cytokine production involved in immune response|nucleus|cytoplasm|positive regulation of protein ubiquitination|response to peptidoglycan|response to muramyl dipeptide|positive regulation of interleukin-1 beta production|positive regulation of interleukin-10 production|positive regulation of interleukin-6 production|positi…
INHBE	797.296	1079.37	515.22	0.477341	-1.06691	0.000609789	0.00416028	Down	7.51485	6.13505	6.20333	16.061	14.7672	7.99745	GeneID:101121588	inhibin subunit beta E	GO:0005125,GO:0005160,GO:0005179,GO:0005615,GO:0008083,GO:0010862,GO:0042981,GO:0043408,GO:0048468,GO:0060395	cytokine activity|transforming growth factor beta receptor binding|hormone activity|extracellular space|growth factor activity|positive regulation of pathway-restricted SMAD protein phosphorylation|regulation of apoptotic process|regulation of MAPK cascade|cell development|SMAD protein signal transduction	oas04060,oas04350,oas04550	Cytokine-cytokine receptor interaction|TGF-beta signaling pathway|Signaling pathways regulating pluripotency of stem cells
INPP5J	13.3308	20.308	6.35357	0.312462	-1.67825	0.0167878	0.0633607	Down	0.0300072	0.023936	0.0666883	0.123759	0.194939	0.0428364	GeneID:101103674	inositol polyphosphate-5-phosphatase J	GO:0001726,GO:0004439,GO:0004445,GO:0005737,GO:0005829,GO:0005886,GO:0006661,GO:0010977,GO:0017124,GO:0030426,GO:0031115,GO:0033137,GO:0034485,GO:0043198,GO:0043647,GO:0046855,GO:0046856,GO:0052658,GO:0052659	ruffle|phosphatidylinositol-4,5-bisphosphate 5-phosphatase activity|inositol-polyphosphate 5-phosphatase activity|cytoplasm|cytosol|plasma membrane|phosphatidylinositol biosynthetic process|negative regulation of neuron projection development|SH3 domain binding|growth cone|negative regulation of microtubule polymerization|negative regulation of peptidyl-serine phosphorylation|phosphatidylinositol…	oas00562,oas04070	Inositol phosphate metabolism|Phosphatidylinositol signaling system
IQCF1	11.5214	19.5733	3.46953	0.177543	-2.49376	0.000815141	0.00533904	Down	0.179301	0.05108	0.0517509	0.581033	0.322069	0.574604	GeneID:101115577	IQ motif containing F1	GO:0001669,GO:0005516,GO:0060474,GO:2000344	acrosomal vesicle|calmodulin binding|positive regulation of flagellated sperm motility involved in capacitation|positive regulation of acrosome reaction
IQCN	176.014	258.288	93.7389	0.362912	-1.46231	0.00238099	0.0130579	Down	0.565471	0.494787	0.652837	1.89193	1.87425	0.647198	GeneID:101111020	IQ motif containing N	GO:0005634,GO:0005739	nucleus|mitochondrion
IQGAP3	62.8296	15.7325	109.927	6.98743	2.80476	3.90127e-11	1.41548e-09	Up	0.387188	0.859448	0.358538	0.0285159	0.0821058	0.103401	GeneID:101108447	IQ motif containing GTPase activating protein 3	GO:0000082,GO:0000187,GO:0005516,GO:0005829,GO:0005911,GO:0007265,GO:0008361,GO:0010628,GO:0010629,GO:0016328,GO:0017048,GO:0033601,GO:0043087,GO:0070371,GO:0070856,GO:0071310	G1/S transition of mitotic cell cycle|activation of MAPK activity|calmodulin binding|cytosol|cell-cell junction|Ras protein signal transduction|regulation of cell size|positive regulation of gene expression|negative regulation of gene expression|lateral plasma membrane|Rho GTPase binding|positive regulation of mammary gland epithelial cell proliferation|regulation of GTPase activity|ERK1 and ERK2…	oas04810	Regulation of actin cytoskeleton
ISG20	22.6028	32.862	12.3436	0.375551	-1.41292	0.00369769	0.0189839	Down	0.279399	0.526219	0.407687	1.28037	0.715627	1.01296	GeneID:101116513	interferon stimulated exonuclease gene 20	GO:0000175,GO:0000738,GO:0004527,GO:0005634,GO:0005654,GO:0005730,GO:0005737,GO:0006364,GO:0006401,GO:0008283,GO:0008310,GO:0008859,GO:0009615,GO:0015030,GO:0016605,GO:0030619,GO:0030620,GO:0034511,GO:0045071,GO:0046872,GO:0051607,GO:0060337	3'-5'-exoribonuclease activity|DNA catabolic process, exonucleolytic|exonuclease activity|nucleus|nucleoplasm|nucleolus|cytoplasm|rRNA processing|RNA catabolic process|cell proliferation|single-stranded DNA 3'-5' exodeoxyribonuclease activity|exoribonuclease II activity|response to virus|Cajal body|PML body|U1 snRNA binding|U2 snRNA binding|U3 snoRNA binding|negative regulation of viral genome re…
ISLR	6547.68	8833.49	4261.88	0.482458	-1.05152	2.24015e-23	4.31653e-21	Down	53.6847	38.7451	55.5157	94.2214	93.9359	97.6707	GeneID:101110878	immunoglobulin superfamily containing leucine rich repeat	GO:0005576	extracellular region
ITGAD	734.544	474.39	994.698	2.09694	1.06829	1.09189e-15	8.19433e-14	Up	7.29155	7.64858	7.19553	3.58526	3.82744	2.44252	GeneID:101105872	integrin subunit alpha D	GO:0005886,GO:0006955,GO:0007229,GO:0008305,GO:0009986,GO:0030198,GO:0034113,GO:0046872	plasma membrane|immune response|integrin-mediated signaling pathway|integrin complex|cell surface|extracellular matrix organization|heterotypic cell-cell adhesion|metal ion binding	oas04810	Regulation of actin cytoskeleton
ITGAX	94.2648	60.1482	128.381	2.13463	1.09399	2.62135e-05	0.000272632	Up	0.945489	1.29047	0.915977	0.599309	0.389781	0.387216	GeneID:101106739	integrin subunit alpha X	GO:0005886,GO:0007155,GO:0007229,GO:0008305,GO:0009887,GO:0009986,GO:0016020,GO:0019221,GO:0030198,GO:0030667,GO:0034113,GO:0038023,GO:0043312,GO:0046872,GO:0050900,GO:0070821,GO:0101003	plasma membrane|cell adhesion|integrin-mediated signaling pathway|integrin complex|animal organ morphogenesis|cell surface|membrane|cytokine-mediated signaling pathway|extracellular matrix organization|secretory granule membrane|heterotypic cell-cell adhesion|signaling receptor activity|neutrophil degranulation|metal ion binding|leukocyte migration|tertiary granule membrane|ficolin-1-rich granule…	oas04610,oas04810,oas05152	Complement and coagulation cascades|Regulation of actin cytoskeleton|Tuberculosis
ITGB4	34.3139	49.6716	18.9562	0.381892	-1.38876	0.00030598	0.00233439	Down	0.1111	0.0969301	0.0701451	0.210014	0.266777	0.20297	GeneID:101119919	integrin subunit beta 4	GO:0005178,GO:0005615,GO:0005737,GO:0005925,GO:0005938,GO:0007155,GO:0007160,GO:0007229,GO:0008305,GO:0009611,GO:0009986,GO:0016020,GO:0016021,GO:0016477,GO:0030056,GO:0031252,GO:0031581,GO:0033627,GO:0048870,GO:0050839	integrin binding|extracellular space|cytoplasm|focal adhesion|cell cortex|cell adhesion|cell-matrix adhesion|integrin-mediated signaling pathway|integrin complex|response to wounding|cell surface|membrane|integral component of membrane|cell migration|hemidesmosome|cell leading edge|hemidesmosome assembly|cell adhesion mediated by integrin|cell motility|cell adhesion molecule binding	oas04151,oas04510,oas04512,oas04810,oas05165,oas05410,oas05412,oas05414	PI3K-Akt signaling pathway|Focal adhesion|ECM-receptor interaction|Regulation of actin cytoskeleton|Human papillomavirus infection|Hypertrophic cardiomyopathy (HCM)|Arrhythmogenic right ventricular cardiomyopathy (ARVC)|Dilated cardiomyopathy (DCM)
ITIH4	75.2283	101.408	49.0488	0.483658	-1.04794	0.000363236	0.00270605	Down	0.548648	0.242266	0.427554	0.703084	0.796617	0.847152	GeneID:101108959	inter-alpha-trypsin inhibitor heavy chain family member 4	GO:0004867,GO:0005576,GO:0006953,GO:0030212	serine-type endopeptidase inhibitor activity|extracellular region|acute-phase response|hyaluronan metabolic process
JAKMIP2	3.21115	0.69837	5.72393	8.18114	3.0323	0.0447995	0.13392	Up	0.03844	0.0153313	0.0854296	0.00792695	0	0.00783923	GeneID:101115029	janus kinase and microtubule interacting protein 2	GO:0005794,GO:0008017,GO:0019900	Golgi apparatus|microtubule binding|kinase binding
KCNA3	517.269	733.322	301.216	0.410758	-1.28364	4.84592e-30	2.03229e-27	Down	1.01284	0.890738	0.947709	2.04552	2.20393	2.22091	GeneID:101105466	potassium voltage-gated channel subfamily A member 3	GO:0005244,GO:0005249,GO:0005251,GO:0005886,GO:0006813,GO:0008076,GO:0015271,GO:0016021,GO:0030424,GO:0034765,GO:0044305,GO:0045121,GO:0051260,GO:0071435,GO:0071805,GO:0098978,GO:0099055,GO:0099056	voltage-gated ion channel activity|voltage-gated potassium channel activity|delayed rectifier potassium channel activity|plasma membrane|potassium ion transport|voltage-gated potassium channel complex|outward rectifier potassium channel activity|integral component of membrane|axon|regulation of ion transmembrane transport|calyx of Held|membrane raft|protein homooligomerization|potassium ion expor…
KCNE4	58.7763	95.1264	22.4261	0.235923	-2.08361	2.08667e-09	5.60336e-08	Down	0.384105	0.137483	0.179085	0.96472	0.939094	0.863662	GeneID:101120989	potassium voltage-gated channel subfamily E regulatory subunit 4	GO:0005249,GO:0015459,GO:0016021,GO:0016324,GO:0044325,GO:0060307,GO:0071435,GO:0086005,GO:0086011,GO:0086091,GO:0098915,GO:1902260	voltage-gated potassium channel activity|potassium channel regulator activity|integral component of membrane|apical plasma membrane|ion channel binding|regulation of ventricular cardiac muscle cell membrane repolarization|potassium ion export|ventricular cardiac muscle cell action potential|membrane repolarization during action potential|regulation of heart rate by cardiac conduction|membrane rep…
KCNJ14	44.358	71.0123	17.7037	0.249422	-2.00334	3.16602e-08	6.69797e-07	Down	0.221781	0.18093	0.162939	0.831544	0.760532	0.524243	GeneID:101106197	potassium voltage-gated channel subfamily J member 14	GO:0005242,GO:0005886,GO:0008076,GO:0010107,GO:0030425,GO:0034765,GO:0043025	inward rectifier potassium channel activity|plasma membrane|voltage-gated potassium channel complex|potassium ion import|dendrite|regulation of ion transmembrane transport|neuronal cell body	oas04725,oas04921	Cholinergic synapse|Oxytocin signaling pathway
KCNJ15	358.141	619.619	96.6636	0.155998	-2.6804	6.31537e-05	0.000585126	Down	0.59881	0.668149	0.914567	5.90225	5.94573	1.24298	GeneID:101117981	potassium voltage-gated channel subfamily J member 15	GO:0005242,GO:0005886,GO:0005887,GO:0006813,GO:0010107,GO:0015467,GO:0034765	inward rectifier potassium channel activity|plasma membrane|integral component of plasma membrane|potassium ion transport|potassium ion import|G-protein activated inward rectifier potassium channel activity|regulation of ion transmembrane transport	oas04971	Gastric acid secretion
KHDRBS3	162.605	89.8238	235.387	2.62013	1.38964	4.49051e-10	1.3537e-08	Up	2.71451	2.83865	2.67528	0.716785	0.820912	1.38395	GeneID:101119650	KH RNA binding domain containing, signal transduction associated 3	GO:0003723,GO:0003727,GO:0005634,GO:0005654,GO:0006397,GO:0017124,GO:0019904,GO:0033120,GO:0042802,GO:0048024,GO:0051259	RNA binding|single-stranded RNA binding|nucleus|nucleoplasm|mRNA processing|SH3 domain binding|protein domain specific binding|positive regulation of RNA splicing|identical protein binding|regulation of mRNA splicing, via spliceosome|protein complex oligomerization
KIAA1755	7.5653	12.5907	2.53988	0.201355	-2.31219	0.00729429	0.032615	Down	0.00606902	0.0181541	0.0245234	0.0688341	0.0826693	0.0742608	GeneID:101123397	KIAA1755 ortholog
KIF11	133.147	26.562	239.733	9.02494	3.17392	5.89923e-07	9.53709e-06	Up	0.79892	2.61739	0.916589	0.117679	0.119588	0.209478	GeneID:101102946	kinesin family member 11	GO:0000278,GO:0000922,GO:0003777,GO:0005524,GO:0005634,GO:0005819,GO:0005829,GO:0005871,GO:0005874,GO:0005876,GO:0006890,GO:0007018,GO:0007051,GO:0007052,GO:0007100,GO:0008017,GO:0008574,GO:0016020,GO:0016887,GO:0019886,GO:0019901,GO:0044877,GO:0046602,GO:0051301,GO:0072686,GO:0090307	mitotic cell cycle|spindle pole|microtubule motor activity|ATP binding|nucleus|spindle|cytosol|kinesin complex|microtubule|spindle microtubule|retrograde vesicle-mediated transport, Golgi to ER|microtubule-based movement|spindle organization|mitotic spindle organization|mitotic centrosome separation|microtubule binding|ATP-dependent microtubule motor activity, plus-end-directed|membrane|ATPase ac…
KIF14	28.9394	4.19338	53.6855	12.7991	3.67797	3.71713e-08	7.78102e-07	Up	0.098735	0.463526	0.137144	0.0212091	0.00862129	0.0209744	GeneID:101107720	kinesin family member 14
KIF15	38.555	9.4363	67.6736	7.16965	2.8419	1.4266e-10	4.71971e-09	Up	0.223994	0.342459	0.233818	0.0192463	0.0312937	0.0532933	GeneID:101121554	kinesin family member 15	GO:0000278,GO:0003677,GO:0003774,GO:0003777,GO:0005524,GO:0005813,GO:0005819,GO:0005829,GO:0005871,GO:0005873,GO:0005874,GO:0006890,GO:0007018,GO:0008017,GO:0008283,GO:0016020,GO:0016887,GO:0019886	mitotic cell cycle|DNA binding|motor activity|microtubule motor activity|ATP binding|centrosome|spindle|cytosol|kinesin complex|plus-end kinesin complex|microtubule|retrograde vesicle-mediated transport, Golgi to ER|microtubule-based movement|microtubule binding|cell proliferation|membrane|ATPase activity|antigen processing and presentation of exogenous peptide antigen via MHC class II
KIF18A	24.8858	15.041	34.7306	2.31015	1.20799	0.0139391	0.0546072	Up	0.255644	0.446076	0.177546	0.0823716	0.150675	0.12219	GeneID:101117696	kinesin family member 18A	GO:0000070,GO:0000776,GO:0001726,GO:0003777,GO:0003779,GO:0005524,GO:0005634,GO:0005737,GO:0005815,GO:0005828,GO:0005829,GO:0005871,GO:0005874,GO:0005901,GO:0006890,GO:0007018,GO:0007019,GO:0007080,GO:0007140,GO:0008017,GO:0008574,GO:0015031,GO:0015630,GO:0016887,GO:0019886,GO:0051010,GO:0061673,GO:0070463,GO:0070507,GO:0071392,GO:0072520,GO:1990023	mitotic sister chromatid segregation|kinetochore|ruffle|microtubule motor activity|actin binding|ATP binding|nucleus|cytoplasm|microtubule organizing center|kinetochore microtubule|cytosol|kinesin complex|microtubule|caveola|retrograde vesicle-mediated transport, Golgi to ER|microtubule-based movement|microtubule depolymerization|mitotic metaphase plate congression|male meiotic nuclear division|m…
KIF18B	11.0037	2.09717	19.9103	9.49236	3.24677	0.000274254	0.00212416	Up	0.0630736	0.272524	0.106194	0.021678	0.00734323	0.0142921	GeneID:101118461	kinesin family member 18B	GO:0000070,GO:0000235,GO:0000278,GO:0003774,GO:0003777,GO:0005524,GO:0005634,GO:0005737,GO:0005829,GO:0005871,GO:0005874,GO:0007018,GO:0007019,GO:0008017,GO:0008574,GO:0016604,GO:0016887,GO:0019894,GO:0035371,GO:0051301,GO:0051302,GO:0061673,GO:1990023,GO:1990752	mitotic sister chromatid segregation|astral microtubule|mitotic cell cycle|motor activity|microtubule motor activity|ATP binding|nucleus|cytoplasm|cytosol|kinesin complex|microtubule|microtubule-based movement|microtubule depolymerization|microtubule binding|ATP-dependent microtubule motor activity, plus-end-directed|nuclear body|ATPase activity|kinesin binding|microtubule plus-end|cell division|…
KIF1A	33.6823	46.8529	20.5116	0.438158	-1.19048	0.00516468	0.0247957	Down	0.0630598	0.115825	0.0368802	0.16426	0.135627	0.159059	GeneID:101103691	kinesin family member 1A	GO:0003774,GO:0003777,GO:0005524,GO:0005829,GO:0005871,GO:0005874,GO:0007018,GO:0008017,GO:0008021,GO:0008089,GO:0008574,GO:0016192,GO:0016887,GO:0022027,GO:0030424,GO:0030425,GO:0030705,GO:0042802,GO:0042803,GO:0043005,GO:0043025,GO:0098794,GO:0098840,GO:1904115,GO:1990048,GO:1990049	motor activity|microtubule motor activity|ATP binding|cytosol|kinesin complex|microtubule|microtubule-based movement|microtubule binding|synaptic vesicle|anterograde axonal transport|ATP-dependent microtubule motor activity, plus-end-directed|vesicle-mediated transport|ATPase activity|interkinetic nuclear migration|axon|dendrite|cytoskeleton-dependent intracellular transport|identical protein bin…
KIF20A	190.077	28.9854	351.168	12.114	3.5986	2.34465e-06	3.23644e-05	Up	1.80175	5.56655	2.50153	0.173878	0.1116	0.470612	GeneID:101109352	kinesin family member 20A	GO:0000281,GO:0001578,GO:0003777,GO:0005524,GO:0005634,GO:0005654,GO:0005794,GO:0005819,GO:0005871,GO:0005874,GO:0007018,GO:0008017,GO:0015031,GO:0016887,GO:0019901,GO:0030496,GO:0032154,GO:0032465,GO:0045171,GO:0061952	mitotic cytokinesis|microtubule bundle formation|microtubule motor activity|ATP binding|nucleus|nucleoplasm|Golgi apparatus|spindle|kinesin complex|microtubule|microtubule-based movement|microtubule binding|protein transport|ATPase activity|protein kinase binding|midbody|cleavage furrow|regulation of cytokinesis|intercellular bridge|midbody abscission
KIF20B	108.255	66.7874	149.724	2.24158	1.16452	4.39916e-06	5.63085e-05	Up	0.499765	0.915083	0.738927	0.318548	0.276111	0.301125	GeneID:101122564	kinesin family member 20B	GO:0001843,GO:0003777,GO:0005524,GO:0005634,GO:0005654,GO:0005730,GO:0005737,GO:0005813,GO:0005871,GO:0005874,GO:0007018,GO:0007050,GO:0007088,GO:0008017,GO:0008284,GO:0008574,GO:0016887,GO:0030426,GO:0030496,GO:0032467,GO:0035372,GO:0042803,GO:0048471,GO:0048812,GO:0050699,GO:0051233,GO:0051301,GO:0070938,GO:0090316,GO:0097431,GO:1903438,GO:1990023,GO:2000114,GO:2001224	neural tube closure|microtubule motor activity|ATP binding|nucleus|nucleoplasm|nucleolus|cytoplasm|centrosome|kinesin complex|microtubule|microtubule-based movement|cell cycle arrest|regulation of mitotic nuclear division|microtubule binding|positive regulation of cell proliferation|ATP-dependent microtubule motor activity, plus-end-directed|ATPase activity|growth cone|midbody|positive regulation…
KIF22	57.3645	17.4661	97.2628	5.56734	2.47699	1.47918e-08	3.33729e-07	Up	0.968832	2.18963	0.82211	0.199789	0.108283	0.35564	GeneID:101120211	kinesin family member 22	GO:0003677,GO:0003777,GO:0005524,GO:0005829,GO:0005874,GO:0006281,GO:0007018,GO:0007062,GO:0007080,GO:0008017,GO:0016607,GO:0051310,GO:0072686	DNA binding|microtubule motor activity|ATP binding|cytosol|microtubule|DNA repair|microtubule-based movement|sister chromatid cohesion|mitotic metaphase plate congression|microtubule binding|nuclear speck|metaphase plate congression|mitotic spindle	oas04914	Progesterone-mediated oocyte maturation
KIF23	175.696	112.576	238.816	2.12157	1.08513	4.13684e-05	0.000405411	Up	1.46528	2.81246	1.26558	0.974478	0.629486	0.829226	GeneID:101114023	kinesin family member 23	GO:0000022,GO:0000281,GO:0000915,GO:0003777,GO:0005524,GO:0005634,GO:0005654,GO:0005813,GO:0005819,GO:0005829,GO:0005871,GO:0005874,GO:0005925,GO:0006890,GO:0007018,GO:0008017,GO:0016887,GO:0019886,GO:0030496,GO:0032467,GO:0045171,GO:0051256,GO:0072383,GO:0072686,GO:0090543,GO:0097149	mitotic spindle elongation|mitotic cytokinesis|actomyosin contractile ring assembly|microtubule motor activity|ATP binding|nucleus|nucleoplasm|centrosome|spindle|cytosol|kinesin complex|microtubule|focal adhesion|retrograde vesicle-mediated transport, Golgi to ER|microtubule-based movement|microtubule binding|ATPase activity|antigen processing and presentation of exogenous peptide antigen via MHC…	oas05206	MicroRNAs in cancer
KIF2C	31.3551	8.72762	53.9826	6.18221	2.62812	6.35864e-06	7.85684e-05	Up	0.408856	0.91014	0.307364	0.0392152	0.0298886	0.174516	GeneID:101117203	kinesin family member 2C	GO:0000278,GO:0000775,GO:0000776,GO:0000777,GO:0003777,GO:0005524,GO:0005634,GO:0005813,GO:0005829,GO:0005871,GO:0005874,GO:0006890,GO:0007018,GO:0007019,GO:0007080,GO:0008017,GO:0008283,GO:0015630,GO:0016020,GO:0016887,GO:0019237,GO:0019886,GO:0030951,GO:0035371,GO:0051010,GO:0051301,GO:0051310,GO:0051315,GO:0051983	mitotic cell cycle|chromosome, centromeric region|kinetochore|condensed chromosome kinetochore|microtubule motor activity|ATP binding|nucleus|centrosome|cytosol|kinesin complex|microtubule|retrograde vesicle-mediated transport, Golgi to ER|microtubule-based movement|microtubule depolymerization|mitotic metaphase plate congression|microtubule binding|cell proliferation|microtubule cytoskeleton|mem…
KIF4A	60.6803	12.9371	108.423	8.38087	3.0671	3.59262e-12	1.52462e-10	Up	0.369988	1.23179	0.551134	0.0969884	0.065708	0.0767322	GeneID:101123442	kinesin family member 4A	GO:0000281,GO:0003677,GO:0003777,GO:0005524,GO:0005654,GO:0005829,GO:0005871,GO:0005874,GO:0006890,GO:0007018,GO:0007052,GO:0008017,GO:0016363,GO:0016887,GO:0019886,GO:0045171,GO:0051256	mitotic cytokinesis|DNA binding|microtubule motor activity|ATP binding|nucleoplasm|cytosol|kinesin complex|microtubule|retrograde vesicle-mediated transport, Golgi to ER|microtubule-based movement|mitotic spindle organization|microtubule binding|nuclear matrix|ATPase activity|antigen processing and presentation of exogenous peptide antigen via MHC class II|intercellular bridge|mitotic spindle mid…
KIFC1	53.6667	24.4651	82.8684	3.3866	1.75984	8.20285e-07	1.29529e-05	Up	0.792194	1.37936	0.931652	0.341356	0.173447	0.337579	GeneID:101113367	kinesin family member C1	GO:0000070,GO:0003777,GO:0005524,GO:0005634,GO:0005769,GO:0005815,GO:0005871,GO:0005874,GO:0007018,GO:0007080,GO:0007283,GO:0008017,GO:0016020,GO:0016887,GO:0051301,GO:0072686,GO:0090307	mitotic sister chromatid segregation|microtubule motor activity|ATP binding|nucleus|early endosome|microtubule organizing center|kinesin complex|microtubule|microtubule-based movement|mitotic metaphase plate congression|spermatogenesis|microtubule binding|membrane|ATPase activity|cell division|mitotic spindle|mitotic spindle assembly
KLF15	12.907	18.5301	7.28387	0.392927	-1.34767	0.0353935	0.112375	Down	0.0554796	0.0221273	0.0504403	0.14301	0.0697585	0.0905135	GeneID:101115319	Kruppel like factor 15	GO:0000977,GO:0000978,GO:0000981,GO:0001228,GO:0005634,GO:0006357,GO:0010001,GO:0014898,GO:0044212,GO:0045944,GO:0046872,GO:0072112,GO:2000757,GO:2001275	RNA polymerase II regulatory region sequence-specific DNA binding|RNA polymerase II proximal promoter sequence-specific DNA binding|DNA-binding transcription factor activity, RNA polymerase II-specific|DNA-binding transcription activator activity, RNA polymerase II-specific|nucleus|regulation of transcription by RNA polymerase II|glial cell differentiation|cardiac muscle hypertrophy in response t…
KLHL3	42.1185	13.9916	70.2454	5.02113	2.32801	3.76066e-09	9.44071e-08	Up	0.197437	0.353624	0.262237	0.0490083	0.0574655	0.0447379	GeneID:101107091	kelch like family member 3	GO:0003779,GO:0005829,GO:0005856,GO:0006511,GO:0016567,GO:0031463,GO:0050801,GO:0070294,GO:0070936,GO:0072156	actin binding|cytosol|cytoskeleton|ubiquitin-dependent protein catabolic process|protein ubiquitination|Cul3-RING ubiquitin ligase complex|ion homeostasis|renal sodium ion absorption|protein K48-linked ubiquitination|distal tubule morphogenesis
KLHL40	12.2522	21.3361	3.16824	0.148381	-2.75262	0.000123758	0.00106177	Down	0.0338523	0.0337539	0.0455963	0.31414	0.224648	0.172591	GeneID:101119589	kelch like family member 40	GO:0005737,GO:0031397,GO:0031398,GO:0031463,GO:0031672,GO:0031674,GO:0032435,GO:0032436,GO:0048741,GO:0098528	cytoplasm|negative regulation of protein ubiquitination|positive regulation of protein ubiquitination|Cul3-RING ubiquitin ligase complex|A band|I band|negative regulation of proteasomal ubiquitin-dependent protein catabolic process|positive regulation of proteasomal ubiquitin-dependent protein catabolic process|skeletal muscle fiber development|skeletal muscle fiber differentiation
KNG1	41.528	61.5606	21.4955	0.349339	-1.5173	1.27797e-05	0.000145879	Down	0.201035	0.177322	0.148407	0.470374	0.518515	0.417864	GeneID:101112781	kininogen 1	GO:0004869,GO:0005576,GO:0005615,GO:0005623,GO:0006954,GO:0007204,GO:0007596,GO:0010951,GO:0030195,GO:0042311	cysteine-type endopeptidase inhibitor activity|extracellular region|extracellular space|cell|inflammatory response|positive regulation of cytosolic calcium ion concentration|blood coagulation|negative regulation of endopeptidase activity|negative regulation of blood coagulation|vasodilation	oas04022,oas04071,oas04080,oas04610,oas04750,oas04810,oas05142,oas05143,oas05200	cGMP-PKG signaling pathway|Sphingolipid signaling pathway|Neuroactive ligand-receptor interaction|Complement and coagulation cascades|Inflammatory mediator regulation of TRP channels|Regulation of actin cytoskeleton|Chagas disease (American trypanosomiasis)|African trypanosomiasis|Pathways in cancer
KNL1	56.7872	17.828	95.7464	5.37042	2.42503	3.78245e-09	9.47873e-08	Up	0.169457	0.460565	0.198794	0.0507264	0.0372301	0.0557389	GeneID:101114616	kinetochore scaffold 1
KNSTRN	120.825	76.905	164.745	2.14214	1.09906	1.27459e-05	0.000145744	Up	2.39639	4.02248	2.57755	1.19099	1.10193	1.6173	GeneID:105608916	kinetochore localized astrin (SPAG5) binding protein	GO:0000070,GO:0000776,GO:0000777,GO:0000922,GO:0005634,GO:0005829,GO:0007051,GO:0007059,GO:0015630,GO:0035371,GO:0051301,GO:0051988,GO:0072686	mitotic sister chromatid segregation|kinetochore|condensed chromosome kinetochore|spindle pole|nucleus|cytosol|spindle organization|chromosome segregation|microtubule cytoskeleton|microtubule plus-end|cell division|regulation of attachment of spindle microtubules to kinetochore|mitotic spindle
KNTC1	99.4405	52.4767	146.404	2.79031	1.48042	8.2047e-06	9.92289e-05	Up	0.332148	0.962738	0.495494	0.1792	0.250903	0.169341	GeneID:101120018	kinetochore associated 1	GO:0000777,GO:0000922,GO:0005634,GO:0005828,GO:0005829,GO:0005886,GO:0007093,GO:0007096,GO:0015629,GO:0051301,GO:0065003,GO:1990423	condensed chromosome kinetochore|spindle pole|nucleus|kinetochore microtubule|cytosol|plasma membrane|mitotic cell cycle checkpoint|regulation of exit from mitosis|actin cytoskeleton|cell division|protein-containing complex assembly|RZZ complex
L1CAM	76.9614	22.3723	131.55	5.87928	2.55564	1.8887e-18	1.93748e-16	Up	0.705168	0.757972	0.621414	0.108289	0.0890851	0.132589	GeneID:101110032	L1 cell adhesion molecule			oas04360,oas04514	Axon guidance|Cell adhesion molecules (CAMs)
L3MBTL1	76.6031	122.141	31.0647	0.254223	-1.97583	8.55043e-08	1.64757e-06	Down	0.197508	0.0958054	0.231874	0.781561	0.833395	0.315697	GeneID:101104848	L3MBTL histone methyl-lysine binding protein 1	GO:0000785,GO:0000793,GO:0003682,GO:0003700,GO:0005634,GO:0005654,GO:0005886,GO:0006325,GO:0007088,GO:0008270,GO:0030097,GO:0031491,GO:0031493,GO:0032093,GO:0035064,GO:0040029,GO:0042393,GO:0042802,GO:0045652,GO:0045892	chromatin|condensed chromosome|chromatin binding|DNA-binding transcription factor activity|nucleus|nucleoplasm|plasma membrane|chromatin organization|regulation of mitotic nuclear division|zinc ion binding|hemopoiesis|nucleosome binding|nucleosomal histone binding|SAM domain binding|methylated histone binding|regulation of gene expression, epigenetic|histone binding|identical protein binding|regu…
LAG3	339.119	452.357	225.882	0.49938	-1.00179	2.48957e-08	5.38677e-07	Down	3.40284	2.64174	2.94281	6.52521	6.36795	3.9051	GeneID:101109350	lymphocyte activating 3	GO:0003823,GO:0004888,GO:0005886,GO:0007166,GO:0009897,GO:0016021,GO:0019886,GO:0042289,GO:0045085,GO:0045954,GO:0050868	antigen binding|transmembrane signaling receptor activity|plasma membrane|cell surface receptor signaling pathway|external side of plasma membrane|integral component of membrane|antigen processing and presentation of exogenous peptide antigen via MHC class II|MHC class II protein binding|negative regulation of interleukin-2 biosynthetic process|positive regulation of natural killer cell mediated …
LAMC2	661.313	916.491	406.135	0.44312	-1.17423	1.42736e-17	1.33899e-15	Down	2.80721	3.03757	3.20539	7.32684	6.84858	4.88551	GeneID:100216328	laminin subunit gamma 2	GO:0005604,GO:0007155,GO:0008201,GO:0048731,GO:0070831	basement membrane|cell adhesion|heparin binding|system development|basement membrane assembly	oas04151,oas04510,oas04512,oas05145,oas05146,oas05165,oas05200,oas05222	PI3K-Akt signaling pathway|Focal adhesion|ECM-receptor interaction|Toxoplasmosis|Amoebiasis|Human papillomavirus infection|Pathways in cancer|Small cell lung cancer
LAMC3	31.7953	53.1892	10.4015	0.195922	-2.35165	7.84596e-07	1.24547e-05	Down	0.067411	0.0627341	0.0181594	0.231687	0.315498	0.160387	GeneID:101122429	laminin subunit gamma 3	GO:0000904,GO:0005198,GO:0005576,GO:0005604,GO:0007155,GO:0007601,GO:0014002,GO:0016020,GO:0030198,GO:0031012,GO:0060041	cell morphogenesis involved in differentiation|structural molecule activity|extracellular region|basement membrane|cell adhesion|visual perception|astrocyte development|membrane|extracellular matrix organization|extracellular matrix|retina development in camera-type eye	oas04151,oas04510,oas04512,oas05145,oas05146,oas05165,oas05200,oas05222	PI3K-Akt signaling pathway|Focal adhesion|ECM-receptor interaction|Toxoplasmosis|Amoebiasis|Human papillomavirus infection|Pathways in cancer|Small cell lung cancer
LCTL	472.496	673.085	271.906	0.403853	-1.3081	5.45681e-16	4.25184e-14	Down	4.33415	3.09959	5.43513	9.97017	9.17668	10.5456	GeneID:101102566	lactase like	GO:0005783,GO:0005789,GO:0005903,GO:0005975,GO:0008422,GO:0016021	endoplasmic reticulum|endoplasmic reticulum membrane|brush border|carbohydrate metabolic process|beta-glucosidase activity|integral component of membrane
LGALS4	165.003	234.496	95.5102	0.407363	-1.29561	2.16829e-06	3.0371e-05	Down	1.94932	1.46999	1.53894	4.29004	5.16636	1.92085	GeneID:101112503	galectin 4	GO:0030246	carbohydrate binding
LGI3	20.3509	8.73985	31.962	3.65636	1.87041	0.000375598	0.00277924	Up	0.189071	0.324257	0.252117	0.0467875	0.0633954	0.0848278	GeneID:101122581	leucine rich repeat LGI family member 3	GO:0003824,GO:0005576,GO:0006887,GO:0008021,GO:0017157,GO:0030054,GO:0043005	catalytic activity|extracellular region|exocytosis|synaptic vesicle|regulation of exocytosis|cell junction|neuron projection
LIMCH1	7.46014	1.0512	13.8691	13.2195	3.72459	0.00108029	0.00675903	Up	0.0865777	0.0448895	0.0209903	0.00357074	0.00725735	0	GeneID:101117845	LIM and calponin homology domains 1	GO:0001725,GO:0001934,GO:0003779,GO:0005737,GO:0030336,GO:0031032,GO:0032034,GO:0046872,GO:0051496,GO:0051893	stress fiber|positive regulation of protein phosphorylation|actin binding|cytoplasm|negative regulation of cell migration|actomyosin structure organization|myosin II head/neck binding|metal ion binding|positive regulation of stress fiber assembly|regulation of focal adhesion assembly
LOC101102344	10.6934	4.89395	16.4928	3.3677	1.75176	0.0129058	0.0515039	Up	0.539648	0.466336	0.872234	0.148379	0.150786	0.220106	GeneID:101102344	histone H2A type 1	GO:0000786,GO:0000790,GO:0003677,GO:0006325,GO:0046982	nucleosome|nuclear chromatin|DNA binding|chromatin organization|protein heterodimerization activity	oas04217,oas05034,oas05322	Necroptosis|Alcoholism|Systemic lupus erythematosus
LOC101102413	2.4299	4.54497	0.314823	0.0748254	-3.74033	0.0318145	0.103619	Down	0	0.019219	0	0.158993	0.040393	0.0589625	GeneID:101102413	haptoglobin	GO:0002376,GO:0005615,GO:0006953,GO:0016209,GO:0030492,GO:0042742	immune system process|extracellular space|acute-phase response|antioxidant activity|hemoglobin binding|defense response to bacterium
LOC101102485	7.24054	2.79966	11.6814	4.17579	2.06205	0.0199433	0.0723407	Up	0.27365	0.192603	0.130088	0.0663894	0.0505999	0.0164137	GeneID:101102485	tyrosine-protein kinase Tec	GO:0002250,GO:0004715,GO:0005524,GO:0005829,GO:0005856,GO:0005886,GO:0005911,GO:0007229,GO:0008289,GO:0010543,GO:0018108,GO:0035556,GO:0038083,GO:0042246,GO:0046872,GO:0050731,GO:0050852,GO:0050853	adaptive immune response|non-membrane spanning protein tyrosine kinase activity|ATP binding|cytosol|cytoskeleton|plasma membrane|cell-cell junction|integrin-mediated signaling pathway|lipid binding|regulation of platelet activation|peptidyl-tyrosine phosphorylation|intracellular signal transduction|peptidyl-tyrosine autophosphorylation|tissue regeneration|metal ion binding|positive regulation of …	oas04380,oas04660	Osteoclast differentiation|T cell receptor signaling pathway
LOC101103335	11.4562	1.39687	21.5155	15.3862	3.94356	2.56766e-05	0.000268222	Up	0.268631	0.147779	0.215222	0	0.00970599	0.028336	GeneID:101103335	transcription factor CP2-like protein 1	GO:0000122,GO:0000902,GO:0000977,GO:0001227,GO:0001650,GO:0002070,GO:0003700,GO:0005634,GO:0005667,GO:0005737,GO:0005739,GO:0006357,GO:0007028,GO:0007431,GO:0008340,GO:0016020,GO:0043565,GO:0045927	negative regulation of transcription by RNA polymerase II|cell morphogenesis|RNA polymerase II regulatory region sequence-specific DNA binding|DNA-binding transcription repressor activity, RNA polymerase II-specific|fibrillar center|epithelial cell maturation|DNA-binding transcription factor activity|nucleus|transcription factor complex|cytoplasm|mitochondrion|regulation of transcription by RNA p…
LOC101104705	187.91	282.826	92.9943	0.328814	-1.60466	0.00384645	0.0195741	Down	0.930078	1.72595	1.14834	4.32876	4.99454	1.50159	GeneID:101104705	plasminogen activator inhibitor 2-like	GO:0004867,GO:0005576,GO:0005615,GO:0005737,GO:0005886,GO:0010951,GO:0035722,GO:0042060,GO:0042730,GO:0043066	serine-type endopeptidase inhibitor activity|extracellular region|extracellular space|cytoplasm|plasma membrane|negative regulation of endopeptidase activity|interleukin-12-mediated signaling pathway|wound healing|fibrinolysis|negative regulation of apoptotic process	oas04610	Complement and coagulation cascades
LOC101105036	20.2389	12.6023	27.8755	2.21229	1.14554	0.028502	0.0949334	Up	1.00111	1.24774	1.43268	0.344074	0.87414	0.340266	GeneID:101105036	histone H2A type 1	GO:0000786,GO:0000790,GO:0003677,GO:0006325,GO:0046982	nucleosome|nuclear chromatin|DNA binding|chromatin organization|protein heterodimerization activity	oas04217,oas05034,oas05322	Necroptosis|Alcoholism|Systemic lupus erythematosus
LOC101105064	1660.19	2282.53	1037.85	0.454696	-1.13703	3.82218e-18	3.78476e-16	Down	17.2673	22.5908	19.3915	46.48	44.2313	30.9134	GeneID:101105064	purine nucleoside phosphorylase	GO:0004731,GO:0005737,GO:0005856,GO:0009116	purine-nucleoside phosphorylase activity|cytoplasm|cytoskeleton|nucleoside metabolic process	oas00230,oas00240,oas00760	Purine metabolism|Pyrimidine metabolism|Nicotinate and nicotinamide metabolism
LOC101106662	15.2466	5.9347	24.5585	4.13321	2.04726	0.0169327	0.0638234	Up	0.479474	0.382464	2.85772	0.346063	0	0.488906	GeneID:101106662	NADH dehydrogenase [ubiquinone] 1 beta subcomplex subunit 3	GO:0005747,GO:0016021,GO:0022900,GO:0032981	mitochondrial respiratory chain complex I|integral component of membrane|electron transport chain|mitochondrial respiratory chain complex I assembly	oas00190,oas04714,oas04723,oas04932,oas05010,oas05012,oas05016	Oxidative phosphorylation|Thermogenesis|Retrograde endocannabinoid signaling|Non-alcoholic fatty liver disease (NAFLD)|Alzheimer disease|Parkinson disease|Huntington disease
LOC101108131	85759.8	124465	47054.4	0.378052	-1.40334	1.06944e-43	1.27076e-40	Down	267.26	216.855	300.116	609.711	612.348	711.073	GeneID:101108131	complement C3	GO:0001934,GO:0004866,GO:0005615,GO:0006631,GO:0006954,GO:0006957,GO:0006958,GO:0010828,GO:0010866,GO:0010884,GO:0031715,GO:0045745	positive regulation of protein phosphorylation|endopeptidase inhibitor activity|extracellular space|fatty acid metabolic process|inflammatory response|complement activation, alternative pathway|complement activation, classical pathway|positive regulation of glucose transmembrane transport|regulation of triglyceride biosynthetic process|positive regulation of lipid storage|C5L2 anaphylatoxin chemo…	oas04080,oas04145,oas04610,oas05133,oas05134,oas05140,oas05142,oas05150,oas05152,oas05167,oas05168,oas05203,oas05322	Neuroactive ligand-receptor interaction|Phagosome|Complement and coagulation cascades|Pertussis|Legionellosis|Leishmaniasis|Chagas disease (American trypanosomiasis)|Staphylococcus aureus infection|Tuberculosis|Kaposi sarcoma-associated herpesvirus infection|Herpes simplex virus 1 infection|Viral carcinogenesis|Systemic lupus erythematosus
LOC101108705	13.5664	6.29385	20.8391	3.31222	1.7278	0.00586794	0.0274691	Up	0.222477	0.239577	0.125857	0.0458784	0.0559473	0.063519	GeneID:101108705	glutathione S-transferase Mu 1-like	GO:0004364,GO:0005737	glutathione transferase activity|cytoplasm	oas00480,oas00980,oas00982,oas00983,oas01524,oas05200,oas05204,oas05225,oas05418	Glutathione metabolism|Metabolism of xenobiotics by cytochrome P450|Drug metabolism - cytochrome P450|Drug metabolism - other enzymes|Platinum drug resistance|Pathways in cancer|Chemical carcinogenesis|Hepatocellular carcinoma|Fluid shear stress and atherosclerosis
LOC101108756	8.18237	2.79568	13.5691	4.85414	2.27922	0.00747843	0.0332103	Up	0.132948	0.111631	0.0565484	0.0144295	0.0146636	0.0285396	GeneID:101108756	feline leukemia virus subgroup C receptor-related protein 2	GO:0005886,GO:0015232,GO:0016021,GO:0020037,GO:0097037	plasma membrane|heme transporter activity|integral component of membrane|heme binding|heme export
LOC101108797	5.13783	1.39867	8.877	6.34436	2.66547	0.0247746	0.0852463	Up	0.26204	0.435464	0.529419	0.180123	0	0	GeneID:101108797	hemoglobin subunit alpha-1/2	GO:0005344,GO:0005506,GO:0005833,GO:0019825,GO:0020037	oxygen carrier activity|iron ion binding|hemoglobin complex|oxygen binding|heme binding	oas05143,oas05144	African trypanosomiasis|Malaria
LOC101109397	86.8284	55.5875	118.069	2.12364	1.08654	2.29084e-05	0.000242863	Up	3.54064	4.06146	4.1148	1.29228	1.67439	2.17256	GeneID:101109397	histone H1.3	GO:0000122,GO:0000786,GO:0003690,GO:0005634,GO:0005719,GO:0006334,GO:0006355,GO:0016584,GO:0030261,GO:0031492,GO:0031936,GO:0035327,GO:0045910,GO:0080182,GO:0098532	negative regulation of transcription by RNA polymerase II|nucleosome|double-stranded DNA binding|nucleus|nuclear euchromatin|nucleosome assembly|regulation of transcription, DNA-templated|nucleosome positioning|chromosome condensation|nucleosomal DNA binding|negative regulation of chromatin silencing|transcriptionally active chromatin|negative regulation of DNA recombination|histone H3-K4 trimeth…
LOC101109746	104.771	63.6484	145.894	2.29211	1.19668	3.90746e-08	8.12194e-07	Up	2.66898	2.52475	2.71346	1.11136	1.07561	1.02928	GeneID:101109746	HLA class II histocompatibility antigen, DM beta chain	GO:0002399,GO:0002503,GO:0005765,GO:0006955,GO:0016021,GO:0019886,GO:0023026,GO:0031902,GO:0042102,GO:0042613,GO:2001190	MHC class II protein complex assembly|peptide antigen assembly with MHC class II protein complex|lysosomal membrane|immune response|integral component of membrane|antigen processing and presentation of exogenous peptide antigen via MHC class II|MHC class II protein complex binding|late endosome membrane|positive regulation of T cell proliferation|MHC class II protein complex|positive regulation o…	oas04145,oas04514,oas04612,oas04640,oas04658,oas04659,oas04672,oas04940,oas05140,oas05145,oas05150,oas05152,oas05164,oas05166,oas05168,oas05169,oas05310,oas05320,oas05321,oas05322,oas05323,oas05330,oas05332,oas05416	Phagosome|Cell adhesion molecules (CAMs)|Antigen processing and presentation|Hematopoietic cell lineage|Th1 and Th2 cell differentiation|Th17 cell differentiation|Intestinal immune network for IgA production|Type I diabetes mellitus|Leishmaniasis|Toxoplasmosis|Staphylococcus aureus infection|Tuberculosis|Influenza A|Human T-cell leukemia virus 1 infection|Herpes simplex virus 1 infection|Epstein-…
LOC101110432	34.9322	55.6344	14.23	0.25587	-1.96652	3.17491e-06	4.23489e-05	Down	0.24109	0.351338	0.243546	1.20467	1.22422	0.624036	GeneID:101110432	kazrin	GO:0001533,GO:0005654,GO:0005829,GO:0005856,GO:0016607,GO:0030057,GO:0070268	cornified envelope|nucleoplasm|cytosol|cytoskeleton|nuclear speck|desmosome|cornification
LOC101110922	25.8973	38.8465	12.9481	0.333547	-1.58404	0.00380159	0.0194081	Down	0.155439	0.199269	0.100943	0.663976	0.476977	0.135854	GeneID:101110922	cytochrome P450 26B1	GO:0001709,GO:0001768,GO:0001972,GO:0005506,GO:0005789,GO:0006805,GO:0006954,GO:0007140,GO:0007283,GO:0008401,GO:0009954,GO:0010628,GO:0016125,GO:0016709,GO:0020037,GO:0030326,GO:0031090,GO:0034653,GO:0043587,GO:0045580,GO:0048384,GO:0048387,GO:0055114,GO:0060349,GO:0061436,GO:0070268,GO:0071300,GO:2001037	cell fate determination|establishment of T cell polarity|retinoic acid binding|iron ion binding|endoplasmic reticulum membrane|xenobiotic metabolic process|inflammatory response|male meiotic nuclear division|spermatogenesis|retinoic acid 4-hydroxylase activity|proximal/distal pattern formation|positive regulation of gene expression|sterol metabolic process|oxidoreductase activity, acting on paire…	oas00830	Retinol metabolism
LOC101111623	32.9392	50.3694	15.5089	0.30788	-1.69956	9.9312e-05	0.000869726	Down	0.0262412	0.0817654	0.0530171	0.12852	0.199344	0.160544	GeneID:101111623	AF4/FMR2 family member 3
LOC101112084	48.6756	68.9051	28.4462	0.41302	-1.27572	0.000106663	0.000928516	Down	0.290147	0.192869	0.187886	0.559975	0.530083	0.424816	GeneID:101112084	cationic amino acid transporter 3-like	GO:0000064,GO:0005886,GO:0006865,GO:0015171,GO:0015181,GO:0015189,GO:0016021,GO:0097638,GO:1903352	L-ornithine transmembrane transporter activity|plasma membrane|amino acid transport|amino acid transmembrane transporter activity|arginine transmembrane transporter activity|L-lysine transmembrane transporter activity|integral component of membrane|L-arginine import across plasma membrane|L-ornithine transmembrane transport
LOC101112122	134.402	76.8653	191.939	2.49671	1.32003	1.78518e-06	2.57119e-05	Up	0.762557	1.02481	0.732647	0.256388	0.195411	0.485973	GeneID:101112122	2'-5'-oligoadenylate synthase 1-like	GO:0001730,GO:0003725,GO:0005524,GO:0005576,GO:0005634,GO:0005654,GO:0005737,GO:0005739,GO:0005783,GO:0005829,GO:0006164,GO:0045071,GO:0045087,GO:0046872,GO:0051607,GO:0060700	2'-5'-oligoadenylate synthetase activity|double-stranded RNA binding|ATP binding|extracellular region|nucleus|nucleoplasm|cytoplasm|mitochondrion|endoplasmic reticulum|cytosol|purine nucleotide biosynthetic process|negative regulation of viral genome replication|innate immune response|metal ion binding|defense response to virus|regulation of ribonuclease activity	oas04621,oas05160,oas05162,oas05164,oas05168,oas05169	NOD-like receptor signaling pathway|Hepatitis C|Measles|Influenza A|Herpes simplex virus 1 infection|Epstein-Barr virus infection
LOC101112261	7.23441	2.4478	12.021	4.91094	2.296	0.0204376	0.0736281	Up	0.0438153	0.251206	0.12172	0.0564714	0.0114775	0.0111693	GeneID:101112261	DEP domain-containing protein 1B	GO:0005096,GO:0005622,GO:0035556	GTPase activator activity|intracellular|intracellular signal transduction
LOC101112306	168.478	96.8469	240.108	2.47913	1.30984	7.59464e-12	3.08524e-10	Up	0.921314	1.16227	0.963073	0.417152	0.323186	0.404367	GeneID:101112306	sterile alpha motif domain-containing protein 9	GO:0005737,GO:0005829,GO:0034058,GO:0043231	cytoplasm|cytosol|endosomal vesicle fusion|intracellular membrane-bounded organelle
LOC101112563	83.211	131.206	35.2164	0.268177	-1.89874	9.62779e-10	2.74017e-08	Down	0.20082	0.336761	0.479502	1.05413	1.54947	0.940084	GeneID:101112563	intercellular adhesion molecule 1-like	GO:0005178,GO:0005887,GO:0007155,GO:0098609	integrin binding|integral component of plasma membrane|cell adhesion|cell-cell adhesion	oas04064,oas04514,oas04650,oas04668,oas04670,oas04933,oas05143,oas05144,oas05150,oas05164,oas05166,oas05167,oas05169,oas05323,oas05416,oas05418	NF-kappa B signaling pathway|Cell adhesion molecules (CAMs)|Natural killer cell mediated cytotoxicity|TNF signaling pathway|Leukocyte transendothelial migration|AGE-RAGE signaling pathway in diabetic complications|African trypanosomiasis|Malaria|Staphylococcus aureus infection|Influenza A|Human T-cell leukemia virus 1 infection|Kaposi sarcoma-associated herpesvirus infection|Epstein-Barr virus in…
LOC101112695	5.71755	10.4919	0.943186	0.0902899	-3.46929	0.00363931	0.0187499	Down	0.0251249	0.0125259	0	0.220199	0.0921413	0.0768574	GeneID:101112695	disintegrin and metalloproteinase domain-containing protein 30-like	GO:0004222,GO:0005886,GO:0007339,GO:0008237,GO:0008270,GO:0009897,GO:0016021,GO:0031902,GO:1990913	metalloendopeptidase activity|plasma membrane|binding of sperm to zona pellucida|metallopeptidase activity|zinc ion binding|external side of plasma membrane|integral component of membrane|late endosome membrane|sperm head plasma membrane
LOC101112891	2.09318	4.18637	0	0.0416979	-4.58388	0.0245247	0.0845905	Down	0	0	0	0.0103344	0	0.0511001	GeneID:101112891	complement C4-like			oas04610,oas05133,oas05150,oas05322	Complement and coagulation cascades|Pertussis|Staphylococcus aureus infection|Systemic lupus erythematosus
LOC101113487	6.7705	2.79664	10.7444	3.84216	1.94192	0.0269599	0.0909013	Up	0.0792542	0.0620902	0.0514682	0.0175109	0.0118633	0.0173171	GeneID:101113487	neuronal-specific septin-3	GO:0000281,GO:0000921,GO:0003924,GO:0005525,GO:0005829,GO:0005940,GO:0015630,GO:0030054,GO:0031105,GO:0032160,GO:0032947,GO:0042734,GO:0042802,GO:0043005,GO:0060271,GO:0098793,GO:0099569	mitotic cytokinesis|septin ring assembly|GTPase activity|GTP binding|cytosol|septin ring|microtubule cytoskeleton|cell junction|septin complex|septin filament array|protein-containing complex scaffold activity|presynaptic membrane|identical protein binding|neuron projection|cilium assembly|presynapse|presynaptic cytoskeleton	oas05100	Bacterial invasion of epithelial cells
LOC101113538	41.556	65.084	18.0279	0.277062	-1.85172	8.27963e-06	9.9881e-05	Down	0.547831	0.819358	0.588001	2.9655	2.51135	1.11722	GeneID:101113538	acyl-coenzyme A thioesterase THEM4-like	GO:0005743,GO:0005758,GO:0006631,GO:0006915,GO:0016290,GO:0032587,GO:0102991	mitochondrial inner membrane|mitochondrial intermembrane space|fatty acid metabolic process|apoptotic process|palmitoyl-CoA hydrolase activity|ruffle membrane|myristoyl-CoA hydrolase activity
LOC101114063	109.635	72.3719	146.897	2.02933	1.02101	3.89235e-06	5.06859e-05	Up	1.6101	1.38329	1.71857	0.699558	0.647245	0.815725	GeneID:101114063	nucleolin-like	GO:0003723,GO:0005730,GO:0005737,GO:0042162,GO:1990904	RNA binding|nucleolus|cytoplasm|telomeric DNA binding|ribonucleoprotein complex
LOC101114743	17.2376	23.0822	11.393	0.493556	-1.01871	0.0490005	0.142912	Down	0.269734	0.37653	0.326979	0.528423	0.678312	0.632592	GeneID:101114743	platelet-activating factor receptor-like	GO:0016021	integral component of membrane
LOC101114861	17.7653	10.841	24.6895	2.27721	1.18727	0.0209075	0.0749044	Up	0.267372	0.32455	0.317069	0.131848	0.121806	0.118535	GeneID:101114861	platelet glycoprotein 4-like	GO:0005794,GO:0006955,GO:0007155,GO:0007166,GO:0007204,GO:0016020,GO:0016021,GO:0016324,GO:0030299,GO:0031526,GO:0031623,GO:0033993,GO:0034197,GO:0044539,GO:0045121,GO:0050702,GO:0050892,GO:0050909,GO:0070374,GO:0070508,GO:0070542,GO:0070543,GO:0071404,GO:0071726,GO:0097009,GO:1900227,GO:1990000	Golgi apparatus|immune response|cell adhesion|cell surface receptor signaling pathway|positive regulation of cytosolic calcium ion concentration|membrane|integral component of membrane|apical plasma membrane|intestinal cholesterol absorption|brush border membrane|receptor internalization|response to lipid|triglyceride transport|long-chain fatty acid import|membrane raft|interleukin-1 beta secreti…	oas03320,oas04145,oas04152,oas04512,oas04640,oas04920,oas04931,oas04975,oas04979,oas05144	PPAR signaling pathway|Phagosome|AMPK signaling pathway|ECM-receptor interaction|Hematopoietic cell lineage|Adipocytokine signaling pathway|Insulin resistance|Fat digestion and absorption|Cholesterol metabolism|Malaria
LOC101115808	15.3455	6.64956	24.0415	3.61706	1.85482	0.00182838	0.0104464	Up	0.113994	0.113663	0.106297	0.0361652	0.036752	0.0134119	GeneID:101115808	ATP-binding cassette sub-family A member 9			oas02010	ABC transporters
LOC101116059	6.7047	11.2021	2.20732	0.197444	-2.34049	0.0132969	0.0527253	Down	0.0180405	0.017988	0.00607475	0.0682043	0.100816	0.0306589	GeneID:101116059	clathrin coat assembly protein AP180	GO:0005545,GO:0005886,GO:0005905,GO:0015031,GO:0019901,GO:0030136,GO:0030276,GO:0048268,GO:2000369	1-phosphatidylinositol binding|plasma membrane|clathrin-coated pit|protein transport|protein kinase binding|clathrin-coated vesicle|clathrin binding|clathrin coat assembly|regulation of clathrin-dependent endocytosis
LOC101117316	13.4622	6.6354	20.289	3.055	1.61117	0.0175717	0.0656591	Up	0.0529573	0.110007	0.120368	0.0182011	0.0138723	0.053999	GeneID:101117316	antigen WC1.1-like	GO:0005044,GO:0005576,GO:0009897	scavenger receptor activity|extracellular region|external side of plasma membrane	oas04970	Salivary secretion
LOC101117691	5.59233	1.39481	9.78984	7.00974	2.80936	0.0222703	0.0785439	Up	0.268124	1.40356	0.406283	0	0	0.273398	GeneID:101117691	metallothionein-1C-like			oas04978	Mineral absorption
[truncated: 350 more rows]
