# Supplementary material for: Molecular Mechanism of m6A Methylation Modification Genes METTL3 and FTO in Regulating Heat Stress in Sheep
Source: Int J Mol Sci. 2023 Jul 25;24(15):11926. doi: 10.3390/ijms241511926 (PMC10419070; doi:10.3390/ijms241511926)
Supplement: Supplementary file 1 [file ijms-24-11926-s001.zip › Supplements Tables S1-S7/Table S4.xlsx]

## Sheet: FTO_sR-vs-NC
gene_id	BaseMean_DESeq2	BaseMean_control_NC	BaseMean_case_FTO_sR	FoldChange	log2FoldChange	p-value	q-value	Regulation	Expression_FTO_sR1	Expression_FTO_sR2	Expression_FTO_sR3	Expression_NC1	Expression_NC2	Expression_NC3	gene_Dbxref	description	GO_id	GO_term	pathway	pathway_description
ABCA12	69.9591	34.2261	105.692	3.08827	1.6268	7.10976e-09	2.87958e-07	Up	0.241466	0.35681	0.353401	0.114635	0.0919698	0.110383	GeneID:101104887	ATP binding cassette subfamily A member 12			oas02010	ABC transporters
ABI3BP	5790.77	3301.46	8280.08	2.50806	1.32657	1.37035e-40	1.02927e-37	Up	31.5427	35.5163	40.5539	16.0992	15.6835	12.4079	GeneID:101108803	ABI family member 3 binding protein	GO:0005201,GO:0005518,GO:0005576,GO:0005614,GO:0005615,GO:0008201,GO:0010811,GO:0030198,GO:0062023	extracellular matrix structural constituent|collagen binding|extracellular region|interstitial matrix|extracellular space|heparin binding|positive regulation of cell-substrate adhesion|extracellular matrix organization|collagen-containing extracellular matrix
ABLIM1	34.6244	22.82	46.4288	2.03466	1.02479	0.00698212	0.0409207	Up	0.0807356	0.150714	0.124602	0.0539794	0.0626916	0.0635501	GeneID:101102193	actin binding LIM protein 1	GO:0001725,GO:0003779,GO:0005737,GO:0007010,GO:0007411,GO:0014069,GO:0015629,GO:0030027,GO:0030032,GO:0045944,GO:0046872,GO:0051015,GO:0060271	stress fiber|actin binding|cytoplasm|cytoskeleton organization|axon guidance|postsynaptic density|actin cytoskeleton|lamellipodium|lamellipodium assembly|positive regulation of transcription by RNA polymerase II|metal ion binding|actin filament binding|cilium assembly	oas04360	Axon guidance
ACKR1	18.5643	30.6587	6.4699	0.210554	-2.24774	0.000100401	0.0013607	Down	0.0832553	0.0934515	0.0207459	0.369768	0.386205	0.213311	GeneID:101113185	atypical chemokine receptor 1 (Duffy blood group)	GO:0004930,GO:0005769,GO:0006954,GO:0016021,GO:0019957,GO:0032642,GO:0055037,GO:0070098	G protein-coupled receptor activity|early endosome|inflammatory response|integral component of membrane|C-C chemokine binding|regulation of chemokine production|recycling endosome|chemokine-mediated signaling pathway	oas05144	Malaria
ACOD1	21.4945	3.58645	39.4026	10.9834	3.45725	2.32009e-08	8.40832e-07	Up	0.480182	0.5869	0.323066	0.0829372	0.0240808	0.0234341	GeneID:101102743	aconitate decarboxylase 1	GO:0002760,GO:0005739,GO:0006952,GO:0006954,GO:0007566,GO:0019679,GO:0032088,GO:0032480,GO:0034136,GO:0034144,GO:0035458,GO:0045824,GO:0047547,GO:0047613,GO:0050728,GO:0071219,GO:0071222,GO:0071346,GO:0071347,GO:0071356,GO:0071393,GO:0072573,GO:2000379	positive regulation of antimicrobial humoral response|mitochondrion|defense response|inflammatory response|embryo implantation|propionate metabolic process, methylcitrate cycle|negative regulation of NF-kappaB transcription factor activity|negative regulation of type I interferon production|negative regulation of toll-like receptor 2 signaling pathway|negative regulation of toll-like receptor 4 s…
ACTRT3	7.0714	11.0915	3.05126	0.275115	-1.86189	0.0394405	0.145216	Down	0.104031	0.0207593	0.0622148	0.369631	0.250419	0.0812314	GeneID:101120792	actin related protein T3	GO:0001673,GO:0005737,GO:0005856	male germ cell nucleus|cytoplasm|cytoskeleton
ADORA2A	14.1738	20.5394	7.8082	0.379907	-1.39628	0.0171351	0.079461	Down	0.0600015	0.109755	0.0598057	0.266489	0.180542	0.175693	GeneID:101112926	adenosine A2a receptor	GO:0001609,GO:0001963,GO:0001975,GO:0005622,GO:0005887,GO:0007189,GO:0007626,GO:0019899,GO:0032230,GO:0042755,GO:0042802,GO:0046636,GO:0050728,GO:0060080,GO:0098794,GO:2001235	G protein-coupled adenosine receptor activity|synaptic transmission, dopaminergic|response to amphetamine|intracellular|integral component of plasma membrane|adenylate cyclase-activating G protein-coupled receptor signaling pathway|locomotory behavior|enzyme binding|positive regulation of synaptic transmission, GABAergic|eating behavior|identical protein binding|negative regulation of alpha-beta …	oas04015,oas04020,oas04024,oas04080,oas04270,oas05012,oas05034	Rap1 signaling pathway|Calcium signaling pathway|cAMP signaling pathway|Neuroactive ligand-receptor interaction|Vascular smooth muscle contraction|Parkinson disease|Alcoholism
ADRB2	42.0345	24.1228	59.9461	2.48547	1.31352	0.00012228	0.00161281	Up	1.23173	1.20662	1.5179	0.397861	0.606474	0.633905	GeneID:100170320	adrenoceptor beta 2	GO:0001540,GO:0002024,GO:0002025,GO:0002028,GO:0002032,GO:0004935,GO:0004941,GO:0005634,GO:0005769,GO:0005887,GO:0006898,GO:0007188,GO:0007190,GO:0008179,GO:0009409,GO:0010739,GO:0015459,GO:0016324,GO:0030501,GO:0031398,GO:0031649,GO:0040015,GO:0042803,GO:0043235,GO:0043410,GO:0044877,GO:0045453,GO:0045944,GO:0045986,GO:0050873,GO:0051379,GO:0051380,GO:0061885,GO:0071880,GO:0071902,GO:0120162,GO:…	amyloid-beta binding|diet induced thermogenesis|norepinephrine-epinephrine-mediated vasodilation involved in regulation of systemic arterial blood pressure|regulation of sodium ion transport|desensitization of G protein-coupled receptor signaling pathway by arrestin|adrenergic receptor activity|beta2-adrenergic receptor activity|nucleus|early endosome|integral component of plasma membrane|recepto…	oas04020,oas04022,oas04024,oas04080,oas04261,oas04923,oas04924,oas04970	Calcium signaling pathway|cGMP-PKG signaling pathway|cAMP signaling pathway|Neuroactive ligand-receptor interaction|Adrenergic signaling in cardiomyocytes|Regulation of lipolysis in adipocytes|Renin secretion|Salivary secretion
AGER	45.5974	61.3134	29.8814	0.487106	-1.03769	0.00316127	0.0220933	Down	0.377083	0.578823	0.318029	1.04494	1.0328	0.622858	GeneID:101111586	advanced glycosylation end-product specific receptor	GO:0006954,GO:0016021	inflammatory response|integral component of membrane	oas04933	AGE-RAGE signaling pathway in diabetic complications
AGRP	23.267	40.773	5.76102	0.141326	-2.8229	3.30819e-06	7.28568e-05	Down	0.113602	0.136016	0.135878	1.61456	0.865956	0.332645	GeneID:443269	agouti related neuropeptide	GO:0005184,GO:0005615,GO:0005796,GO:0007218,GO:0009755,GO:0031781,GO:0031782,GO:0060259	neuropeptide hormone activity|extracellular space|Golgi lumen|neuropeptide signaling pathway|hormone-mediated signaling pathway|type 3 melanocortin receptor binding|type 4 melanocortin receptor binding|regulation of feeding behavior	oas04920	Adipocytokine signaling pathway
AJM1	11.1479	19.2445	3.05126	0.158556	-2.65694	0.000412034	0.00435888	Down	0.023897	0.00476865	0.0142914	0.0896256	0.124636	0.0653092	GeneID:106990977	apical junction component 1 homolog	GO:0005912,GO:0005929,GO:0016324,GO:0045216	adherens junction|cilium|apical plasma membrane|cell-cell junction organization
AKAP12	514.74	299.2	730.28	2.44071	1.2873	3.05056e-22	6.59615e-20	Up	2.15632	2.29852	2.43671	0.82536	0.903023	1.17587	GeneID:101105509	A-kinase anchoring protein 12
AKNA	284.478	418.668	150.288	0.358882	-1.47842	8.87695e-21	1.60358e-18	Down	0.875044	0.72414	0.67723	2.4182	2.28191	1.8388	GeneID:101118854	AT-hook transcription factor	GO:0000978,GO:0000981,GO:0001077,GO:0001650,GO:0005654,GO:0005813,GO:0005829,GO:0016020,GO:0043231,GO:0045944	RNA polymerase II proximal promoter sequence-specific DNA binding|DNA-binding transcription factor activity, RNA polymerase II-specific|proximal promoter DNA-binding transcription activator activity, RNA polymerase II-specific|fibrillar center|nucleoplasm|centrosome|cytosol|membrane|intracellular membrane-bounded organelle|positive regulation of transcription by RNA polymerase II
ALCAM	244.819	161.658	327.98	2.02886	1.02067	6.75859e-10	3.34902e-08	Up	1.86682	1.65186	1.99729	0.794471	0.864621	1.13673	GeneID:101114151	activated leukocyte cell adhesion molecule	GO:0001772,GO:0002250,GO:0005887,GO:0007155,GO:0007157,GO:0030424,GO:0030425,GO:0031226,GO:0031290,GO:0048846,GO:1990138	immunological synapse|adaptive immune response|integral component of plasma membrane|cell adhesion|heterophilic cell-cell adhesion via plasma membrane cell adhesion molecules|axon|dendrite|intrinsic component of plasma membrane|retinal ganglion cell axon guidance|axon extension involved in axon guidance|neuron projection extension	oas04514	Cell adhesion molecules (CAMs)
ALS2CL	95.4607	52.8061	138.115	2.6148	1.3867	8.9529e-09	3.54908e-07	Up	0.778436	0.83177	0.632824	0.234303	0.304552	0.344871	GeneID:101116432	ALS2 C-terminal like	GO:0005096,GO:0005737	GTPase activator activity|cytoplasm
AMER3	14.3818	2.28055	26.4831	11.6034	3.53648	1.94156e-06	4.55724e-05	Up	0.17578	0.123801	0.103063	0.015308	0.00518544	0.0151386	GeneID:101117058	APC membrane recruitment protein 3	GO:0005546,GO:0005886,GO:0008013,GO:0016055,GO:0060828	phosphatidylinositol-4,5-bisphosphate binding|plasma membrane|beta-catenin binding|Wnt signaling pathway|regulation of canonical Wnt signaling pathway
AMIGO2	10.7197	15.6519	5.7874	0.369074	-1.43802	0.0357129	0.135476	Down	0.0644918	0.0965202	0.0214272	0.169738	0.194053	0.146877	GeneID:101111179	adhesion molecule with Ig like domain 2	GO:0005634,GO:0005886,GO:0007156,GO:0007157,GO:0016021,GO:0043066,GO:0043069,GO:0051965	nucleus|plasma membrane|homophilic cell adhesion via plasma membrane adhesion molecules|heterophilic cell-cell adhesion via plasma membrane cell adhesion molecules|integral component of membrane|negative regulation of apoptotic process|negative regulation of programmed cell death|positive regulation of synapse assembly
AMN	23.7573	32.9216	14.5929	0.443025	-1.17454	0.00770755	0.0439275	Down	0.241239	0.333271	0.221955	0.586082	0.576979	0.688271	GeneID:101122221	amnion associated transmembrane protein	GO:0005102,GO:0005615,GO:0005886,GO:0005905,GO:0006898,GO:0007275,GO:0007588,GO:0009235,GO:0010008,GO:0015889,GO:0016021,GO:0016324,GO:0030139,GO:0031526,GO:0032991,GO:0034384,GO:0043001,GO:0070062	signaling receptor binding|extracellular space|plasma membrane|clathrin-coated pit|receptor-mediated endocytosis|multicellular organism development|excretion|cobalamin metabolic process|endosome membrane|cobalamin transport|integral component of membrane|apical plasma membrane|endocytic vesicle|brush border membrane|protein-containing complex|high-density lipoprotein particle clearance|Golgi to p…
ANKRD1	15070	9045.78	21094.1	2.33192	1.22152	2.61269e-34	1.16518e-31	Up	319.268	343.242	344.169	129.131	136.671	178.32	GeneID:100820746	ankyrin repeat domain 1	GO:0001650,GO:0002039,GO:0003677,GO:0003713,GO:0003714,GO:0003779,GO:0005634,GO:0005667,GO:0005737,GO:0005829,GO:0006357,GO:0031432,GO:0031674,GO:0035690,GO:0035914,GO:0035994,GO:0042826,GO:0043065,GO:0043517,GO:0045445,GO:0048471,GO:0050714,GO:0055008,GO:0061629,GO:0070412,GO:0071222,GO:0071260,GO:0071347,GO:0071356,GO:0071560,GO:2000279	fibrillar center|p53 binding|DNA binding|transcription coactivator activity|transcription corepressor activity|actin binding|nucleus|transcription factor complex|cytoplasm|cytosol|regulation of transcription by RNA polymerase II|titin binding|I band|cellular response to drug|skeletal muscle cell differentiation|response to muscle stretch|histone deacetylase binding|positive regulation of apoptoti…
ANO1	152.728	97.4588	207.997	2.13364	1.09332	1.02553e-08	3.99873e-07	Up	1.36561	1.24302	1.05668	0.585236	0.52865	0.654759	GeneID:101116524	anoctamin 1	GO:0005227,GO:0005229,GO:0005247,GO:0005254,GO:0005737,GO:0005886,GO:0006812,GO:0006821,GO:0007200,GO:0007275,GO:0015111,GO:0015705,GO:0016324,GO:0034220,GO:0034605,GO:0034707,GO:0035774,GO:0046983,GO:0050965,GO:0070062,GO:1902476	calcium activated cation channel activity|intracellular calcium activated chloride channel activity|voltage-gated chloride channel activity|chloride channel activity|cytoplasm|plasma membrane|cation transport|chloride transport|phospholipase C-activating G protein-coupled receptor signaling pathway|multicellular organism development|iodide transmembrane transporter activity|iodide transport|apica…
APOD	7.75377	2.93556	12.572	4.28166	2.09817	0.0131425	0.0655792	Up	0.298321	0.487064	0.216253	0.0267668	0.136005	0.0794119	GeneID:101104361	apolipoprotein D	GO:0000302,GO:0005615,GO:0005783,GO:0006006,GO:0006629,GO:0006869,GO:0007420,GO:0007568,GO:0010642,GO:0014012,GO:0015485,GO:0022626,GO:0030425,GO:0042246,GO:0042308,GO:0042493,GO:0043025,GO:0048471,GO:0048662,GO:0048678,GO:0051895,GO:0060588,GO:0071638,GO:1900016,GO:2000098,GO:2000405	response to reactive oxygen species|extracellular space|endoplasmic reticulum|glucose metabolic process|lipid metabolic process|lipid transport|brain development|aging|negative regulation of platelet-derived growth factor receptor signaling pathway|peripheral nervous system axon regeneration|cholesterol binding|cytosolic ribosome|dendrite|tissue regeneration|negative regulation of protein import …
ARHGEF39	15.5189	21.1952	9.84267	0.464175	-1.10726	0.04862	0.16855	Down	0.277933	0.138654	0.158301	0.293906	0.557527	0.426293	GeneID:101115939	Rho guanine nucleotide exchange factor 39	GO:0005089,GO:0005886,GO:0030335,GO:0035023	Rho guanyl-nucleotide exchange factor activity|plasma membrane|positive regulation of cell migration|regulation of Rho protein signal transduction
ASB14	3.53277	0.976429	6.08911	6.23246	2.6398	0.0414396	0.150671	Up	0.047794	0.031791	0.0635175	0.0078619	0	0.0155498	GeneID:101103272	ankyrin repeat and SOCS box containing 14	GO:0005829,GO:0016567,GO:0035556,GO:0043687	cytosol|protein ubiquitination|intracellular signal transduction|post-translational protein modification
ASGR1	21.1935	33.8959	8.49114	0.250271	-1.99844	0.000248819	0.00290343	Down	0.279273	0.0743052	0.111345	0.826903	0.429497	0.654203	GeneID:101116157	asialoglycoprotein receptor 1	GO:0006897,GO:0016021,GO:0030246,GO:0046872	endocytosis|integral component of membrane|carbohydrate binding|metal ion binding	oas04918	Thyroid hormone synthesis
ATP4B	4.88154	1.62678	8.13629	4.99582	2.32072	0.0329869	0.127839	Up	0.158659	0.203532	0.180733	0.0223703	0	0.0884912	GeneID:114116709	ATPase H+/K+ transporting subunit beta	GO:0001671,GO:0005890,GO:0006883,GO:0007155,GO:0010107,GO:0010248,GO:0030007,GO:0036376	ATPase activator activity|sodium:potassium-exchanging ATPase complex|cellular sodium ion homeostasis|cell adhesion|potassium ion import|establishment or maintenance of transmembrane electrochemical gradient|cellular potassium ion homeostasis|sodium ion export across plasma membrane	oas00190,oas04966,oas04971	Oxidative phosphorylation|Collecting duct acid secretion|Gastric acid secretion
AZGP1	14.3862	8.79934	19.9731	2.27029	1.18287	0.0367159	0.137851	Up	0.354654	0.420205	0.530246	0.240648	0.133392	0.21635	GeneID:101123437	alpha-2-glycoprotein 1, zinc-binding	GO:0001580,GO:0005615,GO:0005886,GO:0006955,GO:0007155	detection of chemical stimulus involved in sensory perception of bitter taste|extracellular space|plasma membrane|immune response|cell adhesion
B3GALT1	9.88767	5.21539	14.5599	2.79231	1.48146	0.0293035	0.117139	Up	0.0562264	0.0654499	0.0793942	0.0231225	0.0234976	0.0274399	GeneID:101122666	beta-1,3-galactosyltransferase 1	GO:0000139,GO:0005783,GO:0005794,GO:0006486,GO:0006487,GO:0006682,GO:0008376,GO:0008499,GO:0009312,GO:0016021,GO:0030259,GO:0047275	Golgi membrane|endoplasmic reticulum|Golgi apparatus|protein glycosylation|protein N-linked glycosylation|galactosylceramide biosynthetic process|acetylgalactosaminyltransferase activity|UDP-galactose:beta-N-acetylglucosamine beta-1,3-galactosyltransferase activity|oligosaccharide biosynthetic process|integral component of membrane|lipid glycosylation|glucosaminylgalactosylglucosylceramide beta-g…	oas00601	Glycosphingolipid biosynthesis - lacto and neolacto series
BCAN	10.2467	5.2179	15.2754	2.92696	1.5494	0.022011	0.0956672	Up	0.126161	0.151053	0.100599	0.0498069	0.050615	0.0328372	GeneID:101105963	brevican	GO:0005540,GO:0007155,GO:0007417,GO:0030246,GO:0031012	hyaluronic acid binding|cell adhesion|central nervous system development|carbohydrate binding|extracellular matrix
BECN2	6.23734	2.28449	10.1902	4.46118	2.15742	0.0199057	0.0888009	Up	0.217212	0.281741	0.151552	0.0428765	0.0871443	0.021201	GeneID:101108148	beclin 2	GO:0000045,GO:0000407,GO:0006914,GO:0006995,GO:0008333,GO:0019898,GO:0032258,GO:0034271,GO:0034272,GO:0042593,GO:0044877,GO:0045324,GO:1990172	autophagosome assembly|phagophore assembly site|autophagy|cellular response to nitrogen starvation|endosome to lysosome transport|extrinsic component of membrane|protein localization by the Cvt pathway|phosphatidylinositol 3-kinase complex, class III, type I|phosphatidylinositol 3-kinase complex, class III, type II|glucose homeostasis|protein-containing complex binding|late endosome to vacuole tr…	oas04136,oas04137,oas04140,oas04215,oas04371,oas05167	Autophagy - other|Mitophagy - animal|Autophagy - animal|Apoptosis - multiple species|Apelin signaling pathway|Kaposi sarcoma-associated herpesvirus infection
BEND5	37.2822	51.1789	23.3854	0.45696	-1.12986	0.00182098	0.0144695	Down	0.331894	0.3462	0.360886	0.565804	0.862476	0.912939	GeneID:101107646	BEN domain containing 5	GO:0003677,GO:0005794,GO:0045892	DNA binding|Golgi apparatus|negative regulation of transcription, DNA-templated
BHLHE41	326.409	217.203	435.614	2.00571	1.00412	4.42082e-10	2.24518e-08	Up	3.18225	3.77755	3.50532	1.96501	2.11147	1.30613	GeneID:101112806	basic helix-loop-helix family member e41	GO:0000122,GO:0000977,GO:0000978,GO:0000980,GO:0000981,GO:0001078,GO:0001102,GO:0001227,GO:0001756,GO:0003714,GO:0005634,GO:0007219,GO:0008134,GO:0008283,GO:0009887,GO:0010832,GO:0010944,GO:0030154,GO:0032922,GO:0042803,GO:0042826,GO:0043425,GO:0043426,GO:0043565,GO:0045892,GO:0046982,GO:0050767,GO:0070888,GO:1990837	negative regulation of transcription by RNA polymerase II|RNA polymerase II regulatory region sequence-specific DNA binding|RNA polymerase II proximal promoter sequence-specific DNA binding|RNA polymerase II distal enhancer sequence-specific DNA binding|DNA-binding transcription factor activity, RNA polymerase II-specific|proximal promoter DNA-binding transcription repressor activity, RNA polymer…	oas04710	Circadian rhythm
BMF	353.224	524.456	181.993	0.347039	-1.52683	2.55135e-14	2.41128e-12	Down	1.11882	0.784138	1.0227	3.53898	3.32817	1.82715	GeneID:101108051	Bcl2 modifying factor	GO:0001669,GO:0001844,GO:0005741,GO:0005829,GO:0005886,GO:0010507,GO:0016459,GO:0032464,GO:0034644,GO:0043065,GO:0043276,GO:0090200,GO:2001244	acrosomal vesicle|protein insertion into mitochondrial membrane involved in apoptotic signaling pathway|mitochondrial outer membrane|cytosol|plasma membrane|negative regulation of autophagy|myosin complex|positive regulation of protein homooligomerization|cellular response to UV|positive regulation of apoptotic process|anoikis|positive regulation of release of cytochrome c from mitochondria|posit…	oas05206	MicroRNAs in cancer
BTC	8.75315	3.91038	13.5959	3.47406	1.79662	0.0195423	0.0875355	Up	0.14294	0.12584	0.0670463	0.0165973	0.0337333	0.0492411	GeneID:101103979	betacellulin	GO:0005154,GO:0005615,GO:0005886,GO:0007173,GO:0008083,GO:0008284,GO:0016021,GO:0051781	epidermal growth factor receptor binding|extracellular space|plasma membrane|epidermal growth factor receptor signaling pathway|growth factor activity|positive regulation of cell proliferation|integral component of membrane|positive regulation of cell division	oas04012	ErbB signaling pathway
C18H14orf132	62.1974	85.7465	38.6482	0.450714	-1.14971	4.87231e-05	0.000729619	Down	0.391336	0.254645	0.322223	0.654925	0.81914	0.739018	GeneID:105603239	chromosome 18 C14orf132 homolog	GO:0016021	integral component of membrane
C1QL3	13.2399	6.51305	19.9668	3.06524	1.616	0.0120732	0.0616228	Up	0.164528	0.11491	0.204989	0.0568345	0.0165019	0.0883231	GeneID:101118208	complement C1q like 3	GO:0005576,GO:0005581,GO:0042802,GO:0050807	extracellular region|collagen trimer|identical protein binding|regulation of synapse organization
C1QTNF6	21.5654	31.9368	11.1939	0.350367	-1.51306	0.00172623	0.0138632	Down	0.092331	0.143303	0.102255	0.273384	0.28811	0.430572	GeneID:101102801	C1q and TNF related 6	GO:0005581,GO:0005615,GO:0042802,GO:0070208	collagen trimer|extracellular space|identical protein binding|protein heterotrimerization
C1QTNF9	9.86039	15.9805	3.74028	0.2337	-2.09727	0.00601302	0.0366874	Down	0.12056	0.0601443	0.0400555	0.178484	0.483679	0.313793	GeneID:101116326	C1q and TNF related 9	GO:0005179,GO:0005581,GO:0005615,GO:0019395,GO:0045792,GO:0071902,GO:0097009,GO:1900078	hormone activity|collagen trimer|extracellular space|fatty acid oxidation|negative regulation of cell size|positive regulation of protein serine/threonine kinase activity|energy homeostasis|positive regulation of cellular response to insulin stimulus
C1R	10739.1	14479.1	6998.99	0.483375	-1.04878	2.83187e-31	9.85698e-29	Down	96.166	83.0253	76.1086	170.313	176.408	197.308	GeneID:101107430	complement C1r	GO:0004252,GO:0005509,GO:0006958,GO:0045087	serine-type endopeptidase activity|calcium ion binding|complement activation, classical pathway|innate immune response	oas04145,oas04610,oas05133,oas05150,oas05322	Phagosome|Complement and coagulation cascades|Pertussis|Staphylococcus aureus infection|Systemic lupus erythematosus
C7H15orf48	149.434	51.8531	247.014	4.76459	2.25235	2.45875e-21	4.80669e-19	Up	8.06059	11.0227	10.6852	1.37304	3.03688	2.03678	GeneID:101114276	chromosome 7 C15orf48 homolog	GO:0005634,GO:0005751,GO:0022900,GO:1902600	nucleus|mitochondrial respiratory chain complex IV|electron transport chain|proton transmembrane transport
CA12	5736.68	3708.54	7764.83	2.09378	1.06611	7.33557e-06	0.000143209	Up	49.6234	56.8635	59.7102	31.9293	31.4051	18.5115	GeneID:101111288	carbonic anhydrase 12	GO:0004089,GO:0005886,GO:0008270,GO:0015701,GO:0016021,GO:0055064	carbonate dehydratase activity|plasma membrane|zinc ion binding|bicarbonate transport|integral component of membrane|chloride ion homeostasis	oas00910	Nitrogen metabolism
CA2	4.92041	8.48259	1.35823	0.159976	-2.64407	0.0170167	0.0791013	Down	0.0164817	0.0328892	0.0164279	0.0976017	0.231432	0.0965217	GeneID:101113341	carbonic anhydrase 2	GO:0004089,GO:0005737,GO:0005886,GO:0008270,GO:0038166,GO:0044070,GO:0051453,GO:2001150	carbonate dehydratase activity|cytoplasm|plasma membrane|zinc ion binding|angiotensin-activated signaling pathway|regulation of anion transport|regulation of intracellular pH|positive regulation of dipeptide transmembrane transport	oas00910,oas04964,oas04966,oas04971,oas04972,oas04976	Nitrogen metabolism|Proximal tubule bicarbonate reclamation|Collecting duct acid secretion|Gastric acid secretion|Pancreatic secretion|Bile secretion
CADM3	130.607	192.665	68.55	0.35564	-1.49151	1.386e-12	1.08085e-10	Down	1.33672	0.96853	0.904101	2.81138	3.20813	3.2773	GeneID:101121565	cell adhesion molecule 3	GO:0005911,GO:0007156,GO:0007157,GO:0008104,GO:0042803,GO:0098688,GO:0099056	cell-cell junction|homophilic cell adhesion via plasma membrane adhesion molecules|heterophilic cell-cell adhesion via plasma membrane cell adhesion molecules|protein localization|protein homodimerization activity|parallel fiber to Purkinje cell synapse|integral component of presynaptic membrane	oas04514	Cell adhesion molecules (CAMs)
CALR3	47.0087	30.6529	63.3644	2.06756	1.04793	0.00111345	0.00970092	Up	0.933569	1.21808	1.19894	0.460703	0.702267	0.508175	GeneID:101115872	calreticulin 3	GO:0005509,GO:0005788,GO:0006457,GO:0007283,GO:0030154,GO:0030246,GO:0051082	calcium ion binding|endoplasmic reticulum lumen|protein folding|spermatogenesis|cell differentiation|carbohydrate binding|unfolded protein binding
CASQ2	29.77	19.2271	40.313	2.09667	1.0681	0.0177246	0.0811771	Up	0.215219	0.590522	0.471938	0.148691	0.194276	0.283588	GeneID:101105292	calsequestrin 2	GO:0005509,GO:0010880,GO:0014809,GO:0016529,GO:0030018,GO:0033018,GO:0060315	calcium ion binding|regulation of release of sequestered calcium ion into cytosol by sarcoplasmic reticulum|regulation of skeletal muscle contraction by regulation of release of sequestered calcium ion|sarcoplasmic reticulum|Z disc|sarcoplasmic reticulum lumen|negative regulation of ryanodine-sensitive calcium-release channel activity
CAVIN4	44.8631	28.0411	61.685	2.20004	1.13753	0.000352307	0.0038468	Up	0.457735	0.513793	0.513272	0.217818	0.262344	0.215408	GeneID:101122919	caveolae associated protein 4	GO:0005737,GO:0005829,GO:0005886,GO:0005901,GO:0007517,GO:0030018,GO:0030154,GO:0035023,GO:0042383,GO:0045944	cytoplasm|cytosol|plasma membrane|caveola|muscle organ development|Z disc|cell differentiation|regulation of Rho protein signal transduction|sarcolemma|positive regulation of transcription by RNA polymerase II
CBX2	27.5211	40.4158	14.6264	0.361372	-1.46845	0.00109842	0.00959335	Down	0.133157	0.084546	0.0422301	0.227003	0.224615	0.289475	GeneID:101111469	chromobox 2	GO:0000122,GO:0000791,GO:0000792,GO:0003677,GO:0003682,GO:0005634,GO:0005654,GO:0006325,GO:0030154,GO:0031519,GO:0035064,GO:0035102,GO:0045137	negative regulation of transcription by RNA polymerase II|euchromatin|heterochromatin|DNA binding|chromatin binding|nucleus|nucleoplasm|chromatin organization|cell differentiation|PcG protein complex|methylated histone binding|PRC1 complex|development of primary sexual characteristics
CCDC181	7.89209	3.9145	11.8697	3.03278	1.60064	0.0418461	0.151701	Up	0.103925	0.207383	0.142431	0.0384642	0.0781765	0.0380385	GeneID:101123136	coiled-coil domain containing 181	GO:0002177,GO:0005737,GO:0005874,GO:0008017,GO:0036126	manchette|cytoplasm|microtubule|microtubule binding|sperm flagellum
CCDC3	41.3764	69.1569	13.5958	0.196357	-2.34845	1.39291e-08	5.30911e-07	Down	0.164432	0.185937	0.0874108	0.757351	1.0665	0.481481	GeneID:101109471	coiled-coil domain containing 3	GO:0005576,GO:0005783,GO:0010804,GO:0045600,GO:0046889	extracellular region|endoplasmic reticulum|negative regulation of tumor necrosis factor-mediated signaling pathway|positive regulation of fat cell differentiation|positive regulation of lipid biosynthetic process
CCDC33	74.6243	119.065	30.1831	0.253477	-1.98008	3.06691e-10	1.58007e-08	Down	0.305986	0.384449	0.316283	1.46526	1.81866	0.818543	GeneID:101120277	coiled-coil domain containing 33
CCDC68	7.0872	2.60554	11.5689	4.43504	2.14895	0.022307	0.0966435	Up	0.4608	0.146288	0.104386	0.0206726	0.042016	0.102219	GeneID:101120290	coiled-coil domain containing 68	GO:0005622,GO:0005814,GO:0008104,GO:0034454,GO:0035556,GO:0120103	intracellular|centriole|protein localization|microtubule anchoring at centrosome|intracellular signal transduction|centriolar subdistal appendage
CCL24	11.2264	5.86503	16.5878	2.82844	1.50001	0.0249066	0.10445	Up	0.236959	0.106392	0.236186	0.0701615	0.0475332	0.0925135	GeneID:101117556	C-C motif chemokine ligand 24	GO:0001938,GO:0002548,GO:0005615,GO:0006954,GO:0007010,GO:0007186,GO:0008009,GO:0008360,GO:0030593,GO:0030838,GO:0031728,GO:0043547,GO:0045766,GO:0048020,GO:0048245,GO:0048247,GO:0050729,GO:0070098,GO:0070374,GO:0071346,GO:0071347,GO:0071356,GO:2000418	positive regulation of endothelial cell proliferation|monocyte chemotaxis|extracellular space|inflammatory response|cytoskeleton organization|G protein-coupled receptor signaling pathway|chemokine activity|regulation of cell shape|neutrophil chemotaxis|positive regulation of actin filament polymerization|CCR3 chemokine receptor binding|positive regulation of GTPase activity|positive regulation of…	oas04060,oas04062	Cytokine-cytokine receptor interaction|Chemokine signaling pathway
CCNB1IP1	8.8907	4.56647	13.2149	2.89489	1.53351	0.0349961	0.13358	Up	0.162096	0.175209	0.188495	0.0399961	0.0948384	0.052738	GeneID:101115966	cyclin B1 interacting protein 1	GO:0000795,GO:0001825,GO:0007131,GO:0007286,GO:0016567,GO:0016740,GO:0046872,GO:0051026	synaptonemal complex|blastocyst formation|reciprocal meiotic recombination|spermatid development|protein ubiquitination|transferase activity|metal ion binding|chiasma assembly
CCND1	4435.77	2557.51	6314.02	2.46879	1.3038	2.82155e-37	1.5487e-34	Up	40.5611	41.2304	42.5348	15.2449	15.68	20.8782	GeneID:100144763	cyclin D1	GO:0000079,GO:0000082,GO:0000122,GO:0000278,GO:0000307,GO:0000320,GO:0001934,GO:0003714,GO:0004672,GO:0005634,GO:0005654,GO:0005737,GO:0005923,GO:0006974,GO:0007088,GO:0007595,GO:0008134,GO:0008284,GO:0010971,GO:0016020,GO:0016055,GO:0016538,GO:0017053,GO:0019901,GO:0030857,GO:0030968,GO:0031571,GO:0033598,GO:0033601,GO:0042493,GO:0042826,GO:0044321,GO:0045444,GO:0045737,GO:0045787,GO:0051301,GO:…	regulation of cyclin-dependent protein serine/threonine kinase activity|G1/S transition of mitotic cell cycle|negative regulation of transcription by RNA polymerase II|mitotic cell cycle|cyclin-dependent protein kinase holoenzyme complex|re-entry into mitotic cell cycle|positive regulation of protein phosphorylation|transcription corepressor activity|protein kinase activity|nucleus|nucleoplasm|cy…	oas01522,oas04068,oas04110,oas04115,oas04151,oas04152,oas04218,oas04310,oas04340,oas04371,oas04390,oas04510,oas04530,oas04630,oas04917,oas04919,oas04921,oas04933,oas04934,oas05160,oas05162,oas05163,oas05165,oas05166,oas05167,oas05169,oas05200,oas05203,oas05205,oas05206,oas05210,oas05212,oas05213,oas05214,oas05215,oas05216,oas05218,oas05219,oas05220,oas05221,oas05222,oas05223,oas05224,oas05225,oas…	Endocrine resistance|FoxO signaling pathway|Cell cycle|p53 signaling pathway|PI3K-Akt signaling pathway|AMPK signaling pathway|Cellular senescence|Wnt signaling pathway|Hedgehog signaling pathway|Apelin signaling pathway|Hippo signaling pathway|Focal adhesion|Tight junction|Jak-STAT signaling pathway|Prolactin signaling pathway|Thyroid hormone signaling pathway|Oxytocin signaling pathway|AGE-RAGE…
CD244	9.29746	0.977147	17.6178	18.0184	4.1714	5.4331e-05	0.000800163	Up	0.128163	0.120353	0.142774	0	0.00756153	0.0147169	GeneID:101121900	CD244 molecule	GO:0002250,GO:0002323,GO:0005886,GO:0007165,GO:0009897,GO:0016021,GO:0038023,GO:0042288,GO:0045087,GO:0050900,GO:0060732,GO:0071663,GO:1902715,GO:2000484	adaptive immune response|natural killer cell activation involved in immune response|plasma membrane|signal transduction|external side of plasma membrane|integral component of membrane|signaling receptor activity|MHC class I protein binding|innate immune response|leukocyte migration|positive regulation of inositol phosphate biosynthetic process|positive regulation of granzyme B production|positive…	oas04650	Natural killer cell mediated cytotoxicity
CD53	3.37063	0.651969	6.08929	9.34267	3.22383	0.0303763	0.120517	Up	0.163035	0.0180742	0.144447	0	0.0181691	0.0176812	GeneID:101112271	CD53 molecule	GO:0005886,GO:0005887,GO:0005911,GO:0007166,GO:1901741	plasma membrane|integral component of plasma membrane|cell-cell junction|cell surface receptor signaling pathway|positive regulation of myoblast fusion
CDH5	16.8051	25.4341	8.17603	0.320779	-1.64035	0.00459792	0.0294908	Down	0.0567138	0.0565863	0.010278	0.142482	0.144794	0.110711	GeneID:101107462	cadherin 5	GO:0001955,GO:0005509,GO:0005886,GO:0005913,GO:0005923,GO:0007043,GO:0007156,GO:0008092,GO:0009986,GO:0016021,GO:0016339,GO:0016342,GO:0030054,GO:0034332,GO:0042803,GO:0044331,GO:0045296,GO:0098609,GO:2000114	blood vessel maturation|calcium ion binding|plasma membrane|cell-cell adherens junction|bicellular tight junction|cell-cell junction assembly|homophilic cell adhesion via plasma membrane adhesion molecules|cytoskeletal protein binding|cell surface|integral component of membrane|calcium-dependent cell-cell adhesion via plasma membrane cell adhesion molecules|catenin complex|cell junction|adherens …	oas04514,oas04670,oas05418	Cell adhesion molecules (CAMs)|Leukocyte transendothelial migration|Fluid shear stress and atherosclerosis
CDKN1C	231.489	365.997	96.9819	0.264945	-1.91624	5.84926e-21	1.08409e-18	Down	2.23302	1.31488	1.67842	5.61821	6.18668	8.48592	GeneID:100216434	cyclin dependent kinase inhibitor 1C	GO:0000122,GO:0001501,GO:0001822,GO:0001890,GO:0004861,GO:0005634,GO:0005737,GO:0007050,GO:0007096,GO:0007568,GO:0030099,GO:0030325,GO:0030511,GO:0035264,GO:0042326,GO:0042551,GO:0043010,GO:0044877,GO:0045893,GO:0050680,GO:0055123,GO:0060065,GO:0060669,GO:0071514,GO:1902746	negative regulation of transcription by RNA polymerase II|skeletal system development|kidney development|placenta development|cyclin-dependent protein serine/threonine kinase inhibitor activity|nucleus|cytoplasm|cell cycle arrest|regulation of exit from mitosis|aging|myeloid cell differentiation|adrenal gland development|positive regulation of transforming growth factor beta receptor signaling pa…	oas04110	Cell cycle
CELA1	5.55442	1.95537	9.15346	4.68011	2.22654	0.0215482	0.0943294	Up	0.133416	0.106492	0.119682	0.0395032	0.0133814	0.0260441	GeneID:101114258	chymotrypsin like elastase family member 1	GO:0000122,GO:0004252,GO:0005615,GO:0006508,GO:0006954,GO:0009791,GO:0016055,GO:0031017,GO:0035264,GO:0042127,GO:0045595,GO:0045766,GO:0045944,GO:0046872,GO:0048771,GO:0060309,GO:0061113	negative regulation of transcription by RNA polymerase II|serine-type endopeptidase activity|extracellular space|proteolysis|inflammatory response|post-embryonic development|Wnt signaling pathway|exocrine pancreas development|multicellular organism growth|regulation of cell proliferation|regulation of cell differentiation|positive regulation of angiogenesis|positive regulation of transcription by…
CELSR2	19.1359	28.0612	10.2106	0.363495	-1.45999	0.0287909	0.115739	Down	0.0540684	0.016184	0.0107784	0.117401	0.0949021	0.0184707	GeneID:101103606	cadherin EGF LAG seven-pass G-type receptor 2	GO:0004930,GO:0005509,GO:0005737,GO:0005886,GO:0006355,GO:0007156,GO:0007186,GO:0016021,GO:0016055,GO:0021999,GO:0022407,GO:0048813,GO:0060071	G protein-coupled receptor activity|calcium ion binding|cytoplasm|plasma membrane|regulation of transcription, DNA-templated|homophilic cell adhesion via plasma membrane adhesion molecules|G protein-coupled receptor signaling pathway|integral component of membrane|Wnt signaling pathway|neural plate anterior/posterior regionalization|regulation of cell-cell adhesion|dendrite morphogenesis|Wnt sign…
CEP68	99.8247	135.596	64.0537	0.47241	-1.08189	1.09609e-06	2.73947e-05	Down	0.238949	0.267186	0.271021	0.544863	0.516514	0.63132	GeneID:101117660	centrosomal protein 68	GO:0005737,GO:0005813,GO:0007098	cytoplasm|centrosome|centrosome cycle
CERS3	104.705	66.1948	143.216	2.16322	1.11318	2.31033e-06	5.30076e-05	Up	1.32865	0.964115	0.887891	0.521554	0.567875	0.427363	GeneID:101110093	ceramide synthase 3	GO:0000981,GO:0003677,GO:0005783,GO:0005789,GO:0016021,GO:0030148,GO:0030216,GO:0031965,GO:0046513,GO:0050291	DNA-binding transcription factor activity, RNA polymerase II-specific|DNA binding|endoplasmic reticulum|endoplasmic reticulum membrane|integral component of membrane|sphingolipid biosynthetic process|keratinocyte differentiation|nuclear membrane|ceramide biosynthetic process|sphingosine N-acyltransferase activity	oas00600,oas04071	Sphingolipid metabolism|Sphingolipid signaling pathway
CHL1	21.3286	10.7543	31.9029	2.96516	1.56811	0.00106569	0.00935905	Up	0.143916	0.113362	0.0981475	0.0373792	0.0341871	0.0517518	GeneID:101113017	cell adhesion molecule L1 like	GO:0001764,GO:0002020,GO:0005886,GO:0007155,GO:0007165,GO:0007411,GO:0008344,GO:0016021,GO:0030425,GO:0035640,GO:0043524,GO:0045177,GO:0050890,GO:0070062	neuron migration|protease binding|plasma membrane|cell adhesion|signal transduction|axon guidance|adult locomotory behavior|integral component of membrane|dendrite|exploration behavior|negative regulation of neuron apoptotic process|apical part of cell|cognition|extracellular exosome
CHODL	24.1019	14.9895	33.2142	2.21551	1.14764	0.0107842	0.0568741	Up	0.323422	0.503404	0.43842	0.217062	0.129755	0.239914	GeneID:101115923	chondrolectin
CLIC2	7.90782	11.7408	4.07482	0.346808	-1.52779	0.0488852	0.169006	Down	0.101627	0.0811188	0.0607773	0.300909	0.265019	0.158709	GeneID:101106057	chloride intracellular channel 2	GO:0004602,GO:0005244,GO:0005254,GO:0005622,GO:0005634,GO:0005737,GO:0007165,GO:0010880,GO:0010881,GO:0034707,GO:0051099,GO:0060315	glutathione peroxidase activity|voltage-gated ion channel activity|chloride channel activity|intracellular|nucleus|cytoplasm|signal transduction|regulation of release of sequestered calcium ion into cytosol by sarcoplasmic reticulum|regulation of cardiac muscle contraction by regulation of the release of sequestered calcium ion|chloride channel complex|positive regulation of binding|negative regu…
CNGA3	348.503	467.33	229.677	0.4914	-1.02503	2.78628e-10	1.4727e-08	Down	1.85489	1.60396	1.45732	3.71889	4.00539	2.59855	GeneID:100233164	cyclic nucleotide gated channel alpha 3	GO:0005222,GO:0005223,GO:0007601,GO:0016021,GO:0030553,GO:0050896	intracellular cAMP-activated cation channel activity|intracellular cGMP-activated cation channel activity|visual perception|integral component of membrane|cGMP binding|response to stimulus
COCH	18.3988	29.3569	7.44076	0.253776	-1.97837	0.00033329	0.00368142	Down	0.0649488	0.0462877	0.0924814	0.302199	0.353632	0.172068	GeneID:101102269	cochlin
COL18A1	100.477	164.001	36.9545	0.22532	-2.14995	2.11126e-18	3.13853e-16	Down	0.172499	0.233182	0.199668	1.07094	0.904137	0.792957	GeneID:101106232	collagen type XVIII alpha 1 chain	GO:0001525,GO:0001886,GO:0005201,GO:0005576,GO:0005581,GO:0005604,GO:0005615,GO:0005788,GO:0007155,GO:0007601,GO:0008284,GO:0008285,GO:0009887,GO:0030020,GO:0030198,GO:0030335,GO:0031012,GO:0042493,GO:0042802,GO:0046872,GO:0051599,GO:0062023,GO:0070062,GO:2000353	angiogenesis|endothelial cell morphogenesis|extracellular matrix structural constituent|extracellular region|collagen trimer|basement membrane|extracellular space|endoplasmic reticulum lumen|cell adhesion|visual perception|positive regulation of cell proliferation|negative regulation of cell proliferation|animal organ morphogenesis|extracellular matrix structural constituent conferring tensile st…	oas04974	Protein digestion and absorption
COL4A5	346.086	483.396	208.776	0.431907	-1.21121	9.5673e-17	1.18726e-14	Down	0.875439	0.839383	0.910891	1.74914	2.08591	2.4217	GeneID:101112706	collagen type IV alpha 5 chain			oas04151,oas04510,oas04512,oas04926,oas04933,oas04974,oas05146,oas05165,oas05200,oas05222	PI3K-Akt signaling pathway|Focal adhesion|ECM-receptor interaction|Relaxin signaling pathway|AGE-RAGE signaling pathway in diabetic complications|Protein digestion and absorption|Amoebiasis|Human papillomavirus infection|Pathways in cancer|Small cell lung cancer
COL4A6	44.9934	72.6505	17.3364	0.238337	-2.06893	4.94327e-07	1.34372e-05	Down	0.105115	0.0605071	0.0402971	0.267345	0.190583	0.430122	GeneID:101113128	collagen type IV alpha 6 chain	GO:0005201,GO:0005576,GO:0005587,GO:0005615,GO:0005788,GO:0007155,GO:0030020,GO:0030198,GO:0031012,GO:0038063,GO:0062023	extracellular matrix structural constituent|extracellular region|collagen type IV trimer|extracellular space|endoplasmic reticulum lumen|cell adhesion|extracellular matrix structural constituent conferring tensile strength|extracellular matrix organization|extracellular matrix|collagen-activated tyrosine kinase receptor signaling pathway|collagen-containing extracellular matrix	oas04151,oas04510,oas04512,oas04926,oas04933,oas04974,oas05146,oas05165,oas05200,oas05222	PI3K-Akt signaling pathway|Focal adhesion|ECM-receptor interaction|Relaxin signaling pathway|AGE-RAGE signaling pathway in diabetic complications|Protein digestion and absorption|Amoebiasis|Human papillomavirus infection|Pathways in cancer|Small cell lung cancer
COLEC12	2969.81	4006.78	1932.83	0.482417	-1.05165	1.01032e-48	1.44183e-45	Down	13.8999	12.8691	14.8603	29.6747	30.2808	28.8967	GeneID:101102949	collectin subfamily member 12	GO:0004888,GO:0005581,GO:0006910,GO:0006955,GO:0008329,GO:0016021,GO:0030169,GO:0030246,GO:0034138,GO:0046872,GO:0060355,GO:0071360	transmembrane signaling receptor activity|collagen trimer|phagocytosis, recognition|immune response|signaling pattern recognition receptor activity|integral component of membrane|low-density lipoprotein particle binding|carbohydrate binding|toll-like receptor 3 signaling pathway|metal ion binding|positive regulation of cell adhesion molecule production|cellular response to exogenous dsRNA	oas04145	Phagosome
CRABP1	1732.63	2482.35	982.91	0.395931	-1.33668	8.34023e-38	4.95931e-35	Down	43.3642	32.3648	34.0337	94.5478	90.9067	100.019	GeneID:101122057	cellular retinoic acid binding protein 1	GO:0001972,GO:0005829,GO:0016918,GO:0019841,GO:0034653	retinoic acid binding|cytosol|retinal binding|retinol binding|retinoic acid catabolic process
CREG2	98.5008	56.7161	140.286	2.47351	1.30656	8.31442e-09	3.33301e-07	Up	2.76245	3.06249	3.2342	1.08193	1.23142	1.45514	GeneID:101110318	cellular repressor of E1A stimulated genes 2	GO:0005576,GO:0005783,GO:0005794,GO:0048037	extracellular region|endoplasmic reticulum|Golgi apparatus|cofactor binding
CRLF1	34.1378	16.3069	51.9687	3.18622	1.67184	5.12161e-05	0.000758988	Up	1.11822	0.956317	0.636897	0.40292	0.302642	0.173244	GeneID:101108913	cytokine receptor like factor 1	GO:0001657,GO:0004896,GO:0005576,GO:0005615,GO:0005829,GO:0008284,GO:0009897,GO:0010469,GO:0019221,GO:0019955,GO:0042531,GO:0043235,GO:0043524,GO:0046982,GO:0070106,GO:0097058,GO:2000672	ureteric bud development|cytokine receptor activity|extracellular region|extracellular space|cytosol|positive regulation of cell proliferation|external side of plasma membrane|regulation of signaling receptor activity|cytokine-mediated signaling pathway|cytokine binding|positive regulation of tyrosine phosphorylation of STAT protein|receptor complex|negative regulation of neuron apoptotic process…
CSF1R	8.68435	14.9999	2.36876	0.158089	-2.66119	0.00200606	0.0156029	Down	0.0220617	0.00733735	0.0219897	0.181452	0.0885101	0.0645999	GeneID:101109969	colony stimulating factor 1 receptor	GO:0004714,GO:0004888,GO:0005011,GO:0005524,GO:0005737,GO:0005887,GO:0006954,GO:0007169,GO:0008284,GO:0008360,GO:0009968,GO:0009986,GO:0018108,GO:0019955,GO:0030154,GO:0030316,GO:0030335,GO:0031529,GO:0036006,GO:0042531,GO:0043066,GO:0043235,GO:0045087,GO:0045124,GO:0046488,GO:0046777,GO:0048015,GO:0070374,GO:0071345,GO:0071902,GO:1990682,GO:2000249	transmembrane receptor protein tyrosine kinase activity|transmembrane signaling receptor activity|macrophage colony-stimulating factor receptor activity|ATP binding|cytoplasm|integral component of plasma membrane|inflammatory response|transmembrane receptor protein tyrosine kinase signaling pathway|positive regulation of cell proliferation|regulation of cell shape|negative regulation of signal tr…	oas04010,oas04014,oas04015,oas04060,oas04151,oas04380,oas04640,oas05200,oas05202,oas05221	MAPK signaling pathway|Ras signaling pathway|Rap1 signaling pathway|Cytokine-cytokine receptor interaction|PI3K-Akt signaling pathway|Osteoclast differentiation|Hematopoietic cell lineage|Pathways in cancer|Transcriptional misregulation in cancer|Acute myeloid leukemia
CSF2RB	3606.4	5113.72	2099.08	0.410481	-1.28461	2.82676e-10	1.48858e-08	Down	9.83289	10.3096	10.1526	28.9063	29.1983	18.0179	GeneID:101123199	colony stimulating factor 2 receptor beta common subunit	GO:0000165,GO:0004713,GO:0004896,GO:0005088,GO:0005622,GO:0005886,GO:0005887,GO:0007165,GO:0007585,GO:0019221,GO:0030526,GO:0032496,GO:0036016,GO:0038023,GO:0038043,GO:0038156,GO:0044267	MAPK cascade|protein tyrosine kinase activity|cytokine receptor activity|Ras guanyl-nucleotide exchange factor activity|intracellular|plasma membrane|integral component of plasma membrane|signal transduction|respiratory gaseous exchange|cytokine-mediated signaling pathway|granulocyte macrophage colony-stimulating factor receptor complex|response to lipopolysaccharide|cellular response to interleu…	oas04060,oas04210,oas04630,oas05200	Cytokine-cytokine receptor interaction|Apoptosis|Jak-STAT signaling pathway|Pathways in cancer
CX3CL1	8.90663	4.23753	13.5757	3.20257	1.67923	0.0243835	0.102921	Up	0.0803158	0.152257	0.0880592	0.0475617	0.0241667	0.0313569	GeneID:101119927	C-X3-C motif chemokine ligand 1			oas04060,oas04062,oas04668,oas05163	Cytokine-cytokine receptor interaction|Chemokine signaling pathway|TNF signaling pathway|Human cytomegalovirus infection
CXCL1	865.582	414.316	1316.85	3.17829	1.66825	1.33586e-65	4.76602e-62	Up	106.939	105.702	110.326	37.1549	31.5761	35.8495	GeneID:443380	chemokine (C-X-C motif) ligand 1 (melanoma growth stimulating activity, alpha)	GO:0005615,GO:0006954,GO:0006955,GO:0008009,GO:0008083	extracellular space|inflammatory response|immune response|chemokine activity|growth factor activity	oas04060,oas04062,oas04621,oas04657,oas04668,oas05132,oas05134,oas05167	Cytokine-cytokine receptor interaction|Chemokine signaling pathway|NOD-like receptor signaling pathway|IL-17 signaling pathway|TNF signaling pathway|Salmonella infection|Legionellosis|Kaposi sarcoma-associated herpesvirus infection
CXCL8	4588.18	1189.05	7987.31	6.71758	2.74794	1.03419e-136	1.47589e-132	Up	152.527	145.727	145.428	23.892	27.0047	17.2373	GeneID:443418	C-X-C motif chemokine ligand 8	GO:0005153,GO:0005615,GO:0006954,GO:0006955,GO:0007050,GO:0008009,GO:0030155,GO:0030593,GO:0042119,GO:0045091,GO:0050930	interleukin-8 receptor binding|extracellular space|inflammatory response|immune response|cell cycle arrest|chemokine activity|regulation of cell adhesion|neutrophil chemotaxis|neutrophil activation|regulation of single stranded viral RNA replication via double stranded DNA intermediate|induction of positive chemotaxis	oas04060,oas04062,oas04064,oas04072,oas04218,oas04620,oas04621,oas04622,oas04657,oas04932,oas04933,oas05132,oas05133,oas05134,oas05142,oas05144,oas05146,oas05161,oas05163,oas05164,oas05167,oas05200,oas05202,oas05219,oas05323	Cytokine-cytokine receptor interaction|Chemokine signaling pathway|NF-kappa B signaling pathway|Phospholipase D signaling pathway|Cellular senescence|Toll-like receptor signaling pathway|NOD-like receptor signaling pathway|RIG-I-like receptor signaling pathway|IL-17 signaling pathway|Non-alcoholic fatty liver disease (NAFLD)|AGE-RAGE signaling pathway in diabetic complications|Salmonella infectio…
CXCR4	36.9594	49.5692	24.3497	0.491696	-1.02416	0.0057803	0.0355982	Down	0.393585	0.3366	0.616473	0.869405	1.16548	0.786611	GeneID:443532	C-X-C motif chemokine receptor 4	GO:0001666,GO:0003779,GO:0005764,GO:0005769,GO:0005770,GO:0005886,GO:0006935,GO:0006955,GO:0007204,GO:0007420,GO:0009897,GO:0016021,GO:0016493,GO:0019722,GO:0019956,GO:0019957,GO:0022008,GO:0030054,GO:0031252,GO:0031625,GO:0032027,GO:0032991,GO:0038147,GO:0038160,GO:0043130,GO:0050920,GO:0060326,GO:0071345	response to hypoxia|actin binding|lysosome|early endosome|late endosome|plasma membrane|chemotaxis|immune response|positive regulation of cytosolic calcium ion concentration|brain development|external side of plasma membrane|integral component of membrane|C-C chemokine receptor activity|calcium-mediated signaling|chemokine binding|C-C chemokine binding|neurogenesis|cell junction|cell leading edge…	oas04020,oas04060,oas04062,oas04144,oas04360,oas04670,oas04672,oas04810,oas05163,oas05170,oas05200	Calcium signaling pathway|Cytokine-cytokine receptor interaction|Chemokine signaling pathway|Endocytosis|Axon guidance|Leukocyte transendothelial migration|Intestinal immune network for IgA production|Regulation of actin cytoskeleton|Human cytomegalovirus infection|Human immunodeficiency virus 1 infection|Pathways in cancer
CYP1A1	300.564	157.13	443.998	2.82611	1.49882	1.28477e-15	1.37856e-13	Up	3.28696	4.90311	6.01184	1.50965	1.80615	1.85294	GeneID:100170113	cytochrome P4501A1	GO:0005506,GO:0005789,GO:0020037,GO:0031090,GO:0070330	iron ion binding|endoplasmic reticulum membrane|heme binding|organelle membrane|aromatase activity	oas00140,oas00380,oas00830,oas00980,oas04913,oas05204	Steroid hormone biosynthesis|Tryptophan metabolism|Retinol metabolism|Metabolism of xenobiotics by cytochrome P450|Ovarian steroidogenesis|Chemical carcinogenesis
DAAM2	98.5819	135.012	62.1518	0.460086	-1.12003	8.47867e-06	0.000161332	Down	0.265221	0.310106	0.181744	0.572612	0.677501	0.448976	GeneID:101103274	dishevelled associated activator of morphogenesis 2	GO:0003779,GO:0007368,GO:0016055,GO:0017048,GO:0021516,GO:0030036,GO:0048715,GO:0060828,GO:0070062,GO:0090263,GO:2000050	actin binding|determination of left/right symmetry|Wnt signaling pathway|Rho GTPase binding|dorsal spinal cord development|actin cytoskeleton organization|negative regulation of oligodendrocyte differentiation|regulation of canonical Wnt signaling pathway|extracellular exosome|positive regulation of canonical Wnt signaling pathway|regulation of non-canonical Wnt signaling pathway	oas04310	Wnt signaling pathway
DCLK2	46.0835	77.9281	14.2388	0.182712	-2.45236	5.73881e-12	4.05439e-10	Down	0.187892	0.121304	0.15423	0.894497	0.942266	0.776721	GeneID:101103094	doublecortin like kinase 2	GO:0004674,GO:0005524,GO:0005737,GO:0005856,GO:0035556	protein serine/threonine kinase activity|ATP binding|cytoplasm|cytoskeleton|intracellular signal transduction
DDIT4	2384.79	3281.77	1487.82	0.453369	-1.14124	4.0586e-22	8.51768e-20	Down	21.3067	24.7858	24.6319	62.7051	56.7285	41.3408	GeneID:101114584	DNA damage inducible transcript 4	GO:0001666,GO:0001764,GO:0005737,GO:0005739,GO:0005829,GO:0007420,GO:0008283,GO:0010801,GO:0030182,GO:0032007,GO:0032984,GO:0033137,GO:0042771,GO:0045820,GO:0048011,GO:0051607,GO:0071549,GO:0071889,GO:0072593,GO:1901216,GO:1902532	response to hypoxia|neuron migration|cytoplasm|mitochondrion|cytosol|brain development|cell proliferation|negative regulation of peptidyl-threonine phosphorylation|neuron differentiation|negative regulation of TOR signaling|protein-containing complex disassembly|negative regulation of peptidyl-serine phosphorylation|intrinsic apoptotic signaling pathway in response to DNA damage by p53 class medi…	oas04140,oas04150,oas04151,oas05206	Autophagy - animal|mTOR signaling pathway|PI3K-Akt signaling pathway|MicroRNAs in cancer
DLG3	78.3752	108.581	48.1692	0.44352	-1.17293	4.74753e-06	9.97821e-05	Down	0.319258	0.234713	0.240058	0.558332	0.71907	0.568555	GeneID:101102123	discs large MAGUK scaffold protein 3	GO:0001736,GO:0005615,GO:0005829,GO:0005886,GO:0005923,GO:0007268,GO:0008022,GO:0008285,GO:0010923,GO:0015276,GO:0016323,GO:0019900,GO:0019902,GO:0019903,GO:0030054,GO:0030165,GO:0030426,GO:0031594,GO:0031625,GO:0032281,GO:0035255,GO:0043005,GO:0043025,GO:0043113,GO:0043198,GO:0045197,GO:0061098,GO:0097120,GO:0098609,GO:0098839,GO:0098919,GO:0098978,GO:0099072,GO:0099092	establishment of planar polarity|extracellular space|cytosol|plasma membrane|bicellular tight junction|chemical synaptic transmission|protein C-terminus binding|negative regulation of cell proliferation|negative regulation of phosphatase activity|ligand-gated ion channel activity|basolateral plasma membrane|kinase binding|phosphatase binding|protein phosphatase binding|cell junction|PDZ domain bi…	oas04390,oas04530,oas05165	Hippo signaling pathway|Tight junction|Human papillomavirus infection
DNAH10	24.5009	12.0671	36.9348	3.06162	1.61429	0.000335619	0.00369854	Up	0.0645565	0.0764885	0.0784216	0.01792	0.0343981	0.0216599	GeneID:101121295	dynein axonemal heavy chain 10	GO:0005524,GO:0005737,GO:0005874,GO:0005929,GO:0007018,GO:0008569,GO:0030286,GO:0045503,GO:0045505,GO:0051959	ATP binding|cytoplasm|microtubule|cilium|microtubule-based movement|ATP-dependent microtubule motor activity, minus-end-directed|dynein complex|dynein light chain binding|dynein intermediate chain binding|dynein light intermediate chain binding	oas05016	Huntington disease
DNAJB5	82.9659	53.4535	112.478	2.10432	1.07335	1.19044e-05	0.000218365	Up	0.91832	0.832959	1.01518	0.387261	0.427038	0.537796	GeneID:101119367	DnaJ heat shock protein family (Hsp40) member B5	GO:0000122,GO:0005634,GO:0005829,GO:0006986,GO:0051082,GO:0051085,GO:0051087	negative regulation of transcription by RNA polymerase II|nucleus|cytosol|response to unfolded protein|unfolded protein binding|chaperone cofactor-dependent protein refolding|chaperone binding
DNAJC22	26.2506	15.9665	36.5346	2.2888	1.19459	0.00742782	0.0429117	Up	0.430695	0.286484	0.572386	0.177118	0.143994	0.256899	GeneID:101101970	DnaJ heat shock protein family (Hsp40) member C22	GO:0016021	integral component of membrane
DNM3	45.3505	62.9194	27.7817	0.441647	-1.17903	0.000222505	0.00264174	Down	0.0657781	0.0562544	0.0702467	0.13448	0.157868	0.155921	GeneID:101107117	dynamin 3	GO:0001917,GO:0003924,GO:0005525,GO:0005737,GO:0005794,GO:0005874,GO:0005886,GO:0006897,GO:0007416,GO:0008017,GO:0014069,GO:0016020,GO:0016185,GO:0030424,GO:0031410,GO:0031623,GO:0031798,GO:0031802,GO:0042802,GO:0043083,GO:0043197,GO:0044327,GO:0045202,GO:0045211,GO:0046847,GO:0048471,GO:0050803,GO:0050998,GO:0051491,GO:0061002,GO:0061828,GO:0061829,GO:0070062,GO:0098793,GO:0098844,GO:0098884,GO:…	photoreceptor inner segment|GTPase activity|GTP binding|cytoplasm|Golgi apparatus|microtubule|plasma membrane|endocytosis|synapse assembly|microtubule binding|postsynaptic density|membrane|synaptic vesicle budding from presynaptic endocytic zone membrane|axon|cytoplasmic vesicle|receptor internalization|type 1 metabotropic glutamate receptor binding|type 5 metabotropic glutamate receptor binding|…	oas04072,oas04144,oas04721,oas04961,oas05100	Phospholipase D signaling pathway|Endocytosis|Synaptic vesicle cycle|Endocrine and other factor-regulated calcium reabsorption|Bacterial invasion of epithelial cells
DOCK2	48.8671	84.5256	13.2087	0.15629	-2.67771	0.00261702	0.0191821	Down	0.0771625	0.0317013	0.0678624	0.54654	0.550855	0.0708843	GeneID:101104011	dedicator of cytokinesis 2	GO:0001766,GO:0001768,GO:0001771,GO:0002277,GO:0005096,GO:0005576,GO:0005829,GO:0005856,GO:0006935,GO:0007264,GO:0016020,GO:0030036,GO:0030676,GO:0035580,GO:0042608,GO:0043312,GO:0044351,GO:0045059,GO:0045060,GO:0046633,GO:0050690,GO:0050766,GO:0070062	membrane raft polarization|establishment of T cell polarity|immunological synapse formation|myeloid dendritic cell activation involved in immune response|GTPase activator activity|extracellular region|cytosol|cytoskeleton|chemotaxis|small GTPase mediated signal transduction|membrane|actin cytoskeleton organization|Rac guanyl-nucleotide exchange factor activity|specific granule lumen|T cell recept…	oas04062,oas04666	Chemokine signaling pathway|Fc gamma R-mediated phagocytosis
DPYD	159.444	213.871	105.018	0.491155	-1.02575	1.11055e-08	4.30487e-07	Down	0.475375	0.441433	0.539503	0.924428	1.09993	1.02905	GeneID:101109311	dihydropyrimidine dehydrogenase	GO:0002058,GO:0003954,GO:0004159,GO:0005737,GO:0005829,GO:0006210,GO:0006212,GO:0006214,GO:0017113,GO:0019483,GO:0042803,GO:0046872,GO:0050661,GO:0051536,GO:0051539	uracil binding|NADH dehydrogenase activity|dihydrouracil dehydrogenase (NAD+) activity|cytoplasm|cytosol|thymine catabolic process|uracil catabolic process|thymidine catabolic process|dihydropyrimidine dehydrogenase (NADP+) activity|beta-alanine biosynthetic process|protein homodimerization activity|metal ion binding|NADP binding|iron-sulfur cluster binding|4 iron, 4 sulfur cluster binding	oas00240,oas00410,oas00770,oas00983	Pyrimidine metabolism|beta-Alanine metabolism|Pantothenate and CoA biosynthesis|Drug metabolism - other enzymes
DPYSL4	17.8083	24.469	11.1477	0.456211	-1.13223	0.0454968	0.160993	Down	0.0713278	0.118612	0.201436	0.211196	0.476938	0.197255	GeneID:101108975	dihydropyrimidinase like 4	GO:0005737,GO:0016810,GO:0031005,GO:0051219,GO:0070997,GO:0097485	cytoplasm|hydrolase activity, acting on carbon-nitrogen (but not peptide) bonds|filamin binding|phosphoprotein binding|neuron death|neuron projection guidance
DTX4	21.2195	32.262	10.1771	0.315324	-1.66509	0.00125291	0.0106748	Down	0.102842	0.0932826	0.0838691	0.166095	0.309447	0.438018	GeneID:101110361	deltex E3 ubiquitin ligase 4	GO:0004842,GO:0005829,GO:0007219,GO:0008270,GO:0032479	ubiquitin-protein transferase activity|cytosol|Notch signaling pathway|zinc ion binding|regulation of type I interferon production	oas04330	Notch signaling pathway
DYNC1I1	77.6788	51.4794	103.878	2.01703	1.01223	0.000571998	0.00565303	Up	1.30376	1.04066	0.842078	0.422061	0.418447	0.78388	GeneID:101118013	dynein cytoplasmic 1 intermediate chain 1	GO:0000776,GO:0000777,GO:0000922,GO:0003774,GO:0003777,GO:0005634,GO:0005737,GO:0005829,GO:0005868,GO:0005874,GO:0006888,GO:0007018,GO:0008017,GO:0019886,GO:0030286,GO:0030507,GO:0031982,GO:0036464,GO:0045503,GO:0045504,GO:0047496,GO:0048471,GO:0055037	kinetochore|condensed chromosome kinetochore|spindle pole|motor activity|microtubule motor activity|nucleus|cytoplasm|cytosol|cytoplasmic dynein complex|microtubule|ER to Golgi vesicle-mediated transport|microtubule-based movement|microtubule binding|antigen processing and presentation of exogenous peptide antigen via MHC class II|dynein complex|spectrin binding|vesicle|cytoplasmic ribonucleoprot…	oas04145,oas04962,oas05132	Phagosome|Vasopressin-regulated water reabsorption|Salmonella infection
EAF2	161.166	100.744	221.589	2.19979	1.13737	4.78216e-10	2.40304e-08	Up	3.13733	3.96388	4.02783	1.78383	1.79567	1.63095	GeneID:101111144	ELL associated factor 2	GO:0000977,GO:0001228,GO:0005654,GO:0006366,GO:0006368,GO:0006915,GO:0008023,GO:0016607,GO:0030308,GO:0032783,GO:0045944,GO:0060770	RNA polymerase II regulatory region sequence-specific DNA binding|DNA-binding transcription activator activity, RNA polymerase II-specific|nucleoplasm|transcription by RNA polymerase II|transcription elongation from RNA polymerase II promoter|apoptotic process|transcription elongation factor complex|nuclear speck|negative regulation of cell growth|ELL-EAF complex|positive regulation of transcript…
EDA2R	236.122	89.3172	382.928	4.2867	2.09987	2.16231e-34	9.9543e-32	Up	3.91788	4.15726	3.6055	0.726311	0.997988	1.08247	GeneID:101118670	ectodysplasin A2 receptor	GO:0005031,GO:0005622,GO:0005886,GO:0005887,GO:0007275,GO:0008544,GO:0010668,GO:0016021,GO:0033209,GO:0038023,GO:0043123,GO:0046330,GO:0051092,GO:0072332	tumor necrosis factor-activated receptor activity|intracellular|plasma membrane|integral component of plasma membrane|multicellular organism development|epidermis development|ectodermal cell differentiation|integral component of membrane|tumor necrosis factor-mediated signaling pathway|signaling receptor activity|positive regulation of I-kappaB kinase/NF-kappaB signaling|positive regulation of JN…	oas04060,oas04064	Cytokine-cytokine receptor interaction|NF-kappa B signaling pathway
EFHD1	47.7054	29.6564	65.7544	2.21697	1.14859	0.000537393	0.00538563	Up	1.16547	0.73051	0.997847	0.38343	0.389651	0.568781	GeneID:101113980	EF-hand domain family member D1	GO:0005509,GO:0005743,GO:0031175	calcium ion binding|mitochondrial inner membrane|neuron projection development
EGLN3	386.003	564.147	207.858	0.368446	-1.44048	0.0157556	0.0747501	Down	2.12993	2.21935	2.07069	8.22231	7.85058	1.93554	GeneID:101117367	egl-9 family hypoxia inducible factor 3	GO:0001666,GO:0005506,GO:0005634,GO:0005654,GO:0005737,GO:0005829,GO:0006915,GO:0006919,GO:0006974,GO:0016706,GO:0018126,GO:0018401,GO:0031418,GO:0031545,GO:0042127,GO:0043523,GO:0061418	response to hypoxia|iron ion binding|nucleus|nucleoplasm|cytoplasm|cytosol|apoptotic process|activation of cysteine-type endopeptidase activity involved in apoptotic process|cellular response to DNA damage stimulus|oxidoreductase activity, acting on paired donors, with incorporation or reduction of molecular oxygen, 2-oxoglutarate as one donor, and incorporation of one atom each of oxygen into bo…	oas04066,oas05200,oas05211	HIF-1 signaling pathway|Pathways in cancer|Renal cell carcinoma
EM4B	5.38269	2.28126	8.48412	3.71731	1.89426	0.0455109	0.161003	Up	0.049572	0.0618256	0.043234	0.0122315	0.01243	0.0181443	GeneID:443149	EM4b protein	GO:0005044,GO:0005576,GO:0009897	scavenger receptor activity|extracellular region|external side of plasma membrane
EMCN	7.38466	12.3874	2.38192	0.191852	-2.38193	0.00631376	0.0379704	Down	0.0332096	0.0331349	0.0110338	0.0983309	0.155441	0.162071	GeneID:101109178	endomucin	GO:0005576,GO:0005886,GO:0016021	extracellular region|plasma membrane|integral component of membrane
EPDR1	38.2778	17.2652	59.2903	3.43328	1.77959	6.10045e-06	0.000122862	Up	0.650235	0.592844	0.71516	0.121714	0.146177	0.317331	GeneID:101107276	ependymin related 1	GO:0005509,GO:0005576,GO:0005764,GO:0007160	calcium ion binding|extracellular region|lysosome|cell-matrix adhesion
EPHA1	13.0822	5.86987	20.2944	3.4596	1.79061	0.0038993	0.025979	Up	0.122623	0.166042	0.235715	0.051868	0.0614944	0.042745	GeneID:101115703	EPH receptor A1			oas04360	Axon guidance
ESM1	73.0646	19.8733	126.256	6.3522	2.66726	6.18667e-17	7.81327e-15	Up	2.72426	3.11786	4.09968	0.579931	0.29467	0.729926	GeneID:101117876	endothelial cell specific molecule 1	GO:0001525,GO:0001558,GO:0002040,GO:0005171,GO:0005178,GO:0005520,GO:0005576,GO:0008284,GO:1902204	angiogenesis|regulation of cell growth|sprouting angiogenesis|hepatocyte growth factor receptor binding|integrin binding|insulin-like growth factor binding|extracellular region|positive regulation of cell proliferation|positive regulation of hepatocyte growth factor receptor signaling pathway
ESR1	19.9665	8.1488	31.7843	3.90198	1.96421	0.000324684	0.0036087	Up	0.153446	0.0656145	0.192274	0.0389434	0.0307807	0.0385125	GeneID:443228	estrogen receptor 1	GO:0003700,GO:0005496,GO:0005634,GO:0005794,GO:0005886,GO:0007200,GO:0007204,GO:0008270,GO:0010863,GO:0030284,GO:0030518,GO:0043124,GO:0043433,GO:0043565,GO:0045429,GO:0045893,GO:0051000,GO:0051091,GO:0071392	DNA-binding transcription factor activity|steroid binding|nucleus|Golgi apparatus|plasma membrane|phospholipase C-activating G protein-coupled receptor signaling pathway|positive regulation of cytosolic calcium ion concentration|zinc ion binding|positive regulation of phospholipase C activity|estrogen receptor activity|intracellular steroid hormone receptor signaling pathway|negative regulation o…	oas01522,oas04915,oas04917,oas04919,oas04961,oas05200,oas05205,oas05224	Endocrine resistance|Estrogen signaling pathway|Prolactin signaling pathway|Thyroid hormone signaling pathway|Endocrine and other factor-regulated calcium reabsorption|Pathways in cancer|Proteoglycans in cancer|Breast cancer
F2R	12.5073	19.2337	5.78082	0.300092	-1.73652	0.00662504	0.0393286	Down	0.0477535	0.0635281	0.0237989	0.196381	0.127723	0.13983	GeneID:101105757	coagulation factor II thrombin receptor	GO:0000186,GO:0001965,GO:0002248,GO:0003105,GO:0004930,GO:0005886,GO:0005887,GO:0005901,GO:0006919,GO:0006954,GO:0007186,GO:0007204,GO:0007205,GO:0007529,GO:0008284,GO:0008285,GO:0009611,GO:0014068,GO:0015057,GO:0030168,GO:0030194,GO:0030335,GO:0031094,GO:0031594,GO:0031681,GO:0032496,GO:0032651,GO:0032967,GO:0035025,GO:0043123,GO:0043280,GO:0043410,GO:0043524,GO:0045211,GO:0045893,GO:0045907,GO:…	activation of MAPKK activity|G-protein alpha-subunit binding|connective tissue replacement involved in inflammatory response wound healing|negative regulation of glomerular filtration|G protein-coupled receptor activity|plasma membrane|integral component of plasma membrane|caveola|activation of cysteine-type endopeptidase activity involved in apoptotic process|inflammatory response|G protein-coup…	oas04015,oas04020,oas04024,oas04072,oas04080,oas04151,oas04610,oas04611,oas04810,oas05200	Rap1 signaling pathway|Calcium signaling pathway|cAMP signaling pathway|Phospholipase D signaling pathway|Neuroactive ligand-receptor interaction|PI3K-Akt signaling pathway|Complement and coagulation cascades|Platelet activation|Regulation of actin cytoskeleton|Pathways in cancer
FABP4	43.8115	23.4838	64.1392	2.73111	1.44949	4.35213e-05	0.000658635	Up	3.95097	5.63155	3.72712	1.88012	2.05215	1.10181	GeneID:100137067	fatty acid binding protein 4, adipocyte	GO:0005324,GO:0005634,GO:0005737,GO:0015909,GO:0036041,GO:0050727	long-chain fatty acid transporter activity|nucleus|cytoplasm|long-chain fatty acid transport|long-chain fatty acid binding|regulation of inflammatory response	oas03320,oas04923	PPAR signaling pathway|Regulation of lipolysis in adipocytes
FAM189A1	4.06145	0.977147	7.14576	7.30326	2.86854	0.0235616	0.100402	Up	0.0563264	0.0561997	0.0187142	0	0.00627718	0.0122172	GeneID:101111054	family with sequence similarity 189 member A1	GO:0016021	integral component of membrane
FAM216B	3.42607	6.51753	0.334607	0.0559007	-4.16099	0.00913214	0.0501243	Down	0	0	0.0115326	0.137036	0.0232098	0.0677596	GeneID:101109104	family with sequence similarity 216 member B
FAM71E1	7.91385	3.91145	11.9162	3.04345	1.60571	0.0497441	0.171184	Up	0.394405	0.368924	0.0982797	0.121646	0.0741718	0.09624	GeneID:101117271	family with sequence similarity 71 member E1
FAM71E2	325.117	487.848	162.386	0.332863	-1.587	0.0198733	0.0887394	Down	1.76886	1.66802	1.72008	7.34518	7.30209	1.36856	GeneID:101120774	family with sequence similarity 71 member E2
FAM83A	11.9346	5.21539	18.6538	3.57613	1.8384	0.011838	0.0607272	Up	0.0351094	0.231201	0.118982	0.034652	0.0352142	0.0411222	GeneID:114116357	family with sequence similarity 83 member A	GO:0005737,GO:0007173,GO:0008283,GO:0019901,GO:0036312	cytoplasm|epidermal growth factor receptor signaling pathway|cell proliferation|protein kinase binding|phosphatidylinositol 3-kinase regulatory subunit binding
FBLN7	116.485	202.405	30.5643	0.150848	-2.72884	2.04786e-27	6.35326e-25	Down	0.431381	0.405816	0.270269	2.23829	2.33641	2.98344	GeneID:101118347	fibulin 7	GO:0005509,GO:0005576,GO:0005925,GO:0007155,GO:0008201	calcium ion binding|extracellular region|focal adhesion|cell adhesion|heparin binding
FBN2	178.708	255.325	102.092	0.399783	-1.32271	2.36703e-13	1.98705e-11	Down	0.253586	0.283998	0.239863	0.687001	0.755245	0.563219	GeneID:101104991	fibrillin 2	GO:0001527,GO:0005201,GO:0005509,GO:0005576,GO:0030023,GO:0030198,GO:0030326,GO:0030501,GO:0031012,GO:0035583,GO:0043010,GO:0045669,GO:0048048,GO:0060346,GO:0062023	microfibril|extracellular matrix structural constituent|calcium ion binding|extracellular region|extracellular matrix constituent conferring elasticity|extracellular matrix organization|embryonic limb morphogenesis|positive regulation of bone mineralization|extracellular matrix|sequestering of TGFbeta in extracellular matrix|camera-type eye development|positive regulation of osteoblast differenti…
FERMT3	87.6903	128.517	46.864	0.364503	-1.456	6.65952e-06	0.000132181	Down	0.661986	0.465596	0.367772	1.90653	1.60004	0.730871	GeneID:101115330	fermitin family member 3	GO:0002102,GO:0005178,GO:0007159,GO:0007229,GO:0030054,GO:0030335,GO:0033622,GO:0033632,GO:0034446,GO:0042995,GO:0070527	podosome|integrin binding|leukocyte cell-cell adhesion|integrin-mediated signaling pathway|cell junction|positive regulation of cell migration|integrin activation|regulation of cell-cell adhesion mediated by integrin|substrate adhesion-dependent cell spreading|cell projection|platelet aggregation	oas04611	Platelet activation
FGF1	22.2592	6.84128	37.6771	5.50359	2.46037	2.03398e-06	4.72751e-05	Up	0.292104	0.257558	0.203129	0.0335231	0.034067	0.0729348	GeneID:101109353	fibroblast growth factor 1	GO:0000187,GO:0001525,GO:0001759,GO:0005104,GO:0005178,GO:0005576,GO:0005615,GO:0005634,GO:0005829,GO:0005938,GO:0008083,GO:0008201,GO:0008284,GO:0008543,GO:0010595,GO:0030154,GO:0030324,GO:0030335,GO:0031012,GO:0032148,GO:0034605,GO:0044548,GO:0045542,GO:0045766,GO:0045944,GO:0050679,GO:0051781,GO:0060681,GO:0072163,GO:1901509,GO:1902533,GO:1903672,GO:2000544	activation of MAPK activity|angiogenesis|organ induction|fibroblast growth factor receptor binding|integrin binding|extracellular region|extracellular space|nucleus|cytosol|cell cortex|growth factor activity|heparin binding|positive regulation of cell proliferation|fibroblast growth factor receptor signaling pathway|positive regulation of endothelial cell migration|cell differentiation|lung devel…	oas04010,oas04014,oas04015,oas04151,oas04390,oas04810,oas05200,oas05218,oas05224,oas05226	MAPK signaling pathway|Ras signaling pathway|Rap1 signaling pathway|PI3K-Akt signaling pathway|Hippo signaling pathway|Regulation of actin cytoskeleton|Pathways in cancer|Melanoma|Breast cancer|Gastric cancer
FGF22	51.3868	33.5616	69.2119	2.06151	1.0437	0.00164361	0.0133121	Up	1.59218	1.5886	1.32249	0.916674	0.421414	0.906531	GeneID:101114608	fibroblast growth factor 22			oas04010,oas04014,oas04015,oas04151,oas04810,oas05200,oas05218,oas05224,oas05226	MAPK signaling pathway|Ras signaling pathway|Rap1 signaling pathway|PI3K-Akt signaling pathway|Regulation of actin cytoskeleton|Pathways in cancer|Melanoma|Breast cancer|Gastric cancer
FRAT1	20.1796	32.2225	8.13667	0.252466	-1.98584	0.00529444	0.0331513	Down	0.143345	0.0330051	0.0879244	0.108829	0.143773	0.817945	GeneID:105609583	FRAT regulator of WNT signaling pathway 1	GO:0005737,GO:0005829,GO:0043231,GO:0060070,GO:0090263,GO:1904886	cytoplasm|cytosol|intracellular membrane-bounded organelle|canonical Wnt signaling pathway|positive regulation of canonical Wnt signaling pathway|beta-catenin destruction complex disassembly	oas04310,oas05200,oas05224,oas05225,oas05226	Wnt signaling pathway|Pathways in cancer|Breast cancer|Hepatocellular carcinoma|Gastric cancer
FST	1080.52	573.464	1587.59	2.76838	1.46904	1.69543e-06	4.05965e-05	Up	13.4625	16.3416	16.4136	4.48758	4.54056	8.12332	GeneID:443323	follistatin	GO:0000122,GO:0002244,GO:0005576,GO:0038102,GO:0048185,GO:0051798	negative regulation of transcription by RNA polymerase II|hematopoietic progenitor cell differentiation|extracellular region|activin receptor antagonist activity|activin binding|positive regulation of hair follicle development	oas04350	TGF-beta signaling pathway
FTO	658.183	950.96	365.407	0.384257	-1.37986	2.24777e-43	2.00487e-40	Down	4.74061	4.71666	4.87115	13.2874	12.5013	12.6075	GeneID:100125353	FTO alpha-ketoglutarate dependent dioxygenase	GO:0001659,GO:0005634,GO:0005654,GO:0006307,GO:0008198,GO:0010883,GO:0016607,GO:0035515,GO:0035516,GO:0035552,GO:0035553,GO:0040014,GO:0042245,GO:0043734,GO:0044065,GO:0060612,GO:0070350,GO:0070989,GO:0080111,GO:0090335,GO:1990931	temperature homeostasis|nucleus|nucleoplasm|DNA dealkylation involved in DNA repair|ferrous iron binding|regulation of lipid storage|nuclear speck|oxidative RNA demethylase activity|oxidative DNA demethylase activity|oxidative single-stranded DNA demethylation|oxidative single-stranded RNA demethylation|regulation of multicellular organism growth|RNA repair|DNA-N1-methyladenine dioxygenase activi…
FXYD2	3.59953	6.52327	0.675794	0.103844	-3.26752	0.0208721	0.092076	Down	0	0.0310015	0.03097	0.122666	0.311642	0.181964	GeneID:114118392	FXYD domain containing ion transport regulator 2	GO:0005216,GO:0006813,GO:0006814,GO:0016021	ion channel activity|potassium ion transport|sodium ion transport|integral component of membrane	oas04022,oas04024,oas04260,oas04261,oas04911,oas04918,oas04919,oas04960,oas04961,oas04964,oas04970,oas04972,oas04973,oas04974,oas04976,oas04978	cGMP-PKG signaling pathway|cAMP signaling pathway|Cardiac muscle contraction|Adrenergic signaling in cardiomyocytes|Insulin secretion|Thyroid hormone synthesis|Thyroid hormone signaling pathway|Aldosterone-regulated sodium reabsorption|Endocrine and other factor-regulated calcium reabsorption|Proximal tubule bicarbonate reclamation|Salivary secretion|Pancreatic secretion|Carbohydrate digestion an…
FZD5	45.6076	24.4435	66.7717	2.73144	1.44966	0.000116938	0.00154807	Up	0.37875	0.209437	0.309289	0.0585494	0.123576	0.155889	GeneID:101118762	frizzled class receptor 5	GO:0000139,GO:0000578,GO:0001525,GO:0001540,GO:0002726,GO:0004930,GO:0005886,GO:0005887,GO:0005923,GO:0007223,GO:0007416,GO:0008285,GO:0008289,GO:0008595,GO:0009986,GO:0017147,GO:0019901,GO:0030182,GO:0030424,GO:0030425,GO:0030669,GO:0031077,GO:0031625,GO:0031901,GO:0032729,GO:0033077,GO:0035567,GO:0042813,GO:0043204,GO:0043507,GO:0044877,GO:0045202,GO:0045944,GO:0048469,GO:0048471,GO:0048596,GO:…	Golgi membrane|embryonic axis specification|angiogenesis|amyloid-beta binding|positive regulation of T cell cytokine production|G protein-coupled receptor activity|plasma membrane|integral component of plasma membrane|bicellular tight junction|Wnt signaling pathway, calcium modulating pathway|synapse assembly|negative regulation of cell proliferation|lipid binding|anterior/posterior axis specific…	oas04150,oas04310,oas04390,oas04550,oas04916,oas04934,oas05165,oas05200,oas05205,oas05217,oas05224,oas05225,oas05226	mTOR signaling pathway|Wnt signaling pathway|Hippo signaling pathway|Signaling pathways regulating pluripotency of stem cells|Melanogenesis|Cushing syndrome|Human papillomavirus infection|Pathways in cancer|Proteoglycans in cancer|Basal cell carcinoma|Breast cancer|Hepatocellular carcinoma|Gastric cancer
GABRA2	17.1404	6.51915	27.7617	4.25924	2.0906	0.000215258	0.00256423	Up	0.0765311	0.0795406	0.104887	0.00944176	0.0255865	0.0280118	GeneID:101121265	gamma-aminobutyric acid type A receptor alpha2 subunit	GO:0004890,GO:0005237,GO:0005254,GO:0005887,GO:0007165,GO:0007214,GO:0007268,GO:0022851,GO:0030054,GO:0030659,GO:0032590,GO:0034220,GO:0034707,GO:0042391,GO:0043005,GO:0045202,GO:0045211,GO:0050877,GO:0051932,GO:0060078,GO:0098794,GO:1902476,GO:1902711,GO:1904315	GABA-A receptor activity|inhibitory extracellular ligand-gated ion channel activity|chloride channel activity|integral component of plasma membrane|signal transduction|gamma-aminobutyric acid signaling pathway|chemical synaptic transmission|GABA-gated chloride ion channel activity|cell junction|cytoplasmic vesicle membrane|dendrite membrane|ion transmembrane transport|chloride channel complex|reg…	oas04080,oas04723,oas04727,oas04742,oas05032,oas05033	Neuroactive ligand-receptor interaction|Retrograde endocannabinoid signaling|GABAergic synapse|Taste transduction|Morphine addiction|Nicotine addiction
GAS6	820.82	1188.57	453.067	0.381084	-1.39182	4.93278e-35	2.42744e-32	Down	5.8112	5.95682	4.53624	15.2262	14.0376	14.8189	GeneID:101120928	growth arrest specific 6			oas01521	EGFR tyrosine kinase inhibitor resistance
GBP6	3.03909	0.651969	5.42622	8.32156	3.05685	0.0406247	0.148538	Up	0.0106712	0.0479125	0.026591	0	0.00535154	0.00520783	GeneID:101120875	guanylate binding protein family member 6	GO:0003924,GO:0005525,GO:0006955,GO:0042742,GO:0070062,GO:0071346	GTPase activity|GTP binding|immune response|defense response to bacterium|extracellular exosome|cellular response to interferon-gamma
GDF15	664.353	384.227	944.479	2.45813	1.29756	0.000778581	0.00727937	Up	24.6234	19.5371	18.6834	11.85	9.72908	4.81115	GeneID:100913168	growth differentiation factor 15			oas04060	Cytokine-cytokine receptor interaction
GDPD3	80.391	109.549	51.2331	0.467508	-1.09694	6.29094e-06	0.000126093	Down	0.652092	0.662901	0.539593	1.36005	1.44382	1.28496	GeneID:101114996	glycerophosphodiester phosphodiesterase domain containing 3	GO:0005789,GO:0008081,GO:0016021,GO:0034638,GO:0046872,GO:0048471,GO:0070062	endoplasmic reticulum membrane|phosphoric diester hydrolase activity|integral component of membrane|phosphatidylcholine catabolic process|metal ion binding|perinuclear region of cytoplasm|extracellular exosome	oas00565	Ether lipid metabolism
GFRA3	15.5708	9.13438	22.0073	2.41054	1.26935	0.0287325	0.115638	Up	0.141199	0.148297	0.19259	0.0293389	0.11926	0.0580285	GeneID:101109876	GDNF family receptor alpha 3	GO:0000165,GO:0001764,GO:0005088,GO:0005102,GO:0005829,GO:0005886,GO:0007165,GO:0007399,GO:0007411,GO:0007422,GO:0008046,GO:0009897,GO:0019898,GO:0031225,GO:0043235,GO:0048485	MAPK cascade|neuron migration|Ras guanyl-nucleotide exchange factor activity|signaling receptor binding|cytosol|plasma membrane|signal transduction|nervous system development|axon guidance|peripheral nervous system development|axon guidance receptor activity|external side of plasma membrane|extrinsic component of membrane|anchored component of membrane|receptor complex|sympathetic nervous system …
GLRA3	33.9986	10.7622	57.235	5.31981	2.41138	1.34284e-07	4.12121e-06	Up	0.330008	0.708421	0.647896	0.167789	0.100301	0.0585645	GeneID:101119614	glycine receptor alpha 3	GO:0004888,GO:0005886,GO:0005887,GO:0007165,GO:0007218,GO:0007268,GO:0016594,GO:0016934,GO:0016935,GO:0022852,GO:0030054,GO:0030425,GO:0034220,GO:0042391,GO:0043005,GO:0043200,GO:0043204,GO:0045202,GO:0045211,GO:0046872,GO:0050877,GO:0051260,GO:0060012,GO:1902476	transmembrane signaling receptor activity|plasma membrane|integral component of plasma membrane|signal transduction|neuropeptide signaling pathway|chemical synaptic transmission|glycine binding|extracellularly glycine-gated chloride channel activity|glycine-gated chloride channel complex|glycine-gated chloride ion channel activity|cell junction|dendrite|ion transmembrane transport|regulation of m…	oas04080	Neuroactive ligand-receptor interaction
GPC3	45.1481	81.8051	8.49108	0.103661	-3.27006	1.20374e-14	1.16071e-12	Down	0.177128	0.0631177	0.0756643	0.899076	0.951733	1.2843	GeneID:101119285	glypican 3	GO:0042074,GO:0045732,GO:0045807,GO:0045879,GO:0046658,GO:0060422,GO:0060828,GO:0060976,GO:0062023,GO:0072111,GO:0072180,GO:0090263,GO:2000050	cell migration involved in gastrulation|positive regulation of protein catabolic process|positive regulation of endocytosis|negative regulation of smoothened signaling pathway|anchored component of plasma membrane|peptidyl-dipeptidase inhibitor activity|regulation of canonical Wnt signaling pathway|coronary vasculature development|collagen-containing extracellular matrix|cell proliferation involv…	oas05205	Proteoglycans in cancer
GPM6A	260.486	426.708	94.2646	0.220904	-2.17851	4.09109e-06	8.72705e-05	Down	0.668766	0.505124	0.560679	1.83828	1.78034	4.44114	GeneID:101106904	glycoprotein M6A	GO:0001764,GO:0003407,GO:0005886,GO:0007416,GO:0016021,GO:0030175,GO:0043005,GO:0043025,GO:0043197,GO:0044295,GO:0048812,GO:0048863,GO:0051491	neuron migration|neural retina development|plasma membrane|synapse assembly|integral component of membrane|filopodium|neuron projection|neuronal cell body|dendritic spine|axonal growth cone|neuron projection morphogenesis|stem cell differentiation|positive regulation of filopodium assembly
GPM6B	11.5311	17.6026	5.4595	0.309318	-1.69284	0.0213632	0.0937209	Down	0.0455421	0.0454396	0	0.0674231	0.114195	0.122241	GeneID:101120549	glycoprotein M6B	GO:0001503,GO:0005886,GO:0015031,GO:0016021,GO:0030501,GO:0032956,GO:0045121,GO:0051612,GO:0051893,GO:0085029,GO:2000009	ossification|plasma membrane|protein transport|integral component of membrane|positive regulation of bone mineralization|regulation of actin cytoskeleton organization|membrane raft|negative regulation of serotonin uptake|regulation of focal adhesion assembly|extracellular matrix assembly|negative regulation of protein localization to cell surface
GPR150	16.4507	24.7585	8.14294	0.328717	-1.60508	0.00559322	0.0347047	Down	0.155314	0.174335	0.135457	0.306582	0.369972	0.776922	GeneID:105607633	G protein-coupled receptor 150	GO:0004930,GO:0005886,GO:0005887,GO:0007186,GO:0032870	G protein-coupled receptor activity|plasma membrane|integral component of plasma membrane|G protein-coupled receptor signaling pathway|cellular response to hormone stimulus
GPR183	5.91144	9.78222	2.04067	0.208216	-2.26385	0.0175053	0.0805864	Down	0.0083732	0.0125315	0.00417294	0.0495847	0.041991	0.0326907	GeneID:101111463	G protein-coupled receptor 183	GO:0002250,GO:0002313,GO:0002407,GO:0004930,GO:0005886,GO:0006959,GO:0007186,GO:0008142,GO:0010818,GO:0016021,GO:0030316,GO:0030595,GO:0030890,GO:0036145,GO:0061470,GO:0070374,GO:2000458	adaptive immune response|mature B cell differentiation involved in immune response|dendritic cell chemotaxis|G protein-coupled receptor activity|plasma membrane|humoral immune response|G protein-coupled receptor signaling pathway|oxysterol binding|T cell chemotaxis|integral component of membrane|osteoclast differentiation|leukocyte chemotaxis|positive regulation of B cell proliferation|dendritic …
GRIA2	6.53213	2.61218	10.4521	4.00794	2.00286	0.0401334	0.147186	Up	0.0101921	0.0142369	0.0386038	0.00603562	0.0102226	0	GeneID:443272	glutamate ionotropic receptor AMPA type subunit 2	GO:0001540,GO:0004970,GO:0004971,GO:0005231,GO:0005789,GO:0005886,GO:0005887,GO:0007165,GO:0007268,GO:0009897,GO:0030054,GO:0030425,GO:0030666,GO:0032281,GO:0035235,GO:0035249,GO:0043197,GO:0045211,GO:0060076,GO:0098794,GO:0098843	amyloid-beta binding|ionotropic glutamate receptor activity|AMPA glutamate receptor activity|excitatory extracellular ligand-gated ion channel activity|endoplasmic reticulum membrane|plasma membrane|integral component of plasma membrane|signal transduction|chemical synaptic transmission|external side of plasma membrane|cell junction|dendrite|endocytic vesicle membrane|AMPA glutamate receptor comp…	oas04024,oas04080,oas04713,oas04720,oas04723,oas04724,oas04728,oas04730,oas05014,oas05030,oas05031,oas05033	cAMP signaling pathway|Neuroactive ligand-receptor interaction|Circadian entrainment|Long-term potentiation|Retrograde endocannabinoid signaling|Glutamatergic synapse|Dopaminergic synapse|Long-term depression|Amyotrophic lateral sclerosis (ALS)|Cocaine addiction|Amphetamine addiction|Nicotine addiction
GSG1L	45.2193	60.689	29.7496	0.490517	-1.02763	0.0274109	0.11183	Down	0.458045	0.41893	0.798964	1.7518	1.45481	0.316678	GeneID:101120720	GSG1 like	GO:0005886,GO:0030054,GO:0098685,GO:0098978,GO:0099061,GO:0099149,GO:2000311	plasma membrane|cell junction|Schaffer collateral - CA1 synapse|glutamatergic synapse|integral component of postsynaptic density membrane|regulation of postsynaptic neurotransmitter receptor internalization|regulation of AMPA receptor activity
GYPC	15.8145	22.5018	9.12714	0.406112	-1.30005	0.022797	0.0981109	Down	0.228681	0.0912669	0.296316	0.406264	0.688093	0.46873	GeneID:100885767	glycophorin C (Gerbich blood group)			oas05144	Malaria
HAPLN4	154.683	208.397	100.969	0.484599	-1.04514	5.45303e-07	1.46279e-05	Down	0.718976	0.780424	0.850507	1.88709	1.92564	1.18759	GeneID:101105570	hyaluronan and proteoglycan link protein 4	GO:0005540,GO:0007155,GO:0007417,GO:0031012	hyaluronic acid binding|cell adhesion|central nervous system development|extracellular matrix
HES2	8.74866	3.25877	14.2386	4.36825	2.12706	0.00690854	0.0405968	Up	0.178691	0.205718	0.191809	0.0813983	0.0137865	0.0402488	GeneID:101117179	hes family bHLH transcription factor 2	GO:0000977,GO:0000978,GO:0000981,GO:0001078,GO:0001756,GO:0003714,GO:0005634,GO:0007219,GO:0008134,GO:0030154,GO:0043565,GO:0046983,GO:0050767,GO:1990837	RNA polymerase II regulatory region sequence-specific DNA binding|RNA polymerase II proximal promoter sequence-specific DNA binding|DNA-binding transcription factor activity, RNA polymerase II-specific|proximal promoter DNA-binding transcription repressor activity, RNA polymerase II-specific|somitogenesis|transcription corepressor activity|nucleus|Notch signaling pathway|transcription factor bind…	oas05165	Human papillomavirus infection
HEY1	22.8075	12.3806	33.2344	2.6835	1.42412	0.00400962	0.0265282	Up	0.41435	0.425946	0.387968	0.0619624	0.151123	0.257362	GeneID:101111557	hes related family bHLH transcription factor with YRPW motif 1	GO:0000977,GO:0001077,GO:0001078,GO:0001525,GO:0001568,GO:0003714,GO:0005634,GO:0007219,GO:0007507,GO:0008134,GO:0030154,GO:0035939,GO:0043565,GO:0045746,GO:0045944,GO:0046983,GO:0050767,GO:0060412,GO:1990837,GO:2000678,GO:2000820	RNA polymerase II regulatory region sequence-specific DNA binding|proximal promoter DNA-binding transcription activator activity, RNA polymerase II-specific|proximal promoter DNA-binding transcription repressor activity, RNA polymerase II-specific|angiogenesis|blood vessel development|transcription corepressor activity|nucleus|Notch signaling pathway|heart development|transcription factor binding…	oas05165,oas05200,oas05224	Human papillomavirus infection|Pathways in cancer|Breast cancer
HMMR	28.3203	14.9885	41.6522	2.77893	1.47453	0.000510202	0.00515658	Up	0.273391	0.366542	0.408748	0.11805	0.0942586	0.175116	GeneID:443128	hyaluronan mediated motility receptor	GO:0005540,GO:0005813,GO:0005829,GO:0005886,GO:0009986,GO:0010389,GO:0015630,GO:0016020,GO:0030214	hyaluronic acid binding|centrosome|cytosol|plasma membrane|cell surface|regulation of G2/M transition of mitotic cell cycle|microtubule cytoskeleton|membrane|hyaluronan catabolic process	oas04512	ECM-receptor interaction
HPCAL4	22.2351	8.80005	35.6701	4.05127	2.01838	9.76482e-05	0.00132971	Up	0.313366	0.15633	0.138819	0.0572747	0.0407428	0.0566409	GeneID:101119857	hippocalcin like 4	GO:0005246,GO:0005509,GO:0007165	calcium channel regulator activity|calcium ion binding|signal transduction
HSD17B14	375.937	539.942	211.931	0.392653	-1.34867	1.10591e-19	1.79346e-17	Down	5.04008	4.12112	6.19991	14.6078	13.8831	11.7825	GeneID:101123575	hydroxysteroid 17-beta dehydrogenase 14	GO:0004303,GO:0005829,GO:0006706,GO:0042802,GO:0047045	estradiol 17-beta-dehydrogenase activity|cytosol|steroid catabolic process|identical protein binding|testosterone 17-beta-dehydrogenase (NADP+) activity
HSPB8	333.814	116.029	551.599	4.75332	2.24894	1.1125e-50	2.26808e-47	Up	7.56497	7.71631	7.55431	1.37393	1.55136	2.01751	GeneID:101108164	heat shock protein family B (small) member 8	GO:0005634,GO:0005737,GO:0005829,GO:0042802	nucleus|cytoplasm|cytosol|identical protein binding
HTR7	15.4871	22.1555	8.81879	0.397908	-1.32949	0.0292425	0.116929	Down	0.12561	0.125328	0.111289	0.468346	0.111987	0.354184	GeneID:101122994	5-hydroxytryptamine receptor 7	GO:0004930,GO:0004993,GO:0005886,GO:0005887,GO:0006939,GO:0007186,GO:0007187,GO:0007268,GO:0007623,GO:0008015,GO:0030425,GO:0030594,GO:0042310	G protein-coupled receptor activity|G protein-coupled serotonin receptor activity|plasma membrane|integral component of plasma membrane|smooth muscle contraction|G protein-coupled receptor signaling pathway|G protein-coupled receptor signaling pathway, coupled to cyclic nucleotide second messenger|chemical synaptic transmission|circadian rhythm|blood circulation|dendrite|neurotransmitter receptor…	oas04014,oas04020,oas04080,oas04726	Ras signaling pathway|Calcium signaling pathway|Neuroactive ligand-receptor interaction|Serotonergic synapse
IBSP	127.834	221.376	34.2913	0.154758	-2.69191	2.65787e-32	1.05362e-29	Down	0.497678	0.458362	0.330703	2.83381	3.00778	2.72772	GeneID:101120495	integrin binding sialoprotein	GO:0005178,GO:0005615,GO:0007155,GO:0030198,GO:0030282,GO:0031012,GO:0031982,GO:0045785,GO:0071363	integrin binding|extracellular space|cell adhesion|extracellular matrix organization|bone mineralization|extracellular matrix|vesicle|positive regulation of cell adhesion|cellular response to growth factor stimulus	oas04151,oas04510,oas04512,oas05165	PI3K-Akt signaling pathway|Focal adhesion|ECM-receptor interaction|Human papillomavirus infection
IGF1	3513.7	4856.25	2171.14	0.447059	-1.16146	9.62608e-40	6.54161e-37	Down	6.2145	5.60416	5.23145	11.8536	13.3439	14.0899	GeneID:443318	insulin like growth factor 1			oas01521,oas01522,oas04010,oas04014,oas04015,oas04066,oas04068,oas04114,oas04115,oas04150,oas04151,oas04152,oas04211,oas04213,oas04510,oas04550,oas04730,oas04750,oas04913,oas04914,oas04960,oas05200,oas05202,oas05205,oas05214,oas05215,oas05218,oas05224,oas05410,oas05414	EGFR tyrosine kinase inhibitor resistance|Endocrine resistance|MAPK signaling pathway|Ras signaling pathway|Rap1 signaling pathway|HIF-1 signaling pathway|FoxO signaling pathway|Oocyte meiosis|p53 signaling pathway|mTOR signaling pathway|PI3K-Akt signaling pathway|AMPK signaling pathway|Longevity regulating pathway|Longevity regulating pathway - multiple species|Focal adhesion|Signaling pathways …
IGF2	11.4917	18.9019	4.08147	0.215516	-2.21414	0.00155338	0.0127112	Down	0.0609322	0.0405301	0.0202445	0.230531	0.132414	0.218068	GeneID:443325	insulin like growth factor 2	GO:0000122,GO:0001503,GO:0001701,GO:0001892,GO:0005178,GO:0005179,GO:0005615,GO:0006006,GO:0008083,GO:0008284,GO:0031056,GO:0051147,GO:0051781,GO:0060669	negative regulation of transcription by RNA polymerase II|ossification|in utero embryonic development|embryonic placenta development|integrin binding|hormone activity|extracellular space|glucose metabolic process|growth factor activity|positive regulation of cell proliferation|regulation of histone modification|regulation of muscle cell differentiation|positive regulation of cell division|embryon…	oas04010,oas04014,oas04151,oas05200,oas05205,oas05225	MAPK signaling pathway|Ras signaling pathway|PI3K-Akt signaling pathway|Pathways in cancer|Proteoglycans in cancer|Hepatocellular carcinoma
IGFBP3	163.891	104.898	222.885	2.12429	1.08698	1.13511e-05	0.000209834	Up	2.62895	2.72749	2.27254	0.929959	0.851709	1.90746	GeneID:100286737	insulin like growth factor binding protein 3	GO:0001558,GO:0001649,GO:0001933,GO:0001968,GO:0005615,GO:0005634,GO:0006468,GO:0008160,GO:0010906,GO:0014912,GO:0031994,GO:0031995,GO:0032868,GO:0042567,GO:0043065,GO:0043410,GO:0043568,GO:0044342,GO:0045663,GO:0048662	regulation of cell growth|osteoblast differentiation|negative regulation of protein phosphorylation|fibronectin binding|extracellular space|nucleus|protein phosphorylation|protein tyrosine phosphatase activator activity|regulation of glucose metabolic process|negative regulation of smooth muscle cell migration|insulin-like growth factor I binding|insulin-like growth factor II binding|response to …	oas04115,oas04218,oas05202	p53 signaling pathway|Cellular senescence|Transcriptional misregulation in cancer
IL13RA2	25.8705	12.3777	39.3633	3.17831	1.66826	0.000323998	0.00360387	Up	0.886002	0.783553	0.662334	0.178867	0.161572	0.412737	GeneID:101108025	interleukin 13 receptor subunit alpha 2	GO:0002638,GO:0004896,GO:0009897,GO:0016021,GO:0016064,GO:0019955,GO:0043235,GO:0043305	negative regulation of immunoglobulin production|cytokine receptor activity|external side of plasma membrane|integral component of membrane|immunoglobulin mediated immune response|cytokine binding|receptor complex|negative regulation of mast cell degranulation	oas04060,oas04630	Cytokine-cytokine receptor interaction|Jak-STAT signaling pathway
IL1RN	28.1276	17.2799	38.9752	2.25566	1.17355	0.0107267	0.0566756	Up	0.355139	0.531511	0.471974	0.362196	0.130606	0.127099	GeneID:780505	interleukin 1 receptor antagonist	GO:0001660,GO:0002439,GO:0005125,GO:0005149,GO:0005150,GO:0005151,GO:0005615,GO:0006629,GO:0007565,GO:0007613,GO:0014050,GO:0014823,GO:0019221,GO:0019233,GO:0019752,GO:0030073,GO:0030336,GO:0030593,GO:0031982,GO:0032755,GO:0034115,GO:0042493,GO:0042594,GO:0043066,GO:0043123,GO:0043507,GO:0045352,GO:0045353,GO:0045837,GO:0046330,GO:0051384,GO:0070555,GO:0070670,GO:0071222,GO:0071874,GO:2000660	fever generation|chronic inflammatory response to antigenic stimulus|cytokine activity|interleukin-1 receptor binding|interleukin-1, type I receptor binding|interleukin-1, type II receptor binding|extracellular space|lipid metabolic process|female pregnancy|memory|negative regulation of glutamate secretion|response to activity|cytokine-mediated signaling pathway|sensory perception of pain|carboxy…	oas04060	Cytokine-cytokine receptor interaction
IL21R	4.08652	7.50383	0.669213	0.0900271	-3.4735	0.0133706	0.0663524	Down	0	0	0.0327982	0.0974306	0.198023	0.0802937	GeneID:100820753	interleukin 21 receptor			oas04060,oas04630,oas04659,oas05321	Cytokine-cytokine receptor interaction|Jak-STAT signaling pathway|Th17 cell differentiation|Inflammatory bowel disease (IBD)
IL36A	110.454	59.3293	161.578	2.72375	1.4456	1.84833e-11	1.16714e-09	Up	2.46319	2.29806	2.85371	0.884035	0.962548	1.03037	GeneID:101106251	interleukin 36 alpha			oas04060	Cytokine-cytokine receptor interaction
IL36B	95.0783	58.0258	132.131	2.27732	1.18734	3.01486e-07	8.55369e-06	Up	3.88761	2.91603	3.92989	1.63275	1.54862	1.66851	GeneID:101105996	interleukin 36 beta	GO:0001819,GO:0005125,GO:0005149,GO:0005615,GO:0006954,GO:0019221,GO:0030593,GO:0032755,GO:0043123,GO:0045087,GO:0045582,GO:0046330,GO:0071222	positive regulation of cytokine production|cytokine activity|interleukin-1 receptor binding|extracellular space|inflammatory response|cytokine-mediated signaling pathway|neutrophil chemotaxis|positive regulation of interleukin-6 production|positive regulation of I-kappaB kinase/NF-kappaB signaling|innate immune response|positive regulation of T cell differentiation|positive regulation of JNK casc…	oas04060	Cytokine-cytokine receptor interaction
IL6	8079.73	4450.41	11709.1	2.63102	1.39562	6.01561e-49	9.53876e-46	Up	309.837	289.114	282.347	125.596	125.915	93.8594	GeneID:443406	interleukin 6	GO:0005125,GO:0005138,GO:0005615,GO:0006953,GO:0008083,GO:0050870,GO:0050871,GO:0071354,GO:0072540	cytokine activity|interleukin-6 receptor binding|extracellular space|acute-phase response|growth factor activity|positive regulation of T cell activation|positive regulation of B cell activation|cellular response to interleukin-6|T-helper 17 cell lineage commitment	oas01521,oas01523,oas04060,oas04066,oas04068,oas04151,oas04218,oas04620,oas04621,oas04623,oas04625,oas04630,oas04640,oas04657,oas04659,oas04668,oas04672,oas04931,oas04932,oas04933,oas05020,oas05132,oas05133,oas05134,oas05142,oas05143,oas05144,oas05146,oas05152,oas05161,oas05162,oas05163,oas05164,oas05166,oas05167,oas05168,oas05169,oas05200,oas05202,oas05321,oas05323,oas05332,oas05410	EGFR tyrosine kinase inhibitor resistance|Antifolate resistance|Cytokine-cytokine receptor interaction|HIF-1 signaling pathway|FoxO signaling pathway|PI3K-Akt signaling pathway|Cellular senescence|Toll-like receptor signaling pathway|NOD-like receptor signaling pathway|Cytosolic DNA-sensing pathway|C-type lectin receptor signaling pathway|Jak-STAT signaling pathway|Hematopoietic cell lineage|IL-1…
IMPA2	27.0628	43.6405	10.4851	0.240448	-2.05621	8.48094e-05	0.00118542	Down	0.0547983	0.0781073	0.109239	0.25497	0.180589	0.595987	GeneID:101105968	inositol monophosphatase 2	GO:0005737,GO:0005829,GO:0006021,GO:0006796,GO:0007165,GO:0008934,GO:0042803,GO:0043647,GO:0046854,GO:0046855,GO:0046872,GO:0052832,GO:0052833	cytoplasm|cytosol|inositol biosynthetic process|phosphate-containing compound metabolic process|signal transduction|inositol monophosphate 1-phosphatase activity|protein homodimerization activity|inositol phosphate metabolic process|phosphatidylinositol phosphorylation|inositol phosphate dephosphorylation|metal ion binding|inositol monophosphate 3-phosphatase activity|inositol monophosphate 4-pho…	oas00562,oas04070	Inositol phosphate metabolism|Phosphatidylinositol signaling system
INA	22.5672	6.84164	38.2928	5.59523	2.4842	1.79792e-06	4.27634e-05	Up	0.253452	0.383684	0.348449	0.0776329	0.0262975	0.0767739	GeneID:101115747	internexin neuronal intermediate filament protein alpha	GO:0005200,GO:0005615,GO:0005654,GO:0005883,GO:0021762,GO:0030154,GO:0031965,GO:0036464,GO:0043209,GO:0045111,GO:0060052,GO:0098685,GO:0098794,GO:0098973,GO:0099184,GO:1990830	structural constituent of cytoskeleton|extracellular space|nucleoplasm|neurofilament|substantia nigra development|cell differentiation|nuclear membrane|cytoplasmic ribonucleoprotein granule|myelin sheath|intermediate filament cytoskeleton|neurofilament cytoskeleton organization|Schaffer collateral - CA1 synapse|postsynapse|structural constituent of postsynaptic actin cytoskeleton|structural const…
INHBE	707.286	1006.19	408.381	0.405862	-1.30094	2.15531e-05	0.000365737	Down	5.22109	5.36144	4.68492	16.061	14.7672	7.99745	GeneID:101121588	inhibin subunit beta E	GO:0005125,GO:0005160,GO:0005179,GO:0005615,GO:0008083,GO:0010862,GO:0042981,GO:0043408,GO:0048468,GO:0060395	cytokine activity|transforming growth factor beta receptor binding|hormone activity|extracellular space|growth factor activity|positive regulation of pathway-restricted SMAD protein phosphorylation|regulation of apoptotic process|regulation of MAPK cascade|cell development|SMAD protein signal transduction	oas04060,oas04350,oas04550	Cytokine-cytokine receptor interaction|TGF-beta signaling pathway|Signaling pathways regulating pluripotency of stem cells
INPP5J	13.0337	18.9283	7.13905	0.376826	-1.40803	0.0368784	0.138318	Down	0.0438875	0.0625554	0.0249968	0.123759	0.194939	0.0428364	GeneID:101103674	inositol polyphosphate-5-phosphatase J	GO:0001726,GO:0004439,GO:0004445,GO:0005737,GO:0005829,GO:0005886,GO:0006661,GO:0010977,GO:0017124,GO:0030426,GO:0031115,GO:0033137,GO:0034485,GO:0043198,GO:0043647,GO:0046855,GO:0046856,GO:0052658,GO:0052659	ruffle|phosphatidylinositol-4,5-bisphosphate 5-phosphatase activity|inositol-polyphosphate 5-phosphatase activity|cytoplasm|cytosol|plasma membrane|phosphatidylinositol biosynthetic process|negative regulation of neuron projection development|SH3 domain binding|growth cone|negative regulation of microtubule polymerization|negative regulation of peptidyl-serine phosphorylation|phosphatidylinositol…	oas00562,oas04070	Inositol phosphate metabolism|Phosphatidylinositol signaling system
ISLR	5756.73	8234.99	3278.47	0.398097	-1.32881	8.9534e-42	7.51612e-39	Down	43.7429	34.9065	31.7787	94.2214	93.9359	97.6707	GeneID:101110878	immunoglobulin superfamily containing leucine rich repeat	GO:0005576	extracellular region
ITIH4	60.6867	94.536	26.8375	0.283596	-1.81809	2.412e-09	1.05913e-07	Down	0.278395	0.220581	0.146905	0.703084	0.796617	0.847152	GeneID:101108959	inter-alpha-trypsin inhibitor heavy chain family member 4	GO:0004867,GO:0005576,GO:0006953,GO:0030212	serine-type endopeptidase inhibitor activity|extracellular region|acute-phase response|hyaluronan metabolic process
KBTBD6	96.5121	130.709	62.3153	0.476898	-1.06825	4.34846e-06	9.26222e-05	Down	0.366325	0.269909	0.398835	0.728668	0.683965	0.81962	GeneID:101122871	kelch repeat and BTB domain containing 6	GO:0005829,GO:0043687	cytosol|post-translational protein modification
KCNAB1	136.046	82.475	189.616	2.29869	1.20081	1.13676e-09	5.35403e-08	Up	0.954442	1.12885	0.908573	0.486881	0.408731	0.444858	GeneID:101110988	potassium voltage-gated channel subfamily A member regulatory beta subunit 1	GO:0004033,GO:0005249,GO:0005829,GO:0005886,GO:0007420,GO:0007507,GO:0007519,GO:0007611,GO:0008076,GO:0015459,GO:0016020,GO:0019904,GO:0030424,GO:0031234,GO:0032839,GO:0034705,GO:0043025,GO:0043204,GO:0044224,GO:0044325,GO:0045445,GO:0055114,GO:0060539,GO:0070402,GO:1902259,GO:1902260,GO:1990635	aldo-keto reductase (NADP) activity|voltage-gated potassium channel activity|cytosol|plasma membrane|brain development|heart development|skeletal muscle tissue development|learning or memory|voltage-gated potassium channel complex|potassium channel regulator activity|membrane|protein domain specific binding|axon|extrinsic component of cytoplasmic side of plasma membrane|dendrite cytoplasm|potassi…
KCNC3	22.2552	31.6166	12.8937	0.407618	-1.29471	0.00461136	0.0295504	Down	0.0601682	0.0480263	0.0439794	0.11481	0.120696	0.148776	GeneID:101116251	potassium voltage-gated channel subfamily C member 3	GO:0005249,GO:0005251,GO:0005856,GO:0005886,GO:0005938,GO:0008076,GO:0016021,GO:0030054,GO:0030424,GO:0032590,GO:0032591,GO:0032809,GO:0034765,GO:0042734,GO:0043025,GO:0043204,GO:0051260,GO:0051262,GO:0071805	voltage-gated potassium channel activity|delayed rectifier potassium channel activity|cytoskeleton|plasma membrane|cell cortex|voltage-gated potassium channel complex|integral component of membrane|cell junction|axon|dendrite membrane|dendritic spine membrane|neuronal cell body membrane|regulation of ion transmembrane transport|presynaptic membrane|neuronal cell body|perikaryon|protein homooligom…
KCNE4	55.1932	88.6803	21.706	0.244704	-2.03089	7.13287e-11	4.18902e-09	Down	0.267514	0.184785	0.205109	0.96472	0.939094	0.863662	GeneID:101120989	potassium voltage-gated channel subfamily E regulatory subunit 4	GO:0005249,GO:0015459,GO:0016021,GO:0016324,GO:0044325,GO:0060307,GO:0071435,GO:0086005,GO:0086011,GO:0086091,GO:0098915,GO:1902260	voltage-gated potassium channel activity|potassium channel regulator activity|integral component of membrane|apical plasma membrane|ion channel binding|regulation of ventricular cardiac muscle cell membrane repolarization|potassium ion export|ventricular cardiac muscle cell action potential|membrane repolarization during action potential|regulation of heart rate by cardiac conduction|membrane rep…
KCNJ8	84.5094	122.228	46.7904	0.382757	-1.3855	1.76362e-08	6.48677e-07	Down	0.641144	0.743839	0.668776	1.89837	1.58521	2.03745	GeneID:101118008	potassium voltage-gated channel subfamily J member 8	GO:0001822,GO:0005242,GO:0005524,GO:0005739,GO:0005886,GO:0006813,GO:0007507,GO:0008076,GO:0008282,GO:0010107,GO:0015272,GO:0017098,GO:0030016,GO:0032496,GO:0034765,GO:0042383,GO:0043330,GO:0051607,GO:0098915,GO:1902282,GO:1990573	kidney development|inward rectifier potassium channel activity|ATP binding|mitochondrion|plasma membrane|potassium ion transport|heart development|voltage-gated potassium channel complex|inward rectifying potassium channel|potassium ion import|ATP-activated inward rectifier potassium channel activity|sulfonylurea receptor binding|myofibril|response to lipopolysaccharide|regulation of ion transmem…	oas04022	cGMP-PKG signaling pathway
KCNQ1	18.8278	1.96003	35.6956	18.2318	4.18838	5.66918e-08	1.90813e-06	Up	0.374126	0.400598	0.181905	0.00900614	0.0457613	0	GeneID:101119596	potassium voltage-gated channel subfamily Q member 1	GO:0005249,GO:0005251,GO:0005516,GO:0005546,GO:0005737,GO:0005764,GO:0005769,GO:0005770,GO:0005783,GO:0005886,GO:0006349,GO:0008076,GO:0008157,GO:0010460,GO:0015271,GO:0016323,GO:0016458,GO:0030659,GO:0034236,GO:0034237,GO:0034702,GO:0035690,GO:0044325,GO:0045121,GO:0048839,GO:0050892,GO:0060307,GO:0060372,GO:0060452,GO:0060453,GO:0070293,GO:0071320,GO:0072358,GO:0086009,GO:0086089,GO:0086091,GO:…	voltage-gated potassium channel activity|delayed rectifier potassium channel activity|calmodulin binding|phosphatidylinositol-4,5-bisphosphate binding|cytoplasm|lysosome|early endosome|late endosome|endoplasmic reticulum|plasma membrane|regulation of gene expression by genetic imprinting|voltage-gated potassium channel complex|protein phosphatase 1 binding|positive regulation of heart rate|outwar…	oas04261,oas04725,oas04971,oas04972,oas04974	Adrenergic signaling in cardiomyocytes|Cholinergic synapse|Gastric acid secretion|Pancreatic secretion|Protein digestion and absorption
KIF1A	31.6922	43.6798	19.7046	0.450693	-1.14978	0.00333222	0.0230286	Down	0.0728125	0.0830271	0.0449274	0.16426	0.135627	0.159059	GeneID:101103691	kinesin family member 1A	GO:0003774,GO:0003777,GO:0005524,GO:0005829,GO:0005871,GO:0005874,GO:0007018,GO:0008017,GO:0008021,GO:0008089,GO:0008574,GO:0016192,GO:0016887,GO:0022027,GO:0030424,GO:0030425,GO:0030705,GO:0042802,GO:0042803,GO:0043005,GO:0043025,GO:0098794,GO:0098840,GO:1904115,GO:1990048,GO:1990049	motor activity|microtubule motor activity|ATP binding|cytosol|kinesin complex|microtubule|microtubule-based movement|microtubule binding|synaptic vesicle|anterograde axonal transport|ATP-dependent microtubule motor activity, plus-end-directed|vesicle-mediated transport|ATPase activity|interkinetic nuclear migration|axon|dendrite|cytoskeleton-dependent intracellular transport|identical protein bin…
KIF21B	810.133	1113.94	506.328	0.454518	-1.13759	2.80742e-17	3.64225e-15	Down	1.80416	1.50278	1.52062	4.22306	3.92122	2.8074	GeneID:101108506	kinesin family member 21B	GO:0003777,GO:0005524,GO:0005871,GO:0005874,GO:0007018,GO:0008017,GO:0016887,GO:0030425,GO:0030426,GO:0031410	microtubule motor activity|ATP binding|kinesin complex|microtubule|microtubule-based movement|microtubule binding|ATPase activity|dendrite|growth cone|cytoplasmic vesicle
KLHL3	19.7596	13.043	26.4762	2.02936	1.02103	0.0318878	0.124713	Up	0.10695	0.11052	0.0799506	0.0490083	0.0574655	0.0447379	GeneID:101107091	kelch like family member 3	GO:0003779,GO:0005829,GO:0005856,GO:0006511,GO:0016567,GO:0031463,GO:0050801,GO:0070294,GO:0070936,GO:0072156	actin binding|cytosol|cytoskeleton|ubiquitin-dependent protein catabolic process|protein ubiquitination|Cul3-RING ubiquitin ligase complex|ion homeostasis|renal sodium ion absorption|protein K48-linked ubiquitination|distal tubule morphogenesis
KLHL38	30.3555	17.2855	43.4255	2.51221	1.32895	0.00142757	0.0119	Up	0.321561	0.185748	0.213675	0.116926	0.113165	0.0660758	GeneID:101107608	kelch like family member 38
KLHL40	14.1676	19.8907	8.44445	0.425188	-1.23383	0.0379185	0.141362	Down	0.058942	0.0823332	0.152749	0.31414	0.224648	0.172591	GeneID:101119589	kelch like family member 40	GO:0005737,GO:0031397,GO:0031398,GO:0031463,GO:0031672,GO:0031674,GO:0032435,GO:0032436,GO:0048741,GO:0098528	cytoplasm|negative regulation of protein ubiquitination|positive regulation of protein ubiquitination|Cul3-RING ubiquitin ligase complex|A band|I band|negative regulation of proteasomal ubiquitin-dependent protein catabolic process|positive regulation of proteasomal ubiquitin-dependent protein catabolic process|skeletal muscle fiber development|skeletal muscle fiber differentiation
KRT8	483.411	255.482	711.339	2.78401	1.47716	1.9081e-20	3.3208e-18	Up	10.3385	11.6202	10.6462	3.22712	3.43564	5.3798	GeneID:101110495	keratin 8	GO:0005198,GO:0005654,GO:0005737,GO:0016363,GO:0045095	structural molecule activity|nucleoplasm|cytoplasm|nuclear matrix|keratin filament
KRT80	17.901	10.1008	25.7012	2.54528	1.34782	0.0107775	0.0568741	Up	0.18526	0.176041	0.307759	0.0870697	0.0619377	0.120549	GeneID:101113319	keratin 80	GO:0005198,GO:0045095	structural molecule activity|keratin filament
L1CAM	47.7218	20.8576	74.5859	3.57525	1.83804	2.5181e-08	9.05184e-07	Up	0.423201	0.344055	0.380159	0.108289	0.0890851	0.132589	GeneID:101110032	L1 cell adhesion molecule			oas04360,oas04514	Axon guidance|Cell adhesion molecules (CAMs)
LAMC2	1597.86	854.37	2341.35	2.74045	1.45441	5.33707e-35	2.53885e-32	Up	17.4858	17.5564	15.6045	7.32684	6.84858	4.88551	GeneID:100216328	laminin subunit gamma 2	GO:0005604,GO:0007155,GO:0008201,GO:0048731,GO:0070831	basement membrane|cell adhesion|heparin binding|system development|basement membrane assembly	oas04151,oas04510,oas04512,oas05145,oas05146,oas05165,oas05200,oas05222	PI3K-Akt signaling pathway|Focal adhesion|ECM-receptor interaction|Toxoplasmosis|Amoebiasis|Human papillomavirus infection|Pathways in cancer|Small cell lung cancer
LAMC3	35.9677	49.5799	22.3554	0.451079	-1.14855	0.00298562	0.0211259	Down	0.117373	0.0749496	0.11699	0.231687	0.315498	0.160387	GeneID:101122429	laminin subunit gamma 3	GO:0000904,GO:0005198,GO:0005576,GO:0005604,GO:0007155,GO:0007601,GO:0014002,GO:0016020,GO:0030198,GO:0031012,GO:0060041	cell morphogenesis involved in differentiation|structural molecule activity|extracellular region|basement membrane|cell adhesion|visual perception|astrocyte development|membrane|extracellular matrix organization|extracellular matrix|retina development in camera-type eye	oas04151,oas04510,oas04512,oas05145,oas05146,oas05165,oas05200,oas05222	PI3K-Akt signaling pathway|Focal adhesion|ECM-receptor interaction|Toxoplasmosis|Amoebiasis|Human papillomavirus infection|Pathways in cancer|Small cell lung cancer
LAPTM4B	550.223	890.995	209.452	0.235082	-2.08876	3.37694e-45	3.7071e-42	Down	2.69127	2.7255	2.88368	11.103	10.1224	15.0779	GeneID:101107107	lysosomal protein transmembrane 4 beta	GO:0005764,GO:0005765,GO:0005768,GO:0005769,GO:0005886,GO:0007032,GO:0016020,GO:0016021,GO:0031902,GO:0032509,GO:0032585,GO:0032911,GO:0042995,GO:0097001,GO:0097213,GO:0097487,GO:1902936,GO:1905166,GO:1905671	lysosome|lysosomal membrane|endosome|early endosome|plasma membrane|endosome organization|membrane|integral component of membrane|late endosome membrane|endosome transport via multivesicular body sorting pathway|multivesicular body membrane|negative regulation of transforming growth factor beta1 production|cell projection|ceramide binding|regulation of lysosomal membrane permeability|multivesicul…	oas04142	Lysosome
LAT	12.0104	18.5814	5.43951	0.292333	-1.77432	0.00823201	0.046197	Down	0.0539027	0.121008	0.0402952	0.159601	0.29735	0.302518	GeneID:101110725	linker for activation of T cells	GO:0000165,GO:0001772,GO:0002250,GO:0002260,GO:0005070,GO:0005088,GO:0005794,GO:0005886,GO:0005911,GO:0006954,GO:0006955,GO:0007229,GO:0007265,GO:0008180,GO:0010467,GO:0016021,GO:0019722,GO:0019901,GO:0035556,GO:0038095,GO:0042110,GO:0042629,GO:0043303,GO:0045121,GO:0045860,GO:0050852,GO:0050863	MAPK cascade|immunological synapse|adaptive immune response|lymphocyte homeostasis|SH3/SH2 adaptor activity|Ras guanyl-nucleotide exchange factor activity|Golgi apparatus|plasma membrane|cell-cell junction|inflammatory response|immune response|integrin-mediated signaling pathway|Ras protein signal transduction|COP9 signalosome|gene expression|integral component of membrane|calcium-mediated signal…	oas04014,oas04015,oas04064,oas04650,oas04658,oas04659,oas04660,oas04664,oas04666,oas05235	Ras signaling pathway|Rap1 signaling pathway|NF-kappa B signaling pathway|Natural killer cell mediated cytotoxicity|Th1 and Th2 cell differentiation|Th17 cell differentiation|T cell receptor signaling pathway|Fc epsilon RI signaling pathway|Fc gamma R-mediated phagocytosis|PD-L1 expression and PD-1 checkpoint pathway in cancer
LBH	1422.67	1953	892.347	0.456912	-1.13001	2.08573e-06	4.83205e-05	Down	8.42024	8.00854	8.80428	15.484	16.3708	24.9182	GeneID:101103634	limb bud and heart development	GO:0005634,GO:0005737,GO:0033147,GO:0045893,GO:0060644,GO:1904674,GO:1904677,GO:2000103,GO:2000737	nucleus|cytoplasm|negative regulation of intracellular estrogen receptor signaling pathway|positive regulation of transcription, DNA-templated|mammary gland epithelial cell differentiation|positive regulation of somatic stem cell population maintenance|positive regulation of somatic stem cell division|positive regulation of mammary stem cell proliferation|negative regulation of stem cell differen…
LGI3	19.9722	8.14773	31.7967	3.90366	1.96483	0.000155289	0.00197124	Up	0.18962	0.220726	0.330753	0.0467875	0.0633954	0.0848278	GeneID:101122581	leucine rich repeat LGI family member 3	GO:0003824,GO:0005576,GO:0006887,GO:0008021,GO:0017157,GO:0030054,GO:0043005	catalytic activity|extracellular region|exocytosis|synaptic vesicle|regulation of exocytosis|cell junction|neuron projection
LOC101102156	1929.45	1200.18	2658.72	2.21533	1.14752	2.37397e-30	8.06642e-28	Up	38.8308	42.3736	50.1517	19.8244	18.8176	22.338	GeneID:101102156	galectin-9	GO:0002376,GO:0005576,GO:0005634,GO:0005737,GO:0030246	immune system process|extracellular region|nucleus|cytoplasm|carbohydrate binding
LOC101102230	12.7076	18.2696	7.14557	0.39059	-1.35627	0.0400749	0.147096	Down	0.0971272	0.193817	0.0484052	0.287585	0.438377	0.173802	GeneID:101102230	platelet glycoprotein 4-like	GO:0005794,GO:0006955,GO:0007155,GO:0007166,GO:0007204,GO:0016020,GO:0016021,GO:0016324,GO:0030299,GO:0031526,GO:0031623,GO:0033993,GO:0034197,GO:0044539,GO:0045121,GO:0050702,GO:0050892,GO:0050909,GO:0070374,GO:0070508,GO:0070542,GO:0070543,GO:0071404,GO:0071726,GO:0097009,GO:1900227,GO:1990000	Golgi apparatus|immune response|cell adhesion|cell surface receptor signaling pathway|positive regulation of cytosolic calcium ion concentration|membrane|integral component of membrane|apical plasma membrane|intestinal cholesterol absorption|brush border membrane|receptor internalization|response to lipid|triglyceride transport|long-chain fatty acid import|membrane raft|interleukin-1 beta secreti…	oas03320,oas04145,oas04152,oas04512,oas04640,oas04920,oas04931,oas04975,oas04979,oas05144	PPAR signaling pathway|Phagosome|AMPK signaling pathway|ECM-receptor interaction|Hematopoietic cell lineage|Adipocytokine signaling pathway|Insulin resistance|Fat digestion and absorption|Cholesterol metabolism|Malaria
LOC101102857	3.10565	5.87005	0.34125	0.0620746	-4.00985	0.0113978	0.0592776	Down	0.0163762	0	0	0.129303	0.0985506	0.063936	GeneID:101102857	elongation factor 1-alpha 1	GO:0003746,GO:0003924,GO:0005525,GO:0005634,GO:0005730,GO:0005737,GO:0005886,GO:0006412,GO:0006414,GO:0071364	translation elongation factor activity|GTPase activity|GTP binding|nucleus|nucleolus|cytoplasm|plasma membrane|translation|translational elongation|cellular response to epidermal growth factor stimulus	oas03013,oas05134	RNA transport|Legionellosis
LOC101103238	27732.2	16662.3	38802	2.32874	1.21955	3.12565e-79	2.23031e-75	Up	631.772	653.324	714.533	290.221	312.267	281.835	GeneID:101103238	C-X-C motif chemokine 6	GO:0005615,GO:0006954,GO:0006955,GO:0008009,GO:0008201,GO:0030593,GO:0030595,GO:0042119,GO:0042742,GO:0061844,GO:0070098,GO:0071222	extracellular space|inflammatory response|immune response|chemokine activity|heparin binding|neutrophil chemotaxis|leukocyte chemotaxis|neutrophil activation|defense response to bacterium|antimicrobial humoral immune response mediated by antimicrobial peptide|chemokine-mediated signaling pathway|cellular response to lipopolysaccharide	oas04060,oas04062,oas04657,oas05133,oas05323	Cytokine-cytokine receptor interaction|Chemokine signaling pathway|IL-17 signaling pathway|Pertussis|Rheumatoid arthritis
LOC101103335	4.54868	1.30232	7.79504	5.98098	2.58038	0.0241994	0.102404	Up	0.0580626	0.086898	0.0771643	0	0.00970599	0.028336	GeneID:101103335	transcription factor CP2-like protein 1	GO:0000122,GO:0000902,GO:0000977,GO:0001227,GO:0001650,GO:0002070,GO:0003700,GO:0005634,GO:0005667,GO:0005737,GO:0005739,GO:0006357,GO:0007028,GO:0007431,GO:0008340,GO:0016020,GO:0043565,GO:0045927	negative regulation of transcription by RNA polymerase II|cell morphogenesis|RNA polymerase II regulatory region sequence-specific DNA binding|DNA-binding transcription repressor activity, RNA polymerase II-specific|fibrillar center|epithelial cell maturation|DNA-binding transcription factor activity|nucleus|transcription factor complex|cytoplasm|mitochondrion|regulation of transcription by RNA p…
LOC101103343	154.551	79.5502	229.551	2.88551	1.52883	2.71498e-16	3.17586e-14	Up	1.16603	1.06119	1.06984	0.452633	0.371896	0.352385	GeneID:101103343	carcinoembryonic antigen-related cell adhesion molecule 1
LOC101103644	632.919	389.623	876.214	2.24896	1.16926	4.01139e-26	1.1009e-23	Up	1.07705	1.26564	1.21082	0.580447	0.559473	0.487987	GeneID:101103644	mucin-16
LOC101104012	42.4039	26.7302	58.0777	2.17175	1.11886	0.00151572	0.012489	Up	1.09939	0.911527	0.632791	0.320937	0.450389	0.483635	GeneID:101104012	centrin-4	GO:0000281,GO:0005509,GO:0005634,GO:0005813,GO:0005814,GO:0007099,GO:0008017,GO:0010824,GO:0019722,GO:0031683,GO:0032465,GO:0032795,GO:0036064	mitotic cytokinesis|calcium ion binding|nucleus|centrosome|centriole|centriole replication|microtubule binding|regulation of centrosome duplication|calcium-mediated signaling|G-protein beta/gamma-subunit complex binding|regulation of cytokinesis|heterotrimeric G-protein binding|ciliary basal body
LOC101104028	376.977	224.657	529.297	2.35603	1.23636	3.8502e-22	8.20093e-20	Up	1.55182	1.55127	1.48512	0.714943	0.711775	0.580571	GeneID:101104028	limbic system associated membrane protein	GO:0005576,GO:0005829,GO:0005886,GO:0007155,GO:0007399,GO:0031225,GO:0035641	extracellular region|cytosol|plasma membrane|cell adhesion|nervous system development|anchored component of membrane|locomotory exploration behavior
LOC101104568	61.9962	25.774	98.2185	3.8124	1.9307	8.54653e-09	3.41646e-07	Up	0.94396	1.3676	1.43065	0.382875	0.466904	0.164077	GeneID:101104568	apolipoprotein L6	GO:0005576,GO:0005737,GO:0006869,GO:0008289,GO:0042157	extracellular region|cytoplasm|lipid transport|lipid binding|lipoprotein metabolic process
LOC101104661	1715.33	1053.17	2377.49	2.25744	1.17469	3.18713e-05	0.00050896	Up	65.5665	60.5924	65.1892	22.5239	24.6163	39.9877	GeneID:101104661	growth-regulated protein homolog gamma	GO:0005615,GO:0006954,GO:0006955,GO:0008009,GO:0008083	extracellular space|inflammatory response|immune response|chemokine activity|growth factor activity	oas04060,oas04062,oas04621,oas04657,oas04668,oas05132,oas05134,oas05167	Cytokine-cytokine receptor interaction|Chemokine signaling pathway|NOD-like receptor signaling pathway|IL-17 signaling pathway|TNF signaling pathway|Salmonella infection|Legionellosis|Kaposi sarcoma-associated herpesvirus infection
LOC101104669	1.51892	0	3.03785	16.8981	4.07879	0.0396793	0.145982	Up	0.00684932	0.0205017	0.0341349	0	0	0	GeneID:101104669	acyl-coenzyme A thioesterase 1-like	GO:0000038,GO:0001676,GO:0005829,GO:0006631,GO:0006637,GO:0016290,GO:0047617,GO:0052689,GO:0102991	very long-chain fatty acid metabolic process|long-chain fatty acid metabolic process|cytosol|fatty acid metabolic process|acyl-CoA metabolic process|palmitoyl-CoA hydrolase activity|acyl-CoA hydrolase activity|carboxylic ester hydrolase activity|myristoyl-CoA hydrolase activity	oas00062,oas01040	Fatty acid elongation|Biosynthesis of unsaturated fatty acids
LOC101104705	431.356	263.63	599.081	2.27245	1.18425	0.0158777	0.0752045	Up	8.20499	8.44237	7.1425	4.32876	4.99454	1.50159	GeneID:101104705	plasminogen activator inhibitor 2-like	GO:0004867,GO:0005576,GO:0005615,GO:0005737,GO:0005886,GO:0010951,GO:0035722,GO:0042060,GO:0042730,GO:0043066	serine-type endopeptidase inhibitor activity|extracellular region|extracellular space|cytoplasm|plasma membrane|negative regulation of endopeptidase activity|interleukin-12-mediated signaling pathway|wound healing|fibrinolysis|negative regulation of apoptotic process	oas04610	Complement and coagulation cascades
LOC101104790	18.8393	7.18008	30.4986	4.25011	2.0875	0.000258446	0.00300839	Up	0.794843	0.484645	0.704222	0.0871653	0.310028	0.0862008	GeneID:101104790	histone H2A type 1-B/E	GO:0000786,GO:0000790,GO:0003677,GO:0005634,GO:0006325,GO:0008285,GO:0046982,GO:0070062	nucleosome|nuclear chromatin|DNA binding|nucleus|chromatin organization|negative regulation of cell proliferation|protein heterodimerization activity|extracellular exosome	oas04217,oas05034,oas05322	Necroptosis|Alcoholism|Systemic lupus erythematosus
LOC101105036	36.4339	11.7458	61.122	5.20431	2.37971	2.62674e-08	9.39502e-07	Up	3.05038	2.82613	1.95456	0.344074	0.87414	0.340266	GeneID:101105036	histone H2A type 1	GO:0000786,GO:0000790,GO:0003677,GO:0006325,GO:0046982	nucleosome|nuclear chromatin|DNA binding|chromatin organization|protein heterodimerization activity	oas04217,oas05034,oas05322	Necroptosis|Alcoholism|Systemic lupus erythematosus
LOC101106064	3.72117	0.97876	6.46357	6.60231	2.72297	0.0386079	0.143212	Up	0.0757927	0.0252074	0.0188864	0	0.0126698	0.0061648	GeneID:101106064	antigen WC1.1-like	GO:0005044,GO:0005576,GO:0009897	scavenger receptor activity|extracellular region|external side of plasma membrane
LOC101106199	15.6679	6.19164	25.1442	4.05817	2.02083	0.000698422	0.00665366	Up	1.12065	1.47593	0.714875	0.176968	0.269759	0.393772	GeneID:101106199	hemoglobin fetal subunit beta	GO:0005344,GO:0005833,GO:0019825,GO:0020037,GO:0046872	oxygen carrier activity|hemoglobin complex|oxygen binding|heme binding|metal ion binding	oas05143,oas05144	African trypanosomiasis|Malaria
LOC101106541	204.928	65.8056	344.049	5.22694	2.38597	4.5053e-26	1.21312e-23	Up	3.65098	3.63189	3.75856	0.527067	0.513756	1.12757	GeneID:101106541	uncharacterized LOC101106541	GO:0004859,GO:0005576	phospholipase inhibitor activity|extracellular region
LOC101106662	99.6451	5.53429	193.756	34.9955	5.1291	3.796e-09	1.61228e-07	Up	8.36506	12.0446	8.13807	0.346063	0	0.488906	GeneID:101106662	NADH dehydrogenase [ubiquinone] 1 beta subcomplex subunit 3	GO:0005747,GO:0016021,GO:0022900,GO:0032981	mitochondrial respiratory chain complex I|integral component of membrane|electron transport chain|mitochondrial respiratory chain complex I assembly	oas00190,oas04714,oas04723,oas04932,oas05010,oas05012,oas05016	Oxidative phosphorylation|Thermogenesis|Retrograde endocannabinoid signaling|Non-alcoholic fatty liver disease (NAFLD)|Alzheimer disease|Parkinson disease|Huntington disease
LOC101106722	3.72062	0.978043	6.4632	6.60343	2.72321	0.0319428	0.124858	Up	0.0691097	0.114924	0.0344421	0.0113682	0.0115527	0.0112424	GeneID:101106722	high mobility group protein B2	GO:0000400,GO:0000790,GO:0000793,GO:0001158,GO:0002437,GO:0003677,GO:0003690,GO:0003697,GO:0005615,GO:0005623,GO:0005634,GO:0005737,GO:0006265,GO:0006310,GO:0006334,GO:0006338,GO:0006357,GO:0006935,GO:0007283,GO:0007289,GO:0008134,GO:0008144,GO:0008301,GO:0008584,GO:0010628,GO:0010629,GO:0019904,GO:0032392,GO:0032496,GO:0042493,GO:0043388,GO:0044378,GO:0045087,GO:0045089,GO:0045944,GO:0048471,GO:…	four-way junction DNA binding|nuclear chromatin|condensed chromosome|enhancer sequence-specific DNA binding|inflammatory response to antigenic stimulus|DNA binding|double-stranded DNA binding|single-stranded DNA binding|extracellular space|cell|nucleus|cytoplasm|DNA topological change|DNA recombination|nucleosome assembly|chromatin remodeling|regulation of transcription by RNA polymerase II|chemo…
LOC101108627	14.3206	21.8434	6.79793	0.310803	-1.68593	0.00423397	0.0277205	Down	0.107343	0.107102	0.0534964	0.357563	0.269159	0.261931	GeneID:101108627	core histone macro-H2A.2	GO:0000122,GO:0000784,GO:0000786,GO:0000790,GO:0000977,GO:0001740,GO:0003677,GO:0005654,GO:0006325,GO:0006334,GO:0007420,GO:0007549,GO:0031490,GO:0044212,GO:0045618,GO:0045814,GO:0046982,GO:0070062,GO:0071169,GO:1901837	negative regulation of transcription by RNA polymerase II|nuclear chromosome, telomeric region|nucleosome|nuclear chromatin|RNA polymerase II regulatory region sequence-specific DNA binding|Barr body|DNA binding|nucleoplasm|chromatin organization|nucleosome assembly|brain development|dosage compensation|chromatin DNA binding|transcription regulatory region DNA binding|positive regulation of kerat…	oas04217,oas05034,oas05322	Necroptosis|Alcoholism|Systemic lupus erythematosus
LOC101108756	7.2447	2.60644	11.883	4.55588	2.18773	0.0106947	0.0565904	Up	0.0730997	0.116696	0.0655751	0.0144295	0.0146636	0.0285396	GeneID:101108756	feline leukemia virus subgroup C receptor-related protein 2	GO:0005886,GO:0015232,GO:0016021,GO:0020037,GO:0097037	plasma membrane|heme transporter activity|integral component of membrane|heme binding|heme export
LOC101108797	6.39336	1.30429	11.4824	8.80991	3.13913	0.00431014	0.0281213	Up	0.365001	0.36418	0.818573	0.180123	0	0	GeneID:101108797	hemoglobin subunit alpha-1/2	GO:0005344,GO:0005506,GO:0005833,GO:0019825,GO:0020037	oxygen carrier activity|iron ion binding|hemoglobin complex|oxygen binding|heme binding	oas05143,oas05144	African trypanosomiasis|Malaria
LOC101108840	4.0445	1.30412	6.78489	5.20193	2.37905	0.0408241	0.148889	Up	0.0705708	0.0281648	0.0422044	0.0139303	0.00707815	0.00688807	GeneID:101108840	protein FAM83A	GO:0005737,GO:0007173,GO:0008283,GO:0019901,GO:0036312	cytoplasm|epidermal growth factor receptor signaling pathway|cell proliferation|protein kinase binding|phosphatidylinositol 3-kinase regulatory subunit binding
LOC101109397	78.6626	51.8214	105.504	2.03538	1.0253	8.91237e-05	0.00124207	Up	3.37154	3.75587	3.03427	1.29228	1.67439	2.17256	GeneID:101109397	histone H1.3	GO:0000122,GO:0000786,GO:0003690,GO:0005634,GO:0005719,GO:0006334,GO:0006355,GO:0016584,GO:0030261,GO:0031492,GO:0031936,GO:0035327,GO:0045910,GO:0080182,GO:0098532	negative regulation of transcription by RNA polymerase II|nucleosome|double-stranded DNA binding|nucleus|nuclear euchromatin|nucleosome assembly|regulation of transcription, DNA-templated|nucleosome positioning|chromosome condensation|nucleosomal DNA binding|negative regulation of chromatin silencing|transcriptionally active chromatin|negative regulation of DNA recombination|histone H3-K4 trimeth…
LOC101109919	26.5733	12.7137	40.433	3.17861	1.6684	0.000180346	0.00222448	Up	3.07471	3.27232	1.7707	0.809241	0.890902	0.933668	GeneID:101109919	histone H4	GO:0000788,GO:0003677,GO:0006335,GO:0006336,GO:0006352,GO:0019904,GO:0045653,GO:0046982,GO:0051290	nuclear nucleosome|DNA binding|DNA replication-dependent nucleosome assembly|DNA replication-independent nucleosome assembly|DNA-templated transcription, initiation|protein domain specific binding|negative regulation of megakaryocyte differentiation|protein heterodimerization activity|protein heterotetramerization	oas05034,oas05203,oas05322	Alcoholism|Viral carcinogenesis|Systemic lupus erythematosus
LOC101110711	9.90764	4.88788	14.9274	3.0527	1.61009	0.0221157	0.0959602	Up	0.530236	0.961896	0.624598	0.285452	0.145041	0.282293	GeneID:101110711	histone H2B type 1	GO:0000786,GO:0003677,GO:0005654,GO:0006334,GO:0046982	nucleosome|DNA binding|nucleoplasm|nucleosome assembly|protein heterodimerization activity	oas05034,oas05203,oas05322	Alcoholism|Viral carcinogenesis|Systemic lupus erythematosus
LOC101111337	6.58432	10.1108	3.05784	0.302124	-1.72679	0.0496422	0.170927	Down	0.0169931	0.00678193	0.00677505	0.0469607	0.0374963	0.0199033	GeneID:101111337	SLAM family member 9-like	GO:0002232,GO:0002336,GO:0005623,GO:0010760,GO:0016021,GO:0033860,GO:0035690,GO:0038023,GO:0042742,GO:0042802,GO:0043549,GO:0045577,GO:0060266,GO:0090027,GO:0090383,GO:1902623,GO:2000509	leukocyte chemotaxis involved in inflammatory response|B-1 B cell lineage commitment|cell|negative regulation of macrophage chemotaxis|integral component of membrane|regulation of NAD(P)H oxidase activity|cellular response to drug|signaling receptor activity|defense response to bacterium|identical protein binding|regulation of kinase activity|regulation of B cell differentiation|negative regulati…
LOC101111669	263.322	123.514	403.13	3.26312	1.70625	4.68966e-20	7.78211e-18	Up	7.27238	5.36768	5.03544	1.86795	1.4648	2.24001	GeneID:101111669	histone H2A type 1-C	GO:0000786,GO:0000790,GO:0003677,GO:0005634,GO:0005654,GO:0006325,GO:0008285,GO:0046982,GO:0070062	nucleosome|nuclear chromatin|DNA binding|nucleus|nucleoplasm|chromatin organization|negative regulation of cell proliferation|protein heterodimerization activity|extracellular exosome	oas04217,oas05034,oas05322	Necroptosis|Alcoholism|Systemic lupus erythematosus
LOC101111915	653.74	416.021	891.459	2.14276	1.09947	3.29502e-26	9.40465e-24	Up	20.7271	19.6612	19.1886	8.87294	10.4286	9.35088	GeneID:101111915	histone H2B type 1	GO:0000786,GO:0003677,GO:0005654,GO:0006334,GO:0046982	nucleosome|DNA binding|nucleoplasm|nucleosome assembly|protein heterodimerization activity	oas05034,oas05203,oas05322	Alcoholism|Viral carcinogenesis|Systemic lupus erythematosus
LOC101112335	30.4923	41.7138	19.2709	0.462372	-1.11287	0.0105289	0.0560039	Down	0.0796503	0.0908242	0.15311	0.145995	0.239664	0.333183	GeneID:101112335	membrane primary amine oxidase	GO:0005507,GO:0005769,GO:0005783,GO:0005794,GO:0005886,GO:0007155,GO:0008131,GO:0009308,GO:0009986,GO:0016021,GO:0046677,GO:0048038,GO:0052593,GO:0052594,GO:0052595,GO:0052596,GO:1902283	copper ion binding|early endosome|endoplasmic reticulum|Golgi apparatus|plasma membrane|cell adhesion|primary amine oxidase activity|amine metabolic process|cell surface|integral component of membrane|response to antibiotic|quinone binding|tryptamine:oxygen oxidoreductase (deaminating) activity|aminoacetone:oxygen oxidoreductase(deaminating) activity|aliphatic-amine oxidase activity|phenethylamin…	oas00260,oas00350,oas00360,oas00410	Glycine, serine and threonine metabolism|Tyrosine metabolism|Phenylalanine metabolism|beta-Alanine metabolism
LOC101112356	1484.7	817.894	2151.51	2.63039	1.39528	1.97046e-49	3.51506e-46	Up	16.8003	14.636	13.8512	5.88009	5.67421	6.17803	GeneID:101112356	histone H1t	GO:0000786,GO:0000794,GO:0003690,GO:0005634,GO:0006334,GO:0006355,GO:0007275,GO:0007283,GO:0007339,GO:0016584,GO:0030154,GO:0030261,GO:0030317,GO:0031492,GO:0031936,GO:0045910	nucleosome|condensed nuclear chromosome|double-stranded DNA binding|nucleus|nucleosome assembly|regulation of transcription, DNA-templated|multicellular organism development|spermatogenesis|binding of sperm to zona pellucida|nucleosome positioning|cell differentiation|chromosome condensation|flagellated sperm motility|nucleosomal DNA binding|negative regulation of chromatin silencing|negative reg…
LOC101112563	84.9215	122.303	47.5396	0.388495	-1.36403	6.9352e-07	1.82269e-05	Down	0.553096	0.447191	0.332676	1.05413	1.54947	0.940084	GeneID:101112563	intercellular adhesion molecule 1-like	GO:0005178,GO:0005887,GO:0007155,GO:0098609	integrin binding|integral component of plasma membrane|cell adhesion|cell-cell adhesion	oas04064,oas04514,oas04650,oas04668,oas04670,oas04933,oas05143,oas05144,oas05150,oas05164,oas05166,oas05167,oas05169,oas05323,oas05416,oas05418	NF-kappa B signaling pathway|Cell adhesion molecules (CAMs)|Natural killer cell mediated cytotoxicity|TNF signaling pathway|Leukocyte transendothelial migration|AGE-RAGE signaling pathway in diabetic complications|African trypanosomiasis|Malaria|Staphylococcus aureus infection|Influenza A|Human T-cell leukemia virus 1 infection|Kaposi sarcoma-associated herpesvirus infection|Epstein-Barr virus in…
LOC101113041	35.4439	7.82004	63.0677	8.06394	3.01149	0.0346177	0.132653	Up	0.187671	2.82576	0.136043	0.235743	0.0342239	0.133219	GeneID:101113041	acyl-coenzyme A thioesterase 9, mitochondrial	GO:0005739,GO:0006637,GO:0047617,GO:0052689	mitochondrion|acyl-CoA metabolic process|acyl-CoA hydrolase activity|carboxylic ester hydrolase activity
LOC101113636	7.55292	12.396	2.70982	0.218722	-2.19283	0.011047	0.0578752	Down	0.00900822	0.0359518	0.0269365	0.133363	0.144562	0.0615474	GeneID:101113636	vascular cell adhesion protein 1	GO:0005178,GO:0005887,GO:0007155,GO:0098609	integrin binding|integral component of plasma membrane|cell adhesion|cell-cell adhesion	oas04064,oas04514,oas04668,oas04670,oas04933,oas05143,oas05144,oas05418	NF-kappa B signaling pathway|Cell adhesion molecules (CAMs)|TNF signaling pathway|Leukocyte transendothelial migration|AGE-RAGE signaling pathway in diabetic complications|African trypanosomiasis|Malaria|Fluid shear stress and atherosclerosis
LOC101115542	27.4857	14.9987	39.9728	2.66569	1.41451	0.000714447	0.00677017	Up	0.895704	0.995825	1.12235	0.505163	0.359351	0.299744	GeneID:101115542	targeting protein for Xklp2-like	GO:0000922,GO:0005634,GO:0005654,GO:0005737,GO:0005815,GO:0005818,GO:0005819,GO:0005874,GO:0006915,GO:0015630,GO:0019901,GO:0032147,GO:0043203,GO:0045171,GO:0051225,GO:0051301,GO:0060236,GO:0061676,GO:0072686,GO:0090307	spindle pole|nucleus|nucleoplasm|cytoplasm|microtubule organizing center|aster|spindle|microtubule|apoptotic process|microtubule cytoskeleton|protein kinase binding|activation of protein kinase activity|axon hillock|intercellular bridge|spindle assembly|cell division|regulation of mitotic spindle organization|importin-alpha family protein binding|mitotic spindle|mitotic spindle assembly
LOC101116002	106.903	56.7439	157.062	2.76897	1.46935	5.73389e-10	2.85116e-08	Up	1.21402	1.27504	1.73776	0.486489	0.650022	0.436559	GeneID:101116002	calcium-activated chloride channel regulator 1-like	GO:0005229,GO:0005887,GO:0006816,GO:0008237,GO:0016324,GO:0046872	intracellular calcium activated chloride channel activity|integral component of plasma membrane|calcium ion transport|metallopeptidase activity|apical plasma membrane|metal ion binding	oas04924,oas04972	Renin secretion|Pancreatic secretion
LOC101116442	934.755	512.735	1356.77	2.64621	1.40393	1.31824e-35	6.96761e-33	Up	9.26117	11.3001	12.0531	4.21189	3.86284	4.60331	GeneID:101116442	desmocollin-3	GO:0005509,GO:0005886,GO:0007156,GO:0016021,GO:0030057	calcium ion binding|plasma membrane|homophilic cell adhesion via plasma membrane adhesion molecules|integral component of membrane|desmosome
LOC101116754	11.305	1.62678	20.9832	12.8836	3.68746	3.48199e-05	0.000548165	Up	0.0830626	0.188354	0.195689	0.00745278	0	0.0294812	GeneID:101116754	vomeromodulin-like	GO:0005576,GO:0007608,GO:0008289	extracellular region|sensory perception of smell|lipid binding
LOC101117316	19.1856	6.1868	32.1844	5.19932	2.37832	2.5584e-05	0.000422581	Up	0.14292	0.133399	0.160835	0.0182011	0.0138723	0.053999	GeneID:101117316	antigen WC1.1-like	GO:0005044,GO:0005576,GO:0009897	scavenger receptor activity|extracellular region|external side of plasma membrane	oas04970	Salivary secretion
LOC101117577	590.724	791.676	389.772	0.492368	-1.02219	7.88573e-19	1.22323e-16	Down	3.3679	2.803	3.25866	6.77776	7.12666	5.82884	GeneID:101117577	ATP-binding cassette sub-family C member 9			oas02010	ABC transporters
LOC101117703	39.9652	15.3276	64.6027	4.21673	2.07612	1.09996e-06	2.74434e-05	Up	1.18947	2.96698	3.39868	0.665249	0.71581	0.464392	GeneID:101117703	interferon alpha-inducible protein 27, mitochondrial	GO:0001836,GO:0005739,GO:0005743,GO:0005886,GO:0006915,GO:0006955,GO:0016021,GO:0031966,GO:0042058,GO:0043066,GO:0043154,GO:0045087,GO:0051607,GO:0051902,GO:0060337,GO:0072593,GO:0097190,GO:0097193,GO:0098586,GO:2001240	release of cytochrome c from mitochondria|mitochondrion|mitochondrial inner membrane|plasma membrane|apoptotic process|immune response|integral component of membrane|mitochondrial membrane|regulation of epidermal growth factor receptor signaling pathway|negative regulation of apoptotic process|negative regulation of cysteine-type endopeptidase activity involved in apoptotic process|innate immune …
LOC101119226	27.7011	14.3395	41.0626	2.8624	1.51722	0.000311541	0.00350079	Up	0.253121	0.270591	0.204239	0.0713782	0.0785809	0.111765	GeneID:101119226	ly-6/neurotoxin-like protein 1	GO:0005783,GO:0005886,GO:0007271,GO:0008200,GO:0030425,GO:0030548,GO:0030550,GO:0031225,GO:0033130,GO:0099601	endoplasmic reticulum|plasma membrane|synaptic transmission, cholinergic|ion channel inhibitor activity|dendrite|acetylcholine receptor regulator activity|acetylcholine receptor inhibitor activity|anchored component of membrane|acetylcholine receptor binding|regulation of neurotransmitter receptor activity
LOC101119517	97.2526	41.411	153.094	3.69789	1.8867	2.12756e-15	2.24907e-13	Up	1.39856	1.24456	1.62005	0.391717	0.445462	0.350489	GeneID:101119517	guanylate-binding protein 1-like	GO:0000139,GO:0003924,GO:0005525,GO:0005576,GO:0005886,GO:0042742,GO:0051607	Golgi membrane|GTPase activity|GTP binding|extracellular region|plasma membrane|defense response to bacterium|defense response to virus	oas04621	NOD-like receptor signaling pathway
LOC101119832	4.70554	0.979656	8.43142	8.62348	3.10827	0.012398	0.0628979	Up	0.344501	0.147311	0.735809	0.0485733	0.0987229	0	GeneID:101119832	eotaxin	GO:0001938,GO:0002548,GO:0005615,GO:0006954,GO:0007010,GO:0007186,GO:0008009,GO:0008360,GO:0030335,GO:0030593,GO:0030838,GO:0031728,GO:0043547,GO:0045766,GO:0046983,GO:0048020,GO:0048245,GO:0048247,GO:0060444,GO:0060763,GO:0070098,GO:0070374,GO:0071346,GO:0071347,GO:0071356	positive regulation of endothelial cell proliferation|monocyte chemotaxis|extracellular space|inflammatory response|cytoskeleton organization|G protein-coupled receptor signaling pathway|chemokine activity|regulation of cell shape|positive regulation of cell migration|neutrophil chemotaxis|positive regulation of actin filament polymerization|CCR3 chemokine receptor binding|positive regulation of …	oas04060,oas04062,oas04657,oas05310	Cytokine-cytokine receptor interaction|Chemokine signaling pathway|IL-17 signaling pathway|Asthma
LOC101120455	277.766	177.954	377.579	2.12166	1.08519	3.87991e-12	2.83949e-10	Up	9.12659	9.00682	9.5182	3.75525	4.16537	5.48559	GeneID:101120455	histone H2B type 2-F	GO:0000786,GO:0003677,GO:0005634,GO:0005654,GO:0005829,GO:0006334,GO:0046982,GO:0070062	nucleosome|DNA binding|nucleus|nucleoplasm|cytosol|nucleosome assembly|protein heterodimerization activity|extracellular exosome	oas05034,oas05203,oas05322	Alcoholism|Viral carcinogenesis|Systemic lupus erythematosus
LOC101120749	18.2842	26.759	9.80933	0.366905	-1.44652	0.0181209	0.0825418	Down	0.031003	0.0397713	0.0573891	0.161738	0.168804	0.0302605	GeneID:101120749	adhesion G-protein coupled receptor V1	GO:0004930,GO:0005509,GO:0005737,GO:0005886,GO:0007166,GO:0007186,GO:0007399,GO:0007601,GO:0007605,GO:0009986,GO:0016020,GO:0016021,GO:0032420,GO:0043235,GO:0045202,GO:0045494,GO:0048496,GO:0050877,GO:0050953,GO:0070062,GO:0098609	G protein-coupled receptor activity|calcium ion binding|cytoplasm|plasma membrane|cell surface receptor signaling pathway|G protein-coupled receptor signaling pathway|nervous system development|visual perception|sensory perception of sound|cell surface|membrane|integral component of membrane|stereocilium|receptor complex|synapse|photoreceptor cell maintenance|maintenance of animal organ identity|…
LOC101120961	18.9224	12.0576	25.7872	2.13779	1.09612	0.0252963	0.105618	Up	0.724565	0.722935	0.58846	0.291347	0.269159	0.419089	GeneID:101120961	uncharacterized LOC101120961	GO:0000228,GO:0000786,GO:0000788,GO:0005634,GO:0005654,GO:0006334,GO:0006335,GO:0031492,GO:0032991,GO:0046982,GO:0051290,GO:0060968	nuclear chromosome|nucleosome|nuclear nucleosome|nucleus|nucleoplasm|nucleosome assembly|DNA replication-dependent nucleosome assembly|nucleosomal DNA binding|protein-containing complex|protein heterodimerization activity|protein heterotetramerization|regulation of gene silencing	oas05034,oas05203,oas05322	Alcoholism|Viral carcinogenesis|Systemic lupus erythematosus
LOC101121216	6997.93	4064.91	9930.96	2.44309	1.28871	5.12463e-06	0.000105792	Up	522.362	430.916	379.772	216.553	224.322	122.553	GeneID:101121216	serum amyloid A protein-like	GO:0005615,GO:0006953,GO:0034364,GO:0042056,GO:0060326	extracellular space|acute-phase response|high-density lipoprotein particle|chemoattractant activity|cell chemotaxis
LOC101121595	5.55358	1.95375	9.1534	4.68187	2.22709	0.0253739	0.105849	Up	0.0386096	0.0385228	0.0384837	0.0127022	0	0.0125616	GeneID:101121595	cytosolic carboxypeptidase 3	GO:0004181,GO:0005829,GO:0008270,GO:0035610	metallocarboxypeptidase activity|cytosol|zinc ion binding|protein side chain deglutamylation
LOC101122496	43.2775	14.9942	71.5607	4.77178	2.25453	4.65685e-09	1.94322e-07	Up	0.391359	0.395902	0.357576	0.0321884	0.103584	0.111413	GeneID:101122496	multidrug resistance-associated protein 1-like			oas02010	ABC transporters
LOC101123158	29.4263	12.0628	46.7898	3.87874	1.95559	6.65461e-06	0.000132181	Up	1.03219	1.87249	1.40294	0.463066	0.345091	0.335824	GeneID:101123158	histone H1.5	GO:0000122,GO:0000786,GO:0003677,GO:0003690,GO:0005634,GO:0005720,GO:0006334,GO:0006355,GO:0007517,GO:0016584,GO:0030261,GO:0031492,GO:0031936,GO:0042826,GO:0045910,GO:0051574,GO:0071169	negative regulation of transcription by RNA polymerase II|nucleosome|DNA binding|double-stranded DNA binding|nucleus|nuclear heterochromatin|nucleosome assembly|regulation of transcription, DNA-templated|muscle organ development|nucleosome positioning|chromosome condensation|nucleosomal DNA binding|negative regulation of chromatin silencing|histone deacetylase binding|negative regulation of DNA r…
LOC101123419	5.5555	10.4286	0.682375	0.065102	-3.94115	0.00254483	0.0187977	Down	0	0.0107347	0	0.0690219	0.0377686	0.0630075	GeneID:101123419	complement C4-A			oas04610,oas05133,oas05150,oas05322	Complement and coagulation cascades|Pertussis|Staphylococcus aureus infection|Systemic lupus erythematosus
LOC101123672	136.478	182.493	90.4642	0.495744	-1.01233	8.99968e-05	0.00124969	Down	0.397647	0.378511	0.441908	0.500734	0.834344	1.19114	GeneID:101123672	complement C4			oas04610,oas05133,oas05150,oas05322	Complement and coagulation cascades|Pertussis|Staphylococcus aureus infection|Systemic lupus erythematosus
LOC105602104	17.1042	10.7635	23.4449	2.17739	1.1226	0.0362251	0.136632	Up	0.853051	0.916604	0.49054	0.420969	0.427799	0.224167	GeneID:105602104	lysine-specific demethylase 2A-like	GO:0000981,GO:0003677,GO:0005654,GO:0006303,GO:0008270,GO:0032452,GO:0051864,GO:0070544	DNA-binding transcription factor activity, RNA polymerase II-specific|DNA binding|nucleoplasm|double-strand break repair via nonhomologous end joining|zinc ion binding|histone demethylase activity|histone demethylase activity (H3-K36 specific)|histone H3-K36 demethylation
LOC105603225	7.10827	0.653583	13.563	20.7912	4.3779	0.000440671	0.00459037	Up	0.608663	0.417515	0.492926	0	0.0763101	0	GeneID:105603225	interferon alpha-inducible protein 27-like protein 2	GO:0001836,GO:0005739,GO:0005743,GO:0005886,GO:0006915,GO:0006955,GO:0016021,GO:0031966,GO:0042058,GO:0043066,GO:0043154,GO:0045087,GO:0051607,GO:0051902,GO:0060337,GO:0072593,GO:0097190,GO:0097193,GO:0098586,GO:2001240	release of cytochrome c from mitochondria|mitochondrion|mitochondrial inner membrane|plasma membrane|apoptotic process|immune response|integral component of membrane|mitochondrial membrane|regulation of epidermal growth factor receptor signaling pathway|negative regulation of apoptotic process|negative regulation of cysteine-type endopeptidase activity involved in apoptotic process|innate immune …
LOC105603814	109.284	45.0002	173.567	3.85744	1.94764	3.62545e-18	5.17387e-16	Up	1.70822	1.68445	1.71261	0.512692	0.490952	0.360763	GeneID:105603814	histone H3.1	GO:0000786,GO:0005634,GO:0005654,GO:0006334,GO:0031492,GO:0046982	nucleosome|nucleus|nucleoplasm|nucleosome assembly|nucleosomal DNA binding|protein heterodimerization activity	oas05034,oas05202,oas05322	Alcoholism|Transcriptional misregulation in cancer|Systemic lupus erythematosus
LOC105604171	8256.76	4727.95	11785.6	2.49275	1.31774	1.1966e-05	0.000219213	Up	567.765	517.783	469.137	258.815	257.934	127.232	GeneID:105604171	serum amyloid A protein-like	GO:0005615,GO:0006953,GO:0034364,GO:0042056,GO:0060326	extracellular space|acute-phase response|high-density lipoprotein particle|chemoattractant activity|cell chemotaxis
LOC105604880	13.5659	8.1488	18.9829	2.32935	1.21993	0.0353995	0.134573	Up	0.403405	0.244999	0.332161	0.155798	0.123142	0.154074	GeneID:105604880	uncharacterized LOC105604880
LOC105608705	70.3901	20.2166	120.564	5.96321	2.57609	0.00220274	0.0167834	Up	5.49778	2.61573	0.887939	0.879239	0.38293	0.298118	GeneID:105608705	ER membrane protein complex subunit 2	GO:0005634,GO:0005737,GO:0005783,GO:0034975,GO:0072546	nucleus|cytoplasm|endoplasmic reticulum|protein folding in endoplasmic reticulum|ER membrane protein complex
LOC106991790	16.1141	6.84827	25.38	3.70791	1.89061	0.00108612	0.00949753	Up	0.474783	0.375025	0.630979	0.214774	0.11905	0.0772354	GeneID:106991790	uncharacterized LOC106991790	GO:0000786,GO:0005634,GO:0005654,GO:0006334,GO:0031492,GO:0046982	nucleosome|nucleus|nucleoplasm|nucleosome assembly|nucleosomal DNA binding|protein heterodimerization activity	oas05034,oas05202,oas05322	Alcoholism|Transcriptional misregulation in cancer|Systemic lupus erythematosus
LOC114108618	6.88344	1.9568	11.8101	6.04114	2.59482	0.00982622	0.0531778	Up	0.0685766	0.444745	0.683529	0.0338416	0.103172	0.0669343	GeneID:114108618	interferon alpha-inducible protein 27-like protein 1	GO:0001836,GO:0005739,GO:0005743,GO:0006915,GO:0016021,GO:0042058,GO:0043066,GO:0043154,GO:0045087,GO:0051607,GO:0051902,GO:0072593,GO:0097190,GO:0097193,GO:0098586,GO:2001240	release of cytochrome c from mitochondria|mitochondrion|mitochondrial inner membrane|apoptotic process|integral component of membrane|regulation of epidermal growth factor receptor signaling pathway|negative regulation of apoptotic process|negative regulation of cysteine-type endopeptidase activity involved in apoptotic process|innate immune response|defense response to virus|negative regulation …
LOC114108662	300.302	554.884	45.7208	0.082398	-3.60125	0.0122655	0.0623807	Down	2.79556	2.59468	3.36966	2.56665	3.84723	101.974	GeneID:114108662	60S ribosomal protein L34	GO:0000184,GO:0003723,GO:0003735,GO:0005783,GO:0005829,GO:0006412,GO:0006413,GO:0006614,GO:0022625,GO:0045296,GO:0070062	nuclear-transcribed mRNA catabolic process, nonsense-mediated decay|RNA binding|structural constituent of ribosome|endoplasmic reticulum|cytosol|translation|translational initiation|SRP-dependent cotranslational protein targeting to membrane|cytosolic large ribosomal subunit|cadherin binding|extracellular exosome	oas03010	Ribosome
LOC114108665	458.977	182.81	735.145	4.02082	2.00749	1.56056e-33	6.39136e-31	Up	20.7946	17.3504	18.11	3.77123	4.09312	6.52028	GeneID:114108665	growth-regulated alpha protein-like	GO:0005615,GO:0006954,GO:0006955,GO:0008009,GO:0008083	extracellular space|inflammatory response|immune response|chemokine activity|growth factor activity	oas04060,oas04062,oas04621,oas04657,oas04668,oas05132,oas05134,oas05167	Cytokine-cytokine receptor interaction|Chemokine signaling pathway|NOD-like receptor signaling pathway|IL-17 signaling pathway|TNF signaling pathway|Salmonella infection|Legionellosis|Kaposi sarcoma-associated herpesvirus infection
LOC114108759	8.74854	1.6318	15.8653	9.73635	3.28338	0.000503178	0.00510366	Up	0.321927	0.42827	0.926976	0.105911	0.0717528	0	GeneID:114108759	interferon alpha-inducible protein 27-like protein 1	GO:0001836,GO:0005739,GO:0005743,GO:0006915,GO:0016021,GO:0042058,GO:0043066,GO:0043154,GO:0045087,GO:0051607,GO:0051902,GO:0072593,GO:0097190,GO:0097193,GO:0098586,GO:2001240	release of cytochrome c from mitochondria|mitochondrion|mitochondrial inner membrane|apoptotic process|integral component of membrane|regulation of epidermal growth factor receptor signaling pathway|negative regulation of apoptotic process|negative regulation of cysteine-type endopeptidase activity involved in apoptotic process|innate immune response|defense response to virus|negative regulation …
LOC114109074	102.457	50.5287	154.385	3.05606	1.61167	6.23819e-12	4.38548e-10	Up	4.8825	5.51852	6.95768	2.18356	1.75989	1.89878	GeneID:114109074	interferon alpha-inducible protein 27, mitochondrial-like	GO:0001836,GO:0005739,GO:0005743,GO:0005886,GO:0006915,GO:0006955,GO:0016021,GO:0031966,GO:0042058,GO:0043066,GO:0043154,GO:0045087,GO:0051607,GO:0051902,GO:0060337,GO:0072593,GO:0097190,GO:0097193,GO:0098586,GO:2001240	release of cytochrome c from mitochondria|mitochondrion|mitochondrial inner membrane|plasma membrane|apoptotic process|immune response|integral component of membrane|mitochondrial membrane|regulation of epidermal growth factor receptor signaling pathway|negative regulation of apoptotic process|negative regulation of cysteine-type endopeptidase activity involved in apoptotic process|innate immune …
LOC114109611	13.0924	7.49737	18.6873	2.49105	1.31675	0.031699	0.124211	Up	0.360329	0.606687	0.269365	0.133363	0.180702	0.197831	GeneID:114109611	ubiquitin D-like	GO:0001650,GO:0005634,GO:0005737,GO:0006511,GO:0010243,GO:0016235,GO:0016567,GO:0034341,GO:0034612,GO:0043011,GO:0043065,GO:0043123,GO:0070628,GO:0070842,GO:1901990	fibrillar center|nucleus|cytoplasm|ubiquitin-dependent protein catabolic process|response to organonitrogen compound|aggresome|protein ubiquitination|response to interferon-gamma|response to tumor necrosis factor|myeloid dendritic cell differentiation|positive regulation of apoptotic process|positive regulation of I-kappaB kinase/NF-kappaB signaling|proteasome binding|aggresome assembly|regulatio…
LOC114109728	21.5524	41.0839	2.02093	0.0492466	-4.34383	0.0220519	0.0957998	Down	0.0486615	0	0.0970056	2.85764	0.0732102	0.0949923	GeneID:114109728	hippocampus abundant transcript 1 protein-like	GO:0005215,GO:0016021,GO:0055085	transporter activity|integral component of membrane|transmembrane transport
LOC114111330	40.2083	24.794	55.6225	2.24369	1.16587	0.00217824	0.0166144	Up	0.893148	0.973652	0.840777	0.261189	0.680155	0.30673	GeneID:114111330	cAMP-dependent protein kinase inhibitor alpha	GO:0000122,GO:0004862,GO:0005634,GO:0005737,GO:0010389,GO:0034236,GO:0042308,GO:2000480	negative regulation of transcription by RNA polymerase II|cAMP-dependent protein kinase inhibitor activity|nucleus|cytoplasm|regulation of G2/M transition of mitotic cell cycle|protein kinase A catalytic subunit binding|negative regulation of protein import into nucleus|negative regulation of cAMP-dependent protein kinase activity	oas05034	Alcoholism
LOC114112251	15.2774	24.8006	5.75425	0.232191	-2.10661	0.00286378	0.0204652	Down	0.0199015	0.079427	0.0694281	0.35356	0.339336	0.0582747	GeneID:114112251	basic proline-rich protein-like	GO:0005737,GO:0005829,GO:0005886,GO:0005925,GO:0008270,GO:0008285,GO:0030054,GO:0032991	cytoplasm|cytosol|plasma membrane|focal adhesion|zinc ion binding|negative regulation of cell proliferation|cell junction|protein-containing complex	oas04151,oas04510,oas04512,oas04611,oas04926,oas04933,oas04974,oas05146,oas05165	PI3K-Akt signaling pathway|Focal adhesion|ECM-receptor interaction|Platelet activation|Relaxin signaling pathway|AGE-RAGE signaling pathway in diabetic complications|Protein digestion and absorption|Amoebiasis|Human papillomavirus infection
LOC114112699	4.58038	8.49155	0.669213	0.0794708	-3.65343	0.0176876	0.0811117	Down	0	0	0.0190488	0.0660175	0.182098	0	GeneID:114112699	collagen alpha-1(I) chain-like			oas04611,oas04926,oas04933,oas04974,oas05146	Platelet activation|Relaxin signaling pathway|AGE-RAGE signaling pathway in diabetic complications|Protein digestion and absorption|Amoebiasis
LOC114112914	5.91646	9.45758	2.37534	0.251034	-1.99404	0.0300811	0.119679	Down	0.0337673	0.0224609	0.0224381	0.0999822	0.135473	0.0878897	GeneID:114112914	muscle, skeletal receptor tyrosine-protein kinase-like	GO:0001934,GO:0004713,GO:0004714,GO:0004888,GO:0005524,GO:0005737,GO:0005886,GO:0005887,GO:0006355,GO:0007275,GO:0007528,GO:0007613,GO:0008582,GO:0009897,GO:0009968,GO:0010628,GO:0010629,GO:0016020,GO:0017147,GO:0019901,GO:0030054,GO:0030154,GO:0030165,GO:0031594,GO:0032224,GO:0042995,GO:0043066,GO:0043113,GO:0043235,GO:0043525,GO:0045202,GO:0045211,GO:0045887,GO:0046777,GO:0046872,GO:0050731,GO:…	positive regulation of protein phosphorylation|protein tyrosine kinase activity|transmembrane receptor protein tyrosine kinase activity|transmembrane signaling receptor activity|ATP binding|cytoplasm|plasma membrane|integral component of plasma membrane|regulation of transcription, DNA-templated|multicellular organism development|neuromuscular junction development|memory|regulation of synaptic gr…
LOC114112946	10.6068	4.23914	16.9745	4.00347	2.00125	0.00590439	0.0361638	Up	0.134886	0.363373	0.17478	0.0798772	0.0541155	0.0394967	GeneID:114112946	BDNF/NT-3 growth factors receptor-like	GO:0001570,GO:0001764,GO:0004714,GO:0004888,GO:0005030,GO:0005524,GO:0005622,GO:0005737,GO:0005768,GO:0005769,GO:0005791,GO:0005829,GO:0005886,GO:0005887,GO:0007528,GO:0007612,GO:0007616,GO:0007623,GO:0007631,GO:0008284,GO:0009968,GO:0009986,GO:0010628,GO:0010976,GO:0014047,GO:0014068,GO:0014069,GO:0019222,GO:0019227,GO:0021954,GO:0021987,GO:0022011,GO:0030154,GO:0030182,GO:0030424,GO:0030425,GO:…	vasculogenesis|neuron migration|transmembrane receptor protein tyrosine kinase activity|transmembrane signaling receptor activity|neurotrophin receptor activity|ATP binding|intracellular|cytoplasm|endosome|early endosome|rough endoplasmic reticulum|cytosol|plasma membrane|integral component of plasma membrane|neuromuscular junction development|learning|long-term memory|circadian rhythm|feeding be…	oas04010,oas04014,oas04151,oas04722,oas05034	MAPK signaling pathway|Ras signaling pathway|PI3K-Akt signaling pathway|Neurotrophin signaling pathway|Alcoholism
LOC114112948	227.533	144.127	310.939	2.15784	1.10959	2.67826e-11	1.64748e-09	Up	5.3511	4.70472	6.12577	2.82371	2.78096	2.12021	GeneID:114112948	BDNF/NT-3 growth factors receptor-like			oas04010,oas04014,oas04151,oas04722,oas05034	MAPK signaling pathway|Ras signaling pathway|PI3K-Akt signaling pathway|Neurotrophin signaling pathway|Alcoholism
LOC114113186	19.2388	12.3824	26.0953	2.10717	1.07531	0.0325096	0.126575	Up	0.722584	0.781039	0.810256	0.208008	0.362371	0.558346	GeneID:114113186	polypeptide N-acetylgalactosaminyltransferase 13-like			oas00512	Mucin type O-glycan biosynthesis
LOC114113694	14.7534	8.81099	20.6958	2.3493	1.23223	0.0436008	0.156139	Up	0.265745	0.128002	0.164407	0.0542655	0.147056	0.0447209	GeneID:114113694	radical S-adenosyl methionine domain-containing protein 2-like	GO:0001650,GO:0003824,GO:0005741,GO:0005743,GO:0005783,GO:0005789,GO:0005811,GO:0009615,GO:0034157,GO:0034165,GO:0035710,GO:0043367,GO:0043621,GO:0045071,GO:0045087,GO:0046872,GO:0050709,GO:0051539,GO:0051607,GO:2000553	fibrillar center|catalytic activity|mitochondrial outer membrane|mitochondrial inner membrane|endoplasmic reticulum|endoplasmic reticulum membrane|lipid droplet|response to virus|positive regulation of toll-like receptor 7 signaling pathway|positive regulation of toll-like receptor 9 signaling pathway|CD4-positive, alpha-beta T cell activation|CD4-positive, alpha-beta T cell differentiation|prote…	oas05160,oas05164	Hepatitis C|Influenza A
LOC114113733	1106.28	1491.77	720.786	0.483135	-1.0495	7.40755e-22	1.46824e-19	Down	6.48823	6.40375	5.68159	14.579	13.99	11.0675	GeneID:114113733	cyclic nucleotide-gated cation channel alpha-3	GO:0005222,GO:0005223,GO:0007601,GO:0016021,GO:0030553,GO:0050896	intracellular cAMP-activated cation channel activity|intracellular cGMP-activated cation channel activity|visual perception|integral component of membrane|cGMP binding|response to stimulus	oas04024,oas04740	cAMP signaling pathway|Olfactory transduction
LOC114113800	7.77695	1.63001	13.9239	8.53875	3.09403	0.000803056	0.00746607	Up	0.168378	0.157499	0.104893	0.0103865	0.0211101	0.0205432	GeneID:114113800	apolipoprotein L3-like	GO:0005319,GO:0005576,GO:0005737,GO:0006954,GO:0008289,GO:0016020,GO:0042157,GO:0043123	lipid transporter activity|extracellular region|cytoplasm|inflammatory response|lipid binding|membrane|lipoprotein metabolic process|positive regulation of I-kappaB kinase/NF-kappaB signaling
LOC114113813	5.56303	1.95931	9.16675	4.68122	2.22688	0.0278767	0.113116	Up	0.369998	0.246111	0.215128	0.060863	0.123701	0	GeneID:114113813	interleukin-1 receptor accessory protein-like	GO:0004908,GO:0005149,GO:0005737,GO:0006954,GO:0016021,GO:0019966,GO:0030674,GO:0032991,GO:0051965	interleukin-1 receptor activity|interleukin-1 receptor binding|cytoplasm|inflammatory response|integral component of membrane|interleukin-1 binding|protein binding, bridging|protein-containing complex|positive regulation of synapse assembly	oas04010,oas04060,oas04659,oas04750	MAPK signaling pathway|Cytokine-cytokine receptor interaction|Th17 cell differentiation|Inflammatory mediator regulation of TRP channels
LOC114114799	18.9646	9.13742	28.7917	3.15278	1.65662	0.00237821	0.0177973	Up	0.139141	0.195621	0.201726	0.068664	0.0888084	0.0185193	GeneID:114114799	mucin-16-like
LOC114114868	25.4341	14.6751	36.193	2.46777	1.30321	0.0038016	0.0254349	Up	0.81637	0.842621	1.34683	0.555679	0.423521	0.274765	GeneID:114114868	NACHT, LRR and PYD domains-containing protein 3-like	GO:0002374,GO:0002674,GO:0002830,GO:0005524,GO:0005576,GO:0005634,GO:0005737,GO:0005783,GO:0006919,GO:0006954,GO:0008134,GO:0032088,GO:0032611,GO:0032621,GO:0032736,GO:0032753,GO:0032754,GO:0042802,GO:0043280,GO:0043565,GO:0044546,GO:0045087,GO:0045630,GO:0045944,GO:0050701,GO:0050713,GO:0050718,GO:0050830,GO:0051092,GO:0051607,GO:0071222,GO:0071224,GO:0072559,GO:1901223,GO:2000321,GO:2000553	cytokine secretion involved in immune response|negative regulation of acute inflammatory response|positive regulation of type 2 immune response|ATP binding|extracellular region|nucleus|cytoplasm|endoplasmic reticulum|activation of cysteine-type endopeptidase activity involved in apoptotic process|inflammatory response|transcription factor binding|negative regulation of NF-kappaB transcription fac…	oas04217,oas04621,oas04625,oas05133,oas05164	Necroptosis|NOD-like receptor signaling pathway|C-type lectin receptor signaling pathway|Pertussis|Influenza A
LOC114115866	51.0444	27.7116	74.3772	2.68298	1.42383	1.55927e-05	0.000273369	Up	2.21436	1.69229	1.24445	0.558004	0.732449	0.689787	GeneID:114115866	basic salivary proline-rich protein 4-like
LOC114116817	51.7624	84.9161	18.6087	0.219172	-2.18986	0.0494892	0.170587	Down	0.370869	0.176207	0.422467	0.383467	3.84375	0.361987	GeneID:114116817	sphingosine kinase 1-like	GO:0000287,GO:0001568,GO:0003677,GO:0003951,GO:0005516,GO:0005524,GO:0005634,GO:0005737,GO:0005829,GO:0005886,GO:0006457,GO:0006670,GO:0006954,GO:0007165,GO:0007420,GO:0008481,GO:0010800,GO:0010803,GO:0017050,GO:0019722,GO:0030148,GO:0030307,GO:0030335,GO:0031398,GO:0032651,GO:0035556,GO:0038036,GO:0043066,GO:0045766,GO:0045931,GO:0045987,GO:0046512,GO:0046521,GO:0048146,GO:0051092,GO:0051721,GO:…	magnesium ion binding|blood vessel development|DNA binding|NAD+ kinase activity|calmodulin binding|ATP binding|nucleus|cytoplasm|cytosol|plasma membrane|protein folding|sphingosine metabolic process|inflammatory response|signal transduction|brain development|sphinganine kinase activity|positive regulation of peptidyl-threonine phosphorylation|regulation of tumor necrosis factor-mediated signaling…	oas00600,oas04020,oas04071,oas04072,oas04370,oas04371,oas04666,oas05152	Sphingolipid metabolism|Calcium signaling pathway|Sphingolipid signaling pathway|Phospholipase D signaling pathway|VEGF signaling pathway|Apelin signaling pathway|Fc gamma R-mediated phagocytosis|Tuberculosis
LOC114117594	159.137	214.87	103.403	0.48123	-1.0552	3.11696e-05	0.000502056	Down	1.34707	1.77169	1.54102	1.85831	4.45246	3.67549	GeneID:114117594	nucleolar protein 56-like	GO:0001650,GO:0005654,GO:0005732,GO:0005737,GO:0030515,GO:0031428,GO:0032040,GO:0042254,GO:0070761,GO:1990226	fibrillar center|nucleoplasm|small nucleolar ribonucleoprotein complex|cytoplasm|snoRNA binding|box C/D snoRNP complex|small-subunit processome|ribosome biogenesis|pre-snoRNP complex|histone methyltransferase binding	oas03008	Ribosome biogenesis in eukaryotes
LOC114117787	100.534	57.3901	143.677	2.50393	1.3242	5.26971e-09	2.16726e-07	Up	7.27624	8.98558	8.97646	3.64959	3.82844	2.91065	GeneID:114117787	C-C motif chemokine 17-like	GO:0002548,GO:0005615,GO:0006954,GO:0007186,GO:0008009,GO:0030593,GO:0043547,GO:0045662,GO:0048020,GO:0048247,GO:0070098,GO:0070374,GO:0071346,GO:0071347,GO:0071356	monocyte chemotaxis|extracellular space|inflammatory response|G protein-coupled receptor signaling pathway|chemokine activity|neutrophil chemotaxis|positive regulation of GTPase activity|negative regulation of myoblast differentiation|CCR chemokine receptor binding|lymphocyte chemotaxis|chemokine-mediated signaling pathway|positive regulation of ERK1 and ERK2 cascade|cellular response to interfer…	oas04060,oas04062,oas04625,oas04657	Cytokine-cytokine receptor interaction|Chemokine signaling pathway|C-type lectin receptor signaling pathway|IL-17 signaling pathway
LOC114118847	49.1209	70.4345	27.8073	0.394769	-1.34092	0.00174275	0.0139724	Down	0.423506	0.969387	0.645602	0.688452	2.64857	1.99387	GeneID:114118847	transmembrane protein KIAA1109-like	GO:0001558,GO:0005634,GO:0016020,GO:0016021,GO:0030856,GO:0048488,GO:0098793	regulation of cell growth|nucleus|membrane|integral component of membrane|regulation of epithelial cell differentiation|synaptic vesicle endocytosis|presynapse
LOC114118855	48.3161	83.7979	12.8343	0.153209	-2.70642	0.0114716	0.0595097	Down	0.476457	0.237693	0.791505	8.03344	1.07523	0.968847	GeneID:114118855	serine/threonine-protein phosphatase PP1-gamma catalytic subunit-like			oas03015,oas04022,oas04024,oas04114,oas04218,oas04261,oas04270,oas04390,oas04510,oas04611,oas04720,oas04728,oas04750,oas04810,oas04910,oas04921,oas04931,oas05031,oas05034,oas05168,oas05205	mRNA surveillance pathway|cGMP-PKG signaling pathway|cAMP signaling pathway|Oocyte meiosis|Cellular senescence|Adrenergic signaling in cardiomyocytes|Vascular smooth muscle contraction|Hippo signaling pathway|Focal adhesion|Platelet activation|Long-term potentiation|Dopaminergic synapse|Inflammatory mediator regulation of TRP channels|Regulation of actin cytoskeleton|Insulin signaling pathway|Oxy…
LOC780455	348.202	476.872	219.532	0.460376	-1.11912	0.00240574	0.0179656	Down	2.16954	1.46381	2.11815	5.26544	5.11008	2.50812	GeneID:780455	caspase-14	GO:0004175,GO:0004197,GO:0005634,GO:0005737,GO:0005739,GO:0005829,GO:0006915,GO:0008544,GO:0008630,GO:0031424,GO:0045095,GO:0070268,GO:0097153	endopeptidase activity|cysteine-type endopeptidase activity|nucleus|cytoplasm|mitochondrion|cytosol|apoptotic process|epidermis development|intrinsic apoptotic signaling pathway in response to DNA damage|keratinization|keratin filament|cornification|cysteine-type endopeptidase activity involved in apoptotic process
LRP11	50.2326	32.2906	68.1745	2.11138	1.07819	0.00107024	0.00937591	Up	0.471756	0.601872	0.477926	0.312951	0.294758	0.15097	GeneID:101104759	LDL receptor related protein 11	GO:0005886,GO:0009408,GO:0009409,GO:0009414,GO:0009612,GO:0016021,GO:0033555,GO:0035902,GO:0042594,GO:0051219	plasma membrane|response to heat|response to cold|response to water deprivation|response to mechanical stimulus|integral component of membrane|multicellular organismal response to stress|response to immobilization stress|response to starvation|phosphoprotein binding
LRRC25	10.4026	5.87094	14.9342	2.54349	1.34681	0.0470428	0.164909	Up	0.173342	0.196012	0.138221	0.10265	0.0695437	0.0338381	GeneID:101108744	leucine rich repeat containing 25	GO:0005737,GO:0016021	cytoplasm|integral component of membrane
LRRC55	812.554	1210.32	414.793	0.342734	-1.54484	1.03129e-39	6.68982e-37	Down	2.02892	1.49491	1.92452	5.49694	5.02259	5.83653	GeneID:114118465	leucine rich repeat containing 55	GO:0005249,GO:0005887,GO:0008076,GO:0044325,GO:0071805,GO:0099104,GO:1903818	voltage-gated potassium channel activity|integral component of plasma membrane|voltage-gated potassium channel complex|ion channel binding|potassium ion transmembrane transport|potassium channel activator activity|positive regulation of voltage-gated potassium channel activity
LRRTM4	46.278	27.7209	64.8351	2.33851	1.22559	0.000442889	0.00461012	Up	0.532279	0.668135	0.436414	0.321985	0.249713	0.150832	GeneID:101119705	leucine rich repeat transmembrane neuronal 4	GO:0005615,GO:0016021,GO:0030054,GO:0031012,GO:0045211	extracellular space|integral component of membrane|cell junction|extracellular matrix|postsynaptic membrane
LTBP4	606.462	827.665	385.259	0.46541	-1.10342	2.24123e-24	5.71155e-22	Down	2.13255	1.91966	1.86054	4.26099	4.20462	4.61589	GeneID:101120267	latent transforming growth factor beta binding protein 4	GO:0001558,GO:0005024,GO:0005178,GO:0005201,GO:0005509,GO:0005539,GO:0005576,GO:0005615,GO:0006457,GO:0007179,GO:0007275,GO:0017015,GO:0030162,GO:0030252,GO:0031012,GO:0045595,GO:0050431,GO:0062023	regulation of cell growth|transforming growth factor beta-activated receptor activity|integrin binding|extracellular matrix structural constituent|calcium ion binding|glycosaminoglycan binding|extracellular region|extracellular space|protein folding|transforming growth factor beta receptor signaling pathway|multicellular organism development|regulation of transforming growth factor beta receptor …
LUZP2	189.982	113.743	266.221	2.34066	1.22692	1.36067e-11	8.82644e-10	Up	1.42885	1.3739	1.71707	0.619822	0.566313	0.79854	GeneID:101118830	leucine zipper protein 2	GO:0005576	extracellular region
LVRN	151.79	95.5712	208.009	2.17697	1.12232	5.5656e-07	1.48739e-05	Up	1.57667	1.19414	1.62153	0.615378	0.963201	0.503643	GeneID:101102734	laeverin	GO:0005737,GO:0005886,GO:0006508,GO:0008270,GO:0016021,GO:0042277,GO:0043171,GO:0070006	cytoplasm|plasma membrane|proteolysis|zinc ion binding|integral component of membrane|peptide binding|peptide catabolic process|metalloaminopeptidase activity
MAN1C1	321.547	429.595	213.499	0.49699	-1.00871	0.00674009	0.0398458	Down	1.1997	1.44287	1.43494	3.5458	3.38218	1.53808	GeneID:101118089	mannosidase alpha class 1C member 1	GO:0000139,GO:0004571,GO:0005509,GO:0005783,GO:0006487,GO:0006491,GO:0030173,GO:0070062,GO:1904381	Golgi membrane|mannosyl-oligosaccharide 1,2-alpha-mannosidase activity|calcium ion binding|endoplasmic reticulum|protein N-linked glycosylation|N-glycan processing|integral component of Golgi membrane|extracellular exosome|Golgi apparatus mannose trimming	oas00510,oas04141	N-Glycan biosynthesis|Protein processing in endoplasmic reticulum
MAPK13	15.7862	23.4494	8.12307	0.346562	-1.52882	0.0119409	0.0611004	Down	0.121864	0.162121	0.202445	0.420969	0.224085	0.792973	GeneID:100194428	mitogen-activated protein kinase 13	GO:0004707,GO:0005524,GO:0005634,GO:0005737,GO:0007049,GO:0010468,GO:0035556,GO:0071310	MAP kinase activity|ATP binding|nucleus|cytoplasm|cell cycle|regulation of gene expression|intracellular signal transduction|cellular response to organic substance	oas01522,oas04010,oas04015,oas04068,oas04071,oas04218,oas04261,oas04370,oas04380,oas04550,oas04611,oas04620,oas04621,oas04622,oas04625,oas04657,oas04658,oas04659,oas04660,oas04664,oas04668,oas04670,oas04714,oas04722,oas04723,oas04728,oas04750,oas04912,oas04914,oas04917,oas04926,oas04933,oas05014,oas05132,oas05133,oas05140,oas05142,oas05145,oas05152,oas05161,oas05163,oas05167,oas05169,oas05170,oas…	Endocrine resistance|MAPK signaling pathway|Rap1 signaling pathway|FoxO signaling pathway|Sphingolipid signaling pathway|Cellular senescence|Adrenergic signaling in cardiomyocytes|VEGF signaling pathway|Osteoclast differentiation|Signaling pathways regulating pluripotency of stem cells|Platelet activation|Toll-like receptor signaling pathway|NOD-like receptor signaling pathway|RIG-I-like receptor…
2023-03-11	315.253	199.515	430.991	2.16002	1.11105	1.64818e-17	2.21898e-15	Up	5.03364	5.12818	4.79398	2.40841	2.35289	2.37025	GeneID:101102675	membrane associated ring-CH-type finger 11	GO:0008270,GO:0016021,GO:0016567,GO:0016740,GO:0030659	zinc ion binding|integral component of membrane|protein ubiquitination|transferase activity|cytoplasmic vesicle membrane
MATN2	6.86945	12.7153	1.02363	0.080109	-3.64189	0.000856187	0.00783749	Down	0.00776999	0.015505	0	0.0920252	0.109105	0.0985908	GeneID:101107106	matrilin 2	GO:0001764,GO:0003429,GO:0005201,GO:0005509,GO:0005604,GO:0005615,GO:0007411,GO:0008347,GO:0031012,GO:0031104,GO:0048678,GO:0062023	neuron migration|growth plate cartilage chondrocyte morphogenesis|extracellular matrix structural constituent|calcium ion binding|basement membrane|extracellular space|axon guidance|glial cell migration|extracellular matrix|dendrite regeneration|response to axon injury|collagen-containing extracellular matrix
MATN4	9.87015	14.6683	5.072	0.346191	-1.53036	0.0264968	0.109193	Down	0.0476726	0.0475654	0.083155	0.188206	0.155399	0.186124	GeneID:101108412	matrilin 4	GO:0003429,GO:0005509,GO:0005576,GO:0005615,GO:0030198,GO:0031012	growth plate cartilage chondrocyte morphogenesis|calcium ion binding|extracellular region|extracellular space|extracellular matrix organization|extracellular matrix
MBOAT2	28.9918	41.3965	16.587	0.400893	-1.31871	0.00244661	0.0181757	Down	0.0615989	0.193161	0.175423	0.364778	0.335392	0.403687	GeneID:101116033	membrane bound O-acyltransferase domain containing 2	GO:0003841,GO:0005789,GO:0008654,GO:0016021,GO:0036151,GO:0036152,GO:0047144	1-acylglycerol-3-phosphate O-acyltransferase activity|endoplasmic reticulum membrane|phospholipid biosynthetic process|integral component of membrane|phosphatidylcholine acyl-chain remodeling|phosphatidylethanolamine acyl-chain remodeling|2-acylglycerol-3-phosphate O-acyltransferase activity	oas00561,oas00564	Glycerolipid metabolism|Glycerophospholipid metabolism
MCF2L2	49.0407	32.6035	65.4779	2.00801	1.00577	0.00258629	0.0189959	Up	0.345859	0.424281	0.322126	0.111919	0.238844	0.210294	GeneID:101109765	MCF.2 cell line derived transforming sequence-like 2	GO:0005089,GO:0035023	Rho guanyl-nucleotide exchange factor activity|regulation of Rho protein signal transduction
MEIOB	1.70277	0	3.40555	18.9156	4.2415	0.0271143	0.110937	Up	0.0628364	0.0783688	0.0156578	0	0	0	GeneID:101113643	meiosis specific with OB-fold	GO:0000712,GO:0000724,GO:0003682,GO:0003697,GO:0005634,GO:0005694,GO:0005737,GO:0007129,GO:0007140,GO:0007141,GO:0007144,GO:0008310,GO:0009566	resolution of meiotic recombination intermediates|double-strand break repair via homologous recombination|chromatin binding|single-stranded DNA binding|nucleus|chromosome|cytoplasm|synapsis|male meiotic nuclear division|male meiosis I|female meiosis I|single-stranded DNA 3'-5' exodeoxyribonuclease activity|fertilization
MEOX1	14.7932	6.52202	23.0644	3.5364	1.82228	0.00178375	0.0142371	Up	0.257774	0.159638	0.186055	0.0701836	0.0624071	0.0433794	GeneID:101110776	mesenchyme homeobox 1	GO:0000978,GO:0001077,GO:0001757,GO:0003682,GO:0003700,GO:0005634,GO:0005737,GO:0043565,GO:0060218,GO:0061053,GO:0061056,GO:0071837	RNA polymerase II proximal promoter sequence-specific DNA binding|proximal promoter DNA-binding transcription activator activity, RNA polymerase II-specific|somite specification|chromatin binding|DNA-binding transcription factor activity|nucleus|cytoplasm|sequence-specific DNA binding|hematopoietic stem cell differentiation|somite development|sclerotome development|HMG box domain binding
MFAP2	1502.5	2073.14	931.859	0.449442	-1.15379	1.5675e-33	6.39136e-31	Down	12.6921	10.5691	10.0141	26.3109	25.3626	24.6104	GeneID:101110395	microfibril associated protein 2	GO:0001527	microfibril
MGAT5B	9.76928	4.23663	15.3019	3.60872	1.85149	0.0113917	0.0592674	Up	0.1343	0.141442	0.059494	0.0368194	0.0224501	0.036412	GeneID:101115810	alpha-1,6-mannosylglycoprotein 6-beta-N-acetylglucosaminyltransferase B	GO:0000139,GO:0005794,GO:0006487,GO:0016021,GO:0030144,GO:0046872	Golgi membrane|Golgi apparatus|protein N-linked glycosylation|integral component of membrane|alpha-1,6-mannosylglycoprotein 6-beta-N-acetylglucosaminyltransferase activity|metal ion binding	oas00510,oas00515	N-Glycan biosynthesis|Mannose type O-glycan biosynthesis
MME	45.4944	19.2511	71.7377	3.72857	1.89862	2.28278e-06	5.24598e-05	Up	0.477867	0.272453	0.562909	0.128629	0.180513	0.0545169	GeneID:101112618	membrane metalloendopeptidase	GO:0001822,GO:0004175,GO:0004222,GO:0005737,GO:0005886,GO:0005903,GO:0006508,GO:0006518,GO:0008021,GO:0008233,GO:0008237,GO:0008238,GO:0008270,GO:0016020,GO:0016021,GO:0019233,GO:0030424,GO:0030425,GO:0042277,GO:0044306,GO:0045202,GO:0046449,GO:0050435,GO:0071345,GO:0071492,GO:0071493,GO:0090399,GO:0097242	kidney development|endopeptidase activity|metalloendopeptidase activity|cytoplasm|plasma membrane|brush border|proteolysis|peptide metabolic process|synaptic vesicle|peptidase activity|metallopeptidase activity|exopeptidase activity|zinc ion binding|membrane|integral component of membrane|sensory perception of pain|axon|dendrite|peptide binding|neuron projection terminus|synapse|creatinine metabo…	oas04614,oas04640,oas04974,oas05010	Renin-angiotensin system|Hematopoietic cell lineage|Protein digestion and absorption|Alzheimer disease
MMP11	1106.36	1679.05	533.663	0.317799	-1.65382	2.61476e-40	1.86576e-37	Down	2.76836	2.67382	2.27902	9.31308	9.14362	6.60396	GeneID:101110364	matrix metallopeptidase 11
MMP13	16.4925	30.9577	2.02738	0.0656439	-3.92919	3.19656e-07	9.01544e-06	Down	0	0.0595072	0.0594467	0.451293	0.558314	0.85379	GeneID:443113	matrix metallopeptidase 13	GO:0004222,GO:0005509,GO:0005518,GO:0008270,GO:0022617,GO:0030574,GO:0031012,GO:0060349	metalloendopeptidase activity|calcium ion binding|collagen binding|zinc ion binding|extracellular matrix disassembly|collagen catabolic process|extracellular matrix|bone morphogenesis	oas04657,oas04926,oas04928	IL-17 signaling pathway|Relaxin signaling pathway|Parathyroid hormone synthesis, secretion and action
MMP17	108.498	170.934	46.0612	0.269554	-1.89135	4.44575e-10	2.24983e-08	Down	0.371508	0.63373	0.621141	2.51936	2.60832	1.09953	GeneID:101117966	matrix metallopeptidase 17	GO:0001822,GO:0004222,GO:0005886,GO:0006508,GO:0008047,GO:0008270,GO:0031012,GO:0031225,GO:0042756,GO:0070006	kidney development|metalloendopeptidase activity|plasma membrane|proteolysis|enzyme activator activity|zinc ion binding|extracellular matrix|anchored component of membrane|drinking behavior|metalloaminopeptidase activity	oas04928	Parathyroid hormone synthesis, secretion and action
MMP9	16.8943	29.0446	4.74397	0.163385	-2.61365	0.000200509	0.00242703	Down	0.0477535	0.0595576	0.0594972	0.49488	0.490935	0.0699148	GeneID:100192422	matrix metallopeptidase 9	GO:0001503,GO:0004222,GO:0005615,GO:0006508,GO:0008270,GO:0030574,GO:0031012,GO:0050900	ossification|metalloendopeptidase activity|extracellular space|proteolysis|zinc ion binding|collagen catabolic process|extracellular matrix|leukocyte migration	oas01522,oas04657,oas04668,oas04670,oas04915,oas04926,oas05161,oas05200,oas05202,oas05205,oas05206,oas05215,oas05219,oas05418	Endocrine resistance|IL-17 signaling pathway|TNF signaling pathway|Leukocyte transendothelial migration|Estrogen signaling pathway|Relaxin signaling pathway|Hepatitis B|Pathways in cancer|Transcriptional misregulation in cancer|Proteoglycans in cancer|MicroRNAs in cancer|Prostate cancer|Bladder cancer|Fluid shear stress and atherosclerosis
MPP7	31.9483	21.2138	42.6827	2.01292	1.00929	0.0239481	0.101625	Up	0.223933	0.241068	0.276066	0.0930591	0.230512	0.0575183	GeneID:101120006	membrane palmitoylated protein 7	GO:0005654,GO:0005923,GO:0019904,GO:0031334,GO:0032947,GO:0046982,GO:0070830,GO:0071896,GO:0097025	nucleoplasm|bicellular tight junction|protein domain specific binding|positive regulation of protein complex assembly|protein-containing complex scaffold activity|protein heterodimerization activity|bicellular tight junction assembly|protein localization to adherens junction|MPP7-DLG1-LIN7 complex
MSI1	1.95644	3.91289	0	0.0478101	-4.38654	0.0148474	0.071511	Down	0	0	0	0.0608852	0.103122	0.080282	GeneID:101112004	musashi RNA binding protein 1	GO:0003723,GO:0005634,GO:0005737,GO:0005844,GO:0007399,GO:0008266,GO:0042802,GO:1990904	RNA binding|nucleus|cytoplasm|polysome|nervous system development|poly(U) RNA binding|identical protein binding|ribonucleoprotein complex	oas03015	mRNA surveillance pathway
MYBL1	23.2542	15.3215	31.1868	2.03543	1.02533	0.0210672	0.0927646	Up	0.140193	0.201423	0.173272	0.0664158	0.0956156	0.0985214	GeneID:101121782	MYB proto-oncogene like 1
MYCL	38.6242	24.1065	53.1418	2.20452	1.14047	0.00331772	0.0229618	Up	0.405162	0.339571	0.524993	0.199942	0.105657	0.284731	GeneID:101121392	MYCL proto-oncogene, bHLH transcription factor	GO:0000981,GO:0003677,GO:0005634,GO:0045607,GO:0046983	DNA-binding transcription factor activity, RNA polymerase II-specific|DNA binding|nucleus|regulation of inner ear auditory receptor cell differentiation|protein dimerization activity
MYH15	78.1936	35.8662	120.521	3.36136	1.74905	7.2747e-11	4.24339e-09	Up	0.349975	0.438343	0.534384	0.124938	0.153105	0.127189	GeneID:101111932	myosin heavy chain 15	GO:0002074,GO:0003774,GO:0005516,GO:0005524,GO:0030016,GO:0032982,GO:0051015	extraocular skeletal muscle development|motor activity|calmodulin binding|ATP binding|myofibril|myosin filament|actin filament binding	oas04530	Tight junction
MYO1F	4.08082	7.82703	0.334607	0.0465544	-4.42494	0.0032632	0.0226504	Down	0	0	0.00739949	0.0805969	0.059567	0.0362296	GeneID:101104826	myosin IF	GO:0003774,GO:0003779,GO:0005516,GO:0005524,GO:0016461	motor activity|actin binding|calmodulin binding|ATP binding|unconventional myosin complex
MYOM3	6.56843	10.7615	2.37534	0.220609	-2.18043	0.014531	0.0703193	Down	0.0145582	0.00968363	0.0096738	0.0431056	0.0681411	0.0473651	GeneID:101118423	myomesin 3	GO:0005865,GO:0006936,GO:0008307,GO:0030017,GO:0030018,GO:0030240,GO:0030241,GO:0031430,GO:0042803,GO:0045214,GO:0048739,GO:0051015,GO:0051371,GO:0055003,GO:0055008	striated muscle thin filament|muscle contraction|structural constituent of muscle|sarcomere|Z disc|skeletal muscle thin filament assembly|skeletal muscle myosin thick filament assembly|M band|protein homodimerization activity|sarcomere organization|cardiac muscle fiber development|actin filament binding|muscle alpha-actinin binding|cardiac myofibril assembly|cardiac muscle tissue morphogenesis
MYOZ3	15.1845	20.8677	9.50129	0.455128	-1.13566	0.038863	0.143719	Down	0.370847	0.302738	0.268827	0.532387	0.879165	0.723932	GeneID:100528014	myozenin 3	GO:0003779,GO:0015629,GO:0030018,GO:0031433,GO:0051373	actin binding|actin cytoskeleton|Z disc|telethonin binding|FATZ binding
NANOS1	5.24796	8.47505	2.02086	0.239268	-2.0633	0.0415335	0.150861	Down	0.0165398	0.0165026	0.0659433	0.195892	0.0995349	0.129149	GeneID:101122152	nanos C2HC-type zinc finger 1	GO:0001558,GO:0001894,GO:0003723,GO:0005737,GO:0008270,GO:0010608,GO:0010631,GO:0016477,GO:0017148,GO:0030371,GO:0048471,GO:0098749,GO:1900153	regulation of cell growth|tissue homeostasis|RNA binding|cytoplasm|zinc ion binding|posttranscriptional regulation of gene expression|epithelial cell migration|cell migration|negative regulation of translation|translation repressor activity|perinuclear region of cytoplasm|cerebellar neuron development|positive regulation of nuclear-transcribed mRNA catabolic process, deadenylation-dependent decay
NCF4	125.359	173.487	77.2298	0.445295	-1.16717	1.62869e-07	4.94532e-06	Down	1.62804	1.29539	1.76652	4.18997	3.9479	2.71547	GeneID:101122939	neutrophil cytosolic factor 4	GO:0005829,GO:0006801,GO:0006909,GO:0006955,GO:0010008,GO:0016020,GO:0016176,GO:0032010,GO:0032266,GO:0035091,GO:0043020,GO:0045730,GO:0046983,GO:0048010,GO:0055114	cytosol|superoxide metabolic process|phagocytosis|immune response|endosome membrane|membrane|superoxide-generating NADPH oxidase activator activity|phagolysosome|phosphatidylinositol-3-phosphate binding|phosphatidylinositol binding|NADPH oxidase complex|respiratory burst|protein dimerization activity|vascular endothelial growth factor receptor signaling pathway|oxidation-reduction process	oas04145,oas04380,oas04670,oas05140	Phagosome|Osteoclast differentiation|Leukocyte transendothelial migration|Leishmaniasis
NCKAP1L	181.003	92.6027	269.403	2.90963	1.54084	1.01419e-18	1.53974e-16	Up	1.39963	1.60099	1.64606	0.55487	0.604988	0.485855	GeneID:101119198	NCK associated protein 1 like	GO:0000902,GO:0001782,GO:0002262,GO:0005096,GO:0005829,GO:0005886,GO:0005887,GO:0006935,GO:0016020,GO:0016477,GO:0030011,GO:0030031,GO:0030295,GO:0030593,GO:0030667,GO:0030838,GO:0030866,GO:0030890,GO:0031209,GO:0032700,GO:0032715,GO:0033630,GO:0034101,GO:0035509,GO:0038096,GO:0042102,GO:0042327,GO:0042493,GO:0043029,GO:0043066,GO:0043312,GO:0043372,GO:0043378,GO:0044877,GO:0045579,GO:0045588,GO:…	cell morphogenesis|B cell homeostasis|myeloid cell homeostasis|GTPase activator activity|cytosol|plasma membrane|integral component of plasma membrane|chemotaxis|membrane|cell migration|maintenance of cell polarity|cell projection assembly|protein kinase activator activity|neutrophil chemotaxis|secretory granule membrane|positive regulation of actin filament polymerization|cortical actin cytoskel…	oas04810	Regulation of actin cytoskeleton
NDRG4	4.75967	7.81986	1.69948	0.216982	-2.20435	0.04161	0.15106	Down	0.0154759	0.0154411	0.00771272	0.0916458	0.0232832	0.0679738	GeneID:101122719	NDRG family member 4	GO:0001947,GO:0005737,GO:0005739,GO:0005789,GO:0005829,GO:0007165,GO:0007420,GO:0008542,GO:0010642,GO:0010976,GO:0014912,GO:0016323,GO:0030154,GO:0031253,GO:0035050,GO:0048278,GO:0048662,GO:0060038,GO:0060973,GO:0070374,GO:2001135	heart looping|cytoplasm|mitochondrion|endoplasmic reticulum membrane|cytosol|signal transduction|brain development|visual learning|negative regulation of platelet-derived growth factor receptor signaling pathway|positive regulation of neuron projection development|negative regulation of smooth muscle cell migration|basolateral plasma membrane|cell differentiation|cell projection membrane|embryoni…
NECTIN4	22.6008	14.9983	30.2034	2.01329	1.00955	0.0232905	0.0995804	Up	0.2957	0.244458	0.210526	0.133416	0.135581	0.115448	GeneID:101123428	nectin cell adhesion molecule 4	GO:0005886,GO:0005913,GO:0007156,GO:0007157,GO:0016021,GO:0038023,GO:0042803,GO:0043296,GO:0046718,GO:0050839	plasma membrane|cell-cell adherens junction|homophilic cell adhesion via plasma membrane adhesion molecules|heterophilic cell-cell adhesion via plasma membrane cell adhesion molecules|integral component of membrane|signaling receptor activity|protein homodimerization activity|apical junction complex|viral entry into host cell|cell adhesion molecule binding	oas04520	Adherens junction
NEFH	30.9784	15.3122	46.6445	3.04684	1.60731	0.000861775	0.00787349	Up	0.213976	0.39283	0.571585	0.0591328	0.120184	0.217206	GeneID:101107472	neurofilament heavy			oas05014	Amyotrophic lateral sclerosis (ALS)
NEFL	4.55253	0.975533	8.12952	8.321	3.05676	0.0154118	0.0734854	Up	0.0308924	0.084763	0.0692811	0	0	0.0226144	GeneID:101119539	neurofilament light	GO:0000226,GO:0005200,GO:0005882,GO:0005883,GO:0008022,GO:0008089,GO:0008090,GO:0014012,GO:0019896,GO:0030424,GO:0030674,GO:0031133,GO:0031594,GO:0033693,GO:0040011,GO:0042802,GO:0043209,GO:0043524,GO:0045109,GO:0045110,GO:0048812,GO:0050772,GO:0050885,GO:0060052,GO:0060074,GO:0098685,GO:0098981,GO:0099160,GO:0099182,GO:0099184,GO:1904115	microtubule cytoskeleton organization|structural constituent of cytoskeleton|intermediate filament|neurofilament|protein C-terminus binding|anterograde axonal transport|retrograde axonal transport|peripheral nervous system axon regeneration|axonal transport of mitochondrion|axon|protein binding, bridging|regulation of axon diameter|neuromuscular junction|neurofilament bundle assembly|locomotion|i…	oas05014	Amyotrophic lateral sclerosis (ALS)
NEGR1	85.2854	55.0673	115.504	2.09746	1.06864	0.00059769	0.00586633	Up	0.567936	0.434438	0.608539	0.130792	0.256334	0.401892	GeneID:101119516	neuronal growth regulator 1	GO:0005886,GO:0007155,GO:0031225	plasma membrane|cell adhesion|anchored component of membrane	oas04514	Cell adhesion molecules (CAMs)
NETO2	91.5659	58.9656	124.166	2.10512	1.0739	0.000246503	0.00288348	Up	0.660399	0.533628	0.505273	0.183604	0.209906	0.435775	GeneID:101114803	neuropilin and tolloid like 2	GO:0014069,GO:0016021,GO:0035255,GO:2000312	postsynaptic density|integral component of membrane|ionotropic glutamate receptor binding|regulation of kainate selective glutamate receptor activity
NFASC	6.91802	1.30322	12.5328	9.61397	3.26513	0.00130576	0.0110394	Up	0.102904	0.0449193	0.0897473	0.00634772	0.00645071	0.012555	GeneID:101109290	neurofascin	GO:0002175,GO:0005886,GO:0005925,GO:0007411,GO:0007422,GO:0016021,GO:0019226,GO:0019904,GO:0030425,GO:0030913,GO:0033010,GO:0033268,GO:0033270,GO:0042552,GO:0043194,GO:0043209,GO:0043312,GO:0045162,GO:0050808,GO:0071205,GO:0072659,GO:0086080,GO:0097454,GO:0101003	protein localization to paranode region of axon|plasma membrane|focal adhesion|axon guidance|peripheral nervous system development|integral component of membrane|transmission of nerve impulse|protein domain specific binding|dendrite|paranodal junction assembly|paranodal junction|node of Ranvier|paranode region of axon|myelination|axon initial segment|myelin sheath|neutrophil degranulation|cluster…	oas04514	Cell adhesion molecules (CAMs)
NPY5R	69.119	39.1174	99.1205	2.53314	1.34093	3.13048e-06	6.95873e-05	Up	1.30799	1.16646	0.899914	0.319881	0.510826	0.5423	GeneID:101106846	neuropeptide Y receptor Y5	GO:0001601,GO:0001602,GO:0005886,GO:0007268,GO:0016020,GO:0016021,GO:0043005	peptide YY receptor activity|pancreatic polypeptide receptor activity|plasma membrane|chemical synaptic transmission|membrane|integral component of membrane|neuron projection	oas04080	Neuroactive ligand-receptor interaction
NR2E1	12.081	6.51789	17.644	2.70592	1.43612	0.020467	0.0906812	Up	0.174781	0.228884	0.163323	0.0754706	0.0547822	0.0852977	GeneID:101117512	nuclear receptor subfamily 2 group E member 1	GO:0000981,GO:0001077,GO:0001078,GO:0001662,GO:0002118,GO:0003707,GO:0005654,GO:0006367,GO:0007399,GO:0007601,GO:0008270,GO:0021542,GO:0021764,GO:0021772,GO:0021819,GO:0021872,GO:0021895,GO:0021960,GO:0030198,GO:0035019,GO:0035176,GO:0042826,GO:0043066,GO:0043565,GO:0045165,GO:0045665,GO:0045766,GO:0045787,GO:0048712,GO:0048814,GO:0060041,GO:0060164,GO:0060291,GO:0090049,GO:2000178,GO:2000179,GO:…	DNA-binding transcription factor activity, RNA polymerase II-specific|proximal promoter DNA-binding transcription activator activity, RNA polymerase II-specific|proximal promoter DNA-binding transcription repressor activity, RNA polymerase II-specific|behavioral fear response|aggressive behavior|steroid hormone receptor activity|nucleoplasm|transcription initiation from RNA polymerase II promoter…
NRIP3	15.9043	9.4531	22.3554	2.3652	1.24196	0.0229749	0.0986682	Up	0.185936	0.118731	0.185329	0.095427	0.0522175	0.0653338	GeneID:101105944	nuclear receptor interacting protein 3	GO:0004190	aspartic-type endopeptidase activity
NTRK2	248.506	102.048	394.964	3.87096	1.95269	6.0618e-34	2.62145e-31	Up	1.25883	1.41759	1.60693	0.410511	0.380253	0.348486	GeneID:101116015	neurotrophic receptor tyrosine kinase 2			oas04010,oas04014,oas04151,oas04722,oas05034	MAPK signaling pathway|Ras signaling pathway|PI3K-Akt signaling pathway|Neurotrophin signaling pathway|Alcoholism
NXPH4	46.5087	64.5401	28.4774	0.441201	-1.18049	0.00020202	0.00244325	Down	0.505701	0.437289	0.470448	1.19787	0.946794	1.15171	GeneID:101120405	neurexophilin 4	GO:0005102,GO:0005576	signaling receptor binding|extracellular region
OLFML1	23.4019	33.2545	13.5492	0.407571	-1.29488	0.00553994	0.034449	Down	0.0564789	0.144905	0.120631	0.222972	0.307515	0.283507	GeneID:101112085	olfactomedin like 1	GO:0005576	extracellular region
OLFML2B	1493.04	2058.33	927.747	0.450736	-1.14964	4.98594e-21	9.36242e-19	Down	8.62807	6.83554	7.99237	19.9631	19.7187	13.9603	GeneID:101107748	olfactomedin like 2B	GO:0030198,GO:0031012,GO:0050840	extracellular matrix organization|extracellular matrix|extracellular matrix binding
OPN1LW	26.4397	16.6271	36.2523	2.18062	1.12474	0.00757821	0.0434603	Up	0.764272	0.965901	0.990313	0.301726	0.511036	0.472447	GeneID:101109774	opsin 1, long wave sensitive	GO:0004930,GO:0007601,GO:0007602,GO:0009881,GO:0016021,GO:0018298	G protein-coupled receptor activity|visual perception|phototransduction|photoreceptor activity|integral component of membrane|protein-chromophore linkage
OTULINL	9.067	13.3767	4.75726	0.355312	-1.49284	0.0464519	0.163481	Down	0.0615091	0.0511423	0.0306543	0.10118	0.226207	0.0900541	GeneID:101103673	OTU deubiquitinase with linear linkage specificity like
PALD1	111.559	154.234	68.8841	0.446467	-1.16337	1.22087e-07	3.77941e-06	Down	0.422566	0.382783	0.321433	0.943875	0.936882	0.721781	GeneID:101110645	phosphatase domain containing paladin 1	GO:0004722,GO:0004725,GO:0005737,GO:0005829	protein serine/threonine phosphatase activity|protein tyrosine phosphatase activity|cytoplasm|cytosol
PCED1B	15.9521	24.7847	7.11956	0.287257	-1.79958	0.00328253	0.0227624	Down	0.0511577	0.0139207	0.0324487	0.174424	0.107285	0.0680898	GeneID:101110924	PC-esterase domain containing 1B
PDGFRA	13794.6	18463.8	9125.37	0.494233	-1.01674	3.25667e-48	4.22509e-45	Down	27.6136	28.8008	30.5387	56.4684	60.1915	64.4424	GeneID:101106012	platelet derived growth factor receptor alpha	GO:0000165,GO:0001553,GO:0001701,GO:0001775,GO:0002244,GO:0004672,GO:0004714,GO:0004888,GO:0005018,GO:0005021,GO:0005088,GO:0005161,GO:0005524,GO:0005634,GO:0005737,GO:0005794,GO:0005886,GO:0005887,GO:0005902,GO:0005929,GO:0007204,GO:0008210,GO:0008284,GO:0009897,GO:0009968,GO:0010544,GO:0010863,GO:0014068,GO:0016020,GO:0016032,GO:0018108,GO:0023019,GO:0030054,GO:0030154,GO:0030198,GO:0030324,GO:…	MAPK cascade|luteinization|in utero embryonic development|cell activation|hematopoietic progenitor cell differentiation|protein kinase activity|transmembrane receptor protein tyrosine kinase activity|transmembrane signaling receptor activity|platelet-derived growth factor alpha-receptor activity|vascular endothelial growth factor-activated receptor activity|Ras guanyl-nucleotide exchange factor a…	oas01521,oas04010,oas04014,oas04015,oas04020,oas04072,oas04144,oas04151,oas04510,oas04540,oas04630,oas04810,oas05163,oas05200,oas05206,oas05214,oas05215,oas05218,oas05230,oas05231	EGFR tyrosine kinase inhibitor resistance|MAPK signaling pathway|Ras signaling pathway|Rap1 signaling pathway|Calcium signaling pathway|Phospholipase D signaling pathway|Endocytosis|PI3K-Akt signaling pathway|Focal adhesion|Gap junction|Jak-STAT signaling pathway|Regulation of actin cytoskeleton|Human cytomegalovirus infection|Pathways in cancer|MicroRNAs in cancer|Glioma|Prostate cancer|Melanoma…
PECAM1	23.9128	33.5609	14.2648	0.42469	-1.23552	0.0106263	0.0563748	Down	0.0903318	0.172064	0.081852	0.202625	0.230622	0.400766	GeneID:100303608	platelet and endothelial cell adhesion molecule 1	GO:0005886,GO:0007155,GO:0016021,GO:0030054,GO:0045121	plasma membrane|cell adhesion|integral component of membrane|cell junction|membrane raft	oas04514,oas04670,oas05144,oas05418	Cell adhesion molecules (CAMs)|Leukocyte transendothelial migration|Malaria|Fluid shear stress and atherosclerosis
PIK3AP1	13.2236	7.1695	19.2777	2.68973	1.42746	0.0239927	0.101783	Up	0.0756619	0.0621697	0.115341	0.0527126	0.013392	0.0304088	GeneID:101112273	phosphoinositide-3-kinase adaptor protein 1	GO:0005829,GO:0005886,GO:0014068,GO:0016020,GO:0034134,GO:0034142,GO:0034154,GO:0034162,GO:0036312,GO:0042802,GO:0046934,GO:0050727,GO:0051897	cytosol|plasma membrane|positive regulation of phosphatidylinositol 3-kinase signaling|membrane|toll-like receptor 2 signaling pathway|toll-like receptor 4 signaling pathway|toll-like receptor 7 signaling pathway|toll-like receptor 9 signaling pathway|phosphatidylinositol 3-kinase regulatory subunit binding|identical protein binding|phosphatidylinositol-4,5-bisphosphate 3-kinase activity|regulati…	oas04151,oas04662	PI3K-Akt signaling pathway|B cell receptor signaling pathway
PIWIL3	123.337	164.706	81.9671	0.497811	-1.00633	1.54645e-05	0.00027179	Down	0.557709	0.46145	0.623681	1.22843	1.38479	0.789975	GeneID:101116350	piwi like RNA-mediated gene silencing 3	GO:0003723,GO:0005737,GO:0006417,GO:0007275,GO:0007283,GO:0030154,GO:0031047,GO:0051321	RNA binding|cytoplasm|regulation of translation|multicellular organism development|spermatogenesis|cell differentiation|gene silencing by RNA|meiotic cell cycle
PLA2R1	3554.64	2067.83	5041.45	2.43803	1.28571	3.16886e-77	1.50743e-73	Up	19.3679	20.878	20.4209	8.16416	8.66964	8.79184	GeneID:101111081	phospholipase A2 receptor 1	GO:0001816,GO:0004888,GO:0005576,GO:0005886,GO:0006898,GO:0009986,GO:0016021,GO:0030246,GO:0038023,GO:0043235,GO:0043274,GO:0043517,GO:0072593,GO:0090238,GO:0090399,GO:0090403	cytokine production|transmembrane signaling receptor activity|extracellular region|plasma membrane|receptor-mediated endocytosis|cell surface|integral component of membrane|carbohydrate binding|signaling receptor activity|receptor complex|phospholipase binding|positive regulation of DNA damage response, signal transduction by p53 class mediator|reactive oxygen species metabolic process|positive r…	oas04145,oas05152	Phagosome|Tuberculosis
PLBD1	1062.22	1597.47	526.963	0.329877	-1.6	8.05316e-11	4.6529e-09	Down	6.69167	7.64466	7.80756	18.6024	20.0634	30.3453	GeneID:101108736	phospholipase B domain containing 1	GO:0005615,GO:0005764,GO:0016042,GO:0016787	extracellular space|lysosome|lipid catabolic process|hydrolase activity
PLCXD1	29.4075	39.7794	19.0356	0.478088	-1.06465	0.01572	0.0746061	Down	0.429354	0.409763	0.204673	1.08704	0.636592	0.528394	GeneID:101116550	phosphatidylinositol specific phospholipase C X domain containing 1	GO:0005737,GO:0006629,GO:0008081	cytoplasm|lipid metabolic process|phosphoric diester hydrolase activity
PLCXD3	445.001	612.051	277.952	0.454146	-1.13877	2.29798e-13	1.9405e-11	Down	1.12713	0.732535	0.961979	1.8847	2.56177	1.95804	GeneID:101102423	phosphatidylinositol specific phospholipase C X domain containing 3	GO:0007165,GO:0008081,GO:0016042	signal transduction|phosphoric diester hydrolase activity|lipid catabolic process
PLEKHD1	30.4813	17.9251	43.0376	2.40083	1.26353	0.00126687	0.0107744	Up	0.367878	0.287257	0.358707	0.142077	0.120318	0.171728	GeneID:101118957	pleckstrin homology and coiled-coil domain containing D1
PLXND1	434.857	267.052	602.662	2.25685	1.17431	1.38385e-17	1.89893e-15	Up	2.50374	2.2736	2.48334	1.31632	1.11609	0.882475	GeneID:101106801	plexin D1	GO:0001525,GO:0001569,GO:0002116,GO:0003151,GO:0003279,GO:0005886,GO:0005887,GO:0007162,GO:0007221,GO:0007416,GO:0008360,GO:0017154,GO:0019904,GO:0030027,GO:0030334,GO:0031258,GO:0032092,GO:0035904,GO:0043087,GO:0043542,GO:0045765,GO:0050772,GO:0060666,GO:0060976,GO:0071526,GO:1902287	angiogenesis|branching involved in blood vessel morphogenesis|semaphorin receptor complex|outflow tract morphogenesis|cardiac septum development|plasma membrane|integral component of plasma membrane|negative regulation of cell adhesion|positive regulation of transcription of Notch receptor target|synapse assembly|regulation of cell shape|semaphorin receptor activity|protein domain specific bindin…
PNPLA1	21.3349	34.5334	8.13642	0.235569	-2.08578	7.71406e-05	0.0010889	Down	0.146533	0.113714	0.129827	0.433873	0.408252	0.858144	GeneID:101120362	patatin like phospholipase domain containing 1	GO:0004806,GO:0005737,GO:0005811,GO:0016020,GO:0019433,GO:0055088	triglyceride lipase activity|cytoplasm|lipid droplet|membrane|triglyceride catabolic process|lipid homeostasis
PODN	191.9	310.06	73.7404	0.23779	-2.07224	0.000317578	0.00354352	Down	0.841329	0.810491	0.44339	2.11887	1.75558	5.18193	GeneID:101117801	podocan	GO:0005518,GO:0005615,GO:0005737,GO:0008285,GO:0030021,GO:0030336,GO:0062023	collagen binding|extracellular space|cytoplasm|negative regulation of cell proliferation|extracellular matrix structural constituent conferring compression resistance|negative regulation of cell migration|collagen-containing extracellular matrix
PPEF2	621.692	343.108	900.275	2.62399	1.39176	3.72853e-18	5.26831e-16	Up	6.40511	6.58546	6.16805	3.0324	2.87858	1.62291	GeneID:101107703	protein phosphatase with EF-hand domain 2	GO:0001750,GO:0001917,GO:0004722,GO:0005506,GO:0005509,GO:0005829,GO:0006470,GO:0007601,GO:0010801,GO:0030145,GO:0030544,GO:0031435,GO:0043405,GO:0043409,GO:0043506,GO:0050906,GO:0051879	photoreceptor outer segment|photoreceptor inner segment|protein serine/threonine phosphatase activity|iron ion binding|calcium ion binding|cytosol|protein dephosphorylation|visual perception|negative regulation of peptidyl-threonine phosphorylation|manganese ion binding|Hsp70 protein binding|mitogen-activated protein kinase kinase kinase binding|regulation of MAP kinase activity|negative regulati…
PRDM1	6.73028	10.7638	2.69672	0.251261	-1.99274	0.0303309	0.120438	Down	0.00999314	0.00498533	0.0249014	0.0838351	0.0551264	0.0243845	GeneID:101121017	PR/SET domain 1
PROSER2	16.1591	6.19038	26.1279	4.21853	2.07674	0.000431248	0.00452192	Up	0.281085	0.490793	0.308185	0.110969	0.0422887	0.109741	GeneID:101116497	proline and serine rich 2
PSMB9	38.6408	25.432	51.8496	2.03901	1.02787	0.00268477	0.0195881	Up	1.90356	1.71665	1.97032	0.794859	1.10149	0.928985	GeneID:101115834	proteasome subunit beta 9	GO:0002376,GO:0004175,GO:0004298,GO:0005634,GO:0005737,GO:0005829,GO:0005839,GO:0010498,GO:0010499,GO:0019774,GO:0043161,GO:1990111,GO:2000116	immune system process|endopeptidase activity|threonine-type endopeptidase activity|nucleus|cytoplasm|cytosol|proteasome core complex|proteasomal protein catabolic process|proteasomal ubiquitin-independent protein catabolic process|proteasome core complex, beta-subunit complex|proteasome-mediated ubiquitin-dependent protein catabolic process|spermatoproteasome complex|regulation of cysteine-type e…	oas03050	Proteasome
PTGS1	23.4168	34.9238	11.9097	0.340673	-1.55354	0.00816581	0.0459339	Down	0.178368	0.136092	0.0522901	0.362444	0.641938	0.112651	GeneID:443551	prostaglandin-endoperoxide synthase 1	GO:0001516,GO:0004601,GO:0004666,GO:0005737,GO:0005789,GO:0006954,GO:0006979,GO:0008144,GO:0008217,GO:0016021,GO:0019371,GO:0020037,GO:0031090,GO:0042803,GO:0043231,GO:0046872,GO:0051213	prostaglandin biosynthetic process|peroxidase activity|prostaglandin-endoperoxide synthase activity|cytoplasm|endoplasmic reticulum membrane|inflammatory response|response to oxidative stress|drug binding|regulation of blood pressure|integral component of membrane|cyclooxygenase pathway|heme binding|organelle membrane|protein homodimerization activity|intracellular membrane-bounded organelle|meta…	oas00590,oas04611,oas04726,oas04923	Arachidonic acid metabolism|Platelet activation|Serotonergic synapse|Regulation of lipolysis in adipocytes
PTHLH	14.604	7.17435	22.0337	3.07159	1.61899	0.00620645	0.0374513	Up	0.352765	0.404768	0.386776	0.0522255	0.1946	0.137727	GeneID:443135	parathyroid hormone like hormone	GO:0001501,GO:0002076,GO:0005179,GO:0005576,GO:0005654,GO:0005794,GO:0005829,GO:0007189,GO:0010468,GO:0030282,GO:0051428,GO:0061182	skeletal system development|osteoblast development|hormone activity|extracellular region|nucleoplasm|Golgi apparatus|cytosol|adenylate cyclase-activating G protein-coupled receptor signaling pathway|regulation of gene expression|bone mineralization|peptide hormone receptor binding|negative regulation of chondrocyte development	oas04928	Parathyroid hormone synthesis, secretion and action
PTX3	2840.94	1732.08	3949.79	2.28039	1.18928	3.43168e-41	2.72075e-38	Up	37.7	41.4527	38.8515	18.8398	19.2676	15.2339	GeneID:100034672	pentraxin 3	GO:0001849,GO:0005615,GO:0045087	complement component C1q binding|extracellular space|innate immune response
PVALB	7.5291	13.352	1.70619	0.127288	-2.97383	0.00451323	0.0291045	Down	0.14326	0.0357346	0	0.141394	0.359221	0.94385	GeneID:101122682	parvalbumin	GO:0005509,GO:0005634,GO:0005737,GO:0030424,GO:0051480	calcium ion binding|nucleus|cytoplasm|axon|regulation of cytosolic calcium ion concentration
RAI2	9.83782	16.6246	3.05107	0.183516	-2.44602	0.00120754	0.01035	Down	0.022413	0.0447251	0.0335098	0.22121	0.157359	0.185948	GeneID:101107764	retinoic acid induced 2	GO:0009792	embryo development ending in birth or egg hatching
RAMP1	15.5188	29.3447	1.6929	0.0577475	-4.1141	2.47203e-07	7.17039e-06	Down	0.0679148	0.033881	0.0676933	1.07248	1.05582	0.894892	GeneID:101110380	receptor activity modifying protein 1	GO:0001525,GO:0001635,GO:0005622,GO:0006816,GO:0006886,GO:0007186,GO:0007189,GO:0008277,GO:0008565,GO:0009986,GO:0015026,GO:0015031,GO:0031623,GO:0032870,GO:0043235,GO:0060050,GO:0072659,GO:0097643,GO:0097647,GO:0150056,GO:1990406,GO:1990407,GO:1990408	angiogenesis|calcitonin gene-related peptide receptor activity|intracellular|calcium ion transport|intracellular protein transport|G protein-coupled receptor signaling pathway|adenylate cyclase-activating G protein-coupled receptor signaling pathway|regulation of G protein-coupled receptor signaling pathway|protein transporter activity|cell surface|coreceptor activity|protein transport|receptor i…	oas04270	Vascular smooth muscle contraction
RAPGEF3	23.4221	32.5993	14.2448	0.436869	-1.19473	0.0101282	0.0544202	Down	0.0619377	0.162221	0.10032	0.28273	0.23296	0.249374	GeneID:101109786	Rap guanine nucleotide exchange factor 3	GO:0001525,GO:0005085,GO:0005622,GO:0005886,GO:0005902,GO:0007165,GO:0008283,GO:0012505,GO:0016020,GO:0017034,GO:0019904,GO:0019933,GO:0030027,GO:0030175,GO:0030552,GO:0032486,GO:0033138,GO:0034242,GO:0043547,GO:0045766,GO:0046827,GO:0050796,GO:0051496,GO:0060143,GO:0061028,GO:0070062,GO:0071320,GO:1901985,GO:2000249	angiogenesis|guanyl-nucleotide exchange factor activity|intracellular|plasma membrane|microvillus|signal transduction|cell proliferation|endomembrane system|membrane|Rap guanyl-nucleotide exchange factor activity|protein domain specific binding|cAMP-mediated signaling|lamellipodium|filopodium|cAMP binding|Rap protein signal transduction|positive regulation of peptidyl-serine phosphorylation|negat…	oas04015,oas04024,oas04072,oas04261,oas04670,oas04720,oas04726	Rap1 signaling pathway|cAMP signaling pathway|Phospholipase D signaling pathway|Adrenergic signaling in cardiomyocytes|Leukocyte transendothelial migration|Long-term potentiation|Serotonergic synapse
RARRES1	1027.9	1589.31	466.489	0.293472	-1.76871	7.21068e-44	6.86024e-41	Down	14.7456	11.1815	10.8761	38.8711	40.416	49.8241	GeneID:101107654	retinoic acid receptor responder 1
RASL12	48.6577	26.0951	71.2203	2.72959	1.44868	2.40308e-05	0.000401104	Up	0.901509	0.642487	0.706018	0.211849	0.419807	0.21998	GeneID:101118025	RAS like family 12	GO:0003924,GO:0005525,GO:0007165,GO:0016020	GTPase activity|GTP binding|signal transduction|membrane
RBM20	128.08	73.0108	183.148	2.50804	1.32656	2.6114e-10	1.39057e-08	Up	0.854447	0.70208	0.701367	0.260436	0.298269	0.367934	GeneID:101119433	RNA binding motif protein 20	GO:0003723,GO:0005634,GO:0006397,GO:0007507,GO:0008270,GO:0008380,GO:0033120	RNA binding|nucleus|mRNA processing|heart development|zinc ion binding|RNA splicing|positive regulation of RNA splicing
RBM38	51.0807	71.7094	30.4521	0.424954	-1.23462	0.000124641	0.00163639	Down	0.392435	0.274087	0.508502	1.05868	0.787214	0.995896	GeneID:101104417	RNA binding motif protein 38	GO:0003723,GO:0003729,GO:0003730,GO:0005634,GO:0005829,GO:0006397,GO:0006977,GO:0006978,GO:0007049,GO:0007050,GO:0008285,GO:0008380,GO:0010830,GO:0030154,GO:0043484,GO:0070935,GO:1990904	RNA binding|mRNA binding|mRNA 3'-UTR binding|nucleus|cytosol|mRNA processing|DNA damage response, signal transduction by p53 class mediator resulting in cell cycle arrest|DNA damage response, signal transduction by p53 class mediator resulting in transcription of p21 class mediator|cell cycle|cell cycle arrest|negative regulation of cell proliferation|RNA splicing|regulation of myotube differenti…
REM1	701.882	942.524	461.241	0.489359	-1.03103	0.00708205	0.0414043	Down	9.28953	9.5099	8.55624	12.9274	15.0572	29.463	GeneID:100302062	RRAD and GEM like GTPase 1	GO:0003924,GO:0005516,GO:0005525,GO:0005886,GO:0007165,GO:1901842	GTPase activity|calmodulin binding|GTP binding|plasma membrane|signal transduction|negative regulation of high voltage-gated calcium channel activity
REXO5	29.7356	39.7864	19.6848	0.494562	-1.01578	0.0108667	0.0571612	Down	0.115421	0.139406	0.09688	0.227836	0.304648	0.201597	GeneID:101121819	RNA exonuclease 5	GO:0003723,GO:0004527,GO:0005730	RNA binding|exonuclease activity|nucleolus	oas03008	Ribosome biogenesis in eukaryotes
RIC3	34.8767	18.9082	50.8453	2.68906	1.4271	9.43446e-05	0.00129585	Up	0.165333	0.197953	0.186766	0.0761502	0.0663306	0.0681354	GeneID:101108250	RIC3 acetylcholine receptor chaperone	GO:0000139,GO:0005789,GO:0007204,GO:0007271,GO:0016021,GO:0033130,GO:0034394,GO:0034622,GO:0043005,GO:0043025,GO:0043231,GO:0044183	Golgi membrane|endoplasmic reticulum membrane|positive regulation of cytosolic calcium ion concentration|synaptic transmission, cholinergic|integral component of membrane|acetylcholine receptor binding|protein localization to cell surface|cellular protein-containing complex assembly|neuron projection|neuronal cell body|intracellular membrane-bounded organelle|protein binding involved in protein f…
RIMS3	181.975	260.5	103.449	0.39704	-1.33264	1.80059e-13	1.5387e-11	Down	0.361576	0.485025	0.376414	0.943711	1.17259	1.05875	GeneID:101102435	regulating synaptic membrane exocytosis 3	GO:0017137,GO:0017156,GO:0030054,GO:0042391,GO:0042734,GO:0044325,GO:0045202,GO:0048167,GO:0048786,GO:0048788,GO:0048791,GO:0050806,GO:0098831,GO:2000300	Rab GTPase binding|calcium ion regulated exocytosis|cell junction|regulation of membrane potential|presynaptic membrane|ion channel binding|synapse|regulation of synaptic plasticity|presynaptic active zone|cytoskeleton of presynaptic active zone|calcium ion-regulated exocytosis of neurotransmitter|positive regulation of synaptic transmission|presynaptic active zone cytoplasmic component|regulatio…
RIPOR2	227.903	365.821	89.9841	0.246149	-2.0224	2.60091e-23	6.18627e-21	Down	0.299601	0.283194	0.463653	1.81699	1.35618	1.20049	GeneID:101117024	RHO family interacting cell polarization regulator 2	GO:0005737,GO:0005856,GO:0006935,GO:0007155,GO:0007162,GO:0007605,GO:0016324,GO:0030175,GO:0032420,GO:0035024,GO:0045663,GO:0048741,GO:0051491,GO:0060171,GO:0071889,GO:0090023,GO:1901741,GO:1903904,GO:1905872,GO:1990869,GO:2000114,GO:2000391,GO:2000405,GO:2001107	cytoplasm|cytoskeleton|chemotaxis|cell adhesion|negative regulation of cell adhesion|sensory perception of sound|apical plasma membrane|filopodium|stereocilium|negative regulation of Rho protein signal transduction|positive regulation of myoblast differentiation|skeletal muscle fiber development|positive regulation of filopodium assembly|stereocilium membrane|14-3-3 protein binding|positive regul…
RNF157	70.6327	96.1744	45.0909	0.468822	-1.09289	4.33337e-05	0.000656492	Down	0.199827	0.244238	0.219093	0.586742	0.435922	0.433968	GeneID:101117601	ring finger protein 157	GO:0005737,GO:0016740,GO:0046872	cytoplasm|transferase activity|metal ion binding
RNF180	22.9166	14.673	31.1602	2.12422	1.08693	0.0176812	0.0811085	Up	0.3102	0.57258	0.54108	0.214311	0.264458	0.21194	GeneID:101105601	ring finger protein 180	GO:0000209,GO:0005635,GO:0016021,GO:0030534,GO:0031227,GO:0031398,GO:0031624,GO:0032436,GO:0042415,GO:0042428,GO:0046872,GO:0050790,GO:0061630	protein polyubiquitination|nuclear envelope|integral component of membrane|adult behavior|intrinsic component of endoplasmic reticulum membrane|positive regulation of protein ubiquitination|ubiquitin conjugating enzyme binding|positive regulation of proteasomal ubiquitin-dependent protein catabolic process|norepinephrine metabolic process|serotonin metabolic process|metal ion binding|regulation o…
RNF186	24.1347	13.3619	34.9075	2.61223	1.38528	0.00311948	0.021844	Up	0.631348	0.611401	0.666305	0.109963	0.279367	0.362487	GeneID:101104644	ring finger protein 186	GO:0004842,GO:0005789,GO:0016021,GO:0035519,GO:0043161,GO:0046872,GO:0051865,GO:0061630,GO:0070059,GO:0070534,GO:0070585	ubiquitin-protein transferase activity|endoplasmic reticulum membrane|integral component of membrane|protein K29-linked ubiquitination|proteasome-mediated ubiquitin-dependent protein catabolic process|metal ion binding|protein autoubiquitination|ubiquitin protein ligase activity|intrinsic apoptotic signaling pathway in response to endoplasmic reticulum stress|protein K63-linked ubiquitination|pro…
RNF227	6.40547	10.1142	2.69672	0.267366	-1.90311	0.0472389	0.165313	Down	0.0306152	0.0152732	0.0762884	0.241731	0.18424	0.044823	GeneID:101120178	ring finger protein 227	GO:0046872	metal ion binding
RPL3L	17.5025	24.1261	10.879	0.45043	-1.15062	0.0363017	0.136836	Down	0.132163	0.296698	0.0987988	0.293492	0.480521	0.435367	GeneID:101112108	ribosomal protein L3 like	GO:0000027,GO:0003735,GO:0005840,GO:0006412	ribosomal large subunit assembly|structural constituent of ribosome|ribosome|translation	oas03010	Ribosome
S100A2	102.142	59.6393	144.645	2.42595	1.27855	3.58022e-05	0.000560848	Up	4.44485	6.62679	10.7449	1.96656	3.07456	4.1888	GeneID:101105293	S100 calcium binding protein A2	GO:0005509,GO:0042802,GO:0043542,GO:0046914	calcium ion binding|identical protein binding|endothelial cell migration|transition metal ion binding
S100A8	1.84363	0	3.68725	20.5238	4.35922	0.0362283	0.136632	Up	0	0.0602733	0.602121	0	0	0	GeneID:101104026	S100 calcium binding protein A8	GO:0002523,GO:0002793,GO:0005509,GO:0005615,GO:0005829,GO:0005886,GO:0006914,GO:0006915,GO:0006919,GO:0008017,GO:0008270,GO:0014002,GO:0016209,GO:0018119,GO:0030593,GO:0035662,GO:0045087,GO:0045111,GO:0050544,GO:0050729,GO:0050786,GO:0070488,GO:2001244	leukocyte migration involved in inflammatory response|positive regulation of peptide secretion|calcium ion binding|extracellular space|cytosol|plasma membrane|autophagy|apoptotic process|activation of cysteine-type endopeptidase activity involved in apoptotic process|microtubule binding|zinc ion binding|astrocyte development|antioxidant activity|peptidyl-cysteine S-nitrosylation|neutrophil chemot…	oas04657	IL-17 signaling pathway
SBK1	85.5605	47.8922	123.229	2.57197	1.36288	2.74108e-06	6.17977e-05	Up	0.768811	0.589281	0.487186	0.221106	0.163413	0.352836	GeneID:101120982	SH3 domain binding kinase 1	GO:0004674,GO:0005524,GO:0005737,GO:0018105,GO:0018107	protein serine/threonine kinase activity|ATP binding|cytoplasm|peptidyl-serine phosphorylation|peptidyl-threonine phosphorylation
SCAMP5	18.6428	9.4583	27.8272	2.94194	1.55677	0.00356218	0.0241845	Up	0.145225	0.305049	0.175225	0.0603507	0.099661	0.0596829	GeneID:101118994	secretory carrier membrane protein 5	GO:0000139,GO:0005794,GO:0005886,GO:0006887,GO:0015031,GO:0016021,GO:0030054,GO:0030672,GO:0032588,GO:0034976,GO:0044877,GO:0045806,GO:0045956,GO:0050715,GO:0055038	Golgi membrane|Golgi apparatus|plasma membrane|exocytosis|protein transport|integral component of membrane|cell junction|synaptic vesicle membrane|trans-Golgi network membrane|response to endoplasmic reticulum stress|protein-containing complex binding|negative regulation of endocytosis|positive regulation of calcium ion-dependent exocytosis|positive regulation of cytokine secretion|recycling endo…
SCG3	21.9663	11.7414	32.1913	2.74234	1.45541	0.00459442	0.0294816	Up	0.437764	0.303319	0.412096	0.252036	0.121964	0.0593445	GeneID:101104667	secretogranin III	GO:0005576,GO:0030658	extracellular region|transport vesicle membrane
SCN2A	81.138	51.1431	111.133	2.17266	1.11946	0.000155395	0.00197124	Up	0.302419	0.2932	0.338401	0.121081	0.091569	0.228344	GeneID:101103126	sodium voltage-gated channel alpha subunit 2	GO:0001518,GO:0005244,GO:0005248,GO:0005622,GO:0005886,GO:0005887,GO:0006814,GO:0008627,GO:0014704,GO:0019228,GO:0030315,GO:0030424,GO:0031226,GO:0033268,GO:0033270,GO:0034706,GO:0034765,GO:0035725,GO:0042552,GO:0051402,GO:0086010,GO:0098978,GO:0099056	voltage-gated sodium channel complex|voltage-gated ion channel activity|voltage-gated sodium channel activity|intracellular|plasma membrane|integral component of plasma membrane|sodium ion transport|intrinsic apoptotic signaling pathway in response to osmotic stress|intercalated disc|neuronal action potential|T-tubule|axon|intrinsic component of plasma membrane|node of Ranvier|paranode region of …	oas04742	Taste transduction
SCN8A	229.92	113.102	346.738	3.06553	1.61614	4.43164e-22	9.16578e-20	Up	0.758276	0.865343	0.849976	0.22954	0.269712	0.331042	GeneID:101113744	sodium voltage-gated channel alpha subunit 8	GO:0001518,GO:0005244,GO:0005248,GO:0005524,GO:0005886,GO:0006814,GO:0007399,GO:0007422,GO:0016021,GO:0019228,GO:0030018,GO:0030424,GO:0031410,GO:0033268,GO:0034765,GO:0035725,GO:0042552,GO:0043194,GO:0086010	voltage-gated sodium channel complex|voltage-gated ion channel activity|voltage-gated sodium channel activity|ATP binding|plasma membrane|sodium ion transport|nervous system development|peripheral nervous system development|integral component of membrane|neuronal action potential|Z disc|axon|cytoplasmic vesicle|node of Ranvier|regulation of ion transmembrane transport|sodium ion transmembrane tra…
SELPLG	24.6546	14.3491	34.9601	2.43601	1.28452	0.00442851	0.0287269	Up	0.214328	0.287356	0.186926	0.066105	0.134355	0.091523	GeneID:101102589	selectin P ligand			oas04514,oas05150	Cell adhesion molecules (CAMs)|Staphylococcus aureus infection
SEMA3G	96.5646	60.3346	132.795	2.20133	1.13838	0.000173944	0.00216421	Up	0.962521	0.534882	0.886517	0.547141	0.360495	0.20811	GeneID:101111838	semaphorin 3G	GO:0001755,GO:0005102,GO:0005615,GO:0005887,GO:0030215,GO:0030335,GO:0030517,GO:0038191,GO:0045499,GO:0048843,GO:0050919,GO:0070062,GO:0071526	neural crest cell migration|signaling receptor binding|extracellular space|integral component of plasma membrane|semaphorin receptor binding|positive regulation of cell migration|negative regulation of axon extension|neuropilin binding|chemorepellent activity|negative regulation of axon extension involved in axon guidance|negative chemotaxis|extracellular exosome|semaphorin-plexin signaling pathw…	oas04360	Axon guidance
SEMA4D	164.728	240.553	88.9042	0.369431	-1.43662	8.91766e-14	8.14264e-12	Down	0.34888	0.265998	0.246044	0.802366	0.71635	0.880225	GeneID:101104121	semaphorin 4D	GO:0000122,GO:0001755,GO:0001934,GO:0004888,GO:0005102,GO:0005615,GO:0005887,GO:0007162,GO:0008360,GO:0010693,GO:0014068,GO:0016020,GO:0030215,GO:0030335,GO:0031344,GO:0038023,GO:0038191,GO:0042802,GO:0043547,GO:0043931,GO:0045499,GO:0045668,GO:0048672,GO:0048814,GO:0048843,GO:0050731,GO:0050732,GO:0050772,GO:0050919,GO:0070486,GO:0071526,GO:1900220	negative regulation of transcription by RNA polymerase II|neural crest cell migration|positive regulation of protein phosphorylation|transmembrane signaling receptor activity|signaling receptor binding|extracellular space|integral component of plasma membrane|negative regulation of cell adhesion|regulation of cell shape|negative regulation of alkaline phosphatase activity|positive regulation of p…	oas04360	Axon guidance
SERPINI1	1555.85	992.92	2118.78	2.13401	1.09357	2.88755e-23	6.75544e-21	Up	14.6301	17.8529	18.8179	8.65561	9.1835	6.9313	GeneID:101122566	serpin family I member 1	GO:0004867,GO:0005615,GO:0007417,GO:0007422,GO:0010951,GO:0010976,GO:0030155,GO:0034774,GO:0043025,GO:0043204,GO:0060205,GO:0070062	serine-type endopeptidase inhibitor activity|extracellular space|central nervous system development|peripheral nervous system development|negative regulation of endopeptidase activity|positive regulation of neuron projection development|regulation of cell adhesion|secretory granule lumen|neuronal cell body|perikaryon|cytoplasmic vesicle lumen|extracellular exosome
SFRP1	959.582	1493.35	425.818	0.285126	-1.81033	1.11309e-08	4.30487e-07	Down	3.62264	2.5184	2.04657	8.01572	9.22794	12.3373	GeneID:101121066	secreted frizzled related protein 1	GO:0001954,GO:0005109,GO:0005615,GO:0005886,GO:0007275,GO:0017147,GO:0030036,GO:0034446,GO:0035567,GO:0043547,GO:0045765,GO:0051496,GO:0051894,GO:0060070,GO:0090090	positive regulation of cell-matrix adhesion|frizzled binding|extracellular space|plasma membrane|multicellular organism development|Wnt-protein binding|actin cytoskeleton organization|substrate adhesion-dependent cell spreading|non-canonical Wnt signaling pathway|positive regulation of GTPase activity|regulation of angiogenesis|positive regulation of stress fiber assembly|positive regulation of f…	oas04310	Wnt signaling pathway
SFRP5	47.7585	26.7515	68.7654	2.57148	1.3626	0.000147624	0.00188776	Up	1.20359	0.917343	1.26631	0.560959	0.586826	0.212111	GeneID:101109845	secreted frizzled related protein 5	GO:0005615,GO:0007275,GO:0008285,GO:0017147,GO:0030154,GO:0030178,GO:0030510,GO:0035567,GO:0043433,GO:0051898,GO:0060070,GO:0090090,GO:2000057	extracellular space|multicellular organism development|negative regulation of cell proliferation|Wnt-protein binding|cell differentiation|negative regulation of Wnt signaling pathway|regulation of BMP signaling pathway|non-canonical Wnt signaling pathway|negative regulation of DNA-binding transcription factor activity|negative regulation of protein kinase B signaling|canonical Wnt signaling pathw…	oas04310	Wnt signaling pathway
SHISAL1	13.4549	5.53896	21.3709	3.85651	1.94729	0.00162441	0.0131758	Up	0.0794843	0.114552	0.0836264	0.0217913	0.0177159	0.0344803	GeneID:101107952	shisa like 1	GO:0016021	integral component of membrane
SHOC1	9.05023	4.56414	13.5363	2.96704	1.56902	0.0287238	0.115638	Up	0.0553652	0.0602626	0.0852853	0.0198705	0.0252411	0.0245633	GeneID:101121404	shortage in chiasmata 1	GO:0000712,GO:0000794,GO:0003697,GO:0016887	resolution of meiotic recombination intermediates|condensed nuclear chromosome|single-stranded DNA binding|ATPase activity
SI	6.79793	0	13.5959	75.5396	6.23916	7.92022e-06	0.000153174	Up	0.076315	0.0761433	0.038033	0	0	0	GeneID:101102774	sucrase-isomaltase	GO:0004558,GO:0004574,GO:0004575,GO:0005794,GO:0005886,GO:0005903,GO:0005975,GO:0016021,GO:0016324,GO:0030246,GO:0044245,GO:0070062	alpha-1,4-glucosidase activity|oligo-1,6-glucosidase activity|sucrose alpha-glucosidase activity|Golgi apparatus|plasma membrane|brush border|carbohydrate metabolic process|integral component of membrane|apical plasma membrane|carbohydrate binding|polysaccharide digestion|extracellular exosome	oas00052,oas00500,oas04973	Galactose metabolism|Starch and sucrose metabolism|Carbohydrate digestion and absorption
SLAMF1	3.76613	6.51521	1.01704	0.15607	-2.67973	0.0335167	0.129492	Down	0.0269643	0.0269036	0.0268763	0.106452	0.135224	0.289503	GeneID:678672	signaling lymphocytic activation molecule family member 1	GO:0001779,GO:0001787,GO:0002232,GO:0002725,GO:0009897,GO:0010759,GO:0016021,GO:0016032,GO:0031338,GO:0035744,GO:0038023,GO:0042104,GO:0042802,GO:0045087,GO:0045335,GO:0050790,GO:1902714,GO:1902715,GO:2000510	natural killer cell differentiation|natural killer cell proliferation|leukocyte chemotaxis involved in inflammatory response|negative regulation of T cell cytokine production|external side of plasma membrane|positive regulation of macrophage chemotaxis|integral component of membrane|viral process|regulation of vesicle fusion|T-helper 1 cell cytokine production|signaling receptor activity|positive…	oas05162	Measles
SLAMF7	220.57	307.802	133.339	0.433092	-1.20726	1.12289e-11	7.4534e-10	Down	1.95435	1.76297	1.53436	4.96755	4.13519	3.397	GeneID:101121221	SLAM family member 7	GO:0002250,GO:0005886,GO:0007155,GO:0016021,GO:0030101,GO:0042267,GO:0042802,GO:0050776	adaptive immune response|plasma membrane|cell adhesion|integral component of membrane|natural killer cell activation|natural killer cell mediated cytotoxicity|identical protein binding|regulation of immune response
SLAMF9	7.75651	2.60554	12.9075	4.94986	2.30739	0.0134397	0.0665734	Up	0.808928	0.129137	0.290264	0.0319356	0.0649074	0.157911	GeneID:101123601	SLAM family member 9	GO:0016021	integral component of membrane
SLC25A21	5.54796	2.28377	8.81215	3.86026	1.9487	0.0390409	0.144265	Up	0.097576	0.109526	0.109415	0.0361143	0.0367003	0.0119049	GeneID:101121458	solute carrier family 25 member 21	GO:0005743,GO:0016021,GO:0022857	mitochondrial inner membrane|integral component of membrane|transmembrane transporter activity
SLC29A4	4.4298	7.50131	1.35829	0.180907	-2.46668	0.0342174	0.131533	Down	0.0240501	0.011998	0.0119858	0.166158	0.0723658	0.0352112	GeneID:101108981	solute carrier family 29 member 4	GO:0005337,GO:0005886,GO:0008504,GO:0016021,GO:0016324	nucleoside transmembrane transporter activity|plasma membrane|monoamine transmembrane transporter activity|integral component of membrane|apical plasma membrane
SLC2A12	183.811	101.709	265.914	2.61411	1.38632	5.89091e-15	5.92037e-13	Up	2.0227	2.50184	2.01611	0.775443	0.88024	0.921866	GeneID:101107449	solute carrier family 2 member 12	GO:0005351,GO:0005355,GO:0005887,GO:0008645,GO:0012505	carbohydrate:proton symporter activity|glucose transmembrane transporter activity|integral component of plasma membrane|hexose transmembrane transport|endomembrane system
SLC2A3	4359.75	6116.92	2602.59	0.425473	-1.23286	2.43156e-56	5.78348e-53	Down	19.0599	18.3233	18.7059	46.4583	49.253	40.1503	GeneID:443308	solute carrier family 2 member 3	GO:0002080,GO:0005355,GO:0005536,GO:0005887,GO:0016021,GO:0033300,GO:0042995,GO:0043204,GO:0055056,GO:1904659	acrosomal membrane|glucose transmembrane transporter activity|glucose binding|integral component of plasma membrane|integral component of membrane|dehydroascorbic acid transmembrane transporter activity|cell projection|perikaryon|D-glucose transmembrane transporter activity|glucose transmembrane transport
SLC2A9	14.8396	21.8638	7.81541	0.357223	-1.4851	0.0321296	0.125416	Down	0.224981	0.0280593	0.0700771	0.29144	0.507718	0.137245	GeneID:101104402	solute carrier family 2 member 9	GO:0008643,GO:0016021,GO:0022857	carbohydrate transport|integral component of membrane|transmembrane transporter activity
SLC36A2	26.2708	8.47398	44.0677	5.19952	2.37838	1.95047e-07	5.79677e-06	Up	0.580427	0.503584	0.55338	0.112082	0.0885895	0.123158	GeneID:101105748	solute carrier family 36 member 2	GO:0003333,GO:0005280,GO:0005737,GO:0005886,GO:0006811,GO:0006865,GO:0015078,GO:0015171,GO:0015180,GO:0015187,GO:0015193,GO:0015808,GO:0015816,GO:0016021,GO:0035524,GO:0070062,GO:1902600	amino acid transmembrane transport|amino acid:proton symporter activity|cytoplasm|plasma membrane|ion transport|amino acid transport|proton transmembrane transporter activity|amino acid transmembrane transporter activity|L-alanine transmembrane transporter activity|glycine transmembrane transporter activity|L-proline transmembrane transporter activity|L-alanine transport|glycine transport|integra…
SLC36A3	10.6069	2.93341	18.2804	6.23267	2.63985	0.000372078	0.00403183	Up	0.211472	0.186174	0.272777	0.0491099	0.0249534	0.0364249	GeneID:101111548	solute carrier family 36 member 3	GO:0003333,GO:0005280,GO:0015078,GO:0015171,GO:0015180,GO:0015187,GO:0015193,GO:0015808,GO:0015816,GO:0016021,GO:0035524,GO:1902600	amino acid transmembrane transport|amino acid:proton symporter activity|proton transmembrane transporter activity|amino acid transmembrane transporter activity|L-alanine transmembrane transporter activity|glycine transmembrane transporter activity|L-proline transmembrane transporter activity|L-alanine transport|glycine transport|integral component of membrane|proline transmembrane transport|proto…
SLC39A8	746.116	403.121	1089.11	2.70159	1.43381	8.50488e-27	2.58241e-24	Up	9.29504	9.63962	10.4422	3.47977	3.02187	4.67476	GeneID:101108488	solute carrier family 39 member 8	GO:0005385,GO:0005886,GO:0005887,GO:0006829,GO:0006882,GO:0031090,GO:0070574,GO:0071578	zinc ion transmembrane transporter activity|plasma membrane|integral component of plasma membrane|zinc ion transport|cellular zinc ion homeostasis|organelle membrane|cadmium ion transmembrane transport|zinc ion import across plasma membrane	oas04216	Ferroptosis
SLC4A8	33.8703	18.5878	49.1529	2.64464	1.40307	0.000510128	0.00515658	Up	0.164605	0.151096	0.160786	0.0974761	0.0528308	0.0353458	GeneID:101114004	solute carrier family 4 member 8	GO:0005452,GO:0005886,GO:0005887,GO:0008510,GO:0015301,GO:0015701,GO:0032809,GO:0043005,GO:0051453	inorganic anion exchanger activity|plasma membrane|integral component of plasma membrane|sodium:bicarbonate symporter activity|anion:anion antiporter activity|bicarbonate transport|neuronal cell body membrane|neuron projection|regulation of intracellular pH
SLC51B	6.92137	1.30322	12.5395	9.61814	3.26576	0.00146493	0.0121688	Up	0.119847	0.0398591	0.0862737	0.00657142	0.00667804	0.0129974	GeneID:101118277	solute carrier family 51 beta subunit	GO:0005886,GO:0015125,GO:0015721,GO:0016021,GO:0016323,GO:0031647,GO:0032782,GO:0032991,GO:0046982,GO:0060050,GO:0070863,GO:0090314	plasma membrane|bile acid transmembrane transporter activity|bile acid and bile salt transport|integral component of membrane|basolateral plasma membrane|regulation of protein stability|bile acid secretion|protein-containing complex|protein heterodimerization activity|positive regulation of protein glycosylation|positive regulation of protein exit from endoplasmic reticulum|positive regulation of…	oas04976	Bile secretion
SLC6A2	55.5209	76.3232	34.7186	0.45444	-1.13784	0.00291312	0.0207762	Down	0.227734	0.185487	0.0602221	0.334857	0.480135	0.263107	GeneID:101116078	solute carrier family 6 member 2	GO:0005328,GO:0005330,GO:0005334,GO:0005886,GO:0005887,GO:0015874,GO:0032809,GO:0042734,GO:0043005,GO:0046872,GO:0051583	neurotransmitter:sodium symporter activity|dopamine:sodium symporter activity|norepinephrine:sodium symporter activity|plasma membrane|integral component of plasma membrane|norepinephrine transport|neuronal cell body membrane|presynaptic membrane|neuron projection|metal ion binding|dopamine uptake involved in synaptic transmission	oas04721	Synaptic vesicle cycle
SLC7A7	441.865	639.716	244.013	0.38147	-1.39036	6.75808e-24	1.66284e-21	Down	3.03899	2.30262	2.86966	8.28783	7.51704	6.36732	GeneID:101105078	solute carrier family 7 member 7	GO:0000821,GO:0005886,GO:0005887,GO:0006520,GO:0015174,GO:0015179,GO:0016323,GO:0050900,GO:0065003	regulation of arginine metabolic process|plasma membrane|integral component of plasma membrane|cellular amino acid metabolic process|basic amino acid transmembrane transporter activity|L-amino acid transmembrane transporter activity|basolateral plasma membrane|leukocyte migration|protein-containing complex assembly	oas04974	Protein digestion and absorption
SLCO2A1	22.6255	30.9862	14.2648	0.460093	-1.12	0.0264173	0.108992	Down	0.0930461	0.177234	0.0843115	0.367336	0.288456	0.140355	GeneID:654334	solute carrier organic anion transporter family member 2A1
SLCO5A1	3.37102	0.652865	6.08917	9.33901	3.22327	0.0249995	0.104745	Up	0.021454	0.00917388	0.0244389	0.00302493	0.00307401	0	GeneID:101103733	solute carrier organic anion transporter family member 5A1	GO:0005887,GO:0015347,GO:0043252	integral component of plasma membrane|sodium-independent organic anion transmembrane transporter activity|sodium-independent organic anion transport
SLITRK5	16.4102	10.1044	22.716	2.24787	1.16856	0.0316313	0.124048	Up	0.0936172	0.116758	0.102643	0.0230994	0.056338	0.0639626	GeneID:101104763	SLIT and NTRK like family member 5	GO:0005886,GO:0007268,GO:0007409,GO:0007625,GO:0009410,GO:0016021,GO:0021756,GO:0030534,GO:0043235,GO:0043588,GO:0048813,GO:0051965,GO:0072358	plasma membrane|chemical synaptic transmission|axonogenesis|grooming behavior|response to xenobiotic stimulus|integral component of membrane|striatum development|adult behavior|receptor complex|skin development|dendrite morphogenesis|positive regulation of synapse assembly|cardiovascular system development
SNED1	7.89292	12.728	3.05784	0.240021	-2.05877	0.017463	0.0804436	Down	0.0175001	0.0069843	0.00697721	0.0345443	0.0807409	0.0204972	GeneID:105601932	sushi, nidogen and EGF like domains 1	GO:0005509,GO:0005576,GO:0007160	calcium ion binding|extracellular region|cell-matrix adhesion
SPON1	492.059	824.562	159.556	0.193482	-2.36973	1.97265e-12	1.50544e-10	Down	1.18512	0.685716	0.668839	3.62655	4.2173	5.67277	GeneID:101118982	spondin 1	GO:0005576,GO:0007155,GO:0010954,GO:0032092,GO:0046872,GO:0050693,GO:1902430,GO:1902993	extracellular region|cell adhesion|positive regulation of protein processing|positive regulation of protein binding|metal ion binding|LBD domain binding|negative regulation of amyloid-beta formation|positive regulation of amyloid precursor protein catabolic process
SPRY3	226.862	149.973	303.751	2.0257	1.01842	5.04151e-08	1.71712e-06	Up	1.43468	1.68239	1.99973	0.631838	1.03193	0.93727	GeneID:101106569	sprouty RTK signaling antagonist 3	GO:0005829,GO:0007275,GO:0016020,GO:0040037,GO:0043407,GO:0046580,GO:0061564	cytosol|multicellular organism development|membrane|negative regulation of fibroblast growth factor receptor signaling pathway|negative regulation of MAP kinase activity|negative regulation of Ras protein signal transduction|axon development
SRGN	684.229	455.429	913.029	2.0047	1.00339	4.09219e-24	1.02455e-21	Up	19.9668	21.3629	20.2901	9.95516	10.8524	10.8519	GeneID:101107327	serglycin	GO:0002576,GO:0005576,GO:0005615,GO:0005794,GO:0008626,GO:0016485,GO:0030502,GO:0031093,GO:0031214,GO:0033364,GO:0033371,GO:0033373,GO:0033382,GO:0042629,GO:0050710	platelet degranulation|extracellular region|extracellular space|Golgi apparatus|granzyme-mediated apoptotic signaling pathway|protein processing|negative regulation of bone mineralization|platelet alpha granule lumen|biomineral tissue development|mast cell secretory granule organization|T cell secretory granule organization|maintenance of protease location in mast cell secretory granule|maintenan…
STC1	426.205	594.692	257.718	0.43338	-1.2063	0.00361121	0.0244709	Down	1.79919	1.60541	2.15052	5.47883	5.51637	2.22725	GeneID:101112949	stanniocalcin 1	GO:0001886,GO:0003421,GO:0005179,GO:0005615,GO:0005634,GO:0005737,GO:0006874,GO:0010596,GO:0035988,GO:0044070,GO:0051926,GO:0086004,GO:0090280,GO:1903403	endothelial cell morphogenesis|growth plate cartilage axis specification|hormone activity|extracellular space|nucleus|cytoplasm|cellular calcium ion homeostasis|negative regulation of endothelial cell migration|chondrocyte proliferation|regulation of anion transport|negative regulation of calcium ion transport|regulation of cardiac muscle cell contraction|positive regulation of calcium ion import…
STOX2	13.2998	4.88699	21.7126	4.44056	2.15074	0.000685941	0.00655664	Up	0.0601115	0.0438289	0.0437844	0.0114093	0.00695665	0.0157963	GeneID:101108452	storkhead box 2	GO:0001893,GO:0009617,GO:0009792	maternal placenta development|response to bacterium|embryo development ending in birth or egg hatching
STPG1	89.4417	53.4713	125.412	2.34555	1.22993	2.21792e-07	6.49938e-06	Up	0.966025	0.771082	0.905815	0.331938	0.444981	0.38414	GeneID:101117651	sperm tail PG-rich repeat containing 1	GO:0005634,GO:0005739,GO:0043065,GO:0090073,GO:1902110	nucleus|mitochondrion|positive regulation of apoptotic process|positive regulation of protein homodimerization activity|positive regulation of mitochondrial membrane permeability involved in apoptotic process
SULT4A1	32.6356	21.1842	44.0869	2.08064	1.05703	0.00531529	0.0332258	Up	0.439674	0.588761	0.472837	0.216973	0.220493	0.304918	GeneID:101107692	sulfotransferase family 4A member 1	GO:0004062,GO:0005829,GO:0008146,GO:0008202,GO:0042802,GO:0050427	aryl sulfotransferase activity|cytosol|sulfotransferase activity|steroid metabolic process|identical protein binding|3'-phosphoadenosine 5'-phosphosulfate metabolic process
SUSD4	16.6386	7.16807	26.1091	3.64119	1.86441	0.0011771	0.0101523	Up	0.332526	0.161149	0.236744	0.0468848	0.0571746	0.102005	GeneID:101108067	sushi domain containing 4	GO:0016021,GO:0030449,GO:0045957,GO:0045959	integral component of membrane|regulation of complement activation|negative regulation of complement activation, alternative pathway|negative regulation of complement activation, classical pathway
SYT12	15.2391	9.45489	21.0233	2.22342	1.15278	0.0353976	0.134573	Up	0.14392	0.157956	0.14345	0.0426134	0.0866096	0.0772601	GeneID:101118234	synaptotagmin 12	GO:0000149,GO:0001786,GO:0005509,GO:0005544,GO:0005886,GO:0014059,GO:0016021,GO:0016192,GO:0017156,GO:0030054,GO:0030276,GO:0030672,GO:0046928,GO:0048792,GO:0060291,GO:0070382,GO:0071277	SNARE binding|phosphatidylserine binding|calcium ion binding|calcium-dependent phospholipid binding|plasma membrane|regulation of dopamine secretion|integral component of membrane|vesicle-mediated transport|calcium ion regulated exocytosis|cell junction|clathrin binding|synaptic vesicle membrane|regulation of neurotransmitter secretion|spontaneous exocytosis of neurotransmitter|long-term synaptic…
TCEA3	296.451	168.492	424.409	2.5186	1.33262	2.94492e-18	4.28847e-16	Up	8.51548	8.59944	8.71432	3.54949	2.81933	4.17595	GeneID:101121158	transcription elongation factor A3	GO:0003677,GO:0005634,GO:0006351,GO:0006355,GO:0008270	DNA binding|nucleus|transcription, DNA-templated|regulation of transcription, DNA-templated|zinc ion binding
TCF15	7.23737	11.4104	3.06429	0.267937	-1.90003	0.0240744	0.101988	Down	0.0524547	0.0872279	0.0174279	0.189828	0.210445	0.204794	GeneID:101107981	transcription factor 15	GO:0001756,GO:0003016,GO:0003677,GO:0007517,GO:0009952,GO:0010468,GO:0036342,GO:0042755,GO:0043583,GO:0043588,GO:0045198,GO:0045944,GO:0046983,GO:0048339,GO:0048644,GO:0048705,GO:0050884,GO:0060231,GO:0090575,GO:1903053	somitogenesis|respiratory system process|DNA binding|muscle organ development|anterior/posterior pattern specification|regulation of gene expression|post-anal tail morphogenesis|eating behavior|ear development|skin development|establishment of epithelial cell apical/basal polarity|positive regulation of transcription by RNA polymerase II|protein dimerization activity|paraxial mesoderm development…
TEX26	20.0929	13.0465	27.1392	2.08018	1.05671	0.0319635	0.124904	Up	0.669785	0.432416	0.471247	0.33053	0.296376	0.153822	GeneID:101111031	testis expressed 26	GO:0005737	cytoplasm
TFAP4	31.8569	43.0516	20.6622	0.480111	-1.05856	0.0113592	0.0591418	Down	0.166627	0.184725	0.212218	0.56646	0.417811	0.225884	GeneID:101122654	transcription factor AP-4	GO:0000981,GO:0001077,GO:0003677,GO:0003700,GO:0003705,GO:0005634,GO:0005739,GO:0006357,GO:0006978,GO:0008285,GO:0017053,GO:0042803,GO:0042826,GO:0043065,GO:0043392,GO:0043565,GO:0043922,GO:0043923,GO:0044212,GO:0045736,GO:0045892,GO:0045893,GO:0065003,GO:0070888,GO:0071157,GO:0071549,GO:1901990,GO:2001269	DNA-binding transcription factor activity, RNA polymerase II-specific|proximal promoter DNA-binding transcription activator activity, RNA polymerase II-specific|DNA binding|DNA-binding transcription factor activity|transcription factor activity, RNA polymerase II distal enhancer sequence-specific binding|nucleus|mitochondrion|regulation of transcription by RNA polymerase II|DNA damage response, s…	oas05205	Proteoglycans in cancer
TFCP2L1	3.20952	0.651251	5.76779	8.84754	3.14528	0.0296712	0.118284	Up	0.0260293	0.0129854	0.0162152	0.00321127	0	0.00317574	GeneID:101114420	transcription factor CP2 like 1	GO:0000122,GO:0000902,GO:0000977,GO:0000981,GO:0001650,GO:0002070,GO:0003700,GO:0003714,GO:0005634,GO:0005739,GO:0006357,GO:0006694,GO:0007028,GO:0007431,GO:0007565,GO:0008340,GO:0016020,GO:0043565,GO:0045927	negative regulation of transcription by RNA polymerase II|cell morphogenesis|RNA polymerase II regulatory region sequence-specific DNA binding|DNA-binding transcription factor activity, RNA polymerase II-specific|fibrillar center|epithelial cell maturation|DNA-binding transcription factor activity|transcription corepressor activity|nucleus|mitochondrion|regulation of transcription by RNA polymera…
TFPI2	14749.5	9494.98	20004	2.10681	1.07506	5.28113e-39	3.27682e-36	Up	289.812	287.809	308.782	151.809	158.664	123.094	GeneID:101113838	tissue factor pathway inhibitor 2	GO:0004867,GO:0005615,GO:0007596	serine-type endopeptidase inhibitor activity|extracellular space|blood coagulation
TG	205.985	294.328	117.642	0.399664	-1.32314	6.62486e-15	6.56551e-13	Down	0.352429	0.425313	0.384735	0.990509	0.885386	1.11714	GeneID:101122868	thyroglobulin	GO:0005179,GO:0005576,GO:0042393,GO:0042446	hormone activity|extracellular region|histone binding|hormone biosynthetic process	oas04918,oas05320	Thyroid hormone synthesis|Autoimmune thyroid disease
THEM5	9.72781	5.21055	14.2451	2.73226	1.45009	0.0432011	0.155022	Up	0.315414	0.445831	0.340584	0.12971	0.0527259	0.230895	GeneID:101119950	thioesterase superfamily member 5	GO:0005759,GO:0006631,GO:0006637,GO:0016290,GO:0035336,GO:0035965,GO:0047617,GO:0102991	mitochondrial matrix|fatty acid metabolic process|acyl-CoA metabolic process|palmitoyl-CoA hydrolase activity|long-chain fatty-acyl-CoA metabolic process|cardiolipin acyl-chain remodeling|acyl-CoA hydrolase activity|myristoyl-CoA hydrolase activity	oas00062	Fatty acid elongation
THSD4	53.5228	29.0274	78.0182	2.68784	1.42645	1.26901e-05	0.000229606	Up	0.281262	0.207422	0.213306	0.0633648	0.128786	0.0775835	GeneID:101115035	thrombospondin type 1 domain containing 4	GO:0001527,GO:0005201,GO:0008233,GO:0048251,GO:0062023,GO:0070062	microfibril|extracellular matrix structural constituent|peptidase activity|elastic fiber assembly|collagen-containing extracellular matrix|extracellular exosome	oas04350	TGF-beta signaling pathway
THSD7A	37.7283	22.1687	53.2879	2.40307	1.26488	0.000643839	0.00620826	Up	0.191281	0.115586	0.115469	0.0531801	0.0648515	0.06311	GeneID:101116649	thrombospondin type 1 domain containing 7A	GO:0001525,GO:0005576,GO:0005886,GO:0016021,GO:0030154,GO:0042995	angiogenesis|extracellular region|plasma membrane|integral component of membrane|cell differentiation|cell projection
TIE1	5.57464	9.44987	1.69942	0.179537	-2.47765	0.0159878	0.0755582	Down	0.00714847	0.0213972	0.00712515	0.0917195	0.0358491	0.07675	GeneID:443265	tyrosine kinase with immunoglobulin like and EGF like domains 1	GO:0001525,GO:0004714,GO:0004888,GO:0005524,GO:0005737,GO:0005887,GO:0009968,GO:0030154,GO:0043066,GO:0043235,GO:0070374	angiogenesis|transmembrane receptor protein tyrosine kinase activity|transmembrane signaling receptor activity|ATP binding|cytoplasm|integral component of plasma membrane|negative regulation of signal transduction|cell differentiation|negative regulation of apoptotic process|receptor complex|positive regulation of ERK1 and ERK2 cascade
TLL2	5.40173	1.63019	9.17327	5.62464	2.49176	0.0152037	0.0728339	Up	0.0732917	0.066479	0.0398469	0.0197282	0.00668278	0.00650332	GeneID:101107749	tolloid like 2	GO:0004222,GO:0004252,GO:0005509,GO:0005576,GO:0007275,GO:0008270,GO:0022617,GO:0030154,GO:0048632	metalloendopeptidase activity|serine-type endopeptidase activity|calcium ion binding|extracellular region|multicellular organism development|zinc ion binding|extracellular matrix disassembly|cell differentiation|negative regulation of skeletal muscle tissue growth
TLR2	88.2043	58.359	118.05	2.02252	1.01615	1.65672e-05	0.000287105	Up	1.38838	1.51662	1.25263	0.81509	0.672256	0.630838	GeneID:554262	toll like receptor 2	GO:0002755,GO:0005794,GO:0006954,GO:0016021,GO:0030670,GO:0034134,GO:0045087,GO:0045121,GO:0050707,GO:0050729,GO:0071726,GO:0071727	MyD88-dependent toll-like receptor signaling pathway|Golgi apparatus|inflammatory response|integral component of membrane|phagocytic vesicle membrane|toll-like receptor 2 signaling pathway|innate immune response|membrane raft|regulation of cytokine secretion|positive regulation of inflammatory response|cellular response to diacyl bacterial lipopeptide|cellular response to triacyl bacterial lipope…	oas04145,oas04151,oas04620,oas05134,oas05140,oas05142,oas05144,oas05145,oas05146,oas05152,oas05161,oas05162,oas05168,oas05169,oas05170,oas05205,oas05235,oas05321,oas05323	Phagosome|PI3K-Akt signaling pathway|Toll-like receptor signaling pathway|Legionellosis|Leishmaniasis|Chagas disease (American trypanosomiasis)|Malaria|Toxoplasmosis|Amoebiasis|Tuberculosis|Hepatitis B|Measles|Herpes simplex virus 1 infection|Epstein-Barr virus infection|Human immunodeficiency virus 1 infection|Proteoglycans in cancer|PD-L1 expression and PD-1 checkpoint pathway in cancer|Inflamm…
TM4SF18	12.0743	5.86826	18.2804	3.11617	1.63977	0.00859005	0.0478115	Up	0.355494	0.354695	0.48721	0.131574	0.133708	0.130118	GeneID:101121735	transmembrane 4 L six family member 18	GO:0016021	integral component of membrane
TMEM151A	165.381	102.929	227.832	2.21335	1.14623	0.0105162	0.0559571	Up	2.72787	2.29786	2.47382	1.03721	0.616724	1.82231	GeneID:101105200	transmembrane protein 151A	GO:0016021	integral component of membrane
TMEM155	45.8556	28.6882	63.0229	2.19703	1.13555	0.000501288	0.00509899	Up	0.68803	1.05163	0.97761	0.390102	0.44048	0.442939	GeneID:101114194	transmembrane protein 155	GO:0005576	extracellular region
TMEM229B	13.1019	6.51843	19.6853	3.01875	1.59395	0.0110413	0.0578663	Up	0.0880102	0.0439061	0.0501275	0.0124091	0.0220682	0.0276115	GeneID:101114112	transmembrane protein 229B	GO:0009617,GO:0016021	response to bacterium|integral component of membrane
TMEM255A	23.3006	14.0162	32.5851	2.32388	1.21654	0.00611352	0.0370958	Up	0.294992	0.294329	0.218422	0.11646	0.109896	0.131624	GeneID:101112455	transmembrane protein 255A	GO:0009617,GO:0016021	response to bacterium|integral component of membrane
TMEM273	97.8683	57.365	138.372	2.41173	1.27007	4.77365e-07	1.31166e-05	Up	2.64634	2.32142	2.26595	1.38482	0.694735	1.00545	GeneID:101116629	transmembrane protein 273	GO:0016021	integral component of membrane
TNFAIP8L3	111.955	53.4535	170.457	3.18876	1.67299	1.12972e-13	1.00764e-11	Up	2.85746	2.2401	2.78554	0.728302	0.803107	1.01141	GeneID:101107794	TNF alpha induced protein 8 like 3	GO:0005654,GO:0005737,GO:0005829,GO:0005886,GO:0006644,GO:0008526,GO:0015914,GO:0019216,GO:0035091,GO:0042981,GO:0043552,GO:0048017,GO:0051897,GO:0070374	nucleoplasm|cytoplasm|cytosol|plasma membrane|phospholipid metabolic process|phosphatidylinositol transporter activity|phospholipid transport|regulation of lipid metabolic process|phosphatidylinositol binding|regulation of apoptotic process|positive regulation of phosphatidylinositol 3-kinase activity|inositol lipid-mediated signaling|positive regulation of protein kinase B signaling|positive reg…
TNFRSF8	6.38899	2.60734	10.1706	3.90006	1.9635	0.0262316	0.108445	Up	0.141188	0.0758533	0.108252	0.0321573	0.0217861	0.0318015	GeneID:101111039	TNF receptor superfamily member 8			oas04060	Cytokine-cytokine receptor interaction
TNNI3	8.41588	1.62912	15.2026	9.33388	3.22248	0.000623011	0.00605653	Up	0.295631	0.426063	0.753038	0	0.065892	0.0961838	GeneID:101121961	troponin I3, cardiac type	GO:0000287,GO:0001570,GO:0001980,GO:0003009,GO:0005524,GO:0005861,GO:0006874,GO:0006936,GO:0010882,GO:0016887,GO:0019855,GO:0019901,GO:0019904,GO:0030172,GO:0031014,GO:0032780,GO:0048306,GO:0051015,GO:0055010,GO:0060048,GO:0097512,GO:1990584	magnesium ion binding|vasculogenesis|regulation of systemic arterial blood pressure by ischemic conditions|skeletal muscle contraction|ATP binding|troponin complex|cellular calcium ion homeostasis|muscle contraction|regulation of cardiac muscle contraction by calcium ion signaling|ATPase activity|calcium channel inhibitor activity|protein kinase binding|protein domain specific binding|troponin C …	oas04024,oas04260,oas04261,oas05410,oas05414	cAMP signaling pathway|Cardiac muscle contraction|Adrenergic signaling in cardiomyocytes|Hypertrophic cardiomyopathy (HCM)|Dilated cardiomyopathy (DCM)
TONSL	12.3342	19.2488	5.41964	0.281695	-1.82779	0.00765189	0.0437325	Down	0.0131147	0.0523408	0.0392157	0.142382	0.177577	0.0640031	GeneID:101116737	tonsoku like, DNA repair protein	GO:0000724,GO:0005662,GO:0005737,GO:0016604,GO:0031297,GO:0035101,GO:0042393,GO:0042555,GO:0043596	double-strand break repair via homologous recombination|DNA replication factor A complex|cytoplasm|nuclear body|replication fork processing|FACT complex|histone binding|MCM complex|nuclear replication fork
TSBP1	6.22879	2.60877	9.84881	3.77423	1.91618	0.0370206	0.138667	Up	0.0803977	0.171893	0.0801355	0.0113358	0.0460787	0.033631	GeneID:105603756	testis expressed basic protein 1	GO:0005634,GO:0016021	nucleus|integral component of membrane
TSPAN1	8.24439	2.60483	13.884	5.3274	2.41343	0.0041079	0.0269968	Up	0.187671	0.332887	0.332549	0.0411614	0.0209146	0.101765	GeneID:101101845	tetraspanin 1	GO:0005654,GO:0005765,GO:0005887,GO:0007166,GO:0008283,GO:0016477,GO:0030054,GO:0031982,GO:0045807,GO:0048471,GO:0050821	nucleoplasm|lysosomal membrane|integral component of plasma membrane|cell surface receptor signaling pathway|cell proliferation|cell migration|cell junction|vesicle|positive regulation of endocytosis|perinuclear region of cytoplasm|protein stabilization
TSPAN15	576.37	814.266	338.475	0.415649	-1.26656	3.13736e-20	5.39437e-18	Down	6.25953	5.52482	5.34781	15.8523	15.6093	11.0443	GeneID:101104803	tetraspanin 15	GO:0005887,GO:0007166,GO:0009986,GO:0019899,GO:0031902,GO:0051604,GO:0072659,GO:0097197	integral component of plasma membrane|cell surface receptor signaling pathway|cell surface|enzyme binding|late endosome membrane|protein maturation|protein localization to plasma membrane|tetraspanin-enriched microdomain
TTR	6.57896	10.1069	3.05107	0.301875	-1.72798	0.0460422	0.162399	Down	0.0885242	0.17665	0.132353	0.655282	0.355154	0.345616	GeneID:443389	transthyretin	GO:0005179,GO:0005576,GO:0042572,GO:0042802,GO:0070324,GO:0070327	hormone activity|extracellular region|retinol metabolic process|identical protein binding|thyroid hormone binding|thyroid hormone transport	oas04918	Thyroid hormone synthesis
TXNDC8	1.46581	2.93162	0	0.063802	-3.97025	0.045148	0.160037	Down	0	0	0	0.144708	0.147056	0.357767	GeneID:101113724	thioredoxin domain containing 8	GO:0005737,GO:0005794,GO:0006662,GO:0007275,GO:0007283,GO:0030154,GO:0045454,GO:0055114,GO:0070062	cytoplasm|Golgi apparatus|glycerol ether metabolic process|multicellular organism development|spermatogenesis|cell differentiation|cell redox homeostasis|oxidation-reduction process|extracellular exosome
UNC13C	11.4033	6.52076	16.2857	2.4971	1.32025	0.0476716	0.166256	Up	0.0480212	0.0684474	0.0478645	0.0406248	0.0137613	0.0133917	GeneID:101123470	unc-13 homolog C	GO:0005509,GO:0005516,GO:0005543,GO:0005886,GO:0007268,GO:0007528,GO:0016081,GO:0016082,GO:0016188,GO:0017075,GO:0019992,GO:0030054,GO:0030672,GO:0031594,GO:0031914,GO:0035249,GO:0035556,GO:0042734,GO:0043195,GO:0044305,GO:0048786,GO:0061789,GO:0098688,GO:0098831,GO:0099525	calcium ion binding|calmodulin binding|phospholipid binding|plasma membrane|chemical synaptic transmission|neuromuscular junction development|synaptic vesicle docking|synaptic vesicle priming|synaptic vesicle maturation|syntaxin-1 binding|diacylglycerol binding|cell junction|synaptic vesicle membrane|neuromuscular junction|negative regulation of synaptic plasticity|synaptic transmission, glutamat…	oas04721	Synaptic vesicle cycle
UPK1B	23.6853	10.4363	36.9344	3.53995	1.82373	0.000125993	0.0016511	Up	0.400779	0.719779	0.623175	0.142401	0.225106	0.140825	GeneID:101104704	uroplakin 1B	GO:0005783,GO:0005886,GO:0005887,GO:0007166,GO:0009617,GO:0016021,GO:0030855,GO:0034394,GO:0120001	endoplasmic reticulum|plasma membrane|integral component of plasma membrane|cell surface receptor signaling pathway|response to bacterium|integral component of membrane|epithelial cell differentiation|protein localization to cell surface|apical plasma membrane urothelial plaque
VANGL2	29.7064	40.4239	18.989	0.469682	-1.09025	0.00558374	0.034661	Down	0.11005	0.168363	0.131629	0.27516	0.309059	0.315081	GeneID:101102530	VANGL planar cell polarity protein 2	GO:0001725,GO:0001736,GO:0001843,GO:0001942,GO:0001947,GO:0003149,GO:0003150,GO:0003402,GO:0005886,GO:0005911,GO:0007266,GO:0009952,GO:0015012,GO:0016021,GO:0016323,GO:0016324,GO:0016328,GO:0022007,GO:0030111,GO:0030134,GO:0032835,GO:0032956,GO:0035019,GO:0035787,GO:0036342,GO:0036514,GO:0036515,GO:0042060,GO:0043507,GO:0045176,GO:0045197,GO:0048103,GO:0048105,GO:0048546,GO:0060028,GO:0060122,GO:…	stress fiber|establishment of planar polarity|neural tube closure|hair follicle development|heart looping|membranous septum morphogenesis|muscular septum morphogenesis|planar cell polarity pathway involved in axis elongation|plasma membrane|cell-cell junction|Rho protein signal transduction|anterior/posterior pattern specification|heparan sulfate proteoglycan biosynthetic process|integral compone…	oas04310	Wnt signaling pathway
VSNL1	2.87237	0.652865	5.09187	7.80365	2.96415	0.0449707	0.159845	Up	0.0932142	0.0775038	0.0619401	0.0153333	0.0155821	0	GeneID:101122768	visinin like 1	GO:0005509,GO:0005829,GO:0016020,GO:0035774,GO:0045921,GO:0046676	calcium ion binding|cytosol|membrane|positive regulation of insulin secretion involved in cellular response to glucose stimulus|positive regulation of exocytosis|negative regulation of insulin secretion
VSTM2L	9.76457	4.24058	15.2886	3.60452	1.84981	0.0105625	0.0561197	Up	0.231122	0.30747	0.153579	0.0608297	0.0927249	0.0451174	GeneID:101122879	V-set and transmembrane domain containing 2 like	GO:0005576,GO:0005737,GO:0005886,GO:0007156,GO:0007411,GO:0030424,GO:0043524,GO:0070593,GO:0098632	extracellular region|cytoplasm|plasma membrane|homophilic cell adhesion via plasma membrane adhesion molecules|axon guidance|axon|negative regulation of neuron apoptotic process|dendrite self-avoidance|cell-cell adhesion mediator activity
WDFY4	15.1692	21.5394	8.79899	0.408807	-1.29051	0.0480797	0.167261	Down	0.0222799	0.0194511	0.030535	0.0797126	0.0893858	0.0135915	GeneID:101117047	WDFY family member 4	GO:0016021	integral component of membrane
WDR87	41.2999	22.5011	60.0988	2.67031	1.41701	8.3629e-05	0.00117007	Up	0.222009	0.168347	0.132771	0.0555095	0.0860996	0.0606737	GeneID:101109732	WD repeat domain 87
WNT10B	103.7	50.5388	156.862	3.1043	1.63427	5.11679e-12	3.66943e-10	Up	2.25309	1.53744	2.19412	0.677346	0.71431	0.594018	GeneID:101102299	Wnt family member 10B	GO:0000086,GO:0000122,GO:0002062,GO:0005102,GO:0005109,GO:0005615,GO:0006357,GO:0006629,GO:0007050,GO:0007165,GO:0007224,GO:0007267,GO:0008284,GO:0009887,GO:0010971,GO:0014835,GO:0016055,GO:0030182,GO:0030501,GO:0030858,GO:0032434,GO:0043065,GO:0043403,GO:0045165,GO:0045598,GO:0045599,GO:0045669,GO:0045778,GO:0045899,GO:0045944,GO:0048641,GO:0048741,GO:0050680,GO:0050821,GO:0050909,GO:0051091,GO:…	G2/M transition of mitotic cell cycle|negative regulation of transcription by RNA polymerase II|chondrocyte differentiation|signaling receptor binding|frizzled binding|extracellular space|regulation of transcription by RNA polymerase II|lipid metabolic process|cell cycle arrest|signal transduction|smoothened signaling pathway|cell-cell signaling|positive regulation of cell proliferation|animal or…	oas04150,oas04310,oas04390,oas04550,oas04916,oas04934,oas05165,oas05200,oas05205,oas05217,oas05224,oas05225,oas05226	mTOR signaling pathway|Wnt signaling pathway|Hippo signaling pathway|Signaling pathways regulating pluripotency of stem cells|Melanogenesis|Cushing syndrome|Human papillomavirus infection|Pathways in cancer|Proteoglycans in cancer|Basal cell carcinoma|Breast cancer|Hepatocellular carcinoma|Gastric cancer
WNT2B	20.2725	12.7239	27.8211	2.18671	1.12876	0.0242252	0.102435	Up	0.32999	0.405228	0.303613	0.112739	0.267326	0.111492	GeneID:101116782	Wnt family member 2B	GO:0002062,GO:0005102,GO:0005109,GO:0005615,GO:0007165,GO:0007267,GO:0008584,GO:0009267,GO:0009887,GO:0016055,GO:0021871,GO:0030182,GO:0043231,GO:0045165,GO:0060070,GO:0060492,GO:0060638,GO:0071425,GO:0090190	chondrocyte differentiation|signaling receptor binding|frizzled binding|extracellular space|signal transduction|cell-cell signaling|male gonad development|cellular response to starvation|animal organ morphogenesis|Wnt signaling pathway|forebrain regionalization|neuron differentiation|intracellular membrane-bounded organelle|cell fate commitment|canonical Wnt signaling pathway|lung induction|mesen…	oas04150,oas04310,oas04390,oas04550,oas04916,oas04934,oas05165,oas05200,oas05205,oas05217,oas05224,oas05225,oas05226	mTOR signaling pathway|Wnt signaling pathway|Hippo signaling pathway|Signaling pathways regulating pluripotency of stem cells|Melanogenesis|Cushing syndrome|Human papillomavirus infection|Pathways in cancer|Proteoglycans in cancer|Basal cell carcinoma|Breast cancer|Hepatocellular carcinoma|Gastric cancer
XPNPEP2	2214.24	3279.36	1149.11	0.350395	-1.51295	4.57932e-10	2.30924e-08	Down	9.35662	7.73596	5.66683	24.8121	23.8837	18.344	GeneID:101120054	X-prolyl aminopeptidase 2	GO:0005886,GO:0031225,GO:0046872,GO:0070006	plasma membrane|anchored component of membrane|metal ion binding|metalloaminopeptidase activity	oas04974	Protein digestion and absorption
ZBTB3	25.7149	36.2005	15.2292	0.421024	-1.24803	0.00400049	0.0264923	Down	0.182341	0.181931	0.265629	0.51221	0.633066	0.39702	GeneID:101112272	zinc finger and BTB domain containing 3	GO:0003677,GO:0005634,GO:0006974,GO:0046872	DNA binding|nucleus|cellular response to DNA damage stimulus|metal ion binding
ZNF521	5.7255	10.4274	1.02363	0.0977037	-3.35544	0.00344566	0.0235861	Down	0.00573918	0.0114525	0	0.0453153	0.0518069	0.084026	GeneID:101120210	zinc finger protein 521	GO:0000981,GO:0003677,GO:0005634,GO:0019904,GO:0046872,GO:0048663	DNA-binding transcription factor activity, RNA polymerase II-specific|DNA binding|nucleus|protein domain specific binding|metal ion binding|neuron fate commitment

## Sheet: FTO_OE-vs-NC
gene_id	BaseMean_DESeq2	BaseMean_control_NC	BaseMean_case_FTO_OE	FoldChange	log2FoldChange	p-value	q-value	Regulation	Expression_FTO_OE1	Expression_FTO_OE2	Expression_FTO_OE3	Expression_NC1	Expression_NC2	Expression_NC3	gene_Dbxref	description	GO_id	GO_term	pathway	pathway_description
ABCA10	62.1398	39.7235	84.5561	2.12946	1.09049	0.000325175	0.00265045	Up	0.400765	0.359479	0.392242	0.204326	0.1941	0.105425	GeneID:101108240	ATP binding cassette subfamily A member 10			oas02010	ABC transporters
ABCA12	69.4789	36.8796	102.078	2.76716	1.4684	5.7133e-06	8.3413e-05	Up	0.194824	0.311795	0.439108	0.114635	0.0919698	0.110383	GeneID:101104887	ATP binding cassette subfamily A member 12			oas02010	ABC transporters
ABCA7	237.523	322.971	152.075	0.470787	-1.08685	5.07378e-09	1.68308e-07	Down	0.599786	0.588259	0.455345	1.1925	1.22261	0.837379	GeneID:101116568	ATP binding cassette subfamily A member 7			oas02010	ABC transporters
ABCB9	76.0805	40.4072	111.754	2.76557	1.46758	4.23854e-08	1.13431e-06	Up	0.881347	0.936051	0.923808	0.375999	0.284542	0.261078	GeneID:101119252	ATP binding cassette subfamily B member 9			oas02010,oas04142	ABC transporters|Lysosome
ABI3BP	5841.23	3557.78	8124.69	2.28361	1.19131	1.09683e-27	5.3949e-25	Up	31.2785	38.9723	38.169	16.0992	15.6835	12.4079	GeneID:101108803	ABI family member 3 binding protein	GO:0005201,GO:0005518,GO:0005576,GO:0005614,GO:0005615,GO:0008201,GO:0010811,GO:0030198,GO:0062023	extracellular matrix structural constituent|collagen binding|extracellular region|interstitial matrix|extracellular space|heparin binding|positive regulation of cell-substrate adhesion|extracellular matrix organization|collagen-containing extracellular matrix
ACOD1	23.715	3.86687	43.5631	11.2661	3.49391	8.11591e-08	2.00981e-06	Up	0.247556	0.577631	0.758824	0.0829372	0.0240808	0.0234341	GeneID:101102743	aconitate decarboxylase 1	GO:0002760,GO:0005739,GO:0006952,GO:0006954,GO:0007566,GO:0019679,GO:0032088,GO:0032480,GO:0034136,GO:0034144,GO:0035458,GO:0045824,GO:0047547,GO:0047613,GO:0050728,GO:0071219,GO:0071222,GO:0071346,GO:0071347,GO:0071356,GO:0071393,GO:0072573,GO:2000379	positive regulation of antimicrobial humoral response|mitochondrion|defense response|inflammatory response|embryo implantation|propionate metabolic process, methylcitrate cycle|negative regulation of NF-kappaB transcription factor activity|negative regulation of type I interferon production|negative regulation of toll-like receptor 2 signaling pathway|negative regulation of toll-like receptor 4 s…
ADAMTS17	502.262	691.721	312.803	0.452147	-1.14514	0.027246	0.094618	Down	1.14782	2.21336	0.891495	2.1362	2.33854	4.30451	GeneID:101110624	ADAM metallopeptidase with thrombospondin type 1 motif 17	GO:0003676,GO:0004222,GO:0005576,GO:0046872	nucleic acid binding|metalloendopeptidase activity|extracellular region|metal ion binding
ADAP2	23.6831	9.83296	37.5333	3.81463	1.93154	9.25465e-05	0.000923135	Up	0.188576	0.297322	0.330306	0.0496395	0.0720642	0.0771418	GeneID:101121946	ArfGAP with dual PH domains 2	GO:0005096,GO:0005546,GO:0005547,GO:0005737,GO:0005740,GO:0005886,GO:0007507,GO:0030674,GO:0043325,GO:0043533,GO:0046872	GTPase activator activity|phosphatidylinositol-4,5-bisphosphate binding|phosphatidylinositol-3,4,5-trisphosphate binding|cytoplasm|mitochondrial envelope|plasma membrane|heart development|protein binding, bridging|phosphatidylinositol-3,4-bisphosphate binding|inositol 1,3,4,5 tetrakisphosphate binding|metal ion binding
ADIPOQ	50.8121	25.5912	76.033	2.96854	1.56976	0.000341073	0.00276267	Up	0.919021	1.20203	0.964739	0.198836	0.121237	0.642342	GeneID:101111848	adiponectin, C1Q and collagen domain containing	GO:0001934,GO:0005102,GO:0005179,GO:0005581,GO:0005615,GO:0005623,GO:0005783,GO:0006006,GO:0006635,GO:0009617,GO:0009749,GO:0009967,GO:0009986,GO:0010642,GO:0010739,GO:0010745,GO:0010804,GO:0010875,GO:0010906,GO:0019395,GO:0030336,GO:0030853,GO:0031953,GO:0032270,GO:0032720,GO:0032757,GO:0032869,GO:0033034,GO:0033691,GO:0034115,GO:0034383,GO:0034612,GO:0035690,GO:0042593,GO:0042802,GO:0042803,GO:…	positive regulation of protein phosphorylation|signaling receptor binding|hormone activity|collagen trimer|extracellular space|cell|endoplasmic reticulum|glucose metabolic process|fatty acid beta-oxidation|response to bacterium|response to glucose|positive regulation of signal transduction|cell surface|negative regulation of platelet-derived growth factor receptor signaling pathway|positive regul…	oas03320,oas04152,oas04211,oas04920,oas04930,oas04932	PPAR signaling pathway|AMPK signaling pathway|Longevity regulating pathway|Adipocytokine signaling pathway|Type II diabetes mellitus|Non-alcoholic fatty liver disease (NAFLD)
ADM	3150.55	4471.76	1829.34	0.409074	-1.28957	0.000156161	0.00145018	Down	24.5954	36.5188	21.2829	72.4741	72.7662	42.9566	GeneID:101103753	adrenomedullin	GO:0001570,GO:0001843,GO:0002031,GO:0003073,GO:0005179,GO:0005615,GO:0005737,GO:0007189,GO:0007507,GO:0008284,GO:0010460,GO:0031700,GO:0035809,GO:0043116,GO:0045766,GO:0045906,GO:0048589,GO:0060670,GO:0060712,GO:0097084,GO:0097647,GO:1990410,GO:2001214	vasculogenesis|neural tube closure|G protein-coupled receptor internalization|regulation of systemic arterial blood pressure|hormone activity|extracellular space|cytoplasm|adenylate cyclase-activating G protein-coupled receptor signaling pathway|heart development|positive regulation of cell proliferation|positive regulation of heart rate|adrenomedullin receptor binding|regulation of urine volume|…	oas04080,oas04270	Neuroactive ligand-receptor interaction|Vascular smooth muscle contraction
ADORA2A	15.4305	22.1359	8.72501	0.395597	-1.3379	0.0246153	0.0872764	Down	0.140607	0.038495	0.0861993	0.266489	0.180542	0.175693	GeneID:101112926	adenosine A2a receptor	GO:0001609,GO:0001963,GO:0001975,GO:0005622,GO:0005887,GO:0007189,GO:0007626,GO:0019899,GO:0032230,GO:0042755,GO:0042802,GO:0046636,GO:0050728,GO:0060080,GO:0098794,GO:2001235	G protein-coupled adenosine receptor activity|synaptic transmission, dopaminergic|response to amphetamine|intracellular|integral component of plasma membrane|adenylate cyclase-activating G protein-coupled receptor signaling pathway|locomotory behavior|enzyme binding|positive regulation of synaptic transmission, GABAergic|eating behavior|identical protein binding|negative regulation of alpha-beta …	oas04015,oas04020,oas04024,oas04080,oas04270,oas05012,oas05034	Rap1 signaling pathway|Calcium signaling pathway|cAMP signaling pathway|Neuroactive ligand-receptor interaction|Vascular smooth muscle contraction|Parkinson disease|Alcoholism
ADRB1	79.1245	111.74	46.5088	0.416408	-1.26393	1.37627e-06	2.41464e-05	Down	0.437095	0.419484	0.572817	1.14057	1.14891	0.900383	GeneID:443528	adrenoceptor beta 1	GO:0001996,GO:0002025,GO:0004935,GO:0004940,GO:0005088,GO:0005769,GO:0005886,GO:0005887,GO:0007188,GO:0043547,GO:0043950,GO:0051379,GO:0051380,GO:0071880	positive regulation of heart rate by epinephrine-norepinephrine|norepinephrine-epinephrine-mediated vasodilation involved in regulation of systemic arterial blood pressure|adrenergic receptor activity|beta1-adrenergic receptor activity|Ras guanyl-nucleotide exchange factor activity|early endosome|plasma membrane|integral component of plasma membrane|adenylate cyclase-modulating G protein-coupled …	oas04020,oas04022,oas04024,oas04080,oas04261,oas04540,oas04923,oas04924,oas04970,oas05414	Calcium signaling pathway|cGMP-PKG signaling pathway|cAMP signaling pathway|Neuroactive ligand-receptor interaction|Adrenergic signaling in cardiomyocytes|Gap junction|Regulation of lipolysis in adipocytes|Renin secretion|Salivary secretion|Dilated cardiomyopathy (DCM)
AFF2	23.5786	32.3174	14.8398	0.458504	-1.12499	0.0121677	0.050745	Down	0.0499353	0.0695765	0.0510215	0.116424	0.114496	0.115135	GeneID:101116804	AF4/FMR2 family member 2	GO:0002151,GO:0005634,GO:0006355,GO:0006397,GO:0007420,GO:0007611,GO:0008380,GO:0010468,GO:0010629,GO:0016607,GO:0035063,GO:0043484	G-quadruplex RNA binding|nucleus|regulation of transcription, DNA-templated|mRNA processing|brain development|learning or memory|RNA splicing|regulation of gene expression|negative regulation of gene expression|nuclear speck|nuclear speck organization|regulation of RNA splicing
AGER	48.1756	66.0806	30.2706	0.457762	-1.12733	0.000861825	0.00587904	Down	0.40784	0.502458	0.416711	1.04494	1.0328	0.622858	GeneID:101111586	advanced glycosylation end-product specific receptor	GO:0006954,GO:0016021	inflammatory response|integral component of membrane	oas04933	AGE-RAGE signaling pathway in diabetic complications
AJM1	13.8599	20.7388	6.98097	0.335517	-1.57554	0.0163544	0.0637199	Down	0.03584	0.0551936	0.00915492	0.0896256	0.124636	0.0653092	GeneID:106990977	apical junction component 1 homolog	GO:0005912,GO:0005929,GO:0016324,GO:0045216	adherens junction|cilium|apical plasma membrane|cell-cell junction organization
AKAP12	639.346	322.336	956.355	2.96689	1.56895	4.90621e-25	1.74955e-22	Up	2.78709	2.73499	3.76831	0.82536	0.903023	1.17587	GeneID:101105509	A-kinase anchoring protein 12
AKAP4	42.5425	25.301	59.7841	2.36309	1.24067	0.000529626	0.00393468	Up	0.37907	0.333582	0.236414	0.134773	0.13696	0.102524	GeneID:101102535	A-kinase anchoring protein 4	GO:0005737,GO:0005929,GO:0007178,GO:0008104,GO:0010738,GO:0030018,GO:0030317,GO:0031514,GO:0035686,GO:0044458,GO:0045184,GO:0048471,GO:0051018,GO:0097228	cytoplasm|cilium|transmembrane receptor protein serine/threonine kinase signaling pathway|protein localization|regulation of protein kinase A signaling|Z disc|flagellated sperm motility|motile cilium|sperm fibrous sheath|motile cilium assembly|establishment of protein localization|perinuclear region of cytoplasm|protein kinase A binding|sperm principal piece
AKNA	310.087	451.176	168.999	0.374539	-1.41681	1.56079e-20	3.47862e-18	Down	0.887777	0.891636	0.85286	2.4182	2.28191	1.8388	GeneID:101118854	AT-hook transcription factor	GO:0000978,GO:0000981,GO:0001077,GO:0001650,GO:0005654,GO:0005813,GO:0005829,GO:0016020,GO:0043231,GO:0045944	RNA polymerase II proximal promoter sequence-specific DNA binding|DNA-binding transcription factor activity, RNA polymerase II-specific|proximal promoter DNA-binding transcription activator activity, RNA polymerase II-specific|fibrillar center|nucleoplasm|centrosome|cytosol|membrane|intracellular membrane-bounded organelle|positive regulation of transcription by RNA polymerase II
ALDH1A3	211.482	88.3771	334.587	3.78573	1.92057	0.000744383	0.00521251	Up	2.99872	2.12896	3.22149	0.397725	0.404178	1.23616	GeneID:101109831	aldehyde dehydrogenase 1 family member A3	GO:0001758,GO:0002072,GO:0002138,GO:0004029,GO:0004030,GO:0005634,GO:0005737,GO:0005829,GO:0005886,GO:0007626,GO:0021768,GO:0031076,GO:0042472,GO:0042572,GO:0042573,GO:0042574,GO:0042803,GO:0043065,GO:0048048,GO:0050885,GO:0051289,GO:0060013,GO:0060166,GO:0060324,GO:0070062,GO:0070324,GO:0070384,GO:0070403	retinal dehydrogenase activity|optic cup morphogenesis involved in camera-type eye development|retinoic acid biosynthetic process|aldehyde dehydrogenase (NAD) activity|aldehyde dehydrogenase [NAD(P)+] activity|nucleus|cytoplasm|cytosol|plasma membrane|locomotory behavior|nucleus accumbens development|embryonic camera-type eye development|inner ear morphogenesis|retinol metabolic process|retinoic …	oas00010,oas00340,oas00350,oas00360,oas00410,oas00980,oas00982,oas05204	Glycolysis / Gluconeogenesis|Histidine metabolism|Tyrosine metabolism|Phenylalanine metabolism|beta-Alanine metabolism|Metabolism of xenobiotics by cytochrome P450|Drug metabolism - cytochrome P450|Chemical carcinogenesis
AMDHD1	27.4659	37.9591	16.9727	0.447329	-1.16059	0.00678382	0.03182	Down	0.228986	0.221263	0.289018	0.510578	0.648577	0.378696	GeneID:101121504	amidohydrolase domain containing 1	GO:0005737,GO:0019556,GO:0019557,GO:0046872,GO:0050480	cytoplasm|histidine catabolic process to glutamate and formamide|histidine catabolic process to glutamate and formate|metal ion binding|imidazolonepropionase activity	oas00340	Histidine metabolism
AMH	11.5045	18.6321	4.37693	0.23567	-2.08516	0.00295089	0.0161168	Down	0.102788	0.0452268	0.0600139	0.324687	0.329955	0.168192	GeneID:101121773	anti-Mullerian hormone	GO:0001655,GO:0001880,GO:0005615,GO:0007506,GO:0008083,GO:0030154	urogenital system development|Mullerian duct regression|extracellular space|gonadal mesoderm development|growth factor activity|cell differentiation	oas04024,oas04060,oas04350,oas04390	cAMP signaling pathway|Cytokine-cytokine receptor interaction|TGF-beta signaling pathway|Hippo signaling pathway
AMHR2	47.6241	64.6482	30.6001	0.472879	-1.08046	0.00137218	0.00865668	Down	0.506365	0.56319	0.316176	1.03671	0.887979	0.805548	GeneID:101109693	anti-Mullerian hormone receptor type 2	GO:0004675,GO:0005524,GO:0016021,GO:0046872	transmembrane receptor protein serine/threonine kinase activity|ATP binding|integral component of membrane|metal ion binding	oas04060,oas04350	Cytokine-cytokine receptor interaction|TGF-beta signaling pathway
AMPD3	998.767	1393.71	603.821	0.433244	-1.20675	0.000829278	0.00570063	Down	3.61348	3.9089	3.93222	10.2264	9.90196	4.50294	GeneID:101103503	adenosine monophosphate deaminase 3	GO:0003876,GO:0005576,GO:0005829,GO:0006196,GO:0032264,GO:0034101,GO:0034774,GO:0043101,GO:0043312,GO:0046031,GO:0046034,GO:0046039,GO:0046872,GO:0097009,GO:1904813	AMP deaminase activity|extracellular region|cytosol|AMP catabolic process|IMP salvage|erythrocyte homeostasis|secretory granule lumen|purine-containing compound salvage|neutrophil degranulation|ADP metabolic process|ATP metabolic process|GTP metabolic process|metal ion binding|energy homeostasis|ficolin-1-rich granule lumen	oas00230	Purine metabolism
ANGPT2	30.9501	16.5308	45.3695	2.74508	1.45685	0.0015748	0.0096532	Up	0.46719	0.488872	0.358014	0.12298	0.259563	0.0654871	GeneID:497273	angiopoietin 2	GO:0001525,GO:0004540,GO:0005615,GO:0010812,GO:0016525,GO:0030154,GO:0030971,GO:0043537,GO:0046872,GO:0048014,GO:0050928	angiogenesis|ribonuclease activity|extracellular space|negative regulation of cell-substrate adhesion|negative regulation of angiogenesis|cell differentiation|receptor tyrosine kinase binding|negative regulation of blood vessel endothelial cell migration|metal ion binding|Tie signaling pathway|negative regulation of positive chemotaxis	oas04010,oas04014,oas04015,oas04066,oas04151,oas05167	MAPK signaling pathway|Ras signaling pathway|Rap1 signaling pathway|HIF-1 signaling pathway|PI3K-Akt signaling pathway|Kaposi sarcoma-associated herpesvirus infection
ANGPTL4	737.83	1012.37	463.295	0.457658	-1.12766	2.73911e-17	3.79425e-15	Down	8.54303	8.75185	10.3915	21.8261	18.9946	15.4038	GeneID:101104317	angiopoietin like 4	GO:0001525,GO:0004857,GO:0005615,GO:0030154,GO:0042802,GO:0051005,GO:0070328,GO:2000352	angiogenesis|enzyme inhibitor activity|extracellular space|cell differentiation|identical protein binding|negative regulation of lipoprotein lipase activity|triglyceride homeostasis|negative regulation of endothelial cell apoptotic process	oas03320,oas04979	PPAR signaling pathway|Cholesterol metabolism
ANKRD1	6742.01	9745.39	3738.62	0.383628	-1.38222	6.08876e-09	1.98288e-07	Down	71.9003	64.3038	46.9532	129.131	136.671	178.32	GeneID:100820746	ankyrin repeat domain 1	GO:0001650,GO:0002039,GO:0003677,GO:0003713,GO:0003714,GO:0003779,GO:0005634,GO:0005667,GO:0005737,GO:0005829,GO:0006357,GO:0031432,GO:0031674,GO:0035690,GO:0035914,GO:0035994,GO:0042826,GO:0043065,GO:0043517,GO:0045445,GO:0048471,GO:0050714,GO:0055008,GO:0061629,GO:0070412,GO:0071222,GO:0071260,GO:0071347,GO:0071356,GO:0071560,GO:2000279	fibrillar center|p53 binding|DNA binding|transcription coactivator activity|transcription corepressor activity|actin binding|nucleus|transcription factor complex|cytoplasm|cytosol|regulation of transcription by RNA polymerase II|titin binding|I band|cellular response to drug|skeletal muscle cell differentiation|response to muscle stretch|histone deacetylase binding|positive regulation of apoptoti…
ANKRD2	17.8768	27.7828	7.97088	0.285573	-1.80807	0.0046817	0.0234233	Down	0.0596996	0.306458	0.142329	0.775269	0.660088	0.227935	GeneID:101109057	ankyrin repeat domain 2	GO:0000122,GO:0000791,GO:0001817,GO:0003682,GO:0005634,GO:0005737,GO:0005829,GO:0006357,GO:0006936,GO:0007517,GO:0008307,GO:0010832,GO:0016605,GO:0031432,GO:0031674,GO:0035914,GO:0043231,GO:0043422,GO:0043619,GO:0045445,GO:0045662,GO:0061629,GO:1902253,GO:2000291	negative regulation of transcription by RNA polymerase II|euchromatin|regulation of cytokine production|chromatin binding|nucleus|cytoplasm|cytosol|regulation of transcription by RNA polymerase II|muscle contraction|muscle organ development|structural constituent of muscle|negative regulation of myotube differentiation|PML body|titin binding|I band|skeletal muscle cell differentiation|intracellul…
ANKRD22	393.615	586.963	200.268	0.341247	-1.55111	4.67072e-18	7.24481e-16	Down	2.45434	2.45583	3.15693	8.77595	7.99851	5.20212	GeneID:101120533	ankyrin repeat domain 22
ANKRD37	87.0847	127.927	46.242	0.360763	-1.47088	6.8706e-07	1.30844e-05	Down	0.689717	1.53043	1.09118	2.83462	3.52339	2.2009	GeneID:101112948	ankyrin repeat domain 37	GO:0005634,GO:0005739,GO:0005829	nucleus|mitochondrion|cytosol
ANXA9	14.0684	6.3167	21.8202	3.45809	1.78997	0.00758472	0.0347538	Up	0.555671	0.160907	0.291158	0.0750107	0.0609822	0.133525	GeneID:101109752	annexin A9	GO:0001786,GO:0005509,GO:0005544,GO:0015464	phosphatidylserine binding|calcium ion binding|calcium-dependent phospholipid binding|acetylcholine receptor activity
AOC2	319.425	481.485	157.365	0.326805	-1.6135	1.52931e-21	3.96621e-19	Down	1.26233	1.3038	1.29756	4.13957	4.10095	2.76349	GeneID:101106783	amine oxidase copper containing 2			oas00260,oas00350,oas00360,oas00410	Glycine, serine and threonine metabolism|Tyrosine metabolism|Phenylalanine metabolism|beta-Alanine metabolism
AP5Z1	67.399	91.3914	43.4066	0.474998	-1.07401	0.00256265	0.0144424	Down	0.465369	0.393958	0.283627	1.20351	0.576576	0.459075	GeneID:114108638	adaptor related protein complex 5 subunit zeta 1	GO:0000724,GO:0005634,GO:0005654,GO:0005737,GO:0015031,GO:0016197,GO:0016607,GO:0030119,GO:0044599	double-strand break repair via homologous recombination|nucleus|nucleoplasm|cytoplasm|protein transport|endosomal transport|nuclear speck|AP-type membrane coat adaptor complex|AP-5 adaptor complex
AQP11	8.35606	12.6434	4.06871	0.322543	-1.63244	0.0343072	0.112678	Down	0.0828051	0.0425066	0.0564042	0.203439	0.132904	0.186817	GeneID:101111499	aquaporin 11	GO:0005783,GO:0005829,GO:0005886,GO:0009986,GO:0015250,GO:0016021,GO:0030425,GO:0048388,GO:0051260,GO:0072014	endoplasmic reticulum|cytosol|plasma membrane|cell surface|water channel activity|integral component of membrane|dendrite|endosomal lumen acidification|protein homooligomerization|proximal tubule development
AQP3	2.46308	4.92615	0	0.0352549	-4.82603	0.00715379	0.0331627	Down	0	0	0	0.0764135	0.124245	0.0151136	GeneID:443047	aquaporin 3 (Gill blood group)	GO:0002684,GO:0005634,GO:0005737,GO:0005911,GO:0015254,GO:0015840,GO:0016021,GO:0016323,GO:0032526,GO:0042476,GO:0070295,GO:0071456,GO:0090650	positive regulation of immune system process|nucleus|cytoplasm|cell-cell junction|glycerol channel activity|urea transport|integral component of membrane|basolateral plasma membrane|response to retinoic acid|odontogenesis|renal water absorption|cellular response to hypoxia|cellular response to oxygen-glucose deprivation	oas04962	Vasopressin-regulated water reabsorption
ARC	80.8091	111.767	49.8509	0.445701	-1.16585	0.000141168	0.00132562	Down	1.37364	1.47851	0.701762	2.98602	2.67886	1.7764	GeneID:101120169	activity regulated cytoskeleton associated protein	GO:0001669,GO:0003729,GO:0005737,GO:0005886,GO:0005938,GO:0006897,GO:0007010,GO:0007492,GO:0007612,GO:0007616,GO:0009952,GO:0015629,GO:0016477,GO:0022604,GO:0030054,GO:0031901,GO:0043025,GO:0043197,GO:0045121,GO:0048168,GO:0051028,GO:0051260,GO:0060291,GO:0060997,GO:0061001,GO:0098839,GO:0098845,GO:0098978,GO:0099149,GO:0110077,GO:1900271,GO:1900452,GO:1903561,GO:2000969	acrosomal vesicle|mRNA binding|cytoplasm|plasma membrane|cell cortex|endocytosis|cytoskeleton organization|endoderm development|learning|long-term memory|anterior/posterior pattern specification|actin cytoskeleton|cell migration|regulation of cell morphogenesis|cell junction|early endosome membrane|neuronal cell body|dendritic spine|membrane raft|regulation of neuronal synaptic plasticity|mRNA tr…	oas05031	Amphetamine addiction
ARG2	117.095	60.463	173.727	2.8717	1.52191	4.42484e-07	8.91467e-06	Up	2.41055	5.06301	2.80141	1.35626	1.27982	0.708948	GeneID:780468	arginase 2	GO:0000050,GO:0002250,GO:0004053,GO:0005737,GO:0005739,GO:0019547,GO:0030145,GO:0045087	urea cycle|adaptive immune response|arginase activity|cytoplasm|mitochondrion|arginine catabolic process to ornithine|manganese ion binding|innate immune response	oas00220,oas00330,oas05146	Arginine biosynthesis|Arginine and proline metabolism|Amoebiasis
ARHGAP20	15.6237	22.098	9.14942	0.413493	-1.27406	0.0377932	0.121432	Down	0.028874	0.0407605	0.0368776	0.0418032	0.0579293	0.139055	GeneID:101106623	Rho GTPase activating protein 20
ARHGAP4	6.72156	11.2526	2.19055	0.195234	-2.35672	0.0150469	0.0598019	Down	0.00742884	0.00762694	0.0379522	0.117331	0.0953876	0.0386775	GeneID:101107503	Rho GTPase activating protein 4	GO:0005070,GO:0005096,GO:0005737,GO:0005794,GO:0005829,GO:0005874,GO:0007010,GO:0007266,GO:0010764,GO:0030336,GO:0030426,GO:0030517,GO:0042802,GO:0048365,GO:0051056	SH3/SH2 adaptor activity|GTPase activator activity|cytoplasm|Golgi apparatus|cytosol|microtubule|cytoskeleton organization|Rho protein signal transduction|negative regulation of fibroblast migration|negative regulation of cell migration|growth cone|negative regulation of axon extension|identical protein binding|Rac GTPase binding|regulation of small GTPase mediated signal transduction
ARHGAP45	220.008	311.518	128.499	0.412595	-1.2772	6.08054e-07	1.17524e-05	Down	0.810768	0.617115	0.50466	1.78587	1.7949	0.786014	GeneID:101112901	Rho GTPase activating protein 45	GO:0005096,GO:0005576,GO:0005829,GO:0016020,GO:0032587,GO:0034774,GO:0035556,GO:0035578,GO:0043312,GO:0046872,GO:0051056	GTPase activator activity|extracellular region|cytosol|membrane|ruffle membrane|secretory granule lumen|intracellular signal transduction|azurophil granule lumen|neutrophil degranulation|metal ion binding|regulation of small GTPase mediated signal transduction
ARHGDIB	53.9343	31.9855	75.883	2.37437	1.24755	0.00013403	0.00126927	Up	1.58573	1.11583	1.67484	0.581568	0.724456	0.408159	GeneID:101106069	Rho GDP dissociation inhibitor beta	GO:0003924,GO:0005094,GO:0005096,GO:0005829,GO:0007266,GO:0016020,GO:0035023,GO:0048365,GO:1901164,GO:2000249	GTPase activity|Rho GDP-dissociation inhibitor activity|GTPase activator activity|cytosol|Rho protein signal transduction|membrane|regulation of Rho protein signal transduction|Rac GTPase binding|negative regulation of trophoblast cell migration|regulation of actin cytoskeleton reorganization	oas04722,oas04962	Neurotrophin signaling pathway|Vasopressin-regulated water reabsorption
ARHGEF39	16.0015	22.8349	9.16814	0.400712	-1.31936	0.0211265	0.0775673	Down	0.186088	0.248365	0.114081	0.293906	0.557527	0.426293	GeneID:101115939	Rho guanine nucleotide exchange factor 39	GO:0005089,GO:0005886,GO:0030335,GO:0035023	Rho guanyl-nucleotide exchange factor activity|plasma membrane|positive regulation of cell migration|regulation of Rho protein signal transduction
ARHGEF9	156.547	216.054	97.0405	0.449416	-1.15388	1.00133e-09	3.97412e-08	Down	0.311354	0.267405	0.360951	0.646212	0.675917	0.620357	GeneID:101110030	Cdc42 guanine nucleotide exchange factor 9	GO:0005089,GO:0005829,GO:0014069,GO:0030054,GO:0035023,GO:0045211,GO:0098982,GO:0099150	Rho guanyl-nucleotide exchange factor activity|cytosol|postsynaptic density|cell junction|regulation of Rho protein signal transduction|postsynaptic membrane|GABA-ergic synapse|regulation of postsynaptic specialization assembly
ARTN	12.5468	17.8995	7.19405	0.402696	-1.31224	0.0485526	0.1461	Down	0.0549734	0.032251	0.0962901	0.148843	0.0756288	0.196261	GeneID:105607299	artemin	GO:0000165,GO:0005088,GO:0005102,GO:0005576,GO:0005615,GO:0005622,GO:0007165,GO:0007405,GO:0007411,GO:0007422,GO:0008083,GO:0050930,GO:0061146,GO:0097021	MAPK cascade|Ras guanyl-nucleotide exchange factor activity|signaling receptor binding|extracellular region|extracellular space|intracellular|signal transduction|neuroblast proliferation|axon guidance|peripheral nervous system development|growth factor activity|induction of positive chemotaxis|Peyer's patch morphogenesis|lymphocyte migration into lymphoid organs
ASB9	110.148	46.3977	173.899	3.74917	1.90657	2.17711e-14	2.00351e-12	Up	2.6625	2.74976	3.49767	0.800979	0.898763	0.511575	GeneID:101123093	ankyrin repeat and SOCS box containing 9	GO:0005739,GO:0016567,GO:0035556,GO:0045732	mitochondrion|protein ubiquitination|intracellular signal transduction|positive regulation of protein catabolic process
ASF1B	99.2583	134.555	63.9615	0.475125	-1.07362	2.09663e-05	0.000256707	Down	1.16161	1.13369	0.659378	2.0385	1.94881	1.80688	GeneID:101123293	anti-silencing function 1B histone chaperone	GO:0000790,GO:0001835,GO:0005654,GO:0006335,GO:0006336,GO:0032991,GO:0042393	nuclear chromatin|blastocyst hatching|nucleoplasm|DNA replication-dependent nucleosome assembly|DNA replication-independent nucleosome assembly|protein-containing complex|histone binding
ASGR1	26.4092	36.5275	16.2908	0.44422	-1.17065	0.0312139	0.104736	Down	0.174519	0.609186	0.124821	0.826903	0.429497	0.654203	GeneID:101116157	asialoglycoprotein receptor 1	GO:0006897,GO:0016021,GO:0030246,GO:0046872	endocytosis|integral component of membrane|carbohydrate binding|metal ion binding	oas04918	Thyroid hormone synthesis
ASIC3	3.98292	7.02169	0.944153	0.134408	-2.89531	0.0248567	0.0879354	Down	0.0140957	0.0144716	0.0144024	0.148419	0.0301653	0.117421	GeneID:101113062	acid sensing ion channel subunit 3	GO:0005261,GO:0005272,GO:0005886,GO:0005887,GO:0007165,GO:0007600,GO:0009408,GO:0010447,GO:0034220,GO:0042931,GO:0044736,GO:0048471,GO:0050915,GO:0050965,GO:0050966,GO:0050968	cation channel activity|sodium channel activity|plasma membrane|integral component of plasma membrane|signal transduction|sensory perception|response to heat|response to acidic pH|ion transmembrane transport|enterobactin transmembrane transporter activity|acid-sensing ion channel activity|perinuclear region of cytoplasm|sensory perception of sour taste|detection of temperature stimulus involved i…	oas04750	Inflammatory mediator regulation of TRP channels
ASPN	1560.03	2205.61	914.449	0.414533	-1.27044	4.5803e-21	1.10735e-18	Down	10.4964	11.1168	7.12654	20.7584	21.9615	21.8796	GeneID:101108885	asporin	GO:0005509,GO:0005518,GO:0030282,GO:0030512,GO:0031012,GO:0070171	calcium ion binding|collagen binding|bone mineralization|negative regulation of transforming growth factor beta receptor signaling pathway|extracellular matrix|negative regulation of tooth mineralization
ATCAY	23.0463	9.83624	36.2565	3.68435	1.88141	9.63601e-05	0.000952516	Up	0.2173	0.259272	0.210025	0.0680221	0.0502733	0.0550386	GeneID:101116652	ATCAY kinesin light chain interacting caytaxin	GO:0004309,GO:0005737,GO:0006798,GO:0006915,GO:0019894,GO:0030054,GO:0030424,GO:0030425,GO:0031175,GO:0031966,GO:0032880,GO:0043005,GO:0045202,GO:0048311,GO:0050699,GO:2000212	exopolyphosphatase activity|cytoplasm|polyphosphate catabolic process|apoptotic process|kinesin binding|cell junction|axon|dendrite|neuron projection development|mitochondrial membrane|regulation of protein localization|neuron projection|synapse|mitochondrion distribution|WW domain binding|negative regulation of glutamate metabolic process
ATP10A	286.216	422.408	150.024	0.355199	-1.4933	1.34557e-19	2.52543e-17	Down	0.846238	0.805618	0.833204	2.41388	2.37622	1.71962	GeneID:101107997	ATPase phospholipid transporting 10A (putative)	GO:0000287,GO:0004012,GO:0005524,GO:0005783,GO:0005789,GO:0005886,GO:0016021,GO:0045332	magnesium ion binding|phospholipid-translocating ATPase activity|ATP binding|endoplasmic reticulum|endoplasmic reticulum membrane|plasma membrane|integral component of membrane|phospholipid translocation
ATP13A4	7.73934	12.6623	2.81634	0.223048	-2.16457	0.0137507	0.0559123	Down	0.0244836	0.0125683	0.0187622	0.0708939	0.130989	0.0318679	GeneID:101107059	ATPase 13A4	GO:0005524,GO:0005886,GO:0006874,GO:0016021,GO:0019829,GO:0034220,GO:0046872	ATP binding|plasma membrane|cellular calcium ion homeostasis|integral component of membrane|cation-transporting ATPase activity|ion transmembrane transport|metal ion binding
ATP2B3	36.9168	50.1822	23.6514	0.470859	-1.08663	0.00830869	0.0373629	Down	0.106071	0.121465	0.0833681	0.128868	0.174612	0.310109	GeneID:101101873	ATPase plasma membrane Ca2+ transporting 3	GO:0003407,GO:0005388,GO:0005516,GO:0005524,GO:0005887,GO:0006874,GO:0007420,GO:0030165,GO:0045121,GO:0046872,GO:0051480,GO:0098688,GO:0098978,GO:0099056	neural retina development|calcium-transporting ATPase activity|calmodulin binding|ATP binding|integral component of plasma membrane|cellular calcium ion homeostasis|brain development|PDZ domain binding|membrane raft|metal ion binding|regulation of cytosolic calcium ion concentration|parallel fiber to Purkinje cell synapse|glutamatergic synapse|integral component of presynaptic membrane	oas04020,oas04022,oas04024,oas04261,oas04925,oas04970,oas04972	Calcium signaling pathway|cGMP-PKG signaling pathway|cAMP signaling pathway|Adrenergic signaling in cardiomyocytes|Aldosterone synthesis and secretion|Salivary secretion|Pancreatic secretion
AURKC	39.4472	59.3856	19.5088	0.32849	-1.60608	1.03043e-05	0.00013827	Down	0.395121	0.370383	0.315952	1.17575	1.04777	0.840753	GeneID:101104774	aurora kinase C	GO:0000780,GO:0000793,GO:0004672,GO:0004712,GO:0005524,GO:0005737,GO:0005819,GO:0005876,GO:0006468,GO:0007052,GO:0007283,GO:0008608,GO:0016570,GO:0030496,GO:0031616,GO:0032133,GO:0032465,GO:0032467,GO:0035174,GO:0048599,GO:0051233,GO:0051256,GO:0051301,GO:0051321	condensed nuclear chromosome, centromeric region|condensed chromosome|protein kinase activity|protein serine/threonine/tyrosine kinase activity|ATP binding|cytoplasm|spindle|spindle microtubule|protein phosphorylation|mitotic spindle organization|spermatogenesis|attachment of spindle microtubules to kinetochore|histone modification|midbody|spindle pole centrosome|chromosome passenger complex|regu…
AXIN2	44.6002	71.6919	17.5085	0.244919	-2.02962	4.57487e-08	1.20844e-06	Down	0.162675	0.0765476	0.145437	0.528131	0.551205	0.381128	GeneID:101109815	axin 2			oas04310,oas04390,oas04550,oas04934,oas05165,oas05200,oas05210,oas05213,oas05217,oas05224,oas05225,oas05226	Wnt signaling pathway|Hippo signaling pathway|Signaling pathways regulating pluripotency of stem cells|Cushing syndrome|Human papillomavirus infection|Pathways in cancer|Colorectal cancer|Endometrial cancer|Basal cell carcinoma|Breast cancer|Hepatocellular carcinoma|Gastric cancer
BCO2	494.121	321.092	667.15	2.07819	1.05533	2.68392e-16	3.22812e-14	Up	8.30043	7.23456	9.51294	3.64259	3.95013	3.60229	GeneID:100286796	beta-carotene oxygenase 2	GO:0001523,GO:0003834,GO:0004744,GO:0005622,GO:0005739,GO:0005759,GO:0010436,GO:0016116,GO:0016119,GO:0016121,GO:0016122,GO:0016702,GO:0042573,GO:0042574,GO:0046872,GO:0051881,GO:0055114,GO:0102076,GO:2000377	retinoid metabolic process|beta-carotene 15,15'-monooxygenase activity|retinal isomerase activity|intracellular|mitochondrion|mitochondrial matrix|carotenoid dioxygenase activity|carotenoid metabolic process|carotene metabolic process|carotene catabolic process|xanthophyll metabolic process|oxidoreductase activity, acting on single donors with incorporation of molecular oxygen, incorporation of t…
BEST2	13.7792	23.2137	4.3447	0.188281	-2.40904	0.00167634	0.010181	Down	0.122478	0.0139716	0.0556188	0.544502	0.305791	0.0991932	GeneID:101123465	bestrophin 2	GO:0005254,GO:0005886,GO:0005929,GO:0006821,GO:0007608,GO:0034707,GO:0051899,GO:1902476	chloride channel activity|plasma membrane|cilium|chloride transport|sensory perception of smell|chloride channel complex|membrane depolarization|chloride transmembrane transport	oas04970	Salivary secretion
BMP4	2103.91	2872.13	1335.69	0.465067	-1.10449	5.73628e-36	5.84445e-33	Down	20.5234	19.0779	18.945	41.533	39.6797	35.858	GeneID:443502	bone morphogenetic protein 4	GO:0000122,GO:0000186,GO:0001649,GO:0001658,GO:0001822,GO:0001823,GO:0001843,GO:0001938,GO:0001958,GO:0002043,GO:0002062,GO:0002244,GO:0002320,GO:0003014,GO:0003130,GO:0003139,GO:0003148,GO:0003149,GO:0003180,GO:0003184,GO:0003197,GO:0003323,GO:0003337,GO:0005125,GO:0005160,GO:0005615,GO:0007182,GO:0007224,GO:0007281,GO:0007492,GO:0007500,GO:0008083,GO:0008201,GO:0008284,GO:0009791,GO:0009948,GO:…	negative regulation of transcription by RNA polymerase II|activation of MAPKK activity|osteoblast differentiation|branching involved in ureteric bud morphogenesis|kidney development|mesonephros development|neural tube closure|positive regulation of endothelial cell proliferation|endochondral ossification|blood vessel endothelial cell proliferation involved in sprouting angiogenesis|chondrocyte di…	oas04060,oas04350,oas04390,oas04550,oas04919,oas05200,oas05217,oas05418	Cytokine-cytokine receptor interaction|TGF-beta signaling pathway|Hippo signaling pathway|Signaling pathways regulating pluripotency of stem cells|Thyroid hormone signaling pathway|Pathways in cancer|Basal cell carcinoma|Fluid shear stress and atherosclerosis
BMP6	341.803	545.867	137.74	0.252361	-1.98644	4.04152e-06	6.11977e-05	Down	2.15995	1.34892	0.915319	4.9049	4.17503	7.20339	GeneID:443174	bone morphogenetic protein 6	GO:0000122,GO:0001503,GO:0001649,GO:0001654,GO:0001822,GO:0001938,GO:0001958,GO:0003323,GO:0005125,GO:0005160,GO:0005615,GO:0005737,GO:0006879,GO:0006954,GO:0006955,GO:0008083,GO:0010039,GO:0010862,GO:0014823,GO:0030501,GO:0030509,GO:0030539,GO:0031666,GO:0031982,GO:0032026,GO:0032332,GO:0032349,GO:0032526,GO:0042981,GO:0043408,GO:0045595,GO:0045603,GO:0045666,GO:0045669,GO:0045944,GO:0046982,GO:…	negative regulation of transcription by RNA polymerase II|ossification|osteoblast differentiation|eye development|kidney development|positive regulation of endothelial cell proliferation|endochondral ossification|type B pancreatic cell development|cytokine activity|transforming growth factor beta receptor binding|extracellular space|cytoplasm|cellular iron ion homeostasis|inflammatory response|im…	oas04060,oas04350,oas04390,oas04913	Cytokine-cytokine receptor interaction|TGF-beta signaling pathway|Hippo signaling pathway|Ovarian steroidogenesis
BUB1B	39.024	18.9737	59.0743	3.11676	1.64005	9.43162e-05	0.00093751	Up	0.554922	0.255643	0.552454	0.194765	0.0989624	0.111121	GeneID:101108313	BUB1 mitotic checkpoint serine/threonine kinase B			oas04110,oas05166	Cell cycle|Human T-cell leukemia virus 1 infection
C12H1orf158	5.88187	9.84657	1.91716	0.193164	-2.3721	0.0210746	0.0774164	Down	0.0259207	0.106447	0.0264845	0.382098	0.277355	0.107963	GeneID:101116074	chromosome 12 C1orf158 homolog
C19H3orf49	69.4177	43.9081	94.9272	2.16226	1.11254	5.57362e-05	0.00059776	Up	1.01058	0.953683	1.16815	0.354689	0.524281	0.467685	GeneID:101119763	chromosome 19 C3orf49 homolog
C1H1orf162	7.53989	11.9485	3.13132	0.262699	-1.92852	0.020271	0.0749119	Down	0.0425372	0.0291143	0.0724375	0.194085	0.182062	0.132879	GeneID:101114830	chromosome 1 C1orf162 homolog	GO:0016021	integral component of membrane
C1QTNF3	114.246	185.766	42.7246	0.230116	-2.11957	4.95991e-19	8.95546e-17	Down	0.408445	0.349447	0.41733	1.6217	1.31113	1.80755	GeneID:101113100	C1q and TNF related 3	GO:0005581,GO:0005623,GO:0010629,GO:0016020,GO:0035356,GO:0045444,GO:0045721,GO:0050715,GO:0050728,GO:0070062,GO:0070165,GO:0070206,GO:0071638,GO:1900165,GO:1901223	collagen trimer|cell|negative regulation of gene expression|membrane|cellular triglyceride homeostasis|fat cell differentiation|negative regulation of gluconeogenesis|positive regulation of cytokine secretion|negative regulation of inflammatory response|extracellular exosome|positive regulation of adiponectin secretion|protein trimerization|negative regulation of monocyte chemotactic protein-1 pr…
C1QTNF6	64.3448	34.4045	94.285	2.74028	1.45432	4.61591e-06	6.90885e-05	Up	0.78854	0.839185	1.30679	0.273384	0.28811	0.430572	GeneID:101102801	C1q and TNF related 6	GO:0005581,GO:0005615,GO:0042802,GO:0070208	collagen trimer|extracellular space|identical protein binding|protein heterotrimerization
C7H15orf48	114.737	55.8648	173.609	3.10735	1.63569	3.12896e-08	8.66631e-07	Up	4.67913	7.20586	9.64021	1.37304	3.03688	2.03678	GeneID:101114276	chromosome 7 C15orf48 homolog	GO:0005634,GO:0005751,GO:0022900,GO:1902600	nucleus|mitochondrial respiratory chain complex IV|electron transport chain|proton transmembrane transport
CA11	83.2921	26.3435	140.241	5.32361	2.41241	2.11637e-18	3.55151e-16	Up	3.18158	2.89895	2.92571	0.418748	0.595759	0.559055	GeneID:443426	carbonic anhydrase 11	GO:0005576,GO:0008270	extracellular region|zinc ion binding
CA13	32.2139	43.5969	20.8309	0.477435	-1.06662	0.0226286	0.0817977	Down	0.253272	0.269657	0.10543	0.602496	0.411527	0.214889	GeneID:101113860	carbonic anhydrase 13	GO:0004089,GO:0005829,GO:0008270,GO:0043209,GO:0043231	carbonate dehydratase activity|cytosol|zinc ion binding|myelin sheath|intracellular membrane-bounded organelle	oas00910	Nitrogen metabolism
CA9	14.3207	21.455	7.18651	0.335837	-1.57417	0.0194125	0.072563	Down	0.0799986	0.0315892	0.031438	0.110151	0.230461	0.0576699	GeneID:101115682	carbonic anhydrase 9	GO:0002009,GO:0004089,GO:0005730,GO:0005886,GO:0008270,GO:0015701,GO:0016021,GO:0016323,GO:0031528,GO:0033574,GO:0042493,GO:0046903,GO:0061418	morphogenesis of an epithelium|carbonate dehydratase activity|nucleolus|plasma membrane|zinc ion binding|bicarbonate transport|integral component of membrane|basolateral plasma membrane|microvillus membrane|response to testosterone|response to drug|secretion|regulation of transcription from RNA polymerase II promoter in response to hypoxia	oas00910	Nitrogen metabolism
CABP1	6.33722	9.83521	2.83922	0.288293	-1.79439	0.0489724	0.146969	Down	0.00362462	0.0111638	0.0185173	0.0267153	0.0426624	0.0377425	GeneID:101112516	calcium binding protein 1	GO:0005509,GO:0005794,GO:0005856,GO:0007601,GO:0008139,GO:0014069,GO:0030054,GO:0042308,GO:0045211,GO:0048306,GO:0048471,GO:0050896	calcium ion binding|Golgi apparatus|cytoskeleton|visual perception|nuclear localization sequence binding|postsynaptic density|cell junction|negative regulation of protein import into nucleus|postsynaptic membrane|calcium-dependent protein binding|perinuclear region of cytoplasm|response to stimulus
CABP5	3.63751	6.31475	0.96027	0.150478	-2.73237	0.0398129	0.126282	Down	0	0.0300676	0.0149618	0.0616736	0.0626742	0.152478	GeneID:101120597	calcium binding protein 5	GO:0005509,GO:0005829	calcium ion binding|cytosol
CADM4	12.7196	20.7058	4.7335	0.228233	-2.13142	0.00261349	0.0146594	Down	0.061971	0.0763482	0.0506552	0.313206	0.0928338	0.361363	GeneID:101107547	cell adhesion molecule 4	GO:0007155,GO:0016021	cell adhesion|integral component of membrane
CALML6	25.7256	34.7782	16.673	0.479399	-1.0607	0.0137911	0.0559489	Down	0.423001	0.372241	0.288135	0.636274	0.775916	0.692156	GeneID:101123572	calmodulin like 6	GO:0005509,GO:0005634,GO:0005737,GO:0019722,GO:0030234,GO:0051300	calcium ion binding|nucleus|cytoplasm|calcium-mediated signaling|enzyme regulator activity|spindle pole body organization	oas04014,oas04015,oas04020,oas04022,oas04024,oas04070,oas04114,oas04218,oas04261,oas04270,oas04371,oas04625,oas04713,oas04720,oas04722,oas04728,oas04740,oas04744,oas04750,oas04910,oas04912,oas04915,oas04916,oas04921,oas04922,oas04924,oas04925,oas04970,oas04971,oas05010,oas05031,oas05034,oas05133,oas05152,oas05163,oas05167,oas05170,oas05200,oas05214,oas05418	Ras signaling pathway|Rap1 signaling pathway|Calcium signaling pathway|cGMP-PKG signaling pathway|cAMP signaling pathway|Phosphatidylinositol signaling system|Oocyte meiosis|Cellular senescence|Adrenergic signaling in cardiomyocytes|Vascular smooth muscle contraction|Apelin signaling pathway|C-type lectin receptor signaling pathway|Circadian entrainment|Long-term potentiation|Neurotrophin signali…
CASQ2	46.1374	20.7111	71.5636	3.45121	1.7871	7.37418e-06	0.000103938	Up	0.695994	1.11843	0.505008	0.148691	0.194276	0.283588	GeneID:101105292	calsequestrin 2	GO:0005509,GO:0010880,GO:0014809,GO:0016529,GO:0030018,GO:0033018,GO:0060315	calcium ion binding|regulation of release of sequestered calcium ion into cytosol by sarcoplasmic reticulum|regulation of skeletal muscle contraction by regulation of release of sequestered calcium ion|sarcoplasmic reticulum|Z disc|sarcoplasmic reticulum lumen|negative regulation of ryanodine-sensitive calcium-release channel activity
CASS4	104.521	140.892	68.1503	0.483266	-1.04911	1.00007e-05	0.000134703	Down	0.358638	0.511737	0.465813	0.768043	1.02116	0.784862	GeneID:101105178	Cas scaffold protein family member 4	GO:0005737,GO:0005856,GO:0005925,GO:0007155,GO:0016477,GO:0030335,GO:0061098,GO:0090527,GO:1900026	cytoplasm|cytoskeleton|focal adhesion|cell adhesion|cell migration|positive regulation of cell migration|positive regulation of protein tyrosine kinase activity|actin filament reorganization|positive regulation of substrate adhesion-dependent cell spreading
CCDC160	10.0391	4.90814	15.1701	3.08602	1.62575	0.0433188	0.134215	Up	0.339113	0.456955	0.238212	0.111582	0	0.198625	GeneID:101108991	coiled-coil domain containing 160
CCDC3	47.1432	74.5305	19.7558	0.264058	-1.92107	1.49405e-05	0.000190278	Down	0.143856	0.400877	0.104989	0.757351	1.0665	0.481481	GeneID:101109471	coiled-coil domain containing 3	GO:0005576,GO:0005783,GO:0010804,GO:0045600,GO:0046889	extracellular region|endoplasmic reticulum|negative regulation of tumor necrosis factor-mediated signaling pathway|positive regulation of fat cell differentiation|positive regulation of lipid biosynthetic process
CCDC33	82.1029	128.324	35.882	0.279013	-1.8416	1.02343e-06	1.85964e-05	Down	0.371801	0.676181	0.173663	1.46526	1.81866	0.818543	GeneID:101120277	coiled-coil domain containing 33
CCDC69	177.689	105.005	250.373	2.38366	1.25318	9.67312e-12	5.82943e-10	Up	1.31371	1.50904	1.52933	0.510213	0.547296	0.639119	GeneID:101111284	coiled-coil domain containing 69	GO:0005634,GO:0005737,GO:0008017,GO:0030496,GO:0051233,GO:0051255	nucleus|cytoplasm|microtubule binding|midbody|spindle midzone|spindle midzone assembly
CCDC89	171.392	229.793	112.99	0.491255	-1.02546	1.58846e-07	3.64859e-06	Down	1.01711	1.38902	1.08825	2.4753	2.23824	1.90837	GeneID:101104101	coiled-coil domain containing 89	GO:0005634,GO:0005737	nucleus|cytoplasm
CCIN	49.4161	74.5127	24.3196	0.325896	-1.61752	3.25793e-06	5.1236e-05	Down	0.185717	0.254225	0.166037	0.684414	0.637559	0.410939	GeneID:101110996	calicin	GO:0005856,GO:0007275,GO:0007283,GO:0030154,GO:0033150	cytoskeleton|multicellular organism development|spermatogenesis|cell differentiation|cytoskeletal calyx
CCL5	3.96219	6.67201	1.25237	0.188177	-2.40984	0.0484891	0.14601	Down	0.0689862	0.0354129	0.0352434	0.0726378	0.332173	0.287336	GeneID:101115553	C-C motif chemokine ligand 5	GO:0000165,GO:0002548,GO:0004435,GO:0004672,GO:0005615,GO:0005737,GO:0006816,GO:0006874,GO:0006887,GO:0006954,GO:0007159,GO:0007186,GO:0007267,GO:0008009,GO:0009615,GO:0009636,GO:0010759,GO:0010820,GO:0014068,GO:0014911,GO:0016004,GO:0030298,GO:0030593,GO:0031328,GO:0031584,GO:0031663,GO:0031726,GO:0031729,GO:0031730,GO:0033634,GO:0034112,GO:0042056,GO:0042102,GO:0042119,GO:0042531,GO:0042803,GO:…	MAPK cascade|monocyte chemotaxis|phosphatidylinositol phospholipase C activity|protein kinase activity|extracellular space|cytoplasm|calcium ion transport|cellular calcium ion homeostasis|exocytosis|inflammatory response|leukocyte cell-cell adhesion|G protein-coupled receptor signaling pathway|cell-cell signaling|chemokine activity|response to virus|response to toxic substance|positive regulation…	oas04060,oas04062,oas04620,oas04621,oas04623,oas04668,oas05020,oas05142,oas05163,oas05164,oas05168,oas05323	Cytokine-cytokine receptor interaction|Chemokine signaling pathway|Toll-like receptor signaling pathway|NOD-like receptor signaling pathway|Cytosolic DNA-sensing pathway|TNF signaling pathway|Prion diseases|Chagas disease (American trypanosomiasis)|Human cytomegalovirus infection|Influenza A|Herpes simplex virus 1 infection|Rheumatoid arthritis
CCN3	25.2027	46.0311	4.37433	0.0954689	-3.38882	1.30109e-09	5.00234e-08	Down	0.0469106	0.0240808	0.0958622	0.543331	0.61489	0.464048	GeneID:101113859;GeneID:114116377	cellular communication network factor 3	GO:0001525,GO:0002062,GO:0005112,GO:0005178,GO:0005520,GO:0005576,GO:0005737,GO:0005921,GO:0007155,GO:0008083,GO:0008201,GO:0010468,GO:0010761,GO:0010832,GO:0014909,GO:0030308,GO:0030424,GO:0030425,GO:0031012,GO:0033627,GO:0035767,GO:0043025,GO:0043231,GO:0044342,GO:0045747,GO:0046676,GO:0048659,GO:0050728,GO:0060326,GO:0060392,GO:0060548,GO:0061484,GO:0062023,GO:0071603,GO:0090027,GO:1901223,GO:…	angiogenesis|chondrocyte differentiation|Notch binding|integrin binding|insulin-like growth factor binding|extracellular region|cytoplasm|gap junction|cell adhesion|growth factor activity|heparin binding|regulation of gene expression|fibroblast migration|negative regulation of myotube differentiation|smooth muscle cell migration|negative regulation of cell growth|axon|dendrite|extracellular matri…
CCR7	155.235	214.806	95.6647	0.445354	-1.16698	4.47997e-05	0.000496907	Down	0.779024	0.655473	0.371054	1.65902	1.39764	0.725795	GeneID:101109462	C-C motif chemokine receptor 7	GO:0005622,GO:0006935,GO:0006954,GO:0006955,GO:0007204,GO:0009897,GO:0016021,GO:0016493,GO:0019722,GO:0019956,GO:0019957,GO:0035757,GO:0035758,GO:0038117,GO:0060326	intracellular|chemotaxis|inflammatory response|immune response|positive regulation of cytosolic calcium ion concentration|external side of plasma membrane|integral component of membrane|C-C chemokine receptor activity|calcium-mediated signaling|chemokine binding|C-C chemokine binding|chemokine (C-C motif) ligand 19 binding|chemokine (C-C motif) ligand 21 binding|C-C motif chemokine 19 receptor ac…	oas04060,oas04062	Cytokine-cytokine receptor interaction|Chemokine signaling pathway
CD200R1	24.1718	11.5837	36.7598	3.17309	1.66589	0.000641646	0.00461313	Up	0.368969	0.391028	0.656701	0.125322	0.101884	0.185903	GeneID:101122319	CD200 receptor 1	GO:0009897,GO:0016021,GO:0038023	external side of plasma membrane|integral component of membrane|signaling receptor activity	oas05167	Kaposi sarcoma-associated herpesvirus infection
CD24	5.37737	9.48962	1.26511	0.132887	-2.91173	0.0101225	0.0437141	Down	0.0283581	0.0291143	0	0.223944	0.0910309	0.0885863	GeneID:101119731	CD24 molecule			oas04640	Hematopoietic cell lineage
CD244	5.61941	1.05191	10.1869	9.6546	3.27122	0.00695927	0.0324588	Up	0.028267	0.130593	0.0722047	0	0.00756153	0.0147169	GeneID:101121900	CD244 molecule	GO:0002250,GO:0002323,GO:0005886,GO:0007165,GO:0009897,GO:0016021,GO:0038023,GO:0042288,GO:0045087,GO:0050900,GO:0060732,GO:0071663,GO:1902715,GO:2000484	adaptive immune response|natural killer cell activation involved in immune response|plasma membrane|signal transduction|external side of plasma membrane|integral component of membrane|signaling receptor activity|MHC class I protein binding|innate immune response|leukocyte migration|positive regulation of inositol phosphate biosynthetic process|positive regulation of granzyme B production|positive…	oas04650	Natural killer cell mediated cytotoxicity
CD8B	13.3993	7.36022	19.4384	2.64026	1.40068	0.0399278	0.126506	Up	0.476304	0.312963	0.408798	0.0601818	0.0611583	0.29758	GeneID:101103712	CD8b molecule	GO:0002250,GO:0005886,GO:0016021	adaptive immune response|plasma membrane|integral component of membrane	oas04514,oas04612,oas04640,oas04660,oas05340	Cell adhesion molecules (CAMs)|Antigen processing and presentation|Hematopoietic cell lineage|T cell receptor signaling pathway|Primary immunodeficiency
CDC6	39.6173	54.7409	24.4936	0.447604	-1.15971	0.00344285	0.0182765	Down	0.281492	0.23548	0.30892	0.450076	0.390445	0.868479	GeneID:101107536	cell division cycle 6			oas04110	Cell cycle
CDH17	28.8498	40.4094	17.2902	0.428015	-1.22427	0.00302209	0.0164406	Down	0.162515	0.149285	0.16605	0.423289	0.329482	0.285008	GeneID:101111295	cadherin 17			oas05226	Gastric cancer
CDH6	839.329	199.906	1478.75	7.39689	2.88692	2.1513e-07	4.78342e-06	Up	4.29302	5.8934	5.36227	0.405004	0.373208	1.17102	GeneID:101116091	cadherin 6	GO:0005509,GO:0005886,GO:0005913,GO:0007043,GO:0007156,GO:0007219,GO:0008092,GO:0009986,GO:0016021,GO:0016339,GO:0016342,GO:0034332,GO:0042803,GO:0044331,GO:0045296,GO:0098609	calcium ion binding|plasma membrane|cell-cell adherens junction|cell-cell junction assembly|homophilic cell adhesion via plasma membrane adhesion molecules|Notch signaling pathway|cytoskeletal protein binding|cell surface|integral component of membrane|calcium-dependent cell-cell adhesion via plasma membrane cell adhesion molecules|catenin complex|adherens junction organization|protein homodimeri…
CDO1	154.203	221.62	86.7851	0.391633	-1.35243	2.10728e-11	1.1429e-09	Down	1.92064	1.61657	1.30828	3.51626	3.83252	4.16202	GeneID:101102489	cysteine dioxygenase type 1	GO:0005506,GO:0017172,GO:0042412	iron ion binding|cysteine dioxygenase activity|taurine biosynthetic process	oas00270,oas00430	Cysteine and methionine metabolism|Taurine and hypotaurine metabolism
CDSN	20.7524	12.2886	29.2162	2.37765	1.24954	0.0120961	0.050509	Up	0.396877	0.302983	0.259942	0.0857199	0.130666	0.158946	GeneID:101109128	corneodesmosin	GO:0005576,GO:0042803,GO:0043589,GO:0098609	extracellular region|protein homodimerization activity|skin morphogenesis|cell-cell adhesion
CELSR2	18.4607	30.2546	6.66678	0.219624	-2.18689	0.00102137	0.00676674	Down	0.0126703	0.028618	0.0129459	0.117401	0.0949021	0.0184707	GeneID:101103606	cadherin EGF LAG seven-pass G-type receptor 2	GO:0004930,GO:0005509,GO:0005737,GO:0005886,GO:0006355,GO:0007156,GO:0007186,GO:0016021,GO:0016055,GO:0021999,GO:0022407,GO:0048813,GO:0060071	G protein-coupled receptor activity|calcium ion binding|cytoplasm|plasma membrane|regulation of transcription, DNA-templated|homophilic cell adhesion via plasma membrane adhesion molecules|G protein-coupled receptor signaling pathway|integral component of membrane|Wnt signaling pathway|neural plate anterior/posterior regionalization|regulation of cell-cell adhesion|dendrite morphogenesis|Wnt sign…
CENPA	8.17948	12.2903	4.06871	0.331795	-1.59163	0.039828	0.126302	Down	0.0880553	0.0452017	0.0599805	0.154527	0.172738	0.213944	GeneID:101110750	centromere protein A	GO:0000777,GO:0000786,GO:0005634,GO:0006334,GO:0031492,GO:0046982	condensed chromosome kinetochore|nucleosome|nucleus|nucleosome assembly|nucleosomal DNA binding|protein heterodimerization activity
CENPBD1	21.6523	14.4093	28.8953	2.00636	1.00458	0.0379745	0.121765	Up	0.257503	0.194798	0.180018	0.135566	0.08701	0.0705611	GeneID:101113004	CENPB DNA-binding domain containing 1	GO:0003677,GO:0005634	DNA binding|nucleus
CERS3	51.6338	71.332	31.9356	0.448439	-1.15702	0.000586374	0.00429365	Down	0.240592	0.152563	0.339817	0.521554	0.567875	0.427363	GeneID:101110093	ceramide synthase 3	GO:0000981,GO:0003677,GO:0005783,GO:0005789,GO:0016021,GO:0030148,GO:0030216,GO:0031965,GO:0046513,GO:0050291	DNA-binding transcription factor activity, RNA polymerase II-specific|DNA binding|endoplasmic reticulum|endoplasmic reticulum membrane|integral component of membrane|sphingolipid biosynthetic process|keratinocyte differentiation|nuclear membrane|ceramide biosynthetic process|sphingosine N-acyltransferase activity	oas00600,oas04071	Sphingolipid metabolism|Sphingolipid signaling pathway
CFB	1937.33	2788.99	1085.68	0.389256	-1.36121	0.00630689	0.0299672	Down	7.96937	19.8703	9.24074	33.4976	34.4965	21.2167	GeneID:101115072	complement factor B	GO:0004252,GO:0005576,GO:0006957	serine-type endopeptidase activity|extracellular region|complement activation, alternative pathway	oas04610,oas05150	Complement and coagulation cascades|Staphylococcus aureus infection
CHADL	4.48692	7.72146	1.25237	0.162599	-2.62061	0.0275693	0.0955413	Down	0.0189563	0.00973092	0.00968435	0.0997987	0.0202836	0.0986944	GeneID:105614872	chondroadherin like	GO:0005518,GO:0005615,GO:0030021,GO:0031012,GO:0032331,GO:0062023,GO:0098633,GO:1904027	collagen binding|extracellular space|extracellular matrix structural constituent conferring compression resistance|extracellular matrix|negative regulation of chondrocyte differentiation|collagen-containing extracellular matrix|collagen fibril binding|negative regulation of collagen fibril organization
CHRD	6.19156	10.1926	2.19055	0.215523	-2.21409	0.0224448	0.0812803	Down	0.00790747	0.00811833	0.0403974	0.0999123	0.0846111	0.0576373	GeneID:443243	chordin	GO:0001501,GO:0001649,GO:0001702,GO:0001707,GO:0002053,GO:0005615,GO:0008201,GO:0019955,GO:0021919,GO:0030336,GO:0030514,GO:0030900,GO:0033504,GO:0045545,GO:0045668,GO:0045785	skeletal system development|osteoblast differentiation|gastrulation with mouth forming second|mesoderm formation|positive regulation of mesenchymal cell proliferation|extracellular space|heparin binding|cytokine binding|BMP signaling pathway involved in spinal cord dorsal/ventral patterning|negative regulation of cell migration|negative regulation of BMP signaling pathway|forebrain development|fl…	oas04350	TGF-beta signaling pathway
CHRDL1	12.5107	19.6715	5.34994	0.271902	-1.87884	0.00329688	0.0176394	Down	0.0484296	0.0426181	0.0282761	0.131125	0.140655	0.136878	GeneID:101113311	chordin like 1	GO:0001503,GO:0001654,GO:0005576,GO:0005788,GO:0007399,GO:0030154,GO:0030509,GO:0030514,GO:0043687,GO:0044267,GO:0048749	ossification|eye development|extracellular region|endoplasmic reticulum lumen|nervous system development|cell differentiation|BMP signaling pathway|negative regulation of BMP signaling pathway|post-translational protein modification|cellular protein metabolic process|compound eye development
CHRM5	70.2166	107.943	32.49	0.30076	-1.73331	2.25298e-07	4.9824e-06	Down	0.382794	0.510901	0.44327	1.62566	1.77491	0.744045	GeneID:101110766	cholinergic receptor muscarinic 5	GO:0001696,GO:0004435,GO:0004930,GO:0004993,GO:0005886,GO:0005887,GO:0007186,GO:0007187,GO:0007197,GO:0007213,GO:0007268,GO:0008283,GO:0015872,GO:0016907,GO:0019226,GO:0030054,GO:0030425,GO:0030594,GO:0045211,GO:0060304	gastric acid secretion|phosphatidylinositol phospholipase C activity|G protein-coupled receptor activity|G protein-coupled serotonin receptor activity|plasma membrane|integral component of plasma membrane|G protein-coupled receptor signaling pathway|G protein-coupled receptor signaling pathway, coupled to cyclic nucleotide second messenger|adenylate cyclase-inhibiting G protein-coupled acetylchol…	oas04020,oas04080,oas04725,oas04810	Calcium signaling pathway|Neuroactive ligand-receptor interaction|Cholinergic synapse|Regulation of actin cytoskeleton
CIDEC	236.88	151.072	322.689	2.13532	1.09445	5.12669e-09	1.69669e-07	Up	3.11342	3.88704	2.9946	1.81112	1.24414	1.30078	GeneID:101102430	cell death inducing DFFA like effector c	GO:0005634,GO:0005783,GO:0005811,GO:0005829,GO:0034389,GO:0097194	nucleus|endoplasmic reticulum|lipid droplet|cytosol|lipid droplet organization|execution phase of apoptosis
CIT	38.44	24.5807	52.2993	2.12678	1.08867	0.00570555	0.0275972	Up	0.126268	0.164205	0.183488	0.0354538	0.0870701	0.0847319	GeneID:101107309	citron rho-interacting serine/threonine kinase	GO:0000086,GO:0000278,GO:0000281,GO:0004674,GO:0005524,GO:0005829,GO:0007030,GO:0008064,GO:0016020,GO:0017048,GO:0017124,GO:0030165,GO:0030496,GO:0031985,GO:0032154,GO:0032467,GO:0035556,GO:0043025,GO:0046872,GO:0048699,GO:0051402,GO:0097110	G2/M transition of mitotic cell cycle|mitotic cell cycle|mitotic cytokinesis|protein serine/threonine kinase activity|ATP binding|cytosol|Golgi organization|regulation of actin polymerization or depolymerization|membrane|Rho GTPase binding|SH3 domain binding|PDZ domain binding|midbody|Golgi cisterna|cleavage furrow|positive regulation of cytokinesis|intracellular signal transduction|neuronal cell…
CKB	7.21242	11.5763	2.84857	0.245282	-2.02749	0.0236943	0.0848118	Down	0.0356825	0.0732681	0.0546881	0.0939282	0.171814	0.352977	GeneID:100190977	creatine kinase B	GO:0004111,GO:0005524,GO:0005615,GO:0005739,GO:0005829,GO:0007420,GO:0030644,GO:0031625,GO:0043209	creatine kinase activity|ATP binding|extracellular space|mitochondrion|cytosol|brain development|cellular chloride ion homeostasis|ubiquitin protein ligase binding|myelin sheath
CLUL1	13.2587	7.01872	19.4987	2.77699	1.47352	0.0192833	0.0721997	Up	0.49075	0.406945	0.289284	0.0993703	0.100983	0.196542	GeneID:101103443	clusterin like 1	GO:0005615,GO:0005634,GO:0051787	extracellular space|nucleus|misfolded protein binding
CNTD2	29.1058	39.7463	18.4654	0.465324	-1.10369	0.0256651	0.0901916	Down	0.185148	0.0988441	0.158907	0.350906	0.427919	0.107963	GeneID:101118980	cyclin N-terminal domain containing 2	GO:0000079,GO:0000278,GO:0000307,GO:0005634,GO:0005737,GO:0006468,GO:0007088,GO:0008284,GO:0016538,GO:0019901,GO:0045787	regulation of cyclin-dependent protein serine/threonine kinase activity|mitotic cell cycle|cyclin-dependent protein kinase holoenzyme complex|nucleus|cytoplasm|protein phosphorylation|regulation of mitotic nuclear division|positive regulation of cell proliferation|cyclin-dependent protein serine/threonine kinase regulator activity|protein kinase binding|positive regulation of cell cycle
CNTN3	5.74919	1.05161	10.4468	9.90842	3.30866	0.00456265	0.0229322	Up	0.0402091	0.0774025	0.0513547	0.00529218	0	0.0104672	GeneID:101113628	contactin 3	GO:0005576,GO:0005886,GO:0007155,GO:0007399,GO:0031225	extracellular region|plasma membrane|cell adhesion|nervous system development|anchored component of membrane
COCH	20.3979	31.6396	9.15618	0.288971	-1.791	0.000744378	0.00521251	Down	0.0521831	0.0982201	0.106636	0.302199	0.353632	0.172068	GeneID:101102269	cochlin
COL18A1	112.341	176.737	47.9449	0.271697	-1.87993	1.77983e-14	1.68129e-12	Down	0.349465	0.208844	0.25048	1.07094	0.904137	0.792957	GeneID:101106232	collagen type XVIII alpha 1 chain	GO:0001525,GO:0001886,GO:0005201,GO:0005576,GO:0005581,GO:0005604,GO:0005615,GO:0005788,GO:0007155,GO:0007601,GO:0008284,GO:0008285,GO:0009887,GO:0030020,GO:0030198,GO:0030335,GO:0031012,GO:0042493,GO:0042802,GO:0046872,GO:0051599,GO:0062023,GO:0070062,GO:2000353	angiogenesis|endothelial cell morphogenesis|extracellular matrix structural constituent|extracellular region|collagen trimer|basement membrane|extracellular space|endoplasmic reticulum lumen|cell adhesion|visual perception|positive regulation of cell proliferation|negative regulation of cell proliferation|animal organ morphogenesis|extracellular matrix structural constituent conferring tensile st…	oas04974	Protein digestion and absorption
COL23A1	11.5613	17.1816	5.9409	0.346421	-1.5294	0.0367541	0.11915	Down	0.0860453	0.0392621	0.0586114	0.110733	0.0716098	0.308613	GeneID:101108307	collagen type XXIII alpha 1 chain	GO:0001525,GO:0001886,GO:0005201,GO:0005581,GO:0005615,GO:0005886,GO:0008201,GO:0009986,GO:0016021,GO:0030198,GO:0031012,GO:0042802,GO:0042803,GO:0070207	angiogenesis|endothelial cell morphogenesis|extracellular matrix structural constituent|collagen trimer|extracellular space|plasma membrane|heparin binding|cell surface|integral component of membrane|extracellular matrix organization|extracellular matrix|identical protein binding|protein homodimerization activity|protein homotrimerization
COL4A6	121.393	78.2609	164.525	2.10092	1.07102	0.00013639	0.00128867	Up	0.651817	0.84428	0.511113	0.267345	0.190583	0.430122	GeneID:101113128	collagen type IV alpha 6 chain	GO:0005201,GO:0005576,GO:0005587,GO:0005615,GO:0005788,GO:0007155,GO:0030020,GO:0030198,GO:0031012,GO:0038063,GO:0062023	extracellular matrix structural constituent|extracellular region|collagen type IV trimer|extracellular space|endoplasmic reticulum lumen|cell adhesion|extracellular matrix structural constituent conferring tensile strength|extracellular matrix organization|extracellular matrix|collagen-activated tyrosine kinase receptor signaling pathway|collagen-containing extracellular matrix	oas04151,oas04510,oas04512,oas04926,oas04933,oas04974,oas05146,oas05165,oas05200,oas05222	PI3K-Akt signaling pathway|Focal adhesion|ECM-receptor interaction|Relaxin signaling pathway|AGE-RAGE signaling pathway in diabetic complications|Protein digestion and absorption|Amoebiasis|Human papillomavirus infection|Pathways in cancer|Small cell lung cancer
COL7A1	58.2831	81.1944	35.3718	0.435197	-1.20026	0.000668982	0.00478314	Down	0.117289	0.140976	0.0672277	0.319286	0.223454	0.154898	GeneID:101119261	collagen type VII alpha 1 chain	GO:0000139,GO:0003429,GO:0004867,GO:0005576,GO:0005590,GO:0005604,GO:0005615,GO:0005788,GO:0006888,GO:0007155,GO:0008544,GO:0030020,GO:0030134,GO:0030198,GO:0031012,GO:0033116,GO:0035987,GO:0048208,GO:0062023	Golgi membrane|growth plate cartilage chondrocyte morphogenesis|serine-type endopeptidase inhibitor activity|extracellular region|collagen type VII trimer|basement membrane|extracellular space|endoplasmic reticulum lumen|ER to Golgi vesicle-mediated transport|cell adhesion|epidermis development|extracellular matrix structural constituent conferring tensile strength|COPII-coated ER to Golgi transp…	oas04974	Protein digestion and absorption
COL9A3	15.5056	26.0017	5.00948	0.193167	-2.37208	0.000105314	0.0010268	Down	0.0825569	0.0423792	0.0421763	0.249914	0.320222	0.236403	GeneID:101120183	collagen type IX alpha 3 chain	GO:0005201,GO:0005576,GO:0005594,GO:0005615,GO:0005788,GO:0008584,GO:0008585,GO:0030020,GO:0030198,GO:0031012	extracellular matrix structural constituent|extracellular region|collagen type IX trimer|extracellular space|endoplasmic reticulum lumen|male gonad development|female gonad development|extracellular matrix structural constituent conferring tensile strength|extracellular matrix organization|extracellular matrix	oas04151,oas04510,oas04512,oas04974,oas05165	PI3K-Akt signaling pathway|Focal adhesion|ECM-receptor interaction|Protein digestion and absorption|Human papillomavirus infection
COMP	10.0615	15.1069	5.01624	0.332567	-1.58829	0.0240261	0.0856128	Down	0.064754	0.0443205	0.0661625	0.215908	0.127027	0.146092	GeneID:101107864	cartilage oligomeric matrix protein	GO:0001968,GO:0002020,GO:0003417,GO:0005201,GO:0005499,GO:0005509,GO:0005518,GO:0005576,GO:0006915,GO:0007155,GO:0008201,GO:0043066,GO:0043395,GO:0060173	fibronectin binding|protease binding|growth plate cartilage development|extracellular matrix structural constituent|vitamin D binding|calcium ion binding|collagen binding|extracellular region|apoptotic process|cell adhesion|heparin binding|negative regulation of apoptotic process|heparan sulfate proteoglycan binding|limb development	oas04145,oas04151,oas04510,oas04512,oas05144,oas05165	Phagosome|PI3K-Akt signaling pathway|Focal adhesion|ECM-receptor interaction|Malaria|Human papillomavirus infection
CPEB1	104.729	47.4535	162.005	3.41585	1.77225	4.06835e-12	2.60229e-10	Up	1.44428	1.2101	1.69621	0.436992	0.479609	0.267937	GeneID:101110092	cytoplasmic polyadenylation element binding protein 1	GO:0000900,GO:0000932,GO:0003730,GO:0005634,GO:0005654,GO:0005737,GO:0005829,GO:0006397,GO:0008135,GO:0014069,GO:0030054,GO:0030425,GO:0032869,GO:0035925,GO:0043005,GO:0043022,GO:0045202,GO:0045211,GO:0046872,GO:0071230,GO:0071456,GO:1900365,GO:1990124,GO:2000766	translation repressor activity, mRNA regulatory element binding|P-body|mRNA 3'-UTR binding|nucleus|nucleoplasm|cytoplasm|cytosol|mRNA processing|translation factor activity, RNA binding|postsynaptic density|cell junction|dendrite|cellular response to insulin stimulus|mRNA 3'-UTR AU-rich region binding|neuron projection|ribosome binding|synapse|postsynaptic membrane|metal ion binding|cellular resp…	oas04114,oas04914	Oocyte meiosis|Progesterone-mediated oocyte maturation
CPNE5	6.45424	2.8123	10.0962	3.58915	1.84364	0.0468328	0.142286	Up	0.0918349	0.102141	0.0547357	0.00805799	0.0409436	0.0159377	GeneID:101102679	copine 5	GO:0005544,GO:0005886,GO:0043005,GO:0043204,GO:0070062,GO:0071277,GO:1903861	calcium-dependent phospholipid binding|plasma membrane|neuron projection|perikaryon|extracellular exosome|cellular response to calcium ion|positive regulation of dendrite extension
CPNE7	2.96815	5.6247	0.311598	0.0601319	-4.05573	0.0139157	0.0563058	Down	0	0	0.00922698	0.0855768	0.0386512	0.02821	GeneID:101110962	copine 7	GO:0005544,GO:0005634,GO:0005737,GO:0005886,GO:0071277	calcium-dependent phospholipid binding|nucleus|cytoplasm|plasma membrane|cellular response to calcium ion
CPNE9	24.3066	34.788	13.8252	0.397629	-1.33051	0.00335229	0.0178889	Down	0.111245	0.098983	0.121242	0.327972	0.238067	0.208506	GeneID:101104863	copine family member 9	GO:0005544,GO:0005615,GO:0005886,GO:0070062,GO:0071277,GO:1903861	calcium-dependent phospholipid binding|extracellular space|plasma membrane|extracellular exosome|cellular response to calcium ion|positive regulation of dendrite extension
CPZ	60.8135	85.3331	36.2939	0.424802	-1.23514	6.08786e-05	0.000644185	Down	0.513956	0.604879	0.345821	1.06912	0.912096	1.22698	GeneID:101120411	carboxypeptidase Z	GO:0004181,GO:0005615,GO:0006508,GO:0006518,GO:0008270,GO:0016055,GO:0016485	metallocarboxypeptidase activity|extracellular space|proteolysis|peptide metabolic process|zinc ion binding|Wnt signaling pathway|protein processing
CRABP1	1854.2	2674.68	1033.73	0.386425	-1.37174	4.21025e-33	3.33639e-30	Down	41.9635	44.0318	32.5206	94.5478	90.9067	100.019	GeneID:101122057	cellular retinoic acid binding protein 1	GO:0001972,GO:0005829,GO:0016918,GO:0019841,GO:0034653	retinoic acid binding|cytosol|retinal binding|retinol binding|retinoic acid catabolic process
CREB5	88.8732	121.535	56.2117	0.462754	-1.11168	3.09549e-05	0.000360604	Down	0.277423	0.262912	0.430638	0.763974	0.5309	0.64997	GeneID:101112976	cAMP responsive element binding protein 5	GO:0001077,GO:0003677,GO:0003700,GO:0005634,GO:0045444,GO:0045893,GO:0045944,GO:0060612	proximal promoter DNA-binding transcription activator activity, RNA polymerase II-specific|DNA binding|DNA-binding transcription factor activity|nucleus|fat cell differentiation|positive regulation of transcription, DNA-templated|positive regulation of transcription by RNA polymerase II|adipose tissue development	oas04022,oas04024,oas04151,oas04152,oas04211,oas04261,oas04668,oas04714,oas04725,oas04728,oas04911,oas04915,oas04918,oas04922,oas04925,oas04926,oas04927,oas04928,oas04931,oas04934,oas04962,oas05016,oas05030,oas05031,oas05034,oas05161,oas05163,oas05165,oas05166,oas05203,oas05215	cGMP-PKG signaling pathway|cAMP signaling pathway|PI3K-Akt signaling pathway|AMPK signaling pathway|Longevity regulating pathway|Adrenergic signaling in cardiomyocytes|TNF signaling pathway|Thermogenesis|Cholinergic synapse|Dopaminergic synapse|Insulin secretion|Estrogen signaling pathway|Thyroid hormone synthesis|Glucagon signaling pathway|Aldosterone synthesis and secretion|Relaxin signaling pa…
CRISPLD2	17332.3	11538.2	23126.5	2.00432	1.00312	4.51259e-22	1.31362e-19	Up	158.153	173.021	157.585	67.2221	70.4642	89.031	GeneID:101102507	cysteine rich secretory protein LCCL domain containing 2	GO:0005539,GO:0005615,GO:0008201,GO:0030133,GO:0030198,GO:0031012,GO:0060325	glycosaminoglycan binding|extracellular space|heparin binding|transport vesicle|extracellular matrix organization|extracellular matrix|face morphogenesis
CSF1R	9.33291	16.1704	2.49538	0.155076	-2.68895	0.00149321	0.00925937	Down	0.0206797	0.00707703	0.0281727	0.181452	0.0885101	0.0645999	GeneID:101109969	colony stimulating factor 1 receptor	GO:0004714,GO:0004888,GO:0005011,GO:0005524,GO:0005737,GO:0005887,GO:0006954,GO:0007169,GO:0008284,GO:0008360,GO:0009968,GO:0009986,GO:0018108,GO:0019955,GO:0030154,GO:0030316,GO:0030335,GO:0031529,GO:0036006,GO:0042531,GO:0043066,GO:0043235,GO:0045087,GO:0045124,GO:0046488,GO:0046777,GO:0048015,GO:0070374,GO:0071345,GO:0071902,GO:1990682,GO:2000249	transmembrane receptor protein tyrosine kinase activity|transmembrane signaling receptor activity|macrophage colony-stimulating factor receptor activity|ATP binding|cytoplasm|integral component of plasma membrane|inflammatory response|transmembrane receptor protein tyrosine kinase signaling pathway|positive regulation of cell proliferation|regulation of cell shape|negative regulation of signal tr…	oas04010,oas04014,oas04015,oas04060,oas04151,oas04380,oas04640,oas05200,oas05202,oas05221	MAPK signaling pathway|Ras signaling pathway|Rap1 signaling pathway|Cytokine-cytokine receptor interaction|PI3K-Akt signaling pathway|Osteoclast differentiation|Hematopoietic cell lineage|Pathways in cancer|Transcriptional misregulation in cancer|Acute myeloid leukemia
CSF3	2.27101	4.21768	0.324336	0.0801897	-3.64044	0.0361957	0.117661	Down	0	0.0122694	0	0.0503332	0.0639374	0.0373322	GeneID:443523	colony stimulating factor 3	GO:0005125,GO:0005130,GO:0005615,GO:0006955,GO:0008083,GO:0008284,GO:0014068,GO:0019899,GO:0030838,GO:0032092,GO:0033138,GO:0045639,GO:0045944,GO:0050731,GO:0051091,GO:0051897,GO:0071345,GO:2000251	cytokine activity|granulocyte colony-stimulating factor receptor binding|extracellular space|immune response|growth factor activity|positive regulation of cell proliferation|positive regulation of phosphatidylinositol 3-kinase signaling|enzyme binding|positive regulation of actin filament polymerization|positive regulation of protein binding|positive regulation of peptidyl-serine phosphorylation|…	oas04060,oas04151,oas04630,oas04640,oas04657,oas05144	Cytokine-cytokine receptor interaction|PI3K-Akt signaling pathway|Jak-STAT signaling pathway|Hematopoietic cell lineage|IL-17 signaling pathway|Malaria
CXCL1	718.9	446.436	991.364	2.22041	1.15083	8.33185e-05	0.000839898	Up	73.2285	113.173	62.5373	37.1549	31.5761	35.8495	GeneID:443380	chemokine (C-X-C motif) ligand 1 (melanoma growth stimulating activity, alpha)	GO:0005615,GO:0006954,GO:0006955,GO:0008009,GO:0008083	extracellular space|inflammatory response|immune response|chemokine activity|growth factor activity	oas04060,oas04062,oas04621,oas04657,oas04668,oas05132,oas05134,oas05167	Cytokine-cytokine receptor interaction|Chemokine signaling pathway|NOD-like receptor signaling pathway|IL-17 signaling pathway|TNF signaling pathway|Salmonella infection|Legionellosis|Kaposi sarcoma-associated herpesvirus infection
CXCL8	2129.17	1281.4	2976.94	2.32316	1.21609	0.00174882	0.0105566	Up	41.1372	82.1805	45.9353	23.892	27.0047	17.2373	GeneID:443418	C-X-C motif chemokine ligand 8	GO:0005153,GO:0005615,GO:0006954,GO:0006955,GO:0007050,GO:0008009,GO:0030155,GO:0030593,GO:0042119,GO:0045091,GO:0050930	interleukin-8 receptor binding|extracellular space|inflammatory response|immune response|cell cycle arrest|chemokine activity|regulation of cell adhesion|neutrophil chemotaxis|neutrophil activation|regulation of single stranded viral RNA replication via double stranded DNA intermediate|induction of positive chemotaxis	oas04060,oas04062,oas04064,oas04072,oas04218,oas04620,oas04621,oas04622,oas04657,oas04932,oas04933,oas05132,oas05133,oas05134,oas05142,oas05144,oas05146,oas05161,oas05163,oas05164,oas05167,oas05200,oas05202,oas05219,oas05323	Cytokine-cytokine receptor interaction|Chemokine signaling pathway|NF-kappa B signaling pathway|Phospholipase D signaling pathway|Cellular senescence|Toll-like receptor signaling pathway|NOD-like receptor signaling pathway|RIG-I-like receptor signaling pathway|IL-17 signaling pathway|Non-alcoholic fatty liver disease (NAFLD)|AGE-RAGE signaling pathway in diabetic complications|Salmonella infectio…
CYP1A1	290.282	169.293	411.271	2.42938	1.28059	1.09687e-14	1.08651e-12	Up	3.96571	4.11322	5.44419	1.50965	1.80615	1.85294	GeneID:100170113	cytochrome P4501A1	GO:0005506,GO:0005789,GO:0020037,GO:0031090,GO:0070330	iron ion binding|endoplasmic reticulum membrane|heme binding|organelle membrane|aromatase activity	oas00140,oas00380,oas00830,oas00980,oas04913,oas05204	Steroid hormone biosynthesis|Tryptophan metabolism|Retinol metabolism|Metabolism of xenobiotics by cytochrome P450|Ovarian steroidogenesis|Chemical carcinogenesis
DDAH1	1665.18	2363.49	966.871	0.409132	-1.28936	2.46176e-46	5.01635e-43	Down	7.55094	6.68494	7.12816	16.2541	15.3249	16.936	GeneID:101113635	dimethylarginine dimethylaminohydrolase 1	GO:0000052,GO:0003073,GO:0006525,GO:0006527,GO:0006809,GO:0008270,GO:0008285,GO:0016403,GO:0016597,GO:0017014,GO:0043116,GO:0045429,GO:1900038	citrulline metabolic process|regulation of systemic arterial blood pressure|arginine metabolic process|arginine catabolic process|nitric oxide biosynthetic process|zinc ion binding|negative regulation of cell proliferation|dimethylargininase activity|amino acid binding|protein nitrosylation|negative regulation of vascular permeability|positive regulation of nitric oxide biosynthetic process|negat…
DDIAS	79.7169	52.6665	106.767	2.02752	1.01971	0.000381438	0.00301516	Up	0.696358	0.638576	1.00163	0.391524	0.24596	0.42943	GeneID:101114477	DNA damage induced apoptosis suppressor	GO:0005634,GO:0005737,GO:0006915,GO:0007050,GO:0097752,GO:1902230	nucleus|cytoplasm|apoptotic process|cell cycle arrest|regulation of DNA stability|negative regulation of intrinsic apoptotic signaling pathway in response to DNA damage
DDIT4	2583.99	3536.81	1631.17	0.461207	-1.11651	3.12068e-20	6.79328e-18	Down	27.4161	26.0346	26.2501	62.7051	56.7285	41.3408	GeneID:101114584	DNA damage inducible transcript 4	GO:0001666,GO:0001764,GO:0005737,GO:0005739,GO:0005829,GO:0007420,GO:0008283,GO:0010801,GO:0030182,GO:0032007,GO:0032984,GO:0033137,GO:0042771,GO:0045820,GO:0048011,GO:0051607,GO:0071549,GO:0071889,GO:0072593,GO:1901216,GO:1902532	response to hypoxia|neuron migration|cytoplasm|mitochondrion|cytosol|brain development|cell proliferation|negative regulation of peptidyl-threonine phosphorylation|neuron differentiation|negative regulation of TOR signaling|protein-containing complex disassembly|negative regulation of peptidyl-serine phosphorylation|intrinsic apoptotic signaling pathway in response to DNA damage by p53 class medi…	oas04140,oas04150,oas04151,oas05206	Autophagy - animal|mTOR signaling pathway|PI3K-Akt signaling pathway|MicroRNAs in cancer
DHRS3	178.823	318.122	39.5239	0.124271	-3.00844	3.34003e-07	6.97672e-06	Down	0.649877	0.414128	0.366352	2.15901	2.23	6.27701	GeneID:101109288	dehydrogenase/reductase 3	GO:0000166,GO:0001523,GO:0003151,GO:0004745,GO:0005789,GO:0005811,GO:0007601,GO:0009055,GO:0016021,GO:0030278,GO:0042572,GO:0042622,GO:0048387,GO:0052650,GO:0060021,GO:0060349,GO:0060411	nucleotide binding|retinoid metabolic process|outflow tract morphogenesis|retinol dehydrogenase activity|endoplasmic reticulum membrane|lipid droplet|visual perception|electron transfer activity|integral component of membrane|regulation of ossification|retinol metabolic process|photoreceptor outer segment membrane|negative regulation of retinoic acid receptor signaling pathway|NADP-retinol dehydr…	oas00830	Retinol metabolism
DIO3	405.153	601.978	208.328	0.345931	-1.53144	4.83689e-22	1.37987e-19	Down	5.89536	7.60616	7.69861	20.8463	20.9821	15.1991	GeneID:100142657	iodothyronine deiodinase 3	GO:0004800,GO:0005886,GO:0010008,GO:0016021,GO:0042446	thyroxine 5'-deiodinase activity|plasma membrane|endosome membrane|integral component of membrane|hormone biosynthetic process	oas04919	Thyroid hormone signaling pathway
DLEC1	9.74047	14.4002	5.08071	0.351401	-1.50881	0.0386535	0.123351	Down	0.00854371	0.0350861	0.0261887	0.0539756	0.0639933	0.0667229	GeneID:101115235	DLEC1 cilia and flagella associated protein	GO:0005737,GO:0005829,GO:0008285	cytoplasm|cytosol|negative regulation of cell proliferation
DLX2	6.35608	1.406	11.3062	8.04665	3.00839	0.00510302	0.025191	Up	0.473425	0.306979	0.127296	0.026236	0.0533234	0.0259457	GeneID:101106667	distal-less homeobox 2	GO:0000122,GO:0000977,GO:0001228,GO:0003677,GO:0003682,GO:0003727,GO:0005634,GO:0006357,GO:0009954,GO:0021544,GO:0021766,GO:0021772,GO:0021879,GO:0021882,GO:0021892,GO:0021893,GO:0030154,GO:0042475,GO:0045597,GO:0045746,GO:0045944,GO:0046533,GO:0048701,GO:0048706,GO:0048715,GO:0048755,GO:0051216,GO:1902871	negative regulation of transcription by RNA polymerase II|RNA polymerase II regulatory region sequence-specific DNA binding|DNA-binding transcription activator activity, RNA polymerase II-specific|DNA binding|chromatin binding|single-stranded RNA binding|nucleus|regulation of transcription by RNA polymerase II|proximal/distal pattern formation|subpallium development|hippocampus development|olfact…
DNAJC22	29.6222	17.2006	42.0437	2.44491	1.28978	0.00215988	0.0125595	Up	0.560715	0.41448	0.549995	0.177118	0.143994	0.256899	GeneID:101101970	DnaJ heat shock protein family (Hsp40) member C22	GO:0016021	integral component of membrane
DNM1	509.295	734.686	283.904	0.386473	-1.37156	1.19805e-13	9.87806e-12	Down	1.91588	1.84695	2.19645	5.91512	5.37176	3.0567	GeneID:101108737	dynamin 1	GO:0001917,GO:0002031,GO:0003723,GO:0003924,GO:0005525,GO:0005634,GO:0005654,GO:0005737,GO:0005794,GO:0005874,GO:0005886,GO:0006897,GO:0006898,GO:0007032,GO:0008017,GO:0008021,GO:0008022,GO:0014069,GO:0016020,GO:0016185,GO:0017124,GO:0019901,GO:0030117,GO:0030424,GO:0031410,GO:0031623,GO:0031749,GO:0042802,GO:0043196,GO:0043197,GO:0043209,GO:0044327,GO:0044877,GO:0045202,GO:0045211,GO:0048013,GO:…	photoreceptor inner segment|G protein-coupled receptor internalization|RNA binding|GTPase activity|GTP binding|nucleus|nucleoplasm|cytoplasm|Golgi apparatus|microtubule|plasma membrane|endocytosis|receptor-mediated endocytosis|endosome organization|microtubule binding|synaptic vesicle|protein C-terminus binding|postsynaptic density|membrane|synaptic vesicle budding from presynaptic endocytic zone…	oas04072,oas04144,oas04721,oas04961,oas05100	Phospholipase D signaling pathway|Endocytosis|Synaptic vesicle cycle|Endocrine and other factor-regulated calcium reabsorption|Bacterial invasion of epithelial cells
DOC2A	1.59282	0	3.18565	16.4028	4.03587	0.0425902	0.132499	Up	0.0204236	0.0629045	0.0208678	0	0	0	GeneID:101116792	double C2 domain alpha	GO:0005509,GO:0005544,GO:0005730,GO:0005764,GO:0016079,GO:0017158,GO:0030054,GO:0043005,GO:0098850	calcium ion binding|calcium-dependent phospholipid binding|nucleolus|lysosome|synaptic vesicle exocytosis|regulation of calcium ion-dependent exocytosis|cell junction|neuron projection|extrinsic component of synaptic vesicle membrane
DOCK2	54.9442	91.1304	18.7581	0.20567	-2.2816	0.0135682	0.055248	Down	0.0425463	0.139779	0.0739021	0.54654	0.550855	0.0708843	GeneID:101104011	dedicator of cytokinesis 2	GO:0001766,GO:0001768,GO:0001771,GO:0002277,GO:0005096,GO:0005576,GO:0005829,GO:0005856,GO:0006935,GO:0007264,GO:0016020,GO:0030036,GO:0030676,GO:0035580,GO:0042608,GO:0043312,GO:0044351,GO:0045059,GO:0045060,GO:0046633,GO:0050690,GO:0050766,GO:0070062	membrane raft polarization|establishment of T cell polarity|immunological synapse formation|myeloid dendritic cell activation involved in immune response|GTPase activator activity|extracellular region|cytosol|cytoskeleton|chemotaxis|small GTPase mediated signal transduction|membrane|actin cytoskeleton organization|Rac guanyl-nucleotide exchange factor activity|specific granule lumen|T cell recept…	oas04062,oas04666	Chemokine signaling pathway|Fc gamma R-mediated phagocytosis
DOK3	4.68611	8.091	1.28123	0.156849	-2.67255	0.0286161	0.0983534	Down	0.00980938	0.0302129	0	0.123943	0.0944657	0.0204286	GeneID:101107279	docking protein 3	GO:0005886,GO:0007265,GO:0030667,GO:0043312,GO:0101003	plasma membrane|Ras protein signal transduction|secretory granule membrane|neutrophil degranulation|ficolin-1-rich granule membrane
DOK4	142.388	200.903	83.8734	0.41715	-1.26136	2.47982e-09	8.95497e-08	Down	1.02605	1.16791	0.82046	1.90237	2.39864	2.42713	GeneID:101102081	docking protein 4	GO:0005829,GO:0007411	cytosol|axon guidance
DQX1	107.724	148.306	67.1411	0.452481	-1.14407	6.15933e-06	8.88339e-05	Down	0.662749	0.688822	0.418004	1.29228	1.40955	0.945703	GeneID:101119457	DEAQ-box RNA dependent ATPase 1	GO:0003723,GO:0005524,GO:0005634,GO:0034459	RNA binding|ATP binding|nucleus|ATP-dependent 3'-5' RNA helicase activity
DTX4	21.7866	34.7481	8.82509	0.253714	-1.97872	0.000194962	0.00173961	Down	0.0701089	0.089973	0.0895424	0.166095	0.309447	0.438018	GeneID:101110361	deltex E3 ubiquitin ligase 4	GO:0004842,GO:0005829,GO:0007219,GO:0008270,GO:0032479	ubiquitin-protein transferase activity|cytosol|Notch signaling pathway|zinc ion binding|regulation of type I interferon production	oas04330	Notch signaling pathway
EDIL3	671.538	266.482	1076.59	4.04001	2.01436	4.59644e-36	5.04336e-33	Up	5.97006	5.10408	7.42953	1.37578	1.10825	1.75876	GeneID:101118698	EGF like repeats and discoidin domains 3	GO:0005178,GO:0005201,GO:0005509,GO:0007155,GO:0007275,GO:0010811,GO:0062023,GO:0070062,GO:1903561	integrin binding|extracellular matrix structural constituent|calcium ion binding|cell adhesion|multicellular organism development|positive regulation of cell-substrate adhesion|collagen-containing extracellular matrix|extracellular exosome|extracellular vesicle
EEF1A2	1077.46	518.562	1636.36	3.15557	1.6579	7.80518e-58	2.78333e-54	Up	25.7457	25.4517	24.1063	8.18058	7.24554	6.76893	GeneID:101109898	eukaryotic translation elongation factor 1 alpha 2	GO:0003746,GO:0003924,GO:0005525,GO:0005634,GO:0005853,GO:0006412,GO:0006414,GO:0019901,GO:0043065,GO:0043209,GO:0045202,GO:0090218	translation elongation factor activity|GTPase activity|GTP binding|nucleus|eukaryotic translation elongation factor 1 complex|translation|translational elongation|protein kinase binding|positive regulation of apoptotic process|myelin sheath|synapse|positive regulation of lipid kinase activity	oas03013,oas05134	RNA transport|Legionellosis
EFCAB13	18.4155	24.5985	12.2324	0.497875	-1.00614	0.0492796	0.147611	Down	0.15316	0.112317	0.167669	0.230381	0.351178	0.227832	GeneID:101121788	EF-hand calcium binding domain 13
EFNB3	210.698	283.472	137.924	0.486389	-1.03982	1.08425e-09	4.26053e-08	Down	1.44147	1.46106	1.18202	2.3685	2.78025	2.66734	GeneID:101103994	ephrin B3	GO:0001618,GO:0004713,GO:0005005,GO:0005886,GO:0005887,GO:0007267,GO:0007399,GO:0007411,GO:0007628,GO:0016198,GO:0031295,GO:0046875,GO:0048013,GO:0050771,GO:0098686,GO:0098978,GO:0099056,GO:0099061,GO:0099557	virus receptor activity|protein tyrosine kinase activity|transmembrane-ephrin receptor activity|plasma membrane|integral component of plasma membrane|cell-cell signaling|nervous system development|axon guidance|adult walking behavior|axon choice point recognition|T cell costimulation|ephrin receptor binding|ephrin receptor signaling pathway|negative regulation of axonogenesis|hippocampal mossy fi…	oas04360	Axon guidance
EFR3B	5.77071	2.45985	9.08158	3.69615	1.88602	0.047331	0.14334	Up	0.11915	0.0658688	0.0842831	0.0193011	0.0294214	0.0190875	GeneID:101108899	EFR3 homolog B	GO:0005829,GO:0005886,GO:0046854,GO:0072659	cytosol|plasma membrane|phosphatidylinositol phosphorylation|protein localization to plasma membrane
EGLN3	402.817	608.178	197.456	0.324647	-1.62306	0.00928831	0.0408529	Down	1.72112	2.61518	1.91934	8.22231	7.85058	1.93554	GeneID:101117367	egl-9 family hypoxia inducible factor 3	GO:0001666,GO:0005506,GO:0005634,GO:0005654,GO:0005737,GO:0005829,GO:0006915,GO:0006919,GO:0006974,GO:0016706,GO:0018126,GO:0018401,GO:0031418,GO:0031545,GO:0042127,GO:0043523,GO:0061418	response to hypoxia|iron ion binding|nucleus|nucleoplasm|cytoplasm|cytosol|apoptotic process|activation of cysteine-type endopeptidase activity involved in apoptotic process|cellular response to DNA damage stimulus|oxidoreductase activity, acting on paired donors, with incorporation or reduction of molecular oxygen, 2-oxoglutarate as one donor, and incorporation of one atom each of oxygen into bo…	oas04066,oas05200,oas05211	HIF-1 signaling pathway|Pathways in cancer|Renal cell carcinoma
EGR4	44.0651	29.1332	58.997	2.02353	1.01687	0.00750321	0.0345128	Up	0.844296	0.927853	0.486007	0.26294	0.292654	0.482913	GeneID:101113051	early growth response 4	GO:0000977,GO:0000981,GO:0005634,GO:0006357,GO:0045944,GO:0046872,GO:0071363	RNA polymerase II regulatory region sequence-specific DNA binding|DNA-binding transcription factor activity, RNA polymerase II-specific|nucleus|regulation of transcription by RNA polymerase II|positive regulation of transcription by RNA polymerase II|metal ion binding|cellular response to growth factor stimulus
EID3	17.2387	25.9901	8.48723	0.326644	-1.61421	0.00291736	0.0159925	Down	0.202719	0.156093	0.103564	0.426898	0.415748	0.474946	GeneID:101113401	EP300 interacting inhibitor of differentiation 3	GO:0000781,GO:0005634,GO:0005737,GO:0006281,GO:0006310,GO:0030915,GO:2001022	chromosome, telomeric region|nucleus|cytoplasm|DNA repair|DNA recombination|Smc5-Smc6 complex|positive regulation of response to DNA damage stimulus
ELN	30.4361	52.6856	8.18656	0.155301	-2.68686	1.12534e-08	3.41527e-07	Down	0.0389537	0.0639879	0.103483	0.483984	0.325112	0.421842	GeneID:101111152	elastin	GO:0005201,GO:0062023,GO:0071953	extracellular matrix structural constituent|collagen-containing extracellular matrix|elastic fiber	oas04974	Protein digestion and absorption
EMID1	5.22137	9.48246	0.96027	0.100065	-3.321	0.00507616	0.0250888	Down	0	0.0203309	0.0101168	0.0938295	0.0847572	0.103101	GeneID:101120697	EMI domain containing 1	GO:0005581,GO:0005783,GO:0005794,GO:0010811,GO:0031012	collagen trimer|endoplasmic reticulum|Golgi apparatus|positive regulation of cell-substrate adhesion|extracellular matrix
EMILIN2	739.524	356.305	1122.74	3.15148	1.65603	1.59267e-37	2.27179e-34	Up	6.79833	6.4928	8.22402	2.38398	2.188	1.77128	GeneID:101123002	elastin microfibril interfacer 2	GO:0005576,GO:0005581,GO:0007155,GO:0010811,GO:0030023,GO:0031012,GO:0062023	extracellular region|collagen trimer|cell adhesion|positive regulation of cell-substrate adhesion|extracellular matrix constituent conferring elasticity|extracellular matrix|collagen-containing extracellular matrix
EMP2	775.797	1093.18	458.414	0.419202	-1.25428	5.84791e-16	6.62641e-14	Down	2.33113	2.73316	1.72413	5.58196	5.33306	4.18443	GeneID:101107656	epithelial membrane protein 2	GO:0000139,GO:0001765,GO:0001913,GO:0001952,GO:0003093,GO:0005634,GO:0005737,GO:0005794,GO:0005829,GO:0005886,GO:0007015,GO:0007155,GO:0007160,GO:0007566,GO:0008219,GO:0008284,GO:0009986,GO:0010594,GO:0016021,GO:0016324,GO:0016477,GO:0019901,GO:0032060,GO:0032147,GO:0034394,GO:0043534,GO:0043549,GO:0045022,GO:0045121,GO:0045177,GO:0045765,GO:0070252,GO:0072659,GO:2001046,GO:2001212	Golgi membrane|membrane raft assembly|T cell mediated cytotoxicity|regulation of cell-matrix adhesion|regulation of glomerular filtration|nucleus|cytoplasm|Golgi apparatus|cytosol|plasma membrane|actin filament organization|cell adhesion|cell-matrix adhesion|embryo implantation|cell death|positive regulation of cell proliferation|cell surface|regulation of endothelial cell migration|integral comp…
ENPP2	143.685	193.873	93.4966	0.482113	-1.05256	5.85666e-08	1.49444e-06	Down	0.60922	0.638101	0.609897	1.06911	1.21157	1.30078	GeneID:101120171	ectonucleotide pyrophosphatase/phosphodiesterase 2	GO:0001953,GO:0003676,GO:0004528,GO:0004551,GO:0004622,GO:0005044,GO:0005509,GO:0005615,GO:0005737,GO:0005794,GO:0006955,GO:0008270,GO:0008284,GO:0009395,GO:0010634,GO:0021536,GO:0030247,GO:0030334,GO:0030900,GO:0030901,GO:0034638,GO:0044849,GO:0045765,GO:0047391,GO:0048714,GO:0050731,GO:0051894,GO:0060326,GO:0071276,GO:0071392,GO:1900026,GO:1903165,GO:2000394	negative regulation of cell-matrix adhesion|nucleic acid binding|phosphodiesterase I activity|nucleotide diphosphatase activity|lysophospholipase activity|scavenger receptor activity|calcium ion binding|extracellular space|cytoplasm|Golgi apparatus|immune response|zinc ion binding|positive regulation of cell proliferation|phospholipid catabolic process|positive regulation of epithelial cell migra…	oas00565	Ether lipid metabolism
EPHA7	50.3283	20.3448	80.3117	3.94458	1.97987	3.73255e-07	7.68269e-06	Up	0.311139	0.312639	0.233357	0.0557631	0.0318756	0.113739	GeneID:101107288	EPH receptor A7			oas04360	Axon guidance
EPSTI1	58.3513	27.0341	89.6684	3.3178	1.73023	5.28634e-07	1.04438e-05	Up	1.88721	1.26286	1.73888	0.230646	0.540895	0.596553	GeneID:101123642	epithelial stromal interaction 1
ERCC6L	12.9573	7.37986	18.5348	2.51261	1.32919	0.0436396	0.134881	Up	0.0765402	0.0982265	0.208547	0.0335798	0.0682493	0.0398499	GeneID:101108989	ERCC excision repair 6 like, spindle assembly checkpoint helicase	GO:0000777,GO:0003677,GO:0004386,GO:0005524,GO:0007049,GO:0015616,GO:0051301	condensed chromosome kinetochore|DNA binding|helicase activity|ATP binding|cell cycle|DNA translocase activity|cell division
ESM1	38.1137	21.4107	54.8167	2.55875	1.35544	0.000564187	0.00415466	Up	1.22673	1.54218	1.66269	0.579931	0.29467	0.729926	GeneID:101117876	endothelial cell specific molecule 1	GO:0001525,GO:0001558,GO:0002040,GO:0005171,GO:0005178,GO:0005520,GO:0005576,GO:0008284,GO:1902204	angiogenesis|regulation of cell growth|sprouting angiogenesis|hepatocyte growth factor receptor binding|integrin binding|insulin-like growth factor binding|extracellular region|positive regulation of cell proliferation|positive regulation of hepatocyte growth factor receptor signaling pathway
EVPL	6.7949	12.3052	1.28461	0.103053	-3.27855	0.00253567	0.0143535	Down	0	0.0125305	0.00415683	0.0856736	0.0391786	0.0254177	GeneID:101118371	envoplakin	GO:0001533,GO:0005198,GO:0005737,GO:0005829,GO:0008544,GO:0016020,GO:0018149,GO:0019215,GO:0030057,GO:0030216,GO:0030674,GO:0042060,GO:0045104,GO:0045111,GO:0045296,GO:0070062,GO:0070268	cornified envelope|structural molecule activity|cytoplasm|cytosol|epidermis development|membrane|peptide cross-linking|intermediate filament binding|desmosome|keratinocyte differentiation|protein binding, bridging|wound healing|intermediate filament cytoskeleton organization|intermediate filament cytoskeleton|cadherin binding|extracellular exosome|cornification
F2R	14.4166	20.728	8.10519	0.392412	-1.34956	0.0269648	0.09388	Down	0.104445	0.0306371	0.060981	0.196381	0.127723	0.13983	GeneID:101105757	coagulation factor II thrombin receptor	GO:0000186,GO:0001965,GO:0002248,GO:0003105,GO:0004930,GO:0005886,GO:0005887,GO:0005901,GO:0006919,GO:0006954,GO:0007186,GO:0007204,GO:0007205,GO:0007529,GO:0008284,GO:0008285,GO:0009611,GO:0014068,GO:0015057,GO:0030168,GO:0030194,GO:0030335,GO:0031094,GO:0031594,GO:0031681,GO:0032496,GO:0032651,GO:0032967,GO:0035025,GO:0043123,GO:0043280,GO:0043410,GO:0043524,GO:0045211,GO:0045893,GO:0045907,GO:…	activation of MAPKK activity|G-protein alpha-subunit binding|connective tissue replacement involved in inflammatory response wound healing|negative regulation of glomerular filtration|G protein-coupled receptor activity|plasma membrane|integral component of plasma membrane|caveola|activation of cysteine-type endopeptidase activity involved in apoptotic process|inflammatory response|G protein-coup…	oas04015,oas04020,oas04024,oas04072,oas04080,oas04151,oas04610,oas04611,oas04810,oas05200	Rap1 signaling pathway|Calcium signaling pathway|cAMP signaling pathway|Phospholipase D signaling pathway|Neuroactive ligand-receptor interaction|PI3K-Akt signaling pathway|Complement and coagulation cascades|Platelet activation|Regulation of actin cytoskeleton|Pathways in cancer
FABP4	86.9715	25.3097	148.633	5.87572	2.55476	6.72014e-19	1.18341e-16	Up	9.98615	9.36978	12.4332	1.88012	2.05215	1.10181	GeneID:100137067	fatty acid binding protein 4, adipocyte	GO:0005324,GO:0005634,GO:0005737,GO:0015909,GO:0036041,GO:0050727	long-chain fatty acid transporter activity|nucleus|cytoplasm|long-chain fatty acid transport|long-chain fatty acid binding|regulation of inflammatory response	oas03320,oas04923	PPAR signaling pathway|Regulation of lipolysis in adipocytes
FAIM2	8.45733	2.80749	14.1072	5.02533	2.32922	0.00510276	0.025191	Up	0.116551	0.0717956	0.0774064	0.0122721	0.0124712	0.0242725	GeneID:101121759	Fas apoptotic inhibitory molecule 2	GO:0002931,GO:0005783,GO:0005794,GO:0006915,GO:0016021,GO:0021549,GO:0021680,GO:0021681,GO:0021702,GO:0030054,GO:0043523,GO:0043524,GO:0045121,GO:0045211,GO:1902042	response to ischemia|endoplasmic reticulum|Golgi apparatus|apoptotic process|integral component of membrane|cerebellum development|cerebellar Purkinje cell layer development|cerebellar granular layer development|cerebellar Purkinje cell differentiation|cell junction|regulation of neuron apoptotic process|negative regulation of neuron apoptotic process|membrane raft|postsynaptic membrane|negative …
FAM167A	67.5848	105.802	29.3672	0.277189	-1.85106	8.79289e-09	2.75652e-07	Down	0.182729	0.22864	0.128359	0.703467	0.702661	0.410275	GeneID:101118417	family with sequence similarity 167 member A
FAM71E2	286.909	525.942	47.875	0.0910214	-3.45765	7.30673e-07	1.38227e-05	Down	0.525723	0.560501	0.475179	7.34518	7.30209	1.36856	GeneID:101120774	family with sequence similarity 71 member E2
FAM83C	24.4316	42.2032	6.66002	0.157222	-2.66912	4.33901e-06	6.54938e-05	Down	0.0521193	0.0840857	0.0228227	0.329268	0.478015	0.139553	GeneID:101119841	family with sequence similarity 83 member C	GO:0019901	protein kinase binding
FBLN1	14925	20646.2	9203.77	0.445777	-1.1656	3.36864e-24	1.14405e-21	Down	77.4809	86.7653	69.9589	179.557	178.553	131.417	GeneID:100037704	fibulin 1	GO:0005509,GO:0005576,GO:0016504,GO:0030198	calcium ion binding|extracellular region|peptidase activator activity|extracellular matrix organization
FBN2	200.847	275.14	126.554	0.459884	-1.12066	5.25e-10	2.20253e-08	Down	0.288637	0.331196	0.371742	0.687001	0.755245	0.563219	GeneID:101104991	fibrillin 2	GO:0001527,GO:0005201,GO:0005509,GO:0005576,GO:0030023,GO:0030198,GO:0030326,GO:0030501,GO:0031012,GO:0035583,GO:0043010,GO:0045669,GO:0048048,GO:0060346,GO:0062023	microfibril|extracellular matrix structural constituent|calcium ion binding|extracellular region|extracellular matrix constituent conferring elasticity|extracellular matrix organization|embryonic limb morphogenesis|positive regulation of bone mineralization|extracellular matrix|sequestering of TGFbeta in extracellular matrix|camera-type eye development|positive regulation of osteoblast differenti…
FGD4	145.262	88.4985	202.026	2.28309	1.19099	2.54755e-09	9.17633e-08	Up	0.650677	0.584136	0.742137	0.251741	0.249349	0.302528	GeneID:101105233	FYVE, RhoGEF and PH domain containing 4	GO:0001726,GO:0003779,GO:0005085,GO:0005089,GO:0005737,GO:0005794,GO:0005829,GO:0005856,GO:0007010,GO:0007186,GO:0008360,GO:0030027,GO:0030036,GO:0030175,GO:0031267,GO:0035023,GO:0043065,GO:0043087,GO:0046847,GO:0046872,GO:0051056	ruffle|actin binding|guanyl-nucleotide exchange factor activity|Rho guanyl-nucleotide exchange factor activity|cytoplasm|Golgi apparatus|cytosol|cytoskeleton|cytoskeleton organization|G protein-coupled receptor signaling pathway|regulation of cell shape|lamellipodium|actin cytoskeleton organization|filopodium|small GTPase binding|regulation of Rho protein signal transduction|positive regulation o…
FGF21	21.9588	35.4788	8.43888	0.23857	-2.06751	8.27537e-05	0.000836698	Down	0.411443	0.168966	0.168157	1.21302	0.763101	0.942541	GeneID:101108510	fibroblast growth factor 21			oas04010,oas04014,oas04015,oas04151,oas04714,oas04810,oas05200,oas05218,oas05224,oas05226	MAPK signaling pathway|Ras signaling pathway|Rap1 signaling pathway|PI3K-Akt signaling pathway|Thermogenesis|Regulation of actin cytoskeleton|Pathways in cancer|Melanoma|Breast cancer|Gastric cancer
FGF23	2.28798	4.57596	0	0.0379534	-4.71963	0.0146407	0.058399	Down	0	0	0	0.0499412	0.0592101	0	GeneID:101112475	fibroblast growth factor 23			oas04010,oas04014,oas04015,oas04151,oas04810,oas04928,oas05200,oas05218,oas05224,oas05226	MAPK signaling pathway|Ras signaling pathway|Rap1 signaling pathway|PI3K-Akt signaling pathway|Regulation of actin cytoskeleton|Parathyroid hormone synthesis, secretion and action|Pathways in cancer|Melanoma|Breast cancer|Gastric cancer
FGF5	46.7601	63.1806	30.3396	0.480854	-1.05633	0.00777796	0.0353553	Down	0.744801	0.343318	0.403797	0.56016	0.959591	1.36116	GeneID:100642180	fibroblast growth factor 5	GO:0005104,GO:0005576,GO:0008083,GO:0008284,GO:0008543,GO:0010001,GO:0023019,GO:0051781	fibroblast growth factor receptor binding|extracellular region|growth factor activity|positive regulation of cell proliferation|fibroblast growth factor receptor signaling pathway|glial cell differentiation|signal transduction involved in regulation of gene expression|positive regulation of cell division	oas04010,oas04014,oas04015,oas04151,oas04810,oas05200,oas05218,oas05224,oas05226	MAPK signaling pathway|Ras signaling pathway|Rap1 signaling pathway|PI3K-Akt signaling pathway|Regulation of actin cytoskeleton|Pathways in cancer|Melanoma|Breast cancer|Gastric cancer
FJX1	711.489	995.285	427.693	0.429785	-1.21831	4.49176e-21	1.10466e-18	Down	6.18846	5.03083	4.66591	10.9731	10.6219	12.7561	GeneID:101114387	four-jointed box kinase 1	GO:0005615,GO:0007267,GO:0010842	extracellular space|cell-cell signaling|retina layer formation
FNDC1	19.2373	28.4396	10.0351	0.353276	-1.50113	0.00385954	0.0200264	Down	0.0601533	0.0370544	0.0327796	0.0971171	0.102984	0.141976	GeneID:101110947	fibronectin type III domain containing 1	GO:0005576,GO:0016607	extracellular region|nuclear speck
FRAT2	71.1686	38.9813	103.356	2.65181	1.40698	3.10565e-07	6.58231e-06	Up	1.39319	1.18584	1.39916	0.376137	0.48417	0.533163	GeneID:101108269	FRAT regulator of WNT signaling pathway 2	GO:0016055	Wnt signaling pathway	oas04310,oas05200,oas05224,oas05225,oas05226	Wnt signaling pathway|Pathways in cancer|Breast cancer|Hepatocellular carcinoma|Gastric cancer
FRRS1	23.2079	12.6418	33.774	2.67434	1.41918	0.00350051	0.0184868	Up	0.473901	0.227741	0.401791	0.127401	0.10789	0.146989	GeneID:101111238	ferric chelate reductase 1	GO:0016021,GO:0016491,GO:0046872	integral component of membrane|oxidoreductase activity|metal ion binding
FRZB	52.542	74.4441	30.6399	0.41092	-1.28307	7.67143e-05	0.000784336	Down	0.258337	0.378893	0.273383	0.709171	0.552848	0.797395	GeneID:101118419	frizzled related protein	GO:0005615,GO:0005737,GO:0008285,GO:0010721,GO:0014033,GO:0017147,GO:0030178,GO:0030308,GO:0035567,GO:0043065,GO:0045600,GO:0060029,GO:0060070,GO:0061037,GO:0061053,GO:0070367,GO:0090090,GO:0090103	extracellular space|cytoplasm|negative regulation of cell proliferation|negative regulation of cell development|neural crest cell differentiation|Wnt-protein binding|negative regulation of Wnt signaling pathway|negative regulation of cell growth|non-canonical Wnt signaling pathway|positive regulation of apoptotic process|positive regulation of fat cell differentiation|convergent extension involve…
FSIP1	47.9696	28.783	67.1562	2.33146	1.22123	0.000356218	0.00286379	Up	0.420878	0.500987	0.398872	0.141296	0.143589	0.241356	GeneID:101106849	fibrous sheath interacting protein 1
FTO	13221.3	1024.69	25418	24.8053	4.63258	0	0	Up	277.241	350.733	396.83	13.2874	12.5013	12.6075	GeneID:100125353	FTO alpha-ketoglutarate dependent dioxygenase	GO:0001659,GO:0005634,GO:0005654,GO:0006307,GO:0008198,GO:0010883,GO:0016607,GO:0035515,GO:0035516,GO:0035552,GO:0035553,GO:0040014,GO:0042245,GO:0043734,GO:0044065,GO:0060612,GO:0070350,GO:0070989,GO:0080111,GO:0090335,GO:1990931	temperature homeostasis|nucleus|nucleoplasm|DNA dealkylation involved in DNA repair|ferrous iron binding|regulation of lipid storage|nuclear speck|oxidative RNA demethylase activity|oxidative DNA demethylase activity|oxidative single-stranded DNA demethylation|oxidative single-stranded RNA demethylation|regulation of multicellular organism growth|RNA repair|DNA-N1-methyladenine dioxygenase activi…
FXYD2	4.1402	7.02803	1.25237	0.178693	-2.48445	0.0354915	0.115847	Down	0.05825	0.0299016	0.0297585	0.122666	0.311642	0.181964	GeneID:114118392	FXYD domain containing ion transport regulator 2	GO:0005216,GO:0006813,GO:0006814,GO:0016021	ion channel activity|potassium ion transport|sodium ion transport|integral component of membrane	oas04022,oas04024,oas04260,oas04261,oas04911,oas04918,oas04919,oas04960,oas04961,oas04964,oas04970,oas04972,oas04973,oas04974,oas04976,oas04978	cGMP-PKG signaling pathway|cAMP signaling pathway|Cardiac muscle contraction|Adrenergic signaling in cardiomyocytes|Insulin secretion|Thyroid hormone synthesis|Thyroid hormone signaling pathway|Aldosterone-regulated sodium reabsorption|Endocrine and other factor-regulated calcium reabsorption|Proximal tubule bicarbonate reclamation|Salivary secretion|Pancreatic secretion|Carbohydrate digestion an…
FZD4	398.112	255.602	540.622	2.11454	1.08034	1.71042e-11	9.45639e-10	Up	2.10319	2.43118	2.26037	0.795585	0.937685	1.25317	GeneID:101101932	frizzled class receptor 4	GO:0001540,GO:0001570,GO:0004930,GO:0005886,GO:0005887,GO:0005911,GO:0007223,GO:0007605,GO:0009986,GO:0010812,GO:0016055,GO:0017147,GO:0019955,GO:0030165,GO:0030182,GO:0030425,GO:0030665,GO:0030669,GO:0030947,GO:0031625,GO:0031987,GO:0034446,GO:0035426,GO:0035567,GO:0038023,GO:0042701,GO:0042803,GO:0042813,GO:0043507,GO:0044877,GO:0045893,GO:0046982,GO:0051091,GO:0060070,GO:0060071,GO:0061024,GO:…	amyloid-beta binding|vasculogenesis|G protein-coupled receptor activity|plasma membrane|integral component of plasma membrane|cell-cell junction|Wnt signaling pathway, calcium modulating pathway|sensory perception of sound|cell surface|negative regulation of cell-substrate adhesion|Wnt signaling pathway|Wnt-protein binding|cytokine binding|PDZ domain binding|neuron differentiation|dendrite|clathr…	oas04150,oas04310,oas04390,oas04550,oas04916,oas04934,oas05165,oas05200,oas05205,oas05217,oas05224,oas05225,oas05226	mTOR signaling pathway|Wnt signaling pathway|Hippo signaling pathway|Signaling pathways regulating pluripotency of stem cells|Melanogenesis|Cushing syndrome|Human papillomavirus infection|Pathways in cancer|Proteoglycans in cancer|Basal cell carcinoma|Breast cancer|Hepatocellular carcinoma|Gastric cancer
GABRA2	17.8555	7.02159	28.6895	4.08328	2.02973	0.000683244	0.0048656	Up	0.0538027	0.0951311	0.12827	0.00944176	0.0255865	0.0280118	GeneID:101121265	gamma-aminobutyric acid type A receptor alpha2 subunit	GO:0004890,GO:0005237,GO:0005254,GO:0005887,GO:0007165,GO:0007214,GO:0007268,GO:0022851,GO:0030054,GO:0030659,GO:0032590,GO:0034220,GO:0034707,GO:0042391,GO:0043005,GO:0045202,GO:0045211,GO:0050877,GO:0051932,GO:0060078,GO:0098794,GO:1902476,GO:1902711,GO:1904315	GABA-A receptor activity|inhibitory extracellular ligand-gated ion channel activity|chloride channel activity|integral component of plasma membrane|signal transduction|gamma-aminobutyric acid signaling pathway|chemical synaptic transmission|GABA-gated chloride ion channel activity|cell junction|cytoplasmic vesicle membrane|dendrite membrane|ion transmembrane transport|chloride channel complex|reg…	oas04080,oas04723,oas04727,oas04742,oas05032,oas05033	Neuroactive ligand-receptor interaction|Retrograde endocannabinoid signaling|GABAergic synapse|Taste transduction|Morphine addiction|Nicotine addiction
GABRE	197.664	263.774	131.555	0.498648	-1.00391	1.01804e-08	3.16368e-07	Down	1.34611	1.2757	1.04036	2.26233	2.15131	2.417	GeneID:101106150	gamma-aminobutyric acid type A receptor epsilon subunit	GO:0004890,GO:0005237,GO:0005254,GO:0005887,GO:0007165,GO:0007214,GO:0007268,GO:0022851,GO:0030054,GO:0032590,GO:0034220,GO:0034707,GO:0042391,GO:0043005,GO:0045202,GO:0045211,GO:0050877,GO:0051932,GO:0060078,GO:0098794,GO:1902476,GO:1902711,GO:1904315,GO:2001226	GABA-A receptor activity|inhibitory extracellular ligand-gated ion channel activity|chloride channel activity|integral component of plasma membrane|signal transduction|gamma-aminobutyric acid signaling pathway|chemical synaptic transmission|GABA-gated chloride ion channel activity|cell junction|dendrite membrane|ion transmembrane transport|chloride channel complex|regulation of membrane potential…	oas04080,oas04723,oas04727,oas05032,oas05033	Neuroactive ligand-receptor interaction|Retrograde endocannabinoid signaling|GABAergic synapse|Morphine addiction|Nicotine addiction
GABRR1	48.9678	31.2981	66.6376	2.13143	1.09182	0.00535915	0.026215	Up	1.34118	0.713354	1.43639	0.595492	0.691604	0.235561	GeneID:101114365	gamma-aminobutyric acid type A receptor rho1 subunit	GO:0004890,GO:0005254,GO:0005886,GO:0005887,GO:0007165,GO:0007214,GO:0007268,GO:0030054,GO:0034220,GO:0034707,GO:0042391,GO:0043005,GO:0045202,GO:0045211,GO:0050877,GO:0098978,GO:0098982,GO:0099507,GO:1902711,GO:1904315	GABA-A receptor activity|chloride channel activity|plasma membrane|integral component of plasma membrane|signal transduction|gamma-aminobutyric acid signaling pathway|chemical synaptic transmission|cell junction|ion transmembrane transport|chloride channel complex|regulation of membrane potential|neuron projection|synapse|postsynaptic membrane|nervous system process|glutamatergic synapse|GABA-erg…	oas04080,oas04723,oas04727,oas05032,oas05033	Neuroactive ligand-receptor interaction|Retrograde endocannabinoid signaling|GABAergic synapse|Morphine addiction|Nicotine addiction
GABRR2	6.20363	10.1912	2.21602	0.216723	-2.20608	0.0188605	0.0710017	Down	0.0159536	0.049137	0.0489019	0.151182	0.204847	0.132897	GeneID:101110852	gamma-aminobutyric acid type A receptor rho2 subunit	GO:0004890,GO:0005230,GO:0005254,GO:0005887,GO:0007165,GO:0007268,GO:0030054,GO:0034220,GO:0034707,GO:0042391,GO:0043005,GO:0045202,GO:0045211,GO:0050877,GO:1902711	GABA-A receptor activity|extracellular ligand-gated ion channel activity|chloride channel activity|integral component of plasma membrane|signal transduction|chemical synaptic transmission|cell junction|ion transmembrane transport|chloride channel complex|regulation of membrane potential|neuron projection|synapse|postsynaptic membrane|nervous system process|GABA-A receptor complex	oas04080,oas04723,oas04727,oas05032,oas05033	Neuroactive ligand-receptor interaction|Retrograde endocannabinoid signaling|GABAergic synapse|Morphine addiction|Nicotine addiction
GALNT5	520.528	280.959	760.096	2.70474	1.43549	3.77083e-29	2.06873e-26	Up	3.47494	4.02071	3.90178	1.25223	1.21787	1.44639	GeneID:101113990	polypeptide N-acetylgalactosaminyltransferase 5			oas00512	Mucin type O-glycan biosynthesis
GALNT6	170.409	71.6951	269.123	3.75409	1.90846	6.77769e-20	1.36165e-17	Up	1.46959	1.69814	2.00613	0.444794	0.509308	0.328355	GeneID:101114859	polypeptide N-acetylgalactosaminyltransferase 6	GO:0000139,GO:0004653,GO:0005794,GO:0006486,GO:0016021,GO:0030246,GO:0046872	Golgi membrane|polypeptide N-acetylgalactosaminyltransferase activity|Golgi apparatus|protein glycosylation|integral component of membrane|carbohydrate binding|metal ion binding	oas00512	Mucin type O-glycan biosynthesis
GAS6	897.502	1280.72	514.288	0.401427	-1.31679	9.17237e-31	5.94703e-28	Down	6.38752	7.06411	5.56566	15.2262	14.0376	14.8189	GeneID:101120928	growth arrest specific 6			oas01521	EGFR tyrosine kinase inhibitor resistance
GAS7	536.726	281.521	791.931	2.81279	1.492	2.54019e-06	4.15997e-05	Up	1.81162	2.67932	2.56491	0.616452	0.656003	1.05823	GeneID:101111467	growth arrest specific 7	GO:0001726,GO:0005737,GO:0005856,GO:0005884,GO:0005886,GO:0008092,GO:0008360,GO:0030041,GO:0030182,GO:0048812,GO:0051015,GO:0051017	ruffle|cytoplasm|cytoskeleton|actin filament|plasma membrane|cytoskeletal protein binding|regulation of cell shape|actin filament polymerization|neuron differentiation|neuron projection morphogenesis|actin filament binding|actin filament bundle assembly
GGCT	28.8855	17.5667	40.2044	2.28602	1.19284	0.00721485	0.033395	Up	0.591074	1.23534	0.905897	0.46677	0.316229	0.329718	GeneID:101102474	gamma-glutamylcyclotransferase	GO:0001836,GO:0003839,GO:0005829,GO:0042803	release of cytochrome c from mitochondria|gamma-glutamylcyclotransferase activity|cytosol|protein homodimerization activity	oas00480	Glutathione metabolism
GIPR	1.73718	0	3.47437	17.9123	4.16288	0.0330263	0.109383	Up	0.0402244	0.0412971	0.00821989	0	0	0	GeneID:101114380	gastric inhibitory polypeptide receptor	GO:0002029,GO:0004888,GO:0005886,GO:0006091,GO:0007166,GO:0007186,GO:0007190,GO:0007204,GO:0007584,GO:0008528,GO:0009749,GO:0016021,GO:0016519,GO:0017046,GO:0031018,GO:0032024,GO:0043950,GO:0048678,GO:0050796,GO:0051592,GO:0070542	desensitization of G protein-coupled receptor signaling pathway|transmembrane signaling receptor activity|plasma membrane|generation of precursor metabolites and energy|cell surface receptor signaling pathway|G protein-coupled receptor signaling pathway|activation of adenylate cyclase activity|positive regulation of cytosolic calcium ion concentration|response to nutrient|G protein-coupled peptid…	oas04024,oas04080	cAMP signaling pathway|Neuroactive ligand-receptor interaction
GJA5	59.1925	87.4054	30.9797	0.355018	-1.49404	9.45398e-06	0.00012843	Down	0.460364	0.23632	0.352784	0.815231	0.694113	1.2311	GeneID:101115082	gap junction protein alpha 5	GO:0005922,GO:0007154,GO:0016021	connexin complex|cell communication|integral component of membrane
GJC2	40.6629	65.3557	15.97	0.244899	-2.02974	7.98392e-08	1.98402e-06	Down	0.123017	0.0688897	0.0971267	0.435688	0.353009	0.308594	GeneID:101122355	gap junction protein gamma 2	GO:0005922,GO:0007154,GO:0016021	connexin complex|cell communication|integral component of membrane
GLI2	46.8996	24.9362	68.863	2.76383	1.46667	3.65233e-05	0.000418449	Up	0.345329	0.196039	0.365295	0.0983881	0.0956373	0.109991	GeneID:101114169	GLI family zinc finger 2	GO:0000122,GO:0000978,GO:0000981,GO:0001077,GO:0001501,GO:0001649,GO:0001701,GO:0001822,GO:0002062,GO:0002076,GO:0003700,GO:0005634,GO:0005654,GO:0005730,GO:0005829,GO:0005929,GO:0005930,GO:0007224,GO:0007389,GO:0007411,GO:0007418,GO:0007442,GO:0007507,GO:0008134,GO:0008270,GO:0008283,GO:0008589,GO:0009913,GO:0009952,GO:0009954,GO:0016020,GO:0016607,GO:0021508,GO:0021513,GO:0021517,GO:0021696,GO:…	negative regulation of transcription by RNA polymerase II|RNA polymerase II proximal promoter sequence-specific DNA binding|DNA-binding transcription factor activity, RNA polymerase II-specific|proximal promoter DNA-binding transcription activator activity, RNA polymerase II-specific|skeletal system development|osteoblast differentiation|in utero embryonic development|kidney development|chondrocy…	oas04340,oas04390,oas05200,oas05217	Hedgehog signaling pathway|Hippo signaling pathway|Pathways in cancer|Basal cell carcinoma
GLRA3	21.7968	11.6018	31.9917	2.75999	1.46466	0.00381427	0.0198203	Up	0.374952	0.259841	0.33522	0.167789	0.100301	0.0585645	GeneID:101119614	glycine receptor alpha 3	GO:0004888,GO:0005886,GO:0005887,GO:0007165,GO:0007218,GO:0007268,GO:0016594,GO:0016934,GO:0016935,GO:0022852,GO:0030054,GO:0030425,GO:0034220,GO:0042391,GO:0043005,GO:0043200,GO:0043204,GO:0045202,GO:0045211,GO:0046872,GO:0050877,GO:0051260,GO:0060012,GO:1902476	transmembrane signaling receptor activity|plasma membrane|integral component of plasma membrane|signal transduction|neuropeptide signaling pathway|chemical synaptic transmission|glycine binding|extracellularly glycine-gated chloride channel activity|glycine-gated chloride channel complex|glycine-gated chloride ion channel activity|cell junction|dendrite|ion transmembrane transport|regulation of m…	oas04080	Neuroactive ligand-receptor interaction
GLT1D1	111.46	151.332	71.5877	0.473285	-1.07922	3.4595e-06	5.39748e-05	Down	0.823724	0.634267	0.707744	1.25171	1.262	1.73495	GeneID:101114727	glycosyltransferase 1 domain containing 1	GO:0005576,GO:0016757	extracellular region|transferase activity, transferring glycosyl groups
GNAT2	3.83348	1.05191	6.61505	6.27984	2.65073	0.0407041	0.128335	Up	0.0218699	0.0199583	0.00993139	0	0.00260012	0.0050606	GeneID:100233166	G protein subunit alpha transducin 2	GO:0001580,GO:0001664,GO:0001750,GO:0001917,GO:0003924,GO:0005525,GO:0005834,GO:0007188,GO:0007602,GO:0031683,GO:0042622,GO:0046549,GO:0046872,GO:0050908	detection of chemical stimulus involved in sensory perception of bitter taste|G protein-coupled receptor binding|photoreceptor outer segment|photoreceptor inner segment|GTPase activity|GTP binding|heterotrimeric G-protein complex|adenylate cyclase-modulating G protein-coupled receptor signaling pathway|phototransduction|G-protein beta/gamma-subunit complex binding|photoreceptor outer segment memb…	oas04744	Phototransduction
GNG4	488.927	693.768	284.087	0.409337	-1.28864	1.16559e-15	1.28884e-13	Down	1.68545	2.08391	1.76532	4.80876	4.65408	3.13262	GeneID:101114927	G protein subunit gamma 4	GO:0003924,GO:0005834,GO:0007186,GO:0030308	GTPase activity|heterotrimeric G-protein complex|G protein-coupled receptor signaling pathway|negative regulation of cell growth	oas04014,oas04062,oas04151,oas04371,oas04713,oas04723,oas04724,oas04725,oas04726,oas04727,oas04728,oas04926,oas05032,oas05034,oas05163,oas05167,oas05170,oas05200	Ras signaling pathway|Chemokine signaling pathway|PI3K-Akt signaling pathway|Apelin signaling pathway|Circadian entrainment|Retrograde endocannabinoid signaling|Glutamatergic synapse|Cholinergic synapse|Serotonergic synapse|GABAergic synapse|Dopaminergic synapse|Relaxin signaling pathway|Morphine addiction|Alcoholism|Human cytomegalovirus infection|Kaposi sarcoma-associated herpesvirus infection|…
GPR135	21.4793	29.1637	13.7948	0.473527	-1.07848	0.0414936	0.12991	Down	0.200791	0.111662	0.0598379	0.343555	0.187993	0.200368	GeneID:105613058	G protein-coupled receptor 135	GO:0004930,GO:0005768,GO:0005886,GO:0010008,GO:0016021,GO:1990763	G protein-coupled receptor activity|endosome|plasma membrane|endosome membrane|integral component of membrane|arrestin family protein binding
GPR183	6.0549	10.5425	1.56735	0.149004	-2.74658	0.00657456	0.0310015	Down	0.00392434	0.00402898	0.0120291	0.0495847	0.041991	0.0326907	GeneID:101111463	G protein-coupled receptor 183	GO:0002250,GO:0002313,GO:0002407,GO:0004930,GO:0005886,GO:0006959,GO:0007186,GO:0008142,GO:0010818,GO:0016021,GO:0030316,GO:0030595,GO:0030890,GO:0036145,GO:0061470,GO:0070374,GO:2000458	adaptive immune response|mature B cell differentiation involved in immune response|dendritic cell chemotaxis|G protein-coupled receptor activity|plasma membrane|humoral immune response|G protein-coupled receptor signaling pathway|oxysterol binding|T cell chemotaxis|integral component of membrane|osteoclast differentiation|leukocyte chemotaxis|positive regulation of B cell proliferation|dendritic …
GPR25	17.5172	27.786	7.24838	0.260721	-1.93942	0.00145648	0.00907215	Down	0.140482	0.192304	0.215307	0.838203	0.876855	0.243802	GeneID:114117307	G protein-coupled receptor 25	GO:0004930,GO:0005886,GO:0005887,GO:0007186	G protein-coupled receptor activity|plasma membrane|integral component of plasma membrane|G protein-coupled receptor signaling pathway
GRIK1	12.8134	19.6732	5.95364	0.30315	-1.7219	0.00832122	0.0373839	Down	0.0795595	0.0453784	0.0451612	0.251312	0.113506	0.156483	GeneID:101107319	glutamate ionotropic receptor kainate type subunit 1	GO:0004970,GO:0005234,GO:0005886,GO:0007268,GO:0007399,GO:0008066,GO:0008144,GO:0008328,GO:0015277,GO:0016595,GO:0022843,GO:0030054,GO:0030425,GO:0032229,GO:0032230,GO:0032983,GO:0035235,GO:0035249,GO:0042734,GO:0042803,GO:0043025,GO:0043195,GO:0043235,GO:0045211,GO:0048167,GO:0048172,GO:0050804,GO:0051967,GO:0098978,GO:0099056	ionotropic glutamate receptor activity|extracellularly glutamate-gated ion channel activity|plasma membrane|chemical synaptic transmission|nervous system development|glutamate receptor activity|drug binding|ionotropic glutamate receptor complex|kainate selective glutamate receptor activity|glutamate binding|voltage-gated cation channel activity|cell junction|dendrite|negative regulation of synapt…	oas04080,oas04724	Neuroactive ligand-receptor interaction|Glutamatergic synapse
GRM8	53.3614	79.0349	27.6879	0.350288	-1.51339	2.34214e-06	3.87118e-05	Down	0.250325	0.226765	0.180544	0.465133	0.677508	0.605649	GeneID:101108742	glutamate metabotropic receptor 8			oas04072,oas04080,oas04724	Phospholipase D signaling pathway|Neuroactive ligand-receptor interaction|Glutamatergic synapse
GSDMB	25.8511	40.0895	11.6126	0.289976	-1.786	0.000393229	0.00309037	Down	0.188377	0.148769	0.20728	0.793391	0.697728	0.256508	GeneID:101105086	gasdermin B
GSG1L	36.5273	65.4309	7.62367	0.116035	-3.10737	4.65944e-08	1.22624e-06	Down	0.107338	0.238767	0.091394	1.7518	1.45481	0.316678	GeneID:101120720	GSG1 like	GO:0005886,GO:0030054,GO:0098685,GO:0098978,GO:0099061,GO:0099149,GO:2000311	plasma membrane|cell junction|Schaffer collateral - CA1 synapse|glutamatergic synapse|integral component of postsynaptic density membrane|regulation of postsynaptic neurotransmitter receptor internalization|regulation of AMPA receptor activity
GSTA1-1	15.881	8.43086	23.3312	2.76595	1.46778	0.00843161	0.0378203	Up	0.499218	0.658967	0.631524	0.200245	0.203494	0.198029	GeneID:443054	microsomal glutathione-S-transferase 1-1	GO:0004364,GO:0005737,GO:0006749	glutathione transferase activity|cytoplasm|glutathione metabolic process	oas00480,oas00980,oas00982,oas00983,oas01524,oas05200,oas05204,oas05225,oas05418	Glutathione metabolism|Metabolism of xenobiotics by cytochrome P450|Drug metabolism - cytochrome P450|Drug metabolism - other enzymes|Platinum drug resistance|Pathways in cancer|Chemical carcinogenesis|Hepatocellular carcinoma|Fluid shear stress and atherosclerosis
GZMM	15.2828	21.4399	9.12576	0.425626	-1.23234	0.0440226	0.135866	Down	0.159472	0.120064	0.0325881	0.246272	0.273019	0.166055	GeneID:101108227	granzyme M	GO:0001913,GO:0004252,GO:0005576,GO:0006915,GO:0008219,GO:0008236,GO:0016020,GO:0019835,GO:0045087	T cell mediated cytotoxicity|serine-type endopeptidase activity|extracellular region|apoptotic process|cell death|serine-type peptidase activity|membrane|cytolysis|innate immune response
HAPLN3	90.3063	127.571	53.0417	0.416141	-1.26486	7.60875e-07	1.42617e-05	Down	0.431537	0.312737	0.343662	0.855302	0.943874	0.634378	GeneID:101102761	hyaluronan and proteoglycan link protein 3	GO:0005540,GO:0005615,GO:0007155,GO:0007417,GO:0031012	hyaluronic acid binding|extracellular space|cell adhesion|central nervous system development|extracellular matrix
HERC6	9.8413	4.21543	15.4672	3.66671	1.87449	0.0124793	0.051714	Up	0.0593268	0.121818	0.148176	0.0277631	0.0282136	0.0274559	GeneID:101103321	HECT and RLD domain containing E3 ubiquitin protein ligase family member 6	GO:0000209,GO:0002244,GO:0004842,GO:0005634,GO:0005829,GO:0009617	protein polyubiquitination|hematopoietic progenitor cell differentiation|ubiquitin-protein transferase activity|nucleus|cytosol|response to bacterium
HIC2	30.1019	44.2788	15.925	0.360717	-1.47106	0.000688209	0.00488632	Down	0.320493	0.12339	0.245598	0.646792	0.657286	0.472774	GeneID:114118892	HIC ZBTB transcriptional repressor 2	GO:0000977,GO:0000981,GO:0001227,GO:0003677,GO:0005634,GO:0008022,GO:0045892,GO:0046872	RNA polymerase II regulatory region sequence-specific DNA binding|DNA-binding transcription factor activity, RNA polymerase II-specific|DNA-binding transcription repressor activity, RNA polymerase II-specific|DNA binding|nucleus|protein C-terminus binding|negative regulation of transcription, DNA-templated|metal ion binding
HMMR	25.9368	16.1468	35.7268	2.2137	1.14646	0.0109495	0.0465664	Up	0.360372	0.230211	0.335481	0.11805	0.0942586	0.175116	GeneID:443128	hyaluronan mediated motility receptor	GO:0005540,GO:0005813,GO:0005829,GO:0005886,GO:0009986,GO:0010389,GO:0015630,GO:0016020,GO:0030214	hyaluronic acid binding|centrosome|cytosol|plasma membrane|cell surface|regulation of G2/M transition of mitotic cell cycle|microtubule cytoskeleton|membrane|hyaluronan catabolic process	oas04512	ECM-receptor interaction
HRK	4.1425	7.03264	1.25237	0.178589	-2.48528	0.0379	0.121566	Down	0.0102714	0.00527265	0.00524742	0.059483	0.0329717	0.0160431	GeneID:105606344	harakiri, BCL2 interacting protein			oas04210	Apoptosis
HS3ST6	1.40584	2.81168	0	0.0617577	-4.01724	0.0496444	0.148361	Down	0	0	0	0.0712409	0.0723968	0.0469684	GeneID:105604608	heparan sulfate-glucosamine 3-sulfotransferase 6	GO:0000139,GO:0001835,GO:0006024,GO:0008467,GO:0016021	Golgi membrane|blastocyst hatching|glycosaminoglycan biosynthetic process|[heparan sulfate]-glucosamine 3-sulfotransferase 1 activity|integral component of membrane
HSD11B1	31.2219	43.9113	18.5325	0.422276	-1.24374	0.00243718	0.0138945	Down	0.249132	0.191832	0.180307	0.327899	0.577579	0.464788	GeneID:443409	hydroxysteroid 11-beta dehydrogenase 1	GO:0005789,GO:0008202,GO:0016021,GO:0070524	endoplasmic reticulum membrane|steroid metabolic process|integral component of membrane|11-beta-hydroxysteroid dehydrogenase (NADP+) activity	oas00140,oas00980,oas05204	Steroid hormone biosynthesis|Metabolism of xenobiotics by cytochrome P450|Chemical carcinogenesis
HSD17B14	928.659	581.851	1275.47	2.19234	1.13247	4.32385e-25	1.58142e-22	Up	34.2458	29.7645	30.9407	14.6078	13.8831	11.7825	GeneID:101123575	hydroxysteroid 17-beta dehydrogenase 14	GO:0004303,GO:0005829,GO:0006706,GO:0042802,GO:0047045	estradiol 17-beta-dehydrogenase activity|cytosol|steroid catabolic process|identical protein binding|testosterone 17-beta-dehydrogenase (NADP+) activity
HSH2D	120.475	183.955	56.9948	0.309816	-1.69051	0.00246962	0.0140491	Down	1.21816	1.2314	0.995727	4.14391	4.95311	1.28796	GeneID:101117244	hematopoietic SH2 domain containing	GO:0002903,GO:0005070,GO:0005634,GO:0005737,GO:0005739,GO:0005829,GO:0007165,GO:0042110,GO:0051902	negative regulation of B cell apoptotic process|SH3/SH2 adaptor activity|nucleus|cytoplasm|mitochondrion|cytosol|signal transduction|T cell activation|negative regulation of mitochondrial depolarization
HSPA12A	73.7394	25.9772	121.502	4.67335	2.22446	3.14946e-13	2.36442e-11	Up	0.379749	0.542911	0.467787	0.0822121	0.0721533	0.121954	GeneID:101120879	heat shock protein family A (Hsp70) member 12A	GO:0005524,GO:0070062	ATP binding|extracellular exosome
HSPB3	5.2413	9.85005	0.632554	0.0639756	-3.96634	0.00359536	0.0188892	Down	0.0149757	0.0153751	0	0.157684	0.240364	0.0467818	GeneID:101118384	heat shock protein family B (small) member 3	GO:0005634,GO:0005737	nucleus|cytoplasm
HVCN1	15.0367	22.8249	7.24838	0.317269	-1.65622	0.0042199	0.0215513	Down	0.0900076	0.12321	0.137948	0.284316	0.337083	0.406134	GeneID:101104785	hydrogen voltage gated channel 1	GO:0005886,GO:0005887,GO:0009268,GO:0010043,GO:0016021,GO:0022843,GO:0030171,GO:0030667,GO:0034765,GO:0035036,GO:0035579,GO:0042802,GO:0043312,GO:0071294,GO:0071467,GO:1902600	plasma membrane|integral component of plasma membrane|response to pH|response to zinc ion|integral component of membrane|voltage-gated cation channel activity|voltage-gated proton channel activity|secretory granule membrane|regulation of ion transmembrane transport|sperm-egg recognition|specific granule membrane|identical protein binding|neutrophil degranulation|cellular response to zinc ion|cell…
IBSP	146.335	238.54	54.1293	0.226875	-2.14003	4.7049e-24	1.56071e-21	Down	0.813387	0.736833	0.537758	2.83381	3.00778	2.72772	GeneID:101120495	integrin binding sialoprotein	GO:0005178,GO:0005615,GO:0007155,GO:0030198,GO:0030282,GO:0031012,GO:0031982,GO:0045785,GO:0071363	integrin binding|extracellular space|cell adhesion|extracellular matrix organization|bone mineralization|extracellular matrix|vesicle|positive regulation of cell adhesion|cellular response to growth factor stimulus	oas04151,oas04510,oas04512,oas05165	PI3K-Akt signaling pathway|Focal adhesion|ECM-receptor interaction|Human papillomavirus infection
ICAM3	38.4131	55.5191	21.3072	0.384413	-1.37927	0.00017688	0.00159989	Down	0.370751	0.223132	0.287377	0.767289	0.766059	0.599052	GeneID:101113326	intercellular adhesion molecule 3	GO:0005178,GO:0005887,GO:0006909,GO:0007155,GO:0098609	integrin binding|integral component of plasma membrane|phagocytosis|cell adhesion|cell-cell adhesion	oas04514	Cell adhesion molecules (CAMs)
IDH1	2898.04	1920.03	3876.06	2.01892	1.01358	1.73724e-25	6.69729e-23	Up	46.8566	37.7884	47.8111	21.4416	20.8283	18.6625	GeneID:443257	isocitrate dehydrogenase (NADP(+)) 1, cytosolic	GO:0000287,GO:0004450,GO:0005829,GO:0006097,GO:0006099,GO:0006102,GO:0006103,GO:0051287	magnesium ion binding|isocitrate dehydrogenase (NADP+) activity|cytosol|glyoxylate cycle|tricarboxylic acid cycle|isocitrate metabolic process|2-oxoglutarate metabolic process|NAD binding	oas00020,oas00480,oas04146	Citrate cycle (TCA cycle)|Glutathione metabolism|Peroxisome
IFI44	127.753	49.5192	205.986	4.16113	2.05698	6.69353e-17	8.67969e-15	Up	1.25677	0.853337	1.22784	0.30051	0.176802	0.265902	GeneID:101110473	interferon induced protein 44	GO:0005737,GO:0006955,GO:0009617	cytoplasm|immune response|response to bacterium
IFI44L	139.757	72.3804	207.133	2.86377	1.51791	5.62324e-10	2.33168e-08	Up	3.45547	1.77381	2.87636	0.852346	0.995455	0.780011	GeneID:101103357	interferon induced protein 44 like	GO:0005525,GO:0005737,GO:0006955,GO:0051607	GTP binding|cytoplasm|immune response|defense response to virus
IFIT1	1012.41	633.115	1391.7	2.19837	1.13644	2.56456e-27	1.21936e-24	Up	12.2731	10.7334	10.6285	4.96423	4.95669	4.30928	GeneID:101102194	interferon induced protein with tetratricopeptide repeats 1	GO:0003723,GO:0005737,GO:0009615,GO:0050688,GO:0051607,GO:0071357,GO:0071360	RNA binding|cytoplasm|response to virus|regulation of defense response to virus|defense response to virus|cellular response to type I interferon|cellular response to exogenous dsRNA	oas05160	Hepatitis C
IGF2	11.9307	20.3674	3.49387	0.170603	-2.55129	0.000420275	0.00326514	Down	0.0285576	0.0586383	0.0194525	0.230531	0.132414	0.218068	GeneID:443325	insulin like growth factor 2	GO:0000122,GO:0001503,GO:0001701,GO:0001892,GO:0005178,GO:0005179,GO:0005615,GO:0006006,GO:0008083,GO:0008284,GO:0031056,GO:0051147,GO:0051781,GO:0060669	negative regulation of transcription by RNA polymerase II|ossification|in utero embryonic development|embryonic placenta development|integrin binding|hormone activity|extracellular space|glucose metabolic process|growth factor activity|positive regulation of cell proliferation|regulation of histone modification|regulation of muscle cell differentiation|positive regulation of cell division|embryon…	oas04010,oas04014,oas04151,oas05200,oas05205,oas05225	MAPK signaling pathway|Ras signaling pathway|PI3K-Akt signaling pathway|Pathways in cancer|Proteoglycans in cancer|Hepatocellular carcinoma
IL18R1	64.5278	90.9989	38.0566	0.418245	-1.25758	2.30439e-05	0.000279575	Down	0.563348	0.474264	0.345362	1.22192	0.95241	0.903369	GeneID:101102552	interleukin 18 receptor 1	GO:0004908,GO:0005886,GO:0006954,GO:0006955,GO:0007165,GO:0016021,GO:0030101,GO:0032729,GO:0035655,GO:0038023,GO:0042007,GO:0042008,GO:0045063,GO:0051092,GO:0071345,GO:0120163,GO:1901224,GO:2000556	interleukin-1 receptor activity|plasma membrane|inflammatory response|immune response|signal transduction|integral component of membrane|natural killer cell activation|positive regulation of interferon-gamma production|interleukin-18-mediated signaling pathway|signaling receptor activity|interleukin-18 binding|interleukin-18 receptor activity|T-helper 1 cell differentiation|positive regulation of…	oas04060,oas04668,oas05321	Cytokine-cytokine receptor interaction|TNF signaling pathway|Inflammatory bowel disease (IBD)
IL18RAP	23.9494	39.3854	8.51349	0.215972	-2.21108	5.52638e-05	0.000594034	Down	0.113555	0.145728	0.130528	0.881793	0.561961	0.236484	GeneID:101109262	interleukin 18 receptor accessory protein	GO:0005886,GO:0006954,GO:0006955,GO:0008283,GO:0032609,GO:0032635,GO:0035655,GO:0035744,GO:0042008,GO:0042119,GO:0045092,GO:0045954,GO:0051092,GO:0070301	plasma membrane|inflammatory response|immune response|cell proliferation|interferon-gamma production|interleukin-6 production|interleukin-18-mediated signaling pathway|T-helper 1 cell cytokine production|interleukin-18 receptor activity|neutrophil activation|interleukin-18 receptor complex|positive regulation of natural killer cell mediated cytotoxicity|positive regulation of NF-kappaB transcript…	oas04060,oas05321	Cytokine-cytokine receptor interaction|Inflammatory bowel disease (IBD)
IL1R2	120.451	165.214	75.6882	0.457515	-1.12811	6.28826e-05	0.00066245	Down	0.932811	1.63967	0.866456	2.73821	2.7524	1.53056	GeneID:101103308	interleukin 1 receptor type 2			oas04060,oas04640,oas05146,oas05166,oas05202,oas05215,oas05418	Cytokine-cytokine receptor interaction|Hematopoietic cell lineage|Amoebiasis|Human T-cell leukemia virus 1 infection|Transcriptional misregulation in cancer|Prostate cancer|Fluid shear stress and atherosclerosis
ILDR2	20.5027	6.317	34.6883	5.48584	2.45571	1.12282e-05	0.000148433	Up	0.127398	0.140604	0.087864	0.0134141	0.0170397	0.0298477	GeneID:101110204	immunoglobulin like domain containing receptor 2	GO:0005789,GO:0009749,GO:0016021,GO:0030073,GO:0030154,GO:0031016,GO:0048873	endoplasmic reticulum membrane|response to glucose|integral component of membrane|insulin secretion|cell differentiation|pancreas development|homeostasis of number of cells within a tissue
IMPA2	73.1434	47.0008	99.2859	2.11198	1.0786	0.00282992	0.0155853	Up	0.983284	0.753361	0.6148	0.25497	0.180589	0.595987	GeneID:101105968	inositol monophosphatase 2	GO:0005737,GO:0005829,GO:0006021,GO:0006796,GO:0007165,GO:0008934,GO:0042803,GO:0043647,GO:0046854,GO:0046855,GO:0046872,GO:0052832,GO:0052833	cytoplasm|cytosol|inositol biosynthetic process|phosphate-containing compound metabolic process|signal transduction|inositol monophosphate 1-phosphatase activity|protein homodimerization activity|inositol phosphate metabolic process|phosphatidylinositol phosphorylation|inositol phosphate dephosphorylation|metal ion binding|inositol monophosphate 3-phosphatase activity|inositol monophosphate 4-pho…	oas00562,oas04070	Inositol phosphate metabolism|Phosphatidylinositol signaling system
INA	21.8044	7.37188	36.237	4.91219	2.29637	1.55961e-05	0.000198097	Up	0.319498	0.35325	0.284595	0.0776329	0.0262975	0.0767739	GeneID:101115747	internexin neuronal intermediate filament protein alpha	GO:0005200,GO:0005615,GO:0005654,GO:0005883,GO:0021762,GO:0030154,GO:0031965,GO:0036464,GO:0043209,GO:0045111,GO:0060052,GO:0098685,GO:0098794,GO:0098973,GO:0099184,GO:1990830	structural constituent of cytoskeleton|extracellular space|nucleoplasm|neurofilament|substantia nigra development|cell differentiation|nuclear membrane|cytoplasmic ribonucleoprotein granule|myelin sheath|intermediate filament cytoskeleton|neurofilament cytoskeleton organization|Schaffer collateral - CA1 synapse|postsynapse|structural constituent of postsynaptic actin cytoskeleton|structural const…
INAVA	15.9421	9.82815	22.056	2.24257	1.16515	0.0353991	0.115598	Up	0.164827	0.192298	0.176067	0.0631095	0.0561167	0.101418	GeneID:101108243	innate immunity activator	GO:0000187,GO:0002221,GO:0002367,GO:0005634,GO:0005737,GO:0031398,GO:0032494,GO:0032495,GO:0032731,GO:0032733,GO:0032755,GO:0032874,GO:0034334,GO:0043123,GO:0045087,GO:0060729,GO:0070431,GO:1903409	activation of MAPK activity|pattern recognition receptor signaling pathway|cytokine production involved in immune response|nucleus|cytoplasm|positive regulation of protein ubiquitination|response to peptidoglycan|response to muramyl dipeptide|positive regulation of interleukin-1 beta production|positive regulation of interleukin-10 production|positive regulation of interleukin-6 production|positi…
INHBE	683.822	1084.5	283.143	0.261095	-1.93735	1.34384e-09	5.15284e-08	Down	4.17957	3.43526	3.27282	16.061	14.7672	7.99745	GeneID:101121588	inhibin subunit beta E	GO:0005125,GO:0005160,GO:0005179,GO:0005615,GO:0008083,GO:0010862,GO:0042981,GO:0043408,GO:0048468,GO:0060395	cytokine activity|transforming growth factor beta receptor binding|hormone activity|extracellular space|growth factor activity|positive regulation of pathway-restricted SMAD protein phosphorylation|regulation of apoptotic process|regulation of MAPK cascade|cell development|SMAD protein signal transduction	oas04060,oas04350,oas04550	Cytokine-cytokine receptor interaction|TGF-beta signaling pathway|Signaling pathways regulating pluripotency of stem cells
INPP5J	13.9683	20.4021	7.53451	0.369658	-1.43574	0.031362	0.105184	Down	0.0352613	0.0362016	0.0720567	0.123759	0.194939	0.0428364	GeneID:101103674	inositol polyphosphate-5-phosphatase J	GO:0001726,GO:0004439,GO:0004445,GO:0005737,GO:0005829,GO:0005886,GO:0006661,GO:0010977,GO:0017124,GO:0030426,GO:0031115,GO:0033137,GO:0034485,GO:0043198,GO:0043647,GO:0046855,GO:0046856,GO:0052658,GO:0052659	ruffle|phosphatidylinositol-4,5-bisphosphate 5-phosphatase activity|inositol-polyphosphate 5-phosphatase activity|cytoplasm|cytosol|plasma membrane|phosphatidylinositol biosynthetic process|negative regulation of neuron projection development|SH3 domain binding|growth cone|negative regulation of microtubule polymerization|negative regulation of peptidyl-serine phosphorylation|phosphatidylinositol…	oas00562,oas04070	Inositol phosphate metabolism|Phosphatidylinositol signaling system
IQCF1	11.7345	19.6635	3.80546	0.192669	-2.3758	0.000853117	0.00582959	Down	0.0752488	0.154511	0.0768856	0.581033	0.322069	0.574604	GeneID:101115577	IQ motif containing F1	GO:0001669,GO:0005516,GO:0060474,GO:2000344	acrosomal vesicle|calmodulin binding|positive regulation of flagellated sperm motility involved in capacitation|positive regulation of acrosome reaction
IQCN	173.177	259.533	86.8213	0.334466	-1.58007	0.0019287	0.0114486	Down	0.514184	0.655518	0.409903	1.89193	1.87425	0.647198	GeneID:101111020	IQ motif containing N	GO:0005634,GO:0005739	nucleus|mitochondrion
IRF5	9.05163	14.0304	4.07287	0.29067	-1.78254	0.0409522	0.128836	Down	0.00892063	0.018317	0.0911468	0.103321	0.0572713	0.213644	GeneID:101105408	interferon regulatory factor 5	GO:0003700,GO:0005634,GO:0005737,GO:0006357,GO:0019221,GO:0044212,GO:0045087,GO:0051607	DNA-binding transcription factor activity|nucleus|cytoplasm|regulation of transcription by RNA polymerase II|cytokine-mediated signaling pathway|transcription regulatory region DNA binding|innate immune response|defense response to virus	oas04620	Toll-like receptor signaling pathway
ISG20	22.7599	33.0167	12.5032	0.379528	-1.39772	0.0075199	0.0345352	Down	0.3344	0.187264	0.714411	1.28037	0.715627	1.01296	GeneID:101116513	interferon stimulated exonuclease gene 20	GO:0000175,GO:0000738,GO:0004527,GO:0005634,GO:0005654,GO:0005730,GO:0005737,GO:0006364,GO:0006401,GO:0008283,GO:0008310,GO:0008859,GO:0009615,GO:0015030,GO:0016605,GO:0030619,GO:0030620,GO:0034511,GO:0045071,GO:0046872,GO:0051607,GO:0060337	3'-5'-exoribonuclease activity|DNA catabolic process, exonucleolytic|exonuclease activity|nucleus|nucleoplasm|nucleolus|cytoplasm|rRNA processing|RNA catabolic process|cell proliferation|single-stranded DNA 3'-5' exodeoxyribonuclease activity|exoribonuclease II activity|response to virus|Cajal body|PML body|U1 snRNA binding|U2 snRNA binding|U3 snoRNA binding|negative regulation of viral genome re…
ITGA11	807.426	1091.94	522.909	0.479039	-1.06179	1.16259e-21	3.18909e-19	Down	3.0576	2.46465	2.82634	5.71594	5.53384	4.94803	GeneID:101105162	integrin subunit alpha 11			oas04151,oas04510,oas04512,oas04810,oas05165,oas05410,oas05412,oas05414	PI3K-Akt signaling pathway|Focal adhesion|ECM-receptor interaction|Regulation of actin cytoskeleton|Human papillomavirus infection|Hypertrophic cardiomyopathy (HCM)|Arrhythmogenic right ventricular cardiomyopathy (ARVC)|Dilated cardiomyopathy (DCM)
ITGAD	772.773	476.58	1068.97	2.24307	1.16547	2.56245e-17	3.61889e-15	Up	7.64239	8.05805	8.04058	3.58526	3.82744	2.44252	GeneID:101105872	integrin subunit alpha D	GO:0005886,GO:0006955,GO:0007229,GO:0008305,GO:0009986,GO:0030198,GO:0034113,GO:0046872	plasma membrane|immune response|integrin-mediated signaling pathway|integrin complex|cell surface|extracellular matrix organization|heterotypic cell-cell adhesion|metal ion binding	oas04810	Regulation of actin cytoskeleton
ITGB1BP2	22.6365	32.7002	12.5728	0.384678	-1.37828	0.00557234	0.0270629	Down	0.265506	0.251618	0.313017	0.731157	0.917848	0.361533	GeneID:101106491	integrin subunit beta 1 binding protein 2	GO:0017124,GO:0046872	SH3 domain binding|metal ion binding
JAKMIP2	3.48556	0.701719	6.2694	8.9326	3.15908	0.0310971	0.104498	Up	0.0301138	0.0309168	0.0923066	0.00792695	0	0.00783923	GeneID:101115029	janus kinase and microtubule interacting protein 2	GO:0005794,GO:0008017,GO:0019900	Golgi apparatus|microtubule binding|kinase binding
JMJD7	41.9336	56.5615	27.3058	0.483164	-1.04941	0.0027027	0.015051	Down	0.63883	0.455462	0.471414	0.822121	1.21521	0.979324	GeneID:101116914	jumonji domain containing 7
KCNA1	6.84058	10.8937	2.78749	0.257715	-1.95615	0.0359676	0.117213	Down	0.0191156	0	0.0156252	0.0603824	0.0327264	0.0318476	GeneID:105614925	potassium voltage-gated channel subfamily A member 1	GO:0001964,GO:0005249,GO:0005251,GO:0005267,GO:0005783,GO:0005829,GO:0005886,GO:0005887,GO:0006813,GO:0006937,GO:0007268,GO:0007405,GO:0008076,GO:0009986,GO:0010644,GO:0010960,GO:0015079,GO:0016021,GO:0016324,GO:0019228,GO:0021766,GO:0023041,GO:0030054,GO:0030424,GO:0030425,GO:0031410,GO:0033270,GO:0034613,GO:0042391,GO:0042734,GO:0043025,GO:0043204,GO:0043679,GO:0044224,GO:0044305,GO:0045202,GO:…	startle response|voltage-gated potassium channel activity|delayed rectifier potassium channel activity|potassium channel activity|endoplasmic reticulum|cytosol|plasma membrane|integral component of plasma membrane|potassium ion transport|regulation of muscle contraction|chemical synaptic transmission|neuroblast proliferation|voltage-gated potassium channel complex|cell surface|cell communication …
KCNA3	491.579	736.589	246.57	0.334761	-1.5788	1.84689e-35	1.75626e-32	Down	0.863093	0.771965	0.693536	2.04552	2.20393	2.22091	GeneID:101105466	potassium voltage-gated channel subfamily A member 3	GO:0005244,GO:0005249,GO:0005251,GO:0005886,GO:0006813,GO:0008076,GO:0015271,GO:0016021,GO:0030424,GO:0034765,GO:0044305,GO:0045121,GO:0051260,GO:0071435,GO:0071805,GO:0098978,GO:0099055,GO:0099056	voltage-gated ion channel activity|voltage-gated potassium channel activity|delayed rectifier potassium channel activity|plasma membrane|potassium ion transport|voltage-gated potassium channel complex|outward rectifier potassium channel activity|integral component of membrane|axon|regulation of ion transmembrane transport|calyx of Held|membrane raft|protein homooligomerization|potassium ion expor…
KCNC3	25.0407	34.063	16.0184	0.470501	-1.08773	0.0124129	0.0515151	Down	0.0714388	0.057903	0.0653093	0.11481	0.120696	0.148776	GeneID:101116251	potassium voltage-gated channel subfamily C member 3	GO:0005249,GO:0005251,GO:0005856,GO:0005886,GO:0005938,GO:0008076,GO:0016021,GO:0030054,GO:0030424,GO:0032590,GO:0032591,GO:0032809,GO:0034765,GO:0042734,GO:0043025,GO:0043204,GO:0051260,GO:0051262,GO:0071805	voltage-gated potassium channel activity|delayed rectifier potassium channel activity|cytoskeleton|plasma membrane|cell cortex|voltage-gated potassium channel complex|integral component of membrane|cell junction|axon|dendrite membrane|dendritic spine membrane|neuronal cell body membrane|regulation of ion transmembrane transport|presynaptic membrane|neuronal cell body|perikaryon|protein homooligom…
KCNE4	61.1738	95.5589	26.7887	0.280098	-1.836	9.8111e-10	3.90909e-08	Down	0.298978	0.316852	0.216794	0.96472	0.939094	0.863662	GeneID:101120989	potassium voltage-gated channel subfamily E regulatory subunit 4	GO:0005249,GO:0015459,GO:0016021,GO:0016324,GO:0044325,GO:0060307,GO:0071435,GO:0086005,GO:0086011,GO:0086091,GO:0098915,GO:1902260	voltage-gated potassium channel activity|potassium channel regulator activity|integral component of membrane|apical plasma membrane|ion channel binding|regulation of ventricular cardiac muscle cell membrane repolarization|potassium ion export|ventricular cardiac muscle cell action potential|membrane repolarization during action potential|regulation of heart rate by cardiac conduction|membrane rep…
KCNH2	13.6815	23.8691	3.49387	0.145543	-2.78048	8.43421e-05	0.000849016	Down	0.0195799	0.0402041	0.0133372	0.0962096	0.153639	0.217474	GeneID:101106315	potassium voltage-gated channel subfamily H member 2	GO:0000155,GO:0005249,GO:0005622,GO:0005886,GO:0016021,GO:0034765	phosphorelay sensor kinase activity|voltage-gated potassium channel activity|intracellular|plasma membrane|integral component of membrane|regulation of ion transmembrane transport
KCNJ14	42.3141	71.3447	13.2834	0.185727	-2.42875	4.06636e-09	1.38196e-07	Down	0.0592306	0.172295	0.191644	0.831544	0.760532	0.524243	GeneID:101106197	potassium voltage-gated channel subfamily J member 14	GO:0005242,GO:0005886,GO:0008076,GO:0010107,GO:0030425,GO:0034765,GO:0043025	inward rectifier potassium channel activity|plasma membrane|voltage-gated potassium channel complex|potassium ion import|dendrite|regulation of ion transmembrane transport|neuronal cell body	oas04725,oas04921	Cholinergic synapse|Oxytocin signaling pathway
KCNJ15	399.441	622.653	176.229	0.283005	-1.8211	0.00805174	0.0363795	Down	1.01221	1.77739	1.16975	5.90225	5.94573	1.24298	GeneID:101117981	potassium voltage-gated channel subfamily J member 15	GO:0005242,GO:0005886,GO:0005887,GO:0006813,GO:0010107,GO:0015467,GO:0034765	inward rectifier potassium channel activity|plasma membrane|integral component of plasma membrane|potassium ion transport|potassium ion import|G-protein activated inward rectifier potassium channel activity|regulation of ion transmembrane transport	oas04971	Gastric acid secretion
KCNJ5	1469.79	2165.99	773.597	0.357163	-1.48535	0.000282482	0.00235495	Down	5.77771	3.80812	2.98255	8.79145	8.64329	15.2344	GeneID:101116101	potassium voltage-gated channel subfamily J member 5	GO:0005242,GO:0010107,GO:0015467,GO:0016021,GO:0034765	inward rectifier potassium channel activity|potassium ion import|G-protein activated inward rectifier potassium channel activity|integral component of membrane|regulation of ion transmembrane transport	oas04713,oas04723,oas04726,oas04728,oas04915,oas04921,oas04925,oas05032	Circadian entrainment|Retrograde endocannabinoid signaling|Serotonergic synapse|Dopaminergic synapse|Estrogen signaling pathway|Oxytocin signaling pathway|Aldosterone synthesis and secretion|Morphine addiction
KCNK5	18.4864	9.84627	27.1265	2.75478	1.46194	0.00824991	0.0371454	Up	0.202345	0.253905	0.199089	0.118364	0.0721706	0.0312144	GeneID:101103020	potassium two pore domain channel subfamily K member 5	GO:0005249,GO:0005267,GO:0005887,GO:0006813,GO:0007588,GO:0022841,GO:0034765,GO:0071805	voltage-gated potassium channel activity|potassium channel activity|integral component of plasma membrane|potassium ion transport|excretion|potassium ion leak channel activity|regulation of ion transmembrane transport|potassium ion transmembrane transport	oas04742,oas04974	Taste transduction|Protein digestion and absorption
KHDRBS3	148.379	90.2033	206.554	2.28952	1.19505	3.40351e-07	7.08726e-06	Up	2.27998	2.21875	2.716	0.716785	0.820912	1.38395	GeneID:101119650	KH RNA binding domain containing, signal transduction associated 3	GO:0003723,GO:0003727,GO:0005634,GO:0005654,GO:0006397,GO:0017124,GO:0019904,GO:0033120,GO:0042802,GO:0048024,GO:0051259	RNA binding|single-stranded RNA binding|nucleus|nucleoplasm|mRNA processing|SH3 domain binding|protein domain specific binding|positive regulation of RNA splicing|identical protein binding|regulation of mRNA splicing, via spliceosome|protein complex oligomerization
KIAA0754	517.767	696.992	338.543	0.485819	-1.04151	6.17972e-19	1.10184e-16	Down	1.52537	1.37547	1.51319	2.99977	2.76777	2.67664	GeneID:105603997	KIAA0754 ortholog
KIAA1211	19.7492	11.944	27.5545	2.30932	1.20747	0.0177557	0.0677005	Up	0.115071	0.0701454	0.135945	0.049222	0.0384774	0.0411886	GeneID:101108572	KIAA1211 ortholog
KIAA1549L	3.47388	6.32795	0.619817	0.0989818	-3.33669	0.0216232	0.0790855	Down	0.00289429	0	0.00295725	0.0152374	0.0278724	0.0120551	GeneID:101102174	KIAA1549 like	GO:0016021	integral component of membrane
KIF21B	887.133	1200.5	573.765	0.478063	-1.06473	2.18648e-13	1.68583e-11	Down	2.19818	1.61778	1.81479	4.22306	3.92122	2.8074	GeneID:101108506	kinesin family member 21B	GO:0003777,GO:0005524,GO:0005871,GO:0005874,GO:0007018,GO:0008017,GO:0016887,GO:0030425,GO:0030426,GO:0031410	microtubule motor activity|ATP binding|kinesin complex|microtubule|microtubule-based movement|microtubule binding|ATPase activity|dendrite|growth cone|cytoplasmic vesicle
KLHL29	235.592	314.202	156.982	0.499424	-1.00166	1.52139e-07	3.53439e-06	Down	0.943673	1.12117	0.939944	2.23096	2.00044	1.37197	GeneID:101104975	kelch like family member 29
KLHL3	31.3214	14.0545	48.5883	3.45992	1.79074	1.87718e-05	0.000232835	Up	0.218402	0.143357	0.201203	0.0490083	0.0574655	0.0447379	GeneID:101107091	kelch like family member 3	GO:0003779,GO:0005829,GO:0005856,GO:0006511,GO:0016567,GO:0031463,GO:0050801,GO:0070294,GO:0070936,GO:0072156	actin binding|cytosol|cytoskeleton|ubiquitin-dependent protein catabolic process|protein ubiquitination|Cul3-RING ubiquitin ligase complex|ion homeostasis|renal sodium ion absorption|protein K48-linked ubiquitination|distal tubule morphogenesis
KLHL38	51.9358	18.6299	85.2417	4.57429	2.19355	7.15891e-10	2.90098e-08	Up	0.37545	0.575478	0.502484	0.116926	0.113165	0.0660758	GeneID:101107608	kelch like family member 38
[truncated: 363 more rows]
